# Supplementary material for: Double-target self-supervised clustering with multi-feature fusion for medical question texts
Source: PeerJ journal article supplement (doi:10.7717/peerj-cs.2075), 2024-06-28
Supplement: raw_data_StaffSS.zip [file raw_data_StaffSS.zip]

## Sheet: Sheet1【删除类4276条】
question	answer
肝癌转移到肠的症状？	肝癌发生肠道转移，除原发性疾病的症状外，肠道症状是否出现及性质、严重程度取决于转移灶的大小、数目、位置等，症状不典型，主要表现可能有：腹痛腹胀、黑便、消瘦、乏力、贫血、消化道梗阻等症状。
肝癌转移到脑部的症状？	肝癌发生脑转移，除原发性疾病的症状外，脑部症状是否出现及严重程度取决于疾病的进展，主要表现可能有：1、定位症状：与转移瘤所损害的功能区有关，如感觉障碍、对方向、位置的辨别能力丧失，幻视、偏盲、不能计算，并有失读和失写等。 2、颅内压增高症状：头痛、呕吐、视神经水肿等。
肝癌转移到肺的症状	肝癌发生肺转移，除原发性疾病的症状外，肺部症状是否出现及严重程度取决于疾病的进展，主要表现可能有：咳嗽咳血、呼吸困难、血性胸水、胸部疼痛等症状。
肝癌转移是什么意思？	肝癌转移是肝脏的恶性肿瘤通过血行转移、淋巴转移、种植性转移、直接侵犯等各种方式转移到肝脏其他部位或远处其他器官。肝癌的转移可分为肝内转移和肝外转移。由于肝内有许多丰富的血窦,因此肝内转移最为常见,多数肝癌患者在早期即可有肝内转移。肝外转移多见于肝癌晚期,是由于癌细胞累及肝静脉后进入体循环以及浸润种植等其他方式转移至全身各部,可涉及肺、脑、骨骼、肾上腺、腹膜、淋巴结等部位。
原发性肝癌最常见转移方式是？	血行转移是肝癌转移中最为常见的转移方式，首先是肝内的转移，如形成门静脉癌栓，门静脉癌栓表现为肝癌同侧的门静脉分支内有实质性的癌栓，有的癌栓可以沿门静脉生长到门静脉的主干。肝内转移可以表现为在肝癌结节的周围有多发的小的转移灶，把这些转移灶称之为卫星灶或子灶。肝癌也可以经过血液途径转移到远处的器官，形成转移灶。如肺、骨、肾上腺、脑等处。
请问肝癌转移到肾上腺还能做肝脏转移吗	目前临床上肝癌伴发远处转移不考虑行肝移植手术，可考虑其他的治疗方案如放疗、化疗，介入等。具体治疗方案应就诊于正规医院，联合肝胆外科、泌尿外科、肿瘤内科等多学科会诊后决定具体的治疗方案。
如何判断肝癌有没有转移？	肝癌的转移可分为肝内转移和肝外转移。多数肝癌患者在早期即可有肝内转移。肝外转移多见于肝癌晚期,是由于癌细胞累及肝静脉后进入体循环以及浸润种植等其他方式转移至全身各部,可涉及肺、脑、骨骼、肾上腺、腹膜、淋巴结等部位。在相应位置早期可无明显症状，随着疾病进展出现相应的症状，如肺转移出现胸痛、咳嗽等。如综合患者情况考虑存在转移可能，可行相应位置的影像学检查。亦可直接行全身PET-CT检查排除转移灶。
原发性肝癌会转移吗？	肝癌转移是肝脏的恶性肿瘤通过血行转移、淋巴转移、种植性转移、直接侵犯等各种方式转移到肝脏其他部位或远处其他器官。可分为肝内转移和肝外转移。由于肝内有许多丰富的血窦,因此肝内转移最为常见,多数肝癌患者在早期即可有肝内转移。肝外转移多见于肝癌晚期,是由于癌细胞累及肝静脉后进入体循环以及浸润种植等其他方式转移至全身各部,可涉及肺、脑、骨骼、肾上腺、腹膜、淋巴结等部位。由此可见，原发性肝癌存在转移的可能。
原发性肝癌会扩散吗？	肝癌转移是肝脏的恶性肿瘤通过血行转移、淋巴转移、种植性转移、直接侵犯等各种方式转移到肝脏其他部位或远处其他器官。可分为肝内转移和肝外转移。由于肝内有许多丰富的血窦,因此肝内转移最为常见,多数肝癌患者在早期即可有肝内转移。肝外转移多见于肝癌晚期,是由于癌细胞累及肝静脉后进入体循环以及浸润种植等其他方式转移至全身各部,可涉及肺、脑、骨骼、肾上腺、腹膜、淋巴结等部位。由此可见，原发性肝癌存在转移的可能。
肝癌转移到骨头怎么办?	肝癌骨转移病情多较晚，多数患者为多发性骨破坏。目前临床上可在积极控制肿瘤原发灶的基础上对骨转移灶采取手术、介入、放疗、二磷酸盐类药物治疗、疼痛治疗等方法。建议正规医疗机构就诊，由专科医生根据患者情况制定治疗方案。
肝癌骨转移还有救吗？	肝癌骨转移病情多较晚，多数患者为多发性骨破坏。目前临床上可在积极控制肿瘤原发灶的基础上对骨转移灶采取手术、介入、放疗、二磷酸盐类药物治疗、疼痛治疗等方法。建议正规医疗机构就诊，由专科医生根据患者情况制定治疗方案。
肝癌转移腹腔怎么治疗？	肝癌腹腔种植转移病情较晚，一般无手术指征，多采取放化疗方法。建议正规医院肿瘤内科就诊，根据患者综合情况确定治疗方案。
肝癌转移淋巴治疗方法	肝癌合并淋巴结转移病情多较晚，预后不佳。目前可根据患者综合情况选择手术治疗、介入治疗、放化疗等方法，其中手术切除应注意对淋巴结的探查及清扫。建议正规医疗机构就诊，由专科医生根据患者情况制定治疗方案。
肝癌淋巴转移怎么办？	肝癌合并淋巴结转移病情多较晚，预后不佳。目前可根据患者综合情况选择手术治疗、介入治疗、放化疗等方法，其中手术切除应注意对淋巴结的探查及清扫。建议正规医疗机构就诊，由专科医生根据患者情况制定治疗方案。
肝癌淋巴结转移怎么治疗	肝癌合并淋巴结转移病情多较晚，预后不佳。目前可根据患者综合情况选择手术治疗、介入治疗、放化疗等方法，其中手术切除应注意对淋巴结的探查及清扫。建议正规医疗机构就诊，由专科医生根据患者情况制定治疗方案。
肝癌肝内转移怎么治疗?	肝癌最早在肝内转移，很容易侵犯门静脉及分支并形成瘤栓，脱落后在肝内引起多发性转移灶，首选的治疗方法是进行手术切除，可根据转移灶的大小、数目、分布范围决定手术方式。在无手术指征时可选择射频消融、介入、放化疗、肝移植等方法。建议正规医疗机构就诊，由专科医生根据患者情况制定治疗方案。
肝癌肝内转移怎么办？	肝癌最早在肝内转移，很容易侵犯门静脉及分支并形成瘤栓，脱落后在肝内引起多发性转移灶，首选的治疗方法是进行手术切除，可根据转移灶的大小、数目、分布范围决定手术方式。在无手术指征时可选择射频消融、介入、放化疗、肝移植等方法。建议正规医疗机构就诊，由专科医生根据患者情况制定治疗方案。
肝癌手术后肝内转移应该怎么办?	肝癌最早在肝内转移，很容易侵犯门静脉及分支并形成瘤栓，脱落后在肝内引起多发性转移灶，首选的治疗方法是进行手术切除，可根据转移灶的大小、数目、分布范围决定手术方式。在无手术指征时可选择射频消融、介入、放化疗、肝移植等方法。建议正规医疗机构就诊，由专科医生根据患者情况制定治疗方案。
爸爸肝癌已经转移到肺部了怎么办？	肝癌肺转移发生时患者病情多属于晚期，目前普遍观点主张在积极控制肝内病灶和严格把握各种治疗技术的适应征的前提下，依据患者ECOG评分、Child-Pugh分级，以及原发病灶和肺部继发性肿瘤的部位、大小、数目、有无血管侵犯等差异选择治疗方案，包括肺部外科手术治疗、血管介入治疗、局部消融治疗、放射治疗、药物化疗、分子靶向治疗等。建议正规医疗机构就诊，由专科医生根据患者情况制定个体化治疗方案及联合多种方式的综合治疗。
肝癌肺转移后怎么办？	肝癌肺转移发生时患者病情多属于晚期，目前普遍观点主张在积极控制肝内病灶和严格把握各种治疗技术的适应征的前提下，依据患者ECOG评分、Child-Pugh分级，以及原发病灶和肺部继发性肿瘤的部位、大小、数目、有无血管侵犯等差异选择治疗方案，包括肺部外科手术治疗、血管介入治疗、局部消融治疗、放射治疗、药物化疗、分子靶向治疗等。建议正规医疗机构就诊，由专科医生根据患者情况制定个体化治疗方案及联合多种方式的综合治疗。
肝癌转移到肺有1厘米阴影能不能做手术	肝癌肺转移发生时患者病情多属于晚期，目前普遍观点主张在积极控制肝内病灶和严格把握各种治疗技术的适应征的前提下，依据患者ECOG评分、Child-Pugh分级，以及原发病灶和肺部继发性肿瘤的部位、大小、数目、有无血管侵犯等差异选择治疗方案，包括肺部外科手术治疗、血管介入治疗、局部消融治疗、放射治疗、药物化疗、分子靶向治疗等。建议正规医疗机构就诊，由专科医生根据患者情况制定个体化治疗方案及联合多种方式的综合治疗。
肝癌转移到肺能治吗?	肝癌肺转移发生时患者病情多属于晚期，目前普遍观点主张在积极控制肝内病灶和严格把握各种治疗技术的适应征的前提下，依据患者ECOG评分、Child-Pugh分级，以及原发病灶和肺部继发性肿瘤的部位、大小、数目、有无血管侵犯等差异选择治疗方案，包括肺部外科手术治疗、血管介入治疗、局部消融治疗、放射治疗、药物化疗、分子靶向治疗等。建议正规医疗机构就诊，由专科医生根据患者情况制定个体化治疗方案及联合多种方式的综合治疗。
肝癌肺转移怎么治疗	肝癌肺转移发生时患者病情多属于晚期，目前普遍观点主张在积极控制肝内病灶和严格把握各种治疗技术的适应征的前提下，依据患者ECOG评分、Child-Pugh分级，以及原发病灶和肺部继发性肿瘤的部位、大小、数目、有无血管侵犯等差异选择治疗方案，包括肺部外科手术治疗、血管介入治疗、局部消融治疗、放射治疗、药物化疗、分子靶向治疗等。建议正规医疗机构就诊，由专科医生根据患者情况制定个体化治疗方案及联合多种方式的综合治疗。
肝癌脑转移怎么治疗？	肝癌脑转移发生时患者病情多属于晚期，对于晚期肝癌脑转移治疗难度相当大，临床上目前主张在积极控制肝内病灶和严格把握各种治疗技术的适应征的前提下选择手术治疗或放化疗。建议正规医疗机构就诊，由专科医生根据患者情况制定治疗方案。
肝门静脉癌栓可以控制吗？	手术切除是肝癌合并门静脉癌栓患者首选并有可能治愈的方法，但大部分患者发现时已失去手术机会，且术后复发率较高。目前临床应用的非手术治疗主要有TACE、肝动脉灌注化疗、放疗、区域性治疗、靶向治疗等。建议正规医疗机构就诊，由专科医生根据患者情况制定治疗方案。
肝癌肺转移吃什么靶向药？	肝癌肺转移发生时患者病情多属于晚期，目前临床上用于治疗肝癌的分子靶向药物主要为索拉菲尼，它是一种口服的多酶抑制剂，通过选择性作用于 RAF激酶从而抑制肿瘤细胞增殖。除索拉菲尼外，一系列新的靶向药物正在临床试验研究中，如舒尼替尼、布立尼布、利尼伐尼、雷莫芦单抗、阿帕替尼和厄洛替尼等，其临床疗效还需要进一步证实。除化疗外，还可选择外科手术治疗，放疗等方法。建议正规医疗机构就诊，由专科医生根据患者情况制定个体化治疗方案及联合多种方式的综合治疗。
吃了肝癌病人的口水唾液会传染肝癌？	肝癌疾病本身并不具备传染性。传染必须具备三个条件：传染源、传播途径及易感染人群。首先癌细胞并不是传染源，它只能在患者的体内进行扩散，不能自发对患者以外的人体进行传染，因此，能够形成传染的第一条途径就已经不完整了，故传染无法形成。因此，与肝癌患者进行日常接触如共同用餐、拥抱等不会造成传染。肝癌也不会通过空气、唾液、腹水及性生活传染其他人。同理，肝硬化也不会感染他人。平时肝脏疾病方面所说的传染是指病毒性肝炎的传染，多指乙肝及丙肝。如乙型肝炎可以通过母婴、血液、性交等方式传播。
肝癌晚期全身变黄了具有传染性吗？	肝癌疾病本身并不具备传染性。传染必须具备三个条件：传染源、传播途径及易感染人群。首先癌细胞并不是传染源，它只能在患者的体内进行扩散，不能自发对患者以外的人体进行传染，因此，能够形成传染的第一条途径就已经不完整了，故传染无法形成。因此，与肝癌患者进行日常接触如共同用餐、拥抱等不会造成传染。肝癌也不会通过空气、唾液、腹水及性生活传染其他人。同理，肝硬化也不会感染他人。平时肝脏疾病方面所说的传染是指病毒性肝炎的传染，多指乙肝及丙肝。如乙型肝炎可以通过母婴、血液、性交等方式传播。
肝癌肺部感染了会不会传染给家里人？	肝癌疾病本身并不具备传染性。传染必须具备三个条件：传染源、传播途径及易感染人群。首先癌细胞并不是传染源，它只能在患者的体内进行扩散，不能自发对患者以外的人体进行传染，因此，能够形成传染的第一条途径就已经不完整了，故传染无法形成。因此，与肝癌患者进行日常接触如共同用餐、拥抱等不会造成传染。肝癌也不会通过空气、唾液、腹水及性生活传染其他人。同理，肝硬化也不会感染他人。平时肝脏疾病方面所说的传染是指病毒性肝炎的传染，多指乙肝及丙肝。如乙型肝炎可以通过母婴、血液、性交等方式传播。
肝癌晚期在空气中会不会传染？	肝癌疾病本身并不具备传染性。传染必须具备三个条件：传染源、传播途径及易感染人群。首先癌细胞并不是传染源，它只能在患者的体内进行扩散，不能自发对患者以外的人体进行传染，因此，能够形成传染的第一条途径就已经不完整了，故传染无法形成。因此，与肝癌患者进行日常接触如共同用餐、拥抱等不会造成传染。肝癌也不会通过空气、唾液、腹水及性生活传染其他人。同理，肝硬化也不会感染他人。平时肝脏疾病方面所说的传染是指病毒性肝炎的传染，多指乙肝及丙肝。如乙型肝炎可以通过母婴、血液、性交等方式传播。
照顾肝癌晚期会传染吗?	肝癌疾病本身并不具备传染性。传染必须具备三个条件：传染源、传播途径及易感染人群。首先癌细胞并不是传染源，它只能在患者的体内进行扩散，不能自发对患者以外的人体进行传染，因此，能够形成传染的第一条途径就已经不完整了，故传染无法形成。因此，与肝癌患者进行日常接触如共同用餐、拥抱等不会造成传染。肝癌也不会通过空气、唾液、腹水及性生活传染其他人。同理，肝硬化也不会感染他人。平时肝脏疾病方面所说的传染是指病毒性肝炎的传染，多指乙肝及丙肝。如乙型肝炎可以通过母婴、血液、性交等方式传播。
乙肝肝癌晚期会传染吗？	肝癌疾病本身并不具备传染性。传染必须具备三个条件：传染源、传播途径及易感染人群。首先癌细胞并不是传染源，它只能在患者的体内进行扩散，不能自发对患者以外的人体进行传染，因此，能够形成传染的第一条途径就已经不完整了，故传染无法形成。因此，与肝癌患者进行日常接触如共同用餐、拥抱等不会造成传染。肝癌也不会通过空气、唾液、腹水及性生活传染其他人。同理，肝硬化也不会感染他人。平时肝脏疾病方面所说的传染是指病毒性肝炎的传染，多指乙肝及丙肝。如乙型肝炎可以通过母婴、血液、性交等方式传播。
接触肝癌腹水会传染吗？	肝癌疾病本身并不具备传染性。传染必须具备三个条件：传染源、传播途径及易感染人群。首先癌细胞并不是传染源，它只能在患者的体内进行扩散，不能自发对患者以外的人体进行传染，因此，能够形成传染的第一条途径就已经不完整了，故传染无法形成。因此，与肝癌患者进行日常接触如共同用餐、拥抱等不会造成传染。肝癌也不会通过空气、唾液、腹水及性生活传染其他人。同理，肝硬化也不会感染他人。平时肝脏疾病方面所说的传染是指病毒性肝炎的传染，多指乙肝及丙肝。如乙型肝炎可以通过母婴、血液、性交等方式传播。
和肝癌病人吃饭传染吗？	肝癌疾病本身并不具备传染性。传染必须具备三个条件：传染源、传播途径及易感染人群。首先癌细胞并不是传染源，它只能在患者的体内进行扩散，不能自发对患者以外的人体进行传染，因此，能够形成传染的第一条途径就已经不完整了，故传染无法形成。因此，与肝癌患者进行日常接触如共同用餐、拥抱等不会造成传染。肝癌也不会通过空气、唾液、腹水及性生活传染其他人。同理，肝硬化也不会感染他人。平时肝脏疾病方面所说的传染是指病毒性肝炎的传染，多指乙肝及丙肝。如乙型肝炎可以通过母婴、血液、性交等方式传播。
和肝癌的人一起吃饭会传染吗？	肝癌疾病本身并不具备传染性。传染必须具备三个条件：传染源、传播途径及易感染人群。首先癌细胞并不是传染源，它只能在患者的体内进行扩散，不能自发对患者以外的人体进行传染，因此，能够形成传染的第一条途径就已经不完整了，故传染无法形成。因此，与肝癌患者进行日常接触如共同用餐、拥抱等不会造成传染。肝癌也不会通过空气、唾液、腹水及性生活传染其他人。同理，肝硬化也不会感染他人。平时肝脏疾病方面所说的传染是指病毒性肝炎的传染，多指乙肝及丙肝。如乙型肝炎可以通过母婴、血液、性交等方式传播。
因为乙肝引起的肝癌患者会传染吗？	肝癌疾病本身并不具备传染性。传染必须具备三个条件：传染源、传播途径及易感染人群。首先癌细胞并不是传染源，它只能在患者的体内进行扩散，不能自发对患者以外的人体进行传染，因此，能够形成传染的第一条途径就已经不完整了，故传染无法形成。因此，与肝癌患者进行日常接触如共同用餐、拥抱等不会造成传染。肝癌也不会通过空气、唾液、腹水及性生活传染其他人。同理，肝硬化也不会感染他人。平时肝脏疾病方面所说的传染是指病毒性肝炎的传染，多指乙肝及丙肝。如乙型肝炎可以通过母婴、血液、性交等方式传播。
我家人得了肝癌共用餐具会传染吗？	肝癌疾病本身并不具备传染性。传染必须具备三个条件：传染源、传播途径及易感染人群。首先癌细胞并不是传染源，它只能在患者的体内进行扩散，不能自发对患者以外的人体进行传染，因此，能够形成传染的第一条途径就已经不完整了，故传染无法形成。因此，与肝癌患者进行日常接触如共同用餐、拥抱等不会造成传染。肝癌也不会通过空气、唾液、腹水及性生活传染其他人。同理，肝硬化也不会感染他人。平时肝脏疾病方面所说的传染是指病毒性肝炎的传染，多指乙肝及丙肝。如乙型肝炎可以通过母婴、血液、性交等方式传播。
家有肝癌患者不分碗筷会传染吗？	肝癌疾病本身并不具备传染性。传染必须具备三个条件：传染源、传播途径及易感染人群。首先癌细胞并不是传染源，它只能在患者的体内进行扩散，不能自发对患者以外的人体进行传染，因此，能够形成传染的第一条途径就已经不完整了，故传染无法形成。因此，与肝癌患者进行日常接触如共同用餐、拥抱等不会造成传染。肝癌也不会通过空气、唾液、腹水及性生活传染其他人。同理，肝硬化也不会感染他人。平时肝脏疾病方面所说的传染是指病毒性肝炎的传染，多指乙肝及丙肝。如乙型肝炎可以通过母婴、血液、性交等方式传播。
有肝癌晚期病人，陪护家属怕传染，陪护家属应该去医院吗？	肝癌疾病本身并不具备传染性。传染必须具备三个条件：传染源、传播途径及易感染人群。首先癌细胞并不是传染源，它只能在患者的体内进行扩散，不能自发对患者以外的人体进行传染，因此，能够形成传染的第一条途径就已经不完整了，故传染无法形成。因此，与肝癌患者进行日常接触如共同用餐、拥抱等不会造成传染。肝癌也不会通过空气、唾液、腹水及性生活传染其他人。同理，肝硬化也不会感染他人。平时肝脏疾病方面所说的传染是指病毒性肝炎的传染，多指乙肝及丙肝。如乙型肝炎可以通过母婴、血液、性交等方式传播。
请问肺癌肝癌晚期具有传染性吗	肝癌疾病本身并不具备传染性。传染必须具备三个条件：传染源、传播途径及易感染人群。首先癌细胞并不是传染源，它只能在患者的体内进行扩散，不能自发对患者以外的人体进行传染，因此，能够形成传染的第一条途径就已经不完整了，故传染无法形成。因此，与肝癌患者进行日常接触如共同用餐、拥抱等不会造成传染。肝癌也不会通过空气、唾液、腹水及性生活传染其他人。同理，肝硬化也不会感染他人。平时肝脏疾病方面所说的传染是指病毒性肝炎的传染，多指乙肝及丙肝。如乙型肝炎可以通过母婴、血液、性交等方式传播。
肝癌黄疸有传染吗？	肝癌疾病本身并不具备传染性。传染必须具备三个条件：传染源、传播途径及易感染人群。首先癌细胞并不是传染源，它只能在患者的体内进行扩散，不能自发对患者以外的人体进行传染，因此，能够形成传染的第一条途径就已经不完整了，故传染无法形成。因此，与肝癌患者进行日常接触如共同用餐、拥抱等不会造成传染。肝癌也不会通过空气、唾液、腹水及性生活传染其他人。同理，肝硬化也不会感染他人。平时肝脏疾病方面所说的传染是指病毒性肝炎的传染，多指乙肝及丙肝。如乙型肝炎可以通过母婴、血液、性交等方式传播。
肝癌夫妻会传染吗?	肝癌疾病本身并不具备传染性。传染必须具备三个条件：传染源、传播途径及易感染人群。首先癌细胞并不是传染源，它只能在患者的体内进行扩散，不能自发对患者以外的人体进行传染，因此，能够形成传染的第一条途径就已经不完整了，故传染无法形成。因此，与肝癌患者进行日常接触如共同用餐、拥抱等不会造成传染。肝癌也不会通过空气、唾液、腹水及性生活传染其他人。同理，肝硬化也不会感染他人。平时肝脏疾病方面所说的传染是指病毒性肝炎的传染，多指乙肝及丙肝。如乙型肝炎可以通过母婴、血液、性交等方式传播。
肝癌破裂会传染吗？	肝癌疾病本身并不具备传染性。传染必须具备三个条件：传染源、传播途径及易感染人群。首先癌细胞并不是传染源，它只能在患者的体内进行扩散，不能自发对患者以外的人体进行传染，因此，能够形成传染的第一条途径就已经不完整了，故传染无法形成。因此，与肝癌患者进行日常接触如共同用餐、拥抱等不会造成传染。肝癌也不会通过空气、唾液、腹水及性生活传染其他人。同理，肝硬化也不会感染他人。平时肝脏疾病方面所说的传染是指病毒性肝炎的传染，多指乙肝及丙肝。如乙型肝炎可以通过母婴、血液、性交等方式传播。
肝癌晚期腹水传染吗	肝癌疾病本身并不具备传染性。传染必须具备三个条件：传染源、传播途径及易感染人群。首先癌细胞并不是传染源，它只能在患者的体内进行扩散，不能自发对患者以外的人体进行传染，因此，能够形成传染的第一条途径就已经不完整了，故传染无法形成。因此，与肝癌患者进行日常接触如共同用餐、拥抱等不会造成传染。肝癌也不会通过空气、唾液、腹水及性生活传染其他人。同理，肝硬化也不会感染他人。平时肝脏疾病方面所说的传染是指病毒性肝炎的传染，多指乙肝及丙肝。如乙型肝炎可以通过母婴、血液、性交等方式传播。
肝癌晚期会通过什么途径传染	肝癌疾病本身并不具备传染性。传染必须具备三个条件：传染源、传播途径及易感染人群。首先癌细胞并不是传染源，它只能在患者的体内进行扩散，不能自发对患者以外的人体进行传染，因此，能够形成传染的第一条途径就已经不完整了，故传染无法形成。因此，与肝癌患者进行日常接触如共同用餐、拥抱等不会造成传染。肝癌也不会通过空气、唾液、腹水及性生活传染其他人。同理，肝硬化也不会感染他人。平时肝脏疾病方面所说的传染是指病毒性肝炎的传染，多指乙肝及丙肝。如乙型肝炎可以通过母婴、血液、性交等方式传播。
肝癌病人的唾液口水粘到我的伤口上会传染肝癌么？	肝癌疾病本身并不具备传染性。传染必须具备三个条件：传染源、传播途径及易感染人群。首先癌细胞并不是传染源，它只能在患者的体内进行扩散，不能自发对患者以外的人体进行传染，因此，能够形成传染的第一条途径就已经不完整了，故传染无法形成。因此，与肝癌患者进行日常接触如共同用餐、拥抱等不会造成传染。肝癌也不会通过空气、唾液、腹水及性生活传染其他人。同理，肝硬化也不会感染他人。平时肝脏疾病方面所说的传染是指病毒性肝炎的传染，多指乙肝及丙肝。如乙型肝炎可以通过母婴、血液、性交等方式传播。
和肝癌病人接触要注意什么？	肝癌疾病本身并不具备传染性。传染必须具备三个条件：传染源、传播途径及易感染人群。首先癌细胞并不是传染源，它只能在患者的体内进行扩散，不能自发对患者以外的人体进行传染，因此，能够形成传染的第一条途径就已经不完整了，故传染无法形成。因此，与肝癌患者进行日常接触如共同用餐、拥抱等不会造成传染。肝癌也不会通过空气、唾液、腹水及性生活传染其他人。同理，肝硬化也不会感染他人。平时肝脏疾病方面所说的传染是指病毒性肝炎的传染，多指乙肝及丙肝。如乙型肝炎可以通过母婴、血液、性交等方式传播。
一起吃饭肝癌会传染吗	肝癌疾病本身并不具备传染性。传染必须具备三个条件：传染源、传播途径及易感染人群。首先癌细胞并不是传染源，它只能在患者的体内进行扩散，不能自发对患者以外的人体进行传染，因此，能够形成传染的第一条途径就已经不完整了，故传染无法形成。因此，与肝癌患者进行日常接触如共同用餐、拥抱等不会造成传染。肝癌也不会通过空气、唾液、腹水及性生活传染其他人。同理，肝硬化也不会感染他人。平时肝脏疾病方面所说的传染是指病毒性肝炎的传染，多指乙肝及丙肝。如乙型肝炎可以通过母婴、血液、性交等方式传播。
姥爷是肝癌晚期，现在转移到肺了，这样会不会传染呢，	肝癌疾病本身并不具备传染性。传染必须具备三个条件：传染源、传播途径及易感染人群。首先癌细胞并不是传染源，它只能在患者的体内进行扩散，不能自发对患者以外的人体进行传染，因此，能够形成传染的第一条途径就已经不完整了，故传染无法形成。因此，与肝癌患者进行日常接触如共同用餐、拥抱等不会造成传染。肝癌也不会通过空气、唾液、腹水及性生活传染其他人。同理，肝硬化也不会感染他人。平时肝脏疾病方面所说的传染是指病毒性肝炎的传染，多指乙肝及丙肝。如乙型肝炎可以通过母婴、血液、性交等方式传播。
以前是乙肝现在转成肝癌了，会不会传染	肝癌疾病本身并不具备传染性。传染必须具备三个条件：传染源、传播途径及易感染人群。首先癌细胞并不是传染源，它只能在患者的体内进行扩散，不能自发对患者以外的人体进行传染，因此，能够形成传染的第一条途径就已经不完整了，故传染无法形成。因此，与肝癌患者进行日常接触如共同用餐、拥抱等不会造成传染。肝癌也不会通过空气、唾液、腹水及性生活传染其他人。同理，肝硬化也不会感染他人。平时肝脏疾病方面所说的传染是指病毒性肝炎的传染，多指乙肝及丙肝。如乙型肝炎可以通过母婴、血液、性交等方式传播。
问下有肝癌的人到了晚期老实吐血他的最后一口气传染吗	肝癌疾病本身并不具备传染性。传染必须具备三个条件：传染源、传播途径及易感染人群。首先癌细胞并不是传染源，它只能在患者的体内进行扩散，不能自发对患者以外的人体进行传染，因此，能够形成传染的第一条途径就已经不完整了，故传染无法形成。因此，与肝癌患者进行日常接触如共同用餐、拥抱等不会造成传染。肝癌也不会通过空气、唾液、腹水及性生活传染其他人。同理，肝硬化也不会感染他人。平时肝脏疾病方面所说的传染是指病毒性肝炎的传染，多指乙肝及丙肝。如乙型肝炎可以通过母婴、血液、性交等方式传播。
肝癌扩散到肺部会传染吗	肝癌疾病本身并不具备传染性。传染必须具备三个条件：传染源、传播途径及易感染人群。首先癌细胞并不是传染源，它只能在患者的体内进行扩散，不能自发对患者以外的人体进行传染，因此，能够形成传染的第一条途径就已经不完整了，故传染无法形成。因此，与肝癌患者进行日常接触如共同用餐、拥抱等不会造成传染。肝癌也不会通过空气、唾液、腹水及性生活传染其他人。同理，肝硬化也不会感染他人。平时肝脏疾病方面所说的传染是指病毒性肝炎的传染，多指乙肝及丙肝。如乙型肝炎可以通过母婴、血液、性交等方式传播。
肝癌会不会传染给家人？	肝癌疾病本身并不具备传染性。传染必须具备三个条件：传染源、传播途径及易感染人群。首先癌细胞并不是传染源，它只能在患者的体内进行扩散，不能自发对患者以外的人体进行传染，因此，能够形成传染的第一条途径就已经不完整了，故传染无法形成。因此，与肝癌患者进行日常接触如共同用餐、拥抱等不会造成传染。肝癌也不会通过空气、唾液、腹水及性生活传染其他人。同理，肝硬化也不会感染他人。平时肝脏疾病方面所说的传染是指病毒性肝炎的传染，多指乙肝及丙肝。如乙型肝炎可以通过母婴、血液、性交等方式传播。
肝癌会通过唾液传染吗	肝癌疾病本身并不具备传染性。传染必须具备三个条件：传染源、传播途径及易感染人群。首先癌细胞并不是传染源，它只能在患者的体内进行扩散，不能自发对患者以外的人体进行传染，因此，能够形成传染的第一条途径就已经不完整了，故传染无法形成。因此，与肝癌患者进行日常接触如共同用餐、拥抱等不会造成传染。肝癌也不会通过空气、唾液、腹水及性生活传染其他人。同理，肝硬化也不会感染他人。平时肝脏疾病方面所说的传染是指病毒性肝炎的传染，多指乙肝及丙肝。如乙型肝炎可以通过母婴、血液、性交等方式传播。
肝癌会通过吐液传染吗？	肝癌疾病本身并不具备传染性。传染必须具备三个条件：传染源、传播途径及易感染人群。首先癌细胞并不是传染源，它只能在患者的体内进行扩散，不能自发对患者以外的人体进行传染，因此，能够形成传染的第一条途径就已经不完整了，故传染无法形成。因此，与肝癌患者进行日常接触如共同用餐、拥抱等不会造成传染。肝癌也不会通过空气、唾液、腹水及性生活传染其他人。同理，肝硬化也不会感染他人。平时肝脏疾病方面所说的传染是指病毒性肝炎的传染，多指乙肝及丙肝。如乙型肝炎可以通过母婴、血液、性交等方式传播。
肝癌晚期人快要死了，会传染人吗	肝癌疾病本身并不具备传染性。传染必须具备三个条件：传染源、传播途径及易感染人群。首先癌细胞并不是传染源，它只能在患者的体内进行扩散，不能自发对患者以外的人体进行传染，因此，能够形成传染的第一条途径就已经不完整了，故传染无法形成。因此，与肝癌患者进行日常接触如共同用餐、拥抱等不会造成传染。肝癌也不会通过空气、唾液、腹水及性生活传染其他人。同理，肝硬化也不会感染他人。平时肝脏疾病方面所说的传染是指病毒性肝炎的传染，多指乙肝及丙肝。如乙型肝炎可以通过母婴、血液、性交等方式传播。
得了肝癌的人会传染给其他人吗	肝癌疾病本身并不具备传染性。传染必须具备三个条件：传染源、传播途径及易感染人群。首先癌细胞并不是传染源，它只能在患者的体内进行扩散，不能自发对患者以外的人体进行传染，因此，能够形成传染的第一条途径就已经不完整了，故传染无法形成。因此，与肝癌患者进行日常接触如共同用餐、拥抱等不会造成传染。肝癌也不会通过空气、唾液、腹水及性生活传染其他人。同理，肝硬化也不会感染他人。平时肝脏疾病方面所说的传染是指病毒性肝炎的传染，多指乙肝及丙肝。如乙型肝炎可以通过母婴、血液、性交等方式传播。
家里长辈从乙肝转为肝癌已4年还传染吗？	肝癌疾病本身并不具备传染性。传染必须具备三个条件：传染源、传播途径及易感染人群。首先癌细胞并不是传染源，它只能在患者的体内进行扩散，不能自发对患者以外的人体进行传染，因此，能够形成传染的第一条途径就已经不完整了，故传染无法形成。因此，与肝癌患者进行日常接触如共同用餐、拥抱等不会造成传染。肝癌也不会通过空气、唾液、腹水及性生活传染其他人。同理，肝硬化也不会感染他人。平时肝脏疾病方面所说的传染是指病毒性肝炎的传染，多指乙肝及丙肝。如乙型肝炎可以通过母婴、血液、性交等方式传播。
跟有肝癌的人过性生活会传染吗？	肝癌疾病本身并不具备传染性。传染必须具备三个条件：传染源、传播途径及易感染人群。首先癌细胞并不是传染源，它只能在患者的体内进行扩散，不能自发对患者以外的人体进行传染，因此，能够形成传染的第一条途径就已经不完整了，故传染无法形成。因此，与肝癌患者进行日常接触如共同用餐、拥抱等不会造成传染。肝癌也不会通过空气、唾液、腹水及性生活传染其他人。同理，肝硬化也不会感染他人。平时肝脏疾病方面所说的传染是指病毒性肝炎的传染，多指乙肝及丙肝。如乙型肝炎可以通过母婴、血液、性交等方式传播。
肝癌会传染别人吗？	肝癌疾病本身并不具备传染性。传染必须具备三个条件：传染源、传播途径及易感染人群。首先癌细胞并不是传染源，它只能在患者的体内进行扩散，不能自发对患者以外的人体进行传染，因此，能够形成传染的第一条途径就已经不完整了，故传染无法形成。因此，与肝癌患者进行日常接触如共同用餐、拥抱等不会造成传染。肝癌也不会通过空气、唾液、腹水及性生活传染其他人。同理，肝硬化也不会感染他人。平时肝脏疾病方面所说的传染是指病毒性肝炎的传染，多指乙肝及丙肝。如乙型肝炎可以通过母婴、血液、性交等方式传播。
肝癌能传染人吗？	肝癌疾病本身并不具备传染性。传染必须具备三个条件：传染源、传播途径及易感染人群。首先癌细胞并不是传染源，它只能在患者的体内进行扩散，不能自发对患者以外的人体进行传染，因此，能够形成传染的第一条途径就已经不完整了，故传染无法形成。因此，与肝癌患者进行日常接触如共同用餐、拥抱等不会造成传染。肝癌也不会通过空气、唾液、腹水及性生活传染其他人。同理，肝硬化也不会感染他人。平时肝脏疾病方面所说的传染是指病毒性肝炎的传染，多指乙肝及丙肝。如乙型肝炎可以通过母婴、血液、性交等方式传播。
肝癌会传染给别人吗？	肝癌疾病本身并不具备传染性。传染必须具备三个条件：传染源、传播途径及易感染人群。首先癌细胞并不是传染源，它只能在患者的体内进行扩散，不能自发对患者以外的人体进行传染，因此，能够形成传染的第一条途径就已经不完整了，故传染无法形成。因此，与肝癌患者进行日常接触如共同用餐、拥抱等不会造成传染。肝癌也不会通过空气、唾液、腹水及性生活传染其他人。同理，肝硬化也不会感染他人。平时肝脏疾病方面所说的传染是指病毒性肝炎的传染，多指乙肝及丙肝。如乙型肝炎可以通过母婴、血液、性交等方式传播。
请问是肝炎引起的肝癌中期会传染吗？	肝癌疾病本身并不具备传染性。传染必须具备三个条件：传染源、传播途径及易感染人群。首先癌细胞并不是传染源，它只能在患者的体内进行扩散，不能自发对患者以外的人体进行传染，因此，能够形成传染的第一条途径就已经不完整了，故传染无法形成。因此，与肝癌患者进行日常接触如共同用餐、拥抱等不会造成传染。肝癌也不会通过空气、唾液、腹水及性生活传染其他人。同理，肝硬化也不会感染他人。平时肝脏疾病方面所说的传染是指病毒性肝炎的传染，多指乙肝及丙肝。如乙型肝炎可以通过母婴、血液、性交等方式传播。
和肝癌患者接吻并发生性关系会传染吗？	肝癌疾病本身并不具备传染性。传染必须具备三个条件：传染源、传播途径及易感染人群。首先癌细胞并不是传染源，它只能在患者的体内进行扩散，不能自发对患者以外的人体进行传染，因此，能够形成传染的第一条途径就已经不完整了，故传染无法形成。因此，与肝癌患者进行日常接触如共同用餐、拥抱等不会造成传染。肝癌也不会通过空气、唾液、腹水及性生活传染其他人。同理，肝硬化也不会感染他人。平时肝脏疾病方面所说的传染是指病毒性肝炎的传染，多指乙肝及丙肝。如乙型肝炎可以通过母婴、血液、性交等方式传播。
乙肝转肝癌会不会传染？	肝癌疾病本身并不具备传染性。传染必须具备三个条件：传染源、传播途径及易感染人群。首先癌细胞并不是传染源，它只能在患者的体内进行扩散，不能自发对患者以外的人体进行传染，因此，能够形成传染的第一条途径就已经不完整了，故传染无法形成。因此，与肝癌患者进行日常接触如共同用餐、拥抱等不会造成传染。肝癌也不会通过空气、唾液、腹水及性生活传染其他人。同理，肝硬化也不会感染他人。平时肝脏疾病方面所说的传染是指病毒性肝炎的传染，多指乙肝及丙肝。如乙型肝炎可以通过母婴、血液、性交等方式传播。
肝上有肿瘤传染吗？	肝癌疾病本身并不具备传染性。传染必须具备三个条件：传染源、传播途径及易感染人群。首先癌细胞并不是传染源，它只能在患者的体内进行扩散，不能自发对患者以外的人体进行传染，因此，能够形成传染的第一条途径就已经不完整了，故传染无法形成。因此，与肝癌患者进行日常接触如共同用餐、拥抱等不会造成传染。肝癌也不会通过空气、唾液、腹水及性生活传染其他人。同理，肝硬化也不会感染他人。平时肝脏疾病方面所说的传染是指病毒性肝炎的传染，多指乙肝及丙肝。如乙型肝炎可以通过母婴、血液、性交等方式传播。
肝癌有乙肝会传染人吗？	肝癌疾病本身并不具备传染性。传染必须具备三个条件：传染源、传播途径及易感染人群。首先癌细胞并不是传染源，它只能在患者的体内进行扩散，不能自发对患者以外的人体进行传染，因此，能够形成传染的第一条途径就已经不完整了，故传染无法形成。因此，与肝癌患者进行日常接触如共同用餐、拥抱等不会造成传染。肝癌也不会通过空气、唾液、腹水及性生活传染其他人。同理，肝硬化也不会感染他人。平时肝脏疾病方面所说的传染是指病毒性肝炎的传染，多指乙肝及丙肝。如乙型肝炎可以通过母婴、血液、性交等方式传播。
肝癌晚期死前会传染吗	肝癌疾病本身并不具备传染性。传染必须具备三个条件：传染源、传播途径及易感染人群。首先癌细胞并不是传染源，它只能在患者的体内进行扩散，不能自发对患者以外的人体进行传染，因此，能够形成传染的第一条途径就已经不完整了，故传染无法形成。因此，与肝癌患者进行日常接触如共同用餐、拥抱等不会造成传染。肝癌也不会通过空气、唾液、腹水及性生活传染其他人。同理，肝硬化也不会感染他人。平时肝脏疾病方面所说的传染是指病毒性肝炎的传染，多指乙肝及丙肝。如乙型肝炎可以通过母婴、血液、性交等方式传播。
乙肝变为肝癌还具有传染性吗？	肝癌疾病本身并不具备传染性。传染必须具备三个条件：传染源、传播途径及易感染人群。首先癌细胞并不是传染源，它只能在患者的体内进行扩散，不能自发对患者以外的人体进行传染，因此，能够形成传染的第一条途径就已经不完整了，故传染无法形成。因此，与肝癌患者进行日常接触如共同用餐、拥抱等不会造成传染。肝癌也不会通过空气、唾液、腹水及性生活传染其他人。同理，肝硬化也不会感染他人。平时肝脏疾病方面所说的传染是指病毒性肝炎的传染，多指乙肝及丙肝。如乙型肝炎可以通过母婴、血液、性交等方式传播。
原发性肝癌会进行传染吗	肝癌疾病本身并不具备传染性。传染必须具备三个条件：传染源、传播途径及易感染人群。首先癌细胞并不是传染源，它只能在患者的体内进行扩散，不能自发对患者以外的人体进行传染，因此，能够形成传染的第一条途径就已经不完整了，故传染无法形成。因此，与肝癌患者进行日常接触如共同用餐、拥抱等不会造成传染。肝癌也不会通过空气、唾液、腹水及性生活传染其他人。同理，肝硬化也不会感染他人。平时肝脏疾病方面所说的传染是指病毒性肝炎的传染，多指乙肝及丙肝。如乙型肝炎可以通过母婴、血液、性交等方式传播。
弥漫性肝癌晚期传染吗？	肝癌疾病本身并不具备传染性。传染必须具备三个条件：传染源、传播途径及易感染人群。首先癌细胞并不是传染源，它只能在患者的体内进行扩散，不能自发对患者以外的人体进行传染，因此，能够形成传染的第一条途径就已经不完整了，故传染无法形成。因此，与肝癌患者进行日常接触如共同用餐、拥抱等不会造成传染。肝癌也不会通过空气、唾液、腹水及性生活传染其他人。同理，肝硬化也不会感染他人。平时肝脏疾病方面所说的传染是指病毒性肝炎的传染，多指乙肝及丙肝。如乙型肝炎可以通过母婴、血液、性交等方式传播。
肝癌病患者可以探视吗？会不会通过空气传染？	肝癌疾病本身并不具备传染性。传染必须具备三个条件：传染源、传播途径及易感染人群。首先癌细胞并不是传染源，它只能在患者的体内进行扩散，不能自发对患者以外的人体进行传染，因此，能够形成传染的第一条途径就已经不完整了，故传染无法形成。因此，与肝癌患者进行日常接触如共同用餐、拥抱等不会造成传染。肝癌也不会通过空气、唾液、腹水及性生活传染其他人。同理，肝硬化也不会感染他人。平时肝脏疾病方面所说的传染是指病毒性肝炎的传染，多指乙肝及丙肝。如乙型肝炎可以通过母婴、血液、性交等方式传播。
原发性肝癌传染吗？	肝癌疾病本身并不具备传染性。传染必须具备三个条件：传染源、传播途径及易感染人群。首先癌细胞并不是传染源，它只能在患者的体内进行扩散，不能自发对患者以外的人体进行传染，因此，能够形成传染的第一条途径就已经不完整了，故传染无法形成。因此，与肝癌患者进行日常接触如共同用餐、拥抱等不会造成传染。肝癌也不会通过空气、唾液、腹水及性生活传染其他人。同理，肝硬化也不会感染他人。平时肝脏疾病方面所说的传染是指病毒性肝炎的传染，多指乙肝及丙肝。如乙型肝炎可以通过母婴、血液、性交等方式传播。
肝癌会传染吗？	肝癌疾病本身并不具备传染性。传染必须具备三个条件：传染源、传播途径及易感染人群。首先癌细胞并不是传染源，它只能在患者的体内进行扩散，不能自发对患者以外的人体进行传染，因此，能够形成传染的第一条途径就已经不完整了，故传染无法形成。因此，与肝癌患者进行日常接触如共同用餐、拥抱等不会造成传染。肝癌也不会通过空气、唾液、腹水及性生活传染其他人。同理，肝硬化也不会感染他人。平时肝脏疾病方面所说的传染是指病毒性肝炎的传染，多指乙肝及丙肝。如乙型肝炎可以通过母婴、血液、性交等方式传播。
继发性肝癌传染吗？	肝癌疾病本身并不具备传染性。传染必须具备三个条件：传染源、传播途径及易感染人群。首先癌细胞并不是传染源，它只能在患者的体内进行扩散，不能自发对患者以外的人体进行传染，因此，能够形成传染的第一条途径就已经不完整了，故传染无法形成。因此，与肝癌患者进行日常接触如共同用餐、拥抱等不会造成传染。肝癌也不会通过空气、唾液、腹水及性生活传染其他人。同理，肝硬化也不会感染他人。平时肝脏疾病方面所说的传染是指病毒性肝炎的传染，多指乙肝及丙肝。如乙型肝炎可以通过母婴、血液、性交等方式传播。
肝癌黄疸传染吗？	肝癌疾病本身并不具备传染性。传染必须具备三个条件：传染源、传播途径及易感染人群。首先癌细胞并不是传染源，它只能在患者的体内进行扩散，不能自发对患者以外的人体进行传染，因此，能够形成传染的第一条途径就已经不完整了，故传染无法形成。因此，与肝癌患者进行日常接触如共同用餐、拥抱等不会造成传染。肝癌也不会通过空气、唾液、腹水及性生活传染其他人。同理，肝硬化也不会感染他人。平时肝脏疾病方面所说的传染是指病毒性肝炎的传染，多指乙肝及丙肝。如乙型肝炎可以通过母婴、血液、性交等方式传播。
原发性肝癌传染吗？	肝癌疾病本身并不具备传染性。传染必须具备三个条件：传染源、传播途径及易感染人群。首先癌细胞并不是传染源，它只能在患者的体内进行扩散，不能自发对患者以外的人体进行传染，因此，能够形成传染的第一条途径就已经不完整了，故传染无法形成。因此，与肝癌患者进行日常接触如共同用餐、拥抱等不会造成传染。肝癌也不会通过空气、唾液、腹水及性生活传染其他人。同理，肝硬化也不会感染他人。平时肝脏疾病方面所说的传染是指病毒性肝炎的传染，多指乙肝及丙肝。如乙型肝炎可以通过母婴、血液、性交等方式传播。
我爸肝癌我是乙肝病毒携带者癌细胞扩散了还会传染我吗	肝癌疾病本身并不具备传染性。传染必须具备三个条件：传染源、传播途径及易感染人群。首先癌细胞并不是传染源，它只能在患者的体内进行扩散，不能自发对患者以外的人体进行传染，因此，能够形成传染的第一条途径就已经不完整了，故传染无法形成。因此，与肝癌患者进行日常接触如共同用餐、拥抱等不会造成传染。肝癌也不会通过空气、唾液、腹水及性生活传染其他人。同理，肝硬化也不会感染他人。平时肝脏疾病方面所说的传染是指病毒性肝炎的传染，多指乙肝及丙肝。如乙型肝炎可以通过母婴、血液、性交等方式传播。
乙肝引起的肝癌传染吗？	肝癌疾病本身并不具备传染性。传染必须具备三个条件：传染源、传播途径及易感染人群。首先癌细胞并不是传染源，它只能在患者的体内进行扩散，不能自发对患者以外的人体进行传染，因此，能够形成传染的第一条途径就已经不完整了，故传染无法形成。因此，与肝癌患者进行日常接触如共同用餐、拥抱等不会造成传染。肝癌也不会通过空气、唾液、腹水及性生活传染其他人。同理，肝硬化也不会感染他人。平时肝脏疾病方面所说的传染是指病毒性肝炎的传染，多指乙肝及丙肝。如乙型肝炎可以通过母婴、血液、性交等方式传播。
肝炎引起的肝癌会传染吗？	肝癌疾病本身并不具备传染性。传染必须具备三个条件：传染源、传播途径及易感染人群。首先癌细胞并不是传染源，它只能在患者的体内进行扩散，不能自发对患者以外的人体进行传染，因此，能够形成传染的第一条途径就已经不完整了，故传染无法形成。因此，与肝癌患者进行日常接触如共同用餐、拥抱等不会造成传染。肝癌也不会通过空气、唾液、腹水及性生活传染其他人。同理，肝硬化也不会感染他人。平时肝脏疾病方面所说的传染是指病毒性肝炎的传染，多指乙肝及丙肝。如乙型肝炎可以通过母婴、血液、性交等方式传播。
肝肿瘤会传染吗	肝癌疾病本身并不具备传染性。传染必须具备三个条件：传染源、传播途径及易感染人群。首先癌细胞并不是传染源，它只能在患者的体内进行扩散，不能自发对患者以外的人体进行传染，因此，能够形成传染的第一条途径就已经不完整了，故传染无法形成。因此，与肝癌患者进行日常接触如共同用餐、拥抱等不会造成传染。肝癌也不会通过空气、唾液、腹水及性生活传染其他人。同理，肝硬化也不会感染他人。平时肝脏疾病方面所说的传染是指病毒性肝炎的传染，多指乙肝及丙肝。如乙型肝炎可以通过母婴、血液、性交等方式传播。
肝癌晚期患者用过的餐具洗干净了，其他人用会传染吗？	肝癌疾病本身并不具备传染性。传染必须具备三个条件：传染源、传播途径及易感染人群。首先癌细胞并不是传染源，它只能在患者的体内进行扩散，不能自发对患者以外的人体进行传染，因此，能够形成传染的第一条途径就已经不完整了，故传染无法形成。因此，与肝癌患者进行日常接触如共同用餐、拥抱等不会造成传染。肝癌也不会通过空气、唾液、腹水及性生活传染其他人。同理，肝硬化也不会感染他人。平时肝脏疾病方面所说的传染是指病毒性肝炎的传染，多指乙肝及丙肝。如乙型肝炎可以通过母婴、血液、性交等方式传播。
肝癌的患者有传染性的么？	肝癌疾病本身并不具备传染性。传染必须具备三个条件：传染源、传播途径及易感染人群。首先癌细胞并不是传染源，它只能在患者的体内进行扩散，不能自发对患者以外的人体进行传染，因此，能够形成传染的第一条途径就已经不完整了，故传染无法形成。因此，与肝癌患者进行日常接触如共同用餐、拥抱等不会造成传染。肝癌也不会通过空气、唾液、腹水及性生活传染其他人。同理，肝硬化也不会感染他人。平时肝脏疾病方面所说的传染是指病毒性肝炎的传染，多指乙肝及丙肝。如乙型肝炎可以通过母婴、血液、性交等方式传播。
丈夫早期肝癌和妻子过了性生活妻子能被传染吗？	肝癌疾病本身并不具备传染性。传染必须具备三个条件：传染源、传播途径及易感染人群。首先癌细胞并不是传染源，它只能在患者的体内进行扩散，不能自发对患者以外的人体进行传染，因此，能够形成传染的第一条途径就已经不完整了，故传染无法形成。因此，与肝癌患者进行日常接触如共同用餐、拥抱等不会造成传染。肝癌也不会通过空气、唾液、腹水及性生活传染其他人。同理，肝硬化也不会感染他人。平时肝脏疾病方面所说的传染是指病毒性肝炎的传染，多指乙肝及丙肝。如乙型肝炎可以通过母婴、血液、性交等方式传播。
我老公是肝癌我会得肝癌吗，我们有性生活，会传染吗？	肝癌疾病本身并不具备传染性。传染必须具备三个条件：传染源、传播途径及易感染人群。首先癌细胞并不是传染源，它只能在患者的体内进行扩散，不能自发对患者以外的人体进行传染，因此，能够形成传染的第一条途径就已经不完整了，故传染无法形成。因此，与肝癌患者进行日常接触如共同用餐、拥抱等不会造成传染。肝癌也不会通过空气、唾液、腹水及性生活传染其他人。同理，肝硬化也不会感染他人。平时肝脏疾病方面所说的传染是指病毒性肝炎的传染，多指乙肝及丙肝。如乙型肝炎可以通过母婴、血液、性交等方式传播。
我公公得肝癌了，我家人会传染吗？好害怕	肝癌疾病本身并不具备传染性。传染必须具备三个条件：传染源、传播途径及易感染人群。首先癌细胞并不是传染源，它只能在患者的体内进行扩散，不能自发对患者以外的人体进行传染，因此，能够形成传染的第一条途径就已经不完整了，故传染无法形成。因此，与肝癌患者进行日常接触如共同用餐、拥抱等不会造成传染。肝癌也不会通过空气、唾液、腹水及性生活传染其他人。同理，肝硬化也不会感染他人。平时肝脏疾病方面所说的传染是指病毒性肝炎的传染，多指乙肝及丙肝。如乙型肝炎可以通过母婴、血液、性交等方式传播。
我老公是肝癌我会得肝癌吗，我们有性生活，会传染吗？	肝癌疾病本身并不具备传染性。传染必须具备三个条件：传染源、传播途径及易感染人群。首先癌细胞并不是传染源，它只能在患者的体内进行扩散，不能自发对患者以外的人体进行传染，因此，能够形成传染的第一条途径就已经不完整了，故传染无法形成。因此，与肝癌患者进行日常接触如共同用餐、拥抱等不会造成传染。肝癌也不会通过空气、唾液、腹水及性生活传染其他人。同理，肝硬化也不会感染他人。平时肝脏疾病方面所说的传染是指病毒性肝炎的传染，多指乙肝及丙肝。如乙型肝炎可以通过母婴、血液、性交等方式传播。
我老婆有肝硬化及原发性肝癌，和她有性生活会传染吗	肝癌疾病本身并不具备传染性。传染必须具备三个条件：传染源、传播途径及易感染人群。首先癌细胞并不是传染源，它只能在患者的体内进行扩散，不能自发对患者以外的人体进行传染，因此，能够形成传染的第一条途径就已经不完整了，故传染无法形成。因此，与肝癌患者进行日常接触如共同用餐、拥抱等不会造成传染。肝癌也不会通过空气、唾液、腹水及性生活传染其他人。同理，肝硬化也不会感染他人。平时肝脏疾病方面所说的传染是指病毒性肝炎的传染，多指乙肝及丙肝。如乙型肝炎可以通过母婴、血液、性交等方式传播。
我家有一肝癌病人，我们该注意什么？晚期会传染吗？	肝癌疾病本身并不具备传染性。传染必须具备三个条件：传染源、传播途径及易感染人群。首先癌细胞并不是传染源，它只能在患者的体内进行扩散，不能自发对患者以外的人体进行传染，因此，能够形成传染的第一条途径就已经不完整了，故传染无法形成。因此，与肝癌患者进行日常接触如共同用餐、拥抱等不会造成传染。肝癌也不会通过空气、唾液、腹水及性生活传染其他人。同理，肝硬化也不会感染他人。平时肝脏疾病方面所说的传染是指病毒性肝炎的传染，多指乙肝及丙肝。如乙型肝炎可以通过母婴、血液、性交等方式传播。
我老婆有肝硬化及原发性肝癌，和她有性生活会传染吗	肝癌疾病本身并不具备传染性。传染必须具备三个条件：传染源、传播途径及易感染人群。首先癌细胞并不是传染源，它只能在患者的体内进行扩散，不能自发对患者以外的人体进行传染，因此，能够形成传染的第一条途径就已经不完整了，故传染无法形成。因此，与肝癌患者进行日常接触如共同用餐、拥抱等不会造成传染。肝癌也不会通过空气、唾液、腹水及性生活传染其他人。同理，肝硬化也不会感染他人。平时肝脏疾病方面所说的传染是指病毒性肝炎的传染，多指乙肝及丙肝。如乙型肝炎可以通过母婴、血液、性交等方式传播。
肝癌并黄疸指数高会传染吗	肝癌疾病本身并不具备传染性，与胆红素指标高与不高无关。传染必须具备三个条件：传染源、传播途径及易感染人群。首先癌细胞并不是传染源，它只能在患者的体内进行扩散，不能自发对患者以外的人体进行传染，因此，能够形成传染的第一条途径就已经不完整了，故传染无法形成。因此，与肝癌患者进行日常接触如共同用餐、拥抱等不会造成传染。肝癌也不会通过空气、唾液、腹水及性生活传染其他人。同理，肝硬化也不会感染他人。平时肝脏疾病方面所说的传染是指病毒性肝炎的传染，多指乙肝及丙肝。如乙型肝炎可以通过母婴、血液、性交等方式传播。
肝癌晚期患者的血会传染吗？	肝癌不会通过血液接触传染。但由于肝癌患者多有乙肝或丙肝病史，如果有伤口接触到病人血液，可立即至正规医疗机构注射免疫球蛋白预防肝炎的传染（病人有肝炎的情况下），并于6周、3个月、6个月后抽血化验肝炎相关指标。
我想问一下肝癌患者最终吐的血会传染吗？	肝癌不会通过血液接触传染。但由于肝癌患者多有乙肝或丙肝病史，如果有伤口接触到病人血液，可立即至正规医疗机构注射免疫球蛋白预防肝炎的传染（病人有肝炎的情况下），并于6周、3个月、7个月后抽血化验肝炎相关指标。
肝癌血液会传染吗？	肝癌不会通过血液接触传染。但由于肝癌患者多有乙肝或丙肝病史，如果有伤口接触到病人血液，可立即至正规医疗机构注射免疫球蛋白预防肝炎的传染（病人有肝炎的情况下），并于6周、3个月、8个月后抽血化验肝炎相关指标。
我昨天不小心被肝癌病人拔掉的针头扎到手，会传染吗？	肝癌不会通过血液接触传染。但由于肝癌患者多有乙肝或丙肝病史，如果有伤口接触到病人血液，可立即至正规医疗机构注射免疫球蛋白预防肝炎的传染（病人有肝炎的情况下），并于6周、3个月、9个月后抽血化验肝炎相关指标。
父亲肝癌，会遗传女儿吗	肝癌不是遗传病，亲代得肝癌并不会遗传给子代。但肝癌与遗传有关，家族性很明显。原因可能是这些高癌症家族人群的某些遗传物质稳定性比较差， 当接触某些致癌物质后， 较容易发生突变而形成癌症，这种现象称为遗传易感性。也可能和乙肝的垂直传播有关。肝癌家族倾向无法改变，但有肝癌家族史者，可提前做好预防工作， 定期检查、规范治疗，阻止或延缓肝癌发生。
母亲肝癌会遗传女儿吗？	肝癌不是遗传病，亲代得肝癌并不会遗传给子代。但肝癌与遗传有关，家族性很明显。原因可能是这些高癌症家族人群的某些遗传物质稳定性比较差， 当接触某些致癌物质后， 较容易发生突变而形成癌症，这种现象称为遗传易感性。也可能和乙肝的垂直传播有关。肝癌家族倾向无法改变，但有肝癌家族史者，可提前做好预防工作， 定期检查、规范治疗，阻止或延缓肝癌发生。
父亲肝癌会遗传儿子吗?	肝癌不是遗传病，亲代得肝癌并不会遗传给子代。但肝癌与遗传有关，家族性很明显。原因可能是这些高癌症家族人群的某些遗传物质稳定性比较差， 当接触某些致癌物质后， 较容易发生突变而形成癌症，这种现象称为遗传易感性。也可能和乙肝的垂直传播有关。肝癌家族倾向无法改变，但有肝癌家族史者，可提前做好预防工作， 定期检查、规范治疗，阻止或延缓肝癌发生。
父亲有肝癌孩子会有吗?	肝癌不是遗传病，亲代得肝癌并不会遗传给子代。但肝癌与遗传有关，家族性很明显。原因可能是这些高癌症家族人群的某些遗传物质稳定性比较差， 当接触某些致癌物质后， 较容易发生突变而形成癌症，这种现象称为遗传易感性。也可能和乙肝的垂直传播有关。肝癌家族倾向无法改变，但有肝癌家族史者，可提前做好预防工作， 定期检查、规范治疗，阻止或延缓肝癌发生。
肝癌会不会遗传给下一代？	肝癌不是遗传病，亲代得肝癌并不会遗传给子代。但肝癌与遗传有关，家族性很明显。原因可能是这些高癌症家族人群的某些遗传物质稳定性比较差， 当接触某些致癌物质后， 较容易发生突变而形成癌症，这种现象称为遗传易感性。也可能和乙肝的垂直传播有关。肝癌家族倾向无法改变，但有肝癌家族史者，可提前做好预防工作， 定期检查、规范治疗，阻止或延缓肝癌发生。
肝癌的遗传概率	肝癌不是遗传病，亲代得肝癌并不会遗传给子代。但肝癌与遗传有关，家族性很明显。原因可能是这些高癌症家族人群的某些遗传物质稳定性比较差， 当接触某些致癌物质后， 较容易发生突变而形成癌症，这种现象称为遗传易感性。也可能和乙肝的垂直传播有关。肝癌家族倾向无法改变，但有肝癌家族史者，可提前做好预防工作， 定期检查、规范治疗，阻止或延缓肝癌发生。
一般肝癌会遗传吗？	肝癌不是遗传病，亲代得肝癌并不会遗传给子代。但肝癌与遗传有关，家族性很明显。原因可能是这些高癌症家族人群的某些遗传物质稳定性比较差， 当接触某些致癌物质后， 较容易发生突变而形成癌症，这种现象称为遗传易感性。也可能和乙肝的垂直传播有关。肝癌家族倾向无法改变，但有肝癌家族史者，可提前做好预防工作， 定期检查、规范治疗，阻止或延缓肝癌发生。
患上了肝癌病的患者可以过性生活的吗？	现无临床证据表明肝癌患者不可以进行性生活，也无明确指南提示术后多久可以开始性生活。但进行性生活应综合考虑患者的身体状况和精神状态，适当进行，且注意频率和活动量都不能过大。如果患者患有病毒性肝炎还应做好保护措施，减少配偶感染肝炎的概率。
肝癌手术后多久能过性生活?	现无临床证据表明肝癌患者不可以进行性生活，也无明确指南提示术后多久可以开始性生活。但进行性生活应综合考虑患者的身体状况和精神状态，适当进行，且注意频率和活动量都不能过大。如果患者患有病毒性肝炎还应做好保护措施，减少配偶感染肝炎的概率。
肝癌手术后彩超显示很好能同房吗？	现无临床证据表明肝癌患者不可以进行性生活，也无明确指南提示术后多久可以开始性生活。但进行性生活应综合考虑患者的身体状况和精神状态，适当进行，且注意频率和活动量都不能过大。如果患者患有病毒性肝炎还应做好保护措施，减少配偶感染肝炎的概率。
肝癌手术后多久能性生活？	现无临床证据表明肝癌患者不可以进行性生活，也无明确指南提示术后多久可以开始性生活。但进行性生活应综合考虑患者的身体状况和精神状态，适当进行，且注意频率和活动量都不能过大。如果患者患有病毒性肝炎还应做好保护措施，减少配偶感染肝炎的概率。
肝癌晚期患者可以接吻过性生活吗	现无临床证据表明肝癌患者不可以进行性生活，也无明确指南提示术后多久可以开始性生活。但进行性生活应综合考虑患者的身体状况和精神状态，适当进行，且注意频率和活动量都不能过大。如果患者患有病毒性肝炎还应做好保护措施，减少配偶感染肝炎的概率。
我是一个肝癌患者，可以过性生活吗	现无临床证据表明肝癌患者不可以进行性生活，也无明确指南提示术后多久可以开始性生活。但进行性生活应综合考虑患者的身体状况和精神状态，适当进行，且注意频率和活动量都不能过大。如果患者患有病毒性肝炎还应做好保护措施，减少配偶感染肝炎的概率。
我是一肝癌切除患者，恢复后能过性生活吗	现无临床证据表明肝癌患者不可以进行性生活，也无明确指南提示术后多久可以开始性生活。但进行性生活应综合考虑患者的身体状况和精神状态，适当进行，且注意频率和活动量都不能过大。如果患者患有病毒性肝炎还应做好保护措施，减少配偶感染肝炎的概率。
肝癌晚期病人适宜做汗蒸吗？	肝癌患者在日常生活中应注意：1、避免情绪波动，保持乐观的精神状态，应尽量避免或减少引起情绪波动的各种刺激活动；2、避免过度劳累：过度的脑力或体力劳动不仅可使肝癌患者机体的抵抗力降低，促使癌症的复发或转移，而且可加重肝功损害，导致病情恶化；3、戒除不良的生活方式或习惯：忌烟忌酒，不吃霉变的粮食，少吃腌制肉制品等；4、作息规律，适当活动，有能力者适当体育锻炼，营养饮食。根据自身的病情及身体情况适当做正常的日常活动，一般无明确禁忌，如乘坐汽车、高铁、飞机、泡脚、足疗、按摩、散步都可以。
得了肝癌能大量运动吗	肝癌患者在日常生活中应注意：1、避免情绪波动，保持乐观的精神状态，应尽量避免或减少引起情绪波动的各种刺激活动；2、避免过度劳累：过度的脑力或体力劳动不仅可使肝癌患者机体的抵抗力降低，促使癌症的复发或转移，而且可加重肝功损害，导致病情恶化；3、戒除不良的生活方式或习惯：忌烟忌酒，不吃霉变的粮食，少吃腌制肉制品等；5、作息规律，适当活动，有能力者适当体育锻炼，营养饮食。根据自身的病情及身体情况适当做正常的日常活动，一般无明确禁忌，如乘坐汽车、高铁、飞机、泡脚、足疗、按摩、散步都可以。
肝癌晚期患者可以坐足疗么	肝癌患者在日常生活中应注意：1、避免情绪波动，保持乐观的精神状态，应尽量避免或减少引起情绪波动的各种刺激活动；2、避免过度劳累：过度的脑力或体力劳动不仅可使肝癌患者机体的抵抗力降低，促使癌症的复发或转移，而且可加重肝功损害，导致病情恶化；3、戒除不良的生活方式或习惯：忌烟忌酒，不吃霉变的粮食，少吃腌制肉制品等；6、作息规律，适当活动，有能力者适当体育锻炼，营养饮食。根据自身的病情及身体情况适当做正常的日常活动，一般无明确禁忌，如乘坐汽车、高铁、飞机、泡脚、足疗、按摩、散步都可以。
肝癌患者可以吸烟吗？	肝癌患者在日常生活中应注意：1、避免情绪波动，保持乐观的精神状态，应尽量避免或减少引起情绪波动的各种刺激活动；2、避免过度劳累：过度的脑力或体力劳动不仅可使肝癌患者机体的抵抗力降低，促使癌症的复发或转移，而且可加重肝功损害，导致病情恶化；3、戒除不良的生活方式或习惯：忌烟忌酒，不吃霉变的粮食，少吃腌制肉制品等；7、作息规律，适当活动，有能力者适当体育锻炼，营养饮食。根据自身的病情及身体情况适当做正常的日常活动，一般无明确禁忌，如乘坐汽车、高铁、飞机、泡脚、足疗、按摩、散步都可以。
肝癌.可以抽烟吗？	肝癌患者在日常生活中应注意：1、避免情绪波动，保持乐观的精神状态，应尽量避免或减少引起情绪波动的各种刺激活动；2、避免过度劳累：过度的脑力或体力劳动不仅可使肝癌患者机体的抵抗力降低，促使癌症的复发或转移，而且可加重肝功损害，导致病情恶化；3、戒除不良的生活方式或习惯：忌烟忌酒，不吃霉变的粮食，少吃腌制肉制品等；8、作息规律，适当活动，有能力者适当体育锻炼，营养饮食。根据自身的病情及身体情况适当做正常的日常活动，一般无明确禁忌，如乘坐汽车、高铁、飞机、泡脚、足疗、按摩、散步都可以。
肝癌患者可以走动吗，散步可以吗？	肝癌患者在日常生活中应注意：1、避免情绪波动，保持乐观的精神状态，应尽量避免或减少引起情绪波动的各种刺激活动；2、避免过度劳累：过度的脑力或体力劳动不仅可使肝癌患者机体的抵抗力降低，促使癌症的复发或转移，而且可加重肝功损害，导致病情恶化；3、戒除不良的生活方式或习惯：忌烟忌酒，不吃霉变的粮食，少吃腌制肉制品等；9、作息规律，适当活动，有能力者适当体育锻炼，营养饮食。根据自身的病情及身体情况适当做正常的日常活动，一般无明确禁忌，如乘坐汽车、高铁、飞机、泡脚、足疗、按摩、散步都可以。
肝癌可以运动吗？	肝癌患者在日常生活中应注意：1、避免情绪波动，保持乐观的精神状态，应尽量避免或减少引起情绪波动的各种刺激活动；2、避免过度劳累：过度的脑力或体力劳动不仅可使肝癌患者机体的抵抗力降低，促使癌症的复发或转移，而且可加重肝功损害，导致病情恶化；3、戒除不良的生活方式或习惯：忌烟忌酒，不吃霉变的粮食，少吃腌制肉制品等；10、作息规律，适当活动，有能力者适当体育锻炼，营养饮食。根据自身的病情及身体情况适当做正常的日常活动，一般无明确禁忌，如乘坐汽车、高铁、飞机、泡脚、足疗、按摩、散步都可以。
肝癌可以按摩吗	肝癌患者在日常生活中应注意：1、避免情绪波动，保持乐观的精神状态，应尽量避免或减少引起情绪波动的各种刺激活动；2、避免过度劳累：过度的脑力或体力劳动不仅可使肝癌患者机体的抵抗力降低，促使癌症的复发或转移，而且可加重肝功损害，导致病情恶化；3、戒除不良的生活方式或习惯：忌烟忌酒，不吃霉变的粮食，少吃腌制肉制品等；11、作息规律，适当活动，有能力者适当体育锻炼，营养饮食。根据自身的病情及身体情况适当做正常的日常活动，一般无明确禁忌，如乘坐汽车、高铁、飞机、泡脚、足疗、按摩、散步都可以。
得了肝癌，是该静养还是多运动？	肝癌患者在日常生活中应注意：1、避免情绪波动，保持乐观的精神状态，应尽量避免或减少引起情绪波动的各种刺激活动；2、避免过度劳累：过度的脑力或体力劳动不仅可使肝癌患者机体的抵抗力降低，促使癌症的复发或转移，而且可加重肝功损害，导致病情恶化；3、戒除不良的生活方式或习惯：忌烟忌酒，不吃霉变的粮食，少吃腌制肉制品等；12、作息规律，适当活动，有能力者适当体育锻炼，营养饮食。根据自身的病情及身体情况适当做正常的日常活动，一般无明确禁忌，如乘坐汽车、高铁、飞机、泡脚、足疗、按摩、散步都可以。
我父亲是肝癌已经做了手术，术后怎么保养	肝癌患者在日常生活中应注意：1、避免情绪波动，保持乐观的精神状态，应尽量避免或减少引起情绪波动的各种刺激活动；2、避免过度劳累：过度的脑力或体力劳动不仅可使肝癌患者机体的抵抗力降低，促使癌症的复发或转移，而且可加重肝功损害，导致病情恶化；3、戒除不良的生活方式或习惯：忌烟忌酒，不吃霉变的粮食，少吃腌制肉制品等；13、作息规律，适当活动，有能力者适当体育锻炼，营养饮食。根据自身的病情及身体情况适当做正常的日常活动，一般无明确禁忌，如乘坐汽车、高铁、飞机、泡脚、足疗、按摩、散步都可以。
肝癌和抽烟有关吗	香烟已经被证明与多种癌症的发病有关，其中也包括肝癌。其机制可能与香烟中的有害物质进入到血液需要肝脏代谢，增加肝脏的负荷，同时损伤遗传物质的稳定性，增加遗传易感性有关，会导致肝癌的发病率增加。
得了肝癌晚期，心里难受怎么办。	患者在得知病情后存在低落难过的情绪是可以理解的，但应注意调节，尽量避免情绪严重波动，保持积极的精神状态。如自我调节困难，建议至正规医院心理科就诊，由心理科专科医生进行心理辅导。
得了肝癌和肝硬化的话，女人还会来例假吗？	目前无证据支持肝癌与肝硬化会直接对女性例假有明显影响。如例假规律突然被打乱，建议至正规医院妇产科就诊，排除妇科疾病及肝癌盆腔转移等其他原因的可能。
我想知道肝癌病人感冒了可以吃感冒药吗	感冒是上呼吸道感染性疾病，肝癌的患者出现感冒，和普通人感冒的处理原则及所服药物并无明显不同。但应注意患者抵抗力及肝脏代谢能力较差，故具体用药种类及剂量建议至正规医院呼吸内科门诊就诊。
肝癌挂号挂哪科	肝癌可以根据患者不同的病情相应选择外科或内科治疗方法，一般首选的方法是外科治疗。可以先选择正规医院外科就诊，医生会根据患者情况最后制定相应的外科或内科治疗计划。
肝癌看内科还是外科	肝癌可以根据患者不同的病情相应选择外科或内科治疗方法，一般首选的方法是外科治疗。可以先选择正规医院外科就诊，医生会根据患者情况最后制定相应的外科或内科治疗计划。
肝癌病人能吃龙眼吗？	肝癌患者在饮食方面应尽量避免发霉变质、油腻、煎炸、烟熏、腌制、辛辣刺激、过于坚硬易划伤消化道等食物的摄取，其他无明确的禁忌，日常食物均可食用。在饮食方面可注意以下几点：1、满足热量需求，均衡膳食：恶性肿瘤是消耗性疾病，热量充足可以减少体内蛋白质的消耗，均衡膳食可以补充营养，增强体质；2、多食低脂和富含蛋白质的食物如瘦肉、鱼、禽蛋、奶制品、豆制品。注意在肝癌晚期肝功能明显异常时，要控制蛋白质的摄入，以免过多进食蛋白质诱发肝性脑病；3、多食富含维生素和膳食纤维的食物，主要见于各种水果和新鲜蔬菜，可起到辅助抗肿瘤作用。4、中药方面的食物应咨询正规中医科医生在其指导下服用。合理均衡的饮食对改善患者的预后有益。具体细则建议就诊于正规医院营养科，制定合理的膳食方案。
肝癌患者可以吃鱼吗？	肝癌患者在饮食方面应尽量避免发霉变质、油腻、煎炸、烟熏、腌制、辛辣刺激、过于坚硬易划伤消化道等食物的摄取，其他无明确的禁忌，日常食物均可食用。在饮食方面可注意以下几点：1、满足热量需求，均衡膳食：恶性肿瘤是消耗性疾病，热量充足可以减少体内蛋白质的消耗，均衡膳食可以补充营养，增强体质；2、多食低脂和富含蛋白质的食物如瘦肉、鱼、禽蛋、奶制品、豆制品。注意在肝癌晚期肝功能明显异常时，要控制蛋白质的摄入，以免过多进食蛋白质诱发肝性脑病；3、多食富含维生素和膳食纤维的食物，主要见于各种水果和新鲜蔬菜，可起到辅助抗肿瘤作用。4、中药方面的食物应咨询正规中医科医生在其指导下服用。合理均衡的饮食对改善患者的预后有益。具体细则建议就诊于正规医院营养科，制定合理的膳食方案。
肝癌病人可以吃鸭血吗	肝癌患者在饮食方面应尽量避免发霉变质、油腻、煎炸、烟熏、腌制、辛辣刺激、过于坚硬易划伤消化道等食物的摄取，其他无明确的禁忌，日常食物均可食用。在饮食方面可注意以下几点：1、满足热量需求，均衡膳食：恶性肿瘤是消耗性疾病，热量充足可以减少体内蛋白质的消耗，均衡膳食可以补充营养，增强体质；2、多食低脂和富含蛋白质的食物如瘦肉、鱼、禽蛋、奶制品、豆制品。注意在肝癌晚期肝功能明显异常时，要控制蛋白质的摄入，以免过多进食蛋白质诱发肝性脑病；3、多食富含维生素和膳食纤维的食物，主要见于各种水果和新鲜蔬菜，可起到辅助抗肿瘤作用。4、中药方面的食物应咨询正规中医科医生在其指导下服用。合理均衡的饮食对改善患者的预后有益。具体细则建议就诊于正规医院营养科，制定合理的膳食方案。
肝癌病人能喝蜂蜜吗？	肝癌患者在饮食方面应尽量避免发霉变质、油腻、煎炸、烟熏、腌制、辛辣刺激、过于坚硬易划伤消化道等食物的摄取，其他无明确的禁忌，日常食物均可食用。在饮食方面可注意以下几点：1、满足热量需求，均衡膳食：恶性肿瘤是消耗性疾病，热量充足可以减少体内蛋白质的消耗，均衡膳食可以补充营养，增强体质；2、多食低脂和富含蛋白质的食物如瘦肉、鱼、禽蛋、奶制品、豆制品。注意在肝癌晚期肝功能明显异常时，要控制蛋白质的摄入，以免过多进食蛋白质诱发肝性脑病；3、多食富含维生素和膳食纤维的食物，主要见于各种水果和新鲜蔬菜，可起到辅助抗肿瘤作用。4、中药方面的食物应咨询正规中医科医生在其指导下服用。合理均衡的饮食对改善患者的预后有益。具体细则建议就诊于正规医院营养科，制定合理的膳食方案。
肝癌患者可以吃鸭肉吗？	肝癌患者在饮食方面应尽量避免发霉变质、油腻、煎炸、烟熏、腌制、辛辣刺激、过于坚硬易划伤消化道等食物的摄取，其他无明确的禁忌，日常食物均可食用。在饮食方面可注意以下几点：1、满足热量需求，均衡膳食：恶性肿瘤是消耗性疾病，热量充足可以减少体内蛋白质的消耗，均衡膳食可以补充营养，增强体质；2、多食低脂和富含蛋白质的食物如瘦肉、鱼、禽蛋、奶制品、豆制品。注意在肝癌晚期肝功能明显异常时，要控制蛋白质的摄入，以免过多进食蛋白质诱发肝性脑病；3、多食富含维生素和膳食纤维的食物，主要见于各种水果和新鲜蔬菜，可起到辅助抗肿瘤作用。4、中药方面的食物应咨询正规中医科医生在其指导下服用。合理均衡的饮食对改善患者的预后有益。具体细则建议就诊于正规医院营养科，制定合理的膳食方案。
肝癌病人能吃人参吗？	肝癌患者在饮食方面应尽量避免发霉变质、油腻、煎炸、烟熏、腌制、辛辣刺激、过于坚硬易划伤消化道等食物的摄取，其他无明确的禁忌，日常食物均可食用。在饮食方面可注意以下几点：1、满足热量需求，均衡膳食：恶性肿瘤是消耗性疾病，热量充足可以减少体内蛋白质的消耗，均衡膳食可以补充营养，增强体质；2、多食低脂和富含蛋白质的食物如瘦肉、鱼、禽蛋、奶制品、豆制品。注意在肝癌晚期肝功能明显异常时，要控制蛋白质的摄入，以免过多进食蛋白质诱发肝性脑病；3、多食富含维生素和膳食纤维的食物，主要见于各种水果和新鲜蔬菜，可起到辅助抗肿瘤作用。4、中药方面的食物应咨询正规中医科医生在其指导下服用。合理均衡的饮食对改善患者的预后有益。具体细则建议就诊于正规医院营养科，制定合理的膳食方案。
肝癌患者可以吃海带吗？	肝癌患者在饮食方面应尽量避免发霉变质、油腻、煎炸、烟熏、腌制、辛辣刺激、过于坚硬易划伤消化道等食物的摄取，其他无明确的禁忌，日常食物均可食用。在饮食方面可注意以下几点：1、满足热量需求，均衡膳食：恶性肿瘤是消耗性疾病，热量充足可以减少体内蛋白质的消耗，均衡膳食可以补充营养，增强体质；2、多食低脂和富含蛋白质的食物如瘦肉、鱼、禽蛋、奶制品、豆制品。注意在肝癌晚期肝功能明显异常时，要控制蛋白质的摄入，以免过多进食蛋白质诱发肝性脑病；3、多食富含维生素和膳食纤维的食物，主要见于各种水果和新鲜蔬菜，可起到辅助抗肿瘤作用。4、中药方面的食物应咨询正规中医科医生在其指导下服用。合理均衡的饮食对改善患者的预后有益。具体细则建议就诊于正规医院营养科，制定合理的膳食方案。
肝癌患者能吃虾吗？	肝癌患者在饮食方面应尽量避免发霉变质、油腻、煎炸、烟熏、腌制、辛辣刺激、过于坚硬易划伤消化道等食物的摄取，其他无明确的禁忌，日常食物均可食用。在饮食方面可注意以下几点：1、满足热量需求，均衡膳食：恶性肿瘤是消耗性疾病，热量充足可以减少体内蛋白质的消耗，均衡膳食可以补充营养，增强体质；2、多食低脂和富含蛋白质的食物如瘦肉、鱼、禽蛋、奶制品、豆制品。注意在肝癌晚期肝功能明显异常时，要控制蛋白质的摄入，以免过多进食蛋白质诱发肝性脑病；3、多食富含维生素和膳食纤维的食物，主要见于各种水果和新鲜蔬菜，可起到辅助抗肿瘤作用。4、中药方面的食物应咨询正规中医科医生在其指导下服用。合理均衡的饮食对改善患者的预后有益。具体细则建议就诊于正规医院营养科，制定合理的膳食方案。
肝癌患者能吃猪血豆腐吗	肝癌患者在饮食方面应尽量避免发霉变质、油腻、煎炸、烟熏、腌制、辛辣刺激、过于坚硬易划伤消化道等食物的摄取，其他无明确的禁忌，日常食物均可食用。在饮食方面可注意以下几点：1、满足热量需求，均衡膳食：恶性肿瘤是消耗性疾病，热量充足可以减少体内蛋白质的消耗，均衡膳食可以补充营养，增强体质；2、多食低脂和富含蛋白质的食物如瘦肉、鱼、禽蛋、奶制品、豆制品。注意在肝癌晚期肝功能明显异常时，要控制蛋白质的摄入，以免过多进食蛋白质诱发肝性脑病；3、多食富含维生素和膳食纤维的食物，主要见于各种水果和新鲜蔬菜，可起到辅助抗肿瘤作用。4、中药方面的食物应咨询正规中医科医生在其指导下服用。合理均衡的饮食对改善患者的预后有益。具体细则建议就诊于正规医院营养科，制定合理的膳食方案。
肝癌患者可以吃垂盆草吗？	肝癌患者在饮食方面应尽量避免发霉变质、油腻、煎炸、烟熏、腌制、辛辣刺激、过于坚硬易划伤消化道等食物的摄取，其他无明确的禁忌，日常食物均可食用。在饮食方面可注意以下几点：1、满足热量需求，均衡膳食：恶性肿瘤是消耗性疾病，热量充足可以减少体内蛋白质的消耗，均衡膳食可以补充营养，增强体质；2、多食低脂和富含蛋白质的食物如瘦肉、鱼、禽蛋、奶制品、豆制品。注意在肝癌晚期肝功能明显异常时，要控制蛋白质的摄入，以免过多进食蛋白质诱发肝性脑病；3、多食富含维生素和膳食纤维的食物，主要见于各种水果和新鲜蔬菜，可起到辅助抗肿瘤作用。4、中药方面的食物应咨询正规中医科医生在其指导下服用。合理均衡的饮食对改善患者的预后有益。具体细则建议就诊于正规医院营养科，制定合理的膳食方案。
肝癌病人可以喝乌鸡汤吗？	肝癌患者在饮食方面应尽量避免发霉变质、油腻、煎炸、烟熏、腌制、辛辣刺激、过于坚硬易划伤消化道等食物的摄取，其他无明确的禁忌，日常食物均可食用。在饮食方面可注意以下几点：1、满足热量需求，均衡膳食：恶性肿瘤是消耗性疾病，热量充足可以减少体内蛋白质的消耗，均衡膳食可以补充营养，增强体质；2、多食低脂和富含蛋白质的食物如瘦肉、鱼、禽蛋、奶制品、豆制品。注意在肝癌晚期肝功能明显异常时，要控制蛋白质的摄入，以免过多进食蛋白质诱发肝性脑病；3、多食富含维生素和膳食纤维的食物，主要见于各种水果和新鲜蔬菜，可起到辅助抗肿瘤作用。4、中药方面的食物应咨询正规中医科医生在其指导下服用。合理均衡的饮食对改善患者的预后有益。具体细则建议就诊于正规医院营养科，制定合理的膳食方案。
肝癌病人可以吃蛋白粉吗？	肝癌患者在饮食方面应尽量避免发霉变质、油腻、煎炸、烟熏、腌制、辛辣刺激、过于坚硬易划伤消化道等食物的摄取，其他无明确的禁忌，日常食物均可食用。在饮食方面可注意以下几点：1、满足热量需求，均衡膳食：恶性肿瘤是消耗性疾病，热量充足可以减少体内蛋白质的消耗，均衡膳食可以补充营养，增强体质；2、多食低脂和富含蛋白质的食物如瘦肉、鱼、禽蛋、奶制品、豆制品。注意在肝癌晚期肝功能明显异常时，要控制蛋白质的摄入，以免过多进食蛋白质诱发肝性脑病；3、多食富含维生素和膳食纤维的食物，主要见于各种水果和新鲜蔬菜，可起到辅助抗肿瘤作用。4、中药方面的食物应咨询正规中医科医生在其指导下服用。合理均衡的饮食对改善患者的预后有益。具体细则建议就诊于正规医院营养科，制定合理的膳食方案。
肝癌病人能吃燕窝吗？	肝癌患者在饮食方面应尽量避免发霉变质、油腻、煎炸、烟熏、腌制、辛辣刺激、过于坚硬易划伤消化道等食物的摄取，其他无明确的禁忌，日常食物均可食用。在饮食方面可注意以下几点：1、满足热量需求，均衡膳食：恶性肿瘤是消耗性疾病，热量充足可以减少体内蛋白质的消耗，均衡膳食可以补充营养，增强体质；2、多食低脂和富含蛋白质的食物如瘦肉、鱼、禽蛋、奶制品、豆制品。注意在肝癌晚期肝功能明显异常时，要控制蛋白质的摄入，以免过多进食蛋白质诱发肝性脑病；3、多食富含维生素和膳食纤维的食物，主要见于各种水果和新鲜蔬菜，可起到辅助抗肿瘤作用。4、中药方面的食物应咨询正规中医科医生在其指导下服用。合理均衡的饮食对改善患者的预后有益。具体细则建议就诊于正规医院营养科，制定合理的膳食方案。
肝癌患者能黄芪泡水吗？	肝癌患者在饮食方面应尽量避免发霉变质、油腻、煎炸、烟熏、腌制、辛辣刺激、过于坚硬易划伤消化道等食物的摄取，其他无明确的禁忌，日常食物均可食用。在饮食方面可注意以下几点：1、满足热量需求，均衡膳食：恶性肿瘤是消耗性疾病，热量充足可以减少体内蛋白质的消耗，均衡膳食可以补充营养，增强体质；2、多食低脂和富含蛋白质的食物如瘦肉、鱼、禽蛋、奶制品、豆制品。注意在肝癌晚期肝功能明显异常时，要控制蛋白质的摄入，以免过多进食蛋白质诱发肝性脑病；3、多食富含维生素和膳食纤维的食物，主要见于各种水果和新鲜蔬菜，可起到辅助抗肿瘤作用。4、中药方面的食物应咨询正规中医科医生在其指导下服用。合理均衡的饮食对改善患者的预后有益。具体细则建议就诊于正规医院营养科，制定合理的膳食方案。
肝癌患者能喝排骨汤吗？	肝癌患者在饮食方面应尽量避免发霉变质、油腻、煎炸、烟熏、腌制、辛辣刺激、过于坚硬易划伤消化道等食物的摄取，其他无明确的禁忌，日常食物均可食用。在饮食方面可注意以下几点：1、满足热量需求，均衡膳食：恶性肿瘤是消耗性疾病，热量充足可以减少体内蛋白质的消耗，均衡膳食可以补充营养，增强体质；2、多食低脂和富含蛋白质的食物如瘦肉、鱼、禽蛋、奶制品、豆制品。注意在肝癌晚期肝功能明显异常时，要控制蛋白质的摄入，以免过多进食蛋白质诱发肝性脑病；3、多食富含维生素和膳食纤维的食物，主要见于各种水果和新鲜蔬菜，可起到辅助抗肿瘤作用。4、中药方面的食物应咨询正规中医科医生在其指导下服用。合理均衡的饮食对改善患者的预后有益。具体细则建议就诊于正规医院营养科，制定合理的膳食方案。
肝癌患者不能吃公鸡吗？	肝癌患者在饮食方面应尽量避免发霉变质、油腻、煎炸、烟熏、腌制、辛辣刺激、过于坚硬易划伤消化道等食物的摄取，其他无明确的禁忌，日常食物均可食用。在饮食方面可注意以下几点：1、满足热量需求，均衡膳食：恶性肿瘤是消耗性疾病，热量充足可以减少体内蛋白质的消耗，均衡膳食可以补充营养，增强体质；2、多食低脂和富含蛋白质的食物如瘦肉、鱼、禽蛋、奶制品、豆制品。注意在肝癌晚期肝功能明显异常时，要控制蛋白质的摄入，以免过多进食蛋白质诱发肝性脑病；3、多食富含维生素和膳食纤维的食物，主要见于各种水果和新鲜蔬菜，可起到辅助抗肿瘤作用。4、中药方面的食物应咨询正规中医科医生在其指导下服用。合理均衡的饮食对改善患者的预后有益。具体细则建议就诊于正规医院营养科，制定合理的膳食方案。
肝癌患者可以吃海鲜一类吗？	肝癌患者在饮食方面应尽量避免发霉变质、油腻、煎炸、烟熏、腌制、辛辣刺激、过于坚硬易划伤消化道等食物的摄取，其他无明确的禁忌，日常食物均可食用。在饮食方面可注意以下几点：1、满足热量需求，均衡膳食：恶性肿瘤是消耗性疾病，热量充足可以减少体内蛋白质的消耗，均衡膳食可以补充营养，增强体质；2、多食低脂和富含蛋白质的食物如瘦肉、鱼、禽蛋、奶制品、豆制品。注意在肝癌晚期肝功能明显异常时，要控制蛋白质的摄入，以免过多进食蛋白质诱发肝性脑病；3、多食富含维生素和膳食纤维的食物，主要见于各种水果和新鲜蔬菜，可起到辅助抗肿瘤作用。4、中药方面的食物应咨询正规中医科医生在其指导下服用。合理均衡的饮食对改善患者的预后有益。具体细则建议就诊于正规医院营养科，制定合理的膳食方案。
肝癌病人能喝羊奶吗？	肝癌患者在饮食方面应尽量避免发霉变质、油腻、煎炸、烟熏、腌制、辛辣刺激、过于坚硬易划伤消化道等食物的摄取，其他无明确的禁忌，日常食物均可食用。在饮食方面可注意以下几点：1、满足热量需求，均衡膳食：恶性肿瘤是消耗性疾病，热量充足可以减少体内蛋白质的消耗，均衡膳食可以补充营养，增强体质；2、多食低脂和富含蛋白质的食物如瘦肉、鱼、禽蛋、奶制品、豆制品。注意在肝癌晚期肝功能明显异常时，要控制蛋白质的摄入，以免过多进食蛋白质诱发肝性脑病；3、多食富含维生素和膳食纤维的食物，主要见于各种水果和新鲜蔬菜，可起到辅助抗肿瘤作用。4、中药方面的食物应咨询正规中医科医生在其指导下服用。合理均衡的饮食对改善患者的预后有益。具体细则建议就诊于正规医院营养科，制定合理的膳食方案。
肝癌病人能吃大闸蟹吗？	肝癌患者在饮食方面应尽量避免发霉变质、油腻、煎炸、烟熏、腌制、辛辣刺激、过于坚硬易划伤消化道等食物的摄取，其他无明确的禁忌，日常食物均可食用。在饮食方面可注意以下几点：1、满足热量需求，均衡膳食：恶性肿瘤是消耗性疾病，热量充足可以减少体内蛋白质的消耗，均衡膳食可以补充营养，增强体质；2、多食低脂和富含蛋白质的食物如瘦肉、鱼、禽蛋、奶制品、豆制品。注意在肝癌晚期肝功能明显异常时，要控制蛋白质的摄入，以免过多进食蛋白质诱发肝性脑病；3、多食富含维生素和膳食纤维的食物，主要见于各种水果和新鲜蔬菜，可起到辅助抗肿瘤作用。4、中药方面的食物应咨询正规中医科医生在其指导下服用。合理均衡的饮食对改善患者的预后有益。具体细则建议就诊于正规医院营养科，制定合理的膳食方案。
肝癌患者可以吃西瓜吗？	肝癌患者在饮食方面应尽量避免发霉变质、油腻、煎炸、烟熏、腌制、辛辣刺激、过于坚硬易划伤消化道等食物的摄取，其他无明确的禁忌，日常食物均可食用。在饮食方面可注意以下几点：1、满足热量需求，均衡膳食：恶性肿瘤是消耗性疾病，热量充足可以减少体内蛋白质的消耗，均衡膳食可以补充营养，增强体质；2、多食低脂和富含蛋白质的食物如瘦肉、鱼、禽蛋、奶制品、豆制品。注意在肝癌晚期肝功能明显异常时，要控制蛋白质的摄入，以免过多进食蛋白质诱发肝性脑病；3、多食富含维生素和膳食纤维的食物，主要见于各种水果和新鲜蔬菜，可起到辅助抗肿瘤作用。4、中药方面的食物应咨询正规中医科医生在其指导下服用。合理均衡的饮食对改善患者的预后有益。具体细则建议就诊于正规医院营养科，制定合理的膳食方案。
肝癌病人能吃红枣吗？	肝癌患者在饮食方面应尽量避免发霉变质、油腻、煎炸、烟熏、腌制、辛辣刺激、过于坚硬易划伤消化道等食物的摄取，其他无明确的禁忌，日常食物均可食用。在饮食方面可注意以下几点：1、满足热量需求，均衡膳食：恶性肿瘤是消耗性疾病，热量充足可以减少体内蛋白质的消耗，均衡膳食可以补充营养，增强体质；2、多食低脂和富含蛋白质的食物如瘦肉、鱼、禽蛋、奶制品、豆制品。注意在肝癌晚期肝功能明显异常时，要控制蛋白质的摄入，以免过多进食蛋白质诱发肝性脑病；3、多食富含维生素和膳食纤维的食物，主要见于各种水果和新鲜蔬菜，可起到辅助抗肿瘤作用。4、中药方面的食物应咨询正规中医科医生在其指导下服用。合理均衡的饮食对改善患者的预后有益。具体细则建议就诊于正规医院营养科，制定合理的膳食方案。
肝癌患者可以喝点红酒吗？	肝癌患者在饮食方面应尽量避免发霉变质、油腻、煎炸、烟熏、腌制、辛辣刺激、过于坚硬易划伤消化道等食物的摄取，其他无明确的禁忌，日常食物均可食用。在饮食方面可注意以下几点：1、满足热量需求，均衡膳食：恶性肿瘤是消耗性疾病，热量充足可以减少体内蛋白质的消耗，均衡膳食可以补充营养，增强体质；2、多食低脂和富含蛋白质的食物如瘦肉、鱼、禽蛋、奶制品、豆制品。注意在肝癌晚期肝功能明显异常时，要控制蛋白质的摄入，以免过多进食蛋白质诱发肝性脑病；3、多食富含维生素和膳食纤维的食物，主要见于各种水果和新鲜蔬菜，可起到辅助抗肿瘤作用。4、中药方面的食物应咨询正规中医科医生在其指导下服用。合理均衡的饮食对改善患者的预后有益。具体细则建议就诊于正规医院营养科，制定合理的膳食方案。
肝癌患者可以喝羊肉汤吗？	肝癌患者在饮食方面应尽量避免发霉变质、油腻、煎炸、烟熏、腌制、辛辣刺激、过于坚硬易划伤消化道等食物的摄取，其他无明确的禁忌，日常食物均可食用。在饮食方面可注意以下几点：1、满足热量需求，均衡膳食：恶性肿瘤是消耗性疾病，热量充足可以减少体内蛋白质的消耗，均衡膳食可以补充营养，增强体质；2、多食低脂和富含蛋白质的食物如瘦肉、鱼、禽蛋、奶制品、豆制品。注意在肝癌晚期肝功能明显异常时，要控制蛋白质的摄入，以免过多进食蛋白质诱发肝性脑病；3、多食富含维生素和膳食纤维的食物，主要见于各种水果和新鲜蔬菜，可起到辅助抗肿瘤作用。4、中药方面的食物应咨询正规中医科医生在其指导下服用。合理均衡的饮食对改善患者的预后有益。具体细则建议就诊于正规医院营养科，制定合理的膳食方案。
肝癌患者可以吃红枣么？	肝癌患者在饮食方面应尽量避免发霉变质、油腻、煎炸、烟熏、腌制、辛辣刺激、过于坚硬易划伤消化道等食物的摄取，其他无明确的禁忌，日常食物均可食用。在饮食方面可注意以下几点：1、满足热量需求，均衡膳食：恶性肿瘤是消耗性疾病，热量充足可以减少体内蛋白质的消耗，均衡膳食可以补充营养，增强体质；2、多食低脂和富含蛋白质的食物如瘦肉、鱼、禽蛋、奶制品、豆制品。注意在肝癌晚期肝功能明显异常时，要控制蛋白质的摄入，以免过多进食蛋白质诱发肝性脑病；3、多食富含维生素和膳食纤维的食物，主要见于各种水果和新鲜蔬菜，可起到辅助抗肿瘤作用。4、中药方面的食物应咨询正规中医科医生在其指导下服用。合理均衡的饮食对改善患者的预后有益。具体细则建议就诊于正规医院营养科，制定合理的膳食方案。
肝癌患者可以吃鸽子吗？	肝癌患者在饮食方面应尽量避免发霉变质、油腻、煎炸、烟熏、腌制、辛辣刺激、过于坚硬易划伤消化道等食物的摄取，其他无明确的禁忌，日常食物均可食用。在饮食方面可注意以下几点：1、满足热量需求，均衡膳食：恶性肿瘤是消耗性疾病，热量充足可以减少体内蛋白质的消耗，均衡膳食可以补充营养，增强体质；2、多食低脂和富含蛋白质的食物如瘦肉、鱼、禽蛋、奶制品、豆制品。注意在肝癌晚期肝功能明显异常时，要控制蛋白质的摄入，以免过多进食蛋白质诱发肝性脑病；3、多食富含维生素和膳食纤维的食物，主要见于各种水果和新鲜蔬菜，可起到辅助抗肿瘤作用。4、中药方面的食物应咨询正规中医科医生在其指导下服用。合理均衡的饮食对改善患者的预后有益。具体细则建议就诊于正规医院营养科，制定合理的膳食方案。
肝癌饮食可以吃白糖吗？	肝癌患者在饮食方面应尽量避免发霉变质、油腻、煎炸、烟熏、腌制、辛辣刺激、过于坚硬易划伤消化道等食物的摄取，其他无明确的禁忌，日常食物均可食用。在饮食方面可注意以下几点：1、满足热量需求，均衡膳食：恶性肿瘤是消耗性疾病，热量充足可以减少体内蛋白质的消耗，均衡膳食可以补充营养，增强体质；2、多食低脂和富含蛋白质的食物如瘦肉、鱼、禽蛋、奶制品、豆制品。注意在肝癌晚期肝功能明显异常时，要控制蛋白质的摄入，以免过多进食蛋白质诱发肝性脑病；3、多食富含维生素和膳食纤维的食物，主要见于各种水果和新鲜蔬菜，可起到辅助抗肿瘤作用。4、中药方面的食物应咨询正规中医科医生在其指导下服用。合理均衡的饮食对改善患者的预后有益。具体细则建议就诊于正规医院营养科，制定合理的膳食方案。
肝癌患者可以吃鲫鱼么？	肝癌患者在饮食方面应尽量避免发霉变质、油腻、煎炸、烟熏、腌制、辛辣刺激、过于坚硬易划伤消化道等食物的摄取，其他无明确的禁忌，日常食物均可食用。在饮食方面可注意以下几点：1、满足热量需求，均衡膳食：恶性肿瘤是消耗性疾病，热量充足可以减少体内蛋白质的消耗，均衡膳食可以补充营养，增强体质；2、多食低脂和富含蛋白质的食物如瘦肉、鱼、禽蛋、奶制品、豆制品。注意在肝癌晚期肝功能明显异常时，要控制蛋白质的摄入，以免过多进食蛋白质诱发肝性脑病；3、多食富含维生素和膳食纤维的食物，主要见于各种水果和新鲜蔬菜，可起到辅助抗肿瘤作用。4、中药方面的食物应咨询正规中医科医生在其指导下服用。合理均衡的饮食对改善患者的预后有益。具体细则建议就诊于正规医院营养科，制定合理的膳食方案。
肝癌患者可以吃甜食吗？	肝癌患者在饮食方面应尽量避免发霉变质、油腻、煎炸、烟熏、腌制、辛辣刺激、过于坚硬易划伤消化道等食物的摄取，其他无明确的禁忌，日常食物均可食用。在饮食方面可注意以下几点：1、满足热量需求，均衡膳食：恶性肿瘤是消耗性疾病，热量充足可以减少体内蛋白质的消耗，均衡膳食可以补充营养，增强体质；2、多食低脂和富含蛋白质的食物如瘦肉、鱼、禽蛋、奶制品、豆制品。注意在肝癌晚期肝功能明显异常时，要控制蛋白质的摄入，以免过多进食蛋白质诱发肝性脑病；3、多食富含维生素和膳食纤维的食物，主要见于各种水果和新鲜蔬菜，可起到辅助抗肿瘤作用。4、中药方面的食物应咨询正规中医科医生在其指导下服用。合理均衡的饮食对改善患者的预后有益。具体细则建议就诊于正规医院营养科，制定合理的膳食方案。
肝癌患者可以吃玉米吗？	肝癌患者在饮食方面应尽量避免发霉变质、油腻、煎炸、烟熏、腌制、辛辣刺激、过于坚硬易划伤消化道等食物的摄取，其他无明确的禁忌，日常食物均可食用。在饮食方面可注意以下几点：1、满足热量需求，均衡膳食：恶性肿瘤是消耗性疾病，热量充足可以减少体内蛋白质的消耗，均衡膳食可以补充营养，增强体质；2、多食低脂和富含蛋白质的食物如瘦肉、鱼、禽蛋、奶制品、豆制品。注意在肝癌晚期肝功能明显异常时，要控制蛋白质的摄入，以免过多进食蛋白质诱发肝性脑病；3、多食富含维生素和膳食纤维的食物，主要见于各种水果和新鲜蔬菜，可起到辅助抗肿瘤作用。4、中药方面的食物应咨询正规中医科医生在其指导下服用。合理均衡的饮食对改善患者的预后有益。具体细则建议就诊于正规医院营养科，制定合理的膳食方案。
肝癌患者可以吃榴莲吗？	肝癌患者在饮食方面应尽量避免发霉变质、油腻、煎炸、烟熏、腌制、辛辣刺激、过于坚硬易划伤消化道等食物的摄取，其他无明确的禁忌，日常食物均可食用。在饮食方面可注意以下几点：1、满足热量需求，均衡膳食：恶性肿瘤是消耗性疾病，热量充足可以减少体内蛋白质的消耗，均衡膳食可以补充营养，增强体质；2、多食低脂和富含蛋白质的食物如瘦肉、鱼、禽蛋、奶制品、豆制品。注意在肝癌晚期肝功能明显异常时，要控制蛋白质的摄入，以免过多进食蛋白质诱发肝性脑病；3、多食富含维生素和膳食纤维的食物，主要见于各种水果和新鲜蔬菜，可起到辅助抗肿瘤作用。4、中药方面的食物应咨询正规中医科医生在其指导下服用。合理均衡的饮食对改善患者的预后有益。具体细则建议就诊于正规医院营养科，制定合理的膳食方案。
肝癌患者可以吃甲鱼吗？	肝癌患者在饮食方面应尽量避免发霉变质、油腻、煎炸、烟熏、腌制、辛辣刺激、过于坚硬易划伤消化道等食物的摄取，其他无明确的禁忌，日常食物均可食用。在饮食方面可注意以下几点：1、满足热量需求，均衡膳食：恶性肿瘤是消耗性疾病，热量充足可以减少体内蛋白质的消耗，均衡膳食可以补充营养，增强体质；2、多食低脂和富含蛋白质的食物如瘦肉、鱼、禽蛋、奶制品、豆制品。注意在肝癌晚期肝功能明显异常时，要控制蛋白质的摄入，以免过多进食蛋白质诱发肝性脑病；3、多食富含维生素和膳食纤维的食物，主要见于各种水果和新鲜蔬菜，可起到辅助抗肿瘤作用。4、中药方面的食物应咨询正规中医科医生在其指导下服用。合理均衡的饮食对改善患者的预后有益。具体细则建议就诊于正规医院营养科，制定合理的膳食方案。
肝癌患者能吃鸡肉吗？	肝癌患者在饮食方面应尽量避免发霉变质、油腻、煎炸、烟熏、腌制、辛辣刺激、过于坚硬易划伤消化道等食物的摄取，其他无明确的禁忌，日常食物均可食用。在饮食方面可注意以下几点：1、满足热量需求，均衡膳食：恶性肿瘤是消耗性疾病，热量充足可以减少体内蛋白质的消耗，均衡膳食可以补充营养，增强体质；2、多食低脂和富含蛋白质的食物如瘦肉、鱼、禽蛋、奶制品、豆制品。注意在肝癌晚期肝功能明显异常时，要控制蛋白质的摄入，以免过多进食蛋白质诱发肝性脑病；3、多食富含维生素和膳食纤维的食物，主要见于各种水果和新鲜蔬菜，可起到辅助抗肿瘤作用。4、中药方面的食物应咨询正规中医科医生在其指导下服用。合理均衡的饮食对改善患者的预后有益。具体细则建议就诊于正规医院营养科，制定合理的膳食方案。
肝癌病人能吃灵芝吗？	肝癌患者在饮食方面应尽量避免发霉变质、油腻、煎炸、烟熏、腌制、辛辣刺激、过于坚硬易划伤消化道等食物的摄取，其他无明确的禁忌，日常食物均可食用。在饮食方面可注意以下几点：1、满足热量需求，均衡膳食：恶性肿瘤是消耗性疾病，热量充足可以减少体内蛋白质的消耗，均衡膳食可以补充营养，增强体质；2、多食低脂和富含蛋白质的食物如瘦肉、鱼、禽蛋、奶制品、豆制品。注意在肝癌晚期肝功能明显异常时，要控制蛋白质的摄入，以免过多进食蛋白质诱发肝性脑病；3、多食富含维生素和膳食纤维的食物，主要见于各种水果和新鲜蔬菜，可起到辅助抗肿瘤作用。4、中药方面的食物应咨询正规中医科医生在其指导下服用。合理均衡的饮食对改善患者的预后有益。具体细则建议就诊于正规医院营养科，制定合理的膳食方案。
肝癌患者可以吃枸杞子吗？	肝癌患者在饮食方面应尽量避免发霉变质、油腻、煎炸、烟熏、腌制、辛辣刺激、过于坚硬易划伤消化道等食物的摄取，其他无明确的禁忌，日常食物均可食用。在饮食方面可注意以下几点：1、满足热量需求，均衡膳食：恶性肿瘤是消耗性疾病，热量充足可以减少体内蛋白质的消耗，均衡膳食可以补充营养，增强体质；2、多食低脂和富含蛋白质的食物如瘦肉、鱼、禽蛋、奶制品、豆制品。注意在肝癌晚期肝功能明显异常时，要控制蛋白质的摄入，以免过多进食蛋白质诱发肝性脑病；3、多食富含维生素和膳食纤维的食物，主要见于各种水果和新鲜蔬菜，可起到辅助抗肿瘤作用。4、中药方面的食物应咨询正规中医科医生在其指导下服用。合理均衡的饮食对改善患者的预后有益。具体细则建议就诊于正规医院营养科，制定合理的膳食方案。
肝癌能不能吃香菇啊？	肝癌患者在饮食方面应尽量避免发霉变质、油腻、煎炸、烟熏、腌制、辛辣刺激、过于坚硬易划伤消化道等食物的摄取，其他无明确的禁忌，日常食物均可食用。在饮食方面可注意以下几点：1、满足热量需求，均衡膳食：恶性肿瘤是消耗性疾病，热量充足可以减少体内蛋白质的消耗，均衡膳食可以补充营养，增强体质；2、多食低脂和富含蛋白质的食物如瘦肉、鱼、禽蛋、奶制品、豆制品。注意在肝癌晚期肝功能明显异常时，要控制蛋白质的摄入，以免过多进食蛋白质诱发肝性脑病；3、多食富含维生素和膳食纤维的食物，主要见于各种水果和新鲜蔬菜，可起到辅助抗肿瘤作用。4、中药方面的食物应咨询正规中医科医生在其指导下服用。合理均衡的饮食对改善患者的预后有益。具体细则建议就诊于正规医院营养科，制定合理的膳食方案。
肝癌病人可以吃提子吗？	肝癌患者在饮食方面应尽量避免发霉变质、油腻、煎炸、烟熏、腌制、辛辣刺激、过于坚硬易划伤消化道等食物的摄取，其他无明确的禁忌，日常食物均可食用。在饮食方面可注意以下几点：1、满足热量需求，均衡膳食：恶性肿瘤是消耗性疾病，热量充足可以减少体内蛋白质的消耗，均衡膳食可以补充营养，增强体质；2、多食低脂和富含蛋白质的食物如瘦肉、鱼、禽蛋、奶制品、豆制品。注意在肝癌晚期肝功能明显异常时，要控制蛋白质的摄入，以免过多进食蛋白质诱发肝性脑病；3、多食富含维生素和膳食纤维的食物，主要见于各种水果和新鲜蔬菜，可起到辅助抗肿瘤作用。4、中药方面的食物应咨询正规中医科医生在其指导下服用。合理均衡的饮食对改善患者的预后有益。具体细则建议就诊于正规医院营养科，制定合理的膳食方案。
肝癌病人能喝鸡汤吗？	肝癌患者在饮食方面应尽量避免发霉变质、油腻、煎炸、烟熏、腌制、辛辣刺激、过于坚硬易划伤消化道等食物的摄取，其他无明确的禁忌，日常食物均可食用。在饮食方面可注意以下几点：1、满足热量需求，均衡膳食：恶性肿瘤是消耗性疾病，热量充足可以减少体内蛋白质的消耗，均衡膳食可以补充营养，增强体质；2、多食低脂和富含蛋白质的食物如瘦肉、鱼、禽蛋、奶制品、豆制品。注意在肝癌晚期肝功能明显异常时，要控制蛋白质的摄入，以免过多进食蛋白质诱发肝性脑病；3、多食富含维生素和膳食纤维的食物，主要见于各种水果和新鲜蔬菜，可起到辅助抗肿瘤作用。4、中药方面的食物应咨询正规中医科医生在其指导下服用。合理均衡的饮食对改善患者的预后有益。具体细则建议就诊于正规医院营养科，制定合理的膳食方案。
胰腺癌患者不能吃鱼子嘛？	肝癌患者在饮食方面应尽量避免发霉变质、油腻、煎炸、烟熏、腌制、辛辣刺激、过于坚硬易划伤消化道等食物的摄取，其他无明确的禁忌，日常食物均可食用。在饮食方面可注意以下几点：1、满足热量需求，均衡膳食：恶性肿瘤是消耗性疾病，热量充足可以减少体内蛋白质的消耗，均衡膳食可以补充营养，增强体质；2、多食低脂和富含蛋白质的食物如瘦肉、鱼、禽蛋、奶制品、豆制品。注意在肝癌晚期肝功能明显异常时，要控制蛋白质的摄入，以免过多进食蛋白质诱发肝性脑病；3、多食富含维生素和膳食纤维的食物，主要见于各种水果和新鲜蔬菜，可起到辅助抗肿瘤作用。4、中药方面的食物应咨询正规中医科医生在其指导下服用。合理均衡的饮食对改善患者的预后有益。具体细则建议就诊于正规医院营养科，制定合理的膳食方案。
肝癌病人能吃海参吗？	肝癌患者在饮食方面应尽量避免发霉变质、油腻、煎炸、烟熏、腌制、辛辣刺激、过于坚硬易划伤消化道等食物的摄取，其他无明确的禁忌，日常食物均可食用。在饮食方面可注意以下几点：1、满足热量需求，均衡膳食：恶性肿瘤是消耗性疾病，热量充足可以减少体内蛋白质的消耗，均衡膳食可以补充营养，增强体质；2、多食低脂和富含蛋白质的食物如瘦肉、鱼、禽蛋、奶制品、豆制品。注意在肝癌晚期肝功能明显异常时，要控制蛋白质的摄入，以免过多进食蛋白质诱发肝性脑病；3、多食富含维生素和膳食纤维的食物，主要见于各种水果和新鲜蔬菜，可起到辅助抗肿瘤作用。4、中药方面的食物应咨询正规中医科医生在其指导下服用。合理均衡的饮食对改善患者的预后有益。具体细则建议就诊于正规医院营养科，制定合理的膳食方案。
肝癌患者可以吃虾吗？	肝癌患者在饮食方面应尽量避免发霉变质、油腻、煎炸、烟熏、腌制、辛辣刺激、过于坚硬易划伤消化道等食物的摄取，其他无明确的禁忌，日常食物均可食用。在饮食方面可注意以下几点：1、满足热量需求，均衡膳食：恶性肿瘤是消耗性疾病，热量充足可以减少体内蛋白质的消耗，均衡膳食可以补充营养，增强体质；2、多食低脂和富含蛋白质的食物如瘦肉、鱼、禽蛋、奶制品、豆制品。注意在肝癌晚期肝功能明显异常时，要控制蛋白质的摄入，以免过多进食蛋白质诱发肝性脑病；3、多食富含维生素和膳食纤维的食物，主要见于各种水果和新鲜蔬菜，可起到辅助抗肿瘤作用。4、中药方面的食物应咨询正规中医科医生在其指导下服用。合理均衡的饮食对改善患者的预后有益。具体细则建议就诊于正规医院营养科，制定合理的膳食方案。
肝癌手术后能吃茄子吗？	肝癌患者在饮食方面应尽量避免发霉变质、油腻、煎炸、烟熏、腌制、辛辣刺激、过于坚硬易划伤消化道等食物的摄取，其他无明确的禁忌，日常食物均可食用。在饮食方面可注意以下几点：1、满足热量需求，均衡膳食：恶性肿瘤是消耗性疾病，热量充足可以减少体内蛋白质的消耗，均衡膳食可以补充营养，增强体质；2、多食低脂和富含蛋白质的食物如瘦肉、鱼、禽蛋、奶制品、豆制品。注意在肝癌晚期肝功能明显异常时，要控制蛋白质的摄入，以免过多进食蛋白质诱发肝性脑病；3、多食富含维生素和膳食纤维的食物，主要见于各种水果和新鲜蔬菜，可起到辅助抗肿瘤作用。4、中药方面的食物应咨询正规中医科医生在其指导下服用。合理均衡的饮食对改善患者的预后有益。具体细则建议就诊于正规医院营养科，制定合理的膳食方案。
肝癌病人能吃豆制品吗？	肝癌患者在饮食方面应尽量避免发霉变质、油腻、煎炸、烟熏、腌制、辛辣刺激、过于坚硬易划伤消化道等食物的摄取，其他无明确的禁忌，日常食物均可食用。在饮食方面可注意以下几点：1、满足热量需求，均衡膳食：恶性肿瘤是消耗性疾病，热量充足可以减少体内蛋白质的消耗，均衡膳食可以补充营养，增强体质；2、多食低脂和富含蛋白质的食物如瘦肉、鱼、禽蛋、奶制品、豆制品。注意在肝癌晚期肝功能明显异常时，要控制蛋白质的摄入，以免过多进食蛋白质诱发肝性脑病；3、多食富含维生素和膳食纤维的食物，主要见于各种水果和新鲜蔬菜，可起到辅助抗肿瘤作用。4、中药方面的食物应咨询正规中医科医生在其指导下服用。合理均衡的饮食对改善患者的预后有益。具体细则建议就诊于正规医院营养科，制定合理的膳食方案。
肝癌患者能吃鱿鱼吗？	肝癌患者在饮食方面应尽量避免发霉变质、油腻、煎炸、烟熏、腌制、辛辣刺激、过于坚硬易划伤消化道等食物的摄取，其他无明确的禁忌，日常食物均可食用。在饮食方面可注意以下几点：1、满足热量需求，均衡膳食：恶性肿瘤是消耗性疾病，热量充足可以减少体内蛋白质的消耗，均衡膳食可以补充营养，增强体质；2、多食低脂和富含蛋白质的食物如瘦肉、鱼、禽蛋、奶制品、豆制品。注意在肝癌晚期肝功能明显异常时，要控制蛋白质的摄入，以免过多进食蛋白质诱发肝性脑病；3、多食富含维生素和膳食纤维的食物，主要见于各种水果和新鲜蔬菜，可起到辅助抗肿瘤作用。4、中药方面的食物应咨询正规中医科医生在其指导下服用。合理均衡的饮食对改善患者的预后有益。具体细则建议就诊于正规医院营养科，制定合理的膳食方案。
肝癌病人可以吃燕窝吗？	肝癌患者在饮食方面应尽量避免发霉变质、油腻、煎炸、烟熏、腌制、辛辣刺激、过于坚硬易划伤消化道等食物的摄取，其他无明确的禁忌，日常食物均可食用。在饮食方面可注意以下几点：1、满足热量需求，均衡膳食：恶性肿瘤是消耗性疾病，热量充足可以减少体内蛋白质的消耗，均衡膳食可以补充营养，增强体质；2、多食低脂和富含蛋白质的食物如瘦肉、鱼、禽蛋、奶制品、豆制品。注意在肝癌晚期肝功能明显异常时，要控制蛋白质的摄入，以免过多进食蛋白质诱发肝性脑病；3、多食富含维生素和膳食纤维的食物，主要见于各种水果和新鲜蔬菜，可起到辅助抗肿瘤作用。4、中药方面的食物应咨询正规中医科医生在其指导下服用。合理均衡的饮食对改善患者的预后有益。具体细则建议就诊于正规医院营养科，制定合理的膳食方案。
肝癌晚期吃什么东西最好	肝癌患者在饮食方面应尽量避免发霉变质、油腻、煎炸、烟熏、腌制、辛辣刺激、过于坚硬易划伤消化道等食物的摄取，其他无明确的禁忌，日常食物均可食用。在饮食方面可注意以下几点：1、满足热量需求，均衡膳食：恶性肿瘤是消耗性疾病，热量充足可以减少体内蛋白质的消耗，均衡膳食可以补充营养，增强体质；2、多食低脂和富含蛋白质的食物如瘦肉、鱼、禽蛋、奶制品、豆制品。注意在肝癌晚期肝功能明显异常时，要控制蛋白质的摄入，以免过多进食蛋白质诱发肝性脑病；3、多食富含维生素和膳食纤维的食物，主要见于各种水果和新鲜蔬菜，可起到辅助抗肿瘤作用。4、中药方面的食物应咨询正规中医科医生在其指导下服用。合理均衡的饮食对改善患者的预后有益。具体细则建议就诊于正规医院营养科，制定合理的膳食方案。
肝癌晚期有什么忌口吗？	肝癌患者在饮食方面应尽量避免发霉变质、油腻、煎炸、烟熏、腌制、辛辣刺激、过于坚硬易划伤消化道等食物的摄取，其他无明确的禁忌，日常食物均可食用。在饮食方面可注意以下几点：1、满足热量需求，均衡膳食：恶性肿瘤是消耗性疾病，热量充足可以减少体内蛋白质的消耗，均衡膳食可以补充营养，增强体质；2、多食低脂和富含蛋白质的食物如瘦肉、鱼、禽蛋、奶制品、豆制品。注意在肝癌晚期肝功能明显异常时，要控制蛋白质的摄入，以免过多进食蛋白质诱发肝性脑病；3、多食富含维生素和膳食纤维的食物，主要见于各种水果和新鲜蔬菜，可起到辅助抗肿瘤作用。4、中药方面的食物应咨询正规中医科医生在其指导下服用。合理均衡的饮食对改善患者的预后有益。具体细则建议就诊于正规医院营养科，制定合理的膳食方案。
肝癌晚期可以喝当归黄芪茶吗？	肝癌患者在饮食方面应尽量避免发霉变质、油腻、煎炸、烟熏、腌制、辛辣刺激、过于坚硬易划伤消化道等食物的摄取，其他无明确的禁忌，日常食物均可食用。在饮食方面可注意以下几点：1、满足热量需求，均衡膳食：恶性肿瘤是消耗性疾病，热量充足可以减少体内蛋白质的消耗，均衡膳食可以补充营养，增强体质；2、多食低脂和富含蛋白质的食物如瘦肉、鱼、禽蛋、奶制品、豆制品。注意在肝癌晚期肝功能明显异常时，要控制蛋白质的摄入，以免过多进食蛋白质诱发肝性脑病；3、多食富含维生素和膳食纤维的食物，主要见于各种水果和新鲜蔬菜，可起到辅助抗肿瘤作用。4、中药方面的食物应咨询正规中医科医生在其指导下服用。合理均衡的饮食对改善患者的预后有益。具体细则建议就诊于正规医院营养科，制定合理的膳食方案。
肝癌手术后能喝鲫鱼汤和大骨头汤吗	肝癌患者在饮食方面应尽量避免发霉变质、油腻、煎炸、烟熏、腌制、辛辣刺激、过于坚硬易划伤消化道等食物的摄取，其他无明确的禁忌，日常食物均可食用。在饮食方面可注意以下几点：1、满足热量需求，均衡膳食：恶性肿瘤是消耗性疾病，热量充足可以减少体内蛋白质的消耗，均衡膳食可以补充营养，增强体质；2、多食低脂和富含蛋白质的食物如瘦肉、鱼、禽蛋、奶制品、豆制品。注意在肝癌晚期肝功能明显异常时，要控制蛋白质的摄入，以免过多进食蛋白质诱发肝性脑病；3、多食富含维生素和膳食纤维的食物，主要见于各种水果和新鲜蔬菜，可起到辅助抗肿瘤作用。4、中药方面的食物应咨询正规中医科医生在其指导下服用。合理均衡的饮食对改善患者的预后有益。具体细则建议就诊于正规医院营养科，制定合理的膳食方案。
肝癌晚期不能进食可以吃奶粉吗？	肝癌患者在饮食方面应尽量避免发霉变质、油腻、煎炸、烟熏、腌制、辛辣刺激、过于坚硬易划伤消化道等食物的摄取，其他无明确的禁忌，日常食物均可食用。在饮食方面可注意以下几点：1、满足热量需求，均衡膳食：恶性肿瘤是消耗性疾病，热量充足可以减少体内蛋白质的消耗，均衡膳食可以补充营养，增强体质；2、多食低脂和富含蛋白质的食物如瘦肉、鱼、禽蛋、奶制品、豆制品。注意在肝癌晚期肝功能明显异常时，要控制蛋白质的摄入，以免过多进食蛋白质诱发肝性脑病；3、多食富含维生素和膳食纤维的食物，主要见于各种水果和新鲜蔬菜，可起到辅助抗肿瘤作用。4、中药方面的食物应咨询正规中医科医生在其指导下服用。合理均衡的饮食对改善患者的预后有益。具体细则建议就诊于正规医院营养科，制定合理的膳食方案。
肝癌晚期期，能吃阿胶吗？	肝癌患者在饮食方面应尽量避免发霉变质、油腻、煎炸、烟熏、腌制、辛辣刺激、过于坚硬易划伤消化道等食物的摄取，其他无明确的禁忌，日常食物均可食用。在饮食方面可注意以下几点：1、满足热量需求，均衡膳食：恶性肿瘤是消耗性疾病，热量充足可以减少体内蛋白质的消耗，均衡膳食可以补充营养，增强体质；2、多食低脂和富含蛋白质的食物如瘦肉、鱼、禽蛋、奶制品、豆制品。注意在肝癌晚期肝功能明显异常时，要控制蛋白质的摄入，以免过多进食蛋白质诱发肝性脑病；3、多食富含维生素和膳食纤维的食物，主要见于各种水果和新鲜蔬菜，可起到辅助抗肿瘤作用。4、中药方面的食物应咨询正规中医科医生在其指导下服用。合理均衡的饮食对改善患者的预后有益。具体细则建议就诊于正规医院营养科，制定合理的膳食方案。
肝癌晚期而且疼疯可以吃竹笋吗	肝癌患者在饮食方面应尽量避免发霉变质、油腻、煎炸、烟熏、腌制、辛辣刺激、过于坚硬易划伤消化道等食物的摄取，其他无明确的禁忌，日常食物均可食用。在饮食方面可注意以下几点：1、满足热量需求，均衡膳食：恶性肿瘤是消耗性疾病，热量充足可以减少体内蛋白质的消耗，均衡膳食可以补充营养，增强体质；2、多食低脂和富含蛋白质的食物如瘦肉、鱼、禽蛋、奶制品、豆制品。注意在肝癌晚期肝功能明显异常时，要控制蛋白质的摄入，以免过多进食蛋白质诱发肝性脑病；3、多食富含维生素和膳食纤维的食物，主要见于各种水果和新鲜蔬菜，可起到辅助抗肿瘤作用。4、中药方面的食物应咨询正规中医科医生在其指导下服用。合理均衡的饮食对改善患者的预后有益。具体细则建议就诊于正规医院营养科，制定合理的膳食方案。
肝癌病人有什么忌口?	肝癌患者在饮食方面应尽量避免发霉变质、油腻、煎炸、烟熏、腌制、辛辣刺激、过于坚硬易划伤消化道等食物的摄取，其他无明确的禁忌，日常食物均可食用。在饮食方面可注意以下几点：1、满足热量需求，均衡膳食：恶性肿瘤是消耗性疾病，热量充足可以减少体内蛋白质的消耗，均衡膳食可以补充营养，增强体质；2、多食低脂和富含蛋白质的食物如瘦肉、鱼、禽蛋、奶制品、豆制品。注意在肝癌晚期肝功能明显异常时，要控制蛋白质的摄入，以免过多进食蛋白质诱发肝性脑病；3、多食富含维生素和膳食纤维的食物，主要见于各种水果和新鲜蔬菜，可起到辅助抗肿瘤作用。4、中药方面的食物应咨询正规中医科医生在其指导下服用。合理均衡的饮食对改善患者的预后有益。具体细则建议就诊于正规医院营养科，制定合理的膳食方案。
肝癌什么水果不能吃	肝癌患者在饮食方面应尽量避免发霉变质、油腻、煎炸、烟熏、腌制、辛辣刺激、过于坚硬易划伤消化道等食物的摄取，其他无明确的禁忌，日常食物均可食用。在饮食方面可注意以下几点：1、满足热量需求，均衡膳食：恶性肿瘤是消耗性疾病，热量充足可以减少体内蛋白质的消耗，均衡膳食可以补充营养，增强体质；2、多食低脂和富含蛋白质的食物如瘦肉、鱼、禽蛋、奶制品、豆制品。注意在肝癌晚期肝功能明显异常时，要控制蛋白质的摄入，以免过多进食蛋白质诱发肝性脑病；3、多食富含维生素和膳食纤维的食物，主要见于各种水果和新鲜蔬菜，可起到辅助抗肿瘤作用。4、中药方面的食物应咨询正规中医科医生在其指导下服用。合理均衡的饮食对改善患者的预后有益。具体细则建议就诊于正规医院营养科，制定合理的膳食方案。
肝癌患者是否需要忌口	肝癌患者在饮食方面应尽量避免发霉变质、油腻、煎炸、烟熏、腌制、辛辣刺激、过于坚硬易划伤消化道等食物的摄取，其他无明确的禁忌，日常食物均可食用。在饮食方面可注意以下几点：1、满足热量需求，均衡膳食：恶性肿瘤是消耗性疾病，热量充足可以减少体内蛋白质的消耗，均衡膳食可以补充营养，增强体质；2、多食低脂和富含蛋白质的食物如瘦肉、鱼、禽蛋、奶制品、豆制品。注意在肝癌晚期肝功能明显异常时，要控制蛋白质的摄入，以免过多进食蛋白质诱发肝性脑病；3、多食富含维生素和膳食纤维的食物，主要见于各种水果和新鲜蔬菜，可起到辅助抗肿瘤作用。4、中药方面的食物应咨询正规中医科医生在其指导下服用。合理均衡的饮食对改善患者的预后有益。具体细则建议就诊于正规医院营养科，制定合理的膳食方案。
肝癌术后多长时间才能吃牛羊肉	肝癌患者在饮食方面应尽量避免发霉变质、油腻、煎炸、烟熏、腌制、辛辣刺激、过于坚硬易划伤消化道等食物的摄取，其他无明确的禁忌，日常食物均可食用。在饮食方面可注意以下几点：1、满足热量需求，均衡膳食：恶性肿瘤是消耗性疾病，热量充足可以减少体内蛋白质的消耗，均衡膳食可以补充营养，增强体质；2、多食低脂和富含蛋白质的食物如瘦肉、鱼、禽蛋、奶制品、豆制品。注意在肝癌晚期肝功能明显异常时，要控制蛋白质的摄入，以免过多进食蛋白质诱发肝性脑病；3、多食富含维生素和膳食纤维的食物，主要见于各种水果和新鲜蔬菜，可起到辅助抗肿瘤作用。4、中药方面的食物应咨询正规中医科医生在其指导下服用。合理均衡的饮食对改善患者的预后有益。具体细则建议就诊于正规医院营养科，制定合理的膳食方案。
肝癌什么鱼不能吃	肝癌患者在饮食方面应尽量避免发霉变质、油腻、煎炸、烟熏、腌制、辛辣刺激、过于坚硬易划伤消化道等食物的摄取，其他无明确的禁忌，日常食物均可食用。在饮食方面可注意以下几点：1、满足热量需求，均衡膳食：恶性肿瘤是消耗性疾病，热量充足可以减少体内蛋白质的消耗，均衡膳食可以补充营养，增强体质；2、多食低脂和富含蛋白质的食物如瘦肉、鱼、禽蛋、奶制品、豆制品。注意在肝癌晚期肝功能明显异常时，要控制蛋白质的摄入，以免过多进食蛋白质诱发肝性脑病；3、多食富含维生素和膳食纤维的食物，主要见于各种水果和新鲜蔬菜，可起到辅助抗肿瘤作用。4、中药方面的食物应咨询正规中医科医生在其指导下服用。合理均衡的饮食对改善患者的预后有益。具体细则建议就诊于正规医院营养科，制定合理的膳食方案。
患了肝癌能不能吃栗子？	肝癌患者在饮食方面应尽量避免发霉变质、油腻、煎炸、烟熏、腌制、辛辣刺激、过于坚硬易划伤消化道等食物的摄取，其他无明确的禁忌，日常食物均可食用。在饮食方面可注意以下几点：1、满足热量需求，均衡膳食：恶性肿瘤是消耗性疾病，热量充足可以减少体内蛋白质的消耗，均衡膳食可以补充营养，增强体质；2、多食低脂和富含蛋白质的食物如瘦肉、鱼、禽蛋、奶制品、豆制品。注意在肝癌晚期肝功能明显异常时，要控制蛋白质的摄入，以免过多进食蛋白质诱发肝性脑病；3、多食富含维生素和膳食纤维的食物，主要见于各种水果和新鲜蔬菜，可起到辅助抗肿瘤作用。4、中药方面的食物应咨询正规中医科医生在其指导下服用。合理均衡的饮食对改善患者的预后有益。具体细则建议就诊于正规医院营养科，制定合理的膳食方案。
得了肝癌能吃虫草吗？	肝癌患者在饮食方面应尽量避免发霉变质、油腻、煎炸、烟熏、腌制、辛辣刺激、过于坚硬易划伤消化道等食物的摄取，其他无明确的禁忌，日常食物均可食用。在饮食方面可注意以下几点：1、满足热量需求，均衡膳食：恶性肿瘤是消耗性疾病，热量充足可以减少体内蛋白质的消耗，均衡膳食可以补充营养，增强体质；2、多食低脂和富含蛋白质的食物如瘦肉、鱼、禽蛋、奶制品、豆制品。注意在肝癌晚期肝功能明显异常时，要控制蛋白质的摄入，以免过多进食蛋白质诱发肝性脑病；3、多食富含维生素和膳食纤维的食物，主要见于各种水果和新鲜蔬菜，可起到辅助抗肿瘤作用。4、中药方面的食物应咨询正规中医科医生在其指导下服用。合理均衡的饮食对改善患者的预后有益。具体细则建议就诊于正规医院营养科，制定合理的膳食方案。
得了肝癌能吃鸭肉吗	肝癌患者在饮食方面应尽量避免发霉变质、油腻、煎炸、烟熏、腌制、辛辣刺激、过于坚硬易划伤消化道等食物的摄取，其他无明确的禁忌，日常食物均可食用。在饮食方面可注意以下几点：1、满足热量需求，均衡膳食：恶性肿瘤是消耗性疾病，热量充足可以减少体内蛋白质的消耗，均衡膳食可以补充营养，增强体质；2、多食低脂和富含蛋白质的食物如瘦肉、鱼、禽蛋、奶制品、豆制品。注意在肝癌晚期肝功能明显异常时，要控制蛋白质的摄入，以免过多进食蛋白质诱发肝性脑病；3、多食富含维生素和膳食纤维的食物，主要见于各种水果和新鲜蔬菜，可起到辅助抗肿瘤作用。4、中药方面的食物应咨询正规中医科医生在其指导下服用。合理均衡的饮食对改善患者的预后有益。具体细则建议就诊于正规医院营养科，制定合理的膳食方案。
得了肝癌吃些什么好呢？	肝癌患者在饮食方面应尽量避免发霉变质、油腻、煎炸、烟熏、腌制、辛辣刺激、过于坚硬易划伤消化道等食物的摄取，其他无明确的禁忌，日常食物均可食用。在饮食方面可注意以下几点：1、满足热量需求，均衡膳食：恶性肿瘤是消耗性疾病，热量充足可以减少体内蛋白质的消耗，均衡膳食可以补充营养，增强体质；2、多食低脂和富含蛋白质的食物如瘦肉、鱼、禽蛋、奶制品、豆制品。注意在肝癌晚期肝功能明显异常时，要控制蛋白质的摄入，以免过多进食蛋白质诱发肝性脑病；3、多食富含维生素和膳食纤维的食物，主要见于各种水果和新鲜蔬菜，可起到辅助抗肿瘤作用。4、中药方面的食物应咨询正规中医科医生在其指导下服用。合理均衡的饮食对改善患者的预后有益。具体细则建议就诊于正规医院营养科，制定合理的膳食方案。
患了肝癌能不能吃核桃？	肝癌患者在饮食方面应尽量避免发霉变质、油腻、煎炸、烟熏、腌制、辛辣刺激、过于坚硬易划伤消化道等食物的摄取，其他无明确的禁忌，日常食物均可食用。在饮食方面可注意以下几点：1、满足热量需求，均衡膳食：恶性肿瘤是消耗性疾病，热量充足可以减少体内蛋白质的消耗，均衡膳食可以补充营养，增强体质；2、多食低脂和富含蛋白质的食物如瘦肉、鱼、禽蛋、奶制品、豆制品。注意在肝癌晚期肝功能明显异常时，要控制蛋白质的摄入，以免过多进食蛋白质诱发肝性脑病；3、多食富含维生素和膳食纤维的食物，主要见于各种水果和新鲜蔬菜，可起到辅助抗肿瘤作用。4、中药方面的食物应咨询正规中医科医生在其指导下服用。合理均衡的饮食对改善患者的预后有益。具体细则建议就诊于正规医院营养科，制定合理的膳食方案。
得了肝癌还可以喝咖啡吗?	肝癌患者在饮食方面应尽量避免发霉变质、油腻、煎炸、烟熏、腌制、辛辣刺激、过于坚硬易划伤消化道等食物的摄取，其他无明确的禁忌，日常食物均可食用。在饮食方面可注意以下几点：1、满足热量需求，均衡膳食：恶性肿瘤是消耗性疾病，热量充足可以减少体内蛋白质的消耗，均衡膳食可以补充营养，增强体质；2、多食低脂和富含蛋白质的食物如瘦肉、鱼、禽蛋、奶制品、豆制品。注意在肝癌晚期肝功能明显异常时，要控制蛋白质的摄入，以免过多进食蛋白质诱发肝性脑病；3、多食富含维生素和膳食纤维的食物，主要见于各种水果和新鲜蔬菜，可起到辅助抗肿瘤作用。4、中药方面的食物应咨询正规中医科医生在其指导下服用。合理均衡的饮食对改善患者的预后有益。具体细则建议就诊于正规医院营养科，制定合理的膳食方案。
患了肝癌病人能吃香椿吗	肝癌患者在饮食方面应尽量避免发霉变质、油腻、煎炸、烟熏、腌制、辛辣刺激、过于坚硬易划伤消化道等食物的摄取，其他无明确的禁忌，日常食物均可食用。在饮食方面可注意以下几点：1、满足热量需求，均衡膳食：恶性肿瘤是消耗性疾病，热量充足可以减少体内蛋白质的消耗，均衡膳食可以补充营养，增强体质；2、多食低脂和富含蛋白质的食物如瘦肉、鱼、禽蛋、奶制品、豆制品。注意在肝癌晚期肝功能明显异常时，要控制蛋白质的摄入，以免过多进食蛋白质诱发肝性脑病；3、多食富含维生素和膳食纤维的食物，主要见于各种水果和新鲜蔬菜，可起到辅助抗肿瘤作用。4、中药方面的食物应咨询正规中医科医生在其指导下服用。合理均衡的饮食对改善患者的预后有益。具体细则建议就诊于正规医院营养科，制定合理的膳食方案。
肝癌病人能吃鲫鱼吗	肝癌患者在饮食方面应尽量避免发霉变质、油腻、煎炸、烟熏、腌制、辛辣刺激、过于坚硬易划伤消化道等食物的摄取，其他无明确的禁忌，日常食物均可食用。在饮食方面可注意以下几点：1、满足热量需求，均衡膳食：恶性肿瘤是消耗性疾病，热量充足可以减少体内蛋白质的消耗，均衡膳食可以补充营养，增强体质；2、多食低脂和富含蛋白质的食物如瘦肉、鱼、禽蛋、奶制品、豆制品。注意在肝癌晚期肝功能明显异常时，要控制蛋白质的摄入，以免过多进食蛋白质诱发肝性脑病；3、多食富含维生素和膳食纤维的食物，主要见于各种水果和新鲜蔬菜，可起到辅助抗肿瘤作用。4、中药方面的食物应咨询正规中医科医生在其指导下服用。合理均衡的饮食对改善患者的预后有益。具体细则建议就诊于正规医院营养科，制定合理的膳食方案。
肝癌患者能吃羊奶吗	肝癌患者在饮食方面应尽量避免发霉变质、油腻、煎炸、烟熏、腌制、辛辣刺激、过于坚硬易划伤消化道等食物的摄取，其他无明确的禁忌，日常食物均可食用。在饮食方面可注意以下几点：1、满足热量需求，均衡膳食：恶性肿瘤是消耗性疾病，热量充足可以减少体内蛋白质的消耗，均衡膳食可以补充营养，增强体质；2、多食低脂和富含蛋白质的食物如瘦肉、鱼、禽蛋、奶制品、豆制品。注意在肝癌晚期肝功能明显异常时，要控制蛋白质的摄入，以免过多进食蛋白质诱发肝性脑病；3、多食富含维生素和膳食纤维的食物，主要见于各种水果和新鲜蔬菜，可起到辅助抗肿瘤作用。4、中药方面的食物应咨询正规中医科医生在其指导下服用。合理均衡的饮食对改善患者的预后有益。具体细则建议就诊于正规医院营养科，制定合理的膳食方案。
肝癌病人能吃南瓜吗?	肝癌患者在饮食方面应尽量避免发霉变质、油腻、煎炸、烟熏、腌制、辛辣刺激、过于坚硬易划伤消化道等食物的摄取，其他无明确的禁忌，日常食物均可食用。在饮食方面可注意以下几点：1、满足热量需求，均衡膳食：恶性肿瘤是消耗性疾病，热量充足可以减少体内蛋白质的消耗，均衡膳食可以补充营养，增强体质；2、多食低脂和富含蛋白质的食物如瘦肉、鱼、禽蛋、奶制品、豆制品。注意在肝癌晚期肝功能明显异常时，要控制蛋白质的摄入，以免过多进食蛋白质诱发肝性脑病；3、多食富含维生素和膳食纤维的食物，主要见于各种水果和新鲜蔬菜，可起到辅助抗肿瘤作用。4、中药方面的食物应咨询正规中医科医生在其指导下服用。合理均衡的饮食对改善患者的预后有益。具体细则建议就诊于正规医院营养科，制定合理的膳食方案。
肝癌病人能吃香蕉吗	肝癌患者在饮食方面应尽量避免发霉变质、油腻、煎炸、烟熏、腌制、辛辣刺激、过于坚硬易划伤消化道等食物的摄取，其他无明确的禁忌，日常食物均可食用。在饮食方面可注意以下几点：1、满足热量需求，均衡膳食：恶性肿瘤是消耗性疾病，热量充足可以减少体内蛋白质的消耗，均衡膳食可以补充营养，增强体质；2、多食低脂和富含蛋白质的食物如瘦肉、鱼、禽蛋、奶制品、豆制品。注意在肝癌晚期肝功能明显异常时，要控制蛋白质的摄入，以免过多进食蛋白质诱发肝性脑病；3、多食富含维生素和膳食纤维的食物，主要见于各种水果和新鲜蔬菜，可起到辅助抗肿瘤作用。4、中药方面的食物应咨询正规中医科医生在其指导下服用。合理均衡的饮食对改善患者的预后有益。具体细则建议就诊于正规医院营养科，制定合理的膳食方案。
肝癌病人能喝豆浆吗	肝癌患者在饮食方面应尽量避免发霉变质、油腻、煎炸、烟熏、腌制、辛辣刺激、过于坚硬易划伤消化道等食物的摄取，其他无明确的禁忌，日常食物均可食用。在饮食方面可注意以下几点：1、满足热量需求，均衡膳食：恶性肿瘤是消耗性疾病，热量充足可以减少体内蛋白质的消耗，均衡膳食可以补充营养，增强体质；2、多食低脂和富含蛋白质的食物如瘦肉、鱼、禽蛋、奶制品、豆制品。注意在肝癌晚期肝功能明显异常时，要控制蛋白质的摄入，以免过多进食蛋白质诱发肝性脑病；3、多食富含维生素和膳食纤维的食物，主要见于各种水果和新鲜蔬菜，可起到辅助抗肿瘤作用。4、中药方面的食物应咨询正规中医科医生在其指导下服用。合理均衡的饮食对改善患者的预后有益。具体细则建议就诊于正规医院营养科，制定合理的膳食方案。
肝癌患者能吃葱或者蒜之类的东西吗	肝癌患者在饮食方面应尽量避免发霉变质、油腻、煎炸、烟熏、腌制、辛辣刺激、过于坚硬易划伤消化道等食物的摄取，其他无明确的禁忌，日常食物均可食用。在饮食方面可注意以下几点：1、满足热量需求，均衡膳食：恶性肿瘤是消耗性疾病，热量充足可以减少体内蛋白质的消耗，均衡膳食可以补充营养，增强体质；2、多食低脂和富含蛋白质的食物如瘦肉、鱼、禽蛋、奶制品、豆制品。注意在肝癌晚期肝功能明显异常时，要控制蛋白质的摄入，以免过多进食蛋白质诱发肝性脑病；3、多食富含维生素和膳食纤维的食物，主要见于各种水果和新鲜蔬菜，可起到辅助抗肿瘤作用。4、中药方面的食物应咨询正规中医科医生在其指导下服用。合理均衡的饮食对改善患者的预后有益。具体细则建议就诊于正规医院营养科，制定合理的膳食方案。
肝癌病人能吃鱼吗	肝癌患者在饮食方面应尽量避免发霉变质、油腻、煎炸、烟熏、腌制、辛辣刺激、过于坚硬易划伤消化道等食物的摄取，其他无明确的禁忌，日常食物均可食用。在饮食方面可注意以下几点：1、满足热量需求，均衡膳食：恶性肿瘤是消耗性疾病，热量充足可以减少体内蛋白质的消耗，均衡膳食可以补充营养，增强体质；2、多食低脂和富含蛋白质的食物如瘦肉、鱼、禽蛋、奶制品、豆制品。注意在肝癌晚期肝功能明显异常时，要控制蛋白质的摄入，以免过多进食蛋白质诱发肝性脑病；3、多食富含维生素和膳食纤维的食物，主要见于各种水果和新鲜蔬菜，可起到辅助抗肿瘤作用。4、中药方面的食物应咨询正规中医科医生在其指导下服用。合理均衡的饮食对改善患者的预后有益。具体细则建议就诊于正规医院营养科，制定合理的膳食方案。
肝癌病人能吃鸡蛋吗?	肝癌患者在饮食方面应尽量避免发霉变质、油腻、煎炸、烟熏、腌制、辛辣刺激、过于坚硬易划伤消化道等食物的摄取，其他无明确的禁忌，日常食物均可食用。在饮食方面可注意以下几点：1、满足热量需求，均衡膳食：恶性肿瘤是消耗性疾病，热量充足可以减少体内蛋白质的消耗，均衡膳食可以补充营养，增强体质；2、多食低脂和富含蛋白质的食物如瘦肉、鱼、禽蛋、奶制品、豆制品。注意在肝癌晚期肝功能明显异常时，要控制蛋白质的摄入，以免过多进食蛋白质诱发肝性脑病；3、多食富含维生素和膳食纤维的食物，主要见于各种水果和新鲜蔬菜，可起到辅助抗肿瘤作用。4、中药方面的食物应咨询正规中医科医生在其指导下服用。合理均衡的饮食对改善患者的预后有益。具体细则建议就诊于正规医院营养科，制定合理的膳食方案。
肝癌患者能吃牛肉吗?	肝癌患者在饮食方面应尽量避免发霉变质、油腻、煎炸、烟熏、腌制、辛辣刺激、过于坚硬易划伤消化道等食物的摄取，其他无明确的禁忌，日常食物均可食用。在饮食方面可注意以下几点：1、满足热量需求，均衡膳食：恶性肿瘤是消耗性疾病，热量充足可以减少体内蛋白质的消耗，均衡膳食可以补充营养，增强体质；2、多食低脂和富含蛋白质的食物如瘦肉、鱼、禽蛋、奶制品、豆制品。注意在肝癌晚期肝功能明显异常时，要控制蛋白质的摄入，以免过多进食蛋白质诱发肝性脑病；3、多食富含维生素和膳食纤维的食物，主要见于各种水果和新鲜蔬菜，可起到辅助抗肿瘤作用。4、中药方面的食物应咨询正规中医科医生在其指导下服用。合理均衡的饮食对改善患者的预后有益。具体细则建议就诊于正规医院营养科，制定合理的膳食方案。
肝癌腹水能吃蚕蛹吗	肝癌患者在饮食方面应尽量避免发霉变质、油腻、煎炸、烟熏、腌制、辛辣刺激、过于坚硬易划伤消化道等食物的摄取，其他无明确的禁忌，日常食物均可食用。在饮食方面可注意以下几点：1、满足热量需求，均衡膳食：恶性肿瘤是消耗性疾病，热量充足可以减少体内蛋白质的消耗，均衡膳食可以补充营养，增强体质；2、多食低脂和富含蛋白质的食物如瘦肉、鱼、禽蛋、奶制品、豆制品。注意在肝癌晚期肝功能明显异常时，要控制蛋白质的摄入，以免过多进食蛋白质诱发肝性脑病；3、多食富含维生素和膳食纤维的食物，主要见于各种水果和新鲜蔬菜，可起到辅助抗肿瘤作用。4、中药方面的食物应咨询正规中医科医生在其指导下服用。合理均衡的饮食对改善患者的预后有益。具体细则建议就诊于正规医院营养科，制定合理的膳食方案。
肝癌病人能吃胡萝卜吗	肝癌患者在饮食方面应尽量避免发霉变质、油腻、煎炸、烟熏、腌制、辛辣刺激、过于坚硬易划伤消化道等食物的摄取，其他无明确的禁忌，日常食物均可食用。在饮食方面可注意以下几点：1、满足热量需求，均衡膳食：恶性肿瘤是消耗性疾病，热量充足可以减少体内蛋白质的消耗，均衡膳食可以补充营养，增强体质；2、多食低脂和富含蛋白质的食物如瘦肉、鱼、禽蛋、奶制品、豆制品。注意在肝癌晚期肝功能明显异常时，要控制蛋白质的摄入，以免过多进食蛋白质诱发肝性脑病；3、多食富含维生素和膳食纤维的食物，主要见于各种水果和新鲜蔬菜，可起到辅助抗肿瘤作用。4、中药方面的食物应咨询正规中医科医生在其指导下服用。合理均衡的饮食对改善患者的预后有益。具体细则建议就诊于正规医院营养科，制定合理的膳食方案。
肝癌患者能吃香蕉吗	肝癌患者在饮食方面应尽量避免发霉变质、油腻、煎炸、烟熏、腌制、辛辣刺激、过于坚硬易划伤消化道等食物的摄取，其他无明确的禁忌，日常食物均可食用。在饮食方面可注意以下几点：1、满足热量需求，均衡膳食：恶性肿瘤是消耗性疾病，热量充足可以减少体内蛋白质的消耗，均衡膳食可以补充营养，增强体质；2、多食低脂和富含蛋白质的食物如瘦肉、鱼、禽蛋、奶制品、豆制品。注意在肝癌晚期肝功能明显异常时，要控制蛋白质的摄入，以免过多进食蛋白质诱发肝性脑病；3、多食富含维生素和膳食纤维的食物，主要见于各种水果和新鲜蔬菜，可起到辅助抗肿瘤作用。4、中药方面的食物应咨询正规中医科医生在其指导下服用。合理均衡的饮食对改善患者的预后有益。具体细则建议就诊于正规医院营养科，制定合理的膳食方案。
肝癌患者能吃阿胶么	肝癌患者在饮食方面应尽量避免发霉变质、油腻、煎炸、烟熏、腌制、辛辣刺激、过于坚硬易划伤消化道等食物的摄取，其他无明确的禁忌，日常食物均可食用。在饮食方面可注意以下几点：1、满足热量需求，均衡膳食：恶性肿瘤是消耗性疾病，热量充足可以减少体内蛋白质的消耗，均衡膳食可以补充营养，增强体质；2、多食低脂和富含蛋白质的食物如瘦肉、鱼、禽蛋、奶制品、豆制品。注意在肝癌晚期肝功能明显异常时，要控制蛋白质的摄入，以免过多进食蛋白质诱发肝性脑病；3、多食富含维生素和膳食纤维的食物，主要见于各种水果和新鲜蔬菜，可起到辅助抗肿瘤作用。4、中药方面的食物应咨询正规中医科医生在其指导下服用。合理均衡的饮食对改善患者的预后有益。具体细则建议就诊于正规医院营养科，制定合理的膳食方案。
肝癌患者能吃泥鳅么	肝癌患者在饮食方面应尽量避免发霉变质、油腻、煎炸、烟熏、腌制、辛辣刺激、过于坚硬易划伤消化道等食物的摄取，其他无明确的禁忌，日常食物均可食用。在饮食方面可注意以下几点：1、满足热量需求，均衡膳食：恶性肿瘤是消耗性疾病，热量充足可以减少体内蛋白质的消耗，均衡膳食可以补充营养，增强体质；2、多食低脂和富含蛋白质的食物如瘦肉、鱼、禽蛋、奶制品、豆制品。注意在肝癌晚期肝功能明显异常时，要控制蛋白质的摄入，以免过多进食蛋白质诱发肝性脑病；3、多食富含维生素和膳食纤维的食物，主要见于各种水果和新鲜蔬菜，可起到辅助抗肿瘤作用。4、中药方面的食物应咨询正规中医科医生在其指导下服用。合理均衡的饮食对改善患者的预后有益。具体细则建议就诊于正规医院营养科，制定合理的膳食方案。
肝癌病人能吃红豆杉吗	肝癌患者在饮食方面应尽量避免发霉变质、油腻、煎炸、烟熏、腌制、辛辣刺激、过于坚硬易划伤消化道等食物的摄取，其他无明确的禁忌，日常食物均可食用。在饮食方面可注意以下几点：1、满足热量需求，均衡膳食：恶性肿瘤是消耗性疾病，热量充足可以减少体内蛋白质的消耗，均衡膳食可以补充营养，增强体质；2、多食低脂和富含蛋白质的食物如瘦肉、鱼、禽蛋、奶制品、豆制品。注意在肝癌晚期肝功能明显异常时，要控制蛋白质的摄入，以免过多进食蛋白质诱发肝性脑病；3、多食富含维生素和膳食纤维的食物，主要见于各种水果和新鲜蔬菜，可起到辅助抗肿瘤作用。4、中药方面的食物应咨询正规中医科医生在其指导下服用。合理均衡的饮食对改善患者的预后有益。具体细则建议就诊于正规医院营养科，制定合理的膳食方案。
肝癌患者能吃馒头吗	肝癌患者在饮食方面应尽量避免发霉变质、油腻、煎炸、烟熏、腌制、辛辣刺激、过于坚硬易划伤消化道等食物的摄取，其他无明确的禁忌，日常食物均可食用。在饮食方面可注意以下几点：1、满足热量需求，均衡膳食：恶性肿瘤是消耗性疾病，热量充足可以减少体内蛋白质的消耗，均衡膳食可以补充营养，增强体质；2、多食低脂和富含蛋白质的食物如瘦肉、鱼、禽蛋、奶制品、豆制品。注意在肝癌晚期肝功能明显异常时，要控制蛋白质的摄入，以免过多进食蛋白质诱发肝性脑病；3、多食富含维生素和膳食纤维的食物，主要见于各种水果和新鲜蔬菜，可起到辅助抗肿瘤作用。4、中药方面的食物应咨询正规中医科医生在其指导下服用。合理均衡的饮食对改善患者的预后有益。具体细则建议就诊于正规医院营养科，制定合理的膳食方案。
肝癌患者能喝绿豆汤吗	肝癌患者在饮食方面应尽量避免发霉变质、油腻、煎炸、烟熏、腌制、辛辣刺激、过于坚硬易划伤消化道等食物的摄取，其他无明确的禁忌，日常食物均可食用。在饮食方面可注意以下几点：1、满足热量需求，均衡膳食：恶性肿瘤是消耗性疾病，热量充足可以减少体内蛋白质的消耗，均衡膳食可以补充营养，增强体质；2、多食低脂和富含蛋白质的食物如瘦肉、鱼、禽蛋、奶制品、豆制品。注意在肝癌晚期肝功能明显异常时，要控制蛋白质的摄入，以免过多进食蛋白质诱发肝性脑病；3、多食富含维生素和膳食纤维的食物，主要见于各种水果和新鲜蔬菜，可起到辅助抗肿瘤作用。4、中药方面的食物应咨询正规中医科医生在其指导下服用。合理均衡的饮食对改善患者的预后有益。具体细则建议就诊于正规医院营养科，制定合理的膳食方案。
肝癌患者能吃鸡肉吗	肝癌患者在饮食方面应尽量避免发霉变质、油腻、煎炸、烟熏、腌制、辛辣刺激、过于坚硬易划伤消化道等食物的摄取，其他无明确的禁忌，日常食物均可食用。在饮食方面可注意以下几点：1、满足热量需求，均衡膳食：恶性肿瘤是消耗性疾病，热量充足可以减少体内蛋白质的消耗，均衡膳食可以补充营养，增强体质；2、多食低脂和富含蛋白质的食物如瘦肉、鱼、禽蛋、奶制品、豆制品。注意在肝癌晚期肝功能明显异常时，要控制蛋白质的摄入，以免过多进食蛋白质诱发肝性脑病；3、多食富含维生素和膳食纤维的食物，主要见于各种水果和新鲜蔬菜，可起到辅助抗肿瘤作用。4、中药方面的食物应咨询正规中医科医生在其指导下服用。合理均衡的饮食对改善患者的预后有益。具体细则建议就诊于正规医院营养科，制定合理的膳食方案。
肝癌病人能吃核桃吗?	肝癌患者在饮食方面应尽量避免发霉变质、油腻、煎炸、烟熏、腌制、辛辣刺激、过于坚硬易划伤消化道等食物的摄取，其他无明确的禁忌，日常食物均可食用。在饮食方面可注意以下几点：1、满足热量需求，均衡膳食：恶性肿瘤是消耗性疾病，热量充足可以减少体内蛋白质的消耗，均衡膳食可以补充营养，增强体质；2、多食低脂和富含蛋白质的食物如瘦肉、鱼、禽蛋、奶制品、豆制品。注意在肝癌晚期肝功能明显异常时，要控制蛋白质的摄入，以免过多进食蛋白质诱发肝性脑病；3、多食富含维生素和膳食纤维的食物，主要见于各种水果和新鲜蔬菜，可起到辅助抗肿瘤作用。4、中药方面的食物应咨询正规中医科医生在其指导下服用。合理均衡的饮食对改善患者的预后有益。具体细则建议就诊于正规医院营养科，制定合理的膳食方案。
肝癌病人能吃鱿鱼吗	肝癌患者在饮食方面应尽量避免发霉变质、油腻、煎炸、烟熏、腌制、辛辣刺激、过于坚硬易划伤消化道等食物的摄取，其他无明确的禁忌，日常食物均可食用。在饮食方面可注意以下几点：1、满足热量需求，均衡膳食：恶性肿瘤是消耗性疾病，热量充足可以减少体内蛋白质的消耗，均衡膳食可以补充营养，增强体质；2、多食低脂和富含蛋白质的食物如瘦肉、鱼、禽蛋、奶制品、豆制品。注意在肝癌晚期肝功能明显异常时，要控制蛋白质的摄入，以免过多进食蛋白质诱发肝性脑病；3、多食富含维生素和膳食纤维的食物，主要见于各种水果和新鲜蔬菜，可起到辅助抗肿瘤作用。4、中药方面的食物应咨询正规中医科医生在其指导下服用。合理均衡的饮食对改善患者的预后有益。具体细则建议就诊于正规医院营养科，制定合理的膳食方案。
肝癌患者不能吃烤的东西.那蛋糕面包可以吃吗	肝癌患者在饮食方面应尽量避免发霉变质、油腻、煎炸、烟熏、腌制、辛辣刺激、过于坚硬易划伤消化道等食物的摄取，其他无明确的禁忌，日常食物均可食用。在饮食方面可注意以下几点：1、满足热量需求，均衡膳食：恶性肿瘤是消耗性疾病，热量充足可以减少体内蛋白质的消耗，均衡膳食可以补充营养，增强体质；2、多食低脂和富含蛋白质的食物如瘦肉、鱼、禽蛋、奶制品、豆制品。注意在肝癌晚期肝功能明显异常时，要控制蛋白质的摄入，以免过多进食蛋白质诱发肝性脑病；3、多食富含维生素和膳食纤维的食物，主要见于各种水果和新鲜蔬菜，可起到辅助抗肿瘤作用。4、中药方面的食物应咨询正规中医科医生在其指导下服用。合理均衡的饮食对改善患者的预后有益。具体细则建议就诊于正规医院营养科，制定合理的膳食方案。
肝癌病人能吃虾吗?	肝癌患者在饮食方面应尽量避免发霉变质、油腻、煎炸、烟熏、腌制、辛辣刺激、过于坚硬易划伤消化道等食物的摄取，其他无明确的禁忌，日常食物均可食用。在饮食方面可注意以下几点：1、满足热量需求，均衡膳食：恶性肿瘤是消耗性疾病，热量充足可以减少体内蛋白质的消耗，均衡膳食可以补充营养，增强体质；2、多食低脂和富含蛋白质的食物如瘦肉、鱼、禽蛋、奶制品、豆制品。注意在肝癌晚期肝功能明显异常时，要控制蛋白质的摄入，以免过多进食蛋白质诱发肝性脑病；3、多食富含维生素和膳食纤维的食物，主要见于各种水果和新鲜蔬菜，可起到辅助抗肿瘤作用。4、中药方面的食物应咨询正规中医科医生在其指导下服用。合理均衡的饮食对改善患者的预后有益。具体细则建议就诊于正规医院营养科，制定合理的膳食方案。
肝癌病人能吃姜、葱、蒜吗？	肝癌患者在饮食方面应尽量避免发霉变质、油腻、煎炸、烟熏、腌制、辛辣刺激、过于坚硬易划伤消化道等食物的摄取，其他无明确的禁忌，日常食物均可食用。在饮食方面可注意以下几点：1、满足热量需求，均衡膳食：恶性肿瘤是消耗性疾病，热量充足可以减少体内蛋白质的消耗，均衡膳食可以补充营养，增强体质；2、多食低脂和富含蛋白质的食物如瘦肉、鱼、禽蛋、奶制品、豆制品。注意在肝癌晚期肝功能明显异常时，要控制蛋白质的摄入，以免过多进食蛋白质诱发肝性脑病；3、多食富含维生素和膳食纤维的食物，主要见于各种水果和新鲜蔬菜，可起到辅助抗肿瘤作用。4、中药方面的食物应咨询正规中医科医生在其指导下服用。合理均衡的饮食对改善患者的预后有益。具体细则建议就诊于正规医院营养科，制定合理的膳食方案。
肝癌病人能吃羊肉吗	肝癌患者在饮食方面应尽量避免发霉变质、油腻、煎炸、烟熏、腌制、辛辣刺激、过于坚硬易划伤消化道等食物的摄取，其他无明确的禁忌，日常食物均可食用。在饮食方面可注意以下几点：1、满足热量需求，均衡膳食：恶性肿瘤是消耗性疾病，热量充足可以减少体内蛋白质的消耗，均衡膳食可以补充营养，增强体质；2、多食低脂和富含蛋白质的食物如瘦肉、鱼、禽蛋、奶制品、豆制品。注意在肝癌晚期肝功能明显异常时，要控制蛋白质的摄入，以免过多进食蛋白质诱发肝性脑病；3、多食富含维生素和膳食纤维的食物，主要见于各种水果和新鲜蔬菜，可起到辅助抗肿瘤作用。4、中药方面的食物应咨询正规中医科医生在其指导下服用。合理均衡的饮食对改善患者的预后有益。具体细则建议就诊于正规医院营养科，制定合理的膳食方案。
肝癌病人能吃银耳吗	肝癌患者在饮食方面应尽量避免发霉变质、油腻、煎炸、烟熏、腌制、辛辣刺激、过于坚硬易划伤消化道等食物的摄取，其他无明确的禁忌，日常食物均可食用。在饮食方面可注意以下几点：1、满足热量需求，均衡膳食：恶性肿瘤是消耗性疾病，热量充足可以减少体内蛋白质的消耗，均衡膳食可以补充营养，增强体质；2、多食低脂和富含蛋白质的食物如瘦肉、鱼、禽蛋、奶制品、豆制品。注意在肝癌晚期肝功能明显异常时，要控制蛋白质的摄入，以免过多进食蛋白质诱发肝性脑病；3、多食富含维生素和膳食纤维的食物，主要见于各种水果和新鲜蔬菜，可起到辅助抗肿瘤作用。4、中药方面的食物应咨询正规中医科医生在其指导下服用。合理均衡的饮食对改善患者的预后有益。具体细则建议就诊于正规医院营养科，制定合理的膳食方案。
你好！肝癌患者可以吃螃蟹吗	肝癌患者在饮食方面应尽量避免发霉变质、油腻、煎炸、烟熏、腌制、辛辣刺激、过于坚硬易划伤消化道等食物的摄取，其他无明确的禁忌，日常食物均可食用。在饮食方面可注意以下几点：1、满足热量需求，均衡膳食：恶性肿瘤是消耗性疾病，热量充足可以减少体内蛋白质的消耗，均衡膳食可以补充营养，增强体质；2、多食低脂和富含蛋白质的食物如瘦肉、鱼、禽蛋、奶制品、豆制品。注意在肝癌晚期肝功能明显异常时，要控制蛋白质的摄入，以免过多进食蛋白质诱发肝性脑病；3、多食富含维生素和膳食纤维的食物，主要见于各种水果和新鲜蔬菜，可起到辅助抗肿瘤作用。4、中药方面的食物应咨询正规中医科医生在其指导下服用。合理均衡的饮食对改善患者的预后有益。具体细则建议就诊于正规医院营养科，制定合理的膳食方案。
肝癌晚期吃火龙果好吗？	肝癌患者在饮食方面应尽量避免发霉变质、油腻、煎炸、烟熏、腌制、辛辣刺激、过于坚硬易划伤消化道等食物的摄取，其他无明确的禁忌，日常食物均可食用。在饮食方面可注意以下几点：1、满足热量需求，均衡膳食：恶性肿瘤是消耗性疾病，热量充足可以减少体内蛋白质的消耗，均衡膳食可以补充营养，增强体质；2、多食低脂和富含蛋白质的食物如瘦肉、鱼、禽蛋、奶制品、豆制品。注意在肝癌晚期肝功能明显异常时，要控制蛋白质的摄入，以免过多进食蛋白质诱发肝性脑病；3、多食富含维生素和膳食纤维的食物，主要见于各种水果和新鲜蔬菜，可起到辅助抗肿瘤作用。4、中药方面的食物应咨询正规中医科医生在其指导下服用。合理均衡的饮食对改善患者的预后有益。具体细则建议就诊于正规医院营养科，制定合理的膳食方案。
肝癌患者喝豆浆行吗	肝癌患者在饮食方面应尽量避免发霉变质、油腻、煎炸、烟熏、腌制、辛辣刺激、过于坚硬易划伤消化道等食物的摄取，其他无明确的禁忌，日常食物均可食用。在饮食方面可注意以下几点：1、满足热量需求，均衡膳食：恶性肿瘤是消耗性疾病，热量充足可以减少体内蛋白质的消耗，均衡膳食可以补充营养，增强体质；2、多食低脂和富含蛋白质的食物如瘦肉、鱼、禽蛋、奶制品、豆制品。注意在肝癌晚期肝功能明显异常时，要控制蛋白质的摄入，以免过多进食蛋白质诱发肝性脑病；3、多食富含维生素和膳食纤维的食物，主要见于各种水果和新鲜蔬菜，可起到辅助抗肿瘤作用。4、中药方面的食物应咨询正规中医科医生在其指导下服用。合理均衡的饮食对改善患者的预后有益。具体细则建议就诊于正规医院营养科，制定合理的膳食方案。
肝癌症患者能吃萝卜吗？	肝癌患者在饮食方面应尽量避免发霉变质、油腻、煎炸、烟熏、腌制、辛辣刺激、过于坚硬易划伤消化道等食物的摄取，其他无明确的禁忌，日常食物均可食用。在饮食方面可注意以下几点：1、满足热量需求，均衡膳食：恶性肿瘤是消耗性疾病，热量充足可以减少体内蛋白质的消耗，均衡膳食可以补充营养，增强体质；2、多食低脂和富含蛋白质的食物如瘦肉、鱼、禽蛋、奶制品、豆制品。注意在肝癌晚期肝功能明显异常时，要控制蛋白质的摄入，以免过多进食蛋白质诱发肝性脑病；3、多食富含维生素和膳食纤维的食物，主要见于各种水果和新鲜蔬菜，可起到辅助抗肿瘤作用。4、中药方面的食物应咨询正规中医科医生在其指导下服用。合理均衡的饮食对改善患者的预后有益。具体细则建议就诊于正规医院营养科，制定合理的膳食方案。
肝癌病人能多吃山楂片吗	肝癌患者在饮食方面应尽量避免发霉变质、油腻、煎炸、烟熏、腌制、辛辣刺激、过于坚硬易划伤消化道等食物的摄取，其他无明确的禁忌，日常食物均可食用。在饮食方面可注意以下几点：1、满足热量需求，均衡膳食：恶性肿瘤是消耗性疾病，热量充足可以减少体内蛋白质的消耗，均衡膳食可以补充营养，增强体质；2、多食低脂和富含蛋白质的食物如瘦肉、鱼、禽蛋、奶制品、豆制品。注意在肝癌晚期肝功能明显异常时，要控制蛋白质的摄入，以免过多进食蛋白质诱发肝性脑病；3、多食富含维生素和膳食纤维的食物，主要见于各种水果和新鲜蔬菜，可起到辅助抗肿瘤作用。4、中药方面的食物应咨询正规中医科医生在其指导下服用。合理均衡的饮食对改善患者的预后有益。具体细则建议就诊于正规医院营养科，制定合理的膳食方案。
肝癌患者还可以吃狗肉吗	肝癌患者在饮食方面应尽量避免发霉变质、油腻、煎炸、烟熏、腌制、辛辣刺激、过于坚硬易划伤消化道等食物的摄取，其他无明确的禁忌，日常食物均可食用。在饮食方面可注意以下几点：1、满足热量需求，均衡膳食：恶性肿瘤是消耗性疾病，热量充足可以减少体内蛋白质的消耗，均衡膳食可以补充营养，增强体质；2、多食低脂和富含蛋白质的食物如瘦肉、鱼、禽蛋、奶制品、豆制品。注意在肝癌晚期肝功能明显异常时，要控制蛋白质的摄入，以免过多进食蛋白质诱发肝性脑病；3、多食富含维生素和膳食纤维的食物，主要见于各种水果和新鲜蔬菜，可起到辅助抗肿瘤作用。4、中药方面的食物应咨询正规中医科医生在其指导下服用。合理均衡的饮食对改善患者的预后有益。具体细则建议就诊于正规医院营养科，制定合理的膳食方案。
中晚期肝癌病人能吃鸡蛋.鸡肉吗	肝癌患者在饮食方面应尽量避免发霉变质、油腻、煎炸、烟熏、腌制、辛辣刺激、过于坚硬易划伤消化道等食物的摄取，其他无明确的禁忌，日常食物均可食用。在饮食方面可注意以下几点：1、满足热量需求，均衡膳食：恶性肿瘤是消耗性疾病，热量充足可以减少体内蛋白质的消耗，均衡膳食可以补充营养，增强体质；2、多食低脂和富含蛋白质的食物如瘦肉、鱼、禽蛋、奶制品、豆制品。注意在肝癌晚期肝功能明显异常时，要控制蛋白质的摄入，以免过多进食蛋白质诱发肝性脑病；3、多食富含维生素和膳食纤维的食物，主要见于各种水果和新鲜蔬菜，可起到辅助抗肿瘤作用。4、中药方面的食物应咨询正规中医科医生在其指导下服用。合理均衡的饮食对改善患者的预后有益。具体细则建议就诊于正规医院营养科，制定合理的膳食方案。
肝癌患者不可以吃公鸡吗？	肝癌患者在饮食方面应尽量避免发霉变质、油腻、煎炸、烟熏、腌制、辛辣刺激、过于坚硬易划伤消化道等食物的摄取，其他无明确的禁忌，日常食物均可食用。在饮食方面可注意以下几点：1、满足热量需求，均衡膳食：恶性肿瘤是消耗性疾病，热量充足可以减少体内蛋白质的消耗，均衡膳食可以补充营养，增强体质；2、多食低脂和富含蛋白质的食物如瘦肉、鱼、禽蛋、奶制品、豆制品。注意在肝癌晚期肝功能明显异常时，要控制蛋白质的摄入，以免过多进食蛋白质诱发肝性脑病；3、多食富含维生素和膳食纤维的食物，主要见于各种水果和新鲜蔬菜，可起到辅助抗肿瘤作用。4、中药方面的食物应咨询正规中医科医生在其指导下服用。合理均衡的饮食对改善患者的预后有益。具体细则建议就诊于正规医院营养科，制定合理的膳食方案。
肝癌病人可以多吃竹笋吗？	肝癌患者在饮食方面应尽量避免发霉变质、油腻、煎炸、烟熏、腌制、辛辣刺激、过于坚硬易划伤消化道等食物的摄取，其他无明确的禁忌，日常食物均可食用。在饮食方面可注意以下几点：1、满足热量需求，均衡膳食：恶性肿瘤是消耗性疾病，热量充足可以减少体内蛋白质的消耗，均衡膳食可以补充营养，增强体质；2、多食低脂和富含蛋白质的食物如瘦肉、鱼、禽蛋、奶制品、豆制品。注意在肝癌晚期肝功能明显异常时，要控制蛋白质的摄入，以免过多进食蛋白质诱发肝性脑病；3、多食富含维生素和膳食纤维的食物，主要见于各种水果和新鲜蔬菜，可起到辅助抗肿瘤作用。4、中药方面的食物应咨询正规中医科医生在其指导下服用。合理均衡的饮食对改善患者的预后有益。具体细则建议就诊于正规医院营养科，制定合理的膳食方案。
肝癌症患者能吃鸭肉吗	肝癌患者在饮食方面应尽量避免发霉变质、油腻、煎炸、烟熏、腌制、辛辣刺激、过于坚硬易划伤消化道等食物的摄取，其他无明确的禁忌，日常食物均可食用。在饮食方面可注意以下几点：1、满足热量需求，均衡膳食：恶性肿瘤是消耗性疾病，热量充足可以减少体内蛋白质的消耗，均衡膳食可以补充营养，增强体质；2、多食低脂和富含蛋白质的食物如瘦肉、鱼、禽蛋、奶制品、豆制品。注意在肝癌晚期肝功能明显异常时，要控制蛋白质的摄入，以免过多进食蛋白质诱发肝性脑病；3、多食富含维生素和膳食纤维的食物，主要见于各种水果和新鲜蔬菜，可起到辅助抗肿瘤作用。4、中药方面的食物应咨询正规中医科医生在其指导下服用。合理均衡的饮食对改善患者的预后有益。具体细则建议就诊于正规医院营养科，制定合理的膳食方案。
肝癌病人是否可以吃茄子	肝癌患者在饮食方面应尽量避免发霉变质、油腻、煎炸、烟熏、腌制、辛辣刺激、过于坚硬易划伤消化道等食物的摄取，其他无明确的禁忌，日常食物均可食用。在饮食方面可注意以下几点：1、满足热量需求，均衡膳食：恶性肿瘤是消耗性疾病，热量充足可以减少体内蛋白质的消耗，均衡膳食可以补充营养，增强体质；2、多食低脂和富含蛋白质的食物如瘦肉、鱼、禽蛋、奶制品、豆制品。注意在肝癌晚期肝功能明显异常时，要控制蛋白质的摄入，以免过多进食蛋白质诱发肝性脑病；3、多食富含维生素和膳食纤维的食物，主要见于各种水果和新鲜蔬菜，可起到辅助抗肿瘤作用。4、中药方面的食物应咨询正规中医科医生在其指导下服用。合理均衡的饮食对改善患者的预后有益。具体细则建议就诊于正规医院营养科，制定合理的膳食方案。
肝癌晚期患者可以吃海参和鲍鱼吗	肝癌患者在饮食方面应尽量避免发霉变质、油腻、煎炸、烟熏、腌制、辛辣刺激、过于坚硬易划伤消化道等食物的摄取，其他无明确的禁忌，日常食物均可食用。在饮食方面可注意以下几点：1、满足热量需求，均衡膳食：恶性肿瘤是消耗性疾病，热量充足可以减少体内蛋白质的消耗，均衡膳食可以补充营养，增强体质；2、多食低脂和富含蛋白质的食物如瘦肉、鱼、禽蛋、奶制品、豆制品。注意在肝癌晚期肝功能明显异常时，要控制蛋白质的摄入，以免过多进食蛋白质诱发肝性脑病；3、多食富含维生素和膳食纤维的食物，主要见于各种水果和新鲜蔬菜，可起到辅助抗肿瘤作用。4、中药方面的食物应咨询正规中医科医生在其指导下服用。合理均衡的饮食对改善患者的预后有益。具体细则建议就诊于正规医院营养科，制定合理的膳食方案。
肝癌晚期病人可以吃麝香吗	肝癌患者在饮食方面应尽量避免发霉变质、油腻、煎炸、烟熏、腌制、辛辣刺激、过于坚硬易划伤消化道等食物的摄取，其他无明确的禁忌，日常食物均可食用。在饮食方面可注意以下几点：1、满足热量需求，均衡膳食：恶性肿瘤是消耗性疾病，热量充足可以减少体内蛋白质的消耗，均衡膳食可以补充营养，增强体质；2、多食低脂和富含蛋白质的食物如瘦肉、鱼、禽蛋、奶制品、豆制品。注意在肝癌晚期肝功能明显异常时，要控制蛋白质的摄入，以免过多进食蛋白质诱发肝性脑病；3、多食富含维生素和膳食纤维的食物，主要见于各种水果和新鲜蔬菜，可起到辅助抗肿瘤作用。4、中药方面的食物应咨询正规中医科医生在其指导下服用。合理均衡的饮食对改善患者的预后有益。具体细则建议就诊于正规医院营养科，制定合理的膳食方案。
肝癌中晚期病人能吃蛹吗	肝癌患者在饮食方面应尽量避免发霉变质、油腻、煎炸、烟熏、腌制、辛辣刺激、过于坚硬易划伤消化道等食物的摄取，其他无明确的禁忌，日常食物均可食用。在饮食方面可注意以下几点：1、满足热量需求，均衡膳食：恶性肿瘤是消耗性疾病，热量充足可以减少体内蛋白质的消耗，均衡膳食可以补充营养，增强体质；2、多食低脂和富含蛋白质的食物如瘦肉、鱼、禽蛋、奶制品、豆制品。注意在肝癌晚期肝功能明显异常时，要控制蛋白质的摄入，以免过多进食蛋白质诱发肝性脑病；3、多食富含维生素和膳食纤维的食物，主要见于各种水果和新鲜蔬菜，可起到辅助抗肿瘤作用。4、中药方面的食物应咨询正规中医科医生在其指导下服用。合理均衡的饮食对改善患者的预后有益。具体细则建议就诊于正规医院营养科，制定合理的膳食方案。
肝癌晚期患者可以吃鸽子吗？	肝癌患者在饮食方面应尽量避免发霉变质、油腻、煎炸、烟熏、腌制、辛辣刺激、过于坚硬易划伤消化道等食物的摄取，其他无明确的禁忌，日常食物均可食用。在饮食方面可注意以下几点：1、满足热量需求，均衡膳食：恶性肿瘤是消耗性疾病，热量充足可以减少体内蛋白质的消耗，均衡膳食可以补充营养，增强体质；2、多食低脂和富含蛋白质的食物如瘦肉、鱼、禽蛋、奶制品、豆制品。注意在肝癌晚期肝功能明显异常时，要控制蛋白质的摄入，以免过多进食蛋白质诱发肝性脑病；3、多食富含维生素和膳食纤维的食物，主要见于各种水果和新鲜蔬菜，可起到辅助抗肿瘤作用。4、中药方面的食物应咨询正规中医科医生在其指导下服用。合理均衡的饮食对改善患者的预后有益。具体细则建议就诊于正规医院营养科，制定合理的膳食方案。
肝癌患者的饮食禁忌	肝癌患者在饮食方面应尽量避免发霉变质、油腻、煎炸、烟熏、腌制、辛辣刺激、过于坚硬易划伤消化道等食物的摄取，其他无明确的禁忌，日常食物均可食用。在饮食方面可注意以下几点：1、满足热量需求，均衡膳食：恶性肿瘤是消耗性疾病，热量充足可以减少体内蛋白质的消耗，均衡膳食可以补充营养，增强体质；2、多食低脂和富含蛋白质的食物如瘦肉、鱼、禽蛋、奶制品、豆制品。注意在肝癌晚期肝功能明显异常时，要控制蛋白质的摄入，以免过多进食蛋白质诱发肝性脑病；3、多食富含维生素和膳食纤维的食物，主要见于各种水果和新鲜蔬菜，可起到辅助抗肿瘤作用。4、中药方面的食物应咨询正规中医科医生在其指导下服用。合理均衡的饮食对改善患者的预后有益。具体细则建议就诊于正规医院营养科，制定合理的膳食方案。
肝癌晚期病人饮食如何调理好	肝癌患者在饮食方面应尽量避免发霉变质、油腻、煎炸、烟熏、腌制、辛辣刺激、过于坚硬易划伤消化道等食物的摄取，其他无明确的禁忌，日常食物均可食用。在饮食方面可注意以下几点：1、满足热量需求，均衡膳食：恶性肿瘤是消耗性疾病，热量充足可以减少体内蛋白质的消耗，均衡膳食可以补充营养，增强体质；2、多食低脂和富含蛋白质的食物如瘦肉、鱼、禽蛋、奶制品、豆制品。注意在肝癌晚期肝功能明显异常时，要控制蛋白质的摄入，以免过多进食蛋白质诱发肝性脑病；3、多食富含维生素和膳食纤维的食物，主要见于各种水果和新鲜蔬菜，可起到辅助抗肿瘤作用。4、中药方面的食物应咨询正规中医科医生在其指导下服用。合理均衡的饮食对改善患者的预后有益。具体细则建议就诊于正规医院营养科，制定合理的膳食方案。
肝癌晚期吃甜食吗？	肝癌患者在饮食方面应尽量避免发霉变质、油腻、煎炸、烟熏、腌制、辛辣刺激、过于坚硬易划伤消化道等食物的摄取，其他无明确的禁忌，日常食物均可食用。在饮食方面可注意以下几点：1、满足热量需求，均衡膳食：恶性肿瘤是消耗性疾病，热量充足可以减少体内蛋白质的消耗，均衡膳食可以补充营养，增强体质；2、多食低脂和富含蛋白质的食物如瘦肉、鱼、禽蛋、奶制品、豆制品。注意在肝癌晚期肝功能明显异常时，要控制蛋白质的摄入，以免过多进食蛋白质诱发肝性脑病；3、多食富含维生素和膳食纤维的食物，主要见于各种水果和新鲜蔬菜，可起到辅助抗肿瘤作用。4、中药方面的食物应咨询正规中医科医生在其指导下服用。合理均衡的饮食对改善患者的预后有益。具体细则建议就诊于正规医院营养科，制定合理的膳食方案。
原发性肝癌喝什么汤好呢？	肝癌患者在饮食方面应尽量避免发霉变质、油腻、煎炸、烟熏、腌制、辛辣刺激、过于坚硬易划伤消化道等食物的摄取，其他无明确的禁忌，日常食物均可食用。在饮食方面可注意以下几点：1、满足热量需求，均衡膳食：恶性肿瘤是消耗性疾病，热量充足可以减少体内蛋白质的消耗，均衡膳食可以补充营养，增强体质；2、多食低脂和富含蛋白质的食物如瘦肉、鱼、禽蛋、奶制品、豆制品。注意在肝癌晚期肝功能明显异常时，要控制蛋白质的摄入，以免过多进食蛋白质诱发肝性脑病；3、多食富含维生素和膳食纤维的食物，主要见于各种水果和新鲜蔬菜，可起到辅助抗肿瘤作用。4、中药方面的食物应咨询正规中医科医生在其指导下服用。合理均衡的饮食对改善患者的预后有益。具体细则建议就诊于正规医院营养科，制定合理的膳食方案。
肝癌患者的饮食禁忌是什么？	肝癌患者在饮食方面应尽量避免发霉变质、油腻、煎炸、烟熏、腌制、辛辣刺激、过于坚硬易划伤消化道等食物的摄取，其他无明确的禁忌，日常食物均可食用。在饮食方面可注意以下几点：1、满足热量需求，均衡膳食：恶性肿瘤是消耗性疾病，热量充足可以减少体内蛋白质的消耗，均衡膳食可以补充营养，增强体质；2、多食低脂和富含蛋白质的食物如瘦肉、鱼、禽蛋、奶制品、豆制品。注意在肝癌晚期肝功能明显异常时，要控制蛋白质的摄入，以免过多进食蛋白质诱发肝性脑病；3、多食富含维生素和膳食纤维的食物，主要见于各种水果和新鲜蔬菜，可起到辅助抗肿瘤作用。4、中药方面的食物应咨询正规中医科医生在其指导下服用。合理均衡的饮食对改善患者的预后有益。具体细则建议就诊于正规医院营养科，制定合理的膳食方案。
我爸爸得了肝癌能吃鸽子吗？	肝癌患者在饮食方面应尽量避免发霉变质、油腻、煎炸、烟熏、腌制、辛辣刺激、过于坚硬易划伤消化道等食物的摄取，其他无明确的禁忌，日常食物均可食用。在饮食方面可注意以下几点：1、满足热量需求，均衡膳食：恶性肿瘤是消耗性疾病，热量充足可以减少体内蛋白质的消耗，均衡膳食可以补充营养，增强体质；2、多食低脂和富含蛋白质的食物如瘦肉、鱼、禽蛋、奶制品、豆制品。注意在肝癌晚期肝功能明显异常时，要控制蛋白质的摄入，以免过多进食蛋白质诱发肝性脑病；3、多食富含维生素和膳食纤维的食物，主要见于各种水果和新鲜蔬菜，可起到辅助抗肿瘤作用。4、中药方面的食物应咨询正规中医科医生在其指导下服用。合理均衡的饮食对改善患者的预后有益。具体细则建议就诊于正规医院营养科，制定合理的膳食方案。
我想请问一下肝癌晚期可以喝蜂蜜水吗。	肝癌患者在饮食方面应尽量避免发霉变质、油腻、煎炸、烟熏、腌制、辛辣刺激、过于坚硬易划伤消化道等食物的摄取，其他无明确的禁忌，日常食物均可食用。在饮食方面可注意以下几点：1、满足热量需求，均衡膳食：恶性肿瘤是消耗性疾病，热量充足可以减少体内蛋白质的消耗，均衡膳食可以补充营养，增强体质；2、多食低脂和富含蛋白质的食物如瘦肉、鱼、禽蛋、奶制品、豆制品。注意在肝癌晚期肝功能明显异常时，要控制蛋白质的摄入，以免过多进食蛋白质诱发肝性脑病；3、多食富含维生素和膳食纤维的食物，主要见于各种水果和新鲜蔬菜，可起到辅助抗肿瘤作用。4、中药方面的食物应咨询正规中医科医生在其指导下服用。合理均衡的饮食对改善患者的预后有益。具体细则建议就诊于正规医院营养科，制定合理的膳食方案。
肝癌能吃葱姜蒜吗？	肝癌患者在饮食方面应尽量避免发霉变质、油腻、煎炸、烟熏、腌制、辛辣刺激、过于坚硬易划伤消化道等食物的摄取，其他无明确的禁忌，日常食物均可食用。在饮食方面可注意以下几点：1、满足热量需求，均衡膳食：恶性肿瘤是消耗性疾病，热量充足可以减少体内蛋白质的消耗，均衡膳食可以补充营养，增强体质；2、多食低脂和富含蛋白质的食物如瘦肉、鱼、禽蛋、奶制品、豆制品。注意在肝癌晚期肝功能明显异常时，要控制蛋白质的摄入，以免过多进食蛋白质诱发肝性脑病；3、多食富含维生素和膳食纤维的食物，主要见于各种水果和新鲜蔬菜，可起到辅助抗肿瘤作用。4、中药方面的食物应咨询正规中医科医生在其指导下服用。合理均衡的饮食对改善患者的预后有益。具体细则建议就诊于正规医院营养科，制定合理的膳食方案。
肝癌能吃辣的吗？	肝癌患者在饮食方面应尽量避免发霉变质、油腻、煎炸、烟熏、腌制、辛辣刺激、过于坚硬易划伤消化道等食物的摄取，其他无明确的禁忌，日常食物均可食用。在饮食方面可注意以下几点：1、满足热量需求，均衡膳食：恶性肿瘤是消耗性疾病，热量充足可以减少体内蛋白质的消耗，均衡膳食可以补充营养，增强体质；2、多食低脂和富含蛋白质的食物如瘦肉、鱼、禽蛋、奶制品、豆制品。注意在肝癌晚期肝功能明显异常时，要控制蛋白质的摄入，以免过多进食蛋白质诱发肝性脑病；3、多食富含维生素和膳食纤维的食物，主要见于各种水果和新鲜蔬菜，可起到辅助抗肿瘤作用。4、中药方面的食物应咨询正规中医科医生在其指导下服用。合理均衡的饮食对改善患者的预后有益。具体细则建议就诊于正规医院营养科，制定合理的膳食方案。
肝癌可以吃红枣枸杞吗？	肝癌患者在饮食方面应尽量避免发霉变质、油腻、煎炸、烟熏、腌制、辛辣刺激、过于坚硬易划伤消化道等食物的摄取，其他无明确的禁忌，日常食物均可食用。在饮食方面可注意以下几点：1、满足热量需求，均衡膳食：恶性肿瘤是消耗性疾病，热量充足可以减少体内蛋白质的消耗，均衡膳食可以补充营养，增强体质；2、多食低脂和富含蛋白质的食物如瘦肉、鱼、禽蛋、奶制品、豆制品。注意在肝癌晚期肝功能明显异常时，要控制蛋白质的摄入，以免过多进食蛋白质诱发肝性脑病；3、多食富含维生素和膳食纤维的食物，主要见于各种水果和新鲜蔬菜，可起到辅助抗肿瘤作用。4、中药方面的食物应咨询正规中医科医生在其指导下服用。合理均衡的饮食对改善患者的预后有益。具体细则建议就诊于正规医院营养科，制定合理的膳食方案。
肝癌可以吃虫草花吗？	肝癌患者在饮食方面应尽量避免发霉变质、油腻、煎炸、烟熏、腌制、辛辣刺激、过于坚硬易划伤消化道等食物的摄取，其他无明确的禁忌，日常食物均可食用。在饮食方面可注意以下几点：1、满足热量需求，均衡膳食：恶性肿瘤是消耗性疾病，热量充足可以减少体内蛋白质的消耗，均衡膳食可以补充营养，增强体质；2、多食低脂和富含蛋白质的食物如瘦肉、鱼、禽蛋、奶制品、豆制品。注意在肝癌晚期肝功能明显异常时，要控制蛋白质的摄入，以免过多进食蛋白质诱发肝性脑病；3、多食富含维生素和膳食纤维的食物，主要见于各种水果和新鲜蔬菜，可起到辅助抗肿瘤作用。4、中药方面的食物应咨询正规中医科医生在其指导下服用。合理均衡的饮食对改善患者的预后有益。具体细则建议就诊于正规医院营养科，制定合理的膳食方案。
肝癌能吃公鸡肉吗？	肝癌患者在饮食方面应尽量避免发霉变质、油腻、煎炸、烟熏、腌制、辛辣刺激、过于坚硬易划伤消化道等食物的摄取，其他无明确的禁忌，日常食物均可食用。在饮食方面可注意以下几点：1、满足热量需求，均衡膳食：恶性肿瘤是消耗性疾病，热量充足可以减少体内蛋白质的消耗，均衡膳食可以补充营养，增强体质；2、多食低脂和富含蛋白质的食物如瘦肉、鱼、禽蛋、奶制品、豆制品。注意在肝癌晚期肝功能明显异常时，要控制蛋白质的摄入，以免过多进食蛋白质诱发肝性脑病；3、多食富含维生素和膳食纤维的食物，主要见于各种水果和新鲜蔬菜，可起到辅助抗肿瘤作用。4、中药方面的食物应咨询正规中医科医生在其指导下服用。合理均衡的饮食对改善患者的预后有益。具体细则建议就诊于正规医院营养科，制定合理的膳食方案。
有肝癌症的人能吃黄豆芽吗	肝癌患者在饮食方面应尽量避免发霉变质、油腻、煎炸、烟熏、腌制、辛辣刺激、过于坚硬易划伤消化道等食物的摄取，其他无明确的禁忌，日常食物均可食用。在饮食方面可注意以下几点：1、满足热量需求，均衡膳食：恶性肿瘤是消耗性疾病，热量充足可以减少体内蛋白质的消耗，均衡膳食可以补充营养，增强体质；2、多食低脂和富含蛋白质的食物如瘦肉、鱼、禽蛋、奶制品、豆制品。注意在肝癌晚期肝功能明显异常时，要控制蛋白质的摄入，以免过多进食蛋白质诱发肝性脑病；3、多食富含维生素和膳食纤维的食物，主要见于各种水果和新鲜蔬菜，可起到辅助抗肿瘤作用。4、中药方面的食物应咨询正规中医科医生在其指导下服用。合理均衡的饮食对改善患者的预后有益。具体细则建议就诊于正规医院营养科，制定合理的膳食方案。
有肝癌病之后能吃豆类食物吗？	肝癌患者在饮食方面应尽量避免发霉变质、油腻、煎炸、烟熏、腌制、辛辣刺激、过于坚硬易划伤消化道等食物的摄取，其他无明确的禁忌，日常食物均可食用。在饮食方面可注意以下几点：1、满足热量需求，均衡膳食：恶性肿瘤是消耗性疾病，热量充足可以减少体内蛋白质的消耗，均衡膳食可以补充营养，增强体质；2、多食低脂和富含蛋白质的食物如瘦肉、鱼、禽蛋、奶制品、豆制品。注意在肝癌晚期肝功能明显异常时，要控制蛋白质的摄入，以免过多进食蛋白质诱发肝性脑病；3、多食富含维生素和膳食纤维的食物，主要见于各种水果和新鲜蔬菜，可起到辅助抗肿瘤作用。4、中药方面的食物应咨询正规中医科医生在其指导下服用。合理均衡的饮食对改善患者的预后有益。具体细则建议就诊于正规医院营养科，制定合理的膳食方案。
肝癌晚期能吃蛋白粉吗？	肝癌患者在饮食方面应尽量避免发霉变质、油腻、煎炸、烟熏、腌制、辛辣刺激、过于坚硬易划伤消化道等食物的摄取，其他无明确的禁忌，日常食物均可食用。在饮食方面可注意以下几点：1、满足热量需求，均衡膳食：恶性肿瘤是消耗性疾病，热量充足可以减少体内蛋白质的消耗，均衡膳食可以补充营养，增强体质；2、多食低脂和富含蛋白质的食物如瘦肉、鱼、禽蛋、奶制品、豆制品。注意在肝癌晚期肝功能明显异常时，要控制蛋白质的摄入，以免过多进食蛋白质诱发肝性脑病；3、多食富含维生素和膳食纤维的食物，主要见于各种水果和新鲜蔬菜，可起到辅助抗肿瘤作用。4、中药方面的食物应咨询正规中医科医生在其指导下服用。合理均衡的饮食对改善患者的预后有益。具体细则建议就诊于正规医院营养科，制定合理的膳食方案。
肝癌晚期能吃橘子吗	肝癌患者在饮食方面应尽量避免发霉变质、油腻、煎炸、烟熏、腌制、辛辣刺激、过于坚硬易划伤消化道等食物的摄取，其他无明确的禁忌，日常食物均可食用。在饮食方面可注意以下几点：1、满足热量需求，均衡膳食：恶性肿瘤是消耗性疾病，热量充足可以减少体内蛋白质的消耗，均衡膳食可以补充营养，增强体质；2、多食低脂和富含蛋白质的食物如瘦肉、鱼、禽蛋、奶制品、豆制品。注意在肝癌晚期肝功能明显异常时，要控制蛋白质的摄入，以免过多进食蛋白质诱发肝性脑病；3、多食富含维生素和膳食纤维的食物，主要见于各种水果和新鲜蔬菜，可起到辅助抗肿瘤作用。4、中药方面的食物应咨询正规中医科医生在其指导下服用。合理均衡的饮食对改善患者的预后有益。具体细则建议就诊于正规医院营养科，制定合理的膳食方案。
肝癌晚期能吃山竹吗	肝癌患者在饮食方面应尽量避免发霉变质、油腻、煎炸、烟熏、腌制、辛辣刺激、过于坚硬易划伤消化道等食物的摄取，其他无明确的禁忌，日常食物均可食用。在饮食方面可注意以下几点：1、满足热量需求，均衡膳食：恶性肿瘤是消耗性疾病，热量充足可以减少体内蛋白质的消耗，均衡膳食可以补充营养，增强体质；2、多食低脂和富含蛋白质的食物如瘦肉、鱼、禽蛋、奶制品、豆制品。注意在肝癌晚期肝功能明显异常时，要控制蛋白质的摄入，以免过多进食蛋白质诱发肝性脑病；3、多食富含维生素和膳食纤维的食物，主要见于各种水果和新鲜蔬菜，可起到辅助抗肿瘤作用。4、中药方面的食物应咨询正规中医科医生在其指导下服用。合理均衡的饮食对改善患者的预后有益。具体细则建议就诊于正规医院营养科，制定合理的膳食方案。
肝癌晚期能吃龙眼吗	肝癌患者在饮食方面应尽量避免发霉变质、油腻、煎炸、烟熏、腌制、辛辣刺激、过于坚硬易划伤消化道等食物的摄取，其他无明确的禁忌，日常食物均可食用。在饮食方面可注意以下几点：1、满足热量需求，均衡膳食：恶性肿瘤是消耗性疾病，热量充足可以减少体内蛋白质的消耗，均衡膳食可以补充营养，增强体质；2、多食低脂和富含蛋白质的食物如瘦肉、鱼、禽蛋、奶制品、豆制品。注意在肝癌晚期肝功能明显异常时，要控制蛋白质的摄入，以免过多进食蛋白质诱发肝性脑病；3、多食富含维生素和膳食纤维的食物，主要见于各种水果和新鲜蔬菜，可起到辅助抗肿瘤作用。4、中药方面的食物应咨询正规中医科医生在其指导下服用。合理均衡的饮食对改善患者的预后有益。具体细则建议就诊于正规医院营养科，制定合理的膳食方案。
肝癌晚期能吃红萝卜吗？	肝癌患者在饮食方面应尽量避免发霉变质、油腻、煎炸、烟熏、腌制、辛辣刺激、过于坚硬易划伤消化道等食物的摄取，其他无明确的禁忌，日常食物均可食用。在饮食方面可注意以下几点：1、满足热量需求，均衡膳食：恶性肿瘤是消耗性疾病，热量充足可以减少体内蛋白质的消耗，均衡膳食可以补充营养，增强体质；2、多食低脂和富含蛋白质的食物如瘦肉、鱼、禽蛋、奶制品、豆制品。注意在肝癌晚期肝功能明显异常时，要控制蛋白质的摄入，以免过多进食蛋白质诱发肝性脑病；3、多食富含维生素和膳食纤维的食物，主要见于各种水果和新鲜蔬菜，可起到辅助抗肿瘤作用。4、中药方面的食物应咨询正规中医科医生在其指导下服用。合理均衡的饮食对改善患者的预后有益。具体细则建议就诊于正规医院营养科，制定合理的膳食方案。
肝癌晚期可以吃人参皂苷么	肝癌患者在饮食方面应尽量避免发霉变质、油腻、煎炸、烟熏、腌制、辛辣刺激、过于坚硬易划伤消化道等食物的摄取，其他无明确的禁忌，日常食物均可食用。在饮食方面可注意以下几点：1、满足热量需求，均衡膳食：恶性肿瘤是消耗性疾病，热量充足可以减少体内蛋白质的消耗，均衡膳食可以补充营养，增强体质；2、多食低脂和富含蛋白质的食物如瘦肉、鱼、禽蛋、奶制品、豆制品。注意在肝癌晚期肝功能明显异常时，要控制蛋白质的摄入，以免过多进食蛋白质诱发肝性脑病；3、多食富含维生素和膳食纤维的食物，主要见于各种水果和新鲜蔬菜，可起到辅助抗肿瘤作用。4、中药方面的食物应咨询正规中医科医生在其指导下服用。合理均衡的饮食对改善患者的预后有益。具体细则建议就诊于正规医院营养科，制定合理的膳食方案。
肝癌晚期可以吃西洋参吗	肝癌患者在饮食方面应尽量避免发霉变质、油腻、煎炸、烟熏、腌制、辛辣刺激、过于坚硬易划伤消化道等食物的摄取，其他无明确的禁忌，日常食物均可食用。在饮食方面可注意以下几点：1、满足热量需求，均衡膳食：恶性肿瘤是消耗性疾病，热量充足可以减少体内蛋白质的消耗，均衡膳食可以补充营养，增强体质；2、多食低脂和富含蛋白质的食物如瘦肉、鱼、禽蛋、奶制品、豆制品。注意在肝癌晚期肝功能明显异常时，要控制蛋白质的摄入，以免过多进食蛋白质诱发肝性脑病；3、多食富含维生素和膳食纤维的食物，主要见于各种水果和新鲜蔬菜，可起到辅助抗肿瘤作用。4、中药方面的食物应咨询正规中医科医生在其指导下服用。合理均衡的饮食对改善患者的预后有益。具体细则建议就诊于正规医院营养科，制定合理的膳食方案。
肝癌晚期能吃羊肉吗?	肝癌患者在饮食方面应尽量避免发霉变质、油腻、煎炸、烟熏、腌制、辛辣刺激、过于坚硬易划伤消化道等食物的摄取，其他无明确的禁忌，日常食物均可食用。在饮食方面可注意以下几点：1、满足热量需求，均衡膳食：恶性肿瘤是消耗性疾病，热量充足可以减少体内蛋白质的消耗，均衡膳食可以补充营养，增强体质；2、多食低脂和富含蛋白质的食物如瘦肉、鱼、禽蛋、奶制品、豆制品。注意在肝癌晚期肝功能明显异常时，要控制蛋白质的摄入，以免过多进食蛋白质诱发肝性脑病；3、多食富含维生素和膳食纤维的食物，主要见于各种水果和新鲜蔬菜，可起到辅助抗肿瘤作用。4、中药方面的食物应咨询正规中医科医生在其指导下服用。合理均衡的饮食对改善患者的预后有益。具体细则建议就诊于正规医院营养科，制定合理的膳食方案。
肝癌晚期能吃鱼吗?	肝癌患者在饮食方面应尽量避免发霉变质、油腻、煎炸、烟熏、腌制、辛辣刺激、过于坚硬易划伤消化道等食物的摄取，其他无明确的禁忌，日常食物均可食用。在饮食方面可注意以下几点：1、满足热量需求，均衡膳食：恶性肿瘤是消耗性疾病，热量充足可以减少体内蛋白质的消耗，均衡膳食可以补充营养，增强体质；2、多食低脂和富含蛋白质的食物如瘦肉、鱼、禽蛋、奶制品、豆制品。注意在肝癌晚期肝功能明显异常时，要控制蛋白质的摄入，以免过多进食蛋白质诱发肝性脑病；3、多食富含维生素和膳食纤维的食物，主要见于各种水果和新鲜蔬菜，可起到辅助抗肿瘤作用。4、中药方面的食物应咨询正规中医科医生在其指导下服用。合理均衡的饮食对改善患者的预后有益。具体细则建议就诊于正规医院营养科，制定合理的膳食方案。
肝癌晚期能吃阿胶吗?	肝癌患者在饮食方面应尽量避免发霉变质、油腻、煎炸、烟熏、腌制、辛辣刺激、过于坚硬易划伤消化道等食物的摄取，其他无明确的禁忌，日常食物均可食用。在饮食方面可注意以下几点：1、满足热量需求，均衡膳食：恶性肿瘤是消耗性疾病，热量充足可以减少体内蛋白质的消耗，均衡膳食可以补充营养，增强体质；2、多食低脂和富含蛋白质的食物如瘦肉、鱼、禽蛋、奶制品、豆制品。注意在肝癌晚期肝功能明显异常时，要控制蛋白质的摄入，以免过多进食蛋白质诱发肝性脑病；3、多食富含维生素和膳食纤维的食物，主要见于各种水果和新鲜蔬菜，可起到辅助抗肿瘤作用。4、中药方面的食物应咨询正规中医科医生在其指导下服用。合理均衡的饮食对改善患者的预后有益。具体细则建议就诊于正规医院营养科，制定合理的膳食方案。
肝癌晚期能吃山竹有好处么	肝癌患者在饮食方面应尽量避免发霉变质、油腻、煎炸、烟熏、腌制、辛辣刺激、过于坚硬易划伤消化道等食物的摄取，其他无明确的禁忌，日常食物均可食用。在饮食方面可注意以下几点：1、满足热量需求，均衡膳食：恶性肿瘤是消耗性疾病，热量充足可以减少体内蛋白质的消耗，均衡膳食可以补充营养，增强体质；2、多食低脂和富含蛋白质的食物如瘦肉、鱼、禽蛋、奶制品、豆制品。注意在肝癌晚期肝功能明显异常时，要控制蛋白质的摄入，以免过多进食蛋白质诱发肝性脑病；3、多食富含维生素和膳食纤维的食物，主要见于各种水果和新鲜蔬菜，可起到辅助抗肿瘤作用。4、中药方面的食物应咨询正规中医科医生在其指导下服用。合理均衡的饮食对改善患者的预后有益。具体细则建议就诊于正规医院营养科，制定合理的膳食方案。
肝癌晚期可以吃阿胶吗会不会有什么不良反应	肝癌患者在饮食方面应尽量避免发霉变质、油腻、煎炸、烟熏、腌制、辛辣刺激、过于坚硬易划伤消化道等食物的摄取，其他无明确的禁忌，日常食物均可食用。在饮食方面可注意以下几点：1、满足热量需求，均衡膳食：恶性肿瘤是消耗性疾病，热量充足可以减少体内蛋白质的消耗，均衡膳食可以补充营养，增强体质；2、多食低脂和富含蛋白质的食物如瘦肉、鱼、禽蛋、奶制品、豆制品。注意在肝癌晚期肝功能明显异常时，要控制蛋白质的摄入，以免过多进食蛋白质诱发肝性脑病；3、多食富含维生素和膳食纤维的食物，主要见于各种水果和新鲜蔬菜，可起到辅助抗肿瘤作用。4、中药方面的食物应咨询正规中医科医生在其指导下服用。合理均衡的饮食对改善患者的预后有益。具体细则建议就诊于正规医院营养科，制定合理的膳食方案。
肝癌晚期能吃蜂王浆吗？	肝癌患者在饮食方面应尽量避免发霉变质、油腻、煎炸、烟熏、腌制、辛辣刺激、过于坚硬易划伤消化道等食物的摄取，其他无明确的禁忌，日常食物均可食用。在饮食方面可注意以下几点：1、满足热量需求，均衡膳食：恶性肿瘤是消耗性疾病，热量充足可以减少体内蛋白质的消耗，均衡膳食可以补充营养，增强体质；2、多食低脂和富含蛋白质的食物如瘦肉、鱼、禽蛋、奶制品、豆制品。注意在肝癌晚期肝功能明显异常时，要控制蛋白质的摄入，以免过多进食蛋白质诱发肝性脑病；3、多食富含维生素和膳食纤维的食物，主要见于各种水果和新鲜蔬菜，可起到辅助抗肿瘤作用。4、中药方面的食物应咨询正规中医科医生在其指导下服用。合理均衡的饮食对改善患者的预后有益。具体细则建议就诊于正规医院营养科，制定合理的膳食方案。
肝癌晚期能吃榴莲吗？	肝癌患者在饮食方面应尽量避免发霉变质、油腻、煎炸、烟熏、腌制、辛辣刺激、过于坚硬易划伤消化道等食物的摄取，其他无明确的禁忌，日常食物均可食用。在饮食方面可注意以下几点：1、满足热量需求，均衡膳食：恶性肿瘤是消耗性疾病，热量充足可以减少体内蛋白质的消耗，均衡膳食可以补充营养，增强体质；2、多食低脂和富含蛋白质的食物如瘦肉、鱼、禽蛋、奶制品、豆制品。注意在肝癌晚期肝功能明显异常时，要控制蛋白质的摄入，以免过多进食蛋白质诱发肝性脑病；3、多食富含维生素和膳食纤维的食物，主要见于各种水果和新鲜蔬菜，可起到辅助抗肿瘤作用。4、中药方面的食物应咨询正规中医科医生在其指导下服用。合理均衡的饮食对改善患者的预后有益。具体细则建议就诊于正规医院营养科，制定合理的膳食方案。
肝癌晚期能吃坚果吗	肝癌患者在饮食方面应尽量避免发霉变质、油腻、煎炸、烟熏、腌制、辛辣刺激、过于坚硬易划伤消化道等食物的摄取，其他无明确的禁忌，日常食物均可食用。在饮食方面可注意以下几点：1、满足热量需求，均衡膳食：恶性肿瘤是消耗性疾病，热量充足可以减少体内蛋白质的消耗，均衡膳食可以补充营养，增强体质；2、多食低脂和富含蛋白质的食物如瘦肉、鱼、禽蛋、奶制品、豆制品。注意在肝癌晚期肝功能明显异常时，要控制蛋白质的摄入，以免过多进食蛋白质诱发肝性脑病；3、多食富含维生素和膳食纤维的食物，主要见于各种水果和新鲜蔬菜，可起到辅助抗肿瘤作用。4、中药方面的食物应咨询正规中医科医生在其指导下服用。合理均衡的饮食对改善患者的预后有益。具体细则建议就诊于正规医院营养科，制定合理的膳食方案。
肝癌晚期能吃麦片吗？	肝癌患者在饮食方面应尽量避免发霉变质、油腻、煎炸、烟熏、腌制、辛辣刺激、过于坚硬易划伤消化道等食物的摄取，其他无明确的禁忌，日常食物均可食用。在饮食方面可注意以下几点：1、满足热量需求，均衡膳食：恶性肿瘤是消耗性疾病，热量充足可以减少体内蛋白质的消耗，均衡膳食可以补充营养，增强体质；2、多食低脂和富含蛋白质的食物如瘦肉、鱼、禽蛋、奶制品、豆制品。注意在肝癌晚期肝功能明显异常时，要控制蛋白质的摄入，以免过多进食蛋白质诱发肝性脑病；3、多食富含维生素和膳食纤维的食物，主要见于各种水果和新鲜蔬菜，可起到辅助抗肿瘤作用。4、中药方面的食物应咨询正规中医科医生在其指导下服用。合理均衡的饮食对改善患者的预后有益。具体细则建议就诊于正规医院营养科，制定合理的膳食方案。
肝癌晚期能喝羊肉汤吗？	肝癌患者在饮食方面应尽量避免发霉变质、油腻、煎炸、烟熏、腌制、辛辣刺激、过于坚硬易划伤消化道等食物的摄取，其他无明确的禁忌，日常食物均可食用。在饮食方面可注意以下几点：1、满足热量需求，均衡膳食：恶性肿瘤是消耗性疾病，热量充足可以减少体内蛋白质的消耗，均衡膳食可以补充营养，增强体质；2、多食低脂和富含蛋白质的食物如瘦肉、鱼、禽蛋、奶制品、豆制品。注意在肝癌晚期肝功能明显异常时，要控制蛋白质的摄入，以免过多进食蛋白质诱发肝性脑病；3、多食富含维生素和膳食纤维的食物，主要见于各种水果和新鲜蔬菜，可起到辅助抗肿瘤作用。4、中药方面的食物应咨询正规中医科医生在其指导下服用。合理均衡的饮食对改善患者的预后有益。具体细则建议就诊于正规医院营养科，制定合理的膳食方案。
肝癌晚期可以吃蛋白质吗	肝癌患者在饮食方面应尽量避免发霉变质、油腻、煎炸、烟熏、腌制、辛辣刺激、过于坚硬易划伤消化道等食物的摄取，其他无明确的禁忌，日常食物均可食用。在饮食方面可注意以下几点：1、满足热量需求，均衡膳食：恶性肿瘤是消耗性疾病，热量充足可以减少体内蛋白质的消耗，均衡膳食可以补充营养，增强体质；2、多食低脂和富含蛋白质的食物如瘦肉、鱼、禽蛋、奶制品、豆制品。注意在肝癌晚期肝功能明显异常时，要控制蛋白质的摄入，以免过多进食蛋白质诱发肝性脑病；3、多食富含维生素和膳食纤维的食物，主要见于各种水果和新鲜蔬菜，可起到辅助抗肿瘤作用。4、中药方面的食物应咨询正规中医科医生在其指导下服用。合理均衡的饮食对改善患者的预后有益。具体细则建议就诊于正规医院营养科，制定合理的膳食方案。
肝癌晚期能喝绿茶吗？	肝癌患者在饮食方面应尽量避免发霉变质、油腻、煎炸、烟熏、腌制、辛辣刺激、过于坚硬易划伤消化道等食物的摄取，其他无明确的禁忌，日常食物均可食用。在饮食方面可注意以下几点：1、满足热量需求，均衡膳食：恶性肿瘤是消耗性疾病，热量充足可以减少体内蛋白质的消耗，均衡膳食可以补充营养，增强体质；2、多食低脂和富含蛋白质的食物如瘦肉、鱼、禽蛋、奶制品、豆制品。注意在肝癌晚期肝功能明显异常时，要控制蛋白质的摄入，以免过多进食蛋白质诱发肝性脑病；3、多食富含维生素和膳食纤维的食物，主要见于各种水果和新鲜蔬菜，可起到辅助抗肿瘤作用。4、中药方面的食物应咨询正规中医科医生在其指导下服用。合理均衡的饮食对改善患者的预后有益。具体细则建议就诊于正规医院营养科，制定合理的膳食方案。
肝癌晚期可以吃绿豆芽吗	肝癌患者在饮食方面应尽量避免发霉变质、油腻、煎炸、烟熏、腌制、辛辣刺激、过于坚硬易划伤消化道等食物的摄取，其他无明确的禁忌，日常食物均可食用。在饮食方面可注意以下几点：1、满足热量需求，均衡膳食：恶性肿瘤是消耗性疾病，热量充足可以减少体内蛋白质的消耗，均衡膳食可以补充营养，增强体质；2、多食低脂和富含蛋白质的食物如瘦肉、鱼、禽蛋、奶制品、豆制品。注意在肝癌晚期肝功能明显异常时，要控制蛋白质的摄入，以免过多进食蛋白质诱发肝性脑病；3、多食富含维生素和膳食纤维的食物，主要见于各种水果和新鲜蔬菜，可起到辅助抗肿瘤作用。4、中药方面的食物应咨询正规中医科医生在其指导下服用。合理均衡的饮食对改善患者的预后有益。具体细则建议就诊于正规医院营养科，制定合理的膳食方案。
肝癌晚期能吃萝卜吗？	肝癌患者在饮食方面应尽量避免发霉变质、油腻、煎炸、烟熏、腌制、辛辣刺激、过于坚硬易划伤消化道等食物的摄取，其他无明确的禁忌，日常食物均可食用。在饮食方面可注意以下几点：1、满足热量需求，均衡膳食：恶性肿瘤是消耗性疾病，热量充足可以减少体内蛋白质的消耗，均衡膳食可以补充营养，增强体质；2、多食低脂和富含蛋白质的食物如瘦肉、鱼、禽蛋、奶制品、豆制品。注意在肝癌晚期肝功能明显异常时，要控制蛋白质的摄入，以免过多进食蛋白质诱发肝性脑病；3、多食富含维生素和膳食纤维的食物，主要见于各种水果和新鲜蔬菜，可起到辅助抗肿瘤作用。4、中药方面的食物应咨询正规中医科医生在其指导下服用。合理均衡的饮食对改善患者的预后有益。具体细则建议就诊于正规医院营养科，制定合理的膳食方案。
肝癌晚期能吃人参吗？	肝癌患者在饮食方面应尽量避免发霉变质、油腻、煎炸、烟熏、腌制、辛辣刺激、过于坚硬易划伤消化道等食物的摄取，其他无明确的禁忌，日常食物均可食用。在饮食方面可注意以下几点：1、满足热量需求，均衡膳食：恶性肿瘤是消耗性疾病，热量充足可以减少体内蛋白质的消耗，均衡膳食可以补充营养，增强体质；2、多食低脂和富含蛋白质的食物如瘦肉、鱼、禽蛋、奶制品、豆制品。注意在肝癌晚期肝功能明显异常时，要控制蛋白质的摄入，以免过多进食蛋白质诱发肝性脑病；3、多食富含维生素和膳食纤维的食物，主要见于各种水果和新鲜蔬菜，可起到辅助抗肿瘤作用。4、中药方面的食物应咨询正规中医科医生在其指导下服用。合理均衡的饮食对改善患者的预后有益。具体细则建议就诊于正规医院营养科，制定合理的膳食方案。
肝癌晚期能喝蒲公英吗?	肝癌患者在饮食方面应尽量避免发霉变质、油腻、煎炸、烟熏、腌制、辛辣刺激、过于坚硬易划伤消化道等食物的摄取，其他无明确的禁忌，日常食物均可食用。在饮食方面可注意以下几点：1、满足热量需求，均衡膳食：恶性肿瘤是消耗性疾病，热量充足可以减少体内蛋白质的消耗，均衡膳食可以补充营养，增强体质；2、多食低脂和富含蛋白质的食物如瘦肉、鱼、禽蛋、奶制品、豆制品。注意在肝癌晚期肝功能明显异常时，要控制蛋白质的摄入，以免过多进食蛋白质诱发肝性脑病；3、多食富含维生素和膳食纤维的食物，主要见于各种水果和新鲜蔬菜，可起到辅助抗肿瘤作用。4、中药方面的食物应咨询正规中医科医生在其指导下服用。合理均衡的饮食对改善患者的预后有益。具体细则建议就诊于正规医院营养科，制定合理的膳食方案。
肝癌晚期能吃香蕉吗	肝癌患者在饮食方面应尽量避免发霉变质、油腻、煎炸、烟熏、腌制、辛辣刺激、过于坚硬易划伤消化道等食物的摄取，其他无明确的禁忌，日常食物均可食用。在饮食方面可注意以下几点：1、满足热量需求，均衡膳食：恶性肿瘤是消耗性疾病，热量充足可以减少体内蛋白质的消耗，均衡膳食可以补充营养，增强体质；2、多食低脂和富含蛋白质的食物如瘦肉、鱼、禽蛋、奶制品、豆制品。注意在肝癌晚期肝功能明显异常时，要控制蛋白质的摄入，以免过多进食蛋白质诱发肝性脑病；3、多食富含维生素和膳食纤维的食物，主要见于各种水果和新鲜蔬菜，可起到辅助抗肿瘤作用。4、中药方面的食物应咨询正规中医科医生在其指导下服用。合理均衡的饮食对改善患者的预后有益。具体细则建议就诊于正规医院营养科，制定合理的膳食方案。
肝癌晚期能喝豆浆吗？	肝癌患者在饮食方面应尽量避免发霉变质、油腻、煎炸、烟熏、腌制、辛辣刺激、过于坚硬易划伤消化道等食物的摄取，其他无明确的禁忌，日常食物均可食用。在饮食方面可注意以下几点：1、满足热量需求，均衡膳食：恶性肿瘤是消耗性疾病，热量充足可以减少体内蛋白质的消耗，均衡膳食可以补充营养，增强体质；2、多食低脂和富含蛋白质的食物如瘦肉、鱼、禽蛋、奶制品、豆制品。注意在肝癌晚期肝功能明显异常时，要控制蛋白质的摄入，以免过多进食蛋白质诱发肝性脑病；3、多食富含维生素和膳食纤维的食物，主要见于各种水果和新鲜蔬菜，可起到辅助抗肿瘤作用。4、中药方面的食物应咨询正规中医科医生在其指导下服用。合理均衡的饮食对改善患者的预后有益。具体细则建议就诊于正规医院营养科，制定合理的膳食方案。
肝癌晚期能吃黄鳝吗	肝癌患者在饮食方面应尽量避免发霉变质、油腻、煎炸、烟熏、腌制、辛辣刺激、过于坚硬易划伤消化道等食物的摄取，其他无明确的禁忌，日常食物均可食用。在饮食方面可注意以下几点：1、满足热量需求，均衡膳食：恶性肿瘤是消耗性疾病，热量充足可以减少体内蛋白质的消耗，均衡膳食可以补充营养，增强体质；2、多食低脂和富含蛋白质的食物如瘦肉、鱼、禽蛋、奶制品、豆制品。注意在肝癌晚期肝功能明显异常时，要控制蛋白质的摄入，以免过多进食蛋白质诱发肝性脑病；3、多食富含维生素和膳食纤维的食物，主要见于各种水果和新鲜蔬菜，可起到辅助抗肿瘤作用。4、中药方面的食物应咨询正规中医科医生在其指导下服用。合理均衡的饮食对改善患者的预后有益。具体细则建议就诊于正规医院营养科，制定合理的膳食方案。
肝癌晚期能吃大萝卜吗？	肝癌患者在饮食方面应尽量避免发霉变质、油腻、煎炸、烟熏、腌制、辛辣刺激、过于坚硬易划伤消化道等食物的摄取，其他无明确的禁忌，日常食物均可食用。在饮食方面可注意以下几点：1、满足热量需求，均衡膳食：恶性肿瘤是消耗性疾病，热量充足可以减少体内蛋白质的消耗，均衡膳食可以补充营养，增强体质；2、多食低脂和富含蛋白质的食物如瘦肉、鱼、禽蛋、奶制品、豆制品。注意在肝癌晚期肝功能明显异常时，要控制蛋白质的摄入，以免过多进食蛋白质诱发肝性脑病；3、多食富含维生素和膳食纤维的食物，主要见于各种水果和新鲜蔬菜，可起到辅助抗肿瘤作用。4、中药方面的食物应咨询正规中医科医生在其指导下服用。合理均衡的饮食对改善患者的预后有益。具体细则建议就诊于正规医院营养科，制定合理的膳食方案。
肝癌晚期能吃芒果吗?	肝癌患者在饮食方面应尽量避免发霉变质、油腻、煎炸、烟熏、腌制、辛辣刺激、过于坚硬易划伤消化道等食物的摄取，其他无明确的禁忌，日常食物均可食用。在饮食方面可注意以下几点：1、满足热量需求，均衡膳食：恶性肿瘤是消耗性疾病，热量充足可以减少体内蛋白质的消耗，均衡膳食可以补充营养，增强体质；2、多食低脂和富含蛋白质的食物如瘦肉、鱼、禽蛋、奶制品、豆制品。注意在肝癌晚期肝功能明显异常时，要控制蛋白质的摄入，以免过多进食蛋白质诱发肝性脑病；3、多食富含维生素和膳食纤维的食物，主要见于各种水果和新鲜蔬菜，可起到辅助抗肿瘤作用。4、中药方面的食物应咨询正规中医科医生在其指导下服用。合理均衡的饮食对改善患者的预后有益。具体细则建议就诊于正规医院营养科，制定合理的膳食方案。
肝癌能吃鳝鱼和泥鳅吗	肝癌患者在饮食方面应尽量避免发霉变质、油腻、煎炸、烟熏、腌制、辛辣刺激、过于坚硬易划伤消化道等食物的摄取，其他无明确的禁忌，日常食物均可食用。在饮食方面可注意以下几点：1、满足热量需求，均衡膳食：恶性肿瘤是消耗性疾病，热量充足可以减少体内蛋白质的消耗，均衡膳食可以补充营养，增强体质；2、多食低脂和富含蛋白质的食物如瘦肉、鱼、禽蛋、奶制品、豆制品。注意在肝癌晚期肝功能明显异常时，要控制蛋白质的摄入，以免过多进食蛋白质诱发肝性脑病；3、多食富含维生素和膳食纤维的食物，主要见于各种水果和新鲜蔬菜，可起到辅助抗肿瘤作用。4、中药方面的食物应咨询正规中医科医生在其指导下服用。合理均衡的饮食对改善患者的预后有益。具体细则建议就诊于正规医院营养科，制定合理的膳食方案。
肝癌能吃黑芝麻糊么、？	肝癌患者在饮食方面应尽量避免发霉变质、油腻、煎炸、烟熏、腌制、辛辣刺激、过于坚硬易划伤消化道等食物的摄取，其他无明确的禁忌，日常食物均可食用。在饮食方面可注意以下几点：1、满足热量需求，均衡膳食：恶性肿瘤是消耗性疾病，热量充足可以减少体内蛋白质的消耗，均衡膳食可以补充营养，增强体质；2、多食低脂和富含蛋白质的食物如瘦肉、鱼、禽蛋、奶制品、豆制品。注意在肝癌晚期肝功能明显异常时，要控制蛋白质的摄入，以免过多进食蛋白质诱发肝性脑病；3、多食富含维生素和膳食纤维的食物，主要见于各种水果和新鲜蔬菜，可起到辅助抗肿瘤作用。4、中药方面的食物应咨询正规中医科医生在其指导下服用。合理均衡的饮食对改善患者的预后有益。具体细则建议就诊于正规医院营养科，制定合理的膳食方案。
肝癌能不能吃甜食品？	肝癌患者在饮食方面应尽量避免发霉变质、油腻、煎炸、烟熏、腌制、辛辣刺激、过于坚硬易划伤消化道等食物的摄取，其他无明确的禁忌，日常食物均可食用。在饮食方面可注意以下几点：1、满足热量需求，均衡膳食：恶性肿瘤是消耗性疾病，热量充足可以减少体内蛋白质的消耗，均衡膳食可以补充营养，增强体质；2、多食低脂和富含蛋白质的食物如瘦肉、鱼、禽蛋、奶制品、豆制品。注意在肝癌晚期肝功能明显异常时，要控制蛋白质的摄入，以免过多进食蛋白质诱发肝性脑病；3、多食富含维生素和膳食纤维的食物，主要见于各种水果和新鲜蔬菜，可起到辅助抗肿瘤作用。4、中药方面的食物应咨询正规中医科医生在其指导下服用。合理均衡的饮食对改善患者的预后有益。具体细则建议就诊于正规医院营养科，制定合理的膳食方案。
肝癌能吃新鲜排骨.土鸡和鱼吗？	肝癌患者在饮食方面应尽量避免发霉变质、油腻、煎炸、烟熏、腌制、辛辣刺激、过于坚硬易划伤消化道等食物的摄取，其他无明确的禁忌，日常食物均可食用。在饮食方面可注意以下几点：1、满足热量需求，均衡膳食：恶性肿瘤是消耗性疾病，热量充足可以减少体内蛋白质的消耗，均衡膳食可以补充营养，增强体质；2、多食低脂和富含蛋白质的食物如瘦肉、鱼、禽蛋、奶制品、豆制品。注意在肝癌晚期肝功能明显异常时，要控制蛋白质的摄入，以免过多进食蛋白质诱发肝性脑病；3、多食富含维生素和膳食纤维的食物，主要见于各种水果和新鲜蔬菜，可起到辅助抗肿瘤作用。4、中药方面的食物应咨询正规中医科医生在其指导下服用。合理均衡的饮食对改善患者的预后有益。具体细则建议就诊于正规医院营养科，制定合理的膳食方案。
肝癌吃什么水果比较好	肝癌患者在饮食方面应尽量避免发霉变质、油腻、煎炸、烟熏、腌制、辛辣刺激、过于坚硬易划伤消化道等食物的摄取，其他无明确的禁忌，日常食物均可食用。在饮食方面可注意以下几点：1、满足热量需求，均衡膳食：恶性肿瘤是消耗性疾病，热量充足可以减少体内蛋白质的消耗，均衡膳食可以补充营养，增强体质；2、多食低脂和富含蛋白质的食物如瘦肉、鱼、禽蛋、奶制品、豆制品。注意在肝癌晚期肝功能明显异常时，要控制蛋白质的摄入，以免过多进食蛋白质诱发肝性脑病；3、多食富含维生素和膳食纤维的食物，主要见于各种水果和新鲜蔬菜，可起到辅助抗肿瘤作用。4、中药方面的食物应咨询正规中医科医生在其指导下服用。合理均衡的饮食对改善患者的预后有益。具体细则建议就诊于正规医院营养科，制定合理的膳食方案。
肝癌吃什么蔬菜	肝癌患者在饮食方面应尽量避免发霉变质、油腻、煎炸、烟熏、腌制、辛辣刺激、过于坚硬易划伤消化道等食物的摄取，其他无明确的禁忌，日常食物均可食用。在饮食方面可注意以下几点：1、满足热量需求，均衡膳食：恶性肿瘤是消耗性疾病，热量充足可以减少体内蛋白质的消耗，均衡膳食可以补充营养，增强体质；2、多食低脂和富含蛋白质的食物如瘦肉、鱼、禽蛋、奶制品、豆制品。注意在肝癌晚期肝功能明显异常时，要控制蛋白质的摄入，以免过多进食蛋白质诱发肝性脑病；3、多食富含维生素和膳食纤维的食物，主要见于各种水果和新鲜蔬菜，可起到辅助抗肿瘤作用。4、中药方面的食物应咨询正规中医科医生在其指导下服用。合理均衡的饮食对改善患者的预后有益。具体细则建议就诊于正规医院营养科，制定合理的膳食方案。
肝癌吃什么好	肝癌患者在饮食方面应尽量避免发霉变质、油腻、煎炸、烟熏、腌制、辛辣刺激、过于坚硬易划伤消化道等食物的摄取，其他无明确的禁忌，日常食物均可食用。在饮食方面可注意以下几点：1、满足热量需求，均衡膳食：恶性肿瘤是消耗性疾病，热量充足可以减少体内蛋白质的消耗，均衡膳食可以补充营养，增强体质；2、多食低脂和富含蛋白质的食物如瘦肉、鱼、禽蛋、奶制品、豆制品。注意在肝癌晚期肝功能明显异常时，要控制蛋白质的摄入，以免过多进食蛋白质诱发肝性脑病；3、多食富含维生素和膳食纤维的食物，主要见于各种水果和新鲜蔬菜，可起到辅助抗肿瘤作用。4、中药方面的食物应咨询正规中医科医生在其指导下服用。合理均衡的饮食对改善患者的预后有益。具体细则建议就诊于正规医院营养科，制定合理的膳食方案。
肝癌吃什么保健品	肝癌患者在饮食方面应尽量避免发霉变质、油腻、煎炸、烟熏、腌制、辛辣刺激、过于坚硬易划伤消化道等食物的摄取，其他无明确的禁忌，日常食物均可食用。在饮食方面可注意以下几点：1、满足热量需求，均衡膳食：恶性肿瘤是消耗性疾病，热量充足可以减少体内蛋白质的消耗，均衡膳食可以补充营养，增强体质；2、多食低脂和富含蛋白质的食物如瘦肉、鱼、禽蛋、奶制品、豆制品。注意在肝癌晚期肝功能明显异常时，要控制蛋白质的摄入，以免过多进食蛋白质诱发肝性脑病；3、多食富含维生素和膳食纤维的食物，主要见于各种水果和新鲜蔬菜，可起到辅助抗肿瘤作用。4、中药方面的食物应咨询正规中医科医生在其指导下服用。合理均衡的饮食对改善患者的预后有益。具体细则建议就诊于正规医院营养科，制定合理的膳食方案。
肝癌能吃什么水果?	肝癌患者在饮食方面应尽量避免发霉变质、油腻、煎炸、烟熏、腌制、辛辣刺激、过于坚硬易划伤消化道等食物的摄取，其他无明确的禁忌，日常食物均可食用。在饮食方面可注意以下几点：1、满足热量需求，均衡膳食：恶性肿瘤是消耗性疾病，热量充足可以减少体内蛋白质的消耗，均衡膳食可以补充营养，增强体质；2、多食低脂和富含蛋白质的食物如瘦肉、鱼、禽蛋、奶制品、豆制品。注意在肝癌晚期肝功能明显异常时，要控制蛋白质的摄入，以免过多进食蛋白质诱发肝性脑病；3、多食富含维生素和膳食纤维的食物，主要见于各种水果和新鲜蔬菜，可起到辅助抗肿瘤作用。4、中药方面的食物应咨询正规中医科医生在其指导下服用。合理均衡的饮食对改善患者的预后有益。具体细则建议就诊于正规医院营养科，制定合理的膳食方案。
肝癌不能吃什么东西？	肝癌患者在饮食方面应尽量避免发霉变质、油腻、煎炸、烟熏、腌制、辛辣刺激、过于坚硬易划伤消化道等食物的摄取，其他无明确的禁忌，日常食物均可食用。在饮食方面可注意以下几点：1、满足热量需求，均衡膳食：恶性肿瘤是消耗性疾病，热量充足可以减少体内蛋白质的消耗，均衡膳食可以补充营养，增强体质；2、多食低脂和富含蛋白质的食物如瘦肉、鱼、禽蛋、奶制品、豆制品。注意在肝癌晚期肝功能明显异常时，要控制蛋白质的摄入，以免过多进食蛋白质诱发肝性脑病；3、多食富含维生素和膳食纤维的食物，主要见于各种水果和新鲜蔬菜，可起到辅助抗肿瘤作用。4、中药方面的食物应咨询正规中医科医生在其指导下服用。合理均衡的饮食对改善患者的预后有益。具体细则建议就诊于正规医院营养科，制定合理的膳食方案。
肝癌可以吃什么肉？	肝癌患者在饮食方面应尽量避免发霉变质、油腻、煎炸、烟熏、腌制、辛辣刺激、过于坚硬易划伤消化道等食物的摄取，其他无明确的禁忌，日常食物均可食用。在饮食方面可注意以下几点：1、满足热量需求，均衡膳食：恶性肿瘤是消耗性疾病，热量充足可以减少体内蛋白质的消耗，均衡膳食可以补充营养，增强体质；2、多食低脂和富含蛋白质的食物如瘦肉、鱼、禽蛋、奶制品、豆制品。注意在肝癌晚期肝功能明显异常时，要控制蛋白质的摄入，以免过多进食蛋白质诱发肝性脑病；3、多食富含维生素和膳食纤维的食物，主要见于各种水果和新鲜蔬菜，可起到辅助抗肿瘤作用。4、中药方面的食物应咨询正规中医科医生在其指导下服用。合理均衡的饮食对改善患者的预后有益。具体细则建议就诊于正规医院营养科，制定合理的膳食方案。
肝癌可以吃什么鱼？	肝癌患者在饮食方面应尽量避免发霉变质、油腻、煎炸、烟熏、腌制、辛辣刺激、过于坚硬易划伤消化道等食物的摄取，其他无明确的禁忌，日常食物均可食用。在饮食方面可注意以下几点：1、满足热量需求，均衡膳食：恶性肿瘤是消耗性疾病，热量充足可以减少体内蛋白质的消耗，均衡膳食可以补充营养，增强体质；2、多食低脂和富含蛋白质的食物如瘦肉、鱼、禽蛋、奶制品、豆制品。注意在肝癌晚期肝功能明显异常时，要控制蛋白质的摄入，以免过多进食蛋白质诱发肝性脑病；3、多食富含维生素和膳食纤维的食物，主要见于各种水果和新鲜蔬菜，可起到辅助抗肿瘤作用。4、中药方面的食物应咨询正规中医科医生在其指导下服用。合理均衡的饮食对改善患者的预后有益。具体细则建议就诊于正规医院营养科，制定合理的膳食方案。
肝癌能吃什么菜？	肝癌患者在饮食方面应尽量避免发霉变质、油腻、煎炸、烟熏、腌制、辛辣刺激、过于坚硬易划伤消化道等食物的摄取，其他无明确的禁忌，日常食物均可食用。在饮食方面可注意以下几点：1、满足热量需求，均衡膳食：恶性肿瘤是消耗性疾病，热量充足可以减少体内蛋白质的消耗，均衡膳食可以补充营养，增强体质；2、多食低脂和富含蛋白质的食物如瘦肉、鱼、禽蛋、奶制品、豆制品。注意在肝癌晚期肝功能明显异常时，要控制蛋白质的摄入，以免过多进食蛋白质诱发肝性脑病；3、多食富含维生素和膳食纤维的食物，主要见于各种水果和新鲜蔬菜，可起到辅助抗肿瘤作用。4、中药方面的食物应咨询正规中医科医生在其指导下服用。合理均衡的饮食对改善患者的预后有益。具体细则建议就诊于正规医院营养科，制定合理的膳食方案。
肝癌适合吃什么营养品?	肝癌患者在饮食方面应尽量避免发霉变质、油腻、煎炸、烟熏、腌制、辛辣刺激、过于坚硬易划伤消化道等食物的摄取，其他无明确的禁忌，日常食物均可食用。在饮食方面可注意以下几点：1、满足热量需求，均衡膳食：恶性肿瘤是消耗性疾病，热量充足可以减少体内蛋白质的消耗，均衡膳食可以补充营养，增强体质；2、多食低脂和富含蛋白质的食物如瘦肉、鱼、禽蛋、奶制品、豆制品。注意在肝癌晚期肝功能明显异常时，要控制蛋白质的摄入，以免过多进食蛋白质诱发肝性脑病；3、多食富含维生素和膳食纤维的食物，主要见于各种水果和新鲜蔬菜，可起到辅助抗肿瘤作用。4、中药方面的食物应咨询正规中医科医生在其指导下服用。合理均衡的饮食对改善患者的预后有益。具体细则建议就诊于正规医院营养科，制定合理的膳食方案。
肝癌适合吃什么肉？	肝癌患者在饮食方面应尽量避免发霉变质、油腻、煎炸、烟熏、腌制、辛辣刺激、过于坚硬易划伤消化道等食物的摄取，其他无明确的禁忌，日常食物均可食用。在饮食方面可注意以下几点：1、满足热量需求，均衡膳食：恶性肿瘤是消耗性疾病，热量充足可以减少体内蛋白质的消耗，均衡膳食可以补充营养，增强体质；2、多食低脂和富含蛋白质的食物如瘦肉、鱼、禽蛋、奶制品、豆制品。注意在肝癌晚期肝功能明显异常时，要控制蛋白质的摄入，以免过多进食蛋白质诱发肝性脑病；3、多食富含维生素和膳食纤维的食物，主要见于各种水果和新鲜蔬菜，可起到辅助抗肿瘤作用。4、中药方面的食物应咨询正规中医科医生在其指导下服用。合理均衡的饮食对改善患者的预后有益。具体细则建议就诊于正规医院营养科，制定合理的膳食方案。
早期的肝癌患者要多吃什么？	肝癌患者在饮食方面应尽量避免发霉变质、油腻、煎炸、烟熏、腌制、辛辣刺激、过于坚硬易划伤消化道等食物的摄取，其他无明确的禁忌，日常食物均可食用。在饮食方面可注意以下几点：1、满足热量需求，均衡膳食：恶性肿瘤是消耗性疾病，热量充足可以减少体内蛋白质的消耗，均衡膳食可以补充营养，增强体质；2、多食低脂和富含蛋白质的食物如瘦肉、鱼、禽蛋、奶制品、豆制品。注意在肝癌晚期肝功能明显异常时，要控制蛋白质的摄入，以免过多进食蛋白质诱发肝性脑病；3、多食富含维生素和膳食纤维的食物，主要见于各种水果和新鲜蔬菜，可起到辅助抗肿瘤作用。4、中药方面的食物应咨询正规中医科医生在其指导下服用。合理均衡的饮食对改善患者的预后有益。具体细则建议就诊于正规医院营养科，制定合理的膳食方案。
肝癌的人能喝牛奶吗？	肝癌患者在饮食方面应尽量避免发霉变质、油腻、煎炸、烟熏、腌制、辛辣刺激、过于坚硬易划伤消化道等食物的摄取，其他无明确的禁忌，日常食物均可食用。在饮食方面可注意以下几点：1、满足热量需求，均衡膳食：恶性肿瘤是消耗性疾病，热量充足可以减少体内蛋白质的消耗，均衡膳食可以补充营养，增强体质；2、多食低脂和富含蛋白质的食物如瘦肉、鱼、禽蛋、奶制品、豆制品。注意在肝癌晚期肝功能明显异常时，要控制蛋白质的摄入，以免过多进食蛋白质诱发肝性脑病；3、多食富含维生素和膳食纤维的食物，主要见于各种水果和新鲜蔬菜，可起到辅助抗肿瘤作用。4、中药方面的食物应咨询正规中医科医生在其指导下服用。合理均衡的饮食对改善患者的预后有益。具体细则建议就诊于正规医院营养科，制定合理的膳食方案。
肝癌喝什么牛奶对身体好	肝癌患者在饮食方面应尽量避免发霉变质、油腻、煎炸、烟熏、腌制、辛辣刺激、过于坚硬易划伤消化道等食物的摄取，其他无明确的禁忌，日常食物均可食用。在饮食方面可注意以下几点：1、满足热量需求，均衡膳食：恶性肿瘤是消耗性疾病，热量充足可以减少体内蛋白质的消耗，均衡膳食可以补充营养，增强体质；2、多食低脂和富含蛋白质的食物如瘦肉、鱼、禽蛋、奶制品、豆制品。注意在肝癌晚期肝功能明显异常时，要控制蛋白质的摄入，以免过多进食蛋白质诱发肝性脑病；3、多食富含维生素和膳食纤维的食物，主要见于各种水果和新鲜蔬菜，可起到辅助抗肿瘤作用。4、中药方面的食物应咨询正规中医科医生在其指导下服用。合理均衡的饮食对改善患者的预后有益。具体细则建议就诊于正规医院营养科，制定合理的膳食方案。
肝癌早期切除后能吃鸭子吗？	肝癌患者在饮食方面应尽量避免发霉变质、油腻、煎炸、烟熏、腌制、辛辣刺激、过于坚硬易划伤消化道等食物的摄取，其他无明确的禁忌，日常食物均可食用。在饮食方面可注意以下几点：1、满足热量需求，均衡膳食：恶性肿瘤是消耗性疾病，热量充足可以减少体内蛋白质的消耗，均衡膳食可以补充营养，增强体质；2、多食低脂和富含蛋白质的食物如瘦肉、鱼、禽蛋、奶制品、豆制品。注意在肝癌晚期肝功能明显异常时，要控制蛋白质的摄入，以免过多进食蛋白质诱发肝性脑病；3、多食富含维生素和膳食纤维的食物，主要见于各种水果和新鲜蔬菜，可起到辅助抗肿瘤作用。4、中药方面的食物应咨询正规中医科医生在其指导下服用。合理均衡的饮食对改善患者的预后有益。具体细则建议就诊于正规医院营养科，制定合理的膳食方案。
原发性肝癌能吃醋吗？	肝癌患者在饮食方面应尽量避免发霉变质、油腻、煎炸、烟熏、腌制、辛辣刺激、过于坚硬易划伤消化道等食物的摄取，其他无明确的禁忌，日常食物均可食用。在饮食方面可注意以下几点：1、满足热量需求，均衡膳食：恶性肿瘤是消耗性疾病，热量充足可以减少体内蛋白质的消耗，均衡膳食可以补充营养，增强体质；2、多食低脂和富含蛋白质的食物如瘦肉、鱼、禽蛋、奶制品、豆制品。注意在肝癌晚期肝功能明显异常时，要控制蛋白质的摄入，以免过多进食蛋白质诱发肝性脑病；3、多食富含维生素和膳食纤维的食物，主要见于各种水果和新鲜蔬菜，可起到辅助抗肿瘤作用。4、中药方面的食物应咨询正规中医科医生在其指导下服用。合理均衡的饮食对改善患者的预后有益。具体细则建议就诊于正规医院营养科，制定合理的膳食方案。
肝癌患者可以喝咖啡吗	肝癌患者在饮食方面应尽量避免发霉变质、油腻、煎炸、烟熏、腌制、辛辣刺激、过于坚硬易划伤消化道等食物的摄取，其他无明确的禁忌，日常食物均可食用。在饮食方面可注意以下几点：1、满足热量需求，均衡膳食：恶性肿瘤是消耗性疾病，热量充足可以减少体内蛋白质的消耗，均衡膳食可以补充营养，增强体质；2、多食低脂和富含蛋白质的食物如瘦肉、鱼、禽蛋、奶制品、豆制品。注意在肝癌晚期肝功能明显异常时，要控制蛋白质的摄入，以免过多进食蛋白质诱发肝性脑病；3、多食富含维生素和膳食纤维的食物，主要见于各种水果和新鲜蔬菜，可起到辅助抗肿瘤作用。4、中药方面的食物应咨询正规中医科医生在其指导下服用。合理均衡的饮食对改善患者的预后有益。具体细则建议就诊于正规医院营养科，制定合理的膳食方案。
肝癌患者能吃糖吗？	肝癌患者在饮食方面应尽量避免发霉变质、油腻、煎炸、烟熏、腌制、辛辣刺激、过于坚硬易划伤消化道等食物的摄取，其他无明确的禁忌，日常食物均可食用。在饮食方面可注意以下几点：1、满足热量需求，均衡膳食：恶性肿瘤是消耗性疾病，热量充足可以减少体内蛋白质的消耗，均衡膳食可以补充营养，增强体质；2、多食低脂和富含蛋白质的食物如瘦肉、鱼、禽蛋、奶制品、豆制品。注意在肝癌晚期肝功能明显异常时，要控制蛋白质的摄入，以免过多进食蛋白质诱发肝性脑病；3、多食富含维生素和膳食纤维的食物，主要见于各种水果和新鲜蔬菜，可起到辅助抗肿瘤作用。4、中药方面的食物应咨询正规中医科医生在其指导下服用。合理均衡的饮食对改善患者的预后有益。具体细则建议就诊于正规医院营养科，制定合理的膳食方案。
肝癌晚期可以吃海鲜吗？	肝癌患者在饮食方面应尽量避免发霉变质、油腻、煎炸、烟熏、腌制、辛辣刺激、过于坚硬易划伤消化道等食物的摄取，其他无明确的禁忌，日常食物均可食用。在饮食方面可注意以下几点：1、满足热量需求，均衡膳食：恶性肿瘤是消耗性疾病，热量充足可以减少体内蛋白质的消耗，均衡膳食可以补充营养，增强体质；2、多食低脂和富含蛋白质的食物如瘦肉、鱼、禽蛋、奶制品、豆制品。注意在肝癌晚期肝功能明显异常时，要控制蛋白质的摄入，以免过多进食蛋白质诱发肝性脑病；3、多食富含维生素和膳食纤维的食物，主要见于各种水果和新鲜蔬菜，可起到辅助抗肿瘤作用。4、中药方面的食物应咨询正规中医科医生在其指导下服用。合理均衡的饮食对改善患者的预后有益。具体细则建议就诊于正规医院营养科，制定合理的膳食方案。
肝癌患者可以吃豆腐吗？	肝癌患者在饮食方面应尽量避免发霉变质、油腻、煎炸、烟熏、腌制、辛辣刺激、过于坚硬易划伤消化道等食物的摄取，其他无明确的禁忌，日常食物均可食用。在饮食方面可注意以下几点：1、满足热量需求，均衡膳食：恶性肿瘤是消耗性疾病，热量充足可以减少体内蛋白质的消耗，均衡膳食可以补充营养，增强体质；2、多食低脂和富含蛋白质的食物如瘦肉、鱼、禽蛋、奶制品、豆制品。注意在肝癌晚期肝功能明显异常时，要控制蛋白质的摄入，以免过多进食蛋白质诱发肝性脑病；3、多食富含维生素和膳食纤维的食物，主要见于各种水果和新鲜蔬菜，可起到辅助抗肿瘤作用。4、中药方面的食物应咨询正规中医科医生在其指导下服用。合理均衡的饮食对改善患者的预后有益。具体细则建议就诊于正规医院营养科，制定合理的膳食方案。
肝癌病人能吃火锅吗？	肝癌患者在饮食方面应尽量避免发霉变质、油腻、煎炸、烟熏、腌制、辛辣刺激、过于坚硬易划伤消化道等食物的摄取，其他无明确的禁忌，日常食物均可食用。在饮食方面可注意以下几点：1、满足热量需求，均衡膳食：恶性肿瘤是消耗性疾病，热量充足可以减少体内蛋白质的消耗，均衡膳食可以补充营养，增强体质；2、多食低脂和富含蛋白质的食物如瘦肉、鱼、禽蛋、奶制品、豆制品。注意在肝癌晚期肝功能明显异常时，要控制蛋白质的摄入，以免过多进食蛋白质诱发肝性脑病；3、多食富含维生素和膳食纤维的食物，主要见于各种水果和新鲜蔬菜，可起到辅助抗肿瘤作用。4、中药方面的食物应咨询正规中医科医生在其指导下服用。合理均衡的饮食对改善患者的预后有益。具体细则建议就诊于正规医院营养科，制定合理的膳食方案。
肝癌患者能吃螃蟹吗？	肝癌患者在饮食方面应尽量避免发霉变质、油腻、煎炸、烟熏、腌制、辛辣刺激、过于坚硬易划伤消化道等食物的摄取，其他无明确的禁忌，日常食物均可食用。在饮食方面可注意以下几点：1、满足热量需求，均衡膳食：恶性肿瘤是消耗性疾病，热量充足可以减少体内蛋白质的消耗，均衡膳食可以补充营养，增强体质；2、多食低脂和富含蛋白质的食物如瘦肉、鱼、禽蛋、奶制品、豆制品。注意在肝癌晚期肝功能明显异常时，要控制蛋白质的摄入，以免过多进食蛋白质诱发肝性脑病；3、多食富含维生素和膳食纤维的食物，主要见于各种水果和新鲜蔬菜，可起到辅助抗肿瘤作用。4、中药方面的食物应咨询正规中医科医生在其指导下服用。合理均衡的饮食对改善患者的预后有益。具体细则建议就诊于正规医院营养科，制定合理的膳食方案。
肝癌晚期可以吃红参吗？	肝癌患者在饮食方面应尽量避免发霉变质、油腻、煎炸、烟熏、腌制、辛辣刺激、过于坚硬易划伤消化道等食物的摄取，其他无明确的禁忌，日常食物均可食用。在饮食方面可注意以下几点：1、满足热量需求，均衡膳食：恶性肿瘤是消耗性疾病，热量充足可以减少体内蛋白质的消耗，均衡膳食可以补充营养，增强体质；2、多食低脂和富含蛋白质的食物如瘦肉、鱼、禽蛋、奶制品、豆制品。注意在肝癌晚期肝功能明显异常时，要控制蛋白质的摄入，以免过多进食蛋白质诱发肝性脑病；3、多食富含维生素和膳食纤维的食物，主要见于各种水果和新鲜蔬菜，可起到辅助抗肿瘤作用。4、中药方面的食物应咨询正规中医科医生在其指导下服用。合理均衡的饮食对改善患者的预后有益。具体细则建议就诊于正规医院营养科，制定合理的膳食方案。
肝癌患者可以吃糖吗？	肝癌患者在饮食方面应尽量避免发霉变质、油腻、煎炸、烟熏、腌制、辛辣刺激、过于坚硬易划伤消化道等食物的摄取，其他无明确的禁忌，日常食物均可食用。在饮食方面可注意以下几点：1、满足热量需求，均衡膳食：恶性肿瘤是消耗性疾病，热量充足可以减少体内蛋白质的消耗，均衡膳食可以补充营养，增强体质；2、多食低脂和富含蛋白质的食物如瘦肉、鱼、禽蛋、奶制品、豆制品。注意在肝癌晚期肝功能明显异常时，要控制蛋白质的摄入，以免过多进食蛋白质诱发肝性脑病；3、多食富含维生素和膳食纤维的食物，主要见于各种水果和新鲜蔬菜，可起到辅助抗肿瘤作用。4、中药方面的食物应咨询正规中医科医生在其指导下服用。合理均衡的饮食对改善患者的预后有益。具体细则建议就诊于正规医院营养科，制定合理的膳食方案。
肝癌腹水可以喝牛奶吗？	肝癌患者在饮食方面应尽量避免发霉变质、油腻、煎炸、烟熏、腌制、辛辣刺激、过于坚硬易划伤消化道等食物的摄取，其他无明确的禁忌，日常食物均可食用。在饮食方面可注意以下几点：1、满足热量需求，均衡膳食：恶性肿瘤是消耗性疾病，热量充足可以减少体内蛋白质的消耗，均衡膳食可以补充营养，增强体质；2、多食低脂和富含蛋白质的食物如瘦肉、鱼、禽蛋、奶制品、豆制品。注意在肝癌晚期肝功能明显异常时，要控制蛋白质的摄入，以免过多进食蛋白质诱发肝性脑病；3、多食富含维生素和膳食纤维的食物，主要见于各种水果和新鲜蔬菜，可起到辅助抗肿瘤作用。4、中药方面的食物应咨询正规中医科医生在其指导下服用。合理均衡的饮食对改善患者的预后有益。具体细则建议就诊于正规医院营养科，制定合理的膳食方案。
肝癌晚期可以喝茶吗？	肝癌患者在饮食方面应尽量避免发霉变质、油腻、煎炸、烟熏、腌制、辛辣刺激、过于坚硬易划伤消化道等食物的摄取，其他无明确的禁忌，日常食物均可食用。在饮食方面可注意以下几点：1、满足热量需求，均衡膳食：恶性肿瘤是消耗性疾病，热量充足可以减少体内蛋白质的消耗，均衡膳食可以补充营养，增强体质；2、多食低脂和富含蛋白质的食物如瘦肉、鱼、禽蛋、奶制品、豆制品。注意在肝癌晚期肝功能明显异常时，要控制蛋白质的摄入，以免过多进食蛋白质诱发肝性脑病；3、多食富含维生素和膳食纤维的食物，主要见于各种水果和新鲜蔬菜，可起到辅助抗肿瘤作用。4、中药方面的食物应咨询正规中医科医生在其指导下服用。合理均衡的饮食对改善患者的预后有益。具体细则建议就诊于正规医院营养科，制定合理的膳食方案。
肝癌鸡蛋能吃吗？	肝癌患者在饮食方面应尽量避免发霉变质、油腻、煎炸、烟熏、腌制、辛辣刺激、过于坚硬易划伤消化道等食物的摄取，其他无明确的禁忌，日常食物均可食用。在饮食方面可注意以下几点：1、满足热量需求，均衡膳食：恶性肿瘤是消耗性疾病，热量充足可以减少体内蛋白质的消耗，均衡膳食可以补充营养，增强体质；2、多食低脂和富含蛋白质的食物如瘦肉、鱼、禽蛋、奶制品、豆制品。注意在肝癌晚期肝功能明显异常时，要控制蛋白质的摄入，以免过多进食蛋白质诱发肝性脑病；3、多食富含维生素和膳食纤维的食物，主要见于各种水果和新鲜蔬菜，可起到辅助抗肿瘤作用。4、中药方面的食物应咨询正规中医科医生在其指导下服用。合理均衡的饮食对改善患者的预后有益。具体细则建议就诊于正规医院营养科，制定合理的膳食方案。
肝癌病人可以吃豆腐吗?	肝癌患者在饮食方面应尽量避免发霉变质、油腻、煎炸、烟熏、腌制、辛辣刺激、过于坚硬易划伤消化道等食物的摄取，其他无明确的禁忌，日常食物均可食用。在饮食方面可注意以下几点：1、满足热量需求，均衡膳食：恶性肿瘤是消耗性疾病，热量充足可以减少体内蛋白质的消耗，均衡膳食可以补充营养，增强体质；2、多食低脂和富含蛋白质的食物如瘦肉、鱼、禽蛋、奶制品、豆制品。注意在肝癌晚期肝功能明显异常时，要控制蛋白质的摄入，以免过多进食蛋白质诱发肝性脑病；3、多食富含维生素和膳食纤维的食物，主要见于各种水果和新鲜蔬菜，可起到辅助抗肿瘤作用。4、中药方面的食物应咨询正规中医科医生在其指导下服用。合理均衡的饮食对改善患者的预后有益。具体细则建议就诊于正规医院营养科，制定合理的膳食方案。
肝癌术后能吃醋吗？	肝癌患者在饮食方面应尽量避免发霉变质、油腻、煎炸、烟熏、腌制、辛辣刺激、过于坚硬易划伤消化道等食物的摄取，其他无明确的禁忌，日常食物均可食用。在饮食方面可注意以下几点：1、满足热量需求，均衡膳食：恶性肿瘤是消耗性疾病，热量充足可以减少体内蛋白质的消耗，均衡膳食可以补充营养，增强体质；2、多食低脂和富含蛋白质的食物如瘦肉、鱼、禽蛋、奶制品、豆制品。注意在肝癌晚期肝功能明显异常时，要控制蛋白质的摄入，以免过多进食蛋白质诱发肝性脑病；3、多食富含维生素和膳食纤维的食物，主要见于各种水果和新鲜蔬菜，可起到辅助抗肿瘤作用。4、中药方面的食物应咨询正规中医科医生在其指导下服用。合理均衡的饮食对改善患者的预后有益。具体细则建议就诊于正规医院营养科，制定合理的膳食方案。
肝癌可以吃鸭蛋吗？	肝癌患者在饮食方面应尽量避免发霉变质、油腻、煎炸、烟熏、腌制、辛辣刺激、过于坚硬易划伤消化道等食物的摄取，其他无明确的禁忌，日常食物均可食用。在饮食方面可注意以下几点：1、满足热量需求，均衡膳食：恶性肿瘤是消耗性疾病，热量充足可以减少体内蛋白质的消耗，均衡膳食可以补充营养，增强体质；2、多食低脂和富含蛋白质的食物如瘦肉、鱼、禽蛋、奶制品、豆制品。注意在肝癌晚期肝功能明显异常时，要控制蛋白质的摄入，以免过多进食蛋白质诱发肝性脑病；3、多食富含维生素和膳食纤维的食物，主要见于各种水果和新鲜蔬菜，可起到辅助抗肿瘤作用。4、中药方面的食物应咨询正规中医科医生在其指导下服用。合理均衡的饮食对改善患者的预后有益。具体细则建议就诊于正规医院营养科，制定合理的膳食方案。
肝癌能喝茶吗？	肝癌患者在饮食方面应尽量避免发霉变质、油腻、煎炸、烟熏、腌制、辛辣刺激、过于坚硬易划伤消化道等食物的摄取，其他无明确的禁忌，日常食物均可食用。在饮食方面可注意以下几点：1、满足热量需求，均衡膳食：恶性肿瘤是消耗性疾病，热量充足可以减少体内蛋白质的消耗，均衡膳食可以补充营养，增强体质；2、多食低脂和富含蛋白质的食物如瘦肉、鱼、禽蛋、奶制品、豆制品。注意在肝癌晚期肝功能明显异常时，要控制蛋白质的摄入，以免过多进食蛋白质诱发肝性脑病；3、多食富含维生素和膳食纤维的食物，主要见于各种水果和新鲜蔬菜，可起到辅助抗肿瘤作用。4、中药方面的食物应咨询正规中医科医生在其指导下服用。合理均衡的饮食对改善患者的预后有益。具体细则建议就诊于正规医院营养科，制定合理的膳食方案。
肝癌能喝牛奶吗？	肝癌患者在饮食方面应尽量避免发霉变质、油腻、煎炸、烟熏、腌制、辛辣刺激、过于坚硬易划伤消化道等食物的摄取，其他无明确的禁忌，日常食物均可食用。在饮食方面可注意以下几点：1、满足热量需求，均衡膳食：恶性肿瘤是消耗性疾病，热量充足可以减少体内蛋白质的消耗，均衡膳食可以补充营养，增强体质；2、多食低脂和富含蛋白质的食物如瘦肉、鱼、禽蛋、奶制品、豆制品。注意在肝癌晚期肝功能明显异常时，要控制蛋白质的摄入，以免过多进食蛋白质诱发肝性脑病；3、多食富含维生素和膳食纤维的食物，主要见于各种水果和新鲜蔬菜，可起到辅助抗肿瘤作用。4、中药方面的食物应咨询正规中医科医生在其指导下服用。合理均衡的饮食对改善患者的预后有益。具体细则建议就诊于正规医院营养科，制定合理的膳食方案。
肝癌可以喝牛奶吗？	肝癌患者在饮食方面应尽量避免发霉变质、油腻、煎炸、烟熏、腌制、辛辣刺激、过于坚硬易划伤消化道等食物的摄取，其他无明确的禁忌，日常食物均可食用。在饮食方面可注意以下几点：1、满足热量需求，均衡膳食：恶性肿瘤是消耗性疾病，热量充足可以减少体内蛋白质的消耗，均衡膳食可以补充营养，增强体质；2、多食低脂和富含蛋白质的食物如瘦肉、鱼、禽蛋、奶制品、豆制品。注意在肝癌晚期肝功能明显异常时，要控制蛋白质的摄入，以免过多进食蛋白质诱发肝性脑病；3、多食富含维生素和膳食纤维的食物，主要见于各种水果和新鲜蔬菜，可起到辅助抗肿瘤作用。4、中药方面的食物应咨询正规中医科医生在其指导下服用。合理均衡的饮食对改善患者的预后有益。具体细则建议就诊于正规医院营养科，制定合理的膳食方案。
得了肝癌还可以吃黄豆的吗？	肝癌患者在饮食方面应尽量避免发霉变质、油腻、煎炸、烟熏、腌制、辛辣刺激、过于坚硬易划伤消化道等食物的摄取，其他无明确的禁忌，日常食物均可食用。在饮食方面可注意以下几点：1、满足热量需求，均衡膳食：恶性肿瘤是消耗性疾病，热量充足可以减少体内蛋白质的消耗，均衡膳食可以补充营养，增强体质；2、多食低脂和富含蛋白质的食物如瘦肉、鱼、禽蛋、奶制品、豆制品。注意在肝癌晚期肝功能明显异常时，要控制蛋白质的摄入，以免过多进食蛋白质诱发肝性脑病；3、多食富含维生素和膳食纤维的食物，主要见于各种水果和新鲜蔬菜，可起到辅助抗肿瘤作用。4、中药方面的食物应咨询正规中医科医生在其指导下服用。合理均衡的饮食对改善患者的预后有益。具体细则建议就诊于正规医院营养科，制定合理的膳食方案。
得了肝癌还能吃生花生吗？	肝癌患者在饮食方面应尽量避免发霉变质、油腻、煎炸、烟熏、腌制、辛辣刺激、过于坚硬易划伤消化道等食物的摄取，其他无明确的禁忌，日常食物均可食用。在饮食方面可注意以下几点：1、满足热量需求，均衡膳食：恶性肿瘤是消耗性疾病，热量充足可以减少体内蛋白质的消耗，均衡膳食可以补充营养，增强体质；2、多食低脂和富含蛋白质的食物如瘦肉、鱼、禽蛋、奶制品、豆制品。注意在肝癌晚期肝功能明显异常时，要控制蛋白质的摄入，以免过多进食蛋白质诱发肝性脑病；3、多食富含维生素和膳食纤维的食物，主要见于各种水果和新鲜蔬菜，可起到辅助抗肿瘤作用。4、中药方面的食物应咨询正规中医科医生在其指导下服用。合理均衡的饮食对改善患者的预后有益。具体细则建议就诊于正规医院营养科，制定合理的膳食方案。
得了肝癌的人能吃什么?	肝癌患者在饮食方面应尽量避免发霉变质、油腻、煎炸、烟熏、腌制、辛辣刺激、过于坚硬易划伤消化道等食物的摄取，其他无明确的禁忌，日常食物均可食用。在饮食方面可注意以下几点：1、满足热量需求，均衡膳食：恶性肿瘤是消耗性疾病，热量充足可以减少体内蛋白质的消耗，均衡膳食可以补充营养，增强体质；2、多食低脂和富含蛋白质的食物如瘦肉、鱼、禽蛋、奶制品、豆制品。注意在肝癌晚期肝功能明显异常时，要控制蛋白质的摄入，以免过多进食蛋白质诱发肝性脑病；3、多食富含维生素和膳食纤维的食物，主要见于各种水果和新鲜蔬菜，可起到辅助抗肿瘤作用。4、中药方面的食物应咨询正规中医科医生在其指导下服用。合理均衡的饮食对改善患者的预后有益。具体细则建议就诊于正规医院营养科，制定合理的膳食方案。
禽蛋食品对肝病有害吗?一位老中医说肝病(肝癌)不能吃禽蛋食品	肝癌患者在饮食方面应尽量避免发霉变质、油腻、煎炸、烟熏、腌制、辛辣刺激、过于坚硬易划伤消化道等食物的摄取，其他无明确的禁忌，日常食物均可食用。在饮食方面可注意以下几点：1、满足热量需求，均衡膳食：恶性肿瘤是消耗性疾病，热量充足可以减少体内蛋白质的消耗，均衡膳食可以补充营养，增强体质；2、多食低脂和富含蛋白质的食物如瘦肉、鱼、禽蛋、奶制品、豆制品。注意在肝癌晚期肝功能明显异常时，要控制蛋白质的摄入，以免过多进食蛋白质诱发肝性脑病；3、多食富含维生素和膳食纤维的食物，主要见于各种水果和新鲜蔬菜，可起到辅助抗肿瘤作用。4、中药方面的食物应咨询正规中医科医生在其指导下服用。合理均衡的饮食对改善患者的预后有益。具体细则建议就诊于正规医院营养科，制定合理的膳食方案。
肝癌的饮食注意有哪些？	肝癌患者在饮食方面应尽量避免发霉变质、油腻、煎炸、烟熏、腌制、辛辣刺激、过于坚硬易划伤消化道等食物的摄取，其他无明确的禁忌，日常食物均可食用。在饮食方面可注意以下几点：1、满足热量需求，均衡膳食：恶性肿瘤是消耗性疾病，热量充足可以减少体内蛋白质的消耗，均衡膳食可以补充营养，增强体质；2、多食低脂和富含蛋白质的食物如瘦肉、鱼、禽蛋、奶制品、豆制品。注意在肝癌晚期肝功能明显异常时，要控制蛋白质的摄入，以免过多进食蛋白质诱发肝性脑病；3、多食富含维生素和膳食纤维的食物，主要见于各种水果和新鲜蔬菜，可起到辅助抗肿瘤作用。4、中药方面的食物应咨询正规中医科医生在其指导下服用。合理均衡的饮食对改善患者的预后有益。具体细则建议就诊于正规医院营养科，制定合理的膳食方案。
肝癌吃蝎子成吗	肝癌患者在饮食方面应尽量避免发霉变质、油腻、煎炸、烟熏、腌制、辛辣刺激、过于坚硬易划伤消化道等食物的摄取，其他无明确的禁忌，日常食物均可食用。在饮食方面可注意以下几点：1、满足热量需求，均衡膳食：恶性肿瘤是消耗性疾病，热量充足可以减少体内蛋白质的消耗，均衡膳食可以补充营养，增强体质；2、多食低脂和富含蛋白质的食物如瘦肉、鱼、禽蛋、奶制品、豆制品。注意在肝癌晚期肝功能明显异常时，要控制蛋白质的摄入，以免过多进食蛋白质诱发肝性脑病；3、多食富含维生素和膳食纤维的食物，主要见于各种水果和新鲜蔬菜，可起到辅助抗肿瘤作用。4、中药方面的食物应咨询正规中医科医生在其指导下服用。合理均衡的饮食对改善患者的预后有益。具体细则建议就诊于正规医院营养科，制定合理的膳食方案。
肝癌吃木瓜好不好？	肝癌患者在饮食方面应尽量避免发霉变质、油腻、煎炸、烟熏、腌制、辛辣刺激、过于坚硬易划伤消化道等食物的摄取，其他无明确的禁忌，日常食物均可食用。在饮食方面可注意以下几点：1、满足热量需求，均衡膳食：恶性肿瘤是消耗性疾病，热量充足可以减少体内蛋白质的消耗，均衡膳食可以补充营养，增强体质；2、多食低脂和富含蛋白质的食物如瘦肉、鱼、禽蛋、奶制品、豆制品。注意在肝癌晚期肝功能明显异常时，要控制蛋白质的摄入，以免过多进食蛋白质诱发肝性脑病；3、多食富含维生素和膳食纤维的食物，主要见于各种水果和新鲜蔬菜，可起到辅助抗肿瘤作用。4、中药方面的食物应咨询正规中医科医生在其指导下服用。合理均衡的饮食对改善患者的预后有益。具体细则建议就诊于正规医院营养科，制定合理的膳食方案。
肝癌吃驴肉好吗	肝癌患者在饮食方面应尽量避免发霉变质、油腻、煎炸、烟熏、腌制、辛辣刺激、过于坚硬易划伤消化道等食物的摄取，其他无明确的禁忌，日常食物均可食用。在饮食方面可注意以下几点：1、满足热量需求，均衡膳食：恶性肿瘤是消耗性疾病，热量充足可以减少体内蛋白质的消耗，均衡膳食可以补充营养，增强体质；2、多食低脂和富含蛋白质的食物如瘦肉、鱼、禽蛋、奶制品、豆制品。注意在肝癌晚期肝功能明显异常时，要控制蛋白质的摄入，以免过多进食蛋白质诱发肝性脑病；3、多食富含维生素和膳食纤维的食物，主要见于各种水果和新鲜蔬菜，可起到辅助抗肿瘤作用。4、中药方面的食物应咨询正规中医科医生在其指导下服用。合理均衡的饮食对改善患者的预后有益。具体细则建议就诊于正规医院营养科，制定合理的膳食方案。
肝癌手术后能吃海鲜吗?	肝癌患者在饮食方面应尽量避免发霉变质、油腻、煎炸、烟熏、腌制、辛辣刺激、过于坚硬易划伤消化道等食物的摄取，其他无明确的禁忌，日常食物均可食用。在饮食方面可注意以下几点：1、满足热量需求，均衡膳食：恶性肿瘤是消耗性疾病，热量充足可以减少体内蛋白质的消耗，均衡膳食可以补充营养，增强体质；2、多食低脂和富含蛋白质的食物如瘦肉、鱼、禽蛋、奶制品、豆制品。注意在肝癌晚期肝功能明显异常时，要控制蛋白质的摄入，以免过多进食蛋白质诱发肝性脑病；3、多食富含维生素和膳食纤维的食物，主要见于各种水果和新鲜蔬菜，可起到辅助抗肿瘤作用。4、中药方面的食物应咨询正规中医科医生在其指导下服用。合理均衡的饮食对改善患者的预后有益。具体细则建议就诊于正规医院营养科，制定合理的膳食方案。
听说肝癌病人可以多吃大蒜，怎么吃最好？	肝癌患者在饮食方面应尽量避免发霉变质、油腻、煎炸、烟熏、腌制、辛辣刺激、过于坚硬易划伤消化道等食物的摄取，其他无明确的禁忌，日常食物均可食用。在饮食方面可注意以下几点：1、满足热量需求，均衡膳食：恶性肿瘤是消耗性疾病，热量充足可以减少体内蛋白质的消耗，均衡膳食可以补充营养，增强体质；2、多食低脂和富含蛋白质的食物如瘦肉、鱼、禽蛋、奶制品、豆制品。注意在肝癌晚期肝功能明显异常时，要控制蛋白质的摄入，以免过多进食蛋白质诱发肝性脑病；3、多食富含维生素和膳食纤维的食物，主要见于各种水果和新鲜蔬菜，可起到辅助抗肿瘤作用。4、中药方面的食物应咨询正规中医科医生在其指导下服用。合理均衡的饮食对改善患者的预后有益。具体细则建议就诊于正规医院营养科，制定合理的膳食方案。
给肝癌患者炖鸽子汤里应该放些什么	肝癌患者在饮食方面应尽量避免发霉变质、油腻、煎炸、烟熏、腌制、辛辣刺激、过于坚硬易划伤消化道等食物的摄取，其他无明确的禁忌，日常食物均可食用。在饮食方面可注意以下几点：1、满足热量需求，均衡膳食：恶性肿瘤是消耗性疾病，热量充足可以减少体内蛋白质的消耗，均衡膳食可以补充营养，增强体质；2、多食低脂和富含蛋白质的食物如瘦肉、鱼、禽蛋、奶制品、豆制品。注意在肝癌晚期肝功能明显异常时，要控制蛋白质的摄入，以免过多进食蛋白质诱发肝性脑病；3、多食富含维生素和膳食纤维的食物，主要见于各种水果和新鲜蔬菜，可起到辅助抗肿瘤作用。4、中药方面的食物应咨询正规中医科医生在其指导下服用。合理均衡的饮食对改善患者的预后有益。具体细则建议就诊于正规医院营养科，制定合理的膳食方案。
早期的肝癌患者要多吃什么？	肝癌患者在饮食方面应尽量避免发霉变质、油腻、煎炸、烟熏、腌制、辛辣刺激、过于坚硬易划伤消化道等食物的摄取，其他无明确的禁忌，日常食物均可食用。在饮食方面可注意以下几点：1、满足热量需求，均衡膳食：恶性肿瘤是消耗性疾病，热量充足可以减少体内蛋白质的消耗，均衡膳食可以补充营养，增强体质；2、多食低脂和富含蛋白质的食物如瘦肉、鱼、禽蛋、奶制品、豆制品。注意在肝癌晚期肝功能明显异常时，要控制蛋白质的摄入，以免过多进食蛋白质诱发肝性脑病；3、多食富含维生素和膳食纤维的食物，主要见于各种水果和新鲜蔬菜，可起到辅助抗肿瘤作用。4、中药方面的食物应咨询正规中医科医生在其指导下服用。合理均衡的饮食对改善患者的预后有益。具体细则建议就诊于正规医院营养科，制定合理的膳食方案。
肝癌吃什么水果最好	肝癌患者在饮食方面应尽量避免发霉变质、油腻、煎炸、烟熏、腌制、辛辣刺激、过于坚硬易划伤消化道等食物的摄取，其他无明确的禁忌，日常食物均可食用。在饮食方面可注意以下几点：1、满足热量需求，均衡膳食：恶性肿瘤是消耗性疾病，热量充足可以减少体内蛋白质的消耗，均衡膳食可以补充营养，增强体质；2、多食低脂和富含蛋白质的食物如瘦肉、鱼、禽蛋、奶制品、豆制品。注意在肝癌晚期肝功能明显异常时，要控制蛋白质的摄入，以免过多进食蛋白质诱发肝性脑病；3、多食富含维生素和膳食纤维的食物，主要见于各种水果和新鲜蔬菜，可起到辅助抗肿瘤作用。4、中药方面的食物应咨询正规中医科医生在其指导下服用。合理均衡的饮食对改善患者的预后有益。具体细则建议就诊于正规医院营养科，制定合理的膳食方案。
肝癌喝什么汤最好?	肝癌患者在饮食方面应尽量避免发霉变质、油腻、煎炸、烟熏、腌制、辛辣刺激、过于坚硬易划伤消化道等食物的摄取，其他无明确的禁忌，日常食物均可食用。在饮食方面可注意以下几点：1、满足热量需求，均衡膳食：恶性肿瘤是消耗性疾病，热量充足可以减少体内蛋白质的消耗，均衡膳食可以补充营养，增强体质；2、多食低脂和富含蛋白质的食物如瘦肉、鱼、禽蛋、奶制品、豆制品。注意在肝癌晚期肝功能明显异常时，要控制蛋白质的摄入，以免过多进食蛋白质诱发肝性脑病；3、多食富含维生素和膳食纤维的食物，主要见于各种水果和新鲜蔬菜，可起到辅助抗肿瘤作用。4、中药方面的食物应咨询正规中医科医生在其指导下服用。合理均衡的饮食对改善患者的预后有益。具体细则建议就诊于正规医院营养科，制定合理的膳食方案。
肝癌饮什么汤适合？	肝癌患者在饮食方面应尽量避免发霉变质、油腻、煎炸、烟熏、腌制、辛辣刺激、过于坚硬易划伤消化道等食物的摄取，其他无明确的禁忌，日常食物均可食用。在饮食方面可注意以下几点：1、满足热量需求，均衡膳食：恶性肿瘤是消耗性疾病，热量充足可以减少体内蛋白质的消耗，均衡膳食可以补充营养，增强体质；2、多食低脂和富含蛋白质的食物如瘦肉、鱼、禽蛋、奶制品、豆制品。注意在肝癌晚期肝功能明显异常时，要控制蛋白质的摄入，以免过多进食蛋白质诱发肝性脑病；3、多食富含维生素和膳食纤维的食物，主要见于各种水果和新鲜蔬菜，可起到辅助抗肿瘤作用。4、中药方面的食物应咨询正规中医科医生在其指导下服用。合理均衡的饮食对改善患者的预后有益。具体细则建议就诊于正规医院营养科，制定合理的膳食方案。
肝癌吃什么食物最好	肝癌患者在饮食方面应尽量避免发霉变质、油腻、煎炸、烟熏、腌制、辛辣刺激、过于坚硬易划伤消化道等食物的摄取，其他无明确的禁忌，日常食物均可食用。在饮食方面可注意以下几点：1、满足热量需求，均衡膳食：恶性肿瘤是消耗性疾病，热量充足可以减少体内蛋白质的消耗，均衡膳食可以补充营养，增强体质；2、多食低脂和富含蛋白质的食物如瘦肉、鱼、禽蛋、奶制品、豆制品。注意在肝癌晚期肝功能明显异常时，要控制蛋白质的摄入，以免过多进食蛋白质诱发肝性脑病；3、多食富含维生素和膳食纤维的食物，主要见于各种水果和新鲜蔬菜，可起到辅助抗肿瘤作用。4、中药方面的食物应咨询正规中医科医生在其指导下服用。合理均衡的饮食对改善患者的预后有益。具体细则建议就诊于正规医院营养科，制定合理的膳食方案。
肝癌的病人能吃酸菜吗？	肝癌患者在饮食方面应尽量避免发霉变质、油腻、煎炸、烟熏、腌制、辛辣刺激、过于坚硬易划伤消化道等食物的摄取，其他无明确的禁忌，日常食物均可食用。在饮食方面可注意以下几点：1、满足热量需求，均衡膳食：恶性肿瘤是消耗性疾病，热量充足可以减少体内蛋白质的消耗，均衡膳食可以补充营养，增强体质；2、多食低脂和富含蛋白质的食物如瘦肉、鱼、禽蛋、奶制品、豆制品。注意在肝癌晚期肝功能明显异常时，要控制蛋白质的摄入，以免过多进食蛋白质诱发肝性脑病；3、多食富含维生素和膳食纤维的食物，主要见于各种水果和新鲜蔬菜，可起到辅助抗肿瘤作用。4、中药方面的食物应咨询正规中医科医生在其指导下服用。合理均衡的饮食对改善患者的预后有益。具体细则建议就诊于正规医院营养科，制定合理的膳食方案。
肝癌的病人可以吃红薯吗？	肝癌患者在饮食方面应尽量避免发霉变质、油腻、煎炸、烟熏、腌制、辛辣刺激、过于坚硬易划伤消化道等食物的摄取，其他无明确的禁忌，日常食物均可食用。在饮食方面可注意以下几点：1、满足热量需求，均衡膳食：恶性肿瘤是消耗性疾病，热量充足可以减少体内蛋白质的消耗，均衡膳食可以补充营养，增强体质；2、多食低脂和富含蛋白质的食物如瘦肉、鱼、禽蛋、奶制品、豆制品。注意在肝癌晚期肝功能明显异常时，要控制蛋白质的摄入，以免过多进食蛋白质诱发肝性脑病；3、多食富含维生素和膳食纤维的食物，主要见于各种水果和新鲜蔬菜，可起到辅助抗肿瘤作用。4、中药方面的食物应咨询正规中医科医生在其指导下服用。合理均衡的饮食对改善患者的预后有益。具体细则建议就诊于正规医院营养科，制定合理的膳食方案。
肝癌手术后能喝鲫鱼汤和大骨头汤吗	肝癌患者若行切除性手术，对胃肠功能存在干扰，术后饮食上应注意过渡饮食，低脂清淡，少食多餐，早期避免奶制品的摄入以减少腹胀的概率，待胃肠功能基本恢复后注意合理搭配，营养均衡即可，无其他禁忌。若为介入性手术，对胃肠功能干扰小，术后饮食注意合理搭配，营养均衡即可，无其他禁忌。具体细则建议就诊于正规医院营养科，制定合理的膳食方案。
肝癌术后能吃虾米或海带、紫菜、干贝吗	肝癌患者若行切除性手术，对胃肠功能存在干扰，术后饮食上应注意过渡饮食，低脂清淡，少食多餐，早期避免奶制品的摄入以减少腹胀的概率，待胃肠功能基本恢复后注意合理搭配，营养均衡即可，无其他禁忌。若为介入性手术，对胃肠功能干扰小，术后饮食注意合理搭配，营养均衡即可，无其他禁忌。具体细则建议就诊于正规医院营养科，制定合理的膳食方案。
肝癌患者术后可以吃羊肉吗？	肝癌患者若行切除性手术，对胃肠功能存在干扰，术后饮食上应注意过渡饮食，低脂清淡，少食多餐，早期避免奶制品的摄入以减少腹胀的概率，待胃肠功能基本恢复后注意合理搭配，营养均衡即可，无其他禁忌。若为介入性手术，对胃肠功能干扰小，术后饮食注意合理搭配，营养均衡即可，无其他禁忌。具体细则建议就诊于正规医院营养科，制定合理的膳食方案。
肝癌手术后可以吃生姜吗？	肝癌患者若行切除性手术，对胃肠功能存在干扰，术后饮食上应注意过渡饮食，低脂清淡，少食多餐，早期避免奶制品的摄入以减少腹胀的概率，待胃肠功能基本恢复后注意合理搭配，营养均衡即可，无其他禁忌。若为介入性手术，对胃肠功能干扰小，术后饮食注意合理搭配，营养均衡即可，无其他禁忌。具体细则建议就诊于正规医院营养科，制定合理的膳食方案。
肝癌,星期一做的介入，肝癌介入后能吃什么	肝癌患者若行切除性手术，对胃肠功能存在干扰，术后饮食上应注意过渡饮食，低脂清淡，少食多餐，早期避免奶制品的摄入以减少腹胀的概率，待胃肠功能基本恢复后注意合理搭配，营养均衡即可，无其他禁忌。若为介入性手术，对胃肠功能干扰小，术后饮食注意合理搭配，营养均衡即可，无其他禁忌。具体细则建议就诊于正规医院营养科，制定合理的膳食方案。
肝癌一至二期病人，手术后可以喝鸽子汤、黑鱼汤嘛？	肝癌患者若行切除性手术，对胃肠功能存在干扰，术后饮食上应注意过渡饮食，低脂清淡，少食多餐，早期避免奶制品的摄入以减少腹胀的概率，待胃肠功能基本恢复后注意合理搭配，营养均衡即可，无其他禁忌。若为介入性手术，对胃肠功能干扰小，术后饮食注意合理搭配，营养均衡即可，无其他禁忌。具体细则建议就诊于正规医院营养科，制定合理的膳食方案。
肝癌手术后过了1个星期吃什么好呢	肝癌患者若行切除性手术，对胃肠功能存在干扰，术后饮食上应注意过渡饮食，低脂清淡，少食多餐，早期避免奶制品的摄入以减少腹胀的概率，待胃肠功能基本恢复后注意合理搭配，营养均衡即可，无其他禁忌。若为介入性手术，对胃肠功能干扰小，术后饮食注意合理搭配，营养均衡即可，无其他禁忌。具体细则建议就诊于正规医院营养科，制定合理的膳食方案。
肝癌化疗术后可以吃什么	化疗后患者饮食上无明显禁忌，但化疗后部分患者可能会出现食欲下降，恶心呕吐症状，故在合理搭配，营养均衡的前提下可适当调整食物的口味，低脂清淡，少食多餐，尽量满足患者日常的能量与营养需求。具体细则建议就诊于正规医院营养科，制定合理的膳食方案。
吃什么可以预防肝癌呢？	目前并无可以明确预防肝癌发生的食物，但一些富含维生素、膳食纤维和微量元素的食物对于增强人体免疫力有一定的帮助，如胡萝卜、苦瓜、西蓝花、西红柿、大蒜等蔬菜，柠檬、猕猴桃、苹果等水果和其他食品。良好的作息规律，适当的运动锻炼，均衡营养的膳食摄取对于预防疾病的发生有着重要的帮助。
最好的抗肝癌的食物是什么	目前并无可以明确预防肝癌发生的食物，但一些富含维生素、膳食纤维和微量元素的食物对于增强人体免疫力有一定的帮助，如胡萝卜、苦瓜、西蓝花、西红柿、大蒜等蔬菜，柠檬、猕猴桃、苹果等水果和其他食品。良好的作息规律，适当的运动锻炼，均衡营养的膳食摄取对于预防疾病的发生有着重要的帮助。
吃哪些食物可以预防肝癌？	目前并无可以明确预防肝癌发生的食物，但一些富含维生素、膳食纤维和微量元素的食物对于增强人体免疫力有一定的帮助，如胡萝卜、苦瓜、西蓝花、西红柿、大蒜等蔬菜，柠檬、猕猴桃、苹果等水果和其他食品。良好的作息规律，适当的运动锻炼，均衡营养的膳食摄取对于预防疾病的发生有着重要的帮助。
肝癌吃什么食物抗癌?	目前并无可以明确预防肝癌发生的食物，但一些富含维生素、膳食纤维和微量元素的食物对于增强人体免疫力有一定的帮助，如胡萝卜、苦瓜、西蓝花、西红柿、大蒜等蔬菜，柠檬、猕猴桃、苹果等水果和其他食品。良好的作息规律，适当的运动锻炼，均衡营养的膳食摄取对于预防疾病的发生有着重要的帮助。
我想问一下肝癌吃牡蛎真的能抗癌吗？	目前并无可以明确预防肝癌发生的食物，但一些富含维生素、膳食纤维和微量元素的食物对于增强人体免疫力有一定的帮助，如胡萝卜、苦瓜、西蓝花、西红柿、大蒜等蔬菜，柠檬、猕猴桃、苹果等水果和其他食品。良好的作息规律，适当的运动锻炼，均衡营养的膳食摄取对于预防疾病的发生有着重要的帮助。
肝血管瘤会慢慢长大吗	肝海绵状血管瘤是最常见的肝良性肿瘤，本病发展缓慢，病程可达数年至数十年之久。一些因素如女性青春期、服用类固醇激素、避孕药以及妊娠等可使某些患者血管瘤生长速度加快，建议到正规医院进行规范化诊治。
肝血管瘤一般为先天的，可为什么成年人多见。	肝海绵状血管瘤是最常见的肝良性肿瘤，本病发展缓慢，病程可达数年至数十年之久。一些因素如女性青春期、服用类固醇激素、避孕药以及妊娠等可使某些患者血管瘤生长速度加快，建议到正规医院进行规范化诊治。
肝血管瘤的发病率高吗？	肝海绵状血管瘤是最常见的肝良性肿瘤，发病率为1%-7%，约占肝良性肿瘤的74%。本病多见于女性，可发生于任何年龄，但以 30-50 岁多见。若诊断此病建议到正规医院诊治。
肝血管瘤的人多吗	肝海绵状血管瘤是最常见的肝良性肿瘤，发病率为1%-7%，约占肝良性肿瘤的74%。本病多见于女性，可发生于任何年龄，但以 30-50 岁多见。若诊断此病建议到正规医院诊治。
的肝血管瘤的人多吗？	肝海绵状血管瘤是最常见的肝良性肿瘤，发病率为1%-7%，约占肝良性肿瘤的74%。本病多见于女性，可发生于任何年龄，但以 30-50 岁多见。若诊断此病建议到正规医院诊治。
多少人会得肝血管瘤？	肝海绵状血管瘤是最常见的肝良性肿瘤，发病率为1%-7%，约占肝良性肿瘤的74%。本病多见于女性，可发生于任何年龄，但以 30-50 岁多见。若诊断此病建议到正规医院诊治。
男性患肝血管瘤的可能性大吗	肝海绵状血管瘤是最常见的肝良性肿瘤，本病多见于女性，与内分泌因素有关，可发生于任何年龄，但以 30-50 岁多见。男性仍然有患病的可能，若诊断此病建议到正规医院诊治。
得肝血管瘤是怎么回事啊？	肝海绵状血管瘤是最常见的肝良性肿瘤，多认为起源于肝内的胚胎性血管错构芽，由于某种因素作用，如服用类固醇激素、避孕药以及妇女怀孕等，引起肿瘤样增生而形成。若诊断此病建议到正规医院诊治。
肝内血管瘤是什么	肝海绵状血管瘤是最常见的肝良性肿瘤，多认为起源于肝内的胚胎性血管错构芽，由于某种因素作用，如服用类固醇激素、避孕药以及妇女怀孕等，引起肿瘤样增生而形成。若诊断此病建议到正规医院诊治。
什么是肝血管瘤？	肝海绵状血管瘤是最常见的肝良性肿瘤，多认为起源于肝内的胚胎性血管错构芽，由于某种因素作用，如服用类固醇激素、避孕药以及妇女怀孕等，引起肿瘤样增生而形成。若诊断此病建议到正规医院诊治。
什么是肝内血管瘤	肝海绵状血管瘤是最常见的肝良性肿瘤，多认为起源于肝内的胚胎性血管错构芽，由于某种因素作用，如服用类固醇激素、避孕药以及妇女怀孕等，引起肿瘤样增生而形成。若诊断此病建议到正规医院诊治。
肝脏血管瘤是转移瘤吗？	肝海绵状血管瘤是最常见的肝良性肿瘤，多认为起源于肝内的胚胎性血管错构芽，由于某种因素作用，如服用类固醇激素、避孕药以及妇女怀孕等，引起肿瘤样增生而形成。该病为原发性肝脏肿瘤，不是转移瘤，若诊断此病建议到正规医院诊治。
多发性肝血管瘤属于癌症吗	肝海绵状血管瘤是最常见的肝良性肿瘤，多认为起源于肝内的胚胎性血管错构芽，由于某种因素作用，如服用类固醇激素、避孕药以及妇女怀孕等，引起肿瘤样增生而形成。该病为良性肝脏肿瘤，不是癌症，一般不会癌变，若诊断此病建议到正规医院诊治。
肝血管瘤会癌变吗？	肝海绵状血管瘤是最常见的肝良性肿瘤，多认为起源于肝内的胚胎性血管错构芽，由于某种因素作用，如服用类固醇激素、避孕药以及妇女怀孕等，引起肿瘤样增生而形成。该病为良性肝脏肿瘤，不是癌症，一般不会癌变，若诊断此病建议到正规医院诊治。
肝血管瘤会恶化吗？？	肝海绵状血管瘤是最常见的肝良性肿瘤，多认为起源于肝内的胚胎性血管错构芽，由于某种因素作用，如服用类固醇激素、避孕药以及妇女怀孕等，引起肿瘤样增生而形成。该病为良性肝脏肿瘤，不是癌症，一般不会癌变，若诊断此病建议到正规医院诊治。
肝血管瘤和乙肝小三阳有关系吗？	肝海绵状血管瘤是最常见的肝良性肿瘤，多认为起源于先天性肝内末梢血管发育异常，由于某种因素作用，如服用类固醇激素、避孕药以及妇女怀孕等，引起肿瘤样增生而形成。目前缺乏证据显示乙肝、吸烟、饮酒、中药、情绪激动等因素与血管瘤的发生有关，但上述因素会不同程度影响肝脏功能，若诊断此病建议到正规医院诊治。
乙肝患者是不是更容易得肝血管瘤？	肝海绵状血管瘤是最常见的肝良性肿瘤，多认为起源于先天性肝内末梢血管发育异常，由于某种因素作用，如服用类固醇激素、避孕药以及妇女怀孕等，引起肿瘤样增生而形成。目前缺乏证据显示乙肝、吸烟、饮酒、中药、情绪激动等因素与血管瘤的发生有关，但上述因素会不同程度影响肝脏功能，若诊断此病建议到正规医院诊治。
乙肝患者是不是更容易得肝血管瘤？	肝海绵状血管瘤是最常见的肝良性肿瘤，多认为起源于先天性肝内末梢血管发育异常，由于某种因素作用，如服用类固醇激素、避孕药以及妇女怀孕等，引起肿瘤样增生而形成。目前缺乏证据显示乙肝、吸烟、饮酒、中药、情绪激动等因素与血管瘤的发生有关，但上述因素会不同程度影响肝脏功能，若诊断此病建议到正规医院诊治。
肝血管瘤和乙肝有关系吗？	肝海绵状血管瘤是最常见的肝良性肿瘤，多认为起源于先天性肝内末梢血管发育异常，由于某种因素作用，如服用类固醇激素、避孕药以及妇女怀孕等，引起肿瘤样增生而形成。目前缺乏证据显示乙肝、吸烟、饮酒、中药、情绪激动等因素与血管瘤的发生有关，但上述因素会不同程度影响肝脏功能，若诊断此病建议到正规医院诊治。
吸烟会得肝血管瘤吗？	肝海绵状血管瘤是最常见的肝良性肿瘤，多认为起源于先天性肝内末梢血管发育异常，由于某种因素作用，如服用类固醇激素、避孕药以及妇女怀孕等，引起肿瘤样增生而形成。目前缺乏证据显示乙肝、吸烟、饮酒、中药、情绪激动等因素与血管瘤的发生有关，但上述因素会不同程度影响肝脏功能，若诊断此病建议到正规医院诊治。
吸烟会得肝血管瘤吗？	肝海绵状血管瘤是最常见的肝良性肿瘤，多认为起源于先天性肝内末梢血管发育异常，由于某种因素作用，如服用类固醇激素、避孕药以及妇女怀孕等，引起肿瘤样增生而形成。目前缺乏证据显示乙肝、吸烟、饮酒、中药、情绪激动等因素与血管瘤的发生有关，但上述因素会不同程度影响肝脏功能，若诊断此病建议到正规医院诊治。
肝血管瘤，是生气得的吗？	肝海绵状血管瘤是最常见的肝良性肿瘤，多认为起源于先天性肝内末梢血管发育异常，由于某种因素作用，如服用类固醇激素、避孕药以及妇女怀孕等，引起肿瘤样增生而形成。目前缺乏证据显示乙肝、吸烟、饮酒、中药、情绪激动等因素与血管瘤的发生有关，但上述因素会不同程度影响肝脏功能，若诊断此病建议到正规医院诊治。
生气容易得肝血管瘤吗	肝海绵状血管瘤是最常见的肝良性肿瘤，多认为起源于先天性肝内末梢血管发育异常，由于某种因素作用，如服用类固醇激素、避孕药以及妇女怀孕等，引起肿瘤样增生而形成。目前缺乏证据显示乙肝、吸烟、饮酒、中药、情绪激动等因素与血管瘤的发生有关，但上述因素会不同程度影响肝脏功能，若诊断此病建议到正规医院诊治。
肝血管瘤会是因为吃中药吗？	肝海绵状血管瘤是最常见的肝良性肿瘤，多认为起源于先天性肝内末梢血管发育异常，由于某种因素作用，如服用类固醇激素、避孕药以及妇女怀孕等，引起肿瘤样增生而形成。目前缺乏证据显示乙肝、吸烟、饮酒、中药、情绪激动等因素与血管瘤的发生有关，但上述因素会不同程度影响肝脏功能，若诊断此病建议到正规医院诊治。
肝血管瘤跟饮酒有关系吗？	肝海绵状血管瘤是最常见的肝良性肿瘤，多认为起源于先天性肝内末梢血管发育异常，由于某种因素作用，如服用类固醇激素、避孕药以及妇女怀孕等，引起肿瘤样增生而形成。目前缺乏证据显示乙肝、吸烟、饮酒、中药、情绪激动等因素与血管瘤的发生有关，但上述因素会不同程度影响肝脏功能，若诊断此病建议到正规医院诊治。
喝酒会使肝血管瘤变大吗	肝海绵状血管瘤是最常见的肝良性肿瘤，多认为起源于先天性肝内末梢血管发育异常，由于某种因素作用，如服用类固醇激素、避孕药以及妇女怀孕等，引起肿瘤样增生而形成。目前缺乏证据显示乙肝、吸烟、饮酒、中药、情绪激动等因素与血管瘤的发生有关，但上述因素会不同程度影响肝脏功能，若诊断此病建议到正规医院诊治。
为什么肝上会长血管瘤	肝海绵状血管瘤是最常见的肝良性肿瘤，多认为起源于肝内的胚胎性血管错构芽，由于某种因素作用，如服用类固醇激素、避孕药以及妇女怀孕等，引起肿瘤样增生而形成。若诊断此病建议到正规医院诊治。
肝上血官瘤是什么原因？	肝海绵状血管瘤是最常见的肝良性肿瘤，多认为起源于肝内的胚胎性血管错构芽，由于某种因素作用，如服用类固醇激素、避孕药以及妇女怀孕等，引起肿瘤样增生而形成。若诊断此病建议到正规医院诊治。
为什么会长肝血管瘤呢？	肝海绵状血管瘤是最常见的肝良性肿瘤，多认为起源于肝内的胚胎性血管错构芽，由于某种因素作用，如服用类固醇激素、避孕药以及妇女怀孕等，引起肿瘤样增生而形成。若诊断此病建议到正规医院诊治。
一般长有肝血管瘤是什么原因引起的？	肝海绵状血管瘤是最常见的肝良性肿瘤，多认为起源于肝内的胚胎性血管错构芽，由于某种因素作用，如服用类固醇激素、避孕药以及妇女怀孕等，引起肿瘤样增生而形成。若诊断此病建议到正规医院诊治。
为什么会长肝血管瘤呢？	肝海绵状血管瘤是最常见的肝良性肿瘤，多认为起源于肝内的胚胎性血管错构芽，由于某种因素作用，如服用类固醇激素、避孕药以及妇女怀孕等，引起肿瘤样增生而形成。若诊断此病建议到正规医院诊治。
为什么会得肝血管瘤？	肝海绵状血管瘤是最常见的肝良性肿瘤，多认为起源于肝内的胚胎性血管错构芽，由于某种因素作用，如服用类固醇激素、避孕药以及妇女怀孕等，引起肿瘤样增生而形成。若诊断此病建议到正规医院诊治。
请问医生肝血管瘤是先天形成的吗？	肝海绵状血管瘤是最常见的肝良性肿瘤，多认为起源于肝内的胚胎性血管错构芽，由于某种因素作用，如服用类固醇激素、避孕药以及妇女怀孕等，引起肿瘤样增生而形成。若诊断此病建议到正规医院诊治。
我肝上长了一个血管瘤。是什么原因引起的	肝海绵状血管瘤是最常见的肝良性肿瘤，多认为起源于肝内的胚胎性血管错构芽，由于某种因素作用，如服用类固醇激素、避孕药以及妇女怀孕等，引起肿瘤样增生而形成。若诊断此病建议到正规医院诊治。
右肝血管瘤怎么引起的	肝海绵状血管瘤是最常见的肝良性肿瘤，多认为起源于肝内的胚胎性血管错构芽，由于某种因素作用，如服用类固醇激素、避孕药以及妇女怀孕等，引起肿瘤样增生而形成。若诊断此病建议到正规医院诊治。
肝内血管瘤是怎么引起的	肝海绵状血管瘤是最常见的肝良性肿瘤，多认为起源于肝内的胚胎性血管错构芽，由于某种因素作用，如服用类固醇激素、避孕药以及妇女怀孕等，引起肿瘤样增生而形成。若诊断此病建议到正规医院诊治。
肝右叶血管瘤是怎么引起的？	肝海绵状血管瘤是最常见的肝良性肿瘤，多认为起源于肝内的胚胎性血管错构芽，由于某种因素作用，如服用类固醇激素、避孕药以及妇女怀孕等，引起肿瘤样增生而形成。若诊断此病建议到正规医院诊治。
肝血管瘤是怎么形成的啊？	肝海绵状血管瘤是最常见的肝良性肿瘤，多认为起源于肝内的胚胎性血管错构芽，由于某种因素作用，如服用类固醇激素、避孕药以及妇女怀孕等，引起肿瘤样增生而形成。若诊断此病建议到正规医院诊治。
肝脏血管瘤一般是先天性的还是后天性的，比例哪个多，	肝海绵状血管瘤是最常见的肝良性肿瘤，多认为起源于肝内的胚胎性血管错构芽，由于某种因素作用，如服用类固醇激素、避孕药以及妇女怀孕等，引起肿瘤样增生而形成。若诊断此病建议到正规医院诊治。
肝血管瘤都是先天的吗？	肝海绵状血管瘤是最常见的肝良性肿瘤，多认为起源于肝内的胚胎性血管错构芽，由于某种因素作用，如服用类固醇激素、避孕药以及妇女怀孕等，引起肿瘤样增生而形成。若诊断此病建议到正规医院诊治。
肝血管瘤到底是怎么引起的	肝海绵状血管瘤是最常见的肝良性肿瘤，多认为起源于肝内的胚胎性血管错构芽，由于某种因素作用，如服用类固醇激素、避孕药以及妇女怀孕等，引起肿瘤样增生而形成。若诊断此病建议到正规医院诊治。
肝血管瘤是天生的还是后天性	肝海绵状血管瘤是最常见的肝良性肿瘤，多认为起源于肝内的胚胎性血管错构芽，由于某种因素作用，如服用类固醇激素、避孕药以及妇女怀孕等，引起肿瘤样增生而形成。若诊断此病建议到正规医院诊治。
肝血管瘤是什么原因引起的啊	肝海绵状血管瘤是最常见的肝良性肿瘤，多认为起源于肝内的胚胎性血管错构芽，由于某种因素作用，如服用类固醇激素、避孕药以及妇女怀孕等，引起肿瘤样增生而形成。若诊断此病建议到正规医院诊治。
肝血管瘤的病因	肝海绵状血管瘤是最常见的肝良性肿瘤，多认为起源于肝内的胚胎性血管错构芽，由于某种因素作用，如服用类固醇激素、避孕药以及妇女怀孕等，引起肿瘤样增生而形成。若诊断此病建议到正规医院诊治。
肝上有血管瘤是什么原因造成的？	肝海绵状血管瘤是最常见的肝良性肿瘤，多认为起源于肝内的胚胎性血管错构芽，由于某种因素作用，如服用类固醇激素、避孕药以及妇女怀孕等，引起肿瘤样增生而形成。若诊断此病建议到正规医院诊治。
肝海绵状血管瘤由什么原因引起	肝海绵状血管瘤是最常见的肝良性肿瘤，多认为起源于肝内的胚胎性血管错构芽，由于某种因素作用，如服用类固醇激素、避孕药以及妇女怀孕等，引起肿瘤样增生而形成。若诊断此病建议到正规医院诊治。
什么原因会导致肝血管瘤	肝海绵状血管瘤是最常见的肝良性肿瘤，多认为起源于肝内的胚胎性血管错构芽，由于某种因素作用，如服用类固醇激素、避孕药以及妇女怀孕等，引起肿瘤样增生而形成。若诊断此病建议到正规医院诊治。
肝上长血管瘤的形成原因是什么？	肝海绵状血管瘤是最常见的肝良性肿瘤，多认为起源于肝内的胚胎性血管错构芽，由于某种因素作用，如服用类固醇激素、避孕药以及妇女怀孕等，引起肿瘤样增生而形成。若诊断此病建议到正规医院诊治。
肝右叶血管瘤引起原因？	肝海绵状血管瘤是最常见的肝良性肿瘤，多认为起源于肝内的胚胎性血管错构芽，由于某种因素作用，如服用类固醇激素、避孕药以及妇女怀孕等，引起肿瘤样增生而形成。若诊断此病建议到正规医院诊治。
肝右叶血管瘤什么原因？	肝海绵状血管瘤是最常见的肝良性肿瘤，多认为起源于肝内的胚胎性血管错构芽，由于某种因素作用，如服用类固醇激素、避孕药以及妇女怀孕等，引起肿瘤样增生而形成。若诊断此病建议到正规医院诊治。
肝血管瘤产生原因是什么？	肝海绵状血管瘤是最常见的肝良性肿瘤，多认为起源于肝内的胚胎性血管错构芽，由于某种因素作用，如服用类固醇激素、避孕药以及妇女怀孕等，引起肿瘤样增生而形成。若诊断此病建议到正规医院诊治。
为什么会得右肝血管瘤？	肝海绵状血管瘤是最常见的肝良性肿瘤，多认为起源于肝内的胚胎性血管错构芽，由于某种因素作用，如服用类固醇激素、避孕药以及妇女怀孕等，引起肿瘤样增生而形成。若诊断此病建议到正规医院诊治。
为什么会患上肝血管瘤啊？	肝海绵状血管瘤是最常见的肝良性肿瘤，多认为起源于肝内的胚胎性血管错构芽，由于某种因素作用，如服用类固醇激素、避孕药以及妇女怀孕等，引起肿瘤样增生而形成。若诊断此病建议到正规医院诊治。
为什么会长有肝血管瘤呢？	肝海绵状血管瘤是最常见的肝良性肿瘤，多认为起源于肝内的胚胎性血管错构芽，由于某种因素作用，如服用类固醇激素、避孕药以及妇女怀孕等，引起肿瘤样增生而形成。若诊断此病建议到正规医院诊治。
胆管癌术后5年没有复发还会复发吗	胆管癌患者手术后五年没有发生复发，不代表之后不会复发。胆管癌是一种恶性程度比较高的肿瘤，即使进行了根治性的切除，仍然有可能复发，术后应当定期随访观察，但是后期随访的时间间隔可以较早期适当的延长。复查的内容包括肿瘤标志物，影像学检查等。
脂肪肝及肝血管瘤	脂肪肝是指由于各种原因引起的肝细胞内脂肪堆积过多的病变，根据病因可分为肥胖性脂肪肝、酒精性脂肪肝，快速减肥性脂肪肝、营养不良性脂肪肝、糖尿病脂肪肝等。一般而言，脂肪肝属可逆性疾病，早期诊断并及时治疗常可恢复正常。肝海绵状血管瘤是最常见的肝良性肿瘤，多认为起源于肝内的胚胎性血管错构芽，由于某种因素作用，如服用类固醇激素、避孕药以及妇女怀孕等，引起肿瘤样增生而形成。目前没有证据证明脂肪肝与肝血管瘤有相关性，但肝血管瘤若合并脂肪肝可能会加重肝脏负担，影响肝脏正常功能，若诊断肝血管瘤和脂肪肝建议到正规医院诊治。
脂肪肝及肝血管瘤	脂肪肝是指由于各种原因引起的肝细胞内脂肪堆积过多的病变，根据病因可分为肥胖性脂肪肝、酒精性脂肪肝，快速减肥性脂肪肝、营养不良性脂肪肝、糖尿病脂肪肝等。一般而言，脂肪肝属可逆性疾病，早期诊断并及时治疗常可恢复正常。肝海绵状血管瘤是最常见的肝良性肿瘤，多认为起源于肝内的胚胎性血管错构芽，由于某种因素作用，如服用类固醇激素、避孕药以及妇女怀孕等，引起肿瘤样增生而形成。目前没有证据证明脂肪肝与肝血管瘤有相关性，但肝血管瘤若合并脂肪肝可能会加重肝脏负担，影响肝脏正常功能，若诊断肝血管瘤和脂肪肝建议到正规医院诊治。
脂肪肝和肝血管瘤是怎么回事？	脂肪肝是指由于各种原因引起的肝细胞内脂肪堆积过多的病变，根据病因可分为肥胖性脂肪肝、酒精性脂肪肝，快速减肥性脂肪肝、营养不良性脂肪肝、糖尿病脂肪肝等。一般而言，脂肪肝属可逆性疾病，早期诊断并及时治疗常可恢复正常。肝海绵状血管瘤是最常见的肝良性肿瘤，多认为起源于肝内的胚胎性血管错构芽，由于某种因素作用，如服用类固醇激素、避孕药以及妇女怀孕等，引起肿瘤样增生而形成。目前没有证据证明脂肪肝与肝血管瘤有相关性，但肝血管瘤若合并脂肪肝可能会加重肝脏负担，影响肝脏正常功能，若诊断肝血管瘤和脂肪肝建议到正规医院诊治。
脂肪肝和肝血管瘤是怎么回事？	脂肪肝是指由于各种原因引起的肝细胞内脂肪堆积过多的病变，根据病因可分为肥胖性脂肪肝、酒精性脂肪肝，快速减肥性脂肪肝、营养不良性脂肪肝、糖尿病脂肪肝等。一般而言，脂肪肝属可逆性疾病，早期诊断并及时治疗常可恢复正常。肝海绵状血管瘤是最常见的肝良性肿瘤，多认为起源于肝内的胚胎性血管错构芽，由于某种因素作用，如服用类固醇激素、避孕药以及妇女怀孕等，引起肿瘤样增生而形成。目前没有证据证明脂肪肝与肝血管瘤有相关性，但肝血管瘤若合并脂肪肝可能会加重肝脏负担，影响肝脏正常功能，若诊断肝血管瘤和脂肪肝建议到正规医院诊治。
脂肪肝能引起肝血管瘤吗	脂肪肝是指由于各种原因引起的肝细胞内脂肪堆积过多的病变，根据病因可分为肥胖性脂肪肝、酒精性脂肪肝，快速减肥性脂肪肝、营养不良性脂肪肝、糖尿病脂肪肝等。一般而言，脂肪肝属可逆性疾病，早期诊断并及时治疗常可恢复正常。肝海绵状血管瘤是最常见的肝良性肿瘤，多认为起源于肝内的胚胎性血管错构芽，由于某种因素作用，如服用类固醇激素、避孕药以及妇女怀孕等，引起肿瘤样增生而形成。目前没有证据证明脂肪肝与肝血管瘤有相关性，但肝血管瘤若合并脂肪肝可能会加重肝脏负担，影响肝脏正常功能，若诊断肝血管瘤和脂肪肝建议到正规医院诊治。
我患有脂肪肝肝血管瘤严重吗？	脂肪肝是指由于各种原因引起的肝细胞内脂肪堆积过多的病变，根据病因可分为肥胖性脂肪肝、酒精性脂肪肝，快速减肥性脂肪肝、营养不良性脂肪肝、糖尿病脂肪肝等。一般而言，脂肪肝属可逆性疾病，早期诊断并及时治疗常可恢复正常。肝海绵状血管瘤是最常见的肝良性肿瘤，多认为起源于肝内的胚胎性血管错构芽，由于某种因素作用，如服用类固醇激素、避孕药以及妇女怀孕等，引起肿瘤样增生而形成。目前没有证据证明脂肪肝与肝血管瘤有相关性，但肝血管瘤若合并脂肪肝可能会加重肝脏负担，影响肝脏正常功能，若诊断肝血管瘤和脂肪肝建议到正规医院诊治。
我做了肝血管瘤微创手术会得肝硬化吗？	肝海绵状血管瘤是最常见的肝良性肿瘤，多认为起源于肝内的胚胎性血管错构芽，由于某种因素作用，如服用类固醇激素、避孕药以及妇女怀孕等，引起肿瘤样增生而形成。肝切除是治疗肝海绵状血管瘤最有效的方法，切除术后复发较为常见，主要原因是肿瘤为多发性或术中切除未尽。复发后可再手术或放射治疗或局部注射硬化治疗。肝硬化是由一种或多种病因长期或反复作用形成的弥漫性肝损害。在我国大多数为肝炎后肝硬化，少部分为酒精性肝硬化和血吸虫性肝硬化。目前没有证据证明两者有相关性，若诊断肝血管瘤或肝硬化建议到正规医院诊治。
我做了肝血管瘤微创手术会得肝硬化吗？	肝海绵状血管瘤是最常见的肝良性肿瘤，多认为起源于肝内的胚胎性血管错构芽，由于某种因素作用，如服用类固醇激素、避孕药以及妇女怀孕等，引起肿瘤样增生而形成。肝切除是治疗肝海绵状血管瘤最有效的方法，切除术后复发较为常见，主要原因是肿瘤为多发性或术中切除未尽。复发后可再手术或放射治疗或局部注射硬化治疗。肝硬化是由一种或多种病因长期或反复作用形成的弥漫性肝损害。在我国大多数为肝炎后肝硬化，少部分为酒精性肝硬化和血吸虫性肝硬化。目前没有证据证明两者有相关性，若诊断肝血管瘤或肝硬化建议到正规医院诊治。
体检肝血管瘤脾大会肝硬化吗？	肝海绵状血管瘤是最常见的肝良性肿瘤，多认为起源于肝内的胚胎性血管错构芽，由于某种因素作用，如服用类固醇激素、避孕药以及妇女怀孕等，引起肿瘤样增生而形成。脾体积增大是脾疾病的主要表现。可分为感染性脾大和非感染性脾大。肝硬化是由一种或多种病因长期或反复作用形成的弥漫性肝损害。在我国大多数为肝炎后肝硬化，少部分为酒精性肝硬化和血吸虫性肝硬化。肝硬化门脉高压时会导致脾大，目前尚没有证据证明肝血管瘤与肝硬化、脾大相关，若诊断肝血管瘤或肝硬化，脾大建议到正规医院诊治。
肝上长了个血管瘤要紧吗	肝海绵状血管瘤是最常见的肝良性肿瘤，小的无症状的肝血管瘤不需治疗，但应每隔3-6个月做B超检查，动态观察肿瘤变化。直径大于10cm或有发生外伤性破裂大出血的可能或肿瘤虽小，但有明显症状或不能排除肝癌的肝血管瘤可行手术切除。本病发展较慢，预后良好。若诊断此病建议到正规医院诊治。肝海绵状血管瘤是最常见的肝良性肿瘤，小的无症状的肝血管瘤不需治疗，但应每隔3-6个月做B超检查，动态观察肿瘤变化。直径大于10cm或有发生外伤性破裂大出血的可能或肿瘤虽小，但有明显症状或不能排除肝癌的肝血管瘤可行手术切除。本病发展较慢，预后良好。若诊断此病建议到正规医院诊治。
肝上长了个血管瘤严重么？	肝海绵状血管瘤是最常见的肝良性肿瘤，小的无症状的肝血管瘤不需治疗，但应每隔3-6个月做B超检查，动态观察肿瘤变化。直径大于10cm或有发生外伤性破裂大出血的可能或肿瘤虽小，但有明显症状或不能排除肝癌的肝血管瘤可行手术切除。本病发展较慢，预后良好。若诊断此病建议到正规医院诊治。
肝血管瘤严重吗？	肝海绵状血管瘤是最常见的肝良性肿瘤，小的无症状的肝血管瘤不需治疗，但应每隔3-6个月做B超检查，动态观察肿瘤变化。直径大于10cm或有发生外伤性破裂大出血的可能或肿瘤虽小，但有明显症状或不能排除肝癌的肝血管瘤可行手术切除。本病发展较慢，预后良好。若诊断此病建议到正规医院诊治。
肝血管瘤可怕吗？	肝海绵状血管瘤是最常见的肝良性肿瘤，小的无症状的肝血管瘤不需治疗，但应每隔3-6个月做B超检查，动态观察肿瘤变化。直径大于10cm或有发生外伤性破裂大出血的可能或肿瘤虽小，但有明显症状或不能排除肝癌的肝血管瘤可行手术切除。本病发展较慢，预后良好。若诊断此病建议到正规医院诊治。
肝子上有血管瘤危险吗？	肝海绵状血管瘤是最常见的肝良性肿瘤，小的无症状的肝血管瘤不需治疗，但应每隔3-6个月做B超检查，动态观察肿瘤变化。直径大于10cm或有发生外伤性破裂大出血的可能或肿瘤虽小，但有明显症状或不能排除肝癌的肝血管瘤可行手术切除。本病发展较慢，预后良好。若诊断此病建议到正规医院诊治。
肝血管瘤可以当兵吗	建议咨询当地征兵办公室和征兵体检标准。肝海绵状血管瘤是最常见的肝良性肿瘤，小的无症状的肝血管瘤不需治疗，但应每隔3-6个月做B超检查，动态观察肿瘤变化。直径大于10cm或有发生外伤性破裂大出血的可能或肿瘤虽小，但有明显症状或不能排除肝癌的肝血管瘤可行手术切除。本病发展较慢，预后良好，若诊断此病建议到正规医院诊治。
肝血管瘤手术切除后，为什么还会复发	肝海绵状血管瘤是最常见的肝良性肿瘤，肝切除是治疗肝海绵状血管瘤最有效的方法，切除术后复发较为常见，主要原因是肿瘤为多发性或术中切除未尽。复发后可再手术或放射治疗或局部注射硬化治疗。若诊断此病建议到正规医院诊治。
广西哪个医院肝血管瘤专科好	肝海绵状血管瘤是最常见的肝良性肿瘤，小的无症状的肝血管瘤不需治疗，但应每隔3-6个月做B超检查，动态观察肿瘤变化。直径大于10cm或有发生外伤性破裂大出血的可能或肿瘤虽小，但有明显症状或不能排除肝癌的肝血管瘤可行手术切除。本病发展较慢，预后良好，关于“广西哪个医院肝血管瘤专科好”请咨询当地卫生部门，若诊断此病建议到正规医院诊治。
有大三阳和肝血管瘤严重吗	肝海绵状血管瘤是最常见的肝良性肿瘤，乙肝大三阳是指慢性乙型肝炎患者或乙肝病毒携带者体内乙肝病毒的免疫学指标：即乙肝表面抗原（HBsAg）、乙肝e抗原（HBeAb）、乙肝核心抗体（抗HBC）三项阳性。小的无症状的肝血管瘤不需治疗，但应每隔3-6个月做B超检查，动态观察肿瘤变化。直径大于10cm或有发生外伤性破裂大出血的可能或肿瘤虽小，但有明显症状或不能排除肝癌的肝血管瘤可行手术切除。目前没有相关证据证明肝血管瘤和乙肝大三阳相关，但乙肝会影响肝脏功能，加重肝脏负担，若诊断肝血管瘤和乙肝大三阳建议到正规医院诊治。
10MMX10MM肝血管瘤能治好吗	肝海绵状血管瘤是最常见的肝良性肿瘤，小的无症状的肝血管瘤不需治疗，但应每隔3-6个月做B超检查，动态观察肿瘤变化。直径大于10cm或有发生外伤性破裂大出血的可能或肿瘤虽小，但有明显症状或不能排除肝癌的肝血管瘤可行手术切除。本病发展较慢，预后良好。若诊断此病建议到正规医院诊治。
成人肝脏血管瘤危险吗	肝海绵状血管瘤是最常见的肝良性肿瘤，小的无症状的肝血管瘤不需治疗，但应每隔3-6个月做B超检查，动态观察肿瘤变化。直径大于10cm或有发生外伤性破裂大出血的可能或肿瘤虽小，但有明显症状或不能排除肝癌的肝血管瘤可行手术切除。本病发展较慢，预后良好。若诊断此病建议到正规医院诊治。
得了肝血管瘤怎么办？	肝海绵状血管瘤是最常见的肝良性肿瘤，小的无症状的肝血管瘤不需治疗，但应每隔3-6个月做B超检查，动态观察肿瘤变化。直径大于10cm或有发生外伤性破裂大出血的可能或肿瘤虽小，但有明显症状或不能排除肝癌的肝血管瘤可行手术切除。本病发展较慢，预后良好。若诊断此病建议到正规医院诊治。
肝海绵状血管瘤要紧吗？	肝海绵状血管瘤是最常见的肝良性肿瘤，小的无症状的肝血管瘤不需治疗，但应每隔3-6个月做B超检查，动态观察肿瘤变化。直径大于10cm或有发生外伤性破裂大出血的可能或肿瘤虽小，但有明显症状或不能排除肝癌的肝血管瘤可行手术切除。本病发展较慢，预后良好。若诊断此病建议到正规医院诊治。
肝内有血管瘤怎么办	肝海绵状血管瘤是最常见的肝良性肿瘤，小的无症状的肝血管瘤不需治疗，但应每隔3-6个月做B超检查，动态观察肿瘤变化。直径大于10cm或有发生外伤性破裂大出血的可能或肿瘤虽小，但有明显症状或不能排除肝癌的肝血管瘤可行手术切除。本病发展较慢，预后良好。若诊断此病建议到正规医院诊治。
肝上有小血管瘤怎么办？	肝海绵状血管瘤是最常见的肝良性肿瘤，小的无症状的肝血管瘤不需治疗，但应每隔3-6个月做B超检查，动态观察肿瘤变化。直径大于10cm或有发生外伤性破裂大出血的可能或肿瘤虽小，但有明显症状或不能排除肝癌的肝血管瘤可行手术切除。本病发展较慢，预后良好。若诊断此病建议到正规医院诊治。
肝上有血管瘤严重吗	肝海绵状血管瘤是最常见的肝良性肿瘤，小的无症状的肝血管瘤不需治疗，但应每隔3-6个月做B超检查，动态观察肿瘤变化。直径大于10cm或有发生外伤性破裂大出血的可能或肿瘤虽小，但有明显症状或不能排除肝癌的肝血管瘤可行手术切除。本病发展较慢，预后良好。若诊断此病建议到正规医院诊治。
肝血管瘤怎么治好的快	肝海绵状血管瘤是最常见的肝良性肿瘤，小的无症状的肝血管瘤不需治疗，但应每隔3-6个月做B超检查，动态观察肿瘤变化。直径大于10cm或有发生外伤性破裂大出血的可能或肿瘤虽小，但有明显症状或不能排除肝癌的肝血管瘤可行手术切除。本病发展较慢，预后良好。若诊断此病建议到正规医院诊治。
肝血管肿瘤严重吗	肝海绵状血管瘤是最常见的肝良性肿瘤，小的无症状的肝血管瘤不需治疗，但应每隔3-6个月做B超检查，动态观察肿瘤变化。直径大于10cm或有发生外伤性破裂大出血的可能或肿瘤虽小，但有明显症状或不能排除肝癌的肝血管瘤可行手术切除。本病发展较慢，预后良好。若诊断此病建议到正规医院诊治。
肝脏血管瘤是不是很可怕？	肝海绵状血管瘤是最常见的肝良性肿瘤，小的无症状的肝血管瘤不需治疗，但应每隔3-6个月做B超检查，动态观察肿瘤变化。直径大于10cm或有发生外伤性破裂大出血的可能或肿瘤虽小，但有明显症状或不能排除肝癌的肝血管瘤可行手术切除。本病发展较慢，预后良好。若诊断此病建议到正规医院诊治。
右边肝上有血管瘤怎么办？	肝海绵状血管瘤是最常见的肝良性肿瘤，小的无症状的肝血管瘤不需治疗，但应每隔3-6个月做B超检查，动态观察肿瘤变化。直径大于10cm或有发生外伤性破裂大出血的可能或肿瘤虽小，但有明显症状或不能排除肝癌的肝血管瘤可行手术切除。本病发展较慢，预后良好。若诊断此病建议到正规医院诊治。
右肝血管瘤该如何处理	肝海绵状血管瘤是最常见的肝良性肿瘤，小的无症状的肝血管瘤不需治疗，但应每隔3-6个月做B超检查，动态观察肿瘤变化。直径大于10cm或有发生外伤性破裂大出血的可能或肿瘤虽小，但有明显症状或不能排除肝癌的肝血管瘤可行手术切除。本病发展较慢，预后良好。若诊断此病建议到正规医院诊治。
右肝血管瘤该如何处理	肝海绵状血管瘤是最常见的肝良性肿瘤，小的无症状的肝血管瘤不需治疗，但应每隔3-6个月做B超检查，动态观察肿瘤变化。直径大于10cm或有发生外伤性破裂大出血的可能或肿瘤虽小，但有明显症状或不能排除肝癌的肝血管瘤可行手术切除。本病发展较慢，预后良好。若诊断此病建议到正规医院诊治。
右肝有血管瘤怎么办	肝海绵状血管瘤是最常见的肝良性肿瘤，小的无症状的肝血管瘤不需治疗，但应每隔3-6个月做B超检查，动态观察肿瘤变化。直径大于10cm或有发生外伤性破裂大出血的可能或肿瘤虽小，但有明显症状或不能排除肝癌的肝血管瘤可行手术切除。本病发展较慢，预后良好。若诊断此病建议到正规医院诊治。
肝血管瘤是怎么回事？	肝海绵状血管瘤是最常见的肝良性肿瘤，多认为起源于肝内的胚胎性血管错构芽，由于某种因素作用，如服用类固醇激素、避孕药以及妇女怀孕等，引起肿瘤样增生而形成。若诊断此病建议到正规医院诊治。
右后叶肝血管瘤的简介和治疗	肝海绵状血管瘤是最常见的肝良性肿瘤，多认为起源于肝内的胚胎性血管错构芽，由于某种因素作用，如服用类固醇激素、避孕药以及妇女怀孕等，引起肿瘤样增生而形成。本病多见于女性，可发生于任何年龄，但以 30-50 岁多见。肿瘤小时可毫无症状，多于体检时发现。小的无症状的肝血管瘤不需治疗，但应每隔3-6个月做B超检查，动态观察肿瘤变化。直径大于10cm或有发生外伤性破裂大出血的可能或肿瘤虽小，但有明显症状或不能排除肝癌的肝血管瘤可行手术切除。本病发展较慢，预后良好，但妊娠可促使瘤体迅速增大，如此时遇意外奸娠或分娩时腹压上升因素，有增加自发性破裂的可能。肝海绵状血管瘤切除术后复发较为常见，主要原因是肿瘤为多发性或术中切除未尽。复发后可再手术或放射治疗或局部注射硬化治疗。若诊断此病建议到正规医院诊治。
得了肝血管瘤能彻底治愈吗？	肝海绵状血管瘤是最常见的肝良性肿瘤，一般不会自动消失，小的无症状的肝血管瘤不需治疗，但应每隔3-6个月做B超检查，动态观察肿瘤变化。直径大于10cm或有发生外伤性破裂大出血的可能或肿瘤虽小，但有明显症状或不能排除肝癌的肝血管瘤可行手术切除。肝切除是治疗肝海绵状血管瘤最有效的方法，切除术后复发较为常见，主要原因是肿瘤为多发性或术中切除未尽。复发后可再手术或放射治疗或局部注射硬化治疗。若诊断此病建议到正规医院诊治。
肝血管瘤可不可以治愈吗？	肝海绵状血管瘤是最常见的肝良性肿瘤，一般不会自动消失，小的无症状的肝血管瘤不需治疗，但应每隔3-6个月做B超检查，动态观察肿瘤变化。直径大于10cm或有发生外伤性破裂大出血的可能或肿瘤虽小，但有明显症状或不能排除肝癌的肝血管瘤可行手术切除。肝切除是治疗肝海绵状血管瘤最有效的方法，切除术后复发较为常见，主要原因是肿瘤为多发性或术中切除未尽。复发后可再手术或放射治疗或局部注射硬化治疗。若诊断此病建议到正规医院诊治。
肝血管瘤能彻底治愈好吗？	肝海绵状血管瘤是最常见的肝良性肿瘤，一般不会自动消失，小的无症状的肝血管瘤不需治疗，但应每隔3-6个月做B超检查，动态观察肿瘤变化。直径大于10cm或有发生外伤性破裂大出血的可能或肿瘤虽小，但有明显症状或不能排除肝癌的肝血管瘤可行手术切除。肝切除是治疗肝海绵状血管瘤最有效的方法，切除术后复发较为常见，主要原因是肿瘤为多发性或术中切除未尽。复发后可再手术或放射治疗或局部注射硬化治疗。若诊断此病建议到正规医院诊治。
肝血管瘤能彻底治愈吗？	肝海绵状血管瘤是最常见的肝良性肿瘤，一般不会自动消失，小的无症状的肝血管瘤不需治疗，但应每隔3-6个月做B超检查，动态观察肿瘤变化。直径大于10cm或有发生外伤性破裂大出血的可能或肿瘤虽小，但有明显症状或不能排除肝癌的肝血管瘤可行手术切除。肝切除是治疗肝海绵状血管瘤最有效的方法，切除术后复发较为常见，主要原因是肿瘤为多发性或术中切除未尽。复发后可再手术或放射治疗或局部注射硬化治疗。若诊断此病建议到正规医院诊治。
肝血管瘤晚期还能不能治愈吗	肝海绵状血管瘤是最常见的肝良性肿瘤，一般不会自动消失，小的无症状的肝血管瘤不需治疗，但应每隔3-6个月做B超检查，动态观察肿瘤变化。直径大于10cm或有发生外伤性破裂大出血的可能或肿瘤虽小，但有明显症状或不能排除肝癌的肝血管瘤可行手术切除。肝切除是治疗肝海绵状血管瘤最有效的方法，切除术后复发较为常见，主要原因是肿瘤为多发性或术中切除未尽。复发后可再手术或放射治疗或局部注射硬化治疗。若诊断此病建议到正规医院诊治。
肝上血管瘤会消失吗？	肝海绵状血管瘤是最常见的肝良性肿瘤，一般不会自动消失，小的无症状的肝血管瘤不需治疗，但应每隔3-6个月做B超检查，动态观察肿瘤变化。直径大于10cm或有发生外伤性破裂大出血的可能或肿瘤虽小，但有明显症状或不能排除肝癌的肝血管瘤可行手术切除。肝切除是治疗肝海绵状血管瘤最有效的方法，切除术后复发较为常见，主要原因是肿瘤为多发性或术中切除未尽。复发后可再手术或放射治疗或局部注射硬化治疗。若诊断此病建议到正规医院诊治。
肝右叶血管瘤会消失吗	肝海绵状血管瘤是最常见的肝良性肿瘤，一般不会自动消失，小的无症状的肝血管瘤不需治疗，但应每隔3-6个月做B超检查，动态观察肿瘤变化。直径大于10cm或有发生外伤性破裂大出血的可能或肿瘤虽小，但有明显症状或不能排除肝癌的肝血管瘤可行手术切除。肝切除是治疗肝海绵状血管瘤最有效的方法，切除术后复发较为常见，主要原因是肿瘤为多发性或术中切除未尽。复发后可再手术或放射治疗或局部注射硬化治疗。若诊断此病建议到正规医院诊治。
得了胆结石肝血管瘤严重吗？	胆结石是指胆道系统包括胆囊或胆管内发生结石的疾病，结石在胆囊内形成后，可刺激胆囊黏膜，不仅可引起胆囊的慢性炎症，而且当结石嵌顿在胆囊颈部或胆囊管后，还可以引起继发感染，导致胆囊的急性炎症。由于结石对胆囊黏膜的慢性刺激，还可能导致胆囊癌的发生，有报告此种胆囊癌的发生率可达1%～2%。对于一些比较大的、药物不起作用的结石可通过手术直接切除胆囊，能快速根除病灶，是目前最好的办法。但手术有一定的适应证。肝海绵状血管瘤是最常见的肝良性肿瘤，小的无症状的肝血管瘤不需治疗，但应每隔3-6个月做B超检查，动态观察肿瘤变化。直径大于10cm或有发生外伤性破裂大出血的可能或肿瘤虽小，但有明显症状或不能排除肝癌的肝血管瘤可行手术切除。肝血管瘤发展较慢，预后良好。若诊断肝血管瘤和胆结石建议到正规医院诊治。
胆结石病会发生癌变吗	慢性胆囊炎和胆结石是胆囊癌的发病诱因，胆囊长期受慢性炎症和胆结石内胆酸、胆碱的刺激，容易使胆囊黏膜发生癌变。但并不是所有的胆结石都会癌变，而且发生率也并不高。但是有了胆结石，还是要积极的消炎利胆，对症处理，必要的时候手术摘除。若诊断胆结石建议到正规医院诊治。
肝母细胞瘤早期能治好吗？	肝母细胞瘤是一种具有多种分化方式的恶性胚胎性肿瘤。它是由类似于胎儿性上皮性肝细胞、胚胎性细胞以及分化的间叶成分组成。大部分的肝母细胞瘤为单发，其治好的几率是较低的。肝母细胞瘤的治疗以手术切除为首选。超声消融治疗联合手术切除将极大提高肝母细胞瘤的完整切除率。若诊断此病建议到正规医院诊治。
肝内胆管结石会误诊为血管瘤吗？	肝内胆管结石一般的情况下不会误诊为血管瘤。B超是肝内胆管结石诊断的首选方法，一般估计诊断准确率为50%-70%，肝内胆管结石的超声图象变化较多，一般要求在结石远端的胆管有扩张才能作出肝内胆管结石的诊断，因肝内管道系统的钙化也具有结石样的影像表现，要是不放心的话，还可以加上做CT检查，因肝内胆管结石主要是含胆红素钙的色素性结石，钙的含量较高，故在CT照片能清楚地显示出来，CT的诊断符合率为50%-60%，CT还能显示出肝门的位置、胆管扩张及肝脏肥大、萎缩的变化，系统地观察个层面CT照片，可以了解结石在肝内胆管分布的情况。若诊断此病建议到正规医院诊治。
肝内多发海绵状血管瘤？	肝海绵状血管瘤是最常见的肝良性肿瘤，多认为起源于肝内的胚胎性血管错构芽，由于某种因素作用，如服用类固醇激素、避孕药以及妇女怀孕等，引起肿瘤样增生而形成。本病多见于女性，可发生于任何年龄，但以 30-50 岁多见。肿瘤小时可毫无症状，多于体检时发现。小的无症状的肝血管瘤不需治疗，但应每隔3-6个月做B超检查，动态观察肿瘤变化。直径大于10cm或有发生外伤性破裂大出血的可能或肿瘤虽小，但有明显症状或不能排除肝癌的肝血管瘤可行手术切除。本病发展较慢，预后良好，但妊娠可促使瘤体迅速增大，如此时遇意外奸娠或分娩时腹压上升因素，有增加自发性破裂的可能。肝海绵状血管瘤切除术后复发较为常见，主要原因是肿瘤为多发性或术中切除未尽。复发后可再手术或放射治疗或局部注射硬化治疗。若诊断此病建议到正规医院诊治。
肝内血管瘤到底影不影响公务员录用	建议咨询相关单位及法律条文。肝海绵状血管瘤是最常见的肝良性肿瘤，小的无症状的肝血管瘤不需治疗，但应每隔3-6个月做B超检查，动态观察肿瘤变化。直径大于10cm或有发生外伤性破裂大出血的可能或肿瘤虽小，但有明显症状或不能排除肝癌的肝血管瘤可行手术切除。本病发展较慢，预后良好，若诊断此病建议到正规医院诊治。
公务员录取体检对肝部血管瘤有何规定	建议咨询相关单位及法律条文。肝海绵状血管瘤是最常见的肝良性肿瘤，小的无症状的肝血管瘤不需治疗，但应每隔3-6个月做B超检查，动态观察肿瘤变化。直径大于10cm或有发生外伤性破裂大出血的可能或肿瘤虽小，但有明显症状或不能排除肝癌的肝血管瘤可行手术切除。本病发展较慢，预后良好，若诊断此病建议到正规医院诊治。
肝上血管瘤可以献血吗	肝海绵状血管瘤是最常见的肝良性肿瘤，小的无症状的肝血管瘤不需治疗，但应每隔3-6个月做B超检查，动态观察肿瘤变化。直径大于10cm或有发生外伤性破裂大出血的可能或肿瘤虽小，但有明显症状或不能排除肝癌的肝血管瘤可行手术切除。有些病人还会出现某些凝血因子减少，合并血小板减少性紫殿，引起出血及溶血而死亡。也有因回心血量增多，心脏负担加重而导致心力衰竭。因此最好不要献血，若诊断此病建议及时到正规医院诊治。
肝上有血管瘤注意事项	肝海绵状血管瘤是最常见的肝良性肿瘤，小的无症状的肝血管瘤不需治疗，但应每隔3-6个月做B超检查，动态观察肿瘤变化。直径大于10cm或有发生外伤性破裂大出血的可能或肿瘤虽小，但有明显症状或不能排除肝癌的肝血管瘤可行手术切除。本病发展较慢，预后良好，但妊娠可促使瘤体迅速增大，如此时遇意外奸娠或分娩时腹压上升因素，有增加自发性破裂的可能。有些病人还会出现某些凝血因子减少，合并血小板减少性紫殿，引起出血及溶血而死亡。也有因回心血量增多，心脏负担加重而导致心力衰竭。肝海绵状血管瘤切除术后复发较为常见，主要原因是肿瘤为多发性或术中切除未尽。复发后可再手术或放射治疗或局部注射硬化治疗。若诊断此病建议到正规医院诊治，定期复查，避免可能造成肝外伤的剧烈运动，保持情绪平稳，清淡饮食，戒烟戒酒。
肝血管瘤，生长速度是不是有点快	肝海绵状血管瘤是最常见的肝良性肿瘤，发展较慢，预后良好，但妊娠可促使瘤体迅速增大，如此时遇意外奸娠或分娩时腹压上升因素，有增加自发性破裂的可能。肝海绵状血管瘤切除术后复发较为常见，主要原因是肿瘤为多发性或术中切除未尽。复发后可再手术或放射治疗或局部注射硬化治疗。若诊断此病建议到正规医院诊治。
肝血管瘤挂哪个科，肝血管瘤挂哪个科？	肝海绵状血管瘤是最常见的肝良性肿瘤，小的无症状的肝血管瘤不需治疗，但应每隔3-6个月做B超检查，动态观察肿瘤变化。直径大于10cm或有发生外伤性破裂大出血的可能或肿瘤虽小，但有明显症状或不能排除肝癌的肝血管瘤可行手术切除。若诊断此病建议到正规医院肝胆外科就诊。
肝脏血管瘤挂哪个科？	肝海绵状血管瘤是最常见的肝良性肿瘤，小的无症状的肝血管瘤不需治疗，但应每隔3-6个月做B超检查，动态观察肿瘤变化。直径大于10cm或有发生外伤性破裂大出血的可能或肿瘤虽小，但有明显症状或不能排除肝癌的肝血管瘤可行手术切除。若诊断此病建议到正规医院肝胆外科就诊。
体检说可能有肝血管瘤,想到医院确诊.挂号要挂什么科室	肝海绵状血管瘤是最常见的肝良性肿瘤，小的无症状的肝血管瘤不需治疗，但应每隔3-6个月做B超检查，动态观察肿瘤变化。直径大于10cm或有发生外伤性破裂大出血的可能或肿瘤虽小，但有明显症状或不能排除肝癌的肝血管瘤可行手术切除。若诊断此病建议到正规医院肝胆外科就诊。
肝血管瘤为什么有时看见有时看不见	肝海绵状血管瘤是最常见的肝良性肿瘤，小的无症状的肝血管瘤不需治疗，但应每隔3-6个月做B超检查，动态观察肿瘤变化。直径大于10cm或有发生外伤性破裂大出血的可能或肿瘤虽小，但有明显症状或不能排除肝癌的肝血管瘤可行手术切除。有时看见有时看不见可能是由于检查手段的差异性，若诊断此病建议到正规医院诊治。
江苏南京看肝血管瘤最好的医院在哪里	肝海绵状血管瘤是最常见的肝良性肿瘤，小的无症状的肝血管瘤不需治疗，但应每隔3-6个月做B超检查，动态观察肿瘤变化。直径大于10cm或有发生外伤性破裂大出血的可能或肿瘤虽小，但有明显症状或不能排除肝癌的肝血管瘤可行手术切除。本病发展较慢，预后良好，关于“江苏南京看肝血管瘤最好的医院在哪里”请咨询当地卫生部门，若诊断此病建议到正规医院诊治。
小血管瘤肝内胆管钙化	肝脏的小血管瘤直径小于5厘米，没有明显的症状不需要手术治疗和其他治疗，定期复查看有无长大就可以。在复查的过程中发现小血管瘤长得比较快，大于5厘米可以考虑手术或者介入等方式治疗，像肝内胆管钙化也是这样的情况，仅仅是因为小结石或者炎症引起的肝内胆管钙化。可能没有什么明显的症状不需要特殊治疗。怀疑有肿瘤的可能，这种情况需要做手术治疗，还需要看有无其他地方转移病变，肿瘤考虑胆管癌。大部分引起黄疸、胆囊肿大还有肝脏肿大和胆道感染的症状，很多发现的时候病情比较晚，没办法做手术根治，只能够采取姑息治疗的方式，控制病情发展，延长生存期。
小血管瘤肝内胆管钙化	肝脏的小血管瘤直径小于5厘米，没有明显的症状不需要手术治疗和其他治疗，定期复查看有无长大就可以。在复查的过程中发现小血管瘤长得比较快，大于5厘米可以考虑手术或者介入等方式治疗，像肝内胆管钙化也是这样的情况，仅仅是因为小结石或者炎症引起的肝内胆管钙化。可能没有什么明显的症状不需要特殊治疗。怀疑有肿瘤的可能，这种情况需要做手术治疗，还需要看有无其他地方转移病变，肿瘤考虑胆管癌。大部分引起黄疸、胆囊肿大还有肝脏肿大和胆道感染的症状，很多发现的时候病情比较晚，没办法做手术根治，只能够采取姑息治疗的方式，控制病情发展，延长生存期。
怎么医生说好多人都有肝血管瘤？	肝海绵状血管瘤是最常见的肝良性肿瘤，多认为起源于肝内的胚胎性血管错构芽，由于某种因素作用，如服用类固醇激素、避孕药以及妇女怀孕等，引起肿瘤样增生而形成。发病率为1%-7%，约占肝良性肿瘤的74%。本病多见于女性，可发生于任何年龄，但以 30-50 岁多见。肿瘤小时可毫无症状，多于体检时发现。若诊断此病建议到正规医院诊治。
肝血管瘤疼痛症状表现？	肝海绵状血管瘤是最常见的肝良性肿瘤，肿瘤小时可毫无症状，多于体检时发现。当肿瘤逐渐增大后，主要表现为肝大或压迫胃、肠等邻近器官，引起上腹部不适，腹胀、腹痛，食欲减退，恶心、乏力、消瘦、嗳气等症状。如肿瘤破裂则出现失血性休克或急腹症症状，如心悸、出汗、头昏、低血压、休克，同时伴有剧烈腹痛、腹肌紧张。若诊断此病建议到正规医院诊治。
肝脏血管瘤变大有哪些症状？	肝海绵状血管瘤是最常见的肝良性肿瘤，肿瘤小时可毫无症状，多于体检时发现。当肿瘤逐渐增大后，主要表现为肝大或压迫胃、肠等邻近器官，引起上腹部不适，腹胀、腹痛，食欲减退，恶心、乏力、消瘦、嗳气等症状。如肿瘤破裂则出现失血性休克或急腹症症状，如心悸、出汗、头昏、低血压、休克，同时伴有剧烈腹痛、腹肌紧张。若诊断此病建议到正规医院诊治。
肝血管瘤有什么症状？	肝海绵状血管瘤是最常见的肝良性肿瘤，肿瘤小时可毫无症状，多于体检时发现。当肿瘤逐渐增大后，主要表现为肝大或压迫胃、肠等邻近器官，引起上腹部不适，腹胀、腹痛，食欲减退，恶心、乏力、消瘦、嗳气等症状。如肿瘤破裂则出现失血性休克或急腹症症状，如心悸、出汗、头昏、低血压、休克，同时伴有剧烈腹痛、腹肌紧张。若诊断此病建议到正规医院诊治。
肝血管瘤疼痛怎么办？	肝海绵状血管瘤是最常见的肝良性肿瘤，肿瘤小时可毫无症状，多于体检时发现。当肿瘤逐渐增大后，主要表现为肝大或压迫胃、肠等邻近器官，引起上腹部不适，腹胀、腹痛，食欲减退，恶心、乏力、消瘦、嗳气等症状。如肿瘤破裂则出现失血性休克或急腹症症状，如心悸、出汗、头昏、低血压、休克，同时伴有剧烈腹痛、腹肌紧张。若诊断此病建议到正规医院诊治。
右边肋骨下疼痛，初步检查是肝血管瘤	肝海绵状血管瘤是最常见的肝良性肿瘤，肿瘤小时可毫无症状，多于体检时发现。当肿瘤逐渐增大后，主要表现为肝大或压迫胃、肠等邻近器官，引起上腹部不适，腹胀、腹痛，食欲减退，恶心、乏力、消瘦、嗳气等症状。如肿瘤破裂则出现失血性休克或急腹症症状，如心悸、出汗、头昏、低血压、休克，同时伴有剧烈腹痛、腹肌紧张。若诊断此病建议到正规医院诊治。
右边肝区后背肋骨处痛是否与肝血管瘤有关	肝海绵状血管瘤是最常见的肝良性肿瘤，肿瘤小时可毫无症状，多于体检时发现。当肿瘤逐渐增大后，主要表现为肝大或压迫胃、肠等邻近器官，引起上腹部不适，腹胀、腹痛，食欲减退，恶心、乏力、消瘦、嗳气等症状。如肿瘤破裂则出现失血性休克或急腹症症状，如心悸、出汗、头昏、低血压、休克，同时伴有剧烈腹痛、腹肌紧张。若诊断此病建议到正规医院诊治。
肝上长良性肿瘤痛吗	肝海绵状血管瘤是最常见的肝良性肿瘤，肿瘤小时可毫无症状，多于体检时发现。当肿瘤逐渐增大后，主要表现为肝大或压迫胃、肠等邻近器官，引起上腹部不适，腹胀、腹痛，食欲减退，恶心、乏力、消瘦、嗳气等症状。如肿瘤破裂则出现失血性休克或急腹症症状，如心悸、出汗、头昏、低血压、休克，同时伴有剧烈腹痛、腹肌紧张。若诊断此病建议到正规医院诊治。
我得了肝血管瘤，肝区痛会痛吗	肝海绵状血管瘤是最常见的肝良性肿瘤，肿瘤小时可毫无症状，多于体检时发现。当肿瘤逐渐增大后，主要表现为肝大或压迫胃、肠等邻近器官，引起上腹部不适，腹胀、腹痛，食欲减退，恶心、乏力、消瘦、嗳气等症状。如肿瘤破裂则出现失血性休克或急腹症症状，如心悸、出汗、头昏、低血压、休克，同时伴有剧烈腹痛、腹肌紧张。若诊断此病建议到正规医院诊治。
我得了肝血管瘤，肝区痛会痛吗	肝海绵状血管瘤是最常见的肝良性肿瘤，肿瘤小时可毫无症状，多于体检时发现。当肿瘤逐渐增大后，主要表现为肝大或压迫胃、肠等邻近器官，引起上腹部不适，腹胀、腹痛，食欲减退，恶心、乏力、消瘦、嗳气等症状。如肿瘤破裂则出现失血性休克或急腹症症状，如心悸、出汗、头昏、低血压、休克，同时伴有剧烈腹痛、腹肌紧张。若诊断此病建议到正规医院诊治。
为什么肝血管瘤会疼痛？	肝海绵状血管瘤是最常见的肝良性肿瘤，肿瘤小时可毫无症状，多于体检时发现。当肿瘤逐渐增大后，主要表现为肝大或压迫胃、肠等邻近器官，引起上腹部不适，腹胀、腹痛，食欲减退，恶心、乏力、消瘦、嗳气等症状。如肿瘤破裂则出现失血性休克或急腹症症状，如心悸、出汗、头昏、低血压、休克，同时伴有剧烈腹痛、腹肌紧张。若诊断此病建议到正规医院诊治。
小的肝血管瘤会引起肝区疼痛吗？	肝海绵状血管瘤是最常见的肝良性肿瘤，肿瘤小时可毫无症状，多于体检时发现。当肿瘤逐渐增大后，主要表现为肝大或压迫胃、肠等邻近器官，引起上腹部不适，腹胀、腹痛，食欲减退，恶心、乏力、消瘦、嗳气等症状。如肿瘤破裂则出现失血性休克或急腹症症状，如心悸、出汗、头昏、低血压、休克，同时伴有剧烈腹痛、腹肌紧张。若诊断此病建议到正规医院诊治。
要是肝血管瘤有时恶心呕吐是和他有关系吗还是和胃有关	肝海绵状血管瘤是最常见的肝良性肿瘤，肿瘤小时可毫无症状，多于体检时发现。当肿瘤逐渐增大后，主要表现为肝大或压迫胃、肠等邻近器官，引起上腹部不适，腹胀、腹痛，食欲减退，恶心、乏力、消瘦、嗳气等症状。如肿瘤破裂则出现失血性休克或急腹症症状，如心悸、出汗、头昏、低血压、休克，同时伴有剧烈腹痛、腹肌紧张。若诊断此病建议到正规医院诊治。
肝血管瘤有时候疼是怎么回事	肝海绵状血管瘤是最常见的肝良性肿瘤，肿瘤小时可毫无症状，多于体检时发现。当肿瘤逐渐增大后，主要表现为肝大或压迫胃、肠等邻近器官，引起上腹部不适，腹胀、腹痛，食欲减退，恶心、乏力、消瘦、嗳气等症状。如肿瘤破裂则出现失血性休克或急腹症症状，如心悸、出汗、头昏、低血压、休克，同时伴有剧烈腹痛、腹肌紧张。若诊断此病建议到正规医院诊治。
肝上长了一个血管瘤，最近肝脏隐隐做痛，请问这是什么	肝海绵状血管瘤是最常见的肝良性肿瘤，肿瘤小时可毫无症状，多于体检时发现。当肿瘤逐渐增大后，主要表现为肝大或压迫胃、肠等邻近器官，引起上腹部不适，腹胀、腹痛，食欲减退，恶心、乏力、消瘦、嗳气等症状。如肿瘤破裂则出现失血性休克或急腹症症状，如心悸、出汗、头昏、低血压、休克，同时伴有剧烈腹痛、腹肌紧张。若诊断此病建议到正规医院诊治。
肝血管瘤疼吗？	肝海绵状血管瘤是最常见的肝良性肿瘤，肿瘤小时可毫无症状，多于体检时发现。当肿瘤逐渐增大后，主要表现为肝大或压迫胃、肠等邻近器官，引起上腹部不适，腹胀、腹痛，食欲减退，恶心、乏力、消瘦、嗳气等症状。如肿瘤破裂则出现失血性休克或急腹症症状，如心悸、出汗、头昏、低血压、休克，同时伴有剧烈腹痛、腹肌紧张。若诊断此病建议到正规医院诊治。
肝血管瘤会隐隐作痛吗？	肝海绵状血管瘤是最常见的肝良性肿瘤，肿瘤小时可毫无症状，多于体检时发现。当肿瘤逐渐增大后，主要表现为肝大或压迫胃、肠等邻近器官，引起上腹部不适，腹胀、腹痛，食欲减退，恶心、乏力、消瘦、嗳气等症状。如肿瘤破裂则出现失血性休克或急腹症症状，如心悸、出汗、头昏、低血压、休克，同时伴有剧烈腹痛、腹肌紧张。若诊断此病建议到正规医院诊治。
肝血管瘤会疼痛吗	肝海绵状血管瘤是最常见的肝良性肿瘤，肿瘤小时可毫无症状，多于体检时发现。当肿瘤逐渐增大后，主要表现为肝大或压迫胃、肠等邻近器官，引起上腹部不适，腹胀、腹痛，食欲减退，恶心、乏力、消瘦、嗳气等症状。如肿瘤破裂则出现失血性休克或急腹症症状，如心悸、出汗、头昏、低血压、休克，同时伴有剧烈腹痛、腹肌紧张。若诊断此病建议到正规医院诊治。
肝脏血管瘤，吃饭吃多了会有胀痛反应吗	肝海绵状血管瘤是最常见的肝良性肿瘤，肿瘤小时可毫无症状，多于体检时发现。当肿瘤逐渐增大后，主要表现为肝大或压迫胃、肠等邻近器官，引起上腹部不适，腹胀、腹痛，食欲减退，恶心、乏力、消瘦、嗳气等症状。如肿瘤破裂则出现失血性休克或急腹症症状，如心悸、出汗、头昏、低血压、休克，同时伴有剧烈腹痛、腹肌紧张。若诊断此病建议到正规医院诊治。
肝血管瘤有哪些症状	肝海绵状血管瘤是最常见的肝良性肿瘤，肿瘤小时可毫无症状，多于体检时发现。当肿瘤逐渐增大后，主要表现为肝大或压迫胃、肠等邻近器官，引起上腹部不适，腹胀、腹痛，食欲减退，恶心、乏力、消瘦、嗳气等症状。如肿瘤破裂则出现失血性休克或急腹症症状，如心悸、出汗、头昏、低血压、休克，同时伴有剧烈腹痛、腹肌紧张。若诊断此病建议到正规医院诊治。
肝血管瘤会导致肝区疼痛吗？	肝海绵状血管瘤是最常见的肝良性肿瘤，肿瘤小时可毫无症状，多于体检时发现。当肿瘤逐渐增大后，主要表现为肝大或压迫胃、肠等邻近器官，引起上腹部不适，腹胀、腹痛，食欲减退，恶心、乏力、消瘦、嗳气等症状。如肿瘤破裂则出现失血性休克或急腹症症状，如心悸、出汗、头昏、低血压、休克，同时伴有剧烈腹痛、腹肌紧张。若诊断此病建议到正规医院诊治。
肝血管瘤会引起肝区疼痛或后背疼痛吗?	肝海绵状血管瘤是最常见的肝良性肿瘤，肿瘤小时可毫无症状，多于体检时发现。当肿瘤逐渐增大后，主要表现为肝大或压迫胃、肠等邻近器官，引起上腹部不适，腹胀、腹痛，食欲减退，恶心、乏力、消瘦、嗳气等症状。如肿瘤破裂则出现失血性休克或急腹症症状，如心悸、出汗、头昏、低血压、休克，同时伴有剧烈腹痛、腹肌紧张。若诊断此病建议到正规医院诊治。
肝血管瘤会使人消瘦么	肝海绵状血管瘤是最常见的肝良性肿瘤，肿瘤小时可毫无症状，多于体检时发现。当肿瘤逐渐增大后，主要表现为肝大或压迫胃、肠等邻近器官，引起上腹部不适，腹胀、腹痛，食欲减退，恶心、乏力、消瘦、嗳气等症状。如肿瘤破裂则出现失血性休克或急腹症症状，如心悸、出汗、头昏、低血压、休克，同时伴有剧烈腹痛、腹肌紧张。若诊断此病建议到正规医院诊治。
肝血管瘤患者可能会有哪些症状	肝海绵状血管瘤是最常见的肝良性肿瘤，肿瘤小时可毫无症状，多于体检时发现。当肿瘤逐渐增大后，主要表现为肝大或压迫胃、肠等邻近器官，引起上腹部不适，腹胀、腹痛，食欲减退，恶心、乏力、消瘦、嗳气等症状。如肿瘤破裂则出现失血性休克或急腹症症状，如心悸、出汗、头昏、低血压、休克，同时伴有剧烈腹痛、腹肌紧张。若诊断此病建议到正规医院诊治。
肝血管瘤的症状表现是什么？	肝海绵状血管瘤是最常见的肝良性肿瘤，肿瘤小时可毫无症状，多于体检时发现。当肿瘤逐渐增大后，主要表现为肝大或压迫胃、肠等邻近器官，引起上腹部不适，腹胀、腹痛，食欲减退，恶心、乏力、消瘦、嗳气等症状。如肿瘤破裂则出现失血性休克或急腹症症状，如心悸、出汗、头昏、低血压、休克，同时伴有剧烈腹痛、腹肌紧张。若诊断此病建议到正规医院诊治。
肝血管瘤会引起哪些不适感？	肝海绵状血管瘤是最常见的肝良性肿瘤，肿瘤小时可毫无症状，多于体检时发现。当肿瘤逐渐增大后，主要表现为肝大或压迫胃、肠等邻近器官，引起上腹部不适，腹胀、腹痛，食欲减退，恶心、乏力、消瘦、嗳气等症状。如肿瘤破裂则出现失血性休克或急腹症症状，如心悸、出汗、头昏、低血压、休克，同时伴有剧烈腹痛、腹肌紧张。若诊断此病建议到正规医院诊治。
肝血管瘤能引起乏力吗？	肝海绵状血管瘤是最常见的肝良性肿瘤，肿瘤小时可毫无症状，多于体检时发现。当肿瘤逐渐增大后，主要表现为肝大或压迫胃、肠等邻近器官，引起上腹部不适，腹胀、腹痛，食欲减退，恶心、乏力、消瘦、嗳气等症状。如肿瘤破裂则出现失血性休克或急腹症症状，如心悸、出汗、头昏、低血压、休克，同时伴有剧烈腹痛、腹肌紧张。若诊断此病建议到正规医院诊治。
肝血管瘤主要有哪些症状？	肝海绵状血管瘤是最常见的肝良性肿瘤，肿瘤小时可毫无症状，多于体检时发现。当肿瘤逐渐增大后，主要表现为肝大或压迫胃、肠等邻近器官，引起上腹部不适，腹胀、腹痛，食欲减退，恶心、乏力、消瘦、嗳气等症状。如肿瘤破裂则出现失血性休克或急腹症症状，如心悸、出汗、头昏、低血压、休克，同时伴有剧烈腹痛、腹肌紧张。若诊断此病建议到正规医院诊治。
肝血管瘤都有什么症状	肝海绵状血管瘤是最常见的肝良性肿瘤，肿瘤小时可毫无症状，多于体检时发现。当肿瘤逐渐增大后，主要表现为肝大或压迫胃、肠等邻近器官，引起上腹部不适，腹胀、腹痛，食欲减退，恶心、乏力、消瘦、嗳气等症状。如肿瘤破裂则出现失血性休克或急腹症症状，如心悸、出汗、头昏、低血压、休克，同时伴有剧烈腹痛、腹肌紧张。若诊断此病建议到正规医院诊治。
肝血管瘤会不会疼	肝海绵状血管瘤是最常见的肝良性肿瘤，肿瘤小时可毫无症状，多于体检时发现。当肿瘤逐渐增大后，主要表现为肝大或压迫胃、肠等邻近器官，引起上腹部不适，腹胀、腹痛，食欲减退，恶心、乏力、消瘦、嗳气等症状。如肿瘤破裂则出现失血性休克或急腹症症状，如心悸、出汗、头昏、低血压、休克，同时伴有剧烈腹痛、腹肌紧张。若诊断此病建议到正规医院诊治。
肝血管瘤的主要症状有哪些？	肝海绵状血管瘤是最常见的肝良性肿瘤，肿瘤小时可毫无症状，多于体检时发现。当肿瘤逐渐增大后，主要表现为肝大或压迫胃、肠等邻近器官，引起上腹部不适，腹胀、腹痛，食欲减退，恶心、乏力、消瘦、嗳气等症状。如肿瘤破裂则出现失血性休克或急腹症症状，如心悸、出汗、头昏、低血压、休克，同时伴有剧烈腹痛、腹肌紧张。若诊断此病建议到正规医院诊治。
患有肝血管瘤！最近总是全身无力	肝海绵状血管瘤是最常见的肝良性肿瘤，肿瘤小时可毫无症状，多于体检时发现。当肿瘤逐渐增大后，主要表现为肝大或压迫胃、肠等邻近器官，引起上腹部不适，腹胀、腹痛，食欲减退，恶心、乏力、消瘦、嗳气等症状。如肿瘤破裂则出现失血性休克或急腹症症状，如心悸、出汗、头昏、低血压、休克，同时伴有剧烈腹痛、腹肌紧张。若诊断此病建议到正规医院诊治。
很小的肝血管瘤也会疼吗?	肝海绵状血管瘤是最常见的肝良性肿瘤，肿瘤小时可毫无症状，多于体检时发现。当肿瘤逐渐增大后，主要表现为肝大或压迫胃、肠等邻近器官，引起上腹部不适，腹胀、腹痛，食欲减退，恶心、乏力、消瘦、嗳气等症状。如肿瘤破裂则出现失血性休克或急腹症症状，如心悸、出汗、头昏、低血压、休克，同时伴有剧烈腹痛、腹肌紧张。若诊断此病建议到正规医院诊治。
得了肝血管瘤人会消瘦吗	肝海绵状血管瘤是最常见的肝良性肿瘤，肿瘤小时可毫无症状，多于体检时发现。当肿瘤逐渐增大后，主要表现为肝大或压迫胃、肠等邻近器官，引起上腹部不适，腹胀、腹痛，食欲减退，恶心、乏力、消瘦、嗳气等症状。如肿瘤破裂则出现失血性休克或急腹症症状，如心悸、出汗、头昏、低血压、休克，同时伴有剧烈腹痛、腹肌紧张。若诊断此病建议到正规医院诊治。
肝右叶血管瘤会痛吗	肝海绵状血管瘤是最常见的肝良性肿瘤，肿瘤小时可毫无症状，多于体检时发现。当肿瘤逐渐增大后，主要表现为肝大或压迫胃、肠等邻近器官，引起上腹部不适，腹胀、腹痛，食欲减退，恶心、乏力、消瘦、嗳气等症状。如肿瘤破裂则出现失血性休克或急腹症症状，如心悸、出汗、头昏、低血压、休克，同时伴有剧烈腹痛、腹肌紧张。若诊断此病建议到正规医院诊治。
肝血管瘤会痛吗	肝海绵状血管瘤是最常见的肝良性肿瘤，肿瘤小时可毫无症状，多于体检时发现。当肿瘤逐渐增大后，主要表现为肝大或压迫胃、肠等邻近器官，引起上腹部不适，腹胀、腹痛，食欲减退，恶心、乏力、消瘦、嗳气等症状。如肿瘤破裂则出现失血性休克或急腹症症状，如心悸、出汗、头昏、低血压、休克，同时伴有剧烈腹痛、腹肌紧张。若诊断此病建议到正规医院诊治。
肝血管瘤会胸闷吗?	肝海绵状血管瘤是最常见的肝良性肿瘤，肿瘤小时可毫无症状，多于体检时发现。当肿瘤逐渐增大后，主要表现为肝大或压迫胃、肠等邻近器官，引起上腹部不适，腹胀、腹痛，食欲减退，恶心、嗳气等症状。如肿瘤破裂则出现失血性休克或急腹症症状。胸闷可能和血管瘤有一定关系，若发现上述症状建议到正规医院诊治，做胸片、心电图等帮助诊断。
肝血管瘤会引起后背疼痛吗？	肝海绵状血管瘤是最常见的肝良性肿瘤，肿瘤小时可毫无症状，多于体检时发现。当肿瘤逐渐增大后，主要表现为肝大或压迫胃、肠等邻近器官，引起上腹部不适，腹胀、腹痛，食欲减退，恶心、嗳气等症状。如肿瘤破裂则出现失血性休克或急腹症症状。肝血管瘤会出现肝区疼痛，一般不会出现后背疼痛，若发现上述症状请于正规医院诊治，排除腰椎间盘突出，肩背部肌肉劳损等疾病。
肝血管瘤会使人腰酸背痛吗？	肝海绵状血管瘤是最常见的肝良性肿瘤，肿瘤小时可毫无症状，多于体检时发现。当肿瘤逐渐增大后，主要表现为肝大或压迫胃、肠等邻近器官，引起上腹部不适，腹胀、腹痛，食欲减退，恶心、嗳气等症状。如肿瘤破裂则出现失血性休克或急腹症症状。肝血管瘤会出现肝区疼痛，一般不会出现后背疼痛，若发现上述症状请于正规医院诊治，排除腰椎间盘突出，肩背部肌肉劳损等疾病。
肝血管瘤肝区会不舒服和疼吗？后背也会疼吗？	肝海绵状血管瘤是最常见的肝良性肿瘤，肿瘤小时可毫无症状，多于体检时发现。当肿瘤逐渐增大后，主要表现为肝大或压迫胃、肠等邻近器官，引起上腹部不适，腹胀、腹痛，食欲减退，恶心、嗳气等症状。如肿瘤破裂则出现失血性休克或急腹症症状。肝血管瘤会出现肝区疼痛，一般不会出现后背疼痛，若发现上述症状请于正规医院诊治，排除腰椎间盘突出，肩背部肌肉劳损等疾病。
肝血管瘤会引起腰疼吗	肝海绵状血管瘤是最常见的肝良性肿瘤，肿瘤小时可毫无症状，多于体检时发现。当肿瘤逐渐增大后，主要表现为肝大或压迫胃、肠等邻近器官，引起上腹部不适，腹胀、腹痛，食欲减退，恶心、嗳气等症状。如肿瘤破裂则出现失血性休克或急腹症症状。肝血管瘤会出现肝区疼痛，一般不会出现后背疼痛，若发现上述症状请于正规医院诊治，排除腰椎间盘突出，肩背部肌肉劳损等疾病。
肝血管瘤会引起腰酸背痛吗	肝海绵状血管瘤是最常见的肝良性肿瘤，肿瘤小时可毫无症状，多于体检时发现。当肿瘤逐渐增大后，主要表现为肝大或压迫胃、肠等邻近器官，引起上腹部不适，腹胀、腹痛，食欲减退，恶心、嗳气等症状。如肿瘤破裂则出现失血性休克或急腹症症状。肝血管瘤会出现肝区疼痛，一般不会出现后背疼痛，若发现上述症状请于正规医院诊治，排除腰椎间盘突出，肩背部肌肉劳损等疾病。
肝血管瘤会引起疼痛吗？	肝海绵状血管瘤是最常见的肝良性肿瘤，肿瘤小时可毫无症状，多于体检时发现。当肿瘤逐渐增大后，主要表现为肝大或压迫胃、肠等邻近器官，引起上腹部不适，腹胀、腹痛，食欲减退，恶心、嗳气等症状。如肿瘤破裂则出现失血性休克或急腹症症状。肝血管瘤会出现肝区疼痛，一般不会出现后背疼痛，若发现上述症状请于正规医院诊治，排除腰椎间盘突出，肩背部肌肉劳损等疾病。
肝血管瘤会导致腰痛吗？	肝海绵状血管瘤是最常见的肝良性肿瘤，肿瘤小时可毫无症状，多于体检时发现。当肿瘤逐渐增大后，主要表现为肝大或压迫胃、肠等邻近器官，引起上腹部不适，腹胀、腹痛，食欲减退，恶心、嗳气等症状。如肿瘤破裂则出现失血性休克或急腹症症状。肝血管瘤会出现肝区疼痛，一般不会出现后背疼痛，若发现上述症状请于正规医院诊治，排除腰椎间盘突出，肩背部肌肉劳损等疾病。
肝血管瘤会不会导致后背疼？	肝海绵状血管瘤是最常见的肝良性肿瘤，肿瘤小时可毫无症状，多于体检时发现。当肿瘤逐渐增大后，主要表现为肝大或压迫胃、肠等邻近器官，引起上腹部不适，腹胀、腹痛，食欲减退，恶心、嗳气等症状。如肿瘤破裂则出现失血性休克或急腹症症状。肝血管瘤会出现肝区疼痛，一般不会出现后背疼痛，若发现上述症状请于正规医院诊治，排除腰椎间盘突出，肩背部肌肉劳损等疾病。
肝血管瘤会引起头晕心慌吗？	肝海绵状血管瘤是最常见的肝良性肿瘤，肿瘤小时可毫无症状，多于体检时发现。当肿瘤逐渐增大后，主要表现为肝大或压迫胃、肠等邻近器官，引起上腹部不适，腹胀、腹痛，食欲减退，恶心、嗳气等症状。如肿瘤破裂则出现失血性休克或急腹症症状。肝血管瘤一般不会引起头晕心慌，若发现上述症状建议到正规医院诊治。
肝血管瘤会导致头晕吗？	肝海绵状血管瘤是最常见的肝良性肿瘤，肿瘤小时可毫无症状，多于体检时发现。当肿瘤逐渐增大后，主要表现为肝大或压迫胃、肠等邻近器官，引起上腹部不适，腹胀、腹痛，食欲减退，恶心、嗳气等症状。如肿瘤破裂则出现失血性休克或急腹症症状。肝血管瘤一般不会引起头晕心慌，若发现上述症状建议到正规医院诊治。
肝血管瘤会引起高血压吗	肝海绵状血管瘤是最常见的肝良性肿瘤，肿瘤小时可毫无症状，多于体检时发现。当肿瘤逐渐增大后，主要表现为肝大或压迫胃、肠等邻近器官，引起上腹部不适，腹胀、腹痛，食欲减退，恶心、嗳气等症状。如肿瘤破裂则出现失血性休克或急腹症症状。肝血管瘤一般不会引起高血压，若发现上述症状建议到正规医院诊治。
肝血管瘤会贫血吗	肝海绵状血管瘤是最常见的肝良性肿瘤，肿瘤小时可毫无症状，多于体检时发现。当肿瘤逐渐增大后，主要表现为肝大或压迫胃、肠等邻近器官，引起上腹部不适，腹胀、腹痛，食欲减退，恶心、嗳气等症状。如肿瘤破裂则出现失血性休克或急腹症症状。有些病人还会出现某些凝血因子减少，合并血小板减少性紫殿，引起出血及溶血而死亡。肝血管瘤有可能造成轻度贫血，若诊断此病建议到正规医院诊治。
胃部痛，拉肚子和肝血管瘤有关系吗	肝海绵状血管瘤是最常见的肝良性肿瘤，肿瘤小时可毫无症状，多于体检时发现。当肿瘤逐渐增大后，主要表现为肝大或压迫胃、肠等邻近器官，引起上腹部不适，腹胀、腹痛，食欲减退，恶心、嗳气等症状。如肿瘤破裂则出现失血性休克或急腹症症状。胃部痛，拉肚子可能和肝血管瘤有一定关系，若发现上述症状建议到正规医院诊治，行影像学检查如X光片、CT等，必要时胃肠镜检查以明确诊断。
肝血管瘤疼痛正常吗？怎样治疗？	肝海绵状血管瘤是最常见的肝良性肿瘤，肿瘤小时可毫无症状，多因做B超检查或其他疾病做剖腹术时才发现。当肿瘤逐渐增大后，主要表现为肝大或压迫胃、肠等邻近器官，引起上腹部不适，腹胀、腹痛，食欲减退，恶心、嗳气等症状。如肿瘤破裂则出现失血性休克或急腹症症状。小的无症状的肝血管瘤不需治疗，但应每隔3-6个月做B超检查，动态观察肿瘤变化。直径大于10cm或有发生外伤性破裂大出血的可能或肿瘤虽小，但有明显症状或不能排除肝癌的肝血管瘤可行手术切除。若诊断此病建议到正规医院诊治。
肝血管瘤会自动消失吗	肝海绵状血管瘤是最常见的肝良性肿瘤，一般不会自动消失，小的无症状的肝血管瘤不需治疗，但应每隔3-6个月做B超检查，动态观察肿瘤变化。直径大于10cm或有发生外伤性破裂大出血的可能或肿瘤虽小，但有明显症状或不能排除肝癌的肝血管瘤可行手术切除。肝切除是治疗肝海绵状血管瘤最有效的方法，切除术后复发较为常见，主要原因是肿瘤为多发性或术中切除未尽。复发后可再手术或放射治疗或局部注射硬化治疗。若诊断此病建议到正规医院诊治。
肝血管瘤是否属于肿瘤？	肝海绵状血管瘤是最常见的肝良性肿瘤，多认为起源于肝内的胚胎性血管错构芽，由于某种因素作用，如服用类固醇激素、避孕药以及妇女怀孕等，引起肿瘤样增生而形成。若诊断此病建议到正规医院诊治。
肝血管瘤与生气有关吗	肝海绵状血管瘤是最常见的肝良性肿瘤，多认为起源于先天性肝内末梢血管发育异常，由于某种因素作用，如服用类固醇激素、避孕药以及妇女怀孕等，引起肿瘤样增生而形成。目前缺乏证据显示情绪激动等因素与血管瘤的发生有关。若诊断此病建议到正规医院诊治。
肝上血管瘤是什么样子？	肝海绵状血管瘤是最常见的肝良性肿瘤，肿瘤质地柔软，切面呈蜂窝状，内充满血液，可压缩，状如海绵，故称肝海绵状血管瘤。本病可单发，也可多发，左右肝叶均可发生，但以肝右叶多见。肿瘤大小不一，小者仅在显微镜下才能确诊，大者重达十余千克。若诊断此病建议到正规医院诊治。
我有个肝血管瘤肝区有点疼痛该怎么办	肝海绵状血管瘤是最常见的肝良性肿瘤，小的无症状的肝血管瘤不需治疗，但应每隔3-6个月做B超检查，动态观察肿瘤变化。直径大于10cm或有发生外伤性破裂大出血的可能或肿瘤虽小，但有明显症状或不能排除肝癌的肝血管瘤可行手术切除。本病发展较慢，预后良好。若诊断此病建议到正规医院诊治。
我有个肝血管瘤肝区有点疼痛该怎么办	肝海绵状血管瘤是最常见的肝良性肿瘤，小的无症状的肝血管瘤不需治疗，但应每隔3-6个月做B超检查，动态观察肿瘤变化。直径大于10cm或有发生外伤性破裂大出血的可能或肿瘤虽小，但有明显症状或不能排除肝癌的肝血管瘤可行手术切除。本病发展较慢，预后良好。若诊断此病建议到正规医院诊治。
肝上的血管瘤很疼怎么办	肝海绵状血管瘤是最常见的肝良性肿瘤，小的无症状的肝血管瘤不需治疗，但应每隔3-6个月做B超检查，动态观察肿瘤变化。直径大于10cm或有发生外伤性破裂大出血的可能或肿瘤虽小，但有明显症状或不能排除肝癌的肝血管瘤可行手术切除。本病发展较慢，预后良好。若诊断此病建议到正规医院诊治。
肝血管瘤引起肝区疼痛怎么办？	肝海绵状血管瘤是最常见的肝良性肿瘤，小的无症状的肝血管瘤不需治疗，但应每隔3-6个月做B超检查，动态观察肿瘤变化。直径大于10cm或有发生外伤性破裂大出血的可能或肿瘤虽小，但有明显症状或不能排除肝癌的肝血管瘤可行手术切除。本病发展较慢，预后良好。若诊断此病建议到正规医院诊治。
出现肝腹水是肝癌晚期要死的症状吗？	腹水考虑是肝硬化或者肝癌的晚期，可以给予一些对症治疗，保肝利尿，同时注意基础疾病的治疗，必要时可以给予白蛋白支持治疗，这种时候病人的预后是非常差的，生存期比较短，注意减轻患者的痛苦。如有上述症状请于正规医院就诊。
肝脏血管瘤为什么变大？	肝海绵状血管瘤是最常见的肝良性肿瘤，本病发展缓慢，病程可达数年至数十年之久，肿瘤增大原因尚没有定论，但内分泌因素如女性青春期、妊娠、口服避孕药等可促使瘤体迅速增大。若诊断此病建议到正规医院诊治。
肝囊肿高烧不退，有没有肝癌的可能	肝脓肿会发烧，肝囊肿一般不会发烧，建议及时到正规医院诊治，做增强CT或者MRI以明确诊断，并可以排除肝癌。
肝血管瘤做了介入手术半年了。经常背疼，怎么办	肝海绵状血管瘤是最常见的肝良性肿瘤，肿瘤小时可毫无症状，多于体检时发现。当肿瘤逐渐增大后，主要表现为肝大或压迫胃、肠等邻近器官，引起上腹部不适，腹胀、腹痛，食欲减退，恶心、嗳气等症状。如肿瘤破裂则出现失血性休克或急腹症症状。肝血管瘤介入之后一般很少出现肩背部疼痛，建议到正规医院就诊，定期复查腹部B超，注意排除腰椎间盘突出，肩背部肌肉劳损等疾病。
肝血管瘤介入手术做了一年多了为什么还痛，并且长大了	肝海绵状血管瘤是最常见的肝良性肿瘤，肿瘤小时可毫无症状，多于体检时发现。当肿瘤逐渐增大后，主要表现为肝大或压迫胃、肠等邻近器官，引起上腹部不适，腹胀、腹痛，食欲减退，恶心、嗳气等症状。介入治疗有一定可能无法根治血管瘤，也存在其余部位血管瘤增大的可能性，若发现上述症状建议到正规医院诊治。
肝血管瘤如果破裂了会怎么样	肝海绵状血管瘤是最常见的肝良性肿瘤，如果肿瘤发生破裂，会出现腹腔内出血，心悸、出汗、头昏、低血压、休克等症状，同时伴有剧烈腹痛、腹肌紧张，偶有肿瘤带蒂者，当发生扭转时也可出现急腹症症状。若诊断此病建议到正规医院诊治。
肝脓肿会不会转成肝癌	肝脓肿一般是由于细菌感染引起的，目前没有证据证明肝脓肿会导致肝癌。建议到正规医院就诊，及时用抗感染药物治疗，针对较大的肝脓肿给予穿刺排脓治疗。
肝囊肿会不会病变成肝癌	肝囊肿是比较常见的一种肝脏良性疾病，主要有寄生虫性、非寄生虫性肝囊肿，非寄生虫性肝囊肿可分为先天性、创伤性、炎症性和肿瘤性囊肿。肝癌是起源于上皮组织的原发性肝恶性肿瘤，可能与肝硬化、病毒性肝炎、黄曲霉毒素相关，目前没有证据证明肝囊肿会发展为肝癌，建议发现肝囊肿或肝癌到正规医院就诊。
良性肝肿瘤有什么症状？	良性肝肿瘤最常见的是肝血管瘤和肝囊肿，一般没有特殊症状。但肝囊肿和肝血管瘤会逐渐增大，有一部分病人出现压迫症状，引起上腹部不适，腹胀、腹痛，食欲减退，恶心、嗳气等症状。建议及时到正规医院就诊。
肝良性肿瘤症状？	良性肝肿瘤最常见的是肝血管瘤和肝囊肿，一般没有特殊症状。但肝囊肿和肝血管瘤会逐渐增大，有一部分病人出现压迫症状，引起上腹部不适，腹胀、腹痛，食欲减退，恶心、嗳气等症状。建议及时到正规医院就诊。
转氨酶高和肝血管瘤有关系吗？	肝海绵状血管瘤是最常见的肝良性肿瘤，实验室检查包括血常规、肝功能如转氨酶、胆红素，肿瘤标志物如甲胎蛋白多正常，有些病人会出现某些凝血因子减少，合并血小板减少性紫殿，引起出血及溶血，此时会出现血常规的异常。建议到正规医院诊治，进一步检查以排除其他肝脏疾病。
你好！请问肝脏血管瘤是否可以引起甲胎蛋白升高吗	肝海绵状血管瘤是最常见的肝良性肿瘤，实验室检查包括血常规、肝功能如转氨酶、胆红素，肿瘤标志物如甲胎蛋白多正常，有些病人会出现某些凝血因子减少，合并血小板减少性紫殿，引起出血及溶血，此时会出现血常规的异常。建议到正规医院诊治，进一步检查以排除其他肝脏疾病。
转氨酶高和肝血管瘤有关系吗？	肝海绵状血管瘤是最常见的肝良性肿瘤，实验室检查包括血常规、肝功能如转氨酶、胆红素，肿瘤标志物如甲胎蛋白多正常，有些病人会出现某些凝血因子减少，合并血小板减少性紫殿，引起出血及溶血，此时会出现血常规的异常。建议到正规医院诊治，进一步检查以排除其他肝脏疾病。
肝血管瘤会引起胆红素高吗？	肝海绵状血管瘤是最常见的肝良性肿瘤，实验室检查包括血常规、肝功能如转氨酶、胆红素，肿瘤标志物如甲胎蛋白多正常，有些病人会出现某些凝血因子减少，合并血小板减少性紫殿，引起出血及溶血，此时会出现血常规的异常。建议到正规医院诊治，进一步检查以排除其他肝脏疾病。
肝血管瘤会引起甲胎蛋白升高吗？	肝海绵状血管瘤是最常见的肝良性肿瘤，实验室检查包括血常规、肝功能如转氨酶、胆红素，肿瘤标志物如甲胎蛋白多正常，有些病人会出现某些凝血因子减少，合并血小板减少性紫殿，引起出血及溶血，此时会出现血常规的异常。建议到正规医院诊治，进一步检查以排除其他肝脏疾病。
肝血管瘤会引起直接胆红素偏高吗	肝海绵状血管瘤是最常见的肝良性肿瘤，实验室检查包括血常规、肝功能如转氨酶、胆红素，肿瘤标志物如甲胎蛋白多正常，有些病人会出现某些凝血因子减少，合并血小板减少性紫殿，引起出血及溶血，此时会出现血常规的异常。建议到正规医院诊治，进一步检查以排除其他肝脏疾病。
肝血管瘤会引起转氨酶高吗	肝海绵状血管瘤是最常见的肝良性肿瘤，实验室检查包括血常规、肝功能如转氨酶、胆红素，肿瘤标志物如甲胎蛋白多正常，有些病人会出现某些凝血因子减少，合并血小板减少性紫殿，引起出血及溶血，此时会出现血常规的异常。建议到正规医院诊治，进一步检查以排除其他肝脏疾病。
肝部血管瘤会引起转氨酶升高吗	肝海绵状血管瘤是最常见的肝良性肿瘤，实验室检查包括血常规、肝功能如转氨酶、胆红素，肿瘤标志物如甲胎蛋白多正常，有些病人会出现某些凝血因子减少，合并血小板减少性紫殿，引起出血及溶血，此时会出现血常规的异常。建议到正规医院诊治，进一步检查以排除其他肝脏疾病。
血常规可以测出肝血管瘤吗	肝海绵状血管瘤是最常见的肝良性肿瘤，实验室检查包括血常规、肝功能如转氨酶、胆红素，肿瘤标志物如甲胎蛋白多正常，有些病人会出现某些凝血因子减少，合并血小板减少性紫殿，引起出血及溶血，此时会出现血常规的异常。建议到正规医院诊治，进一步检查以排除其他肝脏疾病。
乙肝病毒恶化后是不是就会形成肝癌吗	乙肝病毒携带者，如果肝功能正常，腹部彩超正常可以定期复查，不需要治疗，如果肝功能反复不正常，病毒复制明显的话，建议到正规医院进行规范的抗病毒治疗，及时的进行干预的话，不容易形成肝癌或者在早期发现时及时处理，如果符合抗病毒治疗指征，需要进行积极抗病毒治疗。
肝血管瘤增强ct表现？	肝海绵状血管瘤是最常见的肝良性肿瘤，一般肝血管瘤能通过增强CT检查出来，肝血管瘤在CT检测时病灶边缘呈现高密度强化，增强的区域是进行性向病灶中央发生扩大散，而且持续时间长，延迟扫描病灶呈等密度充填，等密度持续时间10—15分钟。呈圆形或卵圆形低密度，境界清楚，密度均匀。大的血管瘤，通常４cm以上，瘤灶中央可见更低密度区，呈裂隙状。要注意的是CT断层扫描间隙大，较小的血管瘤有可能看不到。最终诊断依靠病理。若怀疑此病建议到正规医院诊治。
一般cT就能看出是肝血管瘤吗	肝海绵状血管瘤是最常见的肝良性肿瘤，一般肝血管瘤能通过增强CT检查出来，肝血管瘤在CT检测时病灶边缘呈现高密度强化，增强的区域是进行性向病灶中央发生扩大散，而且持续时间长，延迟扫描病灶呈等密度充填，等密度持续时间10—15分钟。呈圆形或卵圆形低密度，境界清楚，密度均匀。大的血管瘤，通常４cm以上，瘤灶中央可见更低密度区，呈裂隙状。要注意的是CT断层扫描间隙大，较小的血管瘤有可能看不到。最终诊断依靠病理。若怀疑此病建议到正规医院诊治。
CT能检查出肝血管瘤吗？	肝海绵状血管瘤是最常见的肝良性肿瘤，一般肝血管瘤能通过增强CT检查出来，肝血管瘤在CT检测时病灶边缘呈现高密度强化，增强的区域是进行性向病灶中央发生扩大散，而且持续时间长，延迟扫描病灶呈等密度充填，等密度持续时间10—15分钟。呈圆形或卵圆形低密度，境界清楚，密度均匀。大的血管瘤，通常４cm以上，瘤灶中央可见更低密度区，呈裂隙状。要注意的是CT断层扫描间隙大，较小的血管瘤有可能看不到。最终诊断依靠病理。若怀疑此病建议到正规医院诊治。
肝脏增强CT能看出来肝是否有血管瘤吗	肝海绵状血管瘤是最常见的肝良性肿瘤，一般肝血管瘤能通过增强CT检查出来，肝血管瘤在CT检测时病灶边缘呈现高密度强化，增强的区域是进行性向病灶中央发生扩大散，而且持续时间长，延迟扫描病灶呈等密度充填，等密度持续时间10—15分钟。呈圆形或卵圆形低密度，境界清楚，密度均匀。大的血管瘤，通常４cm以上，瘤灶中央可见更低密度区，呈裂隙状。要注意的是CT断层扫描间隙大，较小的血管瘤有可能看不到。最终诊断依靠病理。若怀疑此病建议到正规医院诊治。
肝血管瘤要做ct增强吗？	肝海绵状血管瘤是最常见的肝良性肿瘤，一般肝血管瘤能通过增强CT检查出来，肝血管瘤在CT检测时病灶边缘呈现高密度强化，增强的区域是进行性向病灶中央发生扩大散，而且持续时间长，延迟扫描病灶呈等密度充填，等密度持续时间10—15分钟。呈圆形或卵圆形低密度，境界清楚，密度均匀。大的血管瘤，通常４cm以上，瘤灶中央可见更低密度区，呈裂隙状。要注意的是CT断层扫描间隙大，较小的血管瘤有可能看不到。最终诊断依靠病理。若怀疑此病建议到正规医院诊治。
肝海绵状血管瘤CT表现	肝海绵状血管瘤是最常见的肝良性肿瘤，一般肝血管瘤能通过增强CT检查出来，肝血管瘤在CT检测时病灶边缘呈现高密度强化，增强的区域是进行性向病灶中央发生扩大散，而且持续时间长，延迟扫描病灶呈等密度充填，等密度持续时间10—15分钟。呈圆形或卵圆形低密度，境界清楚，密度均匀。大的血管瘤，通常４cm以上，瘤灶中央可见更低密度区，呈裂隙状。要注意的是CT断层扫描间隙大，较小的血管瘤有可能看不到。最终诊断依靠病理。若怀疑此病建议到正规医院诊治。
肝血管瘤诊断必须要做加强CT吗	肝海绵状血管瘤是最常见的肝良性肿瘤，一般肝血管瘤能通过增强CT检查出来，肝血管瘤在CT检测时病灶边缘呈现高密度强化，增强的区域是进行性向病灶中央发生扩大散，而且持续时间长，延迟扫描病灶呈等密度充填，等密度持续时间10—15分钟。呈圆形或卵圆形低密度，境界清楚，密度均匀。大的血管瘤，通常４cm以上，瘤灶中央可见更低密度区，呈裂隙状。要注意的是CT断层扫描间隙大，较小的血管瘤有可能看不到。最终诊断依靠病理。若怀疑此病建议到正规医院诊治。
增强ct能确诊肝血管瘤吗	肝海绵状血管瘤是最常见的肝良性肿瘤，一般肝血管瘤能通过增强CT检查出来，肝血管瘤在CT检测时病灶边缘呈现高密度强化，增强的区域是进行性向病灶中央发生扩大散，而且持续时间长，延迟扫描病灶呈等密度充填，等密度持续时间10—15分钟。呈圆形或卵圆形低密度，境界清楚，密度均匀。大的血管瘤，通常４cm以上，瘤灶中央可见更低密度区，呈裂隙状。要注意的是CT断层扫描间隙大，较小的血管瘤有可能看不到。最终诊断依靠病理。若怀疑此病建议到正规医院诊治。
ct能确定肝血管瘤吗？	肝海绵状血管瘤是最常见的肝良性肿瘤，一般肝血管瘤能通过增强CT检查出来，肝血管瘤在CT检测时病灶边缘呈现高密度强化，增强的区域是进行性向病灶中央发生扩大散，而且持续时间长，延迟扫描病灶呈等密度充填，等密度持续时间10—15分钟。呈圆形或卵圆形低密度，境界清楚，密度均匀。大的血管瘤，通常４cm以上，瘤灶中央可见更低密度区，呈裂隙状。要注意的是CT断层扫描间隙大，较小的血管瘤有可能看不到。最终诊断依靠病理。若怀疑此病建议到正规医院诊治。
彩超检查考虑肝血管瘤增强ct没检查到,我这会不会是小肝癌	肝海绵状血管瘤是最常见的肝良性肿瘤，在超声下看到的血管瘤比较小，因彩超检查是实时检查，分辨间隙非常小，所以很小的异常回声超声都能看得到，但是定性不如CT，而CT断层扫描间隙大，较小的血管瘤有可能看不到。所以可能出现B超和CT检查结果不一致的情况，最终诊断依靠病理，若怀疑此病建议到正规医院诊治，进一步行MRI检查以明确诊断。
体检B超查到肝部血管瘤,复查做加强CT检查血管瘤消	肝海绵状血管瘤是最常见的肝良性肿瘤，在超声下看到的血管瘤比较小，因彩超检查是实时检查，分辨间隙非常小，所以很小的异常回声超声都能看得到，但是定性不如CT，而CT断层扫描间隙大，较小的血管瘤有可能看不到。所以可能出现B超和CT检查结果不一致的情况，最终诊断依靠病理，若怀疑此病建议到正规医院诊治，进一步行MRI检查以明确诊断。
肝血管瘤B超和CT检查结果不一致是怎么回事	肝海绵状血管瘤是最常见的肝良性肿瘤，在超声下看到的血管瘤比较小，因彩超检查是实时检查，分辨间隙非常小，所以很小的异常回声超声都能看得到，但是定性不如CT，而CT断层扫描间隙大，较小的血管瘤有可能看不到。所以可能出现B超和CT检查结果不一致的情况，最终诊断依靠病理，若怀疑此病建议到正规医院诊治，进一步行MRI检查以明确诊断。
肝脏中强回声血管瘤?	肝海绵状血管瘤是最常见的肝良性肿瘤，B超是最为常用的检查方法。典型的小血管瘤呈中等回声光团，密度均匀，界限清晰，形状规则。而海绵状血管瘤内部回声强弱不等，并有形态不规则、大小不等的无回声区，如有钙化灶可见强回声伴声影。怀疑此病建议到正规医院诊治，进一步行增强CT或MRI以明确诊断。MRI能检出＜1cm的肿瘤，呈“灯泡征”。一般根据病史，症状和体征，B超或增强CT、MRI、AFP检测等检查可以诊断本病。最终诊断依靠病理。
b超肝血管瘤能检查出来吗	肝海绵状血管瘤是最常见的肝良性肿瘤，B超是最为常用的检查方法。典型的小血管瘤呈中等回声光团，密度均匀，界限清晰，形状规则。而海绵状血管瘤内部回声强弱不等，并有形态不规则、大小不等的无回声区，如有钙化灶可见强回声伴声影。怀疑此病建议到正规医院诊治，进一步行增强CT或MRI以明确诊断。MRI能检出＜1cm的肿瘤，呈“灯泡征”。一般根据病史，症状和体征，B超或增强CT、MRI、AFP检测等检查可以诊断本病。最终诊断依靠病理。
肝内血管瘤高回声有丰富血流信号正常吗	肝海绵状血管瘤是最常见的肝良性肿瘤，B超是最为常用的检查方法。典型的小血管瘤呈中等回声光团，密度均匀，界限清晰，形状规则。而海绵状血管瘤内部回声强弱不等，并有形态不规则、大小不等的无回声区，如有钙化灶可见强回声伴声影。怀疑此病建议到正规医院诊治，进一步行增强CT或MRI以明确诊断。MRI能检出＜1cm的肿瘤，呈“灯泡征”。一般根据病史，症状和体征，B超或增强CT、MRI、AFP检测等检查可以诊断本病。最终诊断依靠病理。
肝内稍高回声血管瘤可能性有多大？	肝海绵状血管瘤是最常见的肝良性肿瘤，B超是最为常用的检查方法。典型的小血管瘤呈中等回声光团，密度均匀，界限清晰，形状规则。而海绵状血管瘤内部回声强弱不等，并有形态不规则、大小不等的无回声区，如有钙化灶可见强回声伴声影。怀疑此病建议到正规医院诊治，进一步行增强CT或MRI以明确诊断。MRI能检出＜1cm的肿瘤，呈“灯泡征”。一般根据病史，症状和体征，B超或增强CT、MRI、AFP检测等检查可以诊断本病。最终诊断依靠病理。
彩超查肝血管瘤准确吗？	肝海绵状血管瘤是最常见的肝良性肿瘤，B超是最为常用的检查方法。典型的小血管瘤呈中等回声光团，密度均匀，界限清晰，形状规则。而海绵状血管瘤内部回声强弱不等，并有形态不规则、大小不等的无回声区，如有钙化灶可见强回声伴声影。怀疑此病建议到正规医院诊治，进一步行增强CT或MRI以明确诊断。MRI能检出＜1cm的肿瘤，呈“灯泡征”。一般根据病史，症状和体征，B超或增强CT、MRI、AFP检测等检查可以诊断本病。最终诊断依靠病理。
肝脏内低回声是血管瘤吗？	肝海绵状血管瘤是最常见的肝良性肿瘤，B超是最为常用的检查方法。典型的小血管瘤呈中等回声光团，密度均匀，界限清晰，形状规则。而海绵状血管瘤内部回声强弱不等，并有形态不规则、大小不等的无回声区，如有钙化灶可见强回声伴声影。怀疑此病建议到正规医院诊治，进一步行增强CT或MRI以明确诊断。MRI能检出＜1cm的肿瘤，呈“灯泡征”。一般根据病史，症状和体征，B超或增强CT、MRI、AFP检测等检查可以诊断本病。最终诊断依靠病理。
做b超可以查出肝血管瘤吗？	肝海绵状血管瘤是最常见的肝良性肿瘤，B超是最为常用的检查方法。典型的小血管瘤呈中等回声光团，密度均匀，界限清晰，形状规则。而海绵状血管瘤内部回声强弱不等，并有形态不规则、大小不等的无回声区，如有钙化灶可见强回声伴声影。怀疑此病建议到正规医院诊治，进一步行增强CT或MRI以明确诊断。MRI能检出＜1cm的肿瘤，呈“灯泡征”。一般根据病史，症状和体征，B超或增强CT、MRI、AFP检测等检查可以诊断本病。最终诊断依靠病理。
彩超会看错肝血管瘤吗？	肝海绵状血管瘤是最常见的肝良性肿瘤，B超是最为常用的检查方法。典型的小血管瘤呈中等回声光团，密度均匀，界限清晰，形状规则。而海绵状血管瘤内部回声强弱不等，并有形态不规则、大小不等的无回声区，如有钙化灶可见强回声伴声影。怀疑此病建议到正规医院诊治，进一步行增强CT或MRI以明确诊断。MRI能检出＜1cm的肿瘤，呈“灯泡征”。一般根据病史，症状和体征，B超或增强CT、MRI、AFP检测等检查可以诊断本病。最终诊断依靠病理。
肝脏做B超，医生怀疑是血管瘤，血常规正常	肝海绵状血管瘤是最常见的肝良性肿瘤，B超是最为常用的检查方法。典型的小血管瘤呈中等回声光团，密度均匀，界限清晰，形状规则。而海绵状血管瘤内部回声强弱不等，并有形态不规则、大小不等的无回声区，如有钙化灶可见强回声伴声影。怀疑此病建议到正规医院诊治，进一步行增强CT或MRI以明确诊断。MRI能检出＜1cm的肿瘤，呈“灯泡征”。一般根据病史，症状和体征，B超或增强CT、MRI、AFP检测等检查可以诊断本病。最终诊断依靠病理。
肝血管瘤用B超可以检查吗？	肝海绵状血管瘤是最常见的肝良性肿瘤，B超是最为常用的检查方法。典型的小血管瘤呈中等回声光团，密度均匀，界限清晰，形状规则。而海绵状血管瘤内部回声强弱不等，并有形态不规则、大小不等的无回声区，如有钙化灶可见强回声伴声影。怀疑此病建议到正规医院诊治，进一步行增强CT或MRI以明确诊断。MRI能检出＜1cm的肿瘤，呈“灯泡征”。一般根据病史，症状和体征，B超或增强CT、MRI、AFP检测等检查可以诊断本病。最终诊断依靠病理。
B超是否能检查肝血管瘤	肝海绵状血管瘤是最常见的肝良性肿瘤，B超是最为常用的检查方法。典型的小血管瘤呈中等回声光团，密度均匀，界限清晰，形状规则。而海绵状血管瘤内部回声强弱不等，并有形态不规则、大小不等的无回声区，如有钙化灶可见强回声伴声影。怀疑此病建议到正规医院诊治，进一步行增强CT或MRI以明确诊断。MRI能检出＜1cm的肿瘤，呈“灯泡征”。一般根据病史，症状和体征，B超或增强CT、MRI、AFP检测等检查可以诊断本病。最终诊断依靠病理。
肝血管瘤有血流信号吗？	肝海绵状血管瘤是最常见的肝良性肿瘤，B超是最为常用的检查方法。典型的小血管瘤呈中等回声光团，密度均匀，界限清晰，形状规则。而海绵状血管瘤内部回声强弱不等，并有形态不规则、大小不等的无回声区，如有钙化灶可见强回声伴声影。怀疑此病建议到正规医院诊治，进一步行增强CT或MRI以明确诊断。MRI能检出＜1cm的肿瘤，呈“灯泡征”。一般根据病史，症状和体征，B超或增强CT、MRI、AFP检测等检查可以诊断本病。最终诊断依靠病理。
肝血管瘤内见血流信号正常吗	肝海绵状血管瘤是最常见的肝良性肿瘤，B超是最为常用的检查方法。典型的小血管瘤呈中等回声光团，密度均匀，界限清晰，形状规则。而海绵状血管瘤内部回声强弱不等，并有形态不规则、大小不等的无回声区，如有钙化灶可见强回声伴声影。怀疑此病建议到正规医院诊治，进一步行增强CT或MRI以明确诊断。MRI能检出＜1cm的肿瘤，呈“灯泡征”。一般根据病史，症状和体征，B超或增强CT、MRI、AFP检测等检查可以诊断本病。最终诊断依靠病理。
肝血管瘤做什么检查能确诊呢？	肝海绵状血管瘤是最常见的肝良性肿瘤，B超是最为常用的检查方法。典型的小血管瘤呈中等回声光团，密度均匀，界限清晰，形状规则。而海绵状血管瘤内部回声强弱不等，并有形态不规则、大小不等的无回声区，如有钙化灶可见强回声伴声影。怀疑此病建议到正规医院诊治，进一步行增强CT或MRI以明确诊断。MRI能检出＜1cm的肿瘤，呈“灯泡征”。一般根据病史，症状和体征，B超或增强CT、MRI、AFP检测等检查可以诊断本病。最终诊断依靠病理。
医生用什么仪器检查肝血管瘤好	肝海绵状血管瘤是最常见的肝良性肿瘤，B超是最为常用的检查方法。典型的小血管瘤呈中等回声光团，密度均匀，界限清晰，形状规则。而海绵状血管瘤内部回声强弱不等，并有形态不规则、大小不等的无回声区，如有钙化灶可见强回声伴声影。怀疑此病建议到正规医院诊治，进一步行增强CT或MRI以明确诊断。MRI能检出＜1cm的肿瘤，呈“灯泡征”。一般根据病史，症状和体征，B超或增强CT、MRI、AFP检测等检查可以诊断本病。最终诊断依靠病理。
B超上显示肝血管瘤能确诊吗	肝海绵状血管瘤是最常见的肝良性肿瘤，B超是最为常用的检查方法。典型的小血管瘤呈中等回声光团，密度均匀，界限清晰，形状规则。而海绵状血管瘤内部回声强弱不等，并有形态不规则、大小不等的无回声区，如有钙化灶可见强回声伴声影。怀疑此病建议到正规医院诊治，进一步行增强CT或MRI以明确诊断。MRI能检出＜1cm的肿瘤，呈“灯泡征”。一般根据病史，症状和体征，B超或增强CT、MRI、AFP检测等检查可以诊断本病。最终诊断依靠病理。
能否确诊为肝血管瘤，还应该做什么检查？	肝海绵状血管瘤是最常见的肝良性肿瘤，B超是最为常用的检查方法。典型的小血管瘤呈中等回声光团，密度均匀，界限清晰，形状规则。而海绵状血管瘤内部回声强弱不等，并有形态不规则、大小不等的无回声区，如有钙化灶可见强回声伴声影。怀疑此病建议到正规医院诊治，进一步行增强CT或MRI以明确诊断。MRI能检出＜1cm的肿瘤，呈“灯泡征”。一般根据病史，症状和体征，B超或增强CT、MRI、AFP检测等检查可以诊断本病。最终诊断依靠病理。
什么办法可以检查出是肝血管瘤？	肝海绵状血管瘤是最常见的肝良性肿瘤，B超是最为常用的检查方法。典型的小血管瘤呈中等回声光团，密度均匀，界限清晰，形状规则。而海绵状血管瘤内部回声强弱不等，并有形态不规则、大小不等的无回声区，如有钙化灶可见强回声伴声影。怀疑此病建议到正规医院诊治，进一步行增强CT或MRI以明确诊断。MRI能检出＜1cm的肿瘤，呈“灯泡征”。一般根据病史，症状和体征，B超或增强CT、MRI、AFP检测等检查可以诊断本病。最终诊断依靠病理。
需要确诊肝血管瘤是做加强ct好还是增强磁共振好啊？	肝海绵状血管瘤是最常见的肝良性肿瘤，B超是最为常用的检查方法。典型的小血管瘤呈中等回声光团，密度均匀，界限清晰，形状规则。而海绵状血管瘤内部回声强弱不等，并有形态不规则、大小不等的无回声区，如有钙化灶可见强回声伴声影。怀疑此病建议到正规医院诊治，进一步行增强CT或MRI以明确诊断。MRI能检出＜1cm的肿瘤，呈“灯泡征”。一般根据病史，症状和体征，B超或增强CT、MRI、AFP检测等检查可以诊断本病。最终诊断依靠病理。
肝血管瘤需要做什么检查	肝海绵状血管瘤是最常见的肝良性肿瘤，B超是最为常用的检查方法。典型的小血管瘤呈中等回声光团，密度均匀，界限清晰，形状规则。而海绵状血管瘤内部回声强弱不等，并有形态不规则、大小不等的无回声区，如有钙化灶可见强回声伴声影。怀疑此病建议到正规医院诊治，进一步行增强CT或MRI以明确诊断。MRI能检出＜1cm的肿瘤，呈“灯泡征”。一般根据病史，症状和体征，B超或增强CT、MRI、AFP检测等检查可以诊断本病。最终诊断依靠病理。
肝血管瘤做什么检查才能确诊？	肝海绵状血管瘤是最常见的肝良性肿瘤，B超是最为常用的检查方法。典型的小血管瘤呈中等回声光团，密度均匀，界限清晰，形状规则。而海绵状血管瘤内部回声强弱不等，并有形态不规则、大小不等的无回声区，如有钙化灶可见强回声伴声影。怀疑此病建议到正规医院诊治，进一步行增强CT或MRI以明确诊断。MRI能检出＜1cm的肿瘤，呈“灯泡征”。一般根据病史，症状和体征，B超或增强CT、MRI、AFP检测等检查可以诊断本病。最终诊断依靠病理。
b超能确诊肝血管瘤吗？	肝海绵状血管瘤是最常见的肝良性肿瘤，B超是最为常用的检查方法。典型的小血管瘤呈中等回声光团，密度均匀，界限清晰，形状规则。而海绵状血管瘤内部回声强弱不等，并有形态不规则、大小不等的无回声区，如有钙化灶可见强回声伴声影。怀疑此病建议到正规医院诊治，进一步行增强CT或MRI以明确诊断。MRI能检出＜1cm的肿瘤，呈“灯泡征”。一般根据病史，症状和体征，B超或增强CT、MRI、AFP检测等检查可以诊断本病。最终诊断依靠病理。
B超可以确诊肝血管瘤吗？	肝海绵状血管瘤是最常见的肝良性肿瘤，B超是最为常用的检查方法。典型的小血管瘤呈中等回声光团，密度均匀，界限清晰，形状规则。而海绵状血管瘤内部回声强弱不等，并有形态不规则、大小不等的无回声区，如有钙化灶可见强回声伴声影。怀疑此病建议到正规医院诊治，进一步行增强CT或MRI以明确诊断。MRI能检出＜1cm的肿瘤，呈“灯泡征”。一般根据病史，症状和体征，B超或增强CT、MRI、AFP检测等检查可以诊断本病。最终诊断依靠病理。
肝血管瘤边界显示不清是什麽意思	肝海绵状血管瘤是最常见的肝良性肿瘤，B超是最为常用的检查方法。典型的小血管瘤呈中等回声光团，密度均匀，界限清晰，形状规则。而海绵状血管瘤内部回声强弱不等，并有形态不规则、大小不等的无回声区，如有钙化灶可见强回声伴声影。B超检查时会出现血管瘤边界不清的情况，若怀疑此病建议到正规医院诊治，进一步行肝脏增强CT或MRI检查以明确诊断。最终诊断依靠病理。
肝血管瘤会边界不清吗？	肝海绵状血管瘤是最常见的肝良性肿瘤，B超是最为常用的检查方法。典型的小血管瘤呈中等回声光团，密度均匀，界限清晰，形状规则。而海绵状血管瘤内部回声强弱不等，并有形态不规则、大小不等的无回声区，如有钙化灶可见强回声伴声影。B超检查时会出现血管瘤边界不清的情况，若怀疑此病建议到正规医院诊治，进一步行肝脏增强CT或MRI检查以明确诊断。最终诊断依靠病理。
肝血管瘤边界不清什么意思？	肝海绵状血管瘤是最常见的肝良性肿瘤，B超是最为常用的检查方法。典型的小血管瘤呈中等回声光团，密度均匀，界限清晰，形状规则。而海绵状血管瘤内部回声强弱不等，并有形态不规则、大小不等的无回声区，如有钙化灶可见强回声伴声影。B超检查时会出现血管瘤边界不清的情况，若怀疑此病建议到正规医院诊治，进一步行肝脏增强CT或MRI检查以明确诊断。最终诊断依靠病理。
肝血管瘤手术前要做什么检查？	肝海绵状血管瘤是最常见的肝良性肿瘤，B超是最为常用的检查方法。若B超不能明确诊断，可以进一步做肝脏CT或核磁共振检查明确是否是肝血管瘤。最终诊断依靠术后病理。常规术前还需要做心电图、胸片，必要时心脏彩超等评估心肺功能。若诊断此病建议到正规医院诊治。
体检B超发现肝脏疑似血管瘤应如何复查？	肝海绵状血管瘤是最常见的肝良性肿瘤，小的无症状的肝血管瘤不需治疗，但应每隔3-6个月复查，动态观察肿瘤变化。若诊断此病建议到正规医院诊治，复查血常规、肝功能，肝脏B超，必要时行肝脏增强CT或MRI。
复查肝血管瘤要空腹吗？	肝血管瘤检查或复查一般需要检查血常规、肝功能，肝脏B超，增强CT或MRI等，应该空腹。建议发现肝血管瘤后到正规医院诊治。
肝血管瘤作B超检查时要空腹吗	肝血管瘤检查或复查一般需要检查血常规、肝功能，肝脏B超，增强CT或MRI等，应该空腹。建议发现肝血管瘤后到正规医院诊治。
肝血管瘤检查前要求空腹吗	肝血管瘤检查或复查一般需要检查血常规、肝功能，肝脏B超，增强CT或MRI等，应该空腹。建议发现肝血管瘤后到正规医院诊治。
肝血管瘤复查只做b超就可以吗?	肝血管瘤检查或复查一般需要检查血常规、肝功能，肝脏B超，增强CT或MRI等，应该空腹。建议发现肝血管瘤后到正规医院诊治。
肝血管瘤一般都有多大呢？	肝海绵状血管瘤是最常见的肝良性肿瘤，本病可单发，也可多发，左右肝叶均可发生，但以肝右叶多见。肿瘤大小不一，小者仅在显微镜下才能确诊，大者重达十余千克。若诊断此病建议到正规医院诊治。
肝血管瘤62*50mm的严重吗？	肝海绵状血管瘤是最常见的肝良性肿瘤，小的无症状的肝血管瘤不需治疗，但应每隔3-6个月做B超检查，动态观察肿瘤变化。直径大于10cm或有发生外伤性破裂大出血的可能或肿瘤虽小，但有明显症状或不能排除肝癌的肝血管瘤可行手术切除。手术治疗的指征为：①血管瘤直径＞10cm；②肿瘤直径为5-10cm，但位于肝脏边缘，有发生外伤性破裂大出血的可能；③肿瘤直径为 3-5cm，肿瘤虽小，但有明显症状，或不能排除肝癌。肝切除是治疗肝海绵状血管瘤最有效的方法，预后较好。若诊断此病建议到正规医院诊治。
肝血管瘤2cm严重吗？	肝海绵状血管瘤是最常见的肝良性肿瘤，小的无症状的肝血管瘤不需治疗，但应每隔3-6个月做B超检查，动态观察肿瘤变化。直径大于10cm或有发生外伤性破裂大出血的可能或肿瘤虽小，但有明显症状或不能排除肝癌的肝血管瘤可行手术切除。手术治疗的指征为：①血管瘤直径＞10cm；②肿瘤直径为5-10cm，但位于肝脏边缘，有发生外伤性破裂大出血的可能；③肿瘤直径为 3-5cm，肿瘤虽小，但有明显症状，或不能排除肝癌。肝切除是治疗肝海绵状血管瘤最有效的方法，预后较好。若诊断此病建议到正规医院诊治。
肝部血管瘤1cm要紧吗？	肝海绵状血管瘤是最常见的肝良性肿瘤，小的无症状的肝血管瘤不需治疗，但应每隔3-6个月做B超检查，动态观察肿瘤变化。直径大于10cm或有发生外伤性破裂大出血的可能或肿瘤虽小，但有明显症状或不能排除肝癌的肝血管瘤可行手术切除。手术治疗的指征为：①血管瘤直径＞10cm；②肿瘤直径为5-10cm，但位于肝脏边缘，有发生外伤性破裂大出血的可能；③肿瘤直径为 3-5cm，肿瘤虽小，但有明显症状，或不能排除肝癌。肝切除是治疗肝海绵状血管瘤最有效的方法，预后较好。若诊断此病建议到正规医院诊治。
肝血管瘤1cm严重吗	肝海绵状血管瘤是最常见的肝良性肿瘤，小的无症状的肝血管瘤不需治疗，但应每隔3-6个月做B超检查，动态观察肿瘤变化。直径大于10cm或有发生外伤性破裂大出血的可能或肿瘤虽小，但有明显症状或不能排除肝癌的肝血管瘤可行手术切除。手术治疗的指征为：①血管瘤直径＞10cm；②肿瘤直径为5-10cm，但位于肝脏边缘，有发生外伤性破裂大出血的可能；③肿瘤直径为 3-5cm，肿瘤虽小，但有明显症状，或不能排除肝癌。肝切除是治疗肝海绵状血管瘤最有效的方法，预后较好。若诊断此病建议到正规医院诊治。
肝血管瘤9公分怎么办？	肝海绵状血管瘤是最常见的肝良性肿瘤，小的无症状的肝血管瘤不需治疗，但应每隔3-6个月做B超检查，动态观察肿瘤变化。直径大于10cm或有发生外伤性破裂大出血的可能或肿瘤虽小，但有明显症状或不能排除肝癌的肝血管瘤可行手术切除。手术治疗的指征为：①血管瘤直径＞10cm；②肿瘤直径为5-10cm，但位于肝脏边缘，有发生外伤性破裂大出血的可能；③肿瘤直径为 3-5cm，肿瘤虽小，但有明显症状，或不能排除肝癌。肝切除是治疗肝海绵状血管瘤最有效的方法，预后较好。若诊断此病建议到正规医院诊治。
肝血管瘤6.5大不大？	肝海绵状血管瘤是最常见的肝良性肿瘤，小的无症状的肝血管瘤不需治疗，但应每隔3-6个月做B超检查，动态观察肿瘤变化。直径大于10cm或有发生外伤性破裂大出血的可能或肿瘤虽小，但有明显症状或不能排除肝癌的肝血管瘤可行手术切除。手术治疗的指征为：①血管瘤直径＞10cm；②肿瘤直径为5-10cm，但位于肝脏边缘，有发生外伤性破裂大出血的可能；③肿瘤直径为 3-5cm，肿瘤虽小，但有明显症状，或不能排除肝癌。肝切除是治疗肝海绵状血管瘤最有效的方法，预后较好。若诊断此病建议到正规医院诊治。
肝血管瘤7公分怎么办？	肝海绵状血管瘤是最常见的肝良性肿瘤，小的无症状的肝血管瘤不需治疗，但应每隔3-6个月做B超检查，动态观察肿瘤变化。直径大于10cm或有发生外伤性破裂大出血的可能或肿瘤虽小，但有明显症状或不能排除肝癌的肝血管瘤可行手术切除。手术治疗的指征为：①血管瘤直径＞10cm；②肿瘤直径为5-10cm，但位于肝脏边缘，有发生外伤性破裂大出血的可能；③肿瘤直径为 3-5cm，肿瘤虽小，但有明显症状，或不能排除肝癌。肝切除是治疗肝海绵状血管瘤最有效的方法，预后较好。若诊断此病建议到正规医院诊治。
12*9mm的肝血管瘤要怎么处理？	肝海绵状血管瘤是最常见的肝良性肿瘤，小的无症状的肝血管瘤不需治疗，但应每隔3-6个月做B超检查，动态观察肿瘤变化。直径大于10cm或有发生外伤性破裂大出血的可能或肿瘤虽小，但有明显症状或不能排除肝癌的肝血管瘤可行手术切除。手术治疗的指征为：①血管瘤直径＞10cm；②肿瘤直径为5-10cm，但位于肝脏边缘，有发生外伤性破裂大出血的可能；③肿瘤直径为 3-5cm，肿瘤虽小，但有明显症状，或不能排除肝癌。肝切除是治疗肝海绵状血管瘤最有效的方法，预后较好。若诊断此病建议到正规医院诊治。
大于10公分的肝血管瘤最好的治疗方法是什么	肝海绵状血管瘤是最常见的肝良性肿瘤，小的无症状的肝血管瘤不需治疗，但应每隔3-6个月做B超检查，动态观察肿瘤变化。直径大于10cm或有发生外伤性破裂大出血的可能或肿瘤虽小，但有明显症状或不能排除肝癌的肝血管瘤可行手术切除。手术治疗的指征为：①血管瘤直径＞10cm；②肿瘤直径为5-10cm，但位于肝脏边缘，有发生外伤性破裂大出血的可能；③肿瘤直径为 3-5cm，肿瘤虽小，但有明显症状，或不能排除肝癌。肝切除是治疗肝海绵状血管瘤最有效的方法，预后较好。若诊断此病建议到正规医院诊治。
我肝右后叶查有一8mm小血管瘤要紧吗	肝海绵状血管瘤是最常见的肝良性肿瘤，小的无症状的肝血管瘤不需治疗，但应每隔3-6个月做B超检查，动态观察肿瘤变化。直径大于10cm或有发生外伤性破裂大出血的可能或肿瘤虽小，但有明显症状或不能排除肝癌的肝血管瘤可行手术切除。手术治疗的指征为：①血管瘤直径＞10cm；②肿瘤直径为5-10cm，但位于肝脏边缘，有发生外伤性破裂大出血的可能；③肿瘤直径为 3-5cm，肿瘤虽小，但有明显症状，或不能排除肝癌。肝切除是治疗肝海绵状血管瘤最有效的方法，预后较好。若诊断此病建议到正规医院诊治。
我肝右后叶查有一8mm小血管瘤要紧吗	肝海绵状血管瘤是最常见的肝良性肿瘤，小的无症状的肝血管瘤不需治疗，但应每隔3-6个月做B超检查，动态观察肿瘤变化。直径大于10cm或有发生外伤性破裂大出血的可能或肿瘤虽小，但有明显症状或不能排除肝癌的肝血管瘤可行手术切除。手术治疗的指征为：①血管瘤直径＞10cm；②肿瘤直径为5-10cm，但位于肝脏边缘，有发生外伤性破裂大出血的可能；③肿瘤直径为 3-5cm，肿瘤虽小，但有明显症状，或不能排除肝癌。肝切除是治疗肝海绵状血管瘤最有效的方法，预后较好。若诊断此病建议到正规医院诊治。
我做了彩超，发现肝脏上有个1公分大的血管瘤.我该咋办？	肝海绵状血管瘤是最常见的肝良性肿瘤，小的无症状的肝血管瘤不需治疗，但应每隔3-6个月做B超检查，动态观察肿瘤变化。直径大于10cm或有发生外伤性破裂大出血的可能或肿瘤虽小，但有明显症状或不能排除肝癌的肝血管瘤可行手术切除。手术治疗的指征为：①血管瘤直径＞10cm；②肿瘤直径为5-10cm，但位于肝脏边缘，有发生外伤性破裂大出血的可能；③肿瘤直径为 3-5cm，肿瘤虽小，但有明显症状，或不能排除肝癌。肝切除是治疗肝海绵状血管瘤最有效的方法，预后较好。若诊断此病建议到正规医院诊治。
我今天做B超查出是肝血管瘤最大的2公分，需不需要手术？	肝海绵状血管瘤是最常见的肝良性肿瘤，小的无症状的肝血管瘤不需治疗，但应每隔3-6个月做B超检查，动态观察肿瘤变化。直径大于10cm或有发生外伤性破裂大出血的可能或肿瘤虽小，但有明显症状或不能排除肝癌的肝血管瘤可行手术切除。手术治疗的指征为：①血管瘤直径＞10cm；②肿瘤直径为5-10cm，但位于肝脏边缘，有发生外伤性破裂大出血的可能；③肿瘤直径为 3-5cm，肿瘤虽小，但有明显症状，或不能排除肝癌。肝切除是治疗肝海绵状血管瘤最有效的方法，预后较好。若诊断此病建议到正规医院诊治。
肝脏有1公分血管瘤？	肝海绵状血管瘤是最常见的肝良性肿瘤，小的无症状的肝血管瘤不需治疗，但应每隔3-6个月做B超检查，动态观察肿瘤变化。直径大于10cm或有发生外伤性破裂大出血的可能或肿瘤虽小，但有明显症状或不能排除肝癌的肝血管瘤可行手术切除。手术治疗的指征为：①血管瘤直径＞10cm；②肿瘤直径为5-10cm，但位于肝脏边缘，有发生外伤性破裂大出血的可能；③肿瘤直径为 3-5cm，肿瘤虽小，但有明显症状，或不能排除肝癌。肝切除是治疗肝海绵状血管瘤最有效的方法，预后较好。若诊断此病建议到正规医院诊治。
肝脏多发血管瘤大小10厘米左右	肝海绵状血管瘤是最常见的肝良性肿瘤，小的无症状的肝血管瘤不需治疗，但应每隔3-6个月做B超检查，动态观察肿瘤变化。直径大于10cm或有发生外伤性破裂大出血的可能或肿瘤虽小，但有明显症状或不能排除肝癌的肝血管瘤可行手术切除。手术治疗的指征为：①血管瘤直径＞10cm；②肿瘤直径为5-10cm，但位于肝脏边缘，有发生外伤性破裂大出血的可能；③肿瘤直径为 3-5cm，肿瘤虽小，但有明显症状，或不能排除肝癌。肝切除是治疗肝海绵状血管瘤最有效的方法，预后较好。若诊断此病建议到正规医院诊治。
肝脏有血管瘤要不要紧有2公分那么大	肝海绵状血管瘤是最常见的肝良性肿瘤，小的无症状的肝血管瘤不需治疗，但应每隔3-6个月做B超检查，动态观察肿瘤变化。直径大于10cm或有发生外伤性破裂大出血的可能或肿瘤虽小，但有明显症状或不能排除肝癌的肝血管瘤可行手术切除。手术治疗的指征为：①血管瘤直径＞10cm；②肿瘤直径为5-10cm，但位于肝脏边缘，有发生外伤性破裂大出血的可能；③肿瘤直径为 3-5cm，肿瘤虽小，但有明显症状，或不能排除肝癌。肝切除是治疗肝海绵状血管瘤最有效的方法，预后较好。若诊断此病建议到正规医院诊治。
肝脏血管瘤3*4厘米有危险吗	肝海绵状血管瘤是最常见的肝良性肿瘤，小的无症状的肝血管瘤不需治疗，但应每隔3-6个月做B超检查，动态观察肿瘤变化。直径大于10cm或有发生外伤性破裂大出血的可能或肿瘤虽小，但有明显症状或不能排除肝癌的肝血管瘤可行手术切除。手术治疗的指征为：①血管瘤直径＞10cm；②肿瘤直径为5-10cm，但位于肝脏边缘，有发生外伤性破裂大出血的可能；③肿瘤直径为 3-5cm，肿瘤虽小，但有明显症状，或不能排除肝癌。肝切除是治疗肝海绵状血管瘤最有效的方法，预后较好。若诊断此病建议到正规医院诊治。
肝脏血管瘤7.4厘米怎么治疗好	肝海绵状血管瘤是最常见的肝良性肿瘤，小的无症状的肝血管瘤不需治疗，但应每隔3-6个月做B超检查，动态观察肿瘤变化。直径大于10cm或有发生外伤性破裂大出血的可能或肿瘤虽小，但有明显症状或不能排除肝癌的肝血管瘤可行手术切除。手术治疗的指征为：①血管瘤直径＞10cm；②肿瘤直径为5-10cm，但位于肝脏边缘，有发生外伤性破裂大出血的可能；③肿瘤直径为 3-5cm，肿瘤虽小，但有明显症状，或不能排除肝癌。肝切除是治疗肝海绵状血管瘤最有效的方法，预后较好。若诊断此病建议到正规医院诊治。
肝血管瘤5公分左右，怎么办	肝海绵状血管瘤是最常见的肝良性肿瘤，小的无症状的肝血管瘤不需治疗，但应每隔3-6个月做B超检查，动态观察肿瘤变化。直径大于10cm或有发生外伤性破裂大出血的可能或肿瘤虽小，但有明显症状或不能排除肝癌的肝血管瘤可行手术切除。手术治疗的指征为：①血管瘤直径＞10cm；②肿瘤直径为5-10cm，但位于肝脏边缘，有发生外伤性破裂大出血的可能；③肿瘤直径为 3-5cm，肿瘤虽小，但有明显症状，或不能排除肝癌。肝切除是治疗肝海绵状血管瘤最有效的方法，预后较好。若诊断此病建议到正规医院诊治。
肝血管瘤三公分严重吗？	肝海绵状血管瘤是最常见的肝良性肿瘤，小的无症状的肝血管瘤不需治疗，但应每隔3-6个月做B超检查，动态观察肿瘤变化。直径大于10cm或有发生外伤性破裂大出血的可能或肿瘤虽小，但有明显症状或不能排除肝癌的肝血管瘤可行手术切除。手术治疗的指征为：①血管瘤直径＞10cm；②肿瘤直径为5-10cm，但位于肝脏边缘，有发生外伤性破裂大出血的可能；③肿瘤直径为 3-5cm，肿瘤虽小，但有明显症状，或不能排除肝癌。肝切除是治疗肝海绵状血管瘤最有效的方法，预后较好。若诊断此病建议到正规医院诊治。
肝血管瘤1cm算严重吗？	肝海绵状血管瘤是最常见的肝良性肿瘤，小的无症状的肝血管瘤不需治疗，但应每隔3-6个月做B超检查，动态观察肿瘤变化。直径大于10cm或有发生外伤性破裂大出血的可能或肿瘤虽小，但有明显症状或不能排除肝癌的肝血管瘤可行手术切除。手术治疗的指征为：①血管瘤直径＞10cm；②肿瘤直径为5-10cm，但位于肝脏边缘，有发生外伤性破裂大出血的可能；③肿瘤直径为 3-5cm，肿瘤虽小，但有明显症状，或不能排除肝癌。肝切除是治疗肝海绵状血管瘤最有效的方法，预后较好。若诊断此病建议到正规医院诊治。
肝血管瘤6公分严重吗？	肝海绵状血管瘤是最常见的肝良性肿瘤，小的无症状的肝血管瘤不需治疗，但应每隔3-6个月做B超检查，动态观察肿瘤变化。直径大于10cm或有发生外伤性破裂大出血的可能或肿瘤虽小，但有明显症状或不能排除肝癌的肝血管瘤可行手术切除。手术治疗的指征为：①血管瘤直径＞10cm；②肿瘤直径为5-10cm，但位于肝脏边缘，有发生外伤性破裂大出血的可能；③肿瘤直径为 3-5cm，肿瘤虽小，但有明显症状，或不能排除肝癌。肝切除是治疗肝海绵状血管瘤最有效的方法，预后较好。若诊断此病建议到正规医院诊治。
肝血管瘤3公分严重吗？	肝海绵状血管瘤是最常见的肝良性肿瘤，小的无症状的肝血管瘤不需治疗，但应每隔3-6个月做B超检查，动态观察肿瘤变化。直径大于10cm或有发生外伤性破裂大出血的可能或肿瘤虽小，但有明显症状或不能排除肝癌的肝血管瘤可行手术切除。手术治疗的指征为：①血管瘤直径＞10cm；②肿瘤直径为5-10cm，但位于肝脏边缘，有发生外伤性破裂大出血的可能；③肿瘤直径为 3-5cm，肿瘤虽小，但有明显症状，或不能排除肝癌。肝切除是治疗肝海绵状血管瘤最有效的方法，预后较好。若诊断此病建议到正规医院诊治。
肝血管瘤3厘米严重吗？	肝海绵状血管瘤是最常见的肝良性肿瘤，小的无症状的肝血管瘤不需治疗，但应每隔3-6个月做B超检查，动态观察肿瘤变化。直径大于10cm或有发生外伤性破裂大出血的可能或肿瘤虽小，但有明显症状或不能排除肝癌的肝血管瘤可行手术切除。手术治疗的指征为：①血管瘤直径＞10cm；②肿瘤直径为5-10cm，但位于肝脏边缘，有发生外伤性破裂大出血的可能；③肿瘤直径为 3-5cm，肿瘤虽小，但有明显症状，或不能排除肝癌。肝切除是治疗肝海绵状血管瘤最有效的方法，预后较好。若诊断此病建议到正规医院诊治。
肝血管瘤7公分严重吗？	肝海绵状血管瘤是最常见的肝良性肿瘤，小的无症状的肝血管瘤不需治疗，但应每隔3-6个月做B超检查，动态观察肿瘤变化。直径大于10cm或有发生外伤性破裂大出血的可能或肿瘤虽小，但有明显症状或不能排除肝癌的肝血管瘤可行手术切除。手术治疗的指征为：①血管瘤直径＞10cm；②肿瘤直径为5-10cm，但位于肝脏边缘，有发生外伤性破裂大出血的可能；③肿瘤直径为 3-5cm，肿瘤虽小，但有明显症状，或不能排除肝癌。肝切除是治疗肝海绵状血管瘤最有效的方法，预后较好。若诊断此病建议到正规医院诊治。
肝血管瘤5公分严重吗？	肝海绵状血管瘤是最常见的肝良性肿瘤，小的无症状的肝血管瘤不需治疗，但应每隔3-6个月做B超检查，动态观察肿瘤变化。直径大于10cm或有发生外伤性破裂大出血的可能或肿瘤虽小，但有明显症状或不能排除肝癌的肝血管瘤可行手术切除。手术治疗的指征为：①血管瘤直径＞10cm；②肿瘤直径为5-10cm，但位于肝脏边缘，有发生外伤性破裂大出血的可能；③肿瘤直径为 3-5cm，肿瘤虽小，但有明显症状，或不能排除肝癌。肝切除是治疗肝海绵状血管瘤最有效的方法，预后较好。若诊断此病建议到正规医院诊治。
肝血管瘤两厘米严重吗？	肝海绵状血管瘤是最常见的肝良性肿瘤，小的无症状的肝血管瘤不需治疗，但应每隔3-6个月做B超检查，动态观察肿瘤变化。直径大于10cm或有发生外伤性破裂大出血的可能或肿瘤虽小，但有明显症状或不能排除肝癌的肝血管瘤可行手术切除。手术治疗的指征为：①血管瘤直径＞10cm；②肿瘤直径为5-10cm，但位于肝脏边缘，有发生外伤性破裂大出血的可能；③肿瘤直径为 3-5cm，肿瘤虽小，但有明显症状，或不能排除肝癌。肝切除是治疗肝海绵状血管瘤最有效的方法，预后较好。若诊断此病建议到正规医院诊治。
肝右叶血管瘤大小约10X10mm需要怎么治疗严重不	肝海绵状血管瘤是最常见的肝良性肿瘤，小的无症状的肝血管瘤不需治疗，但应每隔3-6个月做B超检查，动态观察肿瘤变化。直径大于10cm或有发生外伤性破裂大出血的可能或肿瘤虽小，但有明显症状或不能排除肝癌的肝血管瘤可行手术切除。手术治疗的指征为：①血管瘤直径＞10cm；②肿瘤直径为5-10cm，但位于肝脏边缘，有发生外伤性破裂大出血的可能；③肿瘤直径为 3-5cm，肿瘤虽小，但有明显症状，或不能排除肝癌。肝切除是治疗肝海绵状血管瘤最有效的方法，预后较好。若诊断此病建议到正规医院诊治。
肝内血管瘤12×8毫米是什么意思	肝海绵状血管瘤是最常见的肝良性肿瘤，小的无症状的肝血管瘤不需治疗，但应每隔3-6个月做B超检查，动态观察肿瘤变化。直径大于10cm或有发生外伤性破裂大出血的可能或肿瘤虽小，但有明显症状或不能排除肝癌的肝血管瘤可行手术切除。手术治疗的指征为：①血管瘤直径＞10cm；②肿瘤直径为5-10cm，但位于肝脏边缘，有发生外伤性破裂大出血的可能；③肿瘤直径为 3-5cm，肿瘤虽小，但有明显症状，或不能排除肝癌。肝切除是治疗肝海绵状血管瘤最有效的方法，预后较好。若诊断此病建议到正规医院诊治。
肝血管瘤有4厘米，在这个病史里算是大还是小	肝海绵状血管瘤是最常见的肝良性肿瘤，小的无症状的肝血管瘤不需治疗，但应每隔3-6个月做B超检查，动态观察肿瘤变化。直径大于10cm或有发生外伤性破裂大出血的可能或肿瘤虽小，但有明显症状或不能排除肝癌的肝血管瘤可行手术切除。手术治疗的指征为：①血管瘤直径＞10cm；②肿瘤直径为5-10cm，但位于肝脏边缘，有发生外伤性破裂大出血的可能；③肿瘤直径为 3-5cm，肿瘤虽小，但有明显症状，或不能排除肝癌。肝切除是治疗肝海绵状血管瘤最有效的方法，预后较好。若诊断此病建议到正规医院诊治。
肝血管瘤有1公分情况到底严重吗	肝海绵状血管瘤是最常见的肝良性肿瘤，小的无症状的肝血管瘤不需治疗，但应每隔3-6个月做B超检查，动态观察肿瘤变化。直径大于10cm或有发生外伤性破裂大出血的可能或肿瘤虽小，但有明显症状或不能排除肝癌的肝血管瘤可行手术切除。手术治疗的指征为：①血管瘤直径＞10cm；②肿瘤直径为5-10cm，但位于肝脏边缘，有发生外伤性破裂大出血的可能；③肿瘤直径为 3-5cm，肿瘤虽小，但有明显症状，或不能排除肝癌。肝切除是治疗肝海绵状血管瘤最有效的方法，预后较好。若诊断此病建议到正规医院诊治。
肝血管瘤体检出有8厘米多了	肝海绵状血管瘤是最常见的肝良性肿瘤，小的无症状的肝血管瘤不需治疗，但应每隔3-6个月做B超检查，动态观察肿瘤变化。直径大于10cm或有发生外伤性破裂大出血的可能或肿瘤虽小，但有明显症状或不能排除肝癌的肝血管瘤可行手术切除。手术治疗的指征为：①血管瘤直径＞10cm；②肿瘤直径为5-10cm，但位于肝脏边缘，有发生外伤性破裂大出血的可能；③肿瘤直径为 3-5cm，肿瘤虽小，但有明显症状，或不能排除肝癌。肝切除是治疗肝海绵状血管瘤最有效的方法，预后较好。若诊断此病建议到正规医院诊治。
体检得知肝血管瘤大约18*16mm，这样需要手术吗	肝海绵状血管瘤是最常见的肝良性肿瘤，小的无症状的肝血管瘤不需治疗，但应每隔3-6个月做B超检查，动态观察肿瘤变化。直径大于10cm或有发生外伤性破裂大出血的可能或肿瘤虽小，但有明显症状或不能排除肝癌的肝血管瘤可行手术切除。手术治疗的指征为：①血管瘤直径＞10cm；②肿瘤直径为5-10cm，但位于肝脏边缘，有发生外伤性破裂大出血的可能；③肿瘤直径为 3-5cm，肿瘤虽小，但有明显症状，或不能排除肝癌。肝切除是治疗肝海绵状血管瘤最有效的方法，预后较好。若诊断此病建议到正规医院诊治。
B超结果显示肝右叶结节，考虑血管瘤是什么？	肝海绵状血管瘤是最常见的肝良性肿瘤，多认为起源于肝内的胚胎性血管错构芽，由于某种因素作用，如服用类固醇激素、避孕药以及妇女怀孕等，引起肿瘤样增生而形成。若诊断此病建议到正规医院诊治。
肝右叶占位性病变，海绵状血管瘤可能性	肝海绵状血管瘤是最常见的肝良性肿瘤，多认为起源于肝内的胚胎性血管错构芽，由于某种因素作用，如服用类固醇激素、避孕药以及妇女怀孕等，引起肿瘤样增生而形成。若诊断此病建议到正规医院诊治。
今天去体检说我肝右叶血管瘤可能12×11mm，是什么疾病	肝海绵状血管瘤是最常见的肝良性肿瘤，多认为起源于肝内的胚胎性血管错构芽，由于某种因素作用，如服用类固醇激素、避孕药以及妇女怀孕等，引起肿瘤样增生而形成。若诊断此病建议到正规医院诊治。
肝脏血管瘤是什么病	肝海绵状血管瘤是最常见的肝良性肿瘤，多认为起源于肝内的胚胎性血管错构芽，由于某种因素作用，如服用类固醇激素、避孕药以及妇女怀孕等，引起肿瘤样增生而形成。若诊断此病建议到正规医院诊治。
肝血管瘤是怎么回事	肝海绵状血管瘤是最常见的肝良性肿瘤，多认为起源于肝内的胚胎性血管错构芽，由于某种因素作用，如服用类固醇激素、避孕药以及妇女怀孕等，引起肿瘤样增生而形成。若诊断此病建议到正规医院诊治。
小孩去年体检发现肝上有个血管瘤6mm×7mm	肝海绵状血管瘤是最常见的肝良性肿瘤，小的无症状的肝血管瘤不需治疗，但应每隔3-6个月做B超检查，动态观察肿瘤变化。直径大于10cm或有发生外伤性破裂大出血的可能或肿瘤虽小，但有明显症状或不能排除肝癌的肝血管瘤可行手术切除。手术治疗的指征为：①血管瘤直径＞10cm；②肿瘤直径为5-10cm，但位于肝脏边缘，有发生外伤性破裂大出血的可能；③肿瘤直径为 3-5cm，肿瘤虽小，但有明显症状，或不能排除肝癌。肝切除是治疗肝海绵状血管瘤最有效的方法，预后较好。肝海绵状血管瘤最危险的并发症是血管瘤自发性破裂，且在婴幼儿较多见。因此，对新生儿肝海绵状血管瘤确诊后，应尽早手术治疗。若诊断此病建议到正规医院诊治。
B超检查出肝上有血管瘤要不要紧	肝海绵状血管瘤是最常见的肝良性肿瘤，小的无症状的肝血管瘤不需治疗，但应每隔3-6个月做B超检查，动态观察肿瘤变化。直径大于10cm或有发生外伤性破裂大出血的可能或肿瘤虽小，但有明显症状或不能排除肝癌的肝血管瘤可行手术切除。本病发展较慢，预后良好。若诊断此病建议到正规医院诊治。
我体检发现肝右叶血管瘤怎么治疗	肝海绵状血管瘤是最常见的肝良性肿瘤，小的无症状的肝血管瘤不需治疗，但应每隔3-6个月做B超检查，动态观察肿瘤变化。直径大于10cm或有发生外伤性破裂大出血的可能或肿瘤虽小，但有明显症状或不能排除肝癌的肝血管瘤可行手术切除。本病发展较慢，预后良好。若诊断此病建议到正规医院诊治。
为什么在肝脏上长了血管瘤不需要治疗？	肝海绵状血管瘤是最常见的肝良性肿瘤，小的无症状的肝血管瘤不需治疗，但应每隔3-6个月做B超检查，动态观察肿瘤变化。直径大于10cm或有发生外伤性破裂大出血的可能或肿瘤虽小，但有明显症状或不能排除肝癌的肝血管瘤可行手术切除。本病发展较慢，预后良好。若诊断此病建议到正规医院诊治。
肝上有血管瘤怎么办	肝海绵状血管瘤是最常见的肝良性肿瘤，小的无症状的肝血管瘤不需治疗，但应每隔3-6个月做B超检查，动态观察肿瘤变化。直径大于10cm或有发生外伤性破裂大出血的可能或肿瘤虽小，但有明显症状或不能排除肝癌的肝血管瘤可行手术切除。本病发展较慢，预后良好。若诊断此病建议到正规医院诊治。
体检是怀疑是肝血管瘤，严重吗？	肝海绵状血管瘤是最常见的肝良性肿瘤，小的无症状的肝血管瘤不需治疗，但应每隔3-6个月做B超检查，动态观察肿瘤变化。直径大于10cm或有发生外伤性破裂大出血的可能或肿瘤虽小，但有明显症状或不能排除肝癌的肝血管瘤可行手术切除。本病发展较慢，预后良好。若诊断此病建议到正规医院诊治。
肝右叶偏强回声结节，怀疑是血管瘤。请问该怎么治	肝海绵状血管瘤是最常见的肝良性肿瘤，小的无症状的肝血管瘤不需治疗，但应每隔3-6个月做B超检查，动态观察肿瘤变化。直径大于10cm或有发生外伤性破裂大出血的可能或肿瘤虽小，但有明显症状或不能排除肝癌的肝血管瘤可行手术切除。本病发展较慢，预后良好。若诊断此病建议到正规医院诊治。
彩超检查肝上有血管瘤，这个需要马上手术吗	肝海绵状血管瘤是最常见的肝良性肿瘤，小的无症状的肝血管瘤不需治疗，但应每隔3-6个月做B超检查，动态观察肿瘤变化。直径大于10cm或有发生外伤性破裂大出血的可能或肿瘤虽小，但有明显症状或不能排除肝癌的肝血管瘤可行手术切除。本病发展较慢，预后良好。若诊断此病建议到正规医院诊治。
肝脏上查出，有一个很小的血管瘤，应该怎么办	肝海绵状血管瘤是最常见的肝良性肿瘤，小的无症状的肝血管瘤不需治疗，但应每隔3-6个月做B超检查，动态观察肿瘤变化。直径大于10cm或有发生外伤性破裂大出血的可能或肿瘤虽小，但有明显症状或不能排除肝癌的肝血管瘤可行手术切除。本病发展较慢，预后良好。若诊断此病建议到正规医院诊治。
肝血管瘤越来越大，应该怎么办？	肝海绵状血管瘤是最常见的肝良性肿瘤，小的无症状的肝血管瘤不需治疗，但应每隔3-6个月做B超检查，动态观察肿瘤变化。直径大于10cm或有发生外伤性破裂大出血的可能或肿瘤虽小，但有明显症状或不能排除肝癌的肝血管瘤可行手术切除。本病发展较慢，预后良好。若诊断此病建议到正规医院诊治。
做彩超检查出肝血管瘤严重吗	肝海绵状血管瘤是最常见的肝良性肿瘤，小的无症状的肝血管瘤不需治疗，但应每隔3-6个月做B超检查，动态观察肿瘤变化。直径大于10cm或有发生外伤性破裂大出血的可能或肿瘤虽小，但有明显症状或不能排除肝癌的肝血管瘤可行手术切除。本病发展较慢，预后良好。若诊断此病建议到正规医院诊治。
我得了肝血管瘤可以治愈吗？	肝海绵状血管瘤是最常见的肝良性肿瘤，一般不会自动消失，小的无症状的肝血管瘤不需治疗，但应每隔3-6个月做B超检查，动态观察肿瘤变化。直径大于10cm或有发生外伤性破裂大出血的可能或肿瘤虽小，但有明显症状或不能排除肝癌的肝血管瘤可行手术切除。本病发展较慢，预后良好。肝切除是治疗肝海绵状血管瘤最有效的方法，切除术后复发较为常见，主要原因是肿瘤为多发性或术中切除未尽。复发后可再手术或放射治疗或局部注射硬化治疗。若诊断此病建议到正规医院诊治。
肝上长瘤子怎么回事	建议到正规医院就诊，首先明确肿瘤是良性的还是恶性的。肝脏良性肿瘤中血管瘤最为常见。而恶性肿瘤中肝癌最多。完善血常规、AFP、肝功能、B超、CT或MRI检查，确定治疗方案，手术是目前治疗肿瘤常用的方法之一。
肝癌CT增强报告及症状是肝癌吗？	肝癌是起源于上皮组织的原发性肝恶性肿瘤，一般情况通过病史、症状和体征、AFP和增强CT可以确诊。CT可以反映肝脏的病理形态表现，如病灶的大小形态，部位，数目以及病灶内有无出血坏死，钙化等。从病处的边缘情况可了解其侵袭性，如病灶边缘光滑清晰，特别是显示包膜的，表明肿瘤生长相对侵袭性小；若肿瘤边界模糊不清，表明肿瘤有较高的侵袭性，易侵犯血管，或在门静脉内形成癌栓。若诊断此病建议到正规医院诊治。最终诊断依靠病理。
肝增强ct不是很明显能确诊是肝癌吗	CT对肝癌诊断的符合率达90%以上，可检出1.0cm左右的微小肝癌，当肝癌直径过小时可能平面没有扫描到的情况，若怀疑诊断建议到正规医院进一步行MRI检查以明确诊断，最终诊断依靠病理。
小肝癌与肝囊肿的B超诊断区别是什么？	小肝癌在B超上一般提示为低回声结节，结节中可以见到少量的血流信号，而肝囊肿一般里面含有囊液，在B超下提示低回声或者无回声结节，没有明显的血流信号。还可以考虑查腹部CT或者是磁共振以进一步明确，最终诊断依靠病理。若发现此病建议到正规医院诊治。
小肝癌与肝囊肿的B超诊断区别是什么？	小肝癌在B超上一般提示为低回声结节，结节中可以见到少量的血流信号，而肝囊肿一般里面含有囊液，在B超下提示低回声或者无回声结节，没有明显的血流信号。还可以考虑查腹部CT或者是磁共振以进一步明确，最终诊断依靠病理。若发现此病建议到正规医院诊治。
你好。肝内多发占位性病变是肝癌吗？	肝占位性病变根据性质不同可分为恶性占位病变和良性占位病变。肝恶性占位病变主要包括肝癌、肝肉瘤等，其中常见的是肝癌。肝良性占位病变远比恶性占位病变少见，约占原发肝占位病变的5％-10％，主要包括肝囊肿，局灶性节结性增生，肝血管瘤，肝腺瘤等， 一般而言，各种肝良性占位疾病的治疗预后良好。但一些肝良性占位疾病也可能有癌变的危险。最终诊断依靠病理。建议到正规医院诊治。
肝癌早期和肝血管瘤做B超能区分出来	肝癌在B超上一般提示为低回声结节，结节中可以见到少量的血流信号，典型的小血管瘤呈中等回声光团，密度均匀，界限清晰，形状规则。而海绵状血管瘤内部回声强弱不等，并有形态不规则、大小不等的无回声区，如有钙化灶可见强回声伴声影。如果要进一步明确的话，还可以考虑查肝脏增强CT或者是MRI。最终诊断依靠病理。若发现此病建议到正规医院诊治。
肝脏有血管瘤还有囊肿？	肝癌在B超上一般提示为低回声结节，结节中可以见到少量的血流信号，典型的小血管瘤呈中等回声光团，密度均匀，界限清晰，形状规则。而海绵状血管瘤内部回声强弱不等，并有形态不规则、大小不等的无回声区，如有钙化灶可见强回声伴声影。如果要进一步明确的话，还可以考虑查肝脏增强CT或者是MRI。最终诊断依靠病理。若发现此病建议到正规医院诊治。
肝右前叶下段血管瘤，肝内多发小囊肿如何治疗？	肝癌在B超上一般提示为低回声结节，结节中可以见到少量的血流信号，典型的小血管瘤呈中等回声光团，密度均匀，界限清晰，形状规则。而海绵状血管瘤内部回声强弱不等，并有形态不规则、大小不等的无回声区，如有钙化灶可见强回声伴声影。如果要进一步明确的话，还可以考虑查肝脏增强CT或者是MRI。最终诊断依靠病理。若发现此病建议到正规医院诊治。
今天公务员体检，B超检测肝脏有肝血管瘤，不知是否影响	建议咨询相关单位及法律条文。肝海绵状血管瘤是最常见的肝良性肿瘤，小的无症状的肝血管瘤不需治疗，但应每隔3-6个月做B超检查，动态观察肿瘤变化。直径大于10cm或有发生外伤性破裂大出血的可能或肿瘤虽小，但有明显症状或不能排除肝癌的肝血管瘤可行手术切除。若诊断此病建议到正规医院诊治。
肝脏血管瘤是单发还是多发	肝海绵状血管瘤是最常见的肝良性肿瘤，本病可单发，也可多发，左右肝叶均可发生，但以肝右叶多见。肿瘤大小不一，小者仅在显微镜下才能确诊，大者重达十余千克。若诊断此病建议到正规医院诊治。
肝脏血管瘤一年长多大为正常？	肝海绵状血管瘤是最常见的肝良性肿瘤，本病发展缓慢，病程可达数年至数十年之久，目前没有证据显示肝血管瘤一年长多大为正常。小的无症状的肝血管瘤不需治疗，但应每隔3-6个月做B超检查，动态观察肿瘤变化。直径大于10cm或有发生外伤性破裂大出血的可能或肿瘤虽小，但有明显症状或不能排除肝癌的肝血管瘤可行手术切除。若诊断此病建议到正规医院诊治。
肝血管瘤属于恶性肿瘤吗	肝海绵状血管瘤是最常见的肝良性肿瘤，多认为起源于肝内的胚胎性血管错构芽，由于某种因素作用，如服用类固醇激素、避孕药以及妇女怀孕等，引起肿瘤样增生而形成。该病为良性肝脏肿瘤，不是癌症，一般不会癌变，若诊断此病建议到正规医院诊治。
肝血管瘤是癌症的一种吗？	肝海绵状血管瘤是最常见的肝良性肿瘤，多认为起源于肝内的胚胎性血管错构芽，由于某种因素作用，如服用类固醇激素、避孕药以及妇女怀孕等，引起肿瘤样增生而形成。该病为良性肝脏肿瘤，不是癌症，一般不会癌变，若诊断此病建议到正规医院诊治。
肝上血管瘤能病变吗怎么确定是良性还是恶性	肝海绵状血管瘤是最常见的肝良性肿瘤，多认为起源于肝内的胚胎性血管错构芽，由于某种因素作用，如服用类固醇激素、避孕药以及妇女怀孕等，引起肿瘤样增生而形成。该病为良性肝脏肿瘤，不是癌症，一般不会癌变，若诊断此病建议到正规医院诊治。
肝血管瘤为什么有时看见有时看不见	肝海绵状血管瘤是最常见的肝良性肿瘤，当血管瘤较小，血管成分多时，与肝的密度接近时，B超检查时不容易看出来，建议到正规医院行增强CT或MRI检查以明确诊断，最终诊断依靠病理。
肝肿瘤是良性还是恶性通过那项检查能确定	初步判断肝肿瘤的性质主要是靠增强CT或MRI结合甲胎蛋白的检查结果。如果根据病史、症状和体征，影像学检查疑似恶性，再加上甲胎蛋白异常增高的话，基本上可以初步诊断为恶性的。最终诊断依靠病理结果。建议怀疑肝脏肿瘤到正规医院就诊。
肝肿瘤，是良性还是恶性，能从CT看出啦吗	初步判断肝肿瘤的性质主要是靠增强CT或MRI结合甲胎蛋白的检查结果。如果根据病史、症状和体征，影像学检查疑似恶性，再加上甲胎蛋白异常增高的话，基本上可以初步诊断为恶性的。最终诊断依靠病理结果。建议怀疑肝脏肿瘤到正规医院就诊。
肝血管瘤之肝动脉瘤是什么	肝海绵状血管瘤是最常见的肝良性肿瘤，小的无症状的肝血管瘤不需治疗，但应每隔3-6个月做B超检查，动态观察肿瘤变化。直径大于10cm或有发生外伤性破裂大出血的可能或肿瘤虽小，但有明显症状或不能排除肝癌的肝血管瘤可行手术切除。而肝动脉瘤则不一样，非常少见，它分为肝内型（罕见）可引起胆道出血，肝外型可破裂引起腹腔大出血。一旦发现，就需要及时治疗，进行手术或介入栓塞治疗。
肝S3段属于囊肿还是肿瘤	肝脏的分段临床中最常用的是Couinaud 分段法。Couinaud肝脏分段法是依据功能将肝脏分为8个独立的段，每段有自己的流入和流出血管以及胆管系统。S3段是其中一个肝段。肝囊肿是比较常见的一种肝脏良性疾病，主要有寄生虫性、非寄生虫性肝囊肿，非寄生虫性肝囊肿可分为先天性、创伤性、炎症性和肿瘤性囊肿。肝肿瘤包括肝良性肿瘤如血管瘤，肝腺瘤，局灶性结节性增生等，肝恶性肿瘤如原发性肝癌等。
肝血管瘤有什么注意事项吗？	肝海绵状血管瘤是最常见的肝良性肿瘤，小的无症状的肝血管瘤不需治疗，但应每隔3-6个月做B超检查，动态观察肿瘤变化。直径大于10cm或有发生外伤性破裂大出血的可能或肿瘤虽小，但有明显症状或不能排除肝癌的肝血管瘤可行手术切除。本病发展较慢，预后良好，但妊娠可促使瘤体迅速增大，如此时遇意外奸娠或分娩时腹压上升因素，有增加自发性破裂的可能。有些病人还会出现某些凝血因子减少，合并血小板减少性紫殿，引起出血及溶血而死亡。也有因回心血量增多，心脏负担加重而导致心力衰竭。肝海绵状血管瘤切除术后复发较为常见，主要原因是肿瘤为多发性或术中切除未尽。复发后可再手术或放射治疗或局部注射硬化治疗。若诊断此病建议到正规医院诊治，定期复查，避免可能造成肝外伤的剧烈运动，保持情绪平稳，清淡饮食，戒烟戒酒。
体检发现肝脏血管瘤，会癌变吗？会破裂大出血吗？	肝海绵状血管瘤是最常见的肝良性肿瘤，一般不会癌变。妊娠可促使瘤体迅速增大，如此时遇意外奸娠或分娩时腹压上升因素，有增加自发性破裂的可能；也有发生外伤性破裂大出血的可能，若诊断此病建议到正规医院诊治。
肝部血管瘤会不会被DR胸片检查出来	肝海绵状血管瘤是最常见的肝良性肿瘤，B超是最为常用的检查方法。MRI能检出＜1cm的肿瘤，呈“灯泡征”。肝血管瘤一般不会被DR胸片检查出来，若怀疑此病建议到正规医院诊治。
肝脏血管瘤属于肿瘤吗？	肝海绵状血管瘤是最常见的肝良性肿瘤，多认为起源于肝内的胚胎性血管错构芽，由于某种因素作用，如服用类固醇激素、避孕药以及妇女怀孕等，引起肿瘤样增生而形成。若诊断此病建议到正规医院诊治。
肝血管瘤属于肝病吗？	肝海绵状血管瘤是最常见的肝良性肿瘤，多认为起源于肝内的胚胎性血管错构芽，由于某种因素作用，如服用类固醇激素、避孕药以及妇女怀孕等，引起肿瘤样增生而形成。若诊断此病建议到正规医院诊治。
肝右后叶不典型血管瘤？	肝海绵状血管瘤是最常见的肝良性肿瘤，多认为起源于肝内的胚胎性血管错构芽，由于某种因素作用，如服用类固醇激素、避孕药以及妇女怀孕等，引起肿瘤样增生而形成。若诊断此病建议到正规医院诊治。
肝上有个小的血管瘤说是良性的我该怎么办很严重吗	肝海绵状血管瘤是最常见的肝良性肿瘤，小的无症状的肝血管瘤不需治疗，但应每隔3-6个月做B超检查，动态观察肿瘤变化。直径大于10cm或有发生外伤性破裂大出血的可能或肿瘤虽小，但有明显症状或不能排除肝癌的肝血管瘤可行手术切除。本病发展较慢，预后良好。若诊断此病建议到正规医院诊治。
得了肝脏血管瘤，该怎么办？	肝海绵状血管瘤是最常见的肝良性肿瘤，小的无症状的肝血管瘤不需治疗，但应每隔3-6个月做B超检查，动态观察肿瘤变化。直径大于10cm或有发生外伤性破裂大出血的可能或肿瘤虽小，但有明显症状或不能排除肝癌的肝血管瘤可行手术切除。本病发展较慢，预后良好。若诊断此病建议到正规医院诊治。
肝脏上长肝血管瘤需要治疗吗	肝海绵状血管瘤是最常见的肝良性肿瘤，小的无症状的肝血管瘤不需治疗，但应每隔3-6个月做B超检查，动态观察肿瘤变化。直径大于10cm或有发生外伤性破裂大出血的可能或肿瘤虽小，但有明显症状或不能排除肝癌的肝血管瘤可行手术切除。本病发展较慢，预后良好。若诊断此病建议到正规医院诊治。
得了肝血管瘤该怎么治疗才好呢？	肝海绵状血管瘤是最常见的肝良性肿瘤，小的无症状的肝血管瘤不需治疗，但应每隔3-6个月做B超检查，动态观察肿瘤变化。直径大于10cm或有发生外伤性破裂大出血的可能或肿瘤虽小，但有明显症状或不能排除肝癌的肝血管瘤可行手术切除。本病发展较慢，预后良好。若诊断此病建议到正规医院诊治。
得了肝血管瘤到底需要开刀吗？	肝海绵状血管瘤是最常见的肝良性肿瘤，小的无症状的肝血管瘤不需治疗，但应每隔3-6个月做B超检查，动态观察肿瘤变化。直径大于10cm或有发生外伤性破裂大出血的可能或肿瘤虽小，但有明显症状或不能排除肝癌的肝血管瘤可行手术切除。本病发展较慢，预后良好。若诊断此病建议到正规医院诊治。
得了肝血管瘤需不需要治疗吗？	肝海绵状血管瘤是最常见的肝良性肿瘤，小的无症状的肝血管瘤不需治疗，但应每隔3-6个月做B超检查，动态观察肿瘤变化。直径大于10cm或有发生外伤性破裂大出血的可能或肿瘤虽小，但有明显症状或不能排除肝癌的肝血管瘤可行手术切除。本病发展较慢，预后良好。若诊断此病建议到正规医院诊治。
肝血管瘤怎么办？	肝海绵状血管瘤是最常见的肝良性肿瘤，小的无症状的肝血管瘤不需治疗，但应每隔3-6个月做B超检查，动态观察肿瘤变化。直径大于10cm或有发生外伤性破裂大出血的可能或肿瘤虽小，但有明显症状或不能排除肝癌的肝血管瘤可行手术切除。本病发展较慢，预后良好。若诊断此病建议到正规医院诊治。
小孩子的肝血管瘤怎么治疗？	肝海绵状血管瘤是最常见的肝良性肿瘤，小的无症状的肝血管瘤不需治疗，但应每隔3-6个月做B超检查，动态观察肿瘤变化。直径大于10cm或有发生外伤性破裂大出血的可能或肿瘤虽小，但有明显症状或不能排除肝癌的肝血管瘤可行手术切除。肝海绵状血管瘤最危险的并发症是血管瘤自发性破裂，且在婴幼儿较多见。因此，对新生儿肝海绵状血管瘤确诊后，应尽早手术治疗。若诊断此病建议到正规医院诊治。
肝囊肿和肝血管瘤如何区分呢？	肝血管瘤多见于遗传因素，常见为海绵状血管瘤，小于五厘米通常无症状，生长缓慢，增大者可出现食欲不振腹胀恶心呕吐等，B超，增强CT或MRI检查可诊断，必要时手术治疗。肝囊肿内容为水样液，B超检查低回声，通常无症状，增大者可出现周围压迫症状。建议到正规医院就诊，B超，CT，核磁等检查即可鉴别，根据具体情况合理治疗即可，多数患者定期复诊即可。
肝血管瘤与肝囊肿有区别吗？	肝血管瘤多见于遗传因素，常见为海绵状血管瘤，小于五厘米通常无症状，生长缓慢，增大者可出现食欲不振腹胀恶心呕吐等，B超，增强CT或MRI检查可诊断，必要时手术治疗。肝囊肿内容为水样液，B超检查低回声，通常无症状，增大者可出现周围压迫症状。建议到正规医院就诊，B超，CT，核磁等检查即可鉴别，根据具体情况合理治疗即可，多数患者定期复诊即可。
肝囊肿和血管瘤是一回事吗？	肝血管瘤多见于遗传因素，常见为海绵状血管瘤，小于五厘米通常无症状，生长缓慢，增大者可出现食欲不振腹胀恶心呕吐等，B超，增强CT或MRI检查可诊断，必要时手术治疗。肝囊肿内容为水样液，B超检查低回声，通常无症状，增大者可出现周围压迫症状。建议到正规医院就诊，B超，CT，核磁等检查即可鉴别，根据具体情况合理治疗即可，多数患者定期复诊即可。
肝血管瘤与肝囊肿的区别	肝血管瘤多见于遗传因素，常见为海绵状血管瘤，小于五厘米通常无症状，生长缓慢，增大者可出现食欲不振腹胀恶心呕吐等，B超，增强CT或MRI检查可诊断，必要时手术治疗。肝囊肿内容为水样液，B超检查低回声，通常无症状，增大者可出现周围压迫症状。建议到正规医院就诊，B超，CT，核磁等检查即可鉴别，根据具体情况合理治疗即可，多数患者定期复诊即可。
肝血管瘤与肝囊肿的区别	肝血管瘤多见于遗传因素，常见为海绵状血管瘤，小于五厘米通常无症状，生长缓慢，增大者可出现食欲不振腹胀恶心呕吐等，B超，增强CT或MRI检查可诊断，必要时手术治疗。肝囊肿内容为水样液，B超检查低回声，通常无症状，增大者可出现周围压迫症状。建议到正规医院就诊，B超，CT，核磁等检查即可鉴别，根据具体情况合理治疗即可，多数患者定期复诊即可。
肝血管瘤与肝囊肿有什么区别	肝血管瘤多见于遗传因素，常见为海绵状血管瘤，小于五厘米通常无症状，生长缓慢，增大者可出现食欲不振腹胀恶心呕吐等，B超，增强CT或MRI检查可诊断，必要时手术治疗。肝囊肿内容为水样液，B超检查低回声，通常无症状，增大者可出现周围压迫症状。建议到正规医院就诊，B超，CT，核磁等检查即可鉴别，根据具体情况合理治疗即可，多数患者定期复诊即可。
肝血管瘤和肝囊肿怎么区分	肝血管瘤多见于遗传因素，常见为海绵状血管瘤，小于五厘米通常无症状，生长缓慢，增大者可出现食欲不振腹胀恶心呕吐等，B超，增强CT或MRI检查可诊断，必要时手术治疗。肝囊肿内容为水样液，B超检查低回声，通常无症状，增大者可出现周围压迫症状。建议到正规医院就诊，B超，CT，核磁等检查即可鉴别，根据具体情况合理治疗即可，多数患者定期复诊即可。
肝血管瘤和肝动脉瘤是一回事吗？	肝海绵状血管瘤是最常见的肝良性肿瘤，小的无症状的肝血管瘤不需治疗，但应每隔3-6个月做B超检查，动态观察肿瘤变化。直径大于10cm或有发生外伤性破裂大出血的可能或肿瘤虽小，但有明显症状或不能排除肝癌的肝血管瘤可行手术切除。而肝动脉瘤则不一样，非常少见，它分为肝内型（罕见）可引起胆道出血，肝外型可破裂引起腹腔大出血。一旦发现，就需要及时治疗，进行手术或介入栓塞治疗。
肝血管瘤是动脉瘤吗？	肝海绵状血管瘤是最常见的肝良性肿瘤，小的无症状的肝血管瘤不需治疗，但应每隔3-6个月做B超检查，动态观察肿瘤变化。直径大于10cm或有发生外伤性破裂大出血的可能或肿瘤虽小，但有明显症状或不能排除肝癌的肝血管瘤可行手术切除。而肝动脉瘤则不一样，非常少见，它分为肝内型（罕见）可引起胆道出血，肝外型可破裂引起腹腔大出血。一旦发现，就需要及时治疗，进行手术或介入栓塞治疗。
肝血管瘤和肝结节有什么区别？	肝结节是由于各种因素导致的肝脏纤维组织增生并且引起肝小梁排列紊乱所形成。肝海绵状血管瘤是最常见的肝良性肿瘤，小的无症状的肝血管瘤不需治疗，但应每隔3-6个月做B超检查，动态观察肿瘤变化。直径大于10cm或有发生外伤性破裂大出血的可能或肿瘤虽小，但有明显症状或不能排除肝癌的肝血管瘤可行手术切除。若发现肝脏病变建议到正规医院诊治。
肝血管瘤是癌症吗？	肝海绵状血管瘤是最常见的肝良性肿瘤，多认为起源于肝内的胚胎性血管错构芽，由于某种因素作用，如服用类固醇激素、避孕药以及妇女怀孕等，引起肿瘤样增生而形成。该病为良性肝脏肿瘤，不是癌症，一般不会癌变，若诊断此病建议到正规医院诊治。
肝血管瘤就是肝癌吗？能够治好么？	肝海绵状血管瘤是最常见的肝良性肿瘤，多认为起源于肝内的胚胎性血管错构芽，由于某种因素作用，如服用类固醇激素、避孕药以及妇女怀孕等，引起肿瘤样增生而形成。该病为良性肝脏肿瘤，不是癌症，一般不会癌变，若诊断此病建议到正规医院诊治。
肝血管瘤有恶性的可能吗？	肝海绵状血管瘤是最常见的肝良性肿瘤，多认为起源于肝内的胚胎性血管错构芽，由于某种因素作用，如服用类固醇激素、避孕药以及妇女怀孕等，引起肿瘤样增生而形成。该病为良性肝脏肿瘤，不是癌症，一般不会癌变，若诊断此病建议到正规医院诊治。
肝血管瘤长得很快，且有疼痛，是肝癌吗	肝海绵状血管瘤是最常见的肝良性肿瘤，多认为起源于肝内的胚胎性血管错构芽，由于某种因素作用，如服用类固醇激素、避孕药以及妇女怀孕等，引起肿瘤样增生而形成。该病为良性肝脏肿瘤，不是癌症，一般不会癌变，若诊断此病建议到正规医院诊治。
怎么样判断肝血管瘤是良性还是恶性的	肝海绵状血管瘤是最常见的肝良性肿瘤，多认为起源于肝内的胚胎性血管错构芽，由于某种因素作用，如服用类固醇激素、避孕药以及妇女怀孕等，引起肿瘤样增生而形成。该病为良性肝脏肿瘤，不是癌症，一般不会癌变，若诊断此病建议到正规医院诊治。
肝血管瘤算是大病吗？	肝海绵状血管瘤是最常见的肝良性肿瘤，小的无症状的肝血管瘤不需治疗，但应每隔3-6个月做B超检查，动态观察肿瘤变化。直径大于10cm或有发生外伤性破裂大出血的可能或肿瘤虽小，但有明显症状或不能排除肝癌的肝血管瘤可行手术切除。本病发展较慢，预后良好。若诊断此病建议到正规医院诊治。
疑似肝血管瘤，做了加强CT也不能确诊吗	肝海绵状血管瘤是最常见的肝良性肿瘤，一般肝血管瘤能通过增强CT检查出来，肝血管瘤在CT检测时病灶边缘呈现高密度强化，增强的区域是进行性向病灶中央发生扩大散，而且持续时间长，延迟扫描病灶呈等密度充填，等密度持续时间10—15分钟。呈圆形或卵圆形低密度，境界清楚，密度均匀。大的血管瘤，通常４cm以上，瘤灶中央可见更低密度区，呈裂隙状。要注意的是CT断层扫描间隙大，较小的血管瘤有可能看不到。最终诊断依靠病理。若怀疑此病建议到正规医院诊治。
B超查出肝血管瘤与肝癌的区别？	肝癌在B超上一般提示为低回声结节，结节中可以见到少量的血流信号，典型的小血管瘤呈中等回声光团，密度均匀，界限清晰，形状规则。而海绵状血管瘤内部回声强弱不等，并有形态不规则、大小不等的无回声区，如有钙化灶可见强回声伴声影。如果要进一步明确的话，还可以考虑查肝脏增强CT或者是MRI。最终诊断依靠病理。若发现此病建议到正规医院诊治。
肝内有结节一定是血管瘤吗？	肝内有结节不一定是血管瘤。还有可能是肝良性占位病变如局灶性节结性增生， 肝恶性占位病变如肝癌等。肝海绵状血管瘤是最常见的肝良性肿瘤，小的无症状的肝血管瘤不需治疗，但应每隔3-6个月做B超检查，动态观察肿瘤变化。直径大于10cm或有发生外伤性破裂大出血的可能或肿瘤虽小，但有明显症状或不能排除肝癌的肝血管瘤可行手术切除。若怀疑此病建议到正规医院诊治，结合病史、症状和体征、实验室检查、肝脏增强CT或MRI可明确诊断。最终诊断依靠病理。
肝血管瘤与脂肪肝怎么鉴别	脂肪肝是指由于各种原因引起的肝细胞内脂肪堆积过多的病变，根据病因可分为肥胖性脂肪肝、酒精性脂肪肝，快速减肥性脂肪肝、营养不良性脂肪肝、糖尿病脂肪肝等。肝海绵状血管瘤是最常见的肝良性肿瘤，一般可通过病史、症状、体征、生化指标、B超、CT、MRI等予以鉴别，若怀疑肝血管瘤和脂肪肝建议到正规医院诊治。
肝血管瘤会是肝癌误诊吗？	肝海绵状血管瘤是最常见的肝良性肿瘤，B超是最为常用的检查方法。典型的小血管瘤，呈中等回声光团，密度均匀。而海绵状血管瘤内部回声强弱不等，如有钙化灶可见强回声伴声影。肝癌在B超上一般提示为低回声结节，结节中可以见到少量的血流信号，只通过B超检查肝癌有可能误诊为血管瘤，结合病史、症状、体征、辅助检查、AFP、肝脏增强CT或MRI等可明确诊断。最终诊断依靠病理。若诊断此病建议到正规医院诊治。
肝血管瘤如何确诊	肝海绵状血管瘤是最常见的肝良性肿瘤，B超是最为常用的检查方法。典型的小血管瘤，因血管组织较为致密，呈中等回声光团，密度均匀，界限清晰，形状规则。而海绵状血管瘤内部回声强弱不等，如有钙化灶可见强回声伴声影。MRI能检出＜1cm的肿瘤，呈“灯泡征”。根据病史、症状、体征、辅助检查、AFP、肝脏增强CT或MRI等可明确诊断，最终诊断依靠病理。若诊断此病建议到正规医院诊治。
乳腺癌术后，化疗6次，半年复查有肝囊肿和血管瘤，怎么办	肝海绵状血管瘤是最常见的肝良性肿瘤，小的无症状的肝血管瘤不需治疗，但应每隔3-6个月做B超检查，动态观察肿瘤变化。直径大于10cm或有发生外伤性破裂大出血的可能或肿瘤虽小，但有明显症状或不能排除肝癌的肝血管瘤可行手术切除。肝囊肿是比较常见的一种肝脏良性疾病，主要有寄生虫性、非寄生虫性肝囊肿，非寄生虫性肝囊肿可分为先天性、创伤性、炎症性和肿瘤性囊肿。建议到正规医院诊治，定期复查，在肿瘤或囊肿比较大的情况下，及时手术治疗。
得了肝血管瘤要注意哪些问题啊？	肝海绵状血管瘤是最常见的肝良性肿瘤，小的无症状的肝血管瘤不需治疗，但应每隔3-6个月做B超检查，动态观察肿瘤变化。直径大于10cm或有发生外伤性破裂大出血的可能或肿瘤虽小，但有明显症状或不能排除肝癌的肝血管瘤可行手术切除。本病发展较慢，预后良好，但妊娠可促使瘤体迅速增大，如此时遇意外奸娠或分娩时腹压上升因素，有增加自发性破裂的可能。有些病人还会出现某些凝血因子减少，合并血小板减少性紫殿，引起出血及溶血而死亡。也有因回心血量增多，心脏负担加重而导致心力衰竭。肝海绵状血管瘤切除术后复发较为常见，主要原因是肿瘤为多发性或术中切除未尽。复发后可再手术或放射治疗或局部注射硬化治疗。若诊断此病建议到正规医院诊治，定期复查，避免可能造成肝外伤的剧烈运动，保持情绪平稳，清淡饮食，戒烟戒酒。
肝右叶血管瘤严重吗，需要注意什么	肝海绵状血管瘤是最常见的肝良性肿瘤，小的无症状的肝血管瘤不需治疗，但应每隔3-6个月做B超检查，动态观察肿瘤变化。直径大于10cm或有发生外伤性破裂大出血的可能或肿瘤虽小，但有明显症状或不能排除肝癌的肝血管瘤可行手术切除。本病发展较慢，预后良好，但妊娠可促使瘤体迅速增大，如此时遇意外奸娠或分娩时腹压上升因素，有增加自发性破裂的可能。有些病人还会出现某些凝血因子减少，合并血小板减少性紫殿，引起出血及溶血而死亡。也有因回心血量增多，心脏负担加重而导致心力衰竭。肝海绵状血管瘤切除术后复发较为常见，主要原因是肿瘤为多发性或术中切除未尽。复发后可再手术或放射治疗或局部注射硬化治疗。若诊断此病建议到正规医院诊治，定期复查，避免可能造成肝外伤的剧烈运动，保持情绪平稳，清淡饮食，戒烟戒酒。
肝脏良性肿瘤怎么办？	针对肝脏良性肿瘤而言，如果该肿瘤病变的体积比较小，并且还没有对周围的结构造成压迫，同时没有对肝脏的正常功能造成一定影响的话，如果您并没有感受到任何不适的话，通常无需对其进行治疗，只需要定期进行诊断，观察肿瘤变化即可。但是，如果肿瘤的体积比较大，压迫附近的神经，干扰肝脏功能的话，建议进行手术或者是通过微创的方法进行一定的治疗，以保证身体健康。
肝癌和肝脏血管瘤相似吗？	肝海绵状血管瘤是最常见的肝良性肿瘤，多认为起源于肝内的胚胎性血管错构芽，由于某种因素作用，如服用类固醇激素、避孕药以及妇女怀孕等，引起肿瘤样增生而形成。肝癌是起源于上皮组织的原发性肝恶行肿瘤，发病与肝硬化、病毒性肝炎、黄曲霉毒素等相关。两者在病因、症状和体征、病程、影像学表现、肿瘤标志物、治疗原则和预后方面相差较大。若发现肝癌或肝血管瘤建议到正规医院就诊。
做完肝血管瘤介入手术后多久可以运动	肝动脉介入栓塞术具有创伤小、花费少、术后恢复快等优点，一般术后拔除鞘管后即可下地适量活动，但要避免剧烈运动，撞击等可能引起并发症的风险。
推荐肝血管瘤介入治疗？	肝血管瘤作为一种良性肿瘤，大多无症状，且无恶变倾向。原则上以随访观察为主，这是目前国内外普遍接受的观念。当血管瘤较大且合并危险因素时，建议酌情治疗。手术切除治疗肝血管瘤是目前认为最为确切的治疗手段；介入治疗具有创伤小、术后恢复快等优点，但复发率相对较高。这些方法都有其适应症与禁忌症，建议患者到正规医院就诊，根据患者情况及医院条件选择适合的诊治方案。
肝血管瘤介入治疗好还是手术治疗好？	肝血管瘤作为一种良性肿瘤，大多无症状，且无恶变倾向。原则上以随访观察为主，这是目前国内外普遍接受的观念。当血管瘤较大且合并危险因素时，建议酌情治疗。手术切除治疗肝血管瘤是目前认为最为确切的治疗手段；介入治疗具有创伤小、术后恢复快等优点，但复发率相对较高。这些方法都有其适应症与禁忌症，建议患者到正规医院就诊，根据患者情况及医院条件选择适合的诊治方案。
肝血管瘤介入治疗效果好吗	肝血管瘤作为一种良性肿瘤，大多无症状，且无恶变倾向。原则上以随访观察为主，这是目前国内外普遍接受的观念。当血管瘤较大且合并危险因素时，建议酌情治疗。介入治疗具有创伤小、术后恢复快等优点，但复发率相对较高；手术切除治疗肝血管瘤是目前认为最为确切的治疗手段。这些方法都有其适应症与禁忌症，建议患者到正规医院就诊，根据患者情况及医院条件选择适合的诊治方案。
肝血管瘤介入治疗效果如何	肝血管瘤作为一种良性肿瘤，大多无症状，且无恶变倾向。原则上以随访观察为主，这是目前国内外普遍接受的观念。当血管瘤较大且合并危险因素时，建议酌情治疗。介入治疗具有创伤小、术后恢复快等优点，但复发率相对较高；手术切除治疗肝血管瘤是目前认为最为确切的治疗手段。这些方法都有其适应症与禁忌症，建议患者到正规医院就诊，根据患者情况及医院条件选择适合的诊治方案。
介入栓塞治疗肝血管瘤有效吗	肝血管瘤作为一种良性肿瘤，大多无症状，且无恶变倾向。原则上以随访观察为主，这是目前国内外普遍接受的观念。当血管瘤较大且合并危险因素时，建议酌情治疗。介入栓塞治疗具有创伤小、术后恢复快等优点，但复发率相对较高；手术切除治疗肝血管瘤是目前认为最为确切的治疗手段。这些方法都有其适应症与禁忌症，建议患者到正规医院就诊，根据患者情况及医院条件选择适合的诊治方案。
肝脏血管瘤用微创消融术好不好？	肝血管瘤作为一种良性肿瘤，大多无症状，且无恶变倾向。原则上以随访观察为主，这是目前国内外普遍接受的观念。当血管瘤较大且合并危险因素时，建议酌情治疗。局部消融术是目前应用较多的肝血管瘤微创治疗方法，其疗效确切，并发症发生率低，但应把握好指征。（1）伴有危险因素的单个或多发型肝血管瘤，位于肝脏实质内，有经肝脏实质的进针路径，周围无大血管、胆管及重要脏器，凝血功能良好的病人。（2）伴有全身其他脏器功能损害，不适合手术切除的肝血管瘤。建议到正规医院就诊咨询，根据患者情况及医院条件，选择适合的诊疗方案。
肝血管瘤介入和微创介导哪个更好？	肝血管瘤作为一种良性肿瘤，大多无症状，且无恶变倾向。原则上以随访观察为主，这是目前国内外普遍接受的观念。当血管瘤较大且合并危险因素时，建议酌情治疗。手术切除治疗肝血管瘤是目前认为最为确切的治疗手段；介入治疗具有创伤小、术后恢复快等优点，但复发率相对较高；局部消融术是目前应用较多的肝血管瘤微创治疗方法，其疗效确切，并发症发生率低。这些方法都有其适应症与禁忌症，建议患者到正规医院就诊，根据患者情况及医院条件选择适合的诊治方案。
肝血管瘤做介入后还会复发吗	肝血管瘤作为一种良性肿瘤，大多无症状，且无恶变倾向。原则上以随访观察为主，这是目前国内外普遍接受的观念。当血管瘤较大且合并危险因素时，建议酌情治疗。介入栓塞治疗具有创伤小、术后恢复快等优点，但复发率相对较高。复发时患者可能无明显症状或出现腹痛、腹部包块等不适，建议患者行介入治疗后定期门诊复查，每隔3-6个月做B超检查，观察术后病情恢复情况。
肝血管瘤射频消融术后，容易复发吗？复发有什么现象？	肝血管瘤作为一种良性肿瘤，大多无症状，且无恶变倾向。原则上以随访观察为主，这是目前国内外普遍接受的观念。当血管瘤较大且合并危险因素时，建议酌情治疗。局部消融术是目前应用较多的肝血管瘤微创治疗方法，其疗效确切，并发症发生率低，既往研究结果显示：局部消融术治疗效果满意，肿瘤出现体积缩小，症状缓解，但仍有复发可能。复发时患者可能无明显症状或出现腹痛、腹部包块等不适，建议患者行局部消融术后定期门诊复查，每隔3-6个月做B超检查，观察术后病情恢复情况。
肝血管瘤采用微创介导治疗费大约多少钱？	肝血管瘤作为一种良性肿瘤，大多无症状，且无恶变倾向。原则上以随访观察为主，这是目前国内外普遍接受的观念。当血管瘤较大且合并危险因素时，建议酌情治疗。肝血管瘤的治疗方法有手术治疗、局部消融术、肝动脉介入栓塞术。这些方法都有相应的适应症和禁忌症，具体费用根据患者患者就诊医院、住院情况、身体条件、术中药物器材等、术后恢复等情况决定。
肝血管瘤介入治疗哪些方法好	局部消融术治疗方式包括经皮肝血管瘤RFA、腹腔镜下或开腹肝血管瘤局部消融术。肝动脉介入栓塞术通过碘化油将平阳霉素带入并聚集于血管瘤血窦内，使血管瘤内血窦持续栓塞，最终因血窦腔闭塞导致瘤体缺乏营养逐渐硬化纤维化。这些方法都有其适应症与禁忌症，需要根据患者及医院具体情况选择最佳方案。
肝肿瘤介入术后并发症及术后注意事项	肝动脉介入栓塞术具有创伤小、花费少、术后恢复快等优点，近期疗效比较确切，但远期复发率相对较高。肝动脉介入栓塞术也可能造成异位栓塞导致各种并发症的发生。术后需注意手术切口处保护，避免出现剧烈运动，撞击等可能引起并发症的风险。要鼓励患者尽早进食，尤其是饮水，开始的时候可先进食低盐、低脂、富含维生素、易于消化饮食，逐步过度到正常饮食，多吃新鲜蔬菜和水果，保持大便通畅。以后定期复查，了解肝血管瘤是否复发。
肝肿瘤介入治疗的风险	局部消融术的风险包括出血、脓肿形成、胃肠道穿孔、肝功能衰竭、胆管损伤、门静脉血栓、需要引流的血气胸等，发生率为0.6%~8.9%，烧灼面积过大、时间过久易并发血红蛋白尿。肝动脉介入栓塞术的风险包括异位栓塞导致各种并发症的发生、术后感染、肝区疼痛加重，介入术后可能出现恶心，呕吐，腹胀，发热（37.5～38.5℃）等症状。
肝血管瘤介入治疗一年后需要再复查吗	肝动脉介入栓塞术具有创伤小、花费少、术后恢复快等优点，近期疗效比较确切，但远期复发率相对较高。术后需定期复查肝胆胰脾超声或CT等检查，观察肝血管瘤是否复发。
肝血管瘤会影响寿命吗	肝血管瘤属肝脏良性病变，无明显恶变表现及倾向，一般情况下对寿命没有影响的。但如果出现严重并发症时，如肝血管瘤破裂、血小板减少症和低纤维蛋白原血症、肝脏肿大等，可能会影响身体健康，严重时危及生命，需立即到正规医院就诊治疗。此外，对于诊断不是特别明确的患者，建议行核磁共振增强扫描等检查明确诊断，根据检查结果决定进一步诊治方案。
得了肝血管瘤可以活多久了？	肝血管瘤属肝脏良性病变，无明显恶变表现及倾向，一般情况下对寿命没有影响的。但如果出现严重并发症时，如肝血管瘤破裂、血小板减少症和低纤维蛋白原血症、肝脏肿大等，可能会影响身体健康，严重时危及生命，需立即到正规医院就诊治疗。此外，对于诊断不是特别明确的患者，建议行核磁共振增强扫描等检查明确诊断，根据检查结果决定进一步诊治方案。
肝脏肿瘤切除后可以活多久？	肝血管瘤属肝脏良性病变，无明显恶变表现及倾向，一般情况下对寿命没有影响的。但如果出现严重并发症时，如肝血管瘤破裂、血小板减少症和低纤维蛋白原血症、肝脏肿大等，可能会影响身体健康，严重时危及生命，需立即到正规医院就诊治疗。此外，对于诊断不是特别明确的患者，建议行核磁共振增强扫描等检查明确诊断，根据检查结果决定进一步诊治方案。
肝上有血管瘤能活多久？	肝血管瘤属肝脏良性病变，无明显恶变表现及倾向，一般情况下对寿命没有影响的。但如果出现严重并发症时，如肝血管瘤破裂、血小板减少症和低纤维蛋白原血症、肝脏肿大等，可能会影响身体健康，严重时危及生命，需立即到正规医院就诊治疗。此外，对于诊断不是特别明确的患者，建议行核磁共振增强扫描等检查明确诊断，根据检查结果决定进一步诊治方案。
肝血管瘤8mmX7mm能活多久能治好吗	肝血管瘤属肝脏良性病变，无明显恶变表现及倾向，一般情况下对寿命没有影响的。但如果出现严重并发症时，如肝血管瘤破裂、血小板减少症和低纤维蛋白原血症、肝脏肿大等，可能会影响身体健康，严重时危及生命，需立即到正规医院就诊治疗。此外，对于诊断不是特别明确的患者，建议行核磁共振增强扫描等检查明确诊断，根据检查结果决定进一步诊治方案。当血管瘤较大且合并一些危险因素时，建议酌情治疗。一般治疗方法有手术治疗、局部消融术、肝动脉介入栓塞术，每种方法有其适应症和禁忌症，建议到正规医院就诊，根据患者病情决定治疗方案。
肝血管瘤可以自愈吗？	肝血管瘤属肝脏良性病变，无明显恶变表现及倾向，但不治疗不会自己消失，小的无症状的肝血管瘤不需治疗，但应每隔3-6个月做B超检查，动态观察肿瘤变化。直径大于10cm或有发生外伤性破裂大出血的可能，如肿瘤虽小，但有明显症状或不能排除肝癌的肝血管瘤可行手术切除。
肝血管瘤影响公务员体检吗	可以通过，根据《公务员录用体检通用标准（试行）》第七条规定：各种急慢性肝炎及肝硬化，不合格。第八条：恶性肿瘤，不合格。肝血管瘤是一种较为常见的肝脏良性肿瘤，既不属于急慢性肝炎也不属于恶性肿瘤，符合体检标准。
肝血管瘤怎么样传染呢？	肝血管瘤作为一种良性肿瘤，大多无症状，且无恶变倾向，发病机制与血小板与内皮细胞的关系有关，不具有传染性。
肝血管瘤具有传染性吗？	肝血管瘤作为一种良性肿瘤，大多无症状，且无恶变倾向，发病机制与血小板与内皮细胞的关系有关，不具有传染性。
肝血管瘤传染注意什么？	肝血管瘤作为一种良性肿瘤，大多无症状，且无恶变倾向，发病机制与血小板与内皮细胞的关系有关，不具有传染性。
您好，请问肝上长个血管瘤会传染吗	肝血管瘤作为一种良性肿瘤，大多无症状，且无恶变倾向，发病机制与血小板与内皮细胞的关系有关，不具有传染性。
肝血管瘤会传染吗？	肝血管瘤作为一种良性肿瘤，大多无症状，且无恶变倾向，发病机制与血小板与内皮细胞的关系有关，不具有传染性。
患了肝血管瘤会传染给其他人吗？	肝血管瘤作为一种良性肿瘤，大多无症状，且无恶变倾向，发病机制与血小板与内皮细胞的关系有关，不具有传染性。
肝血管瘤会不会传染给其他人？	肝血管瘤作为一种良性肿瘤，大多无症状，且无恶变倾向，发病机制与血小板与内皮细胞的关系有关，不具有传染性。
肝血管瘤是传染病症吗？	肝血管瘤作为一种良性肿瘤，大多无症状，且无恶变倾向，发病机制与血小板与内皮细胞的关系有关，不具有传染性。
肝血管瘤会不会遗传吗？	肝血管瘤作为一种良性肿瘤，大多无症状，且无恶变倾向，发病机制与血小板与内皮细胞的关系有关，在人群中多散发，并没有明显遗传性。
肝血管瘤会遗传么	肝血管瘤作为一种良性肿瘤，大多无症状，且无恶变倾向，发病机制与血小板与内皮细胞的关系有关，在人群中多散发，并没有明显遗传性。
可能有四到五年了，肝血管瘤做手术要多少钱	肝血管瘤作为一种良性肿瘤，大多无症状，且无恶变倾向，原则上以随访观察为主。这是目前国内外普遍接受的观念。当血管瘤较大且合并危险因素时，建议酌情治疗。肝血管瘤的治疗方法有手术治疗、局部消融术、肝动脉介入栓塞术。这些方法都有相应的适应症和禁忌症，具体费用根据患者患者就诊医院、住院情况、身体条件、术中药物器材等、术后恢复等情况决定。
肝血管瘤手术大概需要多少钱？	肝血管瘤作为一种良性肿瘤，大多无症状，且无恶变倾向，原则上以随访观察为主。这是目前国内外普遍接受的观念。当血管瘤较大且合并危险因素时，建议酌情治疗。肝血管瘤的治疗方法有手术治疗、局部消融术、肝动脉介入栓塞术。这些方法都有相应的适应症和禁忌症，具体费用根据患者患者就诊医院、住院情况、身体条件、术中药物器材等、术后恢复等情况决定。
肝血管瘤9cm手术多少钱？	肝血管瘤作为一种良性肿瘤，大多无症状，且无恶变倾向，原则上以随访观察为主。这是目前国内外普遍接受的观念。当血管瘤较大且合并危险因素时，建议酌情治疗。肝血管瘤的治疗方法有手术治疗、局部消融术、肝动脉介入栓塞术。这些方法都有相应的适应症和禁忌症，具体费用根据患者患者就诊医院、住院情况、身体条件、术中药物器材等、术后恢复等情况决定。
肝血管瘤7cm手术多少钱？	肝血管瘤作为一种良性肿瘤，大多无症状，且无恶变倾向，原则上以随访观察为主。这是目前国内外普遍接受的观念。当血管瘤较大且合并危险因素时，建议酌情治疗。肝血管瘤的治疗方法有手术治疗、局部消融术、肝动脉介入栓塞术。这些方法都有相应的适应症和禁忌症，具体费用根据患者患者就诊医院、住院情况、身体条件、术中药物器材等、术后恢复等情况决定。
肝血管瘤手术费用	肝血管瘤作为一种良性肿瘤，大多无症状，且无恶变倾向，原则上以随访观察为主。这是目前国内外普遍接受的观念。当血管瘤较大且合并危险因素时，建议酌情治疗。肝血管瘤的治疗方法有手术治疗、局部消融术、肝动脉介入栓塞术。这些方法都有相应的适应症和禁忌症，具体费用根据患者患者就诊医院、住院情况、身体条件、术中药物器材等、术后恢复等情况决定。
肝血管瘤6.04.5做手术得多少钱	肝血管瘤作为一种良性肿瘤，大多无症状，且无恶变倾向，原则上以随访观察为主。这是目前国内外普遍接受的观念。当血管瘤较大且合并危险因素时，建议酌情治疗。肝血管瘤的治疗方法有手术治疗、局部消融术、肝动脉介入栓塞术。这些方法都有相应的适应症和禁忌症，具体费用根据患者患者就诊医院、住院情况、身体条件、术中药物器材等、术后恢复等情况决定。
肝血管瘤治疗要多少钱	肝血管瘤作为一种良性肿瘤，大多无症状，且无恶变倾向，原则上以随访观察为主。这是目前国内外普遍接受的观念。当血管瘤较大且合并危险因素时，建议酌情治疗。肝血管瘤的治疗方法有手术治疗、局部消融术、肝动脉介入栓塞术。这些方法都有相应的适应症和禁忌症，具体费用根据患者患者就诊医院、住院情况、身体条件、术中药物器材等、术后恢复等情况决定。
肝血管瘤的治疗费用一般要多少	肝血管瘤作为一种良性肿瘤，大多无症状，且无恶变倾向，原则上以随访观察为主。这是目前国内外普遍接受的观念。当血管瘤较大且合并危险因素时，建议酌情治疗。肝血管瘤的治疗方法有手术治疗、局部消融术、肝动脉介入栓塞术。这些方法都有相应的适应症和禁忌症，具体费用根据患者患者就诊医院、住院情况、身体条件、术中药物器材等、术后恢复等情况决定。
肝血管瘤手术需要多少费用？	肝血管瘤作为一种良性肿瘤，大多无症状，且无恶变倾向，原则上以随访观察为主。这是目前国内外普遍接受的观念。当血管瘤较大且合并危险因素时，建议酌情治疗。肝血管瘤的治疗方法有手术治疗、局部消融术、肝动脉介入栓塞术。这些方法都有相应的适应症和禁忌症，具体费用根据患者患者就诊医院、住院情况、身体条件、术中药物器材等、术后恢复等情况决定。
肝部血管瘤微创手术多少钱？	肝血管瘤作为一种良性肿瘤，大多无症状，且无恶变倾向，原则上以随访观察为主。这是目前国内外普遍接受的观念。当血管瘤较大且合并危险因素时，建议酌情治疗。肝血管瘤的治疗方法有手术治疗、局部消融术、肝动脉介入栓塞术。这些方法都有相应的适应症和禁忌症，具体费用根据患者患者就诊医院、住院情况、身体条件、术中药物器材等、术后恢复等情况决定。
5厘米肝血管瘤能做微创手术吗？手术要多少钱	肝血管瘤作为一种良性肿瘤，大多无症状，且无恶变倾向，原则上以随访观察为主。这是目前国内外普遍接受的观念。当血管瘤较大且合并危险因素时，建议酌情治疗。肝血管瘤的治疗方法有手术治疗、局部消融术、肝动脉介入栓塞术。这些方法都有相应的适应症和禁忌症，具体费用根据患者患者就诊医院、住院情况、身体条件、术中药物器材等、术后恢复等情况决定。
多发性肝血管瘤能导致贫血吗	贫血可分为造血不良性、失血性和溶血性，可能的病因有血红蛋白合成障碍、失血性贫血等。少数肝血管瘤的患者可能因为肿瘤内有血栓形成或坏死，导致发热及全身消耗性凝血等严重并发症。这种情况下可能出现贫血，建议到正规医院就诊查明贫血病因，及时对症治疗。
肝血管瘤多发肝囊肿怎么治疗？	肝囊肿是肝血管瘤常见合并症之一，约10%的肝血管瘤患者可并发肝囊肿。肝囊肿多为先天性原因所导致，由胚胎时期胆管发育异常造成。小部分肝囊肿由创伤和炎症所致。肝血管瘤合并肝囊肿患者若无症状可以定期门诊随访观察，若出现伴发症状或者出现严重并发症的患者可以手术，如腹痛、临近器官受压、血小板异常消耗或肝功能受其影响。肝血管瘤生长速度明显的血管瘤也推荐手术治疗。
肝血管瘤术后伤口里面疼的原因	肝血管瘤手术后切口处疼痛可能是术后切口恢复不良，也可能是肝脏术后出现一些其它病因。建议到正规医院就诊查明病因，及时对症支持治疗。
肝血管瘤介入手术做了一年多了为什么还痛，并且长大了	肝动脉介入栓塞术具有创伤小、花费少、术后恢复快等优点，近期疗效比较确切，但远期复发率相对较高。建议到正规医院就诊，完善CT、MRI等相关检查，查明患者疼痛原因，评估患者病情，必要时多学科会诊，决定进一步诊治方案。
肝血管瘤手术后胃也不好了？	肝血管瘤手术是有风险的，术后人处于应激状态可能会出现胃肠道出血、应激性溃疡等情况。此外如果术中损伤胃或肠道时可能对消化道有一定影响，建议到正规医院就诊查明消化道不适病因，及时对症治疗。
肝血管瘤介入手术后疼痛难耐，有什么方法缓解吗	肝动脉介入栓塞术是有风险的治疗方法。包括异位栓塞导致各种并发症的发生、术后感染、肝区疼痛加重介入术后可能出现恶心，呕吐，腹胀，发热（37.5～38.5℃）等症状，建议到正规医院就诊查明疼痛原因，可遵医嘱予止疼治疗。
做玩肝血管瘤会引起头晕吗？	头晕可能的病因可能是神经系统病变、内科疾病、贫血、脑动脉硬化、心脏病、冠心病、功能性低血糖等，肝血管瘤手术后出现头晕可能是术后营养不足或是出现心脑血管改变引起的，建议到正规医院就诊查明头晕原因，及时对症治疗。
有大三阳和肝血管瘤严重吗	肝血管瘤作为一种良性肿瘤，大多无症状，且无恶变倾向，原则上以随访观察为主。这是目前国内外普遍接受的观念。当血管瘤较大且合并危险因素时，建议酌情治疗。若合并乙型病毒性肝炎，建议定期复查，遵医嘱治疗乙型病毒性肝炎，同时完善CT、MRI等辅助检查，明确诊断，再决定进一步诊治方案。
得了肝血管瘤直径4.5公分要不要做手术呀	肝血管瘤作为一种较为常见的肝良性肿瘤。手术切除治疗肝血管瘤是目前认为最为确切的治疗手段，但应严格把握切除指征，对于无症状，但强烈要求手术治疗的病人不推荐手术。瘤体小于10cm一般不需要手术，定期门诊随访观察；大于10cm的肝血管瘤一般需手术切除。此外，伴发症状或者出现严重并发症的肝血管瘤可以手术，如腹痛、临近器官受压、血小板异常消耗或肝功能受其影响。肝血管瘤生长速度明显的血管瘤也推荐手术治疗。青年女性患有巨大肝血管瘤也可手术切除，这是因为肝血管瘤具有在妊娠期瘤体生长增大的特点和分娩时可能破裂大出血引发生命危险。对从事剧烈活动的职业或爱好者，如足球、篮球、拳击等，可能招致肝外伤的巨大肝血管瘤患者，也可以考虑手术切除。
得了肝血管瘤怎么办，一定要开刀做手术吗	肝血管瘤作为一种较为常见的肝良性肿瘤。手术切除治疗肝血管瘤是目前认为最为确切的治疗手段，但应严格把握切除指征，对于无症状，但强烈要求手术治疗的病人不推荐手术。瘤体小于10cm一般不需要手术，定期门诊随访观察；大于10cm的肝血管瘤一般需手术切除。此外，伴发症状或者出现严重并发症的肝血管瘤可以手术，如腹痛、临近器官受压、血小板异常消耗或肝功能受其影响。肝血管瘤生长速度明显的血管瘤也推荐手术治疗。青年女性患有巨大肝血管瘤也可手术切除，这是因为肝血管瘤具有在妊娠期瘤体生长增大的特点和分娩时可能破裂大出血引发生命危险。对从事剧烈活动的职业或爱好者，如足球、篮球、拳击等，可能招致肝外伤的巨大肝血管瘤患者，也可以考虑手术切除。
肝上有血管瘤大于5cm就必须要手术治疗？	肝血管瘤作为一种较为常见的肝良性肿瘤。手术切除治疗肝血管瘤是目前认为最为确切的治疗手段，但应严格把握切除指征，对于无症状，但强烈要求手术治疗的病人不推荐手术。瘤体小于10cm一般不需要手术，定期门诊随访观察；大于10cm的肝血管瘤一般需手术切除。此外，伴发症状或者出现严重并发症的肝血管瘤可以手术，如腹痛、临近器官受压、血小板异常消耗或肝功能受其影响。肝血管瘤生长速度明显的血管瘤也推荐手术治疗。青年女性患有巨大肝血管瘤也可手术切除，这是因为肝血管瘤具有在妊娠期瘤体生长增大的特点和分娩时可能破裂大出血引发生命危险。对从事剧烈活动的职业或爱好者，如足球、篮球、拳击等，可能招致肝外伤的巨大肝血管瘤患者，也可以考虑手术切除。
肝血管瘤需要手术吗？	肝血管瘤作为一种较为常见的肝良性肿瘤。手术切除治疗肝血管瘤是目前认为最为确切的治疗手段，但应严格把握切除指征，对于无症状，但强烈要求手术治疗的病人不推荐手术。瘤体小于10cm一般不需要手术，定期门诊随访观察；大于10cm的肝血管瘤一般需手术切除。此外，伴发症状或者出现严重并发症的肝血管瘤可以手术，如腹痛、临近器官受压、血小板异常消耗或肝功能受其影响。肝血管瘤生长速度明显的血管瘤也推荐手术治疗。青年女性患有巨大肝血管瘤也可手术切除，这是因为肝血管瘤具有在妊娠期瘤体生长增大的特点和分娩时可能破裂大出血引发生命危险。对从事剧烈活动的职业或爱好者，如足球、篮球、拳击等，可能招致肝外伤的巨大肝血管瘤患者，也可以考虑手术切除。
肝血管瘤，超过5公分大，需要手术吗？	肝血管瘤作为一种较为常见的肝良性肿瘤。手术切除治疗肝血管瘤是目前认为最为确切的治疗手段，但应严格把握切除指征，对于无症状，但强烈要求手术治疗的病人不推荐手术。瘤体小于10cm一般不需要手术，定期门诊随访观察；大于10cm的肝血管瘤一般需手术切除。此外，伴发症状或者出现严重并发症的肝血管瘤可以手术，如腹痛、临近器官受压、血小板异常消耗或肝功能受其影响。肝血管瘤生长速度明显的血管瘤也推荐手术治疗。青年女性患有巨大肝血管瘤也可手术切除，这是因为肝血管瘤具有在妊娠期瘤体生长增大的特点和分娩时可能破裂大出血引发生命危险。对从事剧烈活动的职业或爱好者，如足球、篮球、拳击等，可能招致肝外伤的巨大肝血管瘤患者，也可以考虑手术切除。
肝血管瘤8厘米需要手术吗	肝血管瘤作为一种较为常见的肝良性肿瘤。手术切除治疗肝血管瘤是目前认为最为确切的治疗手段，但应严格把握切除指征，对于无症状，但强烈要求手术治疗的病人不推荐手术。瘤体小于10cm一般不需要手术，定期门诊随访观察；大于10cm的肝血管瘤一般需手术切除。此外，伴发症状或者出现严重并发症的肝血管瘤可以手术，如腹痛、临近器官受压、血小板异常消耗或肝功能受其影响。肝血管瘤生长速度明显的血管瘤也推荐手术治疗。青年女性患有巨大肝血管瘤也可手术切除，这是因为肝血管瘤具有在妊娠期瘤体生长增大的特点和分娩时可能破裂大出血引发生命危险。对从事剧烈活动的职业或爱好者，如足球、篮球、拳击等，可能招致肝外伤的巨大肝血管瘤患者，也可以考虑手术切除。
肝血管瘤必须手术吗	肝血管瘤作为一种较为常见的肝良性肿瘤。手术切除治疗肝血管瘤是目前认为最为确切的治疗手段，但应严格把握切除指征，对于无症状，但强烈要求手术治疗的病人不推荐手术。瘤体小于10cm一般不需要手术，定期门诊随访观察；大于10cm的肝血管瘤一般需手术切除。此外，伴发症状或者出现严重并发症的肝血管瘤可以手术，如腹痛、临近器官受压、血小板异常消耗或肝功能受其影响。肝血管瘤生长速度明显的血管瘤也推荐手术治疗。青年女性患有巨大肝血管瘤也可手术切除，这是因为肝血管瘤具有在妊娠期瘤体生长增大的特点和分娩时可能破裂大出血引发生命危险。对从事剧烈活动的职业或爱好者，如足球、篮球、拳击等，可能招致肝外伤的巨大肝血管瘤患者，也可以考虑手术切除。
肝血管瘤直径5厘米，不做手术可以吗？	肝血管瘤作为一种较为常见的肝良性肿瘤。手术切除治疗肝血管瘤是目前认为最为确切的治疗手段，但应严格把握切除指征，对于无症状，但强烈要求手术治疗的病人不推荐手术。瘤体小于10cm一般不需要手术，定期门诊随访观察；大于10cm的肝血管瘤一般需手术切除。此外，伴发症状或者出现严重并发症的肝血管瘤可以手术，如腹痛、临近器官受压、血小板异常消耗或肝功能受其影响。肝血管瘤生长速度明显的血管瘤也推荐手术治疗。青年女性患有巨大肝血管瘤也可手术切除，这是因为肝血管瘤具有在妊娠期瘤体生长增大的特点和分娩时可能破裂大出血引发生命危险。对从事剧烈活动的职业或爱好者，如足球、篮球、拳击等，可能招致肝外伤的巨大肝血管瘤患者，也可以考虑手术切除。
肝血管瘤长到多大可做手术？	肝血管瘤作为一种较为常见的肝良性肿瘤。手术切除治疗肝血管瘤是目前认为最为确切的治疗手段，但应严格把握切除指征，对于无症状，但强烈要求手术治疗的病人不推荐手术。瘤体小于10cm一般不需要手术，定期门诊随访观察；大于10cm的肝血管瘤一般需手术切除。此外，伴发症状或者出现严重并发症的肝血管瘤可以手术，如腹痛、临近器官受压、血小板异常消耗或肝功能受其影响。肝血管瘤生长速度明显的血管瘤也推荐手术治疗。青年女性患有巨大肝血管瘤也可手术切除，这是因为肝血管瘤具有在妊娠期瘤体生长增大的特点和分娩时可能破裂大出血引发生命危险。对从事剧烈活动的职业或爱好者，如足球、篮球、拳击等，可能招致肝外伤的巨大肝血管瘤患者，也可以考虑手术切除。
肝上长了一个8*7.8CM的血管瘤，手术有危险吗	肝血管瘤作为一种较为常见的肝良性肿瘤。手术切除治疗肝血管瘤是目前认为最为确切的治疗手段，但应严格把握切除指征，对于无症状，但强烈要求手术治疗的病人不推荐手术。瘤体小于10cm一般不需要手术，定期门诊随访观察；大于10cm的肝血管瘤一般需手术切除。此外，伴发症状或者出现严重并发症的肝血管瘤可以手术，如腹痛、临近器官受压、血小板异常消耗或肝功能受其影响。肝血管瘤生长速度明显的血管瘤也推荐手术治疗。青年女性患有巨大肝血管瘤也可手术切除，这是因为肝血管瘤具有在妊娠期瘤体生长增大的特点和分娩时可能破裂大出血引发生命危险。对从事剧烈活动的职业或爱好者，如足球、篮球、拳击等，可能招致肝外伤的巨大肝血管瘤患者，也可以考虑手术切除。
肝血管瘤5.3cm，请问需要手术吗	肝血管瘤作为一种较为常见的肝良性肿瘤。手术切除治疗肝血管瘤是目前认为最为确切的治疗手段，但应严格把握切除指征，对于无症状，但强烈要求手术治疗的病人不推荐手术。瘤体小于10cm一般不需要手术，定期门诊随访观察；大于10cm的肝血管瘤一般需手术切除。此外，伴发症状或者出现严重并发症的肝血管瘤可以手术，如腹痛、临近器官受压、血小板异常消耗或肝功能受其影响。肝血管瘤生长速度明显的血管瘤也推荐手术治疗。青年女性患有巨大肝血管瘤也可手术切除，这是因为肝血管瘤具有在妊娠期瘤体生长增大的特点和分娩时可能破裂大出血引发生命危险。对从事剧烈活动的职业或爱好者，如足球、篮球、拳击等，可能招致肝外伤的巨大肝血管瘤患者，也可以考虑手术切除。
肝血管瘤50mm*52mm需要动手术吗？	肝血管瘤作为一种较为常见的肝良性肿瘤。手术切除治疗肝血管瘤是目前认为最为确切的治疗手段，但应严格把握切除指征，对于无症状，但强烈要求手术治疗的病人不推荐手术。瘤体小于10cm一般不需要手术，定期门诊随访观察；大于10cm的肝血管瘤一般需手术切除。此外，伴发症状或者出现严重并发症的肝血管瘤可以手术，如腹痛、临近器官受压、血小板异常消耗或肝功能受其影响。肝血管瘤生长速度明显的血管瘤也推荐手术治疗。青年女性患有巨大肝血管瘤也可手术切除，这是因为肝血管瘤具有在妊娠期瘤体生长增大的特点和分娩时可能破裂大出血引发生命危险。对从事剧烈活动的职业或爱好者，如足球、篮球、拳击等，可能招致肝外伤的巨大肝血管瘤患者，也可以考虑手术切除。
肝血管瘤8cm左右，手术有没有危险，需要注意什么	肝血管瘤作为一种较为常见的肝良性肿瘤。手术切除治疗肝血管瘤是目前认为最为确切的治疗手段，但应严格把握切除指征，对于无症状，但强烈要求手术治疗的病人不推荐手术。瘤体小于10cm一般不需要手术，定期门诊随访观察；大于10cm的肝血管瘤一般需手术切除。此外，伴发症状或者出现严重并发症的肝血管瘤可以手术，如腹痛、临近器官受压、血小板异常消耗或肝功能受其影响。肝血管瘤生长速度明显的血管瘤也推荐手术治疗。青年女性患有巨大肝血管瘤也可手术切除，这是因为肝血管瘤具有在妊娠期瘤体生长增大的特点和分娩时可能破裂大出血引发生命危险。对从事剧烈活动的职业或爱好者，如足球、篮球、拳击等，可能招致肝外伤的巨大肝血管瘤患者，也可以考虑手术切除。
肝血管瘤八公分手术要切肝吗？	肝血管瘤作为一种较为常见的肝良性肿瘤。手术切除治疗肝血管瘤是目前认为最为确切的治疗手段，但应严格把握切除指征，对于无症状，但强烈要求手术治疗的病人不推荐手术。瘤体小于10cm一般不需要手术，定期门诊随访观察；大于10cm的肝血管瘤一般需手术切除。此外，伴发症状或者出现严重并发症的肝血管瘤可以手术，如腹痛、临近器官受压、血小板异常消耗或肝功能受其影响。肝血管瘤生长速度明显的血管瘤也推荐手术治疗。青年女性患有巨大肝血管瘤也可手术切除，这是因为肝血管瘤具有在妊娠期瘤体生长增大的特点和分娩时可能破裂大出血引发生命危险。对从事剧烈活动的职业或爱好者，如足球、篮球、拳击等，可能招致肝外伤的巨大肝血管瘤患者，也可以考虑手术切除。
肝血管瘤做手术怎么样呢	肝血管瘤作为一种较为常见的肝良性肿瘤。手术切除治疗肝血管瘤是目前认为最为确切的治疗手段，但应严格把握切除指征，对于无症状，但强烈要求手术治疗的病人不推荐手术。瘤体小于10cm一般不需要手术，定期门诊随访观察；大于10cm的肝血管瘤一般需手术切除。此外，伴发症状或者出现严重并发症的肝血管瘤可以手术，如腹痛、临近器官受压、血小板异常消耗或肝功能受其影响。肝血管瘤生长速度明显的血管瘤也推荐手术治疗。青年女性患有巨大肝血管瘤也可手术切除，这是因为肝血管瘤具有在妊娠期瘤体生长增大的特点和分娩时可能破裂大出血引发生命危险。对从事剧烈活动的职业或爱好者，如足球、篮球、拳击等，可能招致肝外伤的巨大肝血管瘤患者，也可以考虑手术切除。
肝血管瘤多大需要手术，手术费是多少	肝血管瘤作为一种较为常见的肝良性肿瘤。手术切除治疗肝血管瘤是目前认为最为确切的治疗手段，但应严格把握切除指征，对于无症状，但强烈要求手术治疗的病人不推荐手术。瘤体小于10cm一般不需要手术，定期门诊随访观察；大于10cm的肝血管瘤一般需手术切除。此外，伴发症状或者出现严重并发症的肝血管瘤可以手术，如腹痛、临近器官受压、血小板异常消耗或肝功能受其影响。肝血管瘤生长速度明显的血管瘤也推荐手术治疗。青年女性患有巨大肝血管瘤也可手术切除，这是因为肝血管瘤具有在妊娠期瘤体生长增大的特点和分娩时可能破裂大出血引发生命危险。对从事剧烈活动的职业或爱好者，如足球、篮球、拳击等，可能招致肝外伤的巨大肝血管瘤患者，也可以考虑手术切除。
肝血管瘤多大需要手术？	肝血管瘤作为一种较为常见的肝良性肿瘤。手术切除治疗肝血管瘤是目前认为最为确切的治疗手段，但应严格把握切除指征，对于无症状，但强烈要求手术治疗的病人不推荐手术。瘤体小于10cm一般不需要手术，定期门诊随访观察；大于10cm的肝血管瘤一般需手术切除。此外，伴发症状或者出现严重并发症的肝血管瘤可以手术，如腹痛、临近器官受压、血小板异常消耗或肝功能受其影响。肝血管瘤生长速度明显的血管瘤也推荐手术治疗。青年女性患有巨大肝血管瘤也可手术切除，这是因为肝血管瘤具有在妊娠期瘤体生长增大的特点和分娩时可能破裂大出血引发生命危险。对从事剧烈活动的职业或爱好者，如足球、篮球、拳击等，可能招致肝外伤的巨大肝血管瘤患者，也可以考虑手术切除。
肝血管瘤肝血管瘤超过五厘米了，请问医生必须要做手术吗	肝血管瘤作为一种较为常见的肝良性肿瘤。手术切除治疗肝血管瘤是目前认为最为确切的治疗手段，但应严格把握切除指征，对于无症状，但强烈要求手术治疗的病人不推荐手术。瘤体小于10cm一般不需要手术，定期门诊随访观察；大于10cm的肝血管瘤一般需手术切除。此外，伴发症状或者出现严重并发症的肝血管瘤可以手术，如腹痛、临近器官受压、血小板异常消耗或肝功能受其影响。肝血管瘤生长速度明显的血管瘤也推荐手术治疗。青年女性患有巨大肝血管瘤也可手术切除，这是因为肝血管瘤具有在妊娠期瘤体生长增大的特点和分娩时可能破裂大出血引发生命危险。对从事剧烈活动的职业或爱好者，如足球、篮球、拳击等，可能招致肝外伤的巨大肝血管瘤患者，也可以考虑手术切除。
肝脏上长了7厘米大小的血管瘤要做手术吗	肝血管瘤作为一种较为常见的肝良性肿瘤。手术切除治疗肝血管瘤是目前认为最为确切的治疗手段，但应严格把握切除指征，对于无症状，但强烈要求手术治疗的病人不推荐手术。瘤体小于10cm一般不需要手术，定期门诊随访观察；大于10cm的肝血管瘤一般需手术切除。此外，伴发症状或者出现严重并发症的肝血管瘤可以手术，如腹痛、临近器官受压、血小板异常消耗或肝功能受其影响。肝血管瘤生长速度明显的血管瘤也推荐手术治疗。青年女性患有巨大肝血管瘤也可手术切除，这是因为肝血管瘤具有在妊娠期瘤体生长增大的特点和分娩时可能破裂大出血引发生命危险。对从事剧烈活动的职业或爱好者，如足球、篮球、拳击等，可能招致肝外伤的巨大肝血管瘤患者，也可以考虑手术切除。
肝血管瘤可以不手术治疗不？	肝血管瘤作为一种较为常见的肝良性肿瘤。手术切除治疗肝血管瘤是目前认为最为确切的治疗手段，但应严格把握切除指征，对于无症状，但强烈要求手术治疗的病人不推荐手术。瘤体小于10cm一般不需要手术，定期门诊随访观察；大于10cm的肝血管瘤一般需手术切除。此外，伴发症状或者出现严重并发症的肝血管瘤可以手术，如腹痛、临近器官受压、血小板异常消耗或肝功能受其影响。肝血管瘤生长速度明显的血管瘤也推荐手术治疗。青年女性患有巨大肝血管瘤也可手术切除，这是因为肝血管瘤具有在妊娠期瘤体生长增大的特点和分娩时可能破裂大出血引发生命危险。对从事剧烈活动的职业或爱好者，如足球、篮球、拳击等，可能招致肝外伤的巨大肝血管瘤患者，也可以考虑手术切除。
肝血管瘤已长到8厘米*7厘米，请问怎样治疗为好？	肝血管瘤作为一种较为常见的肝良性肿瘤。手术切除治疗肝血管瘤是目前认为最为确切的治疗手段，但应严格把握切除指征，对于无症状，但强烈要求手术治疗的病人不推荐手术。瘤体小于10cm一般不需要手术，定期门诊随访观察；大于10cm的肝血管瘤一般需手术切除。此外，伴发症状或者出现严重并发症的肝血管瘤可以手术，如腹痛、临近器官受压、血小板异常消耗或肝功能受其影响。肝血管瘤生长速度明显的血管瘤也推荐手术治疗。青年女性患有巨大肝血管瘤也可手术切除，这是因为肝血管瘤具有在妊娠期瘤体生长增大的特点和分娩时可能破裂大出血引发生命危险。对从事剧烈活动的职业或爱好者，如足球、篮球、拳击等，可能招致肝外伤的巨大肝血管瘤患者，也可以考虑手术切除。
肝血管瘤什么情况下必须切除？	肝血管瘤作为一种较为常见的肝良性肿瘤。手术切除治疗肝血管瘤是目前认为最为确切的治疗手段，但应严格把握切除指征，对于无症状，但强烈要求手术治疗的病人不推荐手术。瘤体小于10cm一般不需要手术，定期门诊随访观察；大于10cm的肝血管瘤一般需手术切除。此外，伴发症状或者出现严重并发症的肝血管瘤可以手术，如腹痛、临近器官受压、血小板异常消耗或肝功能受其影响。肝血管瘤生长速度明显的血管瘤也推荐手术治疗。青年女性患有巨大肝血管瘤也可手术切除，这是因为肝血管瘤具有在妊娠期瘤体生长增大的特点和分娩时可能破裂大出血引发生命危险。对从事剧烈活动的职业或爱好者，如足球、篮球、拳击等，可能招致肝外伤的巨大肝血管瘤患者，也可以考虑手术切除。
肝血管瘤什么时候做手术最好？	肝血管瘤作为一种较为常见的肝良性肿瘤。手术切除治疗肝血管瘤是目前认为最为确切的治疗手段，但应严格把握切除指征，对于无症状，但强烈要求手术治疗的病人不推荐手术。瘤体小于10cm一般不需要手术，定期门诊随访观察；大于10cm的肝血管瘤一般需手术切除。此外，伴发症状或者出现严重并发症的肝血管瘤可以手术，如腹痛、临近器官受压、血小板异常消耗或肝功能受其影响。肝血管瘤生长速度明显的血管瘤也推荐手术治疗。青年女性患有巨大肝血管瘤也可手术切除，这是因为肝血管瘤具有在妊娠期瘤体生长增大的特点和分娩时可能破裂大出血引发生命危险。对从事剧烈活动的职业或爱好者，如足球、篮球、拳击等，可能招致肝外伤的巨大肝血管瘤患者，也可以考虑手术切除。
肝脏血管瘤6CM-5CM怎么个治疗？	肝血管瘤作为一种较为常见的肝良性肿瘤。手术切除治疗肝血管瘤是目前认为最为确切的治疗手段，但应严格把握切除指征，对于无症状，但强烈要求手术治疗的病人不推荐手术。瘤体小于10cm一般不需要手术，定期门诊随访观察；大于10cm的肝血管瘤一般需手术切除。此外，伴发症状或者出现严重并发症的肝血管瘤可以手术，如腹痛、临近器官受压、血小板异常消耗或肝功能受其影响。肝血管瘤生长速度明显的血管瘤也推荐手术治疗。青年女性患有巨大肝血管瘤也可手术切除，这是因为肝血管瘤具有在妊娠期瘤体生长增大的特点和分娩时可能破裂大出血引发生命危险。对从事剧烈活动的职业或爱好者，如足球、篮球、拳击等，可能招致肝外伤的巨大肝血管瘤患者，也可以考虑手术切除。
肝脏血管瘤7CM用手术吗？手术费用多少？	肝血管瘤作为一种较为常见的肝良性肿瘤。手术切除治疗肝血管瘤是目前认为最为确切的治疗手段，但应严格把握切除指征，对于无症状，但强烈要求手术治疗的病人不推荐手术。瘤体小于10cm一般不需要手术，定期门诊随访观察；大于10cm的肝血管瘤一般需手术切除。此外，伴发症状或者出现严重并发症的肝血管瘤可以手术，如腹痛、临近器官受压、血小板异常消耗或肝功能受其影响。肝血管瘤生长速度明显的血管瘤也推荐手术治疗。青年女性患有巨大肝血管瘤也可手术切除，这是因为肝血管瘤具有在妊娠期瘤体生长增大的特点和分娩时可能破裂大出血引发生命危险。对从事剧烈活动的职业或爱好者，如足球、篮球、拳击等，可能招致肝外伤的巨大肝血管瘤患者，也可以考虑手术切除。
肝脏血管瘤可以手术吗？	肝血管瘤作为一种较为常见的肝良性肿瘤。手术切除治疗肝血管瘤是目前认为最为确切的治疗手段，但应严格把握切除指征，对于无症状，但强烈要求手术治疗的病人不推荐手术。瘤体小于10cm一般不需要手术，定期门诊随访观察；大于10cm的肝血管瘤一般需手术切除。此外，伴发症状或者出现严重并发症的肝血管瘤可以手术，如腹痛、临近器官受压、血小板异常消耗或肝功能受其影响。肝血管瘤生长速度明显的血管瘤也推荐手术治疗。青年女性患有巨大肝血管瘤也可手术切除，这是因为肝血管瘤具有在妊娠期瘤体生长增大的特点和分娩时可能破裂大出血引发生命危险。对从事剧烈活动的职业或爱好者，如足球、篮球、拳击等，可能招致肝外伤的巨大肝血管瘤患者，也可以考虑手术切除。
肝脏血管瘤要开刀吗？	肝血管瘤作为一种较为常见的肝良性肿瘤。手术切除治疗肝血管瘤是目前认为最为确切的治疗手段，但应严格把握切除指征，对于无症状，但强烈要求手术治疗的病人不推荐手术。瘤体小于10cm一般不需要手术，定期门诊随访观察；大于10cm的肝血管瘤一般需手术切除。此外，伴发症状或者出现严重并发症的肝血管瘤可以手术，如腹痛、临近器官受压、血小板异常消耗或肝功能受其影响。肝血管瘤生长速度明显的血管瘤也推荐手术治疗。青年女性患有巨大肝血管瘤也可手术切除，这是因为肝血管瘤具有在妊娠期瘤体生长增大的特点和分娩时可能破裂大出血引发生命危险。对从事剧烈活动的职业或爱好者，如足球、篮球、拳击等，可能招致肝外伤的巨大肝血管瘤患者，也可以考虑手术切除。
肝脏血管瘤在那些情况下需要手术？	肝血管瘤作为一种较为常见的肝良性肿瘤。手术切除治疗肝血管瘤是目前认为最为确切的治疗手段，但应严格把握切除指征，对于无症状，但强烈要求手术治疗的病人不推荐手术。瘤体小于10cm一般不需要手术，定期门诊随访观察；大于10cm的肝血管瘤一般需手术切除。此外，伴发症状或者出现严重并发症的肝血管瘤可以手术，如腹痛、临近器官受压、血小板异常消耗或肝功能受其影响。肝血管瘤生长速度明显的血管瘤也推荐手术治疗。青年女性患有巨大肝血管瘤也可手术切除，这是因为肝血管瘤具有在妊娠期瘤体生长增大的特点和分娩时可能破裂大出血引发生命危险。对从事剧烈活动的职业或爱好者，如足球、篮球、拳击等，可能招致肝外伤的巨大肝血管瘤患者，也可以考虑手术切除。
肝脏右后叶有血管瘤多大需要手术	肝血管瘤作为一种较为常见的肝良性肿瘤。手术切除治疗肝血管瘤是目前认为最为确切的治疗手段，但应严格把握切除指征，对于无症状，但强烈要求手术治疗的病人不推荐手术。瘤体小于10cm一般不需要手术，定期门诊随访观察；大于10cm的肝血管瘤一般需手术切除。此外，伴发症状或者出现严重并发症的肝血管瘤可以手术，如腹痛、临近器官受压、血小板异常消耗或肝功能受其影响。肝血管瘤生长速度明显的血管瘤也推荐手术治疗。青年女性患有巨大肝血管瘤也可手术切除，这是因为肝血管瘤具有在妊娠期瘤体生长增大的特点和分娩时可能破裂大出血引发生命危险。对从事剧烈活动的职业或爱好者，如足球、篮球、拳击等，可能招致肝外伤的巨大肝血管瘤患者，也可以考虑手术切除。
你话我是肝上血管瘤4，8＊7，3需要手术吗	肝血管瘤作为一种较为常见的肝良性肿瘤。手术切除治疗肝血管瘤是目前认为最为确切的治疗手段，但应严格把握切除指征，对于无症状，但强烈要求手术治疗的病人不推荐手术。瘤体小于10cm一般不需要手术，定期门诊随访观察；大于10cm的肝血管瘤一般需手术切除。此外，伴发症状或者出现严重并发症的肝血管瘤可以手术，如腹痛、临近器官受压、血小板异常消耗或肝功能受其影响。肝血管瘤生长速度明显的血管瘤也推荐手术治疗。青年女性患有巨大肝血管瘤也可手术切除，这是因为肝血管瘤具有在妊娠期瘤体生长增大的特点和分娩时可能破裂大出血引发生命危险。对从事剧烈活动的职业或爱好者，如足球、篮球、拳击等，可能招致肝外伤的巨大肝血管瘤患者，也可以考虑手术切除。
我检查有肝血管瘤大4、5公分，可不可以不做手术？	肝血管瘤作为一种较为常见的肝良性肿瘤。手术切除治疗肝血管瘤是目前认为最为确切的治疗手段，但应严格把握切除指征，对于无症状，但强烈要求手术治疗的病人不推荐手术。瘤体小于10cm一般不需要手术，定期门诊随访观察；大于10cm的肝血管瘤一般需手术切除。此外，伴发症状或者出现严重并发症的肝血管瘤可以手术，如腹痛、临近器官受压、血小板异常消耗或肝功能受其影响。肝血管瘤生长速度明显的血管瘤也推荐手术治疗。青年女性患有巨大肝血管瘤也可手术切除，这是因为肝血管瘤具有在妊娠期瘤体生长增大的特点和分娩时可能破裂大出血引发生命危险。对从事剧烈活动的职业或爱好者，如足球、篮球、拳击等，可能招致肝外伤的巨大肝血管瘤患者，也可以考虑手术切除。
我检查有肝血管瘤大4、5公分，可不可以不做手术？	肝血管瘤作为一种较为常见的肝良性肿瘤。手术切除治疗肝血管瘤是目前认为最为确切的治疗手段，但应严格把握切除指征，对于无症状，但强烈要求手术治疗的病人不推荐手术。瘤体小于10cm一般不需要手术，定期门诊随访观察；大于10cm的肝血管瘤一般需手术切除。此外，伴发症状或者出现严重并发症的肝血管瘤可以手术，如腹痛、临近器官受压、血小板异常消耗或肝功能受其影响。肝血管瘤生长速度明显的血管瘤也推荐手术治疗。青年女性患有巨大肝血管瘤也可手术切除，这是因为肝血管瘤具有在妊娠期瘤体生长增大的特点和分娩时可能破裂大出血引发生命危险。对从事剧烈活动的职业或爱好者，如足球、篮球、拳击等，可能招致肝外伤的巨大肝血管瘤患者，也可以考虑手术切除。
我今天上午B超检查说是肝血管瘤2厘米要不要紧，需不需要手术？	肝血管瘤作为一种较为常见的肝良性肿瘤。手术切除治疗肝血管瘤是目前认为最为确切的治疗手段，但应严格把握切除指征，对于无症状，但强烈要求手术治疗的病人不推荐手术。瘤体小于10cm一般不需要手术，定期门诊随访观察；大于10cm的肝血管瘤一般需手术切除。此外，伴发症状或者出现严重并发症的肝血管瘤可以手术，如腹痛、临近器官受压、血小板异常消耗或肝功能受其影响。肝血管瘤生长速度明显的血管瘤也推荐手术治疗。青年女性患有巨大肝血管瘤也可手术切除，这是因为肝血管瘤具有在妊娠期瘤体生长增大的特点和分娩时可能破裂大出血引发生命危险。对从事剧烈活动的职业或爱好者，如足球、篮球、拳击等，可能招致肝外伤的巨大肝血管瘤患者，也可以考虑手术切除。
我今天上午B超检查说是肝血管瘤2厘米要不要紧，需不需要手术？	肝血管瘤作为一种较为常见的肝良性肿瘤。手术切除治疗肝血管瘤是目前认为最为确切的治疗手段，但应严格把握切除指征，对于无症状，但强烈要求手术治疗的病人不推荐手术。瘤体小于10cm一般不需要手术，定期门诊随访观察；大于10cm的肝血管瘤一般需手术切除。此外，伴发症状或者出现严重并发症的肝血管瘤可以手术，如腹痛、临近器官受压、血小板异常消耗或肝功能受其影响。肝血管瘤生长速度明显的血管瘤也推荐手术治疗。青年女性患有巨大肝血管瘤也可手术切除，这是因为肝血管瘤具有在妊娠期瘤体生长增大的特点和分娩时可能破裂大出血引发生命危险。对从事剧烈活动的职业或爱好者，如足球、篮球、拳击等，可能招致肝外伤的巨大肝血管瘤患者，也可以考虑手术切除。
肝血管瘤3厘米多，现在有时候感觉有点痛怎么治疗	肝血管瘤作为一种较为常见的肝良性肿瘤。手术切除治疗肝血管瘤是目前认为最为确切的治疗手段，但应严格把握切除指征，对于无症状，但强烈要求手术治疗的病人不推荐手术。瘤体小于10cm一般不需要手术，定期门诊随访观察；大于10cm的肝血管瘤一般需手术切除。此外，伴发症状或者出现严重并发症的肝血管瘤可以手术，如腹痛、临近器官受压、血小板异常消耗或肝功能受其影响。肝血管瘤生长速度明显的血管瘤也推荐手术治疗。青年女性患有巨大肝血管瘤也可手术切除，这是因为肝血管瘤具有在妊娠期瘤体生长增大的特点和分娩时可能破裂大出血引发生命危险。对从事剧烈活动的职业或爱好者，如足球、篮球、拳击等，可能招致肝外伤的巨大肝血管瘤患者，也可以考虑手术切除。
肝血管瘤可以怀孕吗，怎么治疗	肝血管瘤作为一种较为常见的肝良性肿瘤。手术切除治疗肝血管瘤是目前认为最为确切的治疗手段，但应严格把握切除指征，对于无症状，但强烈要求手术治疗的病人不推荐手术。瘤体小于10cm一般不需要手术，定期门诊随访观察；大于10cm的肝血管瘤一般需手术切除。此外，伴发症状或者出现严重并发症的肝血管瘤可以手术，如腹痛、临近器官受压、血小板异常消耗或肝功能受其影响。肝血管瘤生长速度明显的血管瘤也推荐手术治疗。青年女性患有巨大肝血管瘤也可手术切除，这是因为肝血管瘤具有在妊娠期瘤体生长增大的特点和分娩时可能破裂大出血引发生命危险。对从事剧烈活动的职业或爱好者，如足球、篮球、拳击等，可能招致肝外伤的巨大肝血管瘤患者，也可以考虑手术切除。
肝血管瘤右肝5*4*5cm用做手术吗？	肝血管瘤作为一种较为常见的肝良性肿瘤。手术切除治疗肝血管瘤是目前认为最为确切的治疗手段，但应严格把握切除指征，对于无症状，但强烈要求手术治疗的病人不推荐手术。瘤体小于10cm一般不需要手术，定期门诊随访观察；大于10cm的肝血管瘤一般需手术切除。此外，伴发症状或者出现严重并发症的肝血管瘤可以手术，如腹痛、临近器官受压、血小板异常消耗或肝功能受其影响。肝血管瘤生长速度明显的血管瘤也推荐手术治疗。青年女性患有巨大肝血管瘤也可手术切除，这是因为肝血管瘤具有在妊娠期瘤体生长增大的特点和分娩时可能破裂大出血引发生命危险。对从事剧烈活动的职业或爱好者，如足球、篮球、拳击等，可能招致肝外伤的巨大肝血管瘤患者，也可以考虑手术切除。
孕妇得了肝血管瘤怎么办？	肝血管瘤作为一种较为常见的肝良性肿瘤。手术切除治疗肝血管瘤是目前认为最为确切的治疗手段，但应严格把握切除指征，对于无症状，但强烈要求手术治疗的病人不推荐手术。瘤体小于10cm一般不需要手术，定期门诊随访观察；大于10cm的肝血管瘤一般需手术切除。此外，伴发症状或者出现严重并发症的肝血管瘤可以手术，如腹痛、临近器官受压、血小板异常消耗或肝功能受其影响。肝血管瘤生长速度明显的血管瘤也推荐手术治疗。青年女性患有巨大肝血管瘤也可手术切除，这是因为肝血管瘤具有在妊娠期瘤体生长增大的特点和分娩时可能破裂大出血引发生命危险。对从事剧烈活动的职业或爱好者，如足球、篮球、拳击等，可能招致肝外伤的巨大肝血管瘤患者，也可以考虑手术切除。
婆婆肝脏上的血管瘤需要手术吗	肝血管瘤作为一种较为常见的肝良性肿瘤。手术切除治疗肝血管瘤是目前认为最为确切的治疗手段，但应严格把握切除指征，对于无症状，但强烈要求手术治疗的病人不推荐手术。瘤体小于10cm一般不需要手术，定期门诊随访观察；大于10cm的肝血管瘤一般需手术切除。此外，伴发症状或者出现严重并发症的肝血管瘤可以手术，如腹痛、临近器官受压、血小板异常消耗或肝功能受其影响。肝血管瘤生长速度明显的血管瘤也推荐手术治疗。青年女性患有巨大肝血管瘤也可手术切除，这是因为肝血管瘤具有在妊娠期瘤体生长增大的特点和分娩时可能破裂大出血引发生命危险。对从事剧烈活动的职业或爱好者，如足球、篮球、拳击等，可能招致肝外伤的巨大肝血管瘤患者，也可以考虑手术切除。
肝上有血管瘤会癌变吗？	肝血管瘤作为一种良性肿瘤，大多无症状，且无恶变倾向，原则上以随访观察为主。这是目前国内外普遍接受的观念。肝血管瘤严重程度取决于肝血管瘤的生长速度和大小。当血管瘤较大且合并危险因素时，建议酌情治疗。肝血管瘤一点都不可怕，不会直接导致死亡，发现之后要保持平和心态。平时要避免过度劳累和剧烈运动，不要让肝区受到外力碰撞以免肝血管瘤破裂而出现严重的并发症。要定期去医院作复查。手术切除是最彻底的方法，此外还有局部消融术、肝动脉介入栓塞术等方法可以治疗肝血管瘤。口服药对较大的血管瘤效果不佳。这些治疗方法都有其相应的适应症与禁忌症，建议到正规医院就诊后评估病情，必要时多学科会诊联合评估，决定进一步治疗方案。
成人肝血管瘤怎么好啊？	肝血管瘤作为一种良性肿瘤，大多无症状，且无恶变倾向，原则上以随访观察为主。这是目前国内外普遍接受的观念。肝血管瘤严重程度取决于肝血管瘤的生长速度和大小。当血管瘤较大且合并危险因素时，建议酌情治疗。肝血管瘤一点都不可怕，不会直接导致死亡，发现之后要保持平和心态。平时要避免过度劳累和剧烈运动，不要让肝区受到外力碰撞以免肝血管瘤破裂而出现严重的并发症。要定期去医院作复查。手术切除是最彻底的方法，此外还有局部消融术、肝动脉介入栓塞术等方法可以治疗肝血管瘤。口服药对较大的血管瘤效果不佳。这些治疗方法都有其相应的适应症与禁忌症，建议到正规医院就诊后评估病情，必要时多学科会诊联合评估，决定进一步治疗方案。
肝血管瘤需要治疗吗	肝血管瘤作为一种良性肿瘤，大多无症状，且无恶变倾向，原则上以随访观察为主。这是目前国内外普遍接受的观念。肝血管瘤严重程度取决于肝血管瘤的生长速度和大小。当血管瘤较大且合并危险因素时，建议酌情治疗。肝血管瘤一点都不可怕，不会直接导致死亡，发现之后要保持平和心态。平时要避免过度劳累和剧烈运动，不要让肝区受到外力碰撞以免肝血管瘤破裂而出现严重的并发症。要定期去医院作复查。手术切除是最彻底的方法，此外还有局部消融术、肝动脉介入栓塞术等方法可以治疗肝血管瘤。口服药对较大的血管瘤效果不佳。这些治疗方法都有其相应的适应症与禁忌症，建议到正规医院就诊后评估病情，必要时多学科会诊联合评估，决定进一步治疗方案。
肝血管瘤良性不需要治疗了吗？	肝血管瘤作为一种良性肿瘤，大多无症状，且无恶变倾向，原则上以随访观察为主。这是目前国内外普遍接受的观念。肝血管瘤严重程度取决于肝血管瘤的生长速度和大小。当血管瘤较大且合并危险因素时，建议酌情治疗。肝血管瘤一点都不可怕，不会直接导致死亡，发现之后要保持平和心态。平时要避免过度劳累和剧烈运动，不要让肝区受到外力碰撞以免肝血管瘤破裂而出现严重的并发症。要定期去医院作复查。手术切除是最彻底的方法，此外还有局部消融术、肝动脉介入栓塞术等方法可以治疗肝血管瘤。口服药对较大的血管瘤效果不佳。这些治疗方法都有其相应的适应症与禁忌症，建议到正规医院就诊后评估病情，必要时多学科会诊联合评估，决定进一步治疗方案。
肝血管瘤良性怎么治疗？	肝血管瘤作为一种良性肿瘤，大多无症状，且无恶变倾向，原则上以随访观察为主。这是目前国内外普遍接受的观念。肝血管瘤严重程度取决于肝血管瘤的生长速度和大小。当血管瘤较大且合并危险因素时，建议酌情治疗。肝血管瘤一点都不可怕，不会直接导致死亡，发现之后要保持平和心态。平时要避免过度劳累和剧烈运动，不要让肝区受到外力碰撞以免肝血管瘤破裂而出现严重的并发症。要定期去医院作复查。手术切除是最彻底的方法，此外还有局部消融术、肝动脉介入栓塞术等方法可以治疗肝血管瘤。口服药对较大的血管瘤效果不佳。这些治疗方法都有其相应的适应症与禁忌症，建议到正规医院就诊后评估病情，必要时多学科会诊联合评估，决定进一步治疗方案。
老人肝血管瘤好治吗？	肝血管瘤作为一种良性肿瘤，大多无症状，且无恶变倾向，原则上以随访观察为主。这是目前国内外普遍接受的观念。肝血管瘤严重程度取决于肝血管瘤的生长速度和大小。当血管瘤较大且合并危险因素时，建议酌情治疗。肝血管瘤一点都不可怕，不会直接导致死亡，发现之后要保持平和心态。平时要避免过度劳累和剧烈运动，不要让肝区受到外力碰撞以免肝血管瘤破裂而出现严重的并发症。要定期去医院作复查。手术切除是最彻底的方法，此外还有局部消融术、肝动脉介入栓塞术等方法可以治疗肝血管瘤。口服药对较大的血管瘤效果不佳。这些治疗方法都有其相应的适应症与禁忌症，建议到正规医院就诊后评估病情，必要时多学科会诊联合评估，决定进一步治疗方案。
肝血管瘤什么手术最好？	肝血管瘤作为一种良性肿瘤，大多无症状，且无恶变倾向，原则上以随访观察为主。这是目前国内外普遍接受的观念。肝血管瘤严重程度取决于肝血管瘤的生长速度和大小。当血管瘤较大且合并危险因素时，建议酌情治疗。肝血管瘤一点都不可怕，不会直接导致死亡，发现之后要保持平和心态。平时要避免过度劳累和剧烈运动，不要让肝区受到外力碰撞以免肝血管瘤破裂而出现严重的并发症。要定期去医院作复查。手术切除是最彻底的方法，此外还有局部消融术、肝动脉介入栓塞术等方法可以治疗肝血管瘤。口服药对较大的血管瘤效果不佳。这些治疗方法都有其相应的适应症与禁忌症，建议到正规医院就诊后评估病情，必要时多学科会诊联合评估，决定进一步治疗方案。
左肝血管瘤好治吗？	肝血管瘤作为一种良性肿瘤，大多无症状，且无恶变倾向，原则上以随访观察为主。这是目前国内外普遍接受的观念。肝血管瘤严重程度取决于肝血管瘤的生长速度和大小。当血管瘤较大且合并危险因素时，建议酌情治疗。肝血管瘤一点都不可怕，不会直接导致死亡，发现之后要保持平和心态。平时要避免过度劳累和剧烈运动，不要让肝区受到外力碰撞以免肝血管瘤破裂而出现严重的并发症。要定期去医院作复查。手术切除是最彻底的方法，此外还有局部消融术、肝动脉介入栓塞术等方法可以治疗肝血管瘤。口服药对较大的血管瘤效果不佳。这些治疗方法都有其相应的适应症与禁忌症，建议到正规医院就诊后评估病情，必要时多学科会诊联合评估，决定进一步治疗方案。
右后叶肝血管瘤的简介和治疗	肝血管瘤作为一种良性肿瘤，大多无症状，且无恶变倾向，原则上以随访观察为主。这是目前国内外普遍接受的观念。肝血管瘤严重程度取决于肝血管瘤的生长速度和大小。当血管瘤较大且合并危险因素时，建议酌情治疗。肝血管瘤一点都不可怕，不会直接导致死亡，发现之后要保持平和心态。平时要避免过度劳累和剧烈运动，不要让肝区受到外力碰撞以免肝血管瘤破裂而出现严重的并发症。要定期去医院作复查。手术切除是最彻底的方法，此外还有局部消融术、肝动脉介入栓塞术等方法可以治疗肝血管瘤。口服药对较大的血管瘤效果不佳。这些治疗方法都有其相应的适应症与禁忌症，建议到正规医院就诊后评估病情，必要时多学科会诊联合评估，决定进一步治疗方案。
肝血管瘤要怎么治疗最好	肝血管瘤作为一种良性肿瘤，大多无症状，且无恶变倾向，原则上以随访观察为主。这是目前国内外普遍接受的观念。肝血管瘤严重程度取决于肝血管瘤的生长速度和大小。当血管瘤较大且合并危险因素时，建议酌情治疗。肝血管瘤一点都不可怕，不会直接导致死亡，发现之后要保持平和心态。平时要避免过度劳累和剧烈运动，不要让肝区受到外力碰撞以免肝血管瘤破裂而出现严重的并发症。要定期去医院作复查。手术切除是最彻底的方法，此外还有局部消融术、肝动脉介入栓塞术等方法可以治疗肝血管瘤。口服药对较大的血管瘤效果不佳。这些治疗方法都有其相应的适应症与禁忌症，建议到正规医院就诊后评估病情，必要时多学科会诊联合评估，决定进一步治疗方案。
肝血管瘤冶疗有哪些	肝血管瘤作为一种良性肿瘤，大多无症状，且无恶变倾向，原则上以随访观察为主。这是目前国内外普遍接受的观念。肝血管瘤严重程度取决于肝血管瘤的生长速度和大小。当血管瘤较大且合并危险因素时，建议酌情治疗。肝血管瘤一点都不可怕，不会直接导致死亡，发现之后要保持平和心态。平时要避免过度劳累和剧烈运动，不要让肝区受到外力碰撞以免肝血管瘤破裂而出现严重的并发症。要定期去医院作复查。手术切除是最彻底的方法，此外还有局部消融术、肝动脉介入栓塞术等方法可以治疗肝血管瘤。口服药对较大的血管瘤效果不佳。这些治疗方法都有其相应的适应症与禁忌症，建议到正规医院就诊后评估病情，必要时多学科会诊联合评估，决定进一步治疗方案。
肝血管瘤一定需要治疗吗？	肝血管瘤作为一种良性肿瘤，大多无症状，且无恶变倾向，原则上以随访观察为主。这是目前国内外普遍接受的观念。肝血管瘤严重程度取决于肝血管瘤的生长速度和大小。当血管瘤较大且合并危险因素时，建议酌情治疗。肝血管瘤一点都不可怕，不会直接导致死亡，发现之后要保持平和心态。平时要避免过度劳累和剧烈运动，不要让肝区受到外力碰撞以免肝血管瘤破裂而出现严重的并发症。要定期去医院作复查。手术切除是最彻底的方法，此外还有局部消融术、肝动脉介入栓塞术等方法可以治疗肝血管瘤。口服药对较大的血管瘤效果不佳。这些治疗方法都有其相应的适应症与禁忌症，建议到正规医院就诊后评估病情，必要时多学科会诊联合评估，决定进一步治疗方案。
肝血管瘤怎么变小？	肝血管瘤作为一种良性肿瘤，大多无症状，且无恶变倾向，原则上以随访观察为主。这是目前国内外普遍接受的观念。肝血管瘤严重程度取决于肝血管瘤的生长速度和大小。当血管瘤较大且合并危险因素时，建议酌情治疗。肝血管瘤一点都不可怕，不会直接导致死亡，发现之后要保持平和心态。平时要避免过度劳累和剧烈运动，不要让肝区受到外力碰撞以免肝血管瘤破裂而出现严重的并发症。要定期去医院作复查。手术切除是最彻底的方法，此外还有局部消融术、肝动脉介入栓塞术等方法可以治疗肝血管瘤。口服药对较大的血管瘤效果不佳。这些治疗方法都有其相应的适应症与禁忌症，建议到正规医院就诊后评估病情，必要时多学科会诊联合评估，决定进一步治疗方案。
肝血管瘤怎么治疗	肝血管瘤作为一种良性肿瘤，大多无症状，且无恶变倾向，原则上以随访观察为主。这是目前国内外普遍接受的观念。肝血管瘤严重程度取决于肝血管瘤的生长速度和大小。当血管瘤较大且合并危险因素时，建议酌情治疗。肝血管瘤一点都不可怕，不会直接导致死亡，发现之后要保持平和心态。平时要避免过度劳累和剧烈运动，不要让肝区受到外力碰撞以免肝血管瘤破裂而出现严重的并发症。要定期去医院作复查。手术切除是最彻底的方法，此外还有局部消融术、肝动脉介入栓塞术等方法可以治疗肝血管瘤。口服药对较大的血管瘤效果不佳。这些治疗方法都有其相应的适应症与禁忌症，建议到正规医院就诊后评估病情，必要时多学科会诊联合评估，决定进一步治疗方案。
肝血管瘤怎么治疗？一年增长一倍多	肝血管瘤作为一种良性肿瘤，大多无症状，且无恶变倾向，原则上以随访观察为主。这是目前国内外普遍接受的观念。肝血管瘤严重程度取决于肝血管瘤的生长速度和大小。当血管瘤较大且合并危险因素时，建议酌情治疗。肝血管瘤一点都不可怕，不会直接导致死亡，发现之后要保持平和心态。平时要避免过度劳累和剧烈运动，不要让肝区受到外力碰撞以免肝血管瘤破裂而出现严重的并发症。要定期去医院作复查。手术切除是最彻底的方法，此外还有局部消融术、肝动脉介入栓塞术等方法可以治疗肝血管瘤。口服药对较大的血管瘤效果不佳。这些治疗方法都有其相应的适应症与禁忌症，建议到正规医院就诊后评估病情，必要时多学科会诊联合评估，决定进一步治疗方案。
肝血管瘤怎么治疗最好	肝血管瘤作为一种良性肿瘤，大多无症状，且无恶变倾向，原则上以随访观察为主。这是目前国内外普遍接受的观念。肝血管瘤严重程度取决于肝血管瘤的生长速度和大小。当血管瘤较大且合并危险因素时，建议酌情治疗。肝血管瘤一点都不可怕，不会直接导致死亡，发现之后要保持平和心态。平时要避免过度劳累和剧烈运动，不要让肝区受到外力碰撞以免肝血管瘤破裂而出现严重的并发症。要定期去医院作复查。手术切除是最彻底的方法，此外还有局部消融术、肝动脉介入栓塞术等方法可以治疗肝血管瘤。口服药对较大的血管瘤效果不佳。这些治疗方法都有其相应的适应症与禁忌症，建议到正规医院就诊后评估病情，必要时多学科会诊联合评估，决定进一步治疗方案。
肝血管瘤怎样才能尽快消除	肝血管瘤作为一种良性肿瘤，大多无症状，且无恶变倾向，原则上以随访观察为主。这是目前国内外普遍接受的观念。肝血管瘤严重程度取决于肝血管瘤的生长速度和大小。当血管瘤较大且合并危险因素时，建议酌情治疗。肝血管瘤一点都不可怕，不会直接导致死亡，发现之后要保持平和心态。平时要避免过度劳累和剧烈运动，不要让肝区受到外力碰撞以免肝血管瘤破裂而出现严重的并发症。要定期去医院作复查。手术切除是最彻底的方法，此外还有局部消融术、肝动脉介入栓塞术等方法可以治疗肝血管瘤。口服药对较大的血管瘤效果不佳。这些治疗方法都有其相应的适应症与禁忌症，建议到正规医院就诊后评估病情，必要时多学科会诊联合评估，决定进一步治疗方案。
肝血管瘤怎样才能慢慢消除	肝血管瘤作为一种良性肿瘤，大多无症状，且无恶变倾向，原则上以随访观察为主。这是目前国内外普遍接受的观念。肝血管瘤严重程度取决于肝血管瘤的生长速度和大小。当血管瘤较大且合并危险因素时，建议酌情治疗。肝血管瘤一点都不可怕，不会直接导致死亡，发现之后要保持平和心态。平时要避免过度劳累和剧烈运动，不要让肝区受到外力碰撞以免肝血管瘤破裂而出现严重的并发症。要定期去医院作复查。手术切除是最彻底的方法，此外还有局部消融术、肝动脉介入栓塞术等方法可以治疗肝血管瘤。口服药对较大的血管瘤效果不佳。这些治疗方法都有其相应的适应症与禁忌症，建议到正规医院就诊后评估病情，必要时多学科会诊联合评估，决定进一步治疗方案。
肝血管瘤怎样治疗最好？	肝血管瘤作为一种良性肿瘤，大多无症状，且无恶变倾向，原则上以随访观察为主。这是目前国内外普遍接受的观念。肝血管瘤严重程度取决于肝血管瘤的生长速度和大小。当血管瘤较大且合并危险因素时，建议酌情治疗。肝血管瘤一点都不可怕，不会直接导致死亡，发现之后要保持平和心态。平时要避免过度劳累和剧烈运动，不要让肝区受到外力碰撞以免肝血管瘤破裂而出现严重的并发症。要定期去医院作复查。手术切除是最彻底的方法，此外还有局部消融术、肝动脉介入栓塞术等方法可以治疗肝血管瘤。口服药对较大的血管瘤效果不佳。这些治疗方法都有其相应的适应症与禁忌症，建议到正规医院就诊后评估病情，必要时多学科会诊联合评估，决定进一步治疗方案。
血管瘤在肝脏上，尺寸是2CM*3CM，得怎么治？	肝血管瘤作为一种良性肿瘤，大多无症状，且无恶变倾向，原则上以随访观察为主。这是目前国内外普遍接受的观念。肝血管瘤严重程度取决于肝血管瘤的生长速度和大小。当血管瘤较大且合并危险因素时，建议酌情治疗。肝血管瘤一点都不可怕，不会直接导致死亡，发现之后要保持平和心态。平时要避免过度劳累和剧烈运动，不要让肝区受到外力碰撞以免肝血管瘤破裂而出现严重的并发症。要定期去医院作复查。手术切除是最彻底的方法，此外还有局部消融术、肝动脉介入栓塞术等方法可以治疗肝血管瘤。口服药对较大的血管瘤效果不佳。这些治疗方法都有其相应的适应症与禁忌症，建议到正规医院就诊后评估病情，必要时多学科会诊联合评估，决定进一步治疗方案。
肝脏长了血管瘤怎么办	肝血管瘤作为一种良性肿瘤，大多无症状，且无恶变倾向，原则上以随访观察为主。这是目前国内外普遍接受的观念。肝血管瘤严重程度取决于肝血管瘤的生长速度和大小。当血管瘤较大且合并危险因素时，建议酌情治疗。肝血管瘤一点都不可怕，不会直接导致死亡，发现之后要保持平和心态。平时要避免过度劳累和剧烈运动，不要让肝区受到外力碰撞以免肝血管瘤破裂而出现严重的并发症。要定期去医院作复查。手术切除是最彻底的方法，此外还有局部消融术、肝动脉介入栓塞术等方法可以治疗肝血管瘤。口服药对较大的血管瘤效果不佳。这些治疗方法都有其相应的适应症与禁忌症，建议到正规医院就诊后评估病情，必要时多学科会诊联合评估，决定进一步治疗方案。
肝血管瘤怎么办	肝血管瘤作为一种良性肿瘤，大多无症状，且无恶变倾向，原则上以随访观察为主。这是目前国内外普遍接受的观念。肝血管瘤严重程度取决于肝血管瘤的生长速度和大小。当血管瘤较大且合并危险因素时，建议酌情治疗。肝血管瘤一点都不可怕，不会直接导致死亡，发现之后要保持平和心态。平时要避免过度劳累和剧烈运动，不要让肝区受到外力碰撞以免肝血管瘤破裂而出现严重的并发症。要定期去医院作复查。手术切除是最彻底的方法，此外还有局部消融术、肝动脉介入栓塞术等方法可以治疗肝血管瘤。口服药对较大的血管瘤效果不佳。这些治疗方法都有其相应的适应症与禁忌症，建议到正规医院就诊后评估病情，必要时多学科会诊联合评估，决定进一步治疗方案。
医生您好今天我查体时查出肝血管瘤直径4厘米，该怎么办	肝血管瘤作为一种良性肿瘤，大多无症状，且无恶变倾向，原则上以随访观察为主。这是目前国内外普遍接受的观念。肝血管瘤严重程度取决于肝血管瘤的生长速度和大小。当血管瘤较大且合并危险因素时，建议酌情治疗。肝血管瘤一点都不可怕，不会直接导致死亡，发现之后要保持平和心态。平时要避免过度劳累和剧烈运动，不要让肝区受到外力碰撞以免肝血管瘤破裂而出现严重的并发症。要定期去医院作复查。手术切除是最彻底的方法，此外还有局部消融术、肝动脉介入栓塞术等方法可以治疗肝血管瘤。口服药对较大的血管瘤效果不佳。这些治疗方法都有其相应的适应症与禁忌症，建议到正规医院就诊后评估病情，必要时多学科会诊联合评估，决定进一步治疗方案。
肝脏的血管瘤怎么治疗	肝血管瘤作为一种良性肿瘤，大多无症状，且无恶变倾向，原则上以随访观察为主。这是目前国内外普遍接受的观念。肝血管瘤严重程度取决于肝血管瘤的生长速度和大小。当血管瘤较大且合并危险因素时，建议酌情治疗。肝血管瘤一点都不可怕，不会直接导致死亡，发现之后要保持平和心态。平时要避免过度劳累和剧烈运动，不要让肝区受到外力碰撞以免肝血管瘤破裂而出现严重的并发症。要定期去医院作复查。手术切除是最彻底的方法，此外还有局部消融术、肝动脉介入栓塞术等方法可以治疗肝血管瘤。口服药对较大的血管瘤效果不佳。这些治疗方法都有其相应的适应症与禁忌症，建议到正规医院就诊后评估病情，必要时多学科会诊联合评估，决定进一步治疗方案。
肝脏多发血管瘤怎么办	肝血管瘤作为一种良性肿瘤，大多无症状，且无恶变倾向，原则上以随访观察为主。这是目前国内外普遍接受的观念。肝血管瘤严重程度取决于肝血管瘤的生长速度和大小。当血管瘤较大且合并危险因素时，建议酌情治疗。肝血管瘤一点都不可怕，不会直接导致死亡，发现之后要保持平和心态。平时要避免过度劳累和剧烈运动，不要让肝区受到外力碰撞以免肝血管瘤破裂而出现严重的并发症。要定期去医院作复查。手术切除是最彻底的方法，此外还有局部消融术、肝动脉介入栓塞术等方法可以治疗肝血管瘤。口服药对较大的血管瘤效果不佳。这些治疗方法都有其相应的适应症与禁忌症，建议到正规医院就诊后评估病情，必要时多学科会诊联合评估，决定进一步治疗方案。
多发肝血管瘤需要治疗吗？	肝血管瘤作为一种良性肿瘤，大多无症状，且无恶变倾向，原则上以随访观察为主。这是目前国内外普遍接受的观念。肝血管瘤严重程度取决于肝血管瘤的生长速度和大小。当血管瘤较大且合并危险因素时，建议酌情治疗。肝血管瘤一点都不可怕，不会直接导致死亡，发现之后要保持平和心态。平时要避免过度劳累和剧烈运动，不要让肝区受到外力碰撞以免肝血管瘤破裂而出现严重的并发症。要定期去医院作复查。手术切除是最彻底的方法，此外还有局部消融术、肝动脉介入栓塞术等方法可以治疗肝血管瘤。口服药对较大的血管瘤效果不佳。这些治疗方法都有其相应的适应症与禁忌症，建议到正规医院就诊后评估病情，必要时多学科会诊联合评估，决定进一步治疗方案。
多发性肝血管瘤能治吗？	肝血管瘤作为一种良性肿瘤，大多无症状，且无恶变倾向，原则上以随访观察为主。这是目前国内外普遍接受的观念。肝血管瘤严重程度取决于肝血管瘤的生长速度和大小。当血管瘤较大且合并危险因素时，建议酌情治疗。肝血管瘤一点都不可怕，不会直接导致死亡，发现之后要保持平和心态。平时要避免过度劳累和剧烈运动，不要让肝区受到外力碰撞以免肝血管瘤破裂而出现严重的并发症。要定期去医院作复查。手术切除是最彻底的方法，此外还有局部消融术、肝动脉介入栓塞术等方法可以治疗肝血管瘤。口服药对较大的血管瘤效果不佳。这些治疗方法都有其相应的适应症与禁忌症，建议到正规医院就诊后评估病情，必要时多学科会诊联合评估，决定进一步治疗方案。
肝脏血管瘤如何治疗	肝血管瘤作为一种良性肿瘤，大多无症状，且无恶变倾向，原则上以随访观察为主。这是目前国内外普遍接受的观念。肝血管瘤严重程度取决于肝血管瘤的生长速度和大小。当血管瘤较大且合并危险因素时，建议酌情治疗。肝血管瘤一点都不可怕，不会直接导致死亡，发现之后要保持平和心态。平时要避免过度劳累和剧烈运动，不要让肝区受到外力碰撞以免肝血管瘤破裂而出现严重的并发症。要定期去医院作复查。手术切除是最彻底的方法，此外还有局部消融术、肝动脉介入栓塞术等方法可以治疗肝血管瘤。口服药对较大的血管瘤效果不佳。这些治疗方法都有其相应的适应症与禁忌症，建议到正规医院就诊后评估病情，必要时多学科会诊联合评估，决定进一步治疗方案。
我做了彩超，发现肝脏上有个1公分大的血管瘤.我该咋办？	肝血管瘤作为一种良性肿瘤，大多无症状，且无恶变倾向，原则上以随访观察为主。这是目前国内外普遍接受的观念。肝血管瘤严重程度取决于肝血管瘤的生长速度和大小。当血管瘤较大且合并危险因素时，建议酌情治疗。肝血管瘤一点都不可怕，不会直接导致死亡，发现之后要保持平和心态。平时要避免过度劳累和剧烈运动，不要让肝区受到外力碰撞以免肝血管瘤破裂而出现严重的并发症。要定期去医院作复查。手术切除是最彻底的方法，此外还有局部消融术、肝动脉介入栓塞术等方法可以治疗肝血管瘤。口服药对较大的血管瘤效果不佳。这些治疗方法都有其相应的适应症与禁忌症，建议到正规医院就诊后评估病情，必要时多学科会诊联合评估，决定进一步治疗方案。
肝上长血管瘤怎么治？	肝血管瘤作为一种良性肿瘤，大多无症状，且无恶变倾向，原则上以随访观察为主。这是目前国内外普遍接受的观念。肝血管瘤严重程度取决于肝血管瘤的生长速度和大小。当血管瘤较大且合并危险因素时，建议酌情治疗。肝血管瘤一点都不可怕，不会直接导致死亡，发现之后要保持平和心态。平时要避免过度劳累和剧烈运动，不要让肝区受到外力碰撞以免肝血管瘤破裂而出现严重的并发症。要定期去医院作复查。手术切除是最彻底的方法，此外还有局部消融术、肝动脉介入栓塞术等方法可以治疗肝血管瘤。口服药对较大的血管瘤效果不佳。这些治疗方法都有其相应的适应症与禁忌症，建议到正规医院就诊后评估病情，必要时多学科会诊联合评估，决定进一步治疗方案。
肝血管瘤7.7cm4.7cm需要治疗吗？如何治？	肝血管瘤作为一种良性肿瘤，大多无症状，且无恶变倾向，原则上以随访观察为主。这是目前国内外普遍接受的观念。肝血管瘤严重程度取决于肝血管瘤的生长速度和大小。当血管瘤较大且合并危险因素时，建议酌情治疗。肝血管瘤一点都不可怕，不会直接导致死亡，发现之后要保持平和心态。平时要避免过度劳累和剧烈运动，不要让肝区受到外力碰撞以免肝血管瘤破裂而出现严重的并发症。要定期去医院作复查。手术切除是最彻底的方法，此外还有局部消融术、肝动脉介入栓塞术等方法可以治疗肝血管瘤。口服药对较大的血管瘤效果不佳。这些治疗方法都有其相应的适应症与禁忌症，建议到正规医院就诊后评估病情，必要时多学科会诊联合评估，决定进一步治疗方案。
肝脏血管瘤怎么治疗？	肝血管瘤作为一种良性肿瘤，大多无症状，且无恶变倾向，原则上以随访观察为主。这是目前国内外普遍接受的观念。肝血管瘤严重程度取决于肝血管瘤的生长速度和大小。当血管瘤较大且合并危险因素时，建议酌情治疗。肝血管瘤一点都不可怕，不会直接导致死亡，发现之后要保持平和心态。平时要避免过度劳累和剧烈运动，不要让肝区受到外力碰撞以免肝血管瘤破裂而出现严重的并发症。要定期去医院作复查。手术切除是最彻底的方法，此外还有局部消融术、肝动脉介入栓塞术等方法可以治疗肝血管瘤。口服药对较大的血管瘤效果不佳。这些治疗方法都有其相应的适应症与禁忌症，建议到正规医院就诊后评估病情，必要时多学科会诊联合评估，决定进一步治疗方案。
肝脏上长了一个血管瘤，该怎么办	肝血管瘤作为一种良性肿瘤，大多无症状，且无恶变倾向，原则上以随访观察为主。这是目前国内外普遍接受的观念。肝血管瘤严重程度取决于肝血管瘤的生长速度和大小。当血管瘤较大且合并危险因素时，建议酌情治疗。肝血管瘤一点都不可怕，不会直接导致死亡，发现之后要保持平和心态。平时要避免过度劳累和剧烈运动，不要让肝区受到外力碰撞以免肝血管瘤破裂而出现严重的并发症。要定期去医院作复查。手术切除是最彻底的方法，此外还有局部消融术、肝动脉介入栓塞术等方法可以治疗肝血管瘤。口服药对较大的血管瘤效果不佳。这些治疗方法都有其相应的适应症与禁忌症，建议到正规医院就诊后评估病情，必要时多学科会诊联合评估，决定进一步治疗方案。
肝血管瘤的有效治疗方法有哪些？	肝血管瘤作为一种良性肿瘤，大多无症状，且无恶变倾向，原则上以随访观察为主。这是目前国内外普遍接受的观念。肝血管瘤严重程度取决于肝血管瘤的生长速度和大小。当血管瘤较大且合并危险因素时，建议酌情治疗。肝血管瘤一点都不可怕，不会直接导致死亡，发现之后要保持平和心态。平时要避免过度劳累和剧烈运动，不要让肝区受到外力碰撞以免肝血管瘤破裂而出现严重的并发症。要定期去医院作复查。手术切除是最彻底的方法，此外还有局部消融术、肝动脉介入栓塞术等方法可以治疗肝血管瘤。口服药对较大的血管瘤效果不佳。这些治疗方法都有其相应的适应症与禁忌症，建议到正规医院就诊后评估病情，必要时多学科会诊联合评估，决定进一步治疗方案。
肝血管瘤的治疗方法	肝血管瘤作为一种良性肿瘤，大多无症状，且无恶变倾向，原则上以随访观察为主。这是目前国内外普遍接受的观念。肝血管瘤严重程度取决于肝血管瘤的生长速度和大小。当血管瘤较大且合并危险因素时，建议酌情治疗。肝血管瘤一点都不可怕，不会直接导致死亡，发现之后要保持平和心态。平时要避免过度劳累和剧烈运动，不要让肝区受到外力碰撞以免肝血管瘤破裂而出现严重的并发症。要定期去医院作复查。手术切除是最彻底的方法，此外还有局部消融术、肝动脉介入栓塞术等方法可以治疗肝血管瘤。口服药对较大的血管瘤效果不佳。这些治疗方法都有其相应的适应症与禁忌症，建议到正规医院就诊后评估病情，必要时多学科会诊联合评估，决定进一步治疗方案。
肝血管瘤的最佳治疗的方法是哪种？	肝血管瘤作为一种良性肿瘤，大多无症状，且无恶变倾向，原则上以随访观察为主。这是目前国内外普遍接受的观念。肝血管瘤严重程度取决于肝血管瘤的生长速度和大小。当血管瘤较大且合并危险因素时，建议酌情治疗。肝血管瘤一点都不可怕，不会直接导致死亡，发现之后要保持平和心态。平时要避免过度劳累和剧烈运动，不要让肝区受到外力碰撞以免肝血管瘤破裂而出现严重的并发症。要定期去医院作复查。手术切除是最彻底的方法，此外还有局部消融术、肝动脉介入栓塞术等方法可以治疗肝血管瘤。口服药对较大的血管瘤效果不佳。这些治疗方法都有其相应的适应症与禁忌症，建议到正规医院就诊后评估病情，必要时多学科会诊联合评估，决定进一步治疗方案。
肝部长了血管瘤怎么办	肝血管瘤作为一种良性肿瘤，大多无症状，且无恶变倾向，原则上以随访观察为主。这是目前国内外普遍接受的观念。肝血管瘤严重程度取决于肝血管瘤的生长速度和大小。当血管瘤较大且合并危险因素时，建议酌情治疗。肝血管瘤一点都不可怕，不会直接导致死亡，发现之后要保持平和心态。平时要避免过度劳累和剧烈运动，不要让肝区受到外力碰撞以免肝血管瘤破裂而出现严重的并发症。要定期去医院作复查。手术切除是最彻底的方法，此外还有局部消融术、肝动脉介入栓塞术等方法可以治疗肝血管瘤。口服药对较大的血管瘤效果不佳。这些治疗方法都有其相应的适应症与禁忌症，建议到正规医院就诊后评估病情，必要时多学科会诊联合评估，决定进一步治疗方案。
肝多发囊肿和血管瘤怎么办？	肝血管瘤作为一种良性肿瘤，大多无症状，且无恶变倾向，原则上以随访观察为主。这是目前国内外普遍接受的观念。肝血管瘤严重程度取决于肝血管瘤的生长速度和大小。当血管瘤较大且合并危险因素时，建议酌情治疗。肝血管瘤一点都不可怕，不会直接导致死亡，发现之后要保持平和心态。平时要避免过度劳累和剧烈运动，不要让肝区受到外力碰撞以免肝血管瘤破裂而出现严重的并发症。要定期去医院作复查。手术切除是最彻底的方法，此外还有局部消融术、肝动脉介入栓塞术等方法可以治疗肝血管瘤。口服药对较大的血管瘤效果不佳。这些治疗方法都有其相应的适应症与禁忌症，建议到正规医院就诊后评估病情，必要时多学科会诊联合评估，决定进一步治疗方案。
肝海绵状血管瘤还能治吗	肝血管瘤作为一种良性肿瘤，大多无症状，且无恶变倾向，原则上以随访观察为主。这是目前国内外普遍接受的观念。肝血管瘤严重程度取决于肝血管瘤的生长速度和大小。当血管瘤较大且合并危险因素时，建议酌情治疗。肝血管瘤一点都不可怕，不会直接导致死亡，发现之后要保持平和心态。平时要避免过度劳累和剧烈运动，不要让肝区受到外力碰撞以免肝血管瘤破裂而出现严重的并发症。要定期去医院作复查。手术切除是最彻底的方法，此外还有局部消融术、肝动脉介入栓塞术等方法可以治疗肝血管瘤。口服药对较大的血管瘤效果不佳。这些治疗方法都有其相应的适应症与禁忌症，建议到正规医院就诊后评估病情，必要时多学科会诊联合评估，决定进一步治疗方案。
肝血管瘤有什么危害？一定要治疗吗？	肝血管瘤作为一种良性肿瘤，大多无症状，且无恶变倾向，原则上以随访观察为主。这是目前国内外普遍接受的观念。肝血管瘤严重程度取决于肝血管瘤的生长速度和大小。当血管瘤较大且合并危险因素时，建议酌情治疗。肝血管瘤一点都不可怕，不会直接导致死亡，发现之后要保持平和心态。平时要避免过度劳累和剧烈运动，不要让肝区受到外力碰撞以免肝血管瘤破裂而出现严重的并发症。要定期去医院作复查。手术切除是最彻底的方法，此外还有局部消融术、肝动脉介入栓塞术等方法可以治疗肝血管瘤。口服药对较大的血管瘤效果不佳。这些治疗方法都有其相应的适应症与禁忌症，建议到正规医院就诊后评估病情，必要时多学科会诊联合评估，决定进一步治疗方案。
多发性肝血管瘤危险吗？	肝血管瘤作为一种良性肿瘤，大多无症状，且无恶变倾向，原则上以随访观察为主。这是目前国内外普遍接受的观念。肝血管瘤严重程度取决于肝血管瘤的生长速度和大小。当血管瘤较大且合并危险因素时，建议酌情治疗。肝血管瘤一点都不可怕，不会直接导致死亡，发现之后要保持平和心态。平时要避免过度劳累和剧烈运动，不要让肝区受到外力碰撞以免肝血管瘤破裂而出现严重的并发症。要定期去医院作复查。手术切除是最彻底的方法，此外还有局部消融术、肝动脉介入栓塞术等方法可以治疗肝血管瘤。口服药对较大的血管瘤效果不佳。这些治疗方法都有其相应的适应症与禁忌症，建议到正规医院就诊后评估病情，必要时多学科会诊联合评估，决定进一步治疗方案。
多发性肝血管瘤严重吗？	肝血管瘤作为一种良性肿瘤，大多无症状，且无恶变倾向，原则上以随访观察为主。这是目前国内外普遍接受的观念。肝血管瘤严重程度取决于肝血管瘤的生长速度和大小。当血管瘤较大且合并危险因素时，建议酌情治疗。肝血管瘤一点都不可怕，不会直接导致死亡，发现之后要保持平和心态。平时要避免过度劳累和剧烈运动，不要让肝区受到外力碰撞以免肝血管瘤破裂而出现严重的并发症。要定期去医院作复查。手术切除是最彻底的方法，此外还有局部消融术、肝动脉介入栓塞术等方法可以治疗肝血管瘤。口服药对较大的血管瘤效果不佳。这些治疗方法都有其相应的适应症与禁忌症，建议到正规医院就诊后评估病情，必要时多学科会诊联合评估，决定进一步治疗方案。
1cm肝血管瘤严重吗？	肝血管瘤作为一种良性肿瘤，大多无症状，且无恶变倾向，原则上以随访观察为主。这是目前国内外普遍接受的观念。肝血管瘤严重程度取决于肝血管瘤的生长速度和大小。当血管瘤较大且合并危险因素时，建议酌情治疗。肝血管瘤一点都不可怕，不会直接导致死亡，发现之后要保持平和心态。平时要避免过度劳累和剧烈运动，不要让肝区受到外力碰撞以免肝血管瘤破裂而出现严重的并发症。要定期去医院作复查。手术切除是最彻底的方法，此外还有局部消融术、肝动脉介入栓塞术等方法可以治疗肝血管瘤。口服药对较大的血管瘤效果不佳。这些治疗方法都有其相应的适应症与禁忌症，建议到正规医院就诊后评估病情，必要时多学科会诊联合评估，决定进一步治疗方案。
肝血管瘤10×9mm严重吗，需要怎么治疗...	肝血管瘤作为一种良性肿瘤，大多无症状，且无恶变倾向，原则上以随访观察为主。这是目前国内外普遍接受的观念。肝血管瘤严重程度取决于肝血管瘤的生长速度和大小。当血管瘤较大且合并危险因素时，建议酌情治疗。肝血管瘤一点都不可怕，不会直接导致死亡，发现之后要保持平和心态。平时要避免过度劳累和剧烈运动，不要让肝区受到外力碰撞以免肝血管瘤破裂而出现严重的并发症。要定期去医院作复查。手术切除是最彻底的方法，此外还有局部消融术、肝动脉介入栓塞术等方法可以治疗肝血管瘤。口服药对较大的血管瘤效果不佳。这些治疗方法都有其相应的适应症与禁忌症，建议到正规医院就诊后评估病情，必要时多学科会诊联合评估，决定进一步治疗方案。
肝脏小血管瘤严重吗？	肝血管瘤作为一种良性肿瘤，大多无症状，且无恶变倾向，原则上以随访观察为主。这是目前国内外普遍接受的观念。肝血管瘤严重程度取决于肝血管瘤的生长速度和大小。当血管瘤较大且合并危险因素时，建议酌情治疗。肝血管瘤一点都不可怕，不会直接导致死亡，发现之后要保持平和心态。平时要避免过度劳累和剧烈运动，不要让肝区受到外力碰撞以免肝血管瘤破裂而出现严重的并发症。要定期去医院作复查。手术切除是最彻底的方法，此外还有局部消融术、肝动脉介入栓塞术等方法可以治疗肝血管瘤。口服药对较大的血管瘤效果不佳。这些治疗方法都有其相应的适应症与禁忌症，建议到正规医院就诊后评估病情，必要时多学科会诊联合评估，决定进一步治疗方案。
去年单位体检还没有发现有肝血管瘤今年体检医生告诉我有5.7公分大的肝	肝血管瘤作为一种良性肿瘤，大多无症状，且无恶变倾向，原则上以随访观察为主。这是目前国内外普遍接受的观念。肝血管瘤严重程度取决于肝血管瘤的生长速度和大小。当血管瘤较大且合并危险因素时，建议酌情治疗。肝血管瘤一点都不可怕，不会直接导致死亡，发现之后要保持平和心态。平时要避免过度劳累和剧烈运动，不要让肝区受到外力碰撞以免肝血管瘤破裂而出现严重的并发症。要定期去医院作复查。手术切除是最彻底的方法，此外还有局部消融术、肝动脉介入栓塞术等方法可以治疗肝血管瘤。口服药对较大的血管瘤效果不佳。这些治疗方法都有其相应的适应症与禁忌症，建议到正规医院就诊后评估病情，必要时多学科会诊联合评估，决定进一步治疗方案。
我有肝血管瘤大小是7X6mm有什么好的治疗方案？	肝血管瘤作为一种良性肿瘤，大多无症状，且无恶变倾向，原则上以随访观察为主。这是目前国内外普遍接受的观念。肝血管瘤严重程度取决于肝血管瘤的生长速度和大小。当血管瘤较大且合并危险因素时，建议酌情治疗。肝血管瘤一点都不可怕，不会直接导致死亡，发现之后要保持平和心态。平时要避免过度劳累和剧烈运动，不要让肝区受到外力碰撞以免肝血管瘤破裂而出现严重的并发症。要定期去医院作复查。手术切除是最彻底的方法，此外还有局部消融术、肝动脉介入栓塞术等方法可以治疗肝血管瘤。口服药对较大的血管瘤效果不佳。这些治疗方法都有其相应的适应症与禁忌症，建议到正规医院就诊后评估病情，必要时多学科会诊联合评估，决定进一步治疗方案。
肝血管瘤多发怎么治疗最好？	肝血管瘤作为一种良性肿瘤，大多无症状，且无恶变倾向，原则上以随访观察为主。这是目前国内外普遍接受的观念。肝血管瘤严重程度取决于肝血管瘤的生长速度和大小。当血管瘤较大且合并危险因素时，建议酌情治疗。肝血管瘤一点都不可怕，不会直接导致死亡，发现之后要保持平和心态。平时要避免过度劳累和剧烈运动，不要让肝区受到外力碰撞以免肝血管瘤破裂而出现严重的并发症。要定期去医院作复查。手术切除是最彻底的方法，此外还有局部消融术、肝动脉介入栓塞术等方法可以治疗肝血管瘤。口服药对较大的血管瘤效果不佳。这些治疗方法都有其相应的适应症与禁忌症，建议到正规医院就诊后评估病情，必要时多学科会诊联合评估，决定进一步治疗方案。
右肝瓣上有一个一厘米的血管瘤怎么办?	肝血管瘤作为一种良性肿瘤，大多无症状，且无恶变倾向，原则上以随访观察为主。这是目前国内外普遍接受的观念。肝血管瘤严重程度取决于肝血管瘤的生长速度和大小。当血管瘤较大且合并危险因素时，建议酌情治疗。肝血管瘤一点都不可怕，不会直接导致死亡，发现之后要保持平和心态。平时要避免过度劳累和剧烈运动，不要让肝区受到外力碰撞以免肝血管瘤破裂而出现严重的并发症。要定期去医院作复查。手术切除是最彻底的方法，此外还有局部消融术、肝动脉介入栓塞术等方法可以治疗肝血管瘤。口服药对较大的血管瘤效果不佳。这些治疗方法都有其相应的适应症与禁忌症，建议到正规医院就诊后评估病情，必要时多学科会诊联合评估，决定进一步治疗方案。
关于肝上长1个２.６厘米的血管瘤应注意什么	肝血管瘤作为一种良性肿瘤，大多无症状，且无恶变倾向，原则上以随访观察为主。这是目前国内外普遍接受的观念。肝血管瘤严重程度取决于肝血管瘤的生长速度和大小。当血管瘤较大且合并危险因素时，建议酌情治疗。肝血管瘤一点都不可怕，不会直接导致死亡，发现之后要保持平和心态。平时要避免过度劳累和剧烈运动，不要让肝区受到外力碰撞以免肝血管瘤破裂而出现严重的并发症。要定期去医院作复查。手术切除是最彻底的方法，此外还有局部消融术、肝动脉介入栓塞术等方法可以治疗肝血管瘤。口服药对较大的血管瘤效果不佳。这些治疗方法都有其相应的适应症与禁忌症，建议到正规医院就诊后评估病情，必要时多学科会诊联合评估，决定进一步治疗方案。
你好，请问肝血管瘤1cm内问题大吗	肝血管瘤作为一种良性肿瘤，大多无症状，且无恶变倾向，原则上以随访观察为主。这是目前国内外普遍接受的观念。肝血管瘤严重程度取决于肝血管瘤的生长速度和大小。当血管瘤较大且合并危险因素时，建议酌情治疗。肝血管瘤一点都不可怕，不会直接导致死亡，发现之后要保持平和心态。平时要避免过度劳累和剧烈运动，不要让肝区受到外力碰撞以免肝血管瘤破裂而出现严重的并发症。要定期去医院作复查。手术切除是最彻底的方法，此外还有局部消融术、肝动脉介入栓塞术等方法可以治疗肝血管瘤。口服药对较大的血管瘤效果不佳。这些治疗方法都有其相应的适应症与禁忌症，建议到正规医院就诊后评估病情，必要时多学科会诊联合评估，决定进一步治疗方案。
我肝右叶上长了一个8*9MM的血管瘤怎么办	肝血管瘤作为一种良性肿瘤，大多无症状，且无恶变倾向，原则上以随访观察为主。这是目前国内外普遍接受的观念。肝血管瘤严重程度取决于肝血管瘤的生长速度和大小。当血管瘤较大且合并危险因素时，建议酌情治疗。肝血管瘤一点都不可怕，不会直接导致死亡，发现之后要保持平和心态。平时要避免过度劳累和剧烈运动，不要让肝区受到外力碰撞以免肝血管瘤破裂而出现严重的并发症。要定期去医院作复查。手术切除是最彻底的方法，此外还有局部消融术、肝动脉介入栓塞术等方法可以治疗肝血管瘤。口服药对较大的血管瘤效果不佳。这些治疗方法都有其相应的适应症与禁忌症，建议到正规医院就诊后评估病情，必要时多学科会诊联合评估，决定进一步治疗方案。
体检查出肝上有个血管瘤，怎么办	肝血管瘤作为一种良性肿瘤，大多无症状，且无恶变倾向，原则上以随访观察为主。这是目前国内外普遍接受的观念。肝血管瘤严重程度取决于肝血管瘤的生长速度和大小。当血管瘤较大且合并危险因素时，建议酌情治疗。肝血管瘤一点都不可怕，不会直接导致死亡，发现之后要保持平和心态。平时要避免过度劳累和剧烈运动，不要让肝区受到外力碰撞以免肝血管瘤破裂而出现严重的并发症。要定期去医院作复查。手术切除是最彻底的方法，此外还有局部消融术、肝动脉介入栓塞术等方法可以治疗肝血管瘤。口服药对较大的血管瘤效果不佳。这些治疗方法都有其相应的适应症与禁忌症，建议到正规医院就诊后评估病情，必要时多学科会诊联合评估，决定进一步治疗方案。
体检发现有肝血管瘤，不到一厘米大，怎么办	肝血管瘤作为一种良性肿瘤，大多无症状，且无恶变倾向，原则上以随访观察为主。这是目前国内外普遍接受的观念。肝血管瘤严重程度取决于肝血管瘤的生长速度和大小。当血管瘤较大且合并危险因素时，建议酌情治疗。肝血管瘤一点都不可怕，不会直接导致死亡，发现之后要保持平和心态。平时要避免过度劳累和剧烈运动，不要让肝区受到外力碰撞以免肝血管瘤破裂而出现严重的并发症。要定期去医院作复查。手术切除是最彻底的方法，此外还有局部消融术、肝动脉介入栓塞术等方法可以治疗肝血管瘤。口服药对较大的血管瘤效果不佳。这些治疗方法都有其相应的适应症与禁忌症，建议到正规医院就诊后评估病情，必要时多学科会诊联合评估，决定进一步治疗方案。
我得了肝血管瘤，怎么办才好？	肝血管瘤作为一种良性肿瘤，大多无症状，且无恶变倾向，原则上以随访观察为主。这是目前国内外普遍接受的观念。肝血管瘤严重程度取决于肝血管瘤的生长速度和大小。当血管瘤较大且合并危险因素时，建议酌情治疗。肝血管瘤一点都不可怕，不会直接导致死亡，发现之后要保持平和心态。平时要避免过度劳累和剧烈运动，不要让肝区受到外力碰撞以免肝血管瘤破裂而出现严重的并发症。要定期去医院作复查。手术切除是最彻底的方法，此外还有局部消融术、肝动脉介入栓塞术等方法可以治疗肝血管瘤。口服药对较大的血管瘤效果不佳。这些治疗方法都有其相应的适应症与禁忌症，建议到正规医院就诊后评估病情，必要时多学科会诊联合评估，决定进一步治疗方案。
我的右肝上长了血管瘤该怎么办？	肝血管瘤作为一种良性肿瘤，大多无症状，且无恶变倾向，原则上以随访观察为主。这是目前国内外普遍接受的观念。肝血管瘤严重程度取决于肝血管瘤的生长速度和大小。当血管瘤较大且合并危险因素时，建议酌情治疗。肝血管瘤一点都不可怕，不会直接导致死亡，发现之后要保持平和心态。平时要避免过度劳累和剧烈运动，不要让肝区受到外力碰撞以免肝血管瘤破裂而出现严重的并发症。要定期去医院作复查。手术切除是最彻底的方法，此外还有局部消融术、肝动脉介入栓塞术等方法可以治疗肝血管瘤。口服药对较大的血管瘤效果不佳。这些治疗方法都有其相应的适应症与禁忌症，建议到正规医院就诊后评估病情，必要时多学科会诊联合评估，决定进一步治疗方案。
我的肝右后叶长了一个9厘米*7厘米*6厘米的血管瘤没有任何感觉用治	肝血管瘤作为一种良性肿瘤，大多无症状，且无恶变倾向，原则上以随访观察为主。这是目前国内外普遍接受的观念。肝血管瘤严重程度取决于肝血管瘤的生长速度和大小。当血管瘤较大且合并危险因素时，建议酌情治疗。肝血管瘤一点都不可怕，不会直接导致死亡，发现之后要保持平和心态。平时要避免过度劳累和剧烈运动，不要让肝区受到外力碰撞以免肝血管瘤破裂而出现严重的并发症。要定期去医院作复查。手术切除是最彻底的方法，此外还有局部消融术、肝动脉介入栓塞术等方法可以治疗肝血管瘤。口服药对较大的血管瘤效果不佳。这些治疗方法都有其相应的适应症与禁忌症，建议到正规医院就诊后评估病情，必要时多学科会诊联合评估，决定进一步治疗方案。
彩超肝脏血管瘤严重吗？	肝血管瘤作为一种良性肿瘤，大多无症状，且无恶变倾向，原则上以随访观察为主。这是目前国内外普遍接受的观念。肝血管瘤严重程度取决于肝血管瘤的生长速度和大小。当血管瘤较大且合并危险因素时，建议酌情治疗。肝血管瘤一点都不可怕，不会直接导致死亡，发现之后要保持平和心态。平时要避免过度劳累和剧烈运动，不要让肝区受到外力碰撞以免肝血管瘤破裂而出现严重的并发症。要定期去医院作复查。手术切除是最彻底的方法，此外还有局部消融术、肝动脉介入栓塞术等方法可以治疗肝血管瘤。口服药对较大的血管瘤效果不佳。这些治疗方法都有其相应的适应症与禁忌症，建议到正规医院就诊后评估病情，必要时多学科会诊联合评估，决定进一步治疗方案。
肝血管瘤如果不继续长大需要治疗吗？	肝血管瘤作为一种良性肿瘤，大多无症状，且无恶变倾向，原则上以随访观察为主。这是目前国内外普遍接受的观念。肝血管瘤严重程度取决于肝血管瘤的生长速度和大小。当血管瘤较大且合并危险因素时，建议酌情治疗。肝血管瘤一点都不可怕，不会直接导致死亡，发现之后要保持平和心态。平时要避免过度劳累和剧烈运动，不要让肝区受到外力碰撞以免肝血管瘤破裂而出现严重的并发症。要定期去医院作复查。手术切除是最彻底的方法，此外还有局部消融术、肝动脉介入栓塞术等方法可以治疗肝血管瘤。口服药对较大的血管瘤效果不佳。这些治疗方法都有其相应的适应症与禁忌症，建议到正规医院就诊后评估病情，必要时多学科会诊联合评估，决定进一步治疗方案。
我的肝血管瘤生长的速度很快怎么办？	肝血管瘤作为一种良性肿瘤，大多无症状，且无恶变倾向，原则上以随访观察为主。这是目前国内外普遍接受的观念。肝血管瘤严重程度取决于肝血管瘤的生长速度和大小。当血管瘤较大且合并危险因素时，建议酌情治疗。肝血管瘤一点都不可怕，不会直接导致死亡，发现之后要保持平和心态。平时要避免过度劳累和剧烈运动，不要让肝区受到外力碰撞以免肝血管瘤破裂而出现严重的并发症。要定期去医院作复查。手术切除是最彻底的方法，此外还有局部消融术、肝动脉介入栓塞术等方法可以治疗肝血管瘤。口服药对较大的血管瘤效果不佳。这些治疗方法都有其相应的适应症与禁忌症，建议到正规医院就诊后评估病情，必要时多学科会诊联合评估，决定进一步治疗方案。
我得了肝血管瘤需要住院治疗吗？	肝血管瘤作为一种良性肿瘤，大多无症状，且无恶变倾向，原则上以随访观察为主。这是目前国内外普遍接受的观念。肝血管瘤严重程度取决于肝血管瘤的生长速度和大小。当血管瘤较大且合并危险因素时，建议酌情治疗。肝血管瘤一点都不可怕，不会直接导致死亡，发现之后要保持平和心态。平时要避免过度劳累和剧烈运动，不要让肝区受到外力碰撞以免肝血管瘤破裂而出现严重的并发症。要定期去医院作复查。手术切除是最彻底的方法，此外还有局部消融术、肝动脉介入栓塞术等方法可以治疗肝血管瘤。口服药对较大的血管瘤效果不佳。这些治疗方法都有其相应的适应症与禁忌症，建议到正规医院就诊后评估病情，必要时多学科会诊联合评估，决定进一步治疗方案。
男性得了肝血管瘤应该怎么治	肝血管瘤作为一种良性肿瘤，大多无症状，且无恶变倾向，原则上以随访观察为主。这是目前国内外普遍接受的观念。肝血管瘤严重程度取决于肝血管瘤的生长速度和大小。当血管瘤较大且合并危险因素时，建议酌情治疗。肝血管瘤一点都不可怕，不会直接导致死亡，发现之后要保持平和心态。平时要避免过度劳累和剧烈运动，不要让肝区受到外力碰撞以免肝血管瘤破裂而出现严重的并发症。要定期去医院作复查。手术切除是最彻底的方法，此外还有局部消融术、肝动脉介入栓塞术等方法可以治疗肝血管瘤。口服药对较大的血管瘤效果不佳。这些治疗方法都有其相应的适应症与禁忌症，建议到正规医院就诊后评估病情，必要时多学科会诊联合评估，决定进一步治疗方案。
我靠近右肝上长了一个5厘米的血管瘤有危险吗	肝血管瘤作为一种良性肿瘤，大多无症状，且无恶变倾向，原则上以随访观察为主。这是目前国内外普遍接受的观念。肝血管瘤严重程度取决于肝血管瘤的生长速度和大小。当血管瘤较大且合并危险因素时，建议酌情治疗。肝血管瘤一点都不可怕，不会直接导致死亡，发现之后要保持平和心态。平时要避免过度劳累和剧烈运动，不要让肝区受到外力碰撞以免肝血管瘤破裂而出现严重的并发症。要定期去医院作复查。手术切除是最彻底的方法，此外还有局部消融术、肝动脉介入栓塞术等方法可以治疗肝血管瘤。口服药对较大的血管瘤效果不佳。这些治疗方法都有其相应的适应症与禁忌症，建议到正规医院就诊后评估病情，必要时多学科会诊联合评估，决定进一步治疗方案。
我体检发现肝右叶血管瘤怎么治疗	肝血管瘤作为一种良性肿瘤，大多无症状，且无恶变倾向，原则上以随访观察为主。这是目前国内外普遍接受的观念。肝血管瘤严重程度取决于肝血管瘤的生长速度和大小。当血管瘤较大且合并危险因素时，建议酌情治疗。肝血管瘤一点都不可怕，不会直接导致死亡，发现之后要保持平和心态。平时要避免过度劳累和剧烈运动，不要让肝区受到外力碰撞以免肝血管瘤破裂而出现严重的并发症。要定期去医院作复查。手术切除是最彻底的方法，此外还有局部消融术、肝动脉介入栓塞术等方法可以治疗肝血管瘤。口服药对较大的血管瘤效果不佳。这些治疗方法都有其相应的适应症与禁忌症，建议到正规医院就诊后评估病情，必要时多学科会诊联合评估，决定进一步治疗方案。
我有肝血管瘤1.1x1.2需要治	肝血管瘤作为一种良性肿瘤，大多无症状，且无恶变倾向，原则上以随访观察为主。这是目前国内外普遍接受的观念。肝血管瘤严重程度取决于肝血管瘤的生长速度和大小。当血管瘤较大且合并危险因素时，建议酌情治疗。肝血管瘤一点都不可怕，不会直接导致死亡，发现之后要保持平和心态。平时要避免过度劳累和剧烈运动，不要让肝区受到外力碰撞以免肝血管瘤破裂而出现严重的并发症。要定期去医院作复查。手术切除是最彻底的方法，此外还有局部消融术、肝动脉介入栓塞术等方法可以治疗肝血管瘤。口服药对较大的血管瘤效果不佳。这些治疗方法都有其相应的适应症与禁忌症，建议到正规医院就诊后评估病情，必要时多学科会诊联合评估，决定进一步治疗方案。
我有肝血管瘤病症，转氨酶也较高，但经检查不是肝癌，该怎么治疗？	肝血管瘤作为一种良性肿瘤，大多无症状，且无恶变倾向，原则上以随访观察为主。这是目前国内外普遍接受的观念。肝血管瘤严重程度取决于肝血管瘤的生长速度和大小。当血管瘤较大且合并危险因素时，建议酌情治疗。肝血管瘤一点都不可怕，不会直接导致死亡，发现之后要保持平和心态。平时要避免过度劳累和剧烈运动，不要让肝区受到外力碰撞以免肝血管瘤破裂而出现严重的并发症。要定期去医院作复查。手术切除是最彻底的方法，此外还有局部消融术、肝动脉介入栓塞术等方法可以治疗肝血管瘤。口服药对较大的血管瘤效果不佳。这些治疗方法都有其相应的适应症与禁忌症，建议到正规医院就诊后评估病情，必要时多学科会诊联合评估，决定进一步治疗方案。
右边肝上有血管瘤怎么办？	肝血管瘤作为一种良性肿瘤，大多无症状，且无恶变倾向，原则上以随访观察为主。这是目前国内外普遍接受的观念。肝血管瘤严重程度取决于肝血管瘤的生长速度和大小。当血管瘤较大且合并危险因素时，建议酌情治疗。肝血管瘤一点都不可怕，不会直接导致死亡，发现之后要保持平和心态。平时要避免过度劳累和剧烈运动，不要让肝区受到外力碰撞以免肝血管瘤破裂而出现严重的并发症。要定期去医院作复查。手术切除是最彻底的方法，此外还有局部消融术、肝动脉介入栓塞术等方法可以治疗肝血管瘤。口服药对较大的血管瘤效果不佳。这些治疗方法都有其相应的适应症与禁忌症，建议到正规医院就诊后评估病情，必要时多学科会诊联合评估，决定进一步治疗方案。
肝囊肿、肝血管瘤需要治疗吗	肝血管瘤作为一种良性肿瘤，大多无症状，且无恶变倾向，原则上以随访观察为主。这是目前国内外普遍接受的观念。肝血管瘤严重程度取决于肝血管瘤的生长速度和大小。当血管瘤较大且合并危险因素时，建议酌情治疗。肝血管瘤一点都不可怕，不会直接导致死亡，发现之后要保持平和心态。平时要避免过度劳累和剧烈运动，不要让肝区受到外力碰撞以免肝血管瘤破裂而出现严重的并发症。要定期去医院作复查。手术切除是最彻底的方法，此外还有局部消融术、肝动脉介入栓塞术等方法可以治疗肝血管瘤。口服药对较大的血管瘤效果不佳。这些治疗方法都有其相应的适应症与禁忌症，建议到正规医院就诊后评估病情，必要时多学科会诊联合评估，决定进一步治疗方案。
肝囊肿和肝血管瘤的诊断和治疗	肝血管瘤作为一种良性肿瘤，大多无症状，且无恶变倾向，原则上以随访观察为主。这是目前国内外普遍接受的观念。肝血管瘤严重程度取决于肝血管瘤的生长速度和大小。当血管瘤较大且合并危险因素时，建议酌情治疗。肝血管瘤一点都不可怕，不会直接导致死亡，发现之后要保持平和心态。平时要避免过度劳累和剧烈运动，不要让肝区受到外力碰撞以免肝血管瘤破裂而出现严重的并发症。要定期去医院作复查。手术切除是最彻底的方法，此外还有局部消融术、肝动脉介入栓塞术等方法可以治疗肝血管瘤。口服药对较大的血管瘤效果不佳。这些治疗方法都有其相应的适应症与禁忌症，建议到正规医院就诊后评估病情，必要时多学科会诊联合评估，决定进一步治疗方案。
肝内血管瘤，肝内有多个，较大的12*1.怎么治疗	肝血管瘤作为一种良性肿瘤，大多无症状，且无恶变倾向，原则上以随访观察为主。这是目前国内外普遍接受的观念。肝血管瘤严重程度取决于肝血管瘤的生长速度和大小。当血管瘤较大且合并危险因素时，建议酌情治疗。肝血管瘤一点都不可怕，不会直接导致死亡，发现之后要保持平和心态。平时要避免过度劳累和剧烈运动，不要让肝区受到外力碰撞以免肝血管瘤破裂而出现严重的并发症。要定期去医院作复查。手术切除是最彻底的方法，此外还有局部消融术、肝动脉介入栓塞术等方法可以治疗肝血管瘤。口服药对较大的血管瘤效果不佳。这些治疗方法都有其相应的适应症与禁忌症，建议到正规医院就诊后评估病情，必要时多学科会诊联合评估，决定进一步治疗方案。
肝上有2个血管瘤怎么办？	肝血管瘤作为一种良性肿瘤，大多无症状，且无恶变倾向，原则上以随访观察为主。这是目前国内外普遍接受的观念。肝血管瘤严重程度取决于肝血管瘤的生长速度和大小。当血管瘤较大且合并危险因素时，建议酌情治疗。肝血管瘤一点都不可怕，不会直接导致死亡，发现之后要保持平和心态。平时要避免过度劳累和剧烈运动，不要让肝区受到外力碰撞以免肝血管瘤破裂而出现严重的并发症。要定期去医院作复查。手术切除是最彻底的方法，此外还有局部消融术、肝动脉介入栓塞术等方法可以治疗肝血管瘤。口服药对较大的血管瘤效果不佳。这些治疗方法都有其相应的适应症与禁忌症，建议到正规医院就诊后评估病情，必要时多学科会诊联合评估，决定进一步治疗方案。
肝上有个8公分大的血管瘤对人危害严重吗	肝血管瘤作为一种良性肿瘤，大多无症状，且无恶变倾向，原则上以随访观察为主。这是目前国内外普遍接受的观念。肝血管瘤严重程度取决于肝血管瘤的生长速度和大小。当血管瘤较大且合并危险因素时，建议酌情治疗。肝血管瘤一点都不可怕，不会直接导致死亡，发现之后要保持平和心态。平时要避免过度劳累和剧烈运动，不要让肝区受到外力碰撞以免肝血管瘤破裂而出现严重的并发症。要定期去医院作复查。手术切除是最彻底的方法，此外还有局部消融术、肝动脉介入栓塞术等方法可以治疗肝血管瘤。口服药对较大的血管瘤效果不佳。这些治疗方法都有其相应的适应症与禁忌症，建议到正规医院就诊后评估病情，必要时多学科会诊联合评估，决定进一步治疗方案。
肝上长了3厘米大的血管瘤怎么办？	肝血管瘤作为一种良性肿瘤，大多无症状，且无恶变倾向，原则上以随访观察为主。这是目前国内外普遍接受的观念。肝血管瘤严重程度取决于肝血管瘤的生长速度和大小。当血管瘤较大且合并危险因素时，建议酌情治疗。肝血管瘤一点都不可怕，不会直接导致死亡，发现之后要保持平和心态。平时要避免过度劳累和剧烈运动，不要让肝区受到外力碰撞以免肝血管瘤破裂而出现严重的并发症。要定期去医院作复查。手术切除是最彻底的方法，此外还有局部消融术、肝动脉介入栓塞术等方法可以治疗肝血管瘤。口服药对较大的血管瘤效果不佳。这些治疗方法都有其相应的适应症与禁忌症，建议到正规医院就诊后评估病情，必要时多学科会诊联合评估，决定进一步治疗方案。
肝上长了个血管瘤怎么办？	肝血管瘤作为一种良性肿瘤，大多无症状，且无恶变倾向，原则上以随访观察为主。这是目前国内外普遍接受的观念。肝血管瘤严重程度取决于肝血管瘤的生长速度和大小。当血管瘤较大且合并危险因素时，建议酌情治疗。肝血管瘤一点都不可怕，不会直接导致死亡，发现之后要保持平和心态。平时要避免过度劳累和剧烈运动，不要让肝区受到外力碰撞以免肝血管瘤破裂而出现严重的并发症。要定期去医院作复查。手术切除是最彻底的方法，此外还有局部消融术、肝动脉介入栓塞术等方法可以治疗肝血管瘤。口服药对较大的血管瘤效果不佳。这些治疗方法都有其相应的适应症与禁忌症，建议到正规医院就诊后评估病情，必要时多学科会诊联合评估，决定进一步治疗方案。
肝上长血管瘤危险吗？	肝血管瘤作为一种良性肿瘤，大多无症状，且无恶变倾向，原则上以随访观察为主。这是目前国内外普遍接受的观念。肝血管瘤严重程度取决于肝血管瘤的生长速度和大小。当血管瘤较大且合并危险因素时，建议酌情治疗。肝血管瘤一点都不可怕，不会直接导致死亡，发现之后要保持平和心态。平时要避免过度劳累和剧烈运动，不要让肝区受到外力碰撞以免肝血管瘤破裂而出现严重的并发症。要定期去医院作复查。手术切除是最彻底的方法，此外还有局部消融术、肝动脉介入栓塞术等方法可以治疗肝血管瘤。口服药对较大的血管瘤效果不佳。这些治疗方法都有其相应的适应症与禁忌症，建议到正规医院就诊后评估病情，必要时多学科会诊联合评估，决定进一步治疗方案。
肝血管瘤应该挂哪个科？	肝血管瘤作为一种良性肿瘤，大多无症状，且无恶变倾向，原则上以随访观察为主。这是目前国内外普遍接受的观念。肝血管瘤严重程度取决于肝血管瘤的生长速度和大小。当血管瘤较大且合并危险因素时，建议酌情治疗。建议到正规医院挂肝胆外科或普外科诊治。
肝血管瘤的微创手术	当前手术方式可分为传统开腹手术和现代微创手术，但微创手术并不能适合每个人。不管是腹腔镜微创还是机器人微创，都有其手术禁忌症。微创手术绝对禁忌症有：1、不能耐受气管插管的麻醉患者；2、患者一般情况严重不宜做手术；3、有心血管疾病不能做人工气腹的患者；4、腹腔疝或膈疝；5、胃肠明显胀气如各种原因导致的肠梗阻、肠管扩张和其它不能穿刺的情况，如晚期弥漫性腹膜炎、腹腔广泛粘连等；6、无微创手术空间，如肝顶肿瘤近膈肌。相对手术禁忌症有：1、腹部手术史；2、肥胖；3、急慢性腹盆腔炎史；4、巨大肿瘤；5、手术者技术及经验不足。随着科技进步，腹腔镜及机器人的设计不断完善，微创手术的相对禁忌症有了一定程度的减少。具体到个人是否适合微创手术还需要去医院由经验丰富的医生进行判断。
肝血管瘤9公分多发性的能做微创手术吗	当前手术方式可分为传统开腹手术和现代微创手术，但微创手术并不能适合每个人。不管是腹腔镜微创还是机器人微创，都有其手术禁忌症。微创手术绝对禁忌症有：1、不能耐受气管插管的麻醉患者；2、患者一般情况严重不宜做手术；3、有心血管疾病不能做人工气腹的患者；4、腹腔疝或膈疝；5、胃肠明显胀气如各种原因导致的肠梗阻、肠管扩张和其它不能穿刺的情况，如晚期弥漫性腹膜炎、腹腔广泛粘连等；6、无微创手术空间，如肝顶肿瘤近膈肌。相对手术禁忌症有：1、腹部手术史；2、肥胖；3、急慢性腹盆腔炎史；4、巨大肿瘤；5、手术者技术及经验不足。随着科技进步，腹腔镜及机器人的设计不断完善，微创手术的相对禁忌症有了一定程度的减少。具体到个人是否适合微创手术还需要去医院由经验丰富的医生进行判断。
肝血管瘤大于5cm是否可以做微创手术？	当前手术方式可分为传统开腹手术和现代微创手术，但微创手术并不能适合每个人。不管是腹腔镜微创还是机器人微创，都有其手术禁忌症。微创手术绝对禁忌症有：1、不能耐受气管插管的麻醉患者；2、患者一般情况严重不宜做手术；3、有心血管疾病不能做人工气腹的患者；4、腹腔疝或膈疝；5、胃肠明显胀气如各种原因导致的肠梗阻、肠管扩张和其它不能穿刺的情况，如晚期弥漫性腹膜炎、腹腔广泛粘连等；6、无微创手术空间，如肝顶肿瘤近膈肌。相对手术禁忌症有：1、腹部手术史；2、肥胖；3、急慢性腹盆腔炎史；4、巨大肿瘤；5、手术者技术及经验
肝血管瘤是微创介导术还是开刀手术效果好	当前手术方式可分为传统开腹手术和现代微创手术，但微创手术并不能适合每个人。不管是腹腔镜微创还是机器人微创，都有其手术禁忌症。微创手术绝对禁忌症有：1、不能耐受气管插管的麻醉患者；2、患者一般情况严重不宜做手术；3、有心血管疾病不能做人工气腹的患者；4、腹腔疝或膈疝；5、胃肠明显胀气如各种原因导致的肠梗阻、肠管扩张和其它不能穿刺的情况，如晚期弥漫性腹膜炎、腹腔广泛粘连等；6、无微创手术空间，如肝顶肿瘤近膈肌。相对手术禁忌症有：1、腹部手术史；2、肥胖；3、急慢性腹盆腔炎史；4、巨大肿瘤；5、手术者技术及经验。随着科技进步，腹腔镜及机器人的设计不断完善，微创手术的相对禁忌症有了一定程度的减少。具体到个人是否适合微创手术还需要去医院由经验丰富的医生进行判断。
肝血管瘤微创腹腔镜手术危险吗？	当前手术方式可分为传统开腹手术和现代微创手术，但微创手术并不能适合每个人。不管是腹腔镜微创还是机器人微创，都有其手术禁忌症。微创手术绝对禁忌症有：1、不能耐受气管插管的麻醉患者；2、患者一般情况严重不宜做手术；3、有心血管疾病不能做人工气腹的患者；4、腹腔疝或膈疝；5、胃肠明显胀气如各种原因导致的肠梗阻、肠管扩张和其它不能穿刺的情况，如晚期弥漫性腹膜炎、腹腔广泛粘连等；6、无微创手术空间，如肝顶肿瘤近膈肌。相对手术禁忌症有：1、腹部手术史；2、肥胖；3、急慢性腹盆腔炎史；4、巨大肿瘤；5、手术者技术及经验
肝肿瘤大于5厘米用微创好还是手术好	当前手术方式可分为传统开腹手术和现代微创手术，但微创手术并不能适合每个人。不管是腹腔镜微创还是机器人微创，都有其手术禁忌症。微创手术绝对禁忌症有：1、不能耐受气管插管的麻醉患者；2、患者一般情况严重不宜做手术；3、有心血管疾病不能做人工气腹的患者；4、腹腔疝或膈疝；5、胃肠明显胀气如各种原因导致的肠梗阻、肠管扩张和其它不能穿刺的情况，如晚期弥漫性腹膜炎、腹腔广泛粘连等；6、无微创手术空间，如肝顶肿瘤近膈肌。相对手术禁忌症有：1、腹部手术史；2、肥胖；3、急慢性腹盆腔炎史；4、巨大肿瘤；5、手术者技术及经验
肝血管瘤，微创手术最好吗？	当前手术方式可分为传统开腹手术和现代微创手术，但微创手术并不能适合每个人。不管是腹腔镜微创还是机器人微创，都有其手术禁忌症。微创手术绝对禁忌症有：1、不能耐受气管插管的麻醉患者；2、患者一般情况严重不宜做手术；3、有心血管疾病不能做人工气腹的患者；4、腹腔疝或膈疝；5、胃肠明显胀气如各种原因导致的肠梗阻、肠管扩张和其它不能穿刺的情况，如晚期弥漫性腹膜炎、腹腔广泛粘连等；6、无微创手术空间，如肝顶肿瘤近膈肌。相对手术禁忌症有：1、腹部手术史；2、肥胖；3、急慢性腹盆腔炎史；4、巨大肿瘤；5、手术者技术及经验。随着科技进步，腹腔镜及机器人的设计不断完善，微创手术的相对禁忌症有了一定程度的减少。具体到个人是否适合微创手术还需要去医院由经验丰富的医生进行判断。
肝部血管瘤能做微创手术吗？	当前手术方式可分为传统开腹手术和现代微创手术，但微创手术并不能适合每个人。不管是腹腔镜微创还是机器人微创，都有其手术禁忌症。微创手术绝对禁忌症有：1、不能耐受气管插管的麻醉患者；2、患者一般情况严重不宜做手术；3、有心血管疾病不能做人工气腹的患者；4、腹腔疝或膈疝；5、胃肠明显胀气如各种原因导致的肠梗阻、肠管扩张和其它不能穿刺的情况，如晚期弥漫性腹膜炎、腹腔广泛粘连等；6、无微创手术空间，如肝顶肿瘤近膈肌。相对手术禁忌症有：1、腹部手术史；2、肥胖；3、急慢性腹盆腔炎史；4、巨大肿瘤；5、手术者技术及经验。随着科技进步，腹腔镜及机器人的设计不断完善，微创手术的相对禁忌症有了一定程度的减少。具体到个人是否适合微创手术还需要去医院由经验丰富的医生进行判断。ᶚᩘ
肝血管瘤进行手术有危险吗？	肝血管瘤作为一种较为常见的肝良性肿瘤。手术切除治疗肝血管瘤是目前认为最为确切的治疗手段，但应严格把握切除指征。肝血管瘤手术治疗具有一定风险，包括1、麻醉并发症：严重可导致休克，危及生命；2、术中出现难以控制的出血等情况，导致术中大出血，失血性休克，严重者死亡；3、术中损伤临近神经、血管、或临近器官，如胆管、肾、肾上腺等，导致胆瘘、肠瘘等情况出现，一旦形成需长期留置引流管；4、术后手术部位出血，可能需要行二次手术或介入栓塞治疗；5、心脏并发症：心力衰竭、心率失常、心脏骤停危及生命等；6、深静脉血栓及肺栓塞、脑栓塞可能；7、术后切口感染，延迟愈合；8、术后腹腔感染，原发性腹膜炎，需行相应治疗措施。肿瘤直径大小和部位、肝组织切除量、术中出血量以及输血情况等是影响肝血管瘤术后并发症的危险因素，但手术风险主要与术中失血量有关。
做肝血管瘤7~8厘米做手术风险大么?	肝血管瘤作为一种较为常见的肝良性肿瘤。手术切除治疗肝血管瘤是目前认为最为确切的治疗手段，但应严格把握切除指征。肝血管瘤手术治疗具有一定风险，包括1、麻醉并发症：严重可导致休克，危及生命；2、术中出现难以控制的出血等情况，导致术中大出血，失血性休克，严重者死亡；3、术中损伤临近神经、血管、或临近器官，如胆管、肾、肾上腺等，导致胆瘘、肠瘘等情况出现，一旦形成需长期留置引流管；4、术后手术部位出血，可能需要行二次手术或介入栓塞治疗；5、心脏并发症：心力衰竭、心率失常、心脏骤停危及生命等；6、深静脉血栓及肺栓塞、脑栓塞可能；7、术后切口感染，延迟愈合；8、术后腹腔感染，原发性腹膜炎，需行相应治疗措施。肿瘤直径大小和部位、肝组织切除量、术中出血量以及输血情况等是影响肝血管瘤术后并发症的危险因素，但手术风险主要与术中失血量有关。
肝脏上的血管瘤手术成功机率有多大	肝血管瘤作为一种较为常见的肝良性肿瘤。手术切除治疗肝血管瘤是目前认为最为确切的治疗手段，但应严格把握切除指征。肝血管瘤手术治疗具有一定风险，包括1、麻醉并发症：严重可导致休克，危及生命；2、术中出现难以控制的出血等情况，导致术中大出血，失血性休克，严重者死亡；3、术中损伤临近神经、血管、或临近器官，如胆管、肾、肾上腺等，导致胆瘘、肠瘘等情况出现，一旦形成需长期留置引流管；4、术后手术部位出血，可能需要行二次手术或介入栓塞治疗；5、心脏并发症：心力衰竭、心率失常、心脏骤停危及生命等；6、深静脉血栓及肺栓塞、脑栓塞可能；7、术后切口感染，延迟愈合；8、术后腹腔感染，原发性腹膜炎，需行相应治疗措施。肿瘤直径大小和部位、肝组织切除量、术中出血量以及输血情况等是影响肝血管瘤术后并发症的危险因素，但手术风险主要与术中失血量有关。
肝血管瘤的手术风险大吗	肝血管瘤作为一种较为常见的肝良性肿瘤。手术切除治疗肝血管瘤是目前认为最为确切的治疗手段，但应严格把握切除指征。肝血管瘤手术治疗具有一定风险，包括1、麻醉并发症：严重可导致休克，危及生命；2、术中出现难以控制的出血等情况，导致术中大出血，失血性休克，严重者死亡；3、术中损伤临近神经、血管、或临近器官，如胆管、肾、肾上腺等，导致胆瘘、肠瘘等情况出现，一旦形成需长期留置引流管；4、术后手术部位出血，可能需要行二次手术或介入栓塞治疗；5、心脏并发症：心力衰竭、心率失常、心脏骤停危及生命等；6、深静脉血栓及肺栓塞、脑栓塞可能；7、术后切口感染，延迟愈合；8、术后腹腔感染，原发性腹膜炎，需行相应治疗措施。肿瘤直径大小和部位、肝组织切除量、术中出血量以及输血情况等是影响肝血管瘤术后并发症的危险因素，但手术风险主要与术中失血量有关。
肝血管瘤手术风险大吗	肝血管瘤作为一种较为常见的肝良性肿瘤。手术切除治疗肝血管瘤是目前认为最为确切的治疗手段，但应严格把握切除指征。肝血管瘤手术治疗具有一定风险，包括1、麻醉并发症：严重可导致休克，危及生命；2、术中出现难以控制的出血等情况，导致术中大出血，失血性休克，严重者死亡；3、术中损伤临近神经、血管、或临近器官，如胆管、肾、肾上腺等，导致胆瘘、肠瘘等情况出现，一旦形成需长期留置引流管；4、术后手术部位出血，可能需要行二次手术或介入栓塞治疗；5、心脏并发症：心力衰竭、心率失常、心脏骤停危及生命等；6、深静脉血栓及肺栓塞、脑栓塞可能；7、术后切口感染，延迟愈合；8、术后腹腔感染，原发性腹膜炎，需行相应治疗措施。肿瘤直径大小和部位、肝组织切除量、术中出血量以及输血情况等是影响肝血管瘤术后并发症的危险因素，但手术风险主要与术中失血量有关。
肝血管瘤手术风险大么？能不能彻底治愈？	肝血管瘤作为一种较为常见的肝良性肿瘤。手术切除治疗肝血管瘤是目前认为最为确切的治疗手段，但应严格把握切除指征。肝血管瘤手术治疗具有一定风险，包括1、麻醉并发症：严重可导致休克，危及生命；2、术中出现难以控制的出血等情况，导致术中大出血，失血性休克，严重者死亡；3、术中损伤临近神经、血管、或临近器官，如胆管、肾、肾上腺等，导致胆瘘、肠瘘等情况出现，一旦形成需长期留置引流管；4、术后手术部位出血，可能需要行二次手术或介入栓塞治疗；5、心脏并发症：心力衰竭、心率失常、心脏骤停危及生命等；6、深静脉血栓及肺栓塞、脑栓塞可能；7、术后切口感染，延迟愈合；8、术后腹腔感染，原发性腹膜炎，需行相应治疗措施。肿瘤直径大小和部位、肝组织切除量、术中出血量以及输血情况等是影响肝血管瘤术后并发症的危险因素，但手术风险主要与术中失血量有关。
肝血管瘤手术会不会有危险的呀	肝血管瘤作为一种较为常见的肝良性肿瘤。手术切除治疗肝血管瘤是目前认为最为确切的治疗手段，但应严格把握切除指征。肝血管瘤手术治疗具有一定风险，包括1、麻醉并发症：严重可导致休克，危及生命；2、术中出现难以控制的出血等情况，导致术中大出血，失血性休克，严重者死亡；3、术中损伤临近神经、血管、或临近器官，如胆管、肾、肾上腺等，导致胆瘘、肠瘘等情况出现，一旦形成需长期留置引流管；4、术后手术部位出血，可能需要行二次手术或介入栓塞治疗；5、心脏并发症：心力衰竭、心率失常、心脏骤停危及生命等；6、深静脉血栓及肺栓塞、脑栓塞可能；7、术后切口感染，延迟愈合；8、术后腹腔感染，原发性腹膜炎，需行相应治疗措施。肿瘤直径大小和部位、肝组织切除量、术中出血量以及输血情况等是影响肝血管瘤术后并发症的危险因素，但手术风险主要与术中失血量有关。
肝血管瘤的手术风险和什么有关系？	肝血管瘤作为一种较为常见的肝良性肿瘤。手术切除治疗肝血管瘤是目前认为最为确切的治疗手段，但应严格把握切除指征。肝血管瘤手术治疗具有一定风险，包括1、麻醉并发症：严重可导致休克，危及生命；2、术中出现难以控制的出血等情况，导致术中大出血，失血性休克，严重者死亡；3、术中损伤临近神经、血管、或临近器官，如胆管、肾、肾上腺等，导致胆瘘、肠瘘等情况出现，一旦形成需长期留置引流管；4、术后手术部位出血，可能需要行二次手术或介入栓塞治疗；5、心脏并发症：心力衰竭、心率失常、心脏骤停危及生命等；6、深静脉血栓及肺栓塞、脑栓塞可能；7、术后切口感染，延迟愈合；8、术后腹腔感染，原发性腹膜炎，需行相应治疗措施。肿瘤直径大小和部位、肝组织切除量、术中出血量以及输血情况等是影响肝血管瘤术后并发症的危险因素，但手术风险主要与术中失血量有关。
肝血管瘤手术危险吗？	肝血管瘤作为一种较为常见的肝良性肿瘤。手术切除治疗肝血管瘤是目前认为最为确切的治疗手段，但应严格把握切除指征。肝血管瘤手术治疗具有一定风险，包括1、麻醉并发症：严重可导致休克，危及生命；2、术中出现难以控制的出血等情况，导致术中大出血，失血性休克，严重者死亡；3、术中损伤临近神经、血管、或临近器官，如胆管、肾、肾上腺等，导致胆瘘、肠瘘等情况出现，一旦形成需长期留置引流管；4、术后手术部位出血，可能需要行二次手术或介入栓塞治疗；5、心脏并发症：心力衰竭、心率失常、心脏骤停危及生命等；6、深静脉血栓及肺栓塞、脑栓塞可能；7、术后切口感染，延迟愈合；8、术后腹腔感染，原发性腹膜炎，需行相应治疗措施。肿瘤直径大小和部位、肝组织切除量、术中出血量以及输血情况等是影响肝血管瘤术后并发症的危险因素，但手术风险主要与术中失血量有关。
肝血管瘤手术方法	肝血管瘤作为一种较为常见的肝良性肿瘤。手术切除治疗肝血管瘤是目前认为最为确切的治疗手段，但应严格把握切除指征。手术有开腹和腹腔镜两种，手术方式包括血管瘤剥除，不规则肝切除、肝段或半肝以及扩大的半肝切除。采用肝固有动脉持续阻断下行巨大肝血管瘤剥除术，可减少术中出血量和手术并发症发生率，安全、有效。肝移植术适用于弥漫型肝血管瘤伴有各种危险因素或巨大肝血管瘤伴严重肝功能损害的病人。因并发肝内多发动、静脉短路的病人，也可行肝移植治疗。
肝血管瘤要切除肝吗？	肝血管瘤作为一种较为常见的肝良性肿瘤。手术切除治疗肝血管瘤是目前认为最为确切的治疗手段，但应严格把握切除指征。手术有开腹和腹腔镜两种，手术方式包括血管瘤剥除，不规则肝切除、肝段或半肝以及扩大的半肝切除。采用肝固有动脉持续阻断下行巨大肝血管瘤剥除术，可减少术中出血量和手术并发症发生率，安全、有效。肝移植术适用于弥漫型肝血管瘤伴有各种危险因素或巨大肝血管瘤伴严重肝功能损害的病人。因并发肝内多发动、静脉短路的病人，也可行肝移植治疗。
肝血管瘤患者手术后注意事项有哪些？	肝血管瘤作为一种较为常见的肝良性肿瘤。手术切除治疗肝血管瘤是目前认为最为确切的治疗手段，术后应逐渐从肠外营养过度到肠内营养，一般2到3天后可予流食、半流食然后逐渐恢复至正常饮食。在饮食上要多吃水果蔬菜，千万不能喝酒。治疗以后要注意控制自己的情绪，不要吃太多的辛辣刺激的食物。增强抵抗力。要经常的出去锻炼身体，肝血管瘤患者平时少食大油荤，不能长期伏案。肝脏肝血管瘤患者不能做巨烈的体育运动和空然使猛力劳动，以防肝或腹膜破裂出血而威协生命。肝血管瘤患者最好生活起居养成规律性，早睡、早起、饮食均匀，等诸多的良好生活习惯。
小孩子检查出来有肝血管瘤应该怎么办？	肝海绵状血管瘤是最常见的肝良性肿瘤，疾病发展较慢，预后良好，最危险的并发症是血管瘤自发性破裂，且在婴幼儿较多见。因此，对新生儿肝海绵状血管瘤确诊后，建议到正规医院就诊，请请肝胆外科或普外科和儿科联合会诊，决定进一步诊治方案。
怀孕期间检查出有肝血管瘤怎么办	肝海绵状血管瘤是最常见的肝良性肿瘤，小的无症状的肝血管瘤不需治疗，但应每隔3-6个月做B超检查，动态观察肿瘤变化。直径大于10cm或有发生外伤性破裂大出血的可能或肿瘤虽小，但有明显症状或不能排除肝癌的肝血管瘤可行手术切除。本病发展较慢，预后良好，但妊娠可促使瘤体迅速增大，如此时遇意外奸娠或分娩时腹压上升因素，有增加自发性破裂的可能。建议到正规医院就诊，请肝胆外科或普外科和妇产科联合会诊，决定进一步诊治方案。
肝血管瘤手术需要几天住院？	肝血管瘤作为一种较为常见的肝良性肿瘤。手术切除治疗肝血管瘤是目前认为最为确切的治疗手段。手术分为开腹和腹腔镜手术，开腹手术术后恢复较慢，一般术后6到10天病情平稳状况下可出院观察，腹腔镜手术术后恢复较快，一般术后4到7天病情平稳状况下可出院观察。但术后若出现术后并发症或其他危险情况住院时间可能相应延长。
肝血管瘤微创手术几天出院	肝血管瘤作为一种较为常见的肝良性肿瘤。手术切除治疗肝血管瘤是目前认为最为确切的治疗手段。腹腔镜手术术后恢复较快，一般术后4到7天病情平稳状况下可出院观察。但术后若出现术后并发症或其他危险情况住院时间可能相应延长。
有多发性的子宫肌瘤合适做肝血管瘤手术吗？家人很担心	肝海绵状血管瘤是最常见的肝良性肿瘤，多认为起源于肝内的胚胎性血管错构芽，由于某种因素作用，如服用类固醇激素、避孕药以及妇女怀孕等，引起肿瘤样增生而形成。本病多见于女性，可发生于任何年龄，但以 30-50 岁多见。肿瘤小时可毫无症状，多于体检时发现。小的无症状的肝血管瘤不需治疗，但应每隔3-6个月做B超检查，动态观察肿瘤变化。直径大于10cm或有发生外伤性破裂大出血的可能或肿瘤虽小，但有明显症状或不能排除肝癌的肝血管瘤可行手术切除。建议到正规医院就诊，请肝胆外科或普外科和妇产科联合会诊，决定进一步诊治方案。
需切除子宫，但是有肝脏血管瘤，会有影响吗	肝海绵状血管瘤是最常见的肝良性肿瘤，多认为起源于肝内的胚胎性血管错构芽，由于某种因素作用，如服用类固醇激素、避孕药以及妇女怀孕等，引起肿瘤样增生而形成。本病多见于女性，可发生于任何年龄，但以 30-50 岁多见。肿瘤小时可毫无症状，多于体检时发现。小的无症状的肝血管瘤不需治疗，但应每隔3-6个月做B超检查，动态观察肿瘤变化。直径大于10cm或有发生外伤性破裂大出血的可能或肿瘤虽小，但有明显症状或不能排除肝癌的肝血管瘤可行手术切除。建议到正规医院就诊，请肝胆外科或普外科和妇产科联合会诊，决定进一步诊治方案。
肝硬化又有血管瘤请问国内最好的医院在哪里,什么医院	引起肝硬化的病因很多，可分为病毒性肝炎肝硬化、酒精性肝硬化、代谢性肝硬化、胆汁淤积性肝硬化、肝静脉回流受阻性肝硬化、自身免疫性肝硬化、毒物和药物性肝硬化、营养不良性肝硬化、隐源性肝硬化等，肝血管瘤作为一种良性肿瘤，大多无症状，且无恶变倾向，若肝血管瘤体积较大影响到肝功能，可能会引发肝硬化。到国内正规三甲医院就诊评估病情，酌情治疗。
良性肝肿瘤不做手术有什么后果？	肝脏良性肿瘤包括肝血管瘤、局灶性结节性增生和肝细胞腺瘤，肿瘤小时可毫无症状，多于体检时发现。小的无症状的肝良性肿瘤不需治疗，但应每隔3-6个月做B超检查，动态观察肿瘤变化。直径大于10cm或有发生外伤性破裂大出血的可能，或肿瘤虽小，但有明显症状或不能排除肝癌的肝良性肿瘤应手术治疗。有些病人还会出现某些凝血因子减少，合并血小板减少性紫殿，引起出血及溶血而死亡。也有因回心血量增多，心脏负担加重而导致心力衰竭。
您好乙肝患者肝上有血管瘤怎么办	肝血管瘤作为一种良性肿瘤，大多无症状，且无恶变倾向，原则上以随访观察为主。这是目前国内外普遍接受的观念。肝血管瘤严重程度取决于肝血管瘤的生长速度和大小。当血管瘤较大且合并以下危险因素时，建议酌情治疗。肝血管瘤一点都不可怕，发现之后要保持平和心态。平时要避免过度劳累和剧烈运动，不要让肝区受到外力碰撞以免肝血管瘤破裂。要定期去医院作复查。手术切除是最彻底的方法，此外还有局部消融术、肝动脉介入栓塞术等方法可以治疗肝血管瘤。口服药对较大的血管瘤效果不佳。乙型病毒性肝炎是肝癌的危险因素之一，建议到正规医院就诊后评估病情，完善CT、MRI等检查明确诊断，必要时多学科会诊联合评估，决定进一步治疗方案。
肝上长了一个血管瘤做手术能切除干净吗	肝血管瘤作为一种较为常见的肝良性肿瘤，发病机制的核心是血小板与内皮细胞的关系。手术切除治疗肝血管瘤是目前认为最为确切的治疗手段，属于根治性手术。但肝血管瘤有再次形成的可能，因此需要术后定期复查，了解病情变化。
肝血管瘤能不能完全切除掉	肝血管瘤作为一种较为常见的肝良性肿瘤，发病机制的核心是血小板与内皮细胞的关系。手术切除治疗肝血管瘤是目前认为最为确切的治疗手段，属于根治性手术。但肝血管瘤有再次形成的可能，因此需要术后定期复查，了解病情变化。
肝血管瘤切除后还可能会复发吗？	肝血管瘤作为一种较为常见的肝良性肿瘤，发病机制的核心是血小板与内皮细胞的关系。手术切除治疗肝血管瘤是目前认为最为确切的治疗手段，属于根治性手术。但肝血管瘤有再次形成的可能，因此需要术后定期复查，了解病情变化。
肝血管瘤手术治疗的效果好吗？	肝血管瘤作为一种较为常见的肝良性肿瘤，发病机制的核心是血小板与内皮细胞的关系。手术切除治疗肝血管瘤是目前认为最为确切的治疗手段，属于根治性手术。但肝血管瘤有再次形成的可能，因此需要术后定期复查，了解病情变化。
我得了肝血管瘤，会影响怀孕吗？有必要把瘤做了在怀孕吗	肝海绵状血管瘤是最常见的肝良性肿瘤，疾病发展较慢，预后良好，但妊娠可促使瘤体迅速增大，青年女性患有巨大肝血管瘤也可手术切除，这是因为肝血管瘤具有在妊娠期瘤体生长增大的特点和分娩时可能破裂大出血引发生命危险。建议到正规医院就诊，请肝胆外科或普外科和妇产科联合会诊，决定进一步诊治方案。
有肝血管瘤的人可以要小孩子吗?	肝海绵状血管瘤是最常见的肝良性肿瘤，疾病发展较慢，预后良好，但妊娠可促使瘤体迅速增大，青年女性患有巨大肝血管瘤也可手术切除，这是因为肝血管瘤具有在妊娠期瘤体生长增大的特点和分娩时可能破裂大出血引发生命危险。建议到正规医院就诊，请肝胆外科或普外科和妇产科联合会诊，决定进一步诊治方案。
我老婆肝脏上有多个血管瘤，生孩子对大人有影响吗？	肝海绵状血管瘤是最常见的肝良性肿瘤，疾病发展较慢，预后良好，但妊娠可促使瘤体迅速增大，青年女性患有巨大肝血管瘤也可手术切除，这是因为肝血管瘤具有在妊娠期瘤体生长增大的特点和分娩时可能破裂大出血引发生命危险。建议到正规医院就诊，请肝胆外科或普外科和妇产科联合会诊，决定进一步诊治方案。
有肝血管瘤不能怀孕生孩子吗？	肝海绵状血管瘤是最常见的肝良性肿瘤，疾病发展较慢，预后良好，但妊娠可促使瘤体迅速增大，青年女性患有巨大肝血管瘤也可手术切除，这是因为肝血管瘤具有在妊娠期瘤体生长增大的特点和分娩时可能破裂大出血引发生命危险。建议到正规医院就诊，请肝胆外科或普外科和妇产科联合会诊，决定进一步诊治方案。
肝血管瘤可以要孩子吗？	肝海绵状血管瘤是最常见的肝良性肿瘤，疾病发展较慢，预后良好，但妊娠可促使瘤体迅速增大，青年女性患有巨大肝血管瘤也可手术切除，这是因为肝血管瘤具有在妊娠期瘤体生长增大的特点和分娩时可能破裂大出血引发生命危险。建议到正规医院就诊，请肝胆外科或普外科和妇产科联合会诊，决定进一步诊治方案。
我得了良性肝脏血管瘤，是否能要宝宝？	肝海绵状血管瘤是最常见的肝良性肿瘤，疾病发展较慢，预后良好，但妊娠可促使瘤体迅速增大，青年女性患有巨大肝血管瘤也可手术切除，这是因为肝血管瘤具有在妊娠期瘤体生长增大的特点和分娩时可能破裂大出血引发生命危险。建议到正规医院就诊，请肝胆外科或普外科和妇产科联合会诊，决定进一步诊治方案。
得了肝血管瘤还能怀孕吗？	肝海绵状血管瘤是最常见的肝良性肿瘤，疾病发展较慢，预后良好，但妊娠可促使瘤体迅速增大，青年女性患有巨大肝血管瘤也可手术切除，这是因为肝血管瘤具有在妊娠期瘤体生长增大的特点和分娩时可能破裂大出血引发生命危险。建议到正规医院就诊，请肝胆外科或普外科和妇产科联合会诊，决定进一步诊治方案。
得了肝血管瘤还适合怀孕吗？	肝海绵状血管瘤是最常见的肝良性肿瘤，疾病发展较慢，预后良好，但妊娠可促使瘤体迅速增大，青年女性患有巨大肝血管瘤也可手术切除，这是因为肝血管瘤具有在妊娠期瘤体生长增大的特点和分娩时可能破裂大出血引发生命危险。建议到正规医院就诊，请肝胆外科或普外科和妇产科联合会诊，决定进一步诊治方案。
检查出有肝血管瘤会影响怀孕吗	肝海绵状血管瘤是最常见的肝良性肿瘤，疾病发展较慢，预后良好，但妊娠可促使瘤体迅速增大，青年女性患有巨大肝血管瘤也可手术切除，这是因为肝血管瘤具有在妊娠期瘤体生长增大的特点和分娩时可能破裂大出血引发生命危险。建议到正规医院就诊，请肝胆外科或普外科和妇产科联合会诊，决定进一步诊治方案。
肝血管瘤能不能吸烟？	肝血管瘤作为一种良性肿瘤，大多无症状，且无恶变倾向，原则上以随访观察为主。这是目前国内外普遍接受的观念。当血管瘤较大且合并危险因素时，建议酌情治疗。肝血管瘤患者平时少食大油荤，不能长期伏案。肝脏肝血管瘤患者不能做巨烈的体育运动和空然使猛力劳动，以防肝破裂出血而威协生命。肝血管瘤患者最好生活起居养成规律性，戒烟、戒酒、早睡、早起、饮食均匀等诸多的良好生活习惯。
肝脏血管瘤能喝酒吗	肝血管瘤作为一种良性肿瘤，大多无症状，且无恶变倾向，原则上以随访观察为主。这是目前国内外普遍接受的观念。当血管瘤较大且合并危险因素时，建议酌情治疗。肝血管瘤患者平时少食大油荤，不能长期伏案。肝脏肝血管瘤患者不能做巨烈的体育运动和空然使猛力劳动，以防肝破裂出血而威协生命。肝血管瘤患者最好生活起居养成规律性，戒烟、戒酒、早睡、早起、饮食均匀等诸多的良好生活习惯。
有肝血管瘤就不能吸烟喝酒了吗？	肝血管瘤作为一种良性肿瘤，大多无症状，且无恶变倾向，原则上以随访观察为主。这是目前国内外普遍接受的观念。当血管瘤较大且合并危险因素时，建议酌情治疗。肝血管瘤患者平时少食大油荤，不能长期伏案。肝脏肝血管瘤患者不能做巨烈的体育运动和空然使猛力劳动，以防肝破裂出血而威协生命。肝血管瘤患者最好生活起居养成规律性，戒烟、戒酒、早睡、早起、饮食均匀等诸多的良好生活习惯。
肝脏上长了一个血管瘤还能喝酒吗	肝血管瘤作为一种良性肿瘤，大多无症状，且无恶变倾向，原则上以随访观察为主。这是目前国内外普遍接受的观念。当血管瘤较大且合并危险因素时，建议酌情治疗。肝血管瘤患者平时少食大油荤，不能长期伏案。肝脏肝血管瘤患者不能做巨烈的体育运动和空然使猛力劳动，以防肝破裂出血而威协生命。肝血管瘤患者最好生活起居养成规律性，戒烟、戒酒、早睡、早起、饮食均匀等诸多的良好生活习惯。
肝血管瘤能吸烟喝酒吗？	肝血管瘤作为一种良性肿瘤，大多无症状，且无恶变倾向，原则上以随访观察为主。这是目前国内外普遍接受的观念。当血管瘤较大且合并危险因素时，建议酌情治疗。肝血管瘤患者平时少食大油荤，不能长期伏案。肝脏肝血管瘤患者正常活动不受影响，但不能做巨烈的体育运动和空然使猛力劳动，以防肝破裂出血而威协生命。肝血管瘤患者最好生活起居养成规律性，戒烟、戒酒、早睡、早起、饮食均匀等诸多的良好生活习惯。
肝血管瘤能做什么运动？	肝血管瘤作为一种良性肿瘤，大多无症状，且无恶变倾向，原则上以随访观察为主。这是目前国内外普遍接受的观念。当血管瘤较大且合并危险因素时，建议酌情治疗。肝血管瘤患者平时少食大油荤，不能长期伏案。肝脏肝血管瘤患者正常活动不受影响，但不能做巨烈的体育运动和空然使猛力劳动，以防肝破裂出血而威协生命。肝血管瘤患者最好生活起居养成规律性，戒烟、戒酒、早睡、早起、饮食均匀等诸多的良好生活习惯。
肝血管瘤病人可以跑步吗？	肝血管瘤作为一种良性肿瘤，大多无症状，且无恶变倾向，原则上以随访观察为主。这是目前国内外普遍接受的观念。当血管瘤较大且合并危险因素时，建议酌情治疗。肝血管瘤患者平时少食大油荤，不能长期伏案。肝脏肝血管瘤患者正常活动不受影响，但不能做巨烈的体育运动和空然使猛力劳动，以防肝破裂出血而威协生命。肝血管瘤患者最好生活起居养成规律性，戒烟、戒酒、早睡、早起、饮食均匀等诸多的良好生活习惯。
肝血管瘤能做什么运动好呢？	肝血管瘤作为一种良性肿瘤，大多无症状，且无恶变倾向，原则上以随访观察为主。这是目前国内外普遍接受的观念。当血管瘤较大且合并危险因素时，建议酌情治疗。肝血管瘤患者平时少食大油荤，不能长期伏案。肝脏肝血管瘤患者正常活动不受影响，但不能做巨烈的体育运动和空然使猛力劳动，以防肝破裂出血而威协生命。肝血管瘤患者最好生活起居养成规律性，戒烟、戒酒、早睡、早起、饮食均匀等诸多的良好生活习惯。
得了肝血管瘤还可以长期做体力活嘛？	肝血管瘤作为一种良性肿瘤，大多无症状，且无恶变倾向，原则上以随访观察为主。这是目前国内外普遍接受的观念。当血管瘤较大且合并危险因素时，建议酌情治疗。肝血管瘤患者平时少食大油荤，不能长期伏案。肝脏肝血管瘤患者正常活动不受影响，但不能做巨烈的体育运动和空然使猛力劳动，以防肝破裂出血而威协生命。肝血管瘤患者最好生活起居养成规律性，戒烟、戒酒、早睡、早起、饮食均匀等诸多的良好生活习惯。
宝宝肝脏血管瘤需要注意什么	肝海绵状血管瘤是最常见的肝良性肿瘤，疾病发展较慢，预后良好，最危险的并发症是血管瘤自发性破裂，且在婴幼儿较多见。因此，对新生儿肝海绵状血管瘤确诊后，建议到正规医院就诊，请请肝胆外科或普外科和儿科联合会诊，决定进一步诊治方案。
肝血管瘤手术后能不能干体力活	肝血管瘤作为一种较为常见的肝良性肿瘤。手术切除治疗肝血管瘤是目前认为最为确切的治疗手段。手术分为开腹和腹腔镜手术，开腹手术术后恢复较慢，一般术后6到10天病情平稳状况下可出院观察，腹腔镜手术术后恢复较快，一般术后4到7天病情平稳状况下可出院观察。但术后若出现术后并发症或其他危险情况住院时间可能相应延长。出院后继续营养等支持治疗，一般术后1月即可恢复正常生活。肝脏肝血管瘤患者正常活动不受影响，但不能做巨烈的体育运动和空然使猛力劳动，以防肝破裂出血而威协生命。
肝血管瘤手术后多久可以干体力话？	肝血管瘤作为一种较为常见的肝良性肿瘤。手术切除治疗肝血管瘤是目前认为最为确切的治疗手段。手术分为开腹和腹腔镜手术，开腹手术术后恢复较慢，一般术后6到10天病情平稳状况下可出院观察，腹腔镜手术术后恢复较快，一般术后4到7天病情平稳状况下可出院观察。但术后若出现术后并发症或其他危险情况住院时间可能相应延长。出院后继续营养等支持治疗，一般术后2月即可恢复正常生活。肝脏肝血管瘤患者正常活动不受影响，但不能做巨烈的体育运动和空然使猛力劳动，以防肝破裂出血而威协生命。
肝血管瘤手术后多久才能上班？	肝血管瘤作为一种较为常见的肝良性肿瘤。手术切除治疗肝血管瘤是目前认为最为确切的治疗手段。手术分为开腹和腹腔镜手术，开腹手术术后恢复较慢，一般术后6到10天病情平稳状况下可出院观察，腹腔镜手术术后恢复较快，一般术后4到7天病情平稳状况下可出院观察。但术后若出现术后并发症或其他危险情况住院时间可能相应延长。出院后继续营养等支持治疗，一般术后2月即可恢复正常生活。肝脏肝血管瘤患者正常活动不受影响，但不能做巨烈的体育运动和空然使猛力劳动，以防肝破裂出血而威协生命。
肝腺瘤手术后多久恢复？	肝血管瘤作为一种较为常见的肝良性肿瘤。手术切除治疗肝血管瘤是目前认为最为确切的治疗手段。手术分为开腹和腹腔镜手术，开腹手术术后恢复较慢，一般术后6到10天病情平稳状况下可出院观察，腹腔镜手术术后恢复较快，一般术后4到7天病情平稳状况下可出院观察。但术后若出现术后并发症或其他危险情况住院时间可能相应延长。出院后继续营养等支持治疗，一般术后2月即可恢复正常生活。肝脏肝血管瘤患者正常活动不受影响，但不能做巨烈的体育运动和空然使猛力劳动，以防肝破裂出血而威协生命。
肝血管瘤术后多久可以干重活	肝血管瘤作为一种较为常见的肝良性肿瘤。手术切除治疗肝血管瘤是目前认为最为确切的治疗手段。手术分为开腹和腹腔镜手术，开腹手术术后恢复较慢，一般术后6到10天病情平稳状况下可出院观察，腹腔镜手术术后恢复较快，一般术后4到7天病情平稳状况下可出院观察。但术后若出现术后并发症或其他危险情况住院时间可能相应延长。出院后继续营养等支持治疗，一般术后2月即可恢复正常生活。肝脏肝血管瘤患者正常活动不受影响，但不能做巨烈的体育运动和空然使猛力劳动，以防肝破裂出血而威协生命。
肝血管瘤手术后要多久才能恢复正常？	肝血管瘤作为一种较为常见的肝良性肿瘤。手术切除治疗肝血管瘤是目前认为最为确切的治疗手段。手术分为开腹和腹腔镜手术，开腹手术术后恢复较慢，一般术后6到10天病情平稳状况下可出院观察，腹腔镜手术术后恢复较快，一般术后4到7天病情平稳状况下可出院观察。但术后若出现术后并发症或其他危险情况住院时间可能相应延长。出院后继续营养等支持治疗，一般术后2月即可恢复正常生活。肝脏肝血管瘤患者正常活动不受影响，但不能做巨烈的体育运动和空然使猛力劳动，以防肝破裂出血而威协生命。
脑供血不足肝血管瘤1.3左右能刮痧拔罐吗	肝血管瘤作为一种良性肿瘤，大多无症状，且无恶变倾向，原则上以随访观察为主。这是目前国内外普遍接受的观念。当血管瘤较大且合并危险因素时，建议酌情治疗。目前刮痧拔罐疗法没有明确的机理及疗效，建议到正规医院中医科就诊，遵医嘱治疗。
做完肝血管瘤微创手术肚子疼什么时候才会恢复	肝血管瘤作为一种较为常见的肝良性肿瘤。手术切除治疗肝血管瘤是目前认为最为确切的治疗手段。手术分为开腹和腹腔镜手术，开腹手术术后恢复较慢，一般术后6到10天病情平稳状况下可出院观察，微创手术术后恢复较快，术后肚子疼原因可能是切口处疼痛、术后手术部位疼痛等，建议到正规医院就诊，明确腹痛病因，及时对症治疗。
肝血管瘤能运动吗？	肝血管瘤作为一种较为常见的肝良性肿瘤。手术切除治疗肝血管瘤是目前认为最为确切的治疗手段。手术分为开腹和腹腔镜手术，开腹手术术后恢复较慢，一般术后6到10天病情平稳状况下可出院观察，腹腔镜手术术后恢复较快，一般术后4到7天病情平稳状况下可出院观察。但术后若出现术后并发症或其他危险情况住院时间可能相应延长。出院后继续营养等支持治疗，一般术后2月即可恢复正常生活。肝脏肝血管瘤患者正常活动不受影响，但不能做巨烈的体育运动和空然使猛力劳动，以防肝破裂出血而威协生命。
肝血管瘤能打篮球，踢足球吗？	肝血管瘤作为一种较为常见的肝良性肿瘤。手术切除治疗肝血管瘤是目前认为最为确切的治疗手段。手术分为开腹和腹腔镜手术，开腹手术术后恢复较慢，一般术后6到10天病情平稳状况下可出院观察，腹腔镜手术术后恢复较快，一般术后4到7天病情平稳状况下可出院观察。但术后若出现术后并发症或其他危险情况住院时间可能相应延长。出院后继续营养等支持治疗，一般术后2月即可恢复正常生活。肝脏肝血管瘤患者正常活动不受影响，但不能做巨烈的体育运动和空然使猛力劳动，以防肝破裂出血而威协生命。
肝血管瘤的病人可以跑步吗？	肝血管瘤作为一种较为常见的肝良性肿瘤。手术切除治疗肝血管瘤是目前认为最为确切的治疗手段。手术分为开腹和腹腔镜手术，开腹手术术后恢复较慢，一般术后6到10天病情平稳状况下可出院观察，腹腔镜手术术后恢复较快，一般术后4到7天病情平稳状况下可出院观察。但术后若出现术后并发症或其他危险情况住院时间可能相应延长。出院后继续营养等支持治疗，一般术后2月即可恢复正常生活。肝脏肝血管瘤患者正常活动不受影响，但不能做巨烈的体育运动和空然使猛力劳动，以防肝破裂出血而威协生命。
肝内血管瘤能运动么？	肝血管瘤作为一种较为常见的肝良性肿瘤。手术切除治疗肝血管瘤是目前认为最为确切的治疗手段。手术分为开腹和腹腔镜手术，开腹手术术后恢复较慢，一般术后6到10天病情平稳状况下可出院观察，腹腔镜手术术后恢复较快，一般术后4到7天病情平稳状况下可出院观察。但术后若出现术后并发症或其他危险情况住院时间可能相应延长。出院后继续营养等支持治疗，一般术后2月即可恢复正常生活。肝脏肝血管瘤患者正常活动不受影响，但不能做巨烈的体育运动和空然使猛力劳动，以防肝破裂出血而威协生命。
肝血管瘤微创手术 术后多久可以运动	肝血管瘤作为一种较为常见的肝良性肿瘤。手术切除治疗肝血管瘤是目前认为最为确切的治疗手段。手术分为开腹和腹腔镜手术，开腹手术术后恢复较慢，一般术后6到10天病情平稳状况下可出院观察，腹腔镜手术术后恢复较快，一般术后4到7天病情平稳状况下可出院观察。但术后若出现术后并发症或其他危险情况住院时间可能相应延长。出院后继续营养等支持治疗，一般术后2月即可恢复正常生活。肝脏肝血管瘤患者正常活动不受影响，但不能做巨烈的体育运动和空然使猛力劳动，以防肝破裂出血而威协生命。
肝脏血管瘤会影响入职吗？	可以通过，肝血管瘤作为一种良性肿瘤，大多无症状，且无恶变倾向，根据《录用体检通用标准（试行）》第七条规定：各种急慢性肝炎及肝硬化，不合格。第八条：恶性肿瘤，不合格。肝血管瘤是一种较为常见的肝脏良性肿瘤，既不属于急慢性肝炎也不属于恶性肿瘤，符合体检标准。
怎样预防肝血管瘤长大？	肝血管瘤作为一种较为常见的肝良性肿瘤，发病机制的核心是血小板与内皮细胞的关系。肝血管瘤大多无症状，且无恶变倾向，原则上以随访观察为主。这是目前国内外普遍接受的观念。当血管瘤较大且合并危险因素时，建议酌情治疗。肝血管瘤生长没有办法预防，需要定期复查随访，瘤体小于10cm一般不需要手术，定期门诊随访观察；大于10cm的肝血管瘤一般需手术切除。此外，伴发症状或者出现严重并发症的肝血管瘤可以手术，如腹痛、临近器官受压、血小板异常消耗或肝功能受其影响。肝血管瘤生长速度明显的血管瘤也推荐手术治疗。青年女性患有巨大肝血管瘤也可手术切除，这是因为肝血管瘤具有在妊娠期瘤体生长增大的特点和分娩时可能破裂大出血引发生命危险。对从事剧烈活动的职业或爱好者，如足球、篮球、拳击等，可能招致肝外伤的巨大肝血管瘤患者，也可以考虑手术切除。
肝血管瘤患者平时要怎么保养呢？	肝血管瘤作为一种良性肿瘤，大多无症状，且无恶变倾向，原则上以随访观察为主。这是目前国内外普遍接受的观念。当血管瘤较大且合并危险因素时，建议酌情治疗。肝血管瘤患者平时少食大油荤，不能长期伏案。肝脏肝血管瘤患者正常活动不受影响，但不能做巨烈的体育运动和空然使猛力劳动，以防肝破裂出血而威协生命。肝血管瘤患者最好生活起居养成规律性，戒烟、戒酒、早睡、早起、饮食均匀等诸多的良好生活习惯。
肝血管瘤有什么要忌口的吗?	肝血管瘤作为一种良性肿瘤，大多无症状，且无恶变倾向，原则上以随访观察为主。这是目前国内外普遍接受的观念。当血管瘤较大且合并危险因素时，建议酌情治疗。肝血管瘤患者平时少食大油荤，不能长期伏案。肝脏肝血管瘤患者正常活动不受影响，但不能做巨烈的体育运动和空然使猛力劳动，以防肝破裂出血而威协生命。肝血管瘤患者最好生活起居养成规律性，戒烟、戒酒、早睡、早起、饮食均匀等诸多的良好生活习惯。
检查出来肝血管瘤能过性生活吗？	肝血管瘤作为一种良性肿瘤，大多无症状，且无恶变倾向，原则上以随访观察为主。这是目前国内外普遍接受的观念。当血管瘤较大且合并危险因素时，建议酌情治疗。肝脏肝血管瘤患者正常活动不受影响，但不能做巨烈的体育运动和空然使猛力劳动，以防肝破裂出血而威协生命。正常性生活没有明显禁忌症。
肝血管瘤能过性生活吗	肝血管瘤作为一种良性肿瘤，大多无症状，且无恶变倾向，原则上以随访观察为主。这是目前国内外普遍接受的观念。当血管瘤较大且合并危险因素时，建议酌情治疗。肝脏肝血管瘤患者正常活动不受影响，但不能做巨烈的体育运动和空然使猛力劳动，以防肝破裂出血而威协生命。正常性生活没有明显禁忌症。
肝血管瘤生活中应注意什么？	肝血管瘤作为一种良性肿瘤，大多无症状，且无恶变倾向，原则上以随访观察为主。这是目前国内外普遍接受的观念。当血管瘤较大且合并危险因素时，建议酌情治疗。肝血管瘤患者平时少食大油荤，不能长期伏案。肝脏肝血管瘤患者正常活动不受影响，但不能做巨烈的体育运动和空然使猛力劳动，以防肝破裂出血而威协生命。肝血管瘤患者最好生活起居养成规律性，戒烟、戒酒、早睡、早起、饮食均匀等诸多的良好生活习惯。
肝血管瘤对事业单位体检有影响吗？	可以通过，肝血管瘤作为一种良性肿瘤，大多无症状，且无恶变倾向，根据《录用体检通用标准（试行）》第七条规定：各种急慢性肝炎及肝硬化，不合格。第八条：恶性肿瘤，不合格。肝血管瘤是一种较为常见的肝脏良性肿瘤，既不属于急慢性肝炎也不属于恶性肿瘤，符合体检标准。
肝部血管瘤影响入职吗？	可以通过，肝血管瘤作为一种良性肿瘤，大多无症状，且无恶变倾向，根据《录用体检通用标准（试行）》第七条规定：各种急慢性肝炎及肝硬化，不合格。第八条：恶性肿瘤，不合格。肝血管瘤是一种较为常见的肝脏良性肿瘤，既不属于急慢性肝炎也不属于恶性肿瘤，符合体检标准。
肝血管瘤平时要注意什么	肝血管瘤作为一种良性肿瘤，大多无症状，且无恶变倾向，原则上以随访观察为主。这是目前国内外普遍接受的观念。当血管瘤较大且合并危险因素时，建议酌情治疗。肝血管瘤患者平时少食大油荤，不能长期伏案。肝脏肝血管瘤患者正常活动不受影响，但不能做巨烈的体育运动和空然使猛力劳动，以防肝破裂出血而威协生命。肝血管瘤患者最好生活起居养成规律性，戒烟、戒酒、早睡、早起、饮食均匀等诸多的良好生活习惯。
肝血管瘤病人能不能吃感冒药	肝血管瘤作为一种良性肿瘤，大多无症状，且无恶变倾向，原则上以随访观察为主。肝血管瘤患者目前没有证据证明不能服用感冒药，但需遵医嘱治疗。
肝血管瘤还能买保险吗？	肝血管瘤作为一种较为常见的肝良性肿瘤，发病机制的核心是血小板与内皮细胞的关系。肝血管瘤大多无症状，且无恶变倾向。保险条例各色各异，若保险中明确提到肝脏有占位性病变者不可参保，就不能买保险。
肝血管瘤做了介入手术半年了。经常背疼，怎么办	肝动脉介入栓塞术具有创伤小、花费少、术后恢复快等优点，近期疗效比较确切，但远期复发率相对较高。背痛病因可能是肾脏疾病，心脏疾病、消化道疾病放射痛，建议到正规医院就诊，完善CT、MRI等相关检查，查明患者疼痛原因，评估患者病情，必要时多学科会诊，决定进一步诊治方案。
哺乳期刺激肝血管瘤吗	肝海绵状血管瘤是最常见的肝良性肿瘤，多认为起源于肝内的胚胎性血管错构芽，由于某种因素作用，如服用类固醇激素、避孕药以及妇女怀孕等，引起肿瘤样增生而形成。哺乳期女性需定期做B超检查，动态观察肿瘤变化，直径大于10cm或有发生外伤性破裂大出血的可能或肿瘤虽小，但有明显症状或不能排除肝癌的肝血管瘤可行手术切除。
有肝血管瘤还能哺乳吗？	肝海绵状血管瘤是最常见的肝良性肿瘤，多认为起源于肝内的胚胎性血管错构芽，由于某种因素作用，如服用类固醇激素、避孕药以及妇女怀孕等，引起肿瘤样增生而形成。肝血管瘤不通过哺乳传播，可放心哺乳。患者需定期做B超检查，动态观察肿瘤变化，直径大于10cm或有发生外伤性破裂大出血的可能或肿瘤虽小，但有明显症状或不能排除肝癌的肝血管瘤可行手术切除。
我肝上有血管瘤能坐仰卧起坐吗	肝血管瘤作为一种较为常见的肝良性肿瘤。手术切除治疗肝血管瘤是目前认为最为确切的治疗手段。手术分为开腹和腹腔镜手术，开腹手术术后恢复较慢，一般术后6到10天病情平稳状况下可出院观察，腹腔镜手术术后恢复较快，一般术后4到7天病情平稳状况下可出院观察。但术后若出现术后并发症或其他危险情况住院时间可能相应延长。出院后继续营养等支持治疗，一般术后2月即可恢复正常生活。肝脏肝血管瘤患者正常活动不受影响，但不能做巨烈的体育运动和空然使猛力劳动，以防肝破裂出血而威协生命。
肝脏有血管瘤能服用避孕药吗	肝海绵状血管瘤是最常见的肝良性肿瘤，多认为起源于肝内的胚胎性血管错构芽，由于某种因素作用，如服用类固醇激素、避孕药以及妇女怀孕等，引起肿瘤样增生而形成。因此应避免过多使用避孕药，同时定期做B超检查，动态观察肿瘤变化，直径大于10cm或有发生外伤性破裂大出血的可能或肿瘤虽小，但有明显症状或不能排除肝癌的肝血管瘤可行手术切除。
肝血管瘤患者献血后会出现危险吗	肝血管瘤作为一种良性肿瘤，大多无症状，且无恶变倾向，原则上以随访观察为主。这是目前国内外普遍接受的观念。当血管瘤较大且合并危险因素时，建议酌情治疗。肝血管瘤患者献血后没有明显禁忌症，但如果献血后出现腹痛等症状及时到正规医院就诊治疗。
肝血管瘤用中草药能治好吗	肝脏血管瘤是最常见的肝良性肿瘤，多认为起源于肝内的胚胎性血管错构芽，由于某种因素作用，如服用类固醇激素、避孕药以及妇女怀孕等，引起肿瘤样增生而形成。肝血管瘤作为一种良性肿瘤，大多无症状，且无恶变倾向，原则上以随访观察为主。这是目前国内外普遍接受的观念。当血管瘤较大且合并危险因素时，建议酌情治疗。目前没有有效的中药治疗方法，建议到正规医院中医科就诊，遵医嘱中医治疗，并且定期复查，动态观察肿瘤变化。直径大于10cm或有发生外伤性破裂大出血的可能或肿瘤虽小，但有明显症状或不能排除肝癌的肝血管瘤可行手术切除。
肝血管瘤中医能治吗	肝脏血管瘤是最常见的肝良性肿瘤，多认为起源于肝内的胚胎性血管错构芽，由于某种因素作用，如服用类固醇激素、避孕药以及妇女怀孕等，引起肿瘤样增生而形成。肝血管瘤作为一种良性肿瘤，大多无症状，且无恶变倾向，原则上以随访观察为主。这是目前国内外普遍接受的观念。当血管瘤较大且合并危险因素时，建议酌情治疗。目前没有有效的中药治疗方法，建议到正规医院中医科就诊，遵医嘱中医治疗，并且定期复查，动态观察肿瘤变化。直径大于10cm或有发生外伤性破裂大出血的可能或肿瘤虽小，但有明显症状或不能排除肝癌的肝血管瘤可行手术切除。
有谁知道肝血管瘤的中药治疗方法？	肝脏血管瘤是最常见的肝良性肿瘤，多认为起源于肝内的胚胎性血管错构芽，由于某种因素作用，如服用类固醇激素、避孕药以及妇女怀孕等，引起肿瘤样增生而形成。肝血管瘤作为一种良性肿瘤，大多无症状，且无恶变倾向，原则上以随访观察为主。这是目前国内外普遍接受的观念。当血管瘤较大且合并危险因素时，建议酌情治疗。目前没有有效的中药治疗方法，建议到正规医院中医科就诊，遵医嘱中医治疗，并且定期复查，动态观察肿瘤变化。直径大于10cm或有发生外伤性破裂大出血的可能或肿瘤虽小，但有明显症状或不能排除肝癌的肝血管瘤可行手术切除。
您好我有肝脏血管瘤。能服用三七吗	肝脏血管瘤是最常见的肝良性肿瘤，多认为起源于肝内的胚胎性血管错构芽，由于某种因素作用，如服用类固醇激素、避孕药以及妇女怀孕等，引起肿瘤样增生而形成。肝血管瘤作为一种良性肿瘤，大多无症状，且无恶变倾向，原则上以随访观察为主。这是目前国内外普遍接受的观念。当血管瘤较大且合并危险因素时，建议酌情治疗。目前没有有效的中药治疗方法，建议到正规医院中医科就诊，遵医嘱中医治疗，并且定期复查，动态观察肿瘤变化。直径大于10cm或有发生外伤性破裂大出血的可能或肿瘤虽小，但有明显症状或不能排除肝癌的肝血管瘤可行手术切除。
有谁知道肝血管瘤的中药治疗方法？	肝脏血管瘤是最常见的肝良性肿瘤，多认为起源于肝内的胚胎性血管错构芽，由于某种因素作用，如服用类固醇激素、避孕药以及妇女怀孕等，引起肿瘤样增生而形成。肝血管瘤作为一种良性肿瘤，大多无症状，且无恶变倾向，原则上以随访观察为主。这是目前国内外普遍接受的观念。当血管瘤较大且合并危险因素时，建议酌情治疗。目前没有有效的中药治疗方法，建议到正规医院中医科就诊，遵医嘱中医治疗，并且定期复查，动态观察肿瘤变化。直径大于10cm或有发生外伤性破裂大出血的可能或肿瘤虽小，但有明显症状或不能排除肝癌的肝血管瘤可行手术切除。
1.4x1.5肝血管瘤吃中药能消除吗？	肝脏血管瘤是最常见的肝良性肿瘤，多认为起源于肝内的胚胎性血管错构芽，由于某种因素作用，如服用类固醇激素、避孕药以及妇女怀孕等，引起肿瘤样增生而形成。肝血管瘤作为一种良性肿瘤，大多无症状，且无恶变倾向，原则上以随访观察为主。这是目前国内外普遍接受的观念。当血管瘤较大且合并危险因素时，建议酌情治疗。目前没有有效的中药治疗方法，建议到正规医院中医科就诊，遵医嘱中医治疗，并且定期复查，动态观察肿瘤变化。直径大于10cm或有发生外伤性破裂大出血的可能或肿瘤虽小，但有明显症状或不能排除肝癌的肝血管瘤可行手术切除。
胆囊息肉和肝血管瘤吃中药能消除吗	肝脏血管瘤是最常见的肝良性肿瘤，多认为起源于肝内的胚胎性血管错构芽，由于某种因素作用，如服用类固醇激素、避孕药以及妇女怀孕等，引起肿瘤样增生而形成。肝血管瘤作为一种良性肿瘤，大多无症状，且无恶变倾向，原则上以随访观察为主。这是目前国内外普遍接受的观念。当血管瘤较大且合并危险因素时，建议酌情治疗。目前没有有效的中药治疗方法，建议到正规医院中医科就诊，遵医嘱中医治疗，并且定期复查，动态观察肿瘤变化。直径大于10cm或有发生外伤性破裂大出血的可能或肿瘤虽小，但有明显症状或不能排除肝癌的肝血管瘤可行手术切除。
肝脏血管瘤能中医治疗吗？	肝脏血管瘤是最常见的肝良性肿瘤，多认为起源于肝内的胚胎性血管错构芽，由于某种因素作用，如服用类固醇激素、避孕药以及妇女怀孕等，引起肿瘤样增生而形成。肝血管瘤作为一种良性肿瘤，大多无症状，且无恶变倾向，原则上以随访观察为主。这是目前国内外普遍接受的观念。当血管瘤较大且合并危险因素时，建议酌情治疗。目前没有有效的中药治疗方法，建议到正规医院中医科就诊，遵医嘱中医治疗，并且定期复查，动态观察肿瘤变化。直径大于10cm或有发生外伤性破裂大出血的可能或肿瘤虽小，但有明显症状或不能排除肝癌的肝血管瘤可行手术切除。
肝部血管瘤，可以艾灸吗？灸哪些穴位？如何灸	肝脏血管瘤是最常见的肝良性肿瘤，多认为起源于肝内的胚胎性血管错构芽，由于某种因素作用，如服用类固醇激素、避孕药以及妇女怀孕等，引起肿瘤样增生而形成。肝血管瘤作为一种良性肿瘤，大多无症状，且无恶变倾向，原则上以随访观察为主。这是目前国内外普遍接受的观念。当血管瘤较大且合并危险因素时，建议酌情治疗。目前没有有效的中药治疗方法，建议到正规医院中医科就诊，遵医嘱中医治疗，并且定期复查，动态观察肿瘤变化。直径大于10cm或有发生外伤性破裂大出血的可能或肿瘤虽小，但有明显症状或不能排除肝癌的肝血管瘤可行手术切除。
田七治肝血管瘤可以吗？	肝脏血管瘤是最常见的肝良性肿瘤，多认为起源于肝内的胚胎性血管错构芽，由于某种因素作用，如服用类固醇激素、避孕药以及妇女怀孕等，引起肿瘤样增生而形成。肝血管瘤作为一种良性肿瘤，大多无症状，且无恶变倾向，原则上以随访观察为主。这是目前国内外普遍接受的观念。当血管瘤较大且合并危险因素时，建议酌情治疗。目前没有有效的中药治疗方法，建议到正规医院中医科就诊，遵医嘱中医治疗，并且定期复查，动态观察肿瘤变化。直径大于10cm或有发生外伤性破裂大出血的可能或肿瘤虽小，但有明显症状或不能排除肝癌的肝血管瘤可行手术切除。
中医肝血管瘤如何治疗？	肝脏血管瘤是最常见的肝良性肿瘤，多认为起源于肝内的胚胎性血管错构芽，由于某种因素作用，如服用类固醇激素、避孕药以及妇女怀孕等，引起肿瘤样增生而形成。肝血管瘤作为一种良性肿瘤，大多无症状，且无恶变倾向，原则上以随访观察为主。这是目前国内外普遍接受的观念。当血管瘤较大且合并危险因素时，建议酌情治疗。目前没有有效的中药治疗方法，建议到正规医院中医科就诊，遵医嘱中医治疗，并且定期复查，动态观察肿瘤变化。直径大于10cm或有发生外伤性破裂大出血的可能或肿瘤虽小，但有明显症状或不能排除肝癌的肝血管瘤可行手术切除。
肝脏血管瘤可以喝中药调理一下吗？	肝脏血管瘤是最常见的肝良性肿瘤，多认为起源于肝内的胚胎性血管错构芽，由于某种因素作用，如服用类固醇激素、避孕药以及妇女怀孕等，引起肿瘤样增生而形成。肝血管瘤作为一种良性肿瘤，大多无症状，且无恶变倾向，原则上以随访观察为主。这是目前国内外普遍接受的观念。当血管瘤较大且合并危险因素时，建议酌情治疗。目前没有有效的中药治疗方法，建议到正规医院中医科就诊，遵医嘱中医治疗，并且定期复查，动态观察肿瘤变化。直径大于10cm或有发生外伤性破裂大出血的可能或肿瘤虽小，但有明显症状或不能排除肝癌的肝血管瘤可行手术切除。
肝脏的血管瘤吃中药能好吗？	肝脏血管瘤是最常见的肝良性肿瘤，多认为起源于肝内的胚胎性血管错构芽，由于某种因素作用，如服用类固醇激素、避孕药以及妇女怀孕等，引起肿瘤样增生而形成。肝血管瘤作为一种良性肿瘤，大多无症状，且无恶变倾向，原则上以随访观察为主。这是目前国内外普遍接受的观念。当血管瘤较大且合并危险因素时，建议酌情治疗。目前没有有效的中药治疗方法，建议到正规医院中医科就诊，遵医嘱中医治疗，并且定期复查，动态观察肿瘤变化。直径大于10cm或有发生外伤性破裂大出血的可能或肿瘤虽小，但有明显症状或不能排除肝癌的肝血管瘤可行手术切除。
肝脏血管瘤中医治疗	肝脏血管瘤是最常见的肝良性肿瘤，多认为起源于肝内的胚胎性血管错构芽，由于某种因素作用，如服用类固醇激素、避孕药以及妇女怀孕等，引起肿瘤样增生而形成。肝血管瘤作为一种良性肿瘤，大多无症状，且无恶变倾向，原则上以随访观察为主。这是目前国内外普遍接受的观念。当血管瘤较大且合并危险因素时，建议酌情治疗。目前没有有效的中药治疗方法，建议到正规医院中医科就诊，遵医嘱中医治疗，并且定期复查，动态观察肿瘤变化。直径大于10cm或有发生外伤性破裂大出血的可能或肿瘤虽小，但有明显症状或不能排除肝癌的肝血管瘤可行手术切除。
肝血管瘤吃什么中成药	肝脏血管瘤是最常见的肝良性肿瘤，多认为起源于肝内的胚胎性血管错构芽，由于某种因素作用，如服用类固醇激素、避孕药以及妇女怀孕等，引起肿瘤样增生而形成。肝血管瘤作为一种良性肿瘤，大多无症状，且无恶变倾向，原则上以随访观察为主。这是目前国内外普遍接受的观念。当血管瘤较大且合并危险因素时，建议酌情治疗。目前没有有效的中药治疗方法，建议到正规医院中医科就诊，遵医嘱中医治疗，并且定期复查，动态观察肿瘤变化。直径大于10cm或有发生外伤性破裂大出血的可能或肿瘤虽小，但有明显症状或不能排除肝癌的肝血管瘤可行手术切除。
肝血管瘤吃中药能不能治愈	肝脏血管瘤是最常见的肝良性肿瘤，多认为起源于肝内的胚胎性血管错构芽，由于某种因素作用，如服用类固醇激素、避孕药以及妇女怀孕等，引起肿瘤样增生而形成。肝血管瘤作为一种良性肿瘤，大多无症状，且无恶变倾向，原则上以随访观察为主。这是目前国内外普遍接受的观念。当血管瘤较大且合并危险因素时，建议酌情治疗。目前没有有效的中药治疗方法，建议到正规医院中医科就诊，遵医嘱中医治疗，并且定期复查，动态观察肿瘤变化。直径大于10cm或有发生外伤性破裂大出血的可能或肿瘤虽小，但有明显症状或不能排除肝癌的肝血管瘤可行手术切除。
肝血管瘤吃什么中药	肝脏血管瘤是最常见的肝良性肿瘤，多认为起源于肝内的胚胎性血管错构芽，由于某种因素作用，如服用类固醇激素、避孕药以及妇女怀孕等，引起肿瘤样增生而形成。肝血管瘤作为一种良性肿瘤，大多无症状，且无恶变倾向，原则上以随访观察为主。这是目前国内外普遍接受的观念。当血管瘤较大且合并危险因素时，建议酌情治疗。目前没有有效的中药治疗方法，建议到正规医院中医科就诊，遵医嘱中医治疗，并且定期复查，动态观察肿瘤变化。直径大于10cm或有发生外伤性破裂大出血的可能或肿瘤虽小，但有明显症状或不能排除肝癌的肝血管瘤可行手术切除。
肝血管瘤可以用中药治疗吗？	肝脏血管瘤是最常见的肝良性肿瘤，多认为起源于肝内的胚胎性血管错构芽，由于某种因素作用，如服用类固醇激素、避孕药以及妇女怀孕等，引起肿瘤样增生而形成。肝血管瘤作为一种良性肿瘤，大多无症状，且无恶变倾向，原则上以随访观察为主。这是目前国内外普遍接受的观念。当血管瘤较大且合并危险因素时，建议酌情治疗。目前没有有效的中药治疗方法，建议到正规医院中医科就诊，遵医嘱中医治疗，并且定期复查，动态观察肿瘤变化。直径大于10cm或有发生外伤性破裂大出血的可能或肿瘤虽小，但有明显症状或不能排除肝癌的肝血管瘤可行手术切除。
肝血管瘤，有中药，或中成药，可以治吗，	肝脏血管瘤是最常见的肝良性肿瘤，多认为起源于肝内的胚胎性血管错构芽，由于某种因素作用，如服用类固醇激素、避孕药以及妇女怀孕等，引起肿瘤样增生而形成。肝血管瘤作为一种良性肿瘤，大多无症状，且无恶变倾向，原则上以随访观察为主。这是目前国内外普遍接受的观念。当血管瘤较大且合并危险因素时，建议酌情治疗。目前没有有效的中药治疗方法，建议到正规医院中医科就诊，遵医嘱中医治疗，并且定期复查，动态观察肿瘤变化。直径大于10cm或有发生外伤性破裂大出血的可能或肿瘤虽小，但有明显症状或不能排除肝癌的肝血管瘤可行手术切除。
肝血管瘤的艾灸治疗效果好吗	肝脏血管瘤是最常见的肝良性肿瘤，多认为起源于肝内的胚胎性血管错构芽，由于某种因素作用，如服用类固醇激素、避孕药以及妇女怀孕等，引起肿瘤样增生而形成。肝血管瘤作为一种良性肿瘤，大多无症状，且无恶变倾向，原则上以随访观察为主。这是目前国内外普遍接受的观念。当血管瘤较大且合并危险因素时，建议酌情治疗。目前没有有效的中药治疗方法，建议到正规医院中医科就诊，遵医嘱中医治疗，并且定期复查，动态观察肿瘤变化。直径大于10cm或有发生外伤性破裂大出血的可能或肿瘤虽小，但有明显症状或不能排除肝癌的肝血管瘤可行手术切除。
什么中草药可以治疗肝血管瘤	肝脏血管瘤是最常见的肝良性肿瘤，多认为起源于肝内的胚胎性血管错构芽，由于某种因素作用，如服用类固醇激素、避孕药以及妇女怀孕等，引起肿瘤样增生而形成。肝血管瘤作为一种良性肿瘤，大多无症状，且无恶变倾向，原则上以随访观察为主。这是目前国内外普遍接受的观念。当血管瘤较大且合并危险因素时，建议酌情治疗。目前没有有效的中药治疗方法，建议到正规医院中医科就诊，遵医嘱中医治疗，并且定期复查，动态观察肿瘤变化。直径大于10cm或有发生外伤性破裂大出血的可能或肿瘤虽小，但有明显症状或不能排除肝癌的肝血管瘤可行手术切除。
肝血管瘤能中医治疗吗？	肝脏血管瘤是最常见的肝良性肿瘤，多认为起源于肝内的胚胎性血管错构芽，由于某种因素作用，如服用类固醇激素、避孕药以及妇女怀孕等，引起肿瘤样增生而形成。肝血管瘤作为一种良性肿瘤，大多无症状，且无恶变倾向，原则上以随访观察为主。这是目前国内外普遍接受的观念。当血管瘤较大且合并危险因素时，建议酌情治疗。目前没有有效的中药治疗方法，建议到正规医院中医科就诊，遵医嘱中医治疗，并且定期复查，动态观察肿瘤变化。直径大于10cm或有发生外伤性破裂大出血的可能或肿瘤虽小，但有明显症状或不能排除肝癌的肝血管瘤可行手术切除。
灵芝对肝血管瘤的作用？	肝脏血管瘤是最常见的肝良性肿瘤，多认为起源于肝内的胚胎性血管错构芽，由于某种因素作用，如服用类固醇激素、避孕药以及妇女怀孕等，引起肿瘤样增生而形成。肝血管瘤作为一种良性肿瘤，大多无症状，且无恶变倾向，原则上以随访观察为主。这是目前国内外普遍接受的观念。当血管瘤较大且合并危险因素时，建议酌情治疗。目前没有有效的中药治疗方法，建议到正规医院中医科就诊，遵医嘱中医治疗，并且定期复查，动态观察肿瘤变化。直径大于10cm或有发生外伤性破裂大出血的可能或肿瘤虽小，但有明显症状或不能排除肝癌的肝血管瘤可行手术切除。
得了肝血管瘤用中草药能治好吗？	肝脏血管瘤是最常见的肝良性肿瘤，多认为起源于肝内的胚胎性血管错构芽，由于某种因素作用，如服用类固醇激素、避孕药以及妇女怀孕等，引起肿瘤样增生而形成。肝血管瘤作为一种良性肿瘤，大多无症状，且无恶变倾向，原则上以随访观察为主。这是目前国内外普遍接受的观念。当血管瘤较大且合并危险因素时，建议酌情治疗。目前没有有效的中药治疗方法，建议到正规医院中医科就诊，遵医嘱中医治疗，并且定期复查，动态观察肿瘤变化。直径大于10cm或有发生外伤性破裂大出血的可能或肿瘤虽小，但有明显症状或不能排除肝癌的肝血管瘤可行手术切除。
中医怎么调理肝血管瘤？	肝脏血管瘤是最常见的肝良性肿瘤，多认为起源于肝内的胚胎性血管错构芽，由于某种因素作用，如服用类固醇激素、避孕药以及妇女怀孕等，引起肿瘤样增生而形成。肝血管瘤作为一种良性肿瘤，大多无症状，且无恶变倾向，原则上以随访观察为主。这是目前国内外普遍接受的观念。当血管瘤较大且合并危险因素时，建议酌情治疗。目前没有有效的中药治疗方法，建议到正规医院中医科就诊，遵医嘱中医治疗，并且定期复查，动态观察肿瘤变化。直径大于10cm或有发生外伤性破裂大出血的可能或肿瘤虽小，但有明显症状或不能排除肝癌的肝血管瘤可行手术切除。
中医怎么看待肝血管瘤	肝脏血管瘤是最常见的肝良性肿瘤，多认为起源于肝内的胚胎性血管错构芽，由于某种因素作用，如服用类固醇激素、避孕药以及妇女怀孕等，引起肿瘤样增生而形成。肝血管瘤作为一种良性肿瘤，大多无症状，且无恶变倾向，原则上以随访观察为主。这是目前国内外普遍接受的观念。当血管瘤较大且合并危险因素时，建议酌情治疗。目前没有有效的中药治疗方法，建议到正规医院中医科就诊，遵医嘱中医治疗，并且定期复查，动态观察肿瘤变化。直径大于10cm或有发生外伤性破裂大出血的可能或肿瘤虽小，但有明显症状或不能排除肝癌的肝血管瘤可行手术切除。
什么中草药治疗肝肿瘤？谢谢！	肝脏血管瘤是最常见的肝良性肿瘤，多认为起源于肝内的胚胎性血管错构芽，由于某种因素作用，如服用类固醇激素、避孕药以及妇女怀孕等，引起肿瘤样增生而形成。肝血管瘤作为一种良性肿瘤，大多无症状，且无恶变倾向，原则上以随访观察为主。这是目前国内外普遍接受的观念。当血管瘤较大且合并危险因素时，建议酌情治疗。目前没有有效的中药治疗方法，建议到正规医院中医科就诊，遵医嘱中医治疗，并且定期复查，动态观察肿瘤变化。直径大于10cm或有发生外伤性破裂大出血的可能或肿瘤虽小，但有明显症状或不能排除肝癌的肝血管瘤可行手术切除。
艾灸可以治疗肝血管瘤吗	肝脏血管瘤是最常见的肝良性肿瘤，多认为起源于肝内的胚胎性血管错构芽，由于某种因素作用，如服用类固醇激素、避孕药以及妇女怀孕等，引起肿瘤样增生而形成。肝血管瘤作为一种良性肿瘤，大多无症状，且无恶变倾向，原则上以随访观察为主。这是目前国内外普遍接受的观念。当血管瘤较大且合并危险因素时，建议酌情治疗。目前没有有效的中药治疗方法，建议到正规医院中医科就诊，遵医嘱中医治疗，并且定期复查，动态观察肿瘤变化。直径大于10cm或有发生外伤性破裂大出血的可能或肿瘤虽小，但有明显症状或不能排除肝癌的肝血管瘤可行手术切除。
肝血管瘤只吃药可以治好吗？	肝脏血管瘤是最常见的肝良性肿瘤，多认为起源于肝内的胚胎性血管错构芽，由于某种因素作用，如服用类固醇激素、避孕药以及妇女怀孕等，引起肿瘤样增生而形成。肝血管瘤作为一种良性肿瘤，大多无症状，且无恶变倾向，原则上以随访观察为主。这是目前国内外普遍接受的观念。当血管瘤较大且合并危险因素时，建议酌情治疗。目前没有有效的药物治疗方法，建议到正规医院肝胆外科或普外科就诊，遵医嘱治疗，并且定期复查，动态观察肿瘤变化。直径大于10cm或有发生外伤性破裂大出血的可能或肿瘤虽小，但有明显症状或不能排除肝癌的肝血管瘤可行手术切除。
吃什么能消除肝血管瘤	肝脏血管瘤是最常见的肝良性肿瘤，多认为起源于肝内的胚胎性血管错构芽，由于某种因素作用，如服用类固醇激素、避孕药以及妇女怀孕等，引起肿瘤样增生而形成。肝血管瘤作为一种良性肿瘤，大多无症状，且无恶变倾向，原则上以随访观察为主。这是目前国内外普遍接受的观念。当血管瘤较大且合并危险因素时，建议酌情治疗。目前没有有效的药物治疗方法，建议到正规医院肝胆外科或普外科就诊，遵医嘱治疗，并且定期复查，动态观察肿瘤变化。直径大于10cm或有发生外伤性破裂大出血的可能或肿瘤虽小，但有明显症状或不能排除肝癌的肝血管瘤可行手术切除。
肝血管瘤吃药能好吗？	肝脏血管瘤是最常见的肝良性肿瘤，多认为起源于肝内的胚胎性血管错构芽，由于某种因素作用，如服用类固醇激素、避孕药以及妇女怀孕等，引起肿瘤样增生而形成。肝血管瘤作为一种良性肿瘤，大多无症状，且无恶变倾向，原则上以随访观察为主。这是目前国内外普遍接受的观念。当血管瘤较大且合并危险因素时，建议酌情治疗。目前没有有效的药物治疗方法，建议到正规医院肝胆外科或普外科就诊，遵医嘱治疗，并且定期复查，动态观察肿瘤变化。直径大于10cm或有发生外伤性破裂大出血的可能或肿瘤虽小，但有明显症状或不能排除肝癌的肝血管瘤可行手术切除。
肝血管瘤要吃什么药	肝脏血管瘤是最常见的肝良性肿瘤，多认为起源于肝内的胚胎性血管错构芽，由于某种因素作用，如服用类固醇激素、避孕药以及妇女怀孕等，引起肿瘤样增生而形成。肝血管瘤作为一种良性肿瘤，大多无症状，且无恶变倾向，原则上以随访观察为主。这是目前国内外普遍接受的观念。当血管瘤较大且合并危险因素时，建议酌情治疗。目前没有有效的药物治疗方法，建议到正规医院肝胆外科或普外科就诊，遵医嘱治疗，并且定期复查，动态观察肿瘤变化。直径大于10cm或有发生外伤性破裂大出血的可能或肿瘤虽小，但有明显症状或不能排除肝癌的肝血管瘤可行手术切除。
肝血管瘤有药物治疗吗那种好	肝脏血管瘤是最常见的肝良性肿瘤，多认为起源于肝内的胚胎性血管错构芽，由于某种因素作用，如服用类固醇激素、避孕药以及妇女怀孕等，引起肿瘤样增生而形成。肝血管瘤作为一种良性肿瘤，大多无症状，且无恶变倾向，原则上以随访观察为主。这是目前国内外普遍接受的观念。当血管瘤较大且合并危险因素时，建议酌情治疗。目前没有有效的药物治疗方法，建议到正规医院肝胆外科或普外科就诊，遵医嘱治疗，并且定期复查，动态观察肿瘤变化。直径大于10cm或有发生外伤性破裂大出血的可能或肿瘤虽小，但有明显症状或不能排除肝癌的肝血管瘤可行手术切除。
肝血管瘤吃药能治好吗？	肝脏血管瘤是最常见的肝良性肿瘤，多认为起源于肝内的胚胎性血管错构芽，由于某种因素作用，如服用类固醇激素、避孕药以及妇女怀孕等，引起肿瘤样增生而形成。肝血管瘤作为一种良性肿瘤，大多无症状，且无恶变倾向，原则上以随访观察为主。这是目前国内外普遍接受的观念。当血管瘤较大且合并危险因素时，建议酌情治疗。目前没有有效的药物治疗方法，建议到正规医院肝胆外科或普外科就诊，遵医嘱治疗，并且定期复查，动态观察肿瘤变化。直径大于10cm或有发生外伤性破裂大出血的可能或肿瘤虽小，但有明显症状或不能排除肝癌的肝血管瘤可行手术切除。
肝上有血管瘤吃什么药？	肝脏血管瘤是最常见的肝良性肿瘤，多认为起源于肝内的胚胎性血管错构芽，由于某种因素作用，如服用类固醇激素、避孕药以及妇女怀孕等，引起肿瘤样增生而形成。肝血管瘤作为一种良性肿瘤，大多无症状，且无恶变倾向，原则上以随访观察为主。这是目前国内外普遍接受的观念。当血管瘤较大且合并危险因素时，建议酌情治疗。目前没有有效的药物治疗方法，建议到正规医院肝胆外科或普外科就诊，遵医嘱治疗，并且定期复查，动态观察肿瘤变化。直径大于10cm或有发生外伤性破裂大出血的可能或肿瘤虽小，但有明显症状或不能排除肝癌的肝血管瘤可行手术切除。
您好：我肝部右叶长了血管瘤吃什么药呢？	肝脏血管瘤是最常见的肝良性肿瘤，多认为起源于肝内的胚胎性血管错构芽，由于某种因素作用，如服用类固醇激素、避孕药以及妇女怀孕等，引起肿瘤样增生而形成。肝血管瘤作为一种良性肿瘤，大多无症状，且无恶变倾向，原则上以随访观察为主。这是目前国内外普遍接受的观念。当血管瘤较大且合并危险因素时，建议酌情治疗。目前没有有效的药物治疗方法，建议到正规医院肝胆外科或普外科就诊，遵医嘱治疗，并且定期复查，动态观察肿瘤变化。直径大于10cm或有发生外伤性破裂大出血的可能或肿瘤虽小，但有明显症状或不能排除肝癌的肝血管瘤可行手术切除。
肝血管瘤一般都吃什么药？	肝脏血管瘤是最常见的肝良性肿瘤，多认为起源于肝内的胚胎性血管错构芽，由于某种因素作用，如服用类固醇激素、避孕药以及妇女怀孕等，引起肿瘤样增生而形成。肝血管瘤作为一种良性肿瘤，大多无症状，且无恶变倾向，原则上以随访观察为主。这是目前国内外普遍接受的观念。当血管瘤较大且合并危险因素时，建议酌情治疗。目前没有有效的药物治疗方法，建议到正规医院肝胆外科或普外科就诊，遵医嘱治疗，并且定期复查，动态观察肿瘤变化。直径大于10cm或有发生外伤性破裂大出血的可能或肿瘤虽小，但有明显症状或不能排除肝癌的肝血管瘤可行手术切除。
用药物可以治疗肝血管瘤吗？	肝脏血管瘤是最常见的肝良性肿瘤，多认为起源于肝内的胚胎性血管错构芽，由于某种因素作用，如服用类固醇激素、避孕药以及妇女怀孕等，引起肿瘤样增生而形成。肝血管瘤作为一种良性肿瘤，大多无症状，且无恶变倾向，原则上以随访观察为主。这是目前国内外普遍接受的观念。当血管瘤较大且合并危险因素时，建议酌情治疗。目前没有有效的药物治疗方法，建议到正规医院肝胆外科或普外科就诊，遵医嘱治疗，并且定期复查，动态观察肿瘤变化。直径大于10cm或有发生外伤性破裂大出血的可能或肿瘤虽小，但有明显症状或不能排除肝癌的肝血管瘤可行手术切除。
肝脏内有泡沫壮血管瘤可以吃护肝片吗	肝脏血管瘤是最常见的肝良性肿瘤，多认为起源于肝内的胚胎性血管错构芽，由于某种因素作用，如服用类固醇激素、避孕药以及妇女怀孕等，引起肿瘤样增生而形成。肝血管瘤作为一种良性肿瘤，大多无症状，且无恶变倾向，原则上以随访观察为主。这是目前国内外普遍接受的观念。当血管瘤较大且合并危险因素时，建议酌情治疗。肝血管瘤患者可能因血管瘤体积大、生长速度快出现肝功能受损的并发症，建议到正规医院肝胆外科或普外科就诊，遵医嘱治疗。
肝血管瘤变小的原因？	肝血管瘤属肝脏良性病变，无明显恶变表现及倾向，但不治疗不会自己消失，小的无症状的肝血管瘤不需治疗，但应每隔3-6个月做B超检查，动态观察肿瘤变化。直径大于10cm或有发生外伤性破裂大出血的可能或肿瘤虽小，但有明显症状或不能排除肝癌的肝血管瘤可行手术切除。若出现肝血管瘤变小情况，建议到正规医院就诊完善超声、CT等检查，排除肝血管瘤破裂可能。
肝血管瘤会自己消失吗	肝血管瘤属肝脏良性病变，无明显恶变表现及倾向，但不治疗不会自己消失，小的无症状的肝血管瘤不需治疗，但应每隔3-6个月做B超检查，动态观察肿瘤变化。直径大于10cm或有发生外伤性破裂大出血的可能或肿瘤虽小，但有明显症状或不能排除肝癌的肝血管瘤可行手术切除。若出现肝血管瘤变小情况，建议到正规医院就诊完善超声、CT等检查，排除肝血管瘤破裂可能。
肝血管瘤这一般都是会消失吗	肝血管瘤属肝脏良性病变，无明显恶变表现及倾向，但不治疗不会自己消失，小的无症状的肝血管瘤不需治疗，但应每隔3-6个月做B超检查，动态观察肿瘤变化。直径大于10cm或有发生外伤性破裂大出血的可能或肿瘤虽小，但有明显症状或不能排除肝癌的肝血管瘤可行手术切除。若出现肝血管瘤变小情况，建议到正规医院就诊完善超声、CT等检查，排除肝血管瘤破裂可能。
怀孕肝血管瘤会长大吗？	肝血管瘤属肝脏良性病变，无明显恶变表现及倾向，但不治疗不会自己消失，小的无症状的肝血管瘤不需治疗，但应每隔3-6个月做B超检查，动态观察肿瘤变化。直径大于10cm或有发生外伤性破裂大出血的可能或肿瘤虽小，但有明显症状或不能排除肝癌的肝血管瘤可行手术切除。若出现肝血管瘤变小情况，建议到正规医院就诊完善超声、CT等检查，排除肝血管瘤破裂可能。
7mm肝血管瘤可以自愈吗？	肝血管瘤属肝脏良性病变，无明显恶变表现及倾向，但不治疗不会自己消失，小的无症状的肝血管瘤不需治疗，但应每隔3-6个月做B超检查，动态观察肿瘤变化。直径大于10cm或有发生外伤性破裂大出血的可能或肿瘤虽小，但有明显症状或不能排除肝癌的肝血管瘤可行手术切除。若出现肝血管瘤变小情况，建议到正规医院就诊完善超声、CT等检查，排除肝血管瘤破裂可能。
肝血管瘤一年后消失了	肝血管瘤属肝脏良性病变，无明显恶变表现及倾向，但不治疗不会自己消失，小的无症状的肝血管瘤不需治疗，但应每隔3-6个月做B超检查，动态观察肿瘤变化。直径大于10cm或有发生外伤性破裂大出血的可能或肿瘤虽小，但有明显症状或不能排除肝癌的肝血管瘤可行手术切除。若出现肝血管瘤变小情况，建议到正规医院就诊完善超声、CT等检查，排除肝血管瘤破裂可能。
肝血管瘤会不会自己消失啊	肝血管瘤属肝脏良性病变，无明显恶变表现及倾向，但不治疗不会自己消失，小的无症状的肝血管瘤不需治疗，但应每隔3-6个月做B超检查，动态观察肿瘤变化。直径大于10cm或有发生外伤性破裂大出血的可能或肿瘤虽小，但有明显症状或不能排除肝癌的肝血管瘤可行手术切除。若出现肝血管瘤变小情况，建议到正规医院就诊完善超声、CT等检查，排除肝血管瘤破裂可能。
肝血管瘤会不会自动消失呢？	肝血管瘤属肝脏良性病变，无明显恶变表现及倾向，但不治疗不会自己消失，小的无症状的肝血管瘤不需治疗，但应每隔3-6个月做B超检查，动态观察肿瘤变化。直径大于10cm或有发生外伤性破裂大出血的可能或肿瘤虽小，但有明显症状或不能排除肝癌的肝血管瘤可行手术切除。若出现肝血管瘤变小情况，建议到正规医院就诊完善超声、CT等检查，排除肝血管瘤破裂可能。
肝血管瘤会自动消失吗？	肝血管瘤属肝脏良性病变，无明显恶变表现及倾向，但不治疗不会自己消失，小的无症状的肝血管瘤不需治疗，但应每隔3-6个月做B超检查，动态观察肿瘤变化。直径大于10cm或有发生外伤性破裂大出血的可能或肿瘤虽小，但有明显症状或不能排除肝癌的肝血管瘤可行手术切除。若出现肝血管瘤变小情况，建议到正规医院就诊完善超声、CT等检查，排除肝血管瘤破裂可能。
肝血管瘤会不会自动消失	肝血管瘤属肝脏良性病变，无明显恶变表现及倾向，但不治疗不会自己消失，小的无症状的肝血管瘤不需治疗，但应每隔3-6个月做B超检查，动态观察肿瘤变化。直径大于10cm或有发生外伤性破裂大出血的可能或肿瘤虽小，但有明显症状或不能排除肝癌的肝血管瘤可行手术切除。若出现肝血管瘤变小情况，建议到正规医院就诊完善超声、CT等检查，排除肝血管瘤破裂可能。
肝血管瘤能完全消失吗？	肝血管瘤属肝脏良性病变，无明显恶变表现及倾向，但不治疗不会自己消失，小的无症状的肝血管瘤不需治疗，但应每隔3-6个月做B超检查，动态观察肿瘤变化。直径大于10cm或有发生外伤性破裂大出血的可能或肿瘤虽小，但有明显症状或不能排除肝癌的肝血管瘤可行手术切除。若出现肝血管瘤变小情况，建议到正规医院就诊完善超声、CT等检查，排除肝血管瘤破裂可能。
肝血管瘤会停止生长吗？	肝血管瘤属肝脏良性病变，无明显恶变表现及倾向，但不治疗不会自己消失，小的无症状的肝血管瘤不需治疗，但应每隔3-6个月做B超检查，动态观察肿瘤变化。直径大于10cm或有发生外伤性破裂大出血的可能或肿瘤虽小，但有明显症状或不能排除肝癌的肝血管瘤可行手术切除。若出现肝血管瘤变小情况，建议到正规医院就诊完善超声、CT等检查，排除肝血管瘤破裂可能。
肝血管瘤有生命危险吗？	肝血管瘤作为一种良性肿瘤，大多无症状，且无恶变倾向，原则上以随访观察为主。这是目前国内外普遍接受的观念。肝血管瘤严重程度取决于肝血管瘤的生长速度和大小。当血管瘤较大且合并危险因素时，建议酌情治疗。肝血管瘤一点都不可怕，不会直接导致死亡，发现之后要保持平和心态。平时要避免过度劳累和剧烈运动，不要让肝区受到外力碰撞以免肝血管瘤破裂而出现严重的并发症。要定期去医院作复查。手术切除是最彻底的方法，此外还有局部消融术、肝动脉介入栓塞术等方法可以治疗肝血管瘤。口服药对较大的血管瘤效果不佳。这些治疗方法都有其相应的适应症与禁忌症，建议到正规医院就诊后评估病情，必要时多学科会诊联合评估，决定进一步治疗方案。
肝血管瘤对身体会有影响么？	肝血管瘤作为一种良性肿瘤，大多无症状，且无恶变倾向，原则上以随访观察为主。这是目前国内外普遍接受的观念。肝血管瘤严重程度取决于肝血管瘤的生长速度和大小。当血管瘤较大且合并危险因素时，建议酌情治疗。肝血管瘤一点都不可怕，不会直接导致死亡，发现之后要保持平和心态。平时要避免过度劳累和剧烈运动，不要让肝区受到外力碰撞以免肝血管瘤破裂而出现严重的并发症。要定期去医院作复查。手术切除是最彻底的方法，此外还有局部消融术、肝动脉介入栓塞术等方法可以治疗肝血管瘤。口服药对较大的血管瘤效果不佳。这些治疗方法都有其相应的适应症与禁忌症，建议到正规医院就诊后评估病情，必要时多学科会诊联合评估，决定进一步治疗方案。
肝脏血管瘤会癌变吗	肝血管瘤作为一种良性肿瘤，大多无症状，且无恶变倾向，原则上以随访观察为主。这是目前国内外普遍接受的观念。肝血管瘤严重程度取决于肝血管瘤的生长速度和大小。当血管瘤较大且合并危险因素时，建议酌情治疗。肝血管瘤一点都不可怕，不会直接导致死亡，发现之后要保持平和心态。平时要避免过度劳累和剧烈运动，不要让肝区受到外力碰撞以免肝血管瘤破裂而出现严重的并发症。要定期去医院作复查。手术切除是最彻底的方法，此外还有局部消融术、肝动脉介入栓塞术等方法可以治疗肝血管瘤。口服药对较大的血管瘤效果不佳。这些治疗方法都有其相应的适应症与禁忌症，建议到正规医院就诊后评估病情，必要时多学科会诊联合评估，决定进一步治疗方案。
肝7分段血管瘤严重吗会癌？	肝血管瘤作为一种良性肿瘤，大多无症状，且无恶变倾向，原则上以随访观察为主。这是目前国内外普遍接受的观念。肝血管瘤严重程度取决于肝血管瘤的生长速度和大小。当血管瘤较大且合并危险因素时，建议酌情治疗。肝血管瘤一点都不可怕，不会直接导致死亡，发现之后要保持平和心态。平时要避免过度劳累和剧烈运动，不要让肝区受到外力碰撞以免肝血管瘤破裂而出现严重的并发症。要定期去医院作复查。手术切除是最彻底的方法，此外还有局部消融术、肝动脉介入栓塞术等方法可以治疗肝血管瘤。口服药对较大的血管瘤效果不佳。这些治疗方法都有其相应的适应症与禁忌症，建议到正规医院就诊后评估病情，必要时多学科会诊联合评估，决定进一步治疗方案。
肝上有血管瘤会癌变吗	肝血管瘤作为一种良性肿瘤，大多无症状，且无恶变倾向，原则上以随访观察为主。这是目前国内外普遍接受的观念。肝血管瘤严重程度取决于肝血管瘤的生长速度和大小。当血管瘤较大且合并危险因素时，建议酌情治疗。肝血管瘤一点都不可怕，不会直接导致死亡，发现之后要保持平和心态。平时要避免过度劳累和剧烈运动，不要让肝区受到外力碰撞以免肝血管瘤破裂而出现严重的并发症。要定期去医院作复查。手术切除是最彻底的方法，此外还有局部消融术、肝动脉介入栓塞术等方法可以治疗肝血管瘤。口服药对较大的血管瘤效果不佳。这些治疗方法都有其相应的适应症与禁忌症，建议到正规医院就诊后评估病情，必要时多学科会诊联合评估，决定进一步治疗方案。
肝上有多发性血管瘤严重吗	肝血管瘤作为一种良性肿瘤，大多无症状，且无恶变倾向，原则上以随访观察为主。这是目前国内外普遍接受的观念。肝血管瘤严重程度取决于肝血管瘤的生长速度和大小。当血管瘤较大且合并危险因素时，建议酌情治疗。肝血管瘤一点都不可怕，不会直接导致死亡，发现之后要保持平和心态。平时要避免过度劳累和剧烈运动，不要让肝区受到外力碰撞以免肝血管瘤破裂而出现严重的并发症。要定期去医院作复查。手术切除是最彻底的方法，此外还有局部消融术、肝动脉介入栓塞术等方法可以治疗肝血管瘤。口服药对较大的血管瘤效果不佳。这些治疗方法都有其相应的适应症与禁忌症，建议到正规医院就诊后评估病情，必要时多学科会诊联合评估，决定进一步治疗方案。
脂肪肝和肝上长血管瘤病情严不严重？	肝血管瘤作为一种良性肿瘤，大多无症状，且无恶变倾向，原则上以随访观察为主。这是目前国内外普遍接受的观念。肝血管瘤严重程度取决于肝血管瘤的生长速度和大小。当血管瘤较大且合并危险因素时，建议酌情治疗。肝血管瘤一点都不可怕，不会直接导致死亡，发现之后要保持平和心态。平时要避免过度劳累和剧烈运动，不要让肝区受到外力碰撞以免肝血管瘤破裂而出现严重的并发症。要定期去医院作复查。手术切除是最彻底的方法，此外还有局部消融术、肝动脉介入栓塞术等方法可以治疗肝血管瘤。口服药对较大的血管瘤效果不佳。这些治疗方法都有其相应的适应症与禁忌症，建议到正规医院就诊后评估病情，必要时多学科会诊联合评估，决定进一步治疗方案。
我肝上有血管瘤，时间长了会不会癌变？	肝血管瘤作为一种良性肿瘤，大多无症状，且无恶变倾向，原则上以随访观察为主。这是目前国内外普遍接受的观念。肝血管瘤严重程度取决于肝血管瘤的生长速度和大小。当血管瘤较大且合并危险因素时，建议酌情治疗。肝血管瘤一点都不可怕，不会直接导致死亡，发现之后要保持平和心态。平时要避免过度劳累和剧烈运动，不要让肝区受到外力碰撞以免肝血管瘤破裂而出现严重的并发症。要定期去医院作复查。手术切除是最彻底的方法，此外还有局部消融术、肝动脉介入栓塞术等方法可以治疗肝血管瘤。口服药对较大的血管瘤效果不佳。这些治疗方法都有其相应的适应症与禁忌症，建议到正规医院就诊后评估病情，必要时多学科会诊联合评估，决定进一步治疗方案。
肝多发肝血管瘤要不要紧	肝血管瘤作为一种良性肿瘤，大多无症状，且无恶变倾向，原则上以随访观察为主。这是目前国内外普遍接受的观念。肝血管瘤严重程度取决于肝血管瘤的生长速度和大小。当血管瘤较大且合并危险因素时，建议酌情治疗。肝血管瘤一点都不可怕，不会直接导致死亡，发现之后要保持平和心态。平时要避免过度劳累和剧烈运动，不要让肝区受到外力碰撞以免肝血管瘤破裂而出现严重的并发症。要定期去医院作复查。手术切除是最彻底的方法，此外还有局部消融术、肝动脉介入栓塞术等方法可以治疗肝血管瘤。口服药对较大的血管瘤效果不佳。这些治疗方法都有其相应的适应症与禁忌症，建议到正规医院就诊后评估病情，必要时多学科会诊联合评估，决定进一步治疗方案。
男肝脏上长了个良性肿瘤有事吗?会变恶性吗	肝血管瘤作为一种良性肿瘤，大多无症状，且无恶变倾向，原则上以随访观察为主。这是目前国内外普遍接受的观念。肝血管瘤严重程度取决于肝血管瘤的生长速度和大小。当血管瘤较大且合并危险因素时，建议酌情治疗。肝血管瘤一点都不可怕，不会直接导致死亡，发现之后要保持平和心态。平时要避免过度劳累和剧烈运动，不要让肝区受到外力碰撞以免肝血管瘤破裂而出现严重的并发症。要定期去医院作复查。手术切除是最彻底的方法，此外还有局部消融术、肝动脉介入栓塞术等方法可以治疗肝血管瘤。口服药对较大的血管瘤效果不佳。这些治疗方法都有其相应的适应症与禁忌症，建议到正规医院就诊后评估病情，必要时多学科会诊联合评估，决定进一步治疗方案。
肝部血管瘤长大的很快会不会是癌变啊？	肝血管瘤作为一种良性肿瘤，大多无症状，且无恶变倾向，原则上以随访观察为主。这是目前国内外普遍接受的观念。肝血管瘤严重程度取决于肝血管瘤的生长速度和大小。当血管瘤较大且合并危险因素时，建议酌情治疗。肝血管瘤一点都不可怕，不会直接导致死亡，发现之后要保持平和心态。平时要避免过度劳累和剧烈运动，不要让肝区受到外力碰撞以免肝血管瘤破裂而出现严重的并发症。要定期去医院作复查。手术切除是最彻底的方法，此外还有局部消融术、肝动脉介入栓塞术等方法可以治疗肝血管瘤。口服药对较大的血管瘤效果不佳。这些治疗方法都有其相应的适应症与禁忌症，建议到正规医院就诊后评估病情，必要时多学科会诊联合评估，决定进一步治疗方案。
肝血管瘤这到底有生命危险吗？	肝血管瘤作为一种良性肿瘤，大多无症状，且无恶变倾向，原则上以随访观察为主。这是目前国内外普遍接受的观念。肝血管瘤严重程度取决于肝血管瘤的生长速度和大小。当血管瘤较大且合并危险因素时，建议酌情治疗。肝血管瘤一点都不可怕，不会直接导致死亡，发现之后要保持平和心态。平时要避免过度劳累和剧烈运动，不要让肝区受到外力碰撞以免肝血管瘤破裂而出现严重的并发症。要定期去医院作复查。手术切除是最彻底的方法，此外还有局部消融术、肝动脉介入栓塞术等方法可以治疗肝血管瘤。口服药对较大的血管瘤效果不佳。这些治疗方法都有其相应的适应症与禁忌症，建议到正规医院就诊后评估病情，必要时多学科会诊联合评估，决定进一步治疗方案。
体检查出肝上长血管瘤,会癌变吗	肝血管瘤作为一种良性肿瘤，大多无症状，且无恶变倾向，原则上以随访观察为主。这是目前国内外普遍接受的观念。肝血管瘤严重程度取决于肝血管瘤的生长速度和大小。当血管瘤较大且合并危险因素时，建议酌情治疗。肝血管瘤一点都不可怕，不会直接导致死亡，发现之后要保持平和心态。平时要避免过度劳累和剧烈运动，不要让肝区受到外力碰撞以免肝血管瘤破裂而出现严重的并发症。要定期去医院作复查。手术切除是最彻底的方法，此外还有局部消融术、肝动脉介入栓塞术等方法可以治疗肝血管瘤。口服药对较大的血管瘤效果不佳。这些治疗方法都有其相应的适应症与禁忌症，建议到正规医院就诊后评估病情，必要时多学科会诊联合评估，决定进一步治疗方案。
肝血管瘤会死吗？	肝血管瘤作为一种良性肿瘤，大多无症状，且无恶变倾向，原则上以随访观察为主。这是目前国内外普遍接受的观念。肝血管瘤严重程度取决于肝血管瘤的生长速度和大小。当血管瘤较大且合并危险因素时，建议酌情治疗。肝血管瘤一点都不可怕，不会直接导致死亡，发现之后要保持平和心态。平时要避免过度劳累和剧烈运动，不要让肝区受到外力碰撞以免肝血管瘤破裂而出现严重的并发症。要定期去医院作复查。手术切除是最彻底的方法，此外还有局部消融术、肝动脉介入栓塞术等方法可以治疗肝血管瘤。口服药对较大的血管瘤效果不佳。这些治疗方法都有其相应的适应症与禁忌症，建议到正规医院就诊后评估病情，必要时多学科会诊联合评估，决定进一步治疗方案。
肝血管瘤会不会转变成肝癌吗？	肝血管瘤作为一种良性肿瘤，大多无症状，且无恶变倾向，原则上以随访观察为主。这是目前国内外普遍接受的观念。肝血管瘤严重程度取决于肝血管瘤的生长速度和大小。当血管瘤较大且合并危险因素时，建议酌情治疗。肝血管瘤一点都不可怕，不会直接导致死亡，发现之后要保持平和心态。平时要避免过度劳累和剧烈运动，不要让肝区受到外力碰撞以免肝血管瘤破裂而出现严重的并发症。要定期去医院作复查。手术切除是最彻底的方法，此外还有局部消融术、肝动脉介入栓塞术等方法可以治疗肝血管瘤。口服药对较大的血管瘤效果不佳。这些治疗方法都有其相应的适应症与禁忌症，建议到正规医院就诊后评估病情，必要时多学科会诊联合评估，决定进一步治疗方案。
肝血管瘤后期注意饮食跟运动后，他会消失吗	肝血管瘤属肝脏良性病变，无明显恶变表现及倾向，但不治疗不会自己消失，小的无症状的肝血管瘤不需治疗，但应每隔3-6个月做B超检查，动态观察肿瘤变化。直径大于10cm或有发生外伤性破裂大出血的可能或肿瘤虽小，但有明显症状或不能排除肝癌的肝血管瘤可行手术切除。若出现肝血管瘤变小情况，建议到正规医院就诊完善超声、CT等检查，排除肝血管瘤破裂可能。
肝血管瘤会变成癌症吗？	肝血管瘤作为一种良性肿瘤，大多无症状，且无恶变倾向，原则上以随访观察为主。这是目前国内外普遍接受的观念。肝血管瘤严重程度取决于肝血管瘤的生长速度和大小。当血管瘤较大且合并危险因素时，建议酌情治疗。肝血管瘤一点都不可怕，不会直接导致死亡，发现之后要保持平和心态。平时要避免过度劳累和剧烈运动，不要让肝区受到外力碰撞以免肝血管瘤破裂而出现严重的并发症。要定期去医院作复查。手术切除是最彻底的方法，此外还有局部消融术、肝动脉介入栓塞术等方法可以治疗肝血管瘤。口服药对较大的血管瘤效果不佳。这些治疗方法都有其相应的适应症与禁忌症，建议到正规医院就诊后评估病情，必要时多学科会诊联合评估，决定进一步治疗方案。
肝血管瘤会转变肝癌吗？	肝血管瘤作为一种良性肿瘤，大多无症状，且无恶变倾向，原则上以随访观察为主。这是目前国内外普遍接受的观念。肝血管瘤严重程度取决于肝血管瘤的生长速度和大小。当血管瘤较大且合并危险因素时，建议酌情治疗。肝血管瘤一点都不可怕，不会直接导致死亡，发现之后要保持平和心态。平时要避免过度劳累和剧烈运动，不要让肝区受到外力碰撞以免肝血管瘤破裂而出现严重的并发症。要定期去医院作复查。手术切除是最彻底的方法，此外还有局部消融术、肝动脉介入栓塞术等方法可以治疗肝血管瘤。口服药对较大的血管瘤效果不佳。这些治疗方法都有其相应的适应症与禁忌症，建议到正规医院就诊后评估病情，必要时多学科会诊联合评估，决定进一步治疗方案。
肝血管瘤会转化成肝癌吗？	肝血管瘤作为一种良性肿瘤，大多无症状，且无恶变倾向，原则上以随访观察为主。这是目前国内外普遍接受的观念。肝血管瘤严重程度取决于肝血管瘤的生长速度和大小。当血管瘤较大且合并危险因素时，建议酌情治疗。肝血管瘤一点都不可怕，不会直接导致死亡，发现之后要保持平和心态。平时要避免过度劳累和剧烈运动，不要让肝区受到外力碰撞以免肝血管瘤破裂而出现严重的并发症。要定期去医院作复查。手术切除是最彻底的方法，此外还有局部消融术、肝动脉介入栓塞术等方法可以治疗肝血管瘤。口服药对较大的血管瘤效果不佳。这些治疗方法都有其相应的适应症与禁忌症，建议到正规医院就诊后评估病情，必要时多学科会诊联合评估，决定进一步治疗方案。
肝血管瘤会发生癌变吗？	肝血管瘤作为一种良性肿瘤，大多无症状，且无恶变倾向，原则上以随访观察为主。这是目前国内外普遍接受的观念。肝血管瘤严重程度取决于肝血管瘤的生长速度和大小。当血管瘤较大且合并危险因素时，建议酌情治疗。肝血管瘤一点都不可怕，不会直接导致死亡，发现之后要保持平和心态。平时要避免过度劳累和剧烈运动，不要让肝区受到外力碰撞以免肝血管瘤破裂而出现严重的并发症。要定期去医院作复查。手术切除是最彻底的方法，此外还有局部消融术、肝动脉介入栓塞术等方法可以治疗肝血管瘤。口服药对较大的血管瘤效果不佳。这些治疗方法都有其相应的适应症与禁忌症，建议到正规医院就诊后评估病情，必要时多学科会诊联合评估，决定进一步治疗方案。
肝内血管瘤会癌变吗	肝血管瘤作为一种良性肿瘤，大多无症状，且无恶变倾向，原则上以随访观察为主。这是目前国内外普遍接受的观念。肝血管瘤严重程度取决于肝血管瘤的生长速度和大小。当血管瘤较大且合并危险因素时，建议酌情治疗。肝血管瘤一点都不可怕，不会直接导致死亡，发现之后要保持平和心态。平时要避免过度劳累和剧烈运动，不要让肝区受到外力碰撞以免肝血管瘤破裂而出现严重的并发症。要定期去医院作复查。手术切除是最彻底的方法，此外还有局部消融术、肝动脉介入栓塞术等方法可以治疗肝血管瘤。口服药对较大的血管瘤效果不佳。这些治疗方法都有其相应的适应症与禁忌症，建议到正规医院就诊后评估病情，必要时多学科会诊联合评估，决定进一步治疗方案。
肝血管瘤会不会变成肝癌吗	肝血管瘤作为一种良性肿瘤，大多无症状，且无恶变倾向，原则上以随访观察为主。这是目前国内外普遍接受的观念。肝血管瘤严重程度取决于肝血管瘤的生长速度和大小。当血管瘤较大且合并危险因素时，建议酌情治疗。肝血管瘤一点都不可怕，不会直接导致死亡，发现之后要保持平和心态。平时要避免过度劳累和剧烈运动，不要让肝区受到外力碰撞以免肝血管瘤破裂而出现严重的并发症。要定期去医院作复查。手术切除是最彻底的方法，此外还有局部消融术、肝动脉介入栓塞术等方法可以治疗肝血管瘤。口服药对较大的血管瘤效果不佳。这些治疗方法都有其相应的适应症与禁忌症，建议到正规医院就诊后评估病情，必要时多学科会诊联合评估，决定进一步治疗方案。
肝血管瘤长得很快，且有疼痛，是肝癌吗	肝血管瘤作为一种良性肿瘤，大多无症状，且无恶变倾向，原则上以随访观察为主。这是目前国内外普遍接受的观念。肝血管瘤严重程度取决于肝血管瘤的生长速度和大小。当血管瘤较大且合并危险因素时，建议酌情治疗。生长速度过快有可能引起疼痛还有憋闷感。建议于正规医院就诊完善检查及鉴别诊断。同时每隔3-6个月做B超检查，动态观察肿瘤变化。直径大于10cm或有发生外伤性破裂大出血的可能或肿瘤虽小，但有明显症状或不能排除肝癌的肝血管瘤可行手术切除。
肝血管瘤一般生长速度快吗？	肝血管瘤作为一种良性肿瘤，大多无症状，且无恶变倾向，原则上以随访观察为主。这是目前国内外普遍接受的观念。肝血管瘤严重程度取决于肝血管瘤的生长速度和大小。当血管瘤较大且合并危险因素时，建议酌情治疗。生长速度过快有可能引起疼痛还有憋闷感。建议于正规医院就诊完善检查及鉴别诊断。同时每隔3-6个月做B超检查，动态观察肿瘤变化。直径大于10cm或有发生外伤性破裂大出血的可能或肿瘤虽小，但有明显症状或不能排除肝癌的肝血管瘤可行手术切除。
肝血管瘤，生长速度是不是有点快	肝血管瘤作为一种良性肿瘤，大多无症状，且无恶变倾向，原则上以随访观察为主。这是目前国内外普遍接受的观念。肝血管瘤严重程度取决于肝血管瘤的生长速度和大小。当血管瘤较大且合并危险因素时，建议酌情治疗。生长速度过快有可能引起疼痛还有憋闷感。建议于正规医院就诊完善检查及鉴别诊断。同时每隔3-6个月做B超检查，动态观察肿瘤变化。直径大于10cm或有发生外伤性破裂大出血的可能或肿瘤虽小，但有明显症状或不能排除肝癌的肝血管瘤可行手术切除。
肝血管瘤生长速度很快应该怎么办呢？	肝血管瘤作为一种良性肿瘤，大多无症状，且无恶变倾向，原则上以随访观察为主。这是目前国内外普遍接受的观念。肝血管瘤严重程度取决于肝血管瘤的生长速度和大小。当血管瘤较大且合并危险因素时，建议酌情治疗。生长速度过快有可能引起疼痛还有憋闷感。建议于正规医院就诊完善检查及鉴别诊断。同时每隔3-6个月做B超检查，动态观察肿瘤变化。直径大于10cm或有发生外伤性破裂大出血的可能或肿瘤虽小，但有明显症状或不能排除肝癌的肝血管瘤可行手术切除。
肝血管瘤长大的很快会不会有问题？	肝血管瘤作为一种良性肿瘤，大多无症状，且无恶变倾向，原则上以随访观察为主。这是目前国内外普遍接受的观念。肝血管瘤严重程度取决于肝血管瘤的生长速度和大小。当血管瘤较大且合并危险因素时，建议酌情治疗。生长速度过快有可能引起疼痛还有憋闷感。建议于正规医院就诊完善检查及鉴别诊断。同时每隔3-6个月做B超检查，动态观察肿瘤变化。直径大于10cm或有发生外伤性破裂大出血的可能或肿瘤虽小，但有明显症状或不能排除肝癌的肝血管瘤可行手术切除。
肝血管瘤生长速度是不是有点快	肝血管瘤作为一种良性肿瘤，大多无症状，且无恶变倾向，原则上以随访观察为主。这是目前国内外普遍接受的观念。肝血管瘤严重程度取决于肝血管瘤的生长速度和大小。当血管瘤较大且合并危险因素时，建议酌情治疗。生长速度过快有可能引起疼痛还有憋闷感。建议于正规医院就诊完善检查及鉴别诊断。同时每隔3-6个月做B超检查，动态观察肿瘤变化。直径大于10cm或有发生外伤性破裂大出血的可能或肿瘤虽小，但有明显症状或不能排除肝癌的肝血管瘤可行手术切除。
肝血管瘤增长速度快吗	肝血管瘤作为一种良性肿瘤，大多无症状，且无恶变倾向，原则上以随访观察为主。这是目前国内外普遍接受的观念。肝血管瘤严重程度取决于肝血管瘤的生长速度和大小。当血管瘤较大且合并危险因素时，建议酌情治疗。生长速度过快有可能引起疼痛还有憋闷感。建议于正规医院就诊完善检查及鉴别诊断。同时每隔3-6个月做B超检查，动态观察肿瘤变化。直径大于10cm或有发生外伤性破裂大出血的可能或肿瘤虽小，但有明显症状或不能排除肝癌的肝血管瘤可行手术切除。
肝血管瘤会大起来吗？	肝血管瘤作为一种良性肿瘤，大多无症状，且无恶变倾向，原则上以随访观察为主。这是目前国内外普遍接受的观念。肝血管瘤严重程度取决于肝血管瘤的生长速度和大小。当血管瘤较大且合并危险因素时，建议酌情治疗。生长速度过快有可能引起疼痛还有憋闷感。建议于正规医院就诊完善检查及鉴别诊断。同时每隔3-6个月做B超检查，动态观察肿瘤变化。直径大于10cm或有发生外伤性破裂大出血的可能或肿瘤虽小，但有明显症状或不能排除肝癌的肝血管瘤可行手术切除。
肝血管瘤变大怎么办？	肝血管瘤作为一种良性肿瘤，大多无症状，且无恶变倾向，原则上以随访观察为主。这是目前国内外普遍接受的观念。肝血管瘤严重程度取决于肝血管瘤的生长速度和大小。当血管瘤较大且合并危险因素时，建议酌情治疗。生长速度过快有可能引起疼痛还有憋闷感。建议于正规医院就诊完善检查及鉴别诊断。同时每隔3-6个月做B超检查，动态观察肿瘤变化。直径大于10cm或有发生外伤性破裂大出血的可能或肿瘤虽小，但有明显症状或不能排除肝癌的肝血管瘤可行手术切除。
肝血管瘤会长大吗？	肝血管瘤作为一种良性肿瘤，大多无症状，且无恶变倾向，原则上以随访观察为主。这是目前国内外普遍接受的观念。肝血管瘤严重程度取决于肝血管瘤的生长速度和大小。当血管瘤较大且合并危险因素时，建议酌情治疗。生长速度过快有可能引起疼痛还有憋闷感。建议于正规医院就诊完善检查及鉴别诊断。同时每隔3-6个月做B超检查，动态观察肿瘤变化。直径大于10cm或有发生外伤性破裂大出血的可能或肿瘤虽小，但有明显症状或不能排除肝癌的肝血管瘤可行手术切除。
肝血管瘤会不断长大吗？？	肝血管瘤作为一种良性肿瘤，大多无症状，且无恶变倾向，原则上以随访观察为主。这是目前国内外普遍接受的观念。肝血管瘤严重程度取决于肝血管瘤的生长速度和大小。当血管瘤较大且合并危险因素时，建议酌情治疗。生长速度过快有可能引起疼痛还有憋闷感。建议于正规医院就诊完善检查及鉴别诊断。同时每隔3-6个月做B超检查，动态观察肿瘤变化。直径大于10cm或有发生外伤性破裂大出血的可能或肿瘤虽小，但有明显症状或不能排除肝癌的肝血管瘤可行手术切除。
肝血管瘤有没有危险，还会不会生长	肝血管瘤作为一种良性肿瘤，大多无症状，且无恶变倾向，原则上以随访观察为主。这是目前国内外普遍接受的观念。肝血管瘤严重程度取决于肝血管瘤的生长速度和大小。当血管瘤较大且合并危险因素时，建议酌情治疗。生长速度过快有可能引起疼痛还有憋闷感。建议于正规医院就诊完善检查及鉴别诊断。同时每隔3-6个月做B超检查，动态观察肿瘤变化。直径大于10cm或有发生外伤性破裂大出血的可能或肿瘤虽小，但有明显症状或不能排除肝癌的肝血管瘤可行手术切除。
肝血管瘤会自己破裂吗？	肝血管瘤是肝脏的良性肿瘤.小血管瘤多无症状,较大血管瘤可有肝区胀痛、破裂会引起肝脏出血！破裂的几率是随着瘤体的增大而增加的。如果血管瘤破裂处理不及时，是有可能出现腹腔的大出血而危及生命，可行手术治疗或加入肝动脉栓塞止血治疗，建议去正规医院就诊，及时对症治疗。
肝血管瘤如果破裂了会怎么样？	肝血管瘤是肝脏的良性肿瘤.小血管瘤多无症状,较大血管瘤可有肝区胀痛、破裂会引起肝脏出血！破裂的几率是随着瘤体的增大而增加的。如果血管瘤破裂处理不及时，是有可能出现腹腔的大出血而危及生命，可行手术治疗或加入肝动脉栓塞止血治疗，建议去正规医院就诊，及时对症治疗。
肝血管瘤会不会破裂的？	肝血管瘤是肝脏的良性肿瘤.小血管瘤多无症状,较大血管瘤可有肝区胀痛、破裂会引起肝脏出血！破裂的几率是随着瘤体的增大而增加的。如果血管瘤破裂处理不及时，是有可能出现腹腔的大出血而危及生命，可行手术治疗或加入肝动脉栓塞止血治疗，建议去正规医院就诊，及时对症治疗。
请问一下肝血管瘤会自然破裂吗？	肝血管瘤是肝脏的良性肿瘤.小血管瘤多无症状,较大血管瘤可有肝区胀痛、破裂会引起肝脏出血！破裂的几率是随着瘤体的增大而增加的。如果血管瘤破裂处理不及时，是有可能出现腹腔的大出血而危及生命，可行手术治疗或加入肝动脉栓塞止血治疗，建议去正规医院就诊，及时对症治疗。
肝血管瘤破裂怎么办？	肝血管瘤是肝脏的良性肿瘤.小血管瘤多无症状,较大血管瘤可有肝区胀痛、破裂会引起肝脏出血！破裂的几率是随着瘤体的增大而增加的。如果血管瘤破裂处理不及时，是有可能出现腹腔的大出血而危及生命，可行手术治疗或加入肝动脉栓塞止血治疗，建议去正规医院就诊，及时对症治疗。
肝脏血管瘤会影响肝功能么	肝血管瘤属肝脏良性病变，无明显恶变表现及倾向，少部分肝血管瘤的患者就容易出现突然快速生长的情况，就会出现各种不适症状和并发症。因为血管瘤体积过大压迫，可能会发生肝功能异常，建议就诊正规医院完善检查及鉴别诊断，及时对症治疗。
肝血管瘤会影响心脏功能吗	肝血管瘤属肝脏良性病变，无明显恶变表现及倾向，少部分肝血管瘤的患者就容易出现突然快速生长的情况，就会出现各种不适症状和并发症。因为血管瘤体积过大压迫，可能会发生心功能异常，建议就诊正规医院完善检查及鉴别诊断，及时对症治疗。
乙肝大三阳患者肝上有血管瘤怎么办，	肝血管瘤作为一种良性肿瘤，大多无症状，且无恶变倾向，原则上以随访观察为主。这是目前国内外普遍接受的观念。当血管瘤较大且合并危险因素时，建议酌情治疗。若合并乙型病毒性肝炎，建议定期复查，遵医嘱治疗乙型病毒性肝炎，同时完善CT、MRI等辅助检查，明确诊断，再决定进一步诊治方案。
肝血管瘤能彻底治愈吗？	肝血管瘤作为一种较为常见的肝良性肿瘤。手术切除治疗肝血管瘤是目前认为最为确切的治疗手段，但应严格把握切除指征，对于无症状，但强烈要求手术治疗的病人不推荐手术。瘤体小于10cm一般不需要手术，定期门诊随访观察；大于10cm的肝血管瘤一般需手术切除。此外，伴发症状或者出现严重并发症的肝血管瘤可以手术，如腹痛、临近器官受压、血小板异常消耗或肝功能受其影响。肝血管瘤生长速度明显的血管瘤也推荐手术治疗。青年女性患有巨大肝血管瘤也可手术切除，这是因为肝血管瘤具有在妊娠期瘤体生长增大的特点和分娩时可能破裂大出血引发生命危险。对从事剧烈活动的职业或爱好者，如足球、篮球、拳击等，可能招致肝外伤的巨大肝血管瘤患者，也可以考虑手术切除。
肝血管瘤晚期还能不能治愈吗	肝血管瘤作为一种较为常见的肝良性肿瘤。手术切除治疗肝血管瘤是目前认为最为确切的治疗手段，但应严格把握切除指征，对于无症状，但强烈要求手术治疗的病人不推荐手术。瘤体小于10cm一般不需要手术，定期门诊随访观察；大于10cm的肝血管瘤一般需手术切除。此外，伴发症状或者出现严重并发症的肝血管瘤可以手术，如腹痛、临近器官受压、血小板异常消耗或肝功能受其影响。肝血管瘤生长速度明显的血管瘤也推荐手术治疗。青年女性患有巨大肝血管瘤也可手术切除，这是因为肝血管瘤具有在妊娠期瘤体生长增大的特点和分娩时可能破裂大出血引发生命危险。对从事剧烈活动的职业或爱好者，如足球、篮球、拳击等，可能招致肝外伤的巨大肝血管瘤患者，也可以考虑手术切除。
肝血管瘤可以清除干净吗？	肝血管瘤作为一种较为常见的肝良性肿瘤。手术切除治疗肝血管瘤是目前认为最为确切的治疗手段，但应严格把握切除指征，对于无症状，但强烈要求手术治疗的病人不推荐手术。瘤体小于10cm一般不需要手术，定期门诊随访观察；大于10cm的肝血管瘤一般需手术切除。此外，伴发症状或者出现严重并发症的肝血管瘤可以手术，如腹痛、临近器官受压、血小板异常消耗或肝功能受其影响。肝血管瘤生长速度明显的血管瘤也推荐手术治疗。青年女性患有巨大肝血管瘤也可手术切除，这是因为肝血管瘤具有在妊娠期瘤体生长增大的特点和分娩时可能破裂大出血引发生命危险。对从事剧烈活动的职业或爱好者，如足球、篮球、拳击等，可能招致肝外伤的巨大肝血管瘤患者，也可以考虑手术切除。
肝血管瘤会变肝硬化吗？	引起肝硬化的病因很多，可分为病毒性肝炎肝硬化、酒精性肝硬化、代谢性肝硬化、胆汁淤积性肝硬化、肝静脉回流受阻性肝硬化、自身免疫性肝硬化、毒物和药物性肝硬化、营养不良性肝硬化、隐源性肝硬化等，肝血管瘤作为一种良性肿瘤，大多无症状，且无恶变倾向，若肝血管瘤体积较大影响到肝功能，可能会引发肝硬化。建议到正规医院就诊，查明肝硬化病因，酌情治疗。
肝血管瘤会长多大	肝海绵状血管瘤是最常见的肝良性肿瘤，疾病发展较慢，生长缓慢，预后良好，有的可以长到20cm，目前没有非手术方法控制其生长。患者需每隔3-6个月做B超检查，动态观察肿瘤变化。直径大于10cm或有发生外伤性破裂大出血的可能或肿瘤虽小，但有明显症状或不能排除肝癌的肝血管瘤可行手术切除。
肝血管瘤怎样控制不让它长大	肝海绵状血管瘤是最常见的肝良性肿瘤，疾病发展较慢，生长缓慢，预后良好，有的可以长到20cm，目前没有非手术方法控制其生长。患者需每隔3-6个月做B超检查，动态观察肿瘤变化。直径大于10cm或有发生外伤性破裂大出血的可能或肿瘤虽小，但有明显症状或不能排除肝癌的肝血管瘤可行手术切除。
肝血管瘤每年增长多少？	肝海绵状血管瘤是最常见的肝良性肿瘤，疾病发展较慢，生长缓慢，预后良好，有的可以长到20cm，目前没有非手术方法控制其生长。患者需每隔3-6个月做B超检查，动态观察肿瘤变化。直径大于10cm或有发生外伤性破裂大出血的可能或肿瘤虽小，但有明显症状或不能排除肝癌的肝血管瘤可行手术切除。
肝血管瘤一年会长大多少？	肝海绵状血管瘤是最常见的肝良性肿瘤，疾病发展较慢，生长缓慢，预后良好，有的可以长到20cm，目前没有非手术方法控制其生长。患者需每隔3-6个月做B超检查，动态观察肿瘤变化。直径大于10cm或有发生外伤性破裂大出血的可能或肿瘤虽小，但有明显症状或不能排除肝癌的肝血管瘤可行手术切除。
做肝血管瘤CT可以吃饭吗	肝血管瘤作为一种良性肿瘤，大多无症状，且无恶变倾向，原则上以随访观察为主。做CT检查前应注意空腹，检查结果才能尽可能准确。CT做完后可以正常饮食，若是强化CT，则应注意适量饮水，将造影剂尽快代谢完毕。
现在肝血管瘤能喝牛奶吗？	肝血管瘤作为一种良性肿瘤，大多无症状，且无恶变倾向，原则上以随访观察为主。这是目前国内外普遍接受的观念。当血管瘤较大且合并危险因素时，建议酌情治疗。肝血管瘤患者平时少食大油荤，不能长期伏案。肝血管瘤患者可以到正规医院中医科就诊，遵医嘱药物调养身体，提高身体素质。同时最好生活起居养成规律性，戒烟、戒酒、早睡、早起、饮食均匀等诸多的良好生活习惯。
患肝右叶血管瘤，在饮食方面要注意什么	肝血管瘤作为一种良性肿瘤，大多无症状，且无恶变倾向，原则上以随访观察为主。这是目前国内外普遍接受的观念。当血管瘤较大且合并危险因素时，建议酌情治疗。肝血管瘤患者平时少食大油荤，不能长期伏案。肝血管瘤患者可以到正规医院中医科就诊，遵医嘱药物调养身体，提高身体素质。同时最好生活起居养成规律性，戒烟、戒酒、早睡、早起、饮食均匀等诸多的良好生活习惯。
得了肝血管瘤在饮食上要注意哪些？	肝血管瘤作为一种良性肿瘤，大多无症状，且无恶变倾向，原则上以随访观察为主。这是目前国内外普遍接受的观念。当血管瘤较大且合并危险因素时，建议酌情治疗。肝血管瘤患者平时少食大油荤，不能长期伏案。肝血管瘤患者可以到正规医院中医科就诊，遵医嘱药物调养身体，提高身体素质。同时最好生活起居养成规律性，戒烟、戒酒、早睡、早起、饮食均匀等诸多的良好生活习惯。
得了肝血管瘤的人不可以吃什么食物	肝血管瘤作为一种良性肿瘤，大多无症状，且无恶变倾向，原则上以随访观察为主。这是目前国内外普遍接受的观念。当血管瘤较大且合并危险因素时，建议酌情治疗。肝血管瘤患者平时少食大油荤，不能长期伏案。肝血管瘤患者可以到正规医院中医科就诊，遵医嘱药物调养身体，提高身体素质。同时最好生活起居养成规律性，戒烟、戒酒、早睡、早起、饮食均匀等诸多的良好生活习惯。
肝血管瘤忌吃什么	肝血管瘤作为一种良性肿瘤，大多无症状，且无恶变倾向，原则上以随访观察为主。这是目前国内外普遍接受的观念。当血管瘤较大且合并危险因素时，建议酌情治疗。肝血管瘤患者平时少食大油荤，不能长期伏案。肝血管瘤患者可以到正规医院中医科就诊，遵医嘱药物调养身体，提高身体素质。同时最好生活起居养成规律性，戒烟、戒酒、早睡、早起、饮食均匀等诸多的良好生活习惯。
肝血管瘤饮食注意什么呢？	肝血管瘤作为一种良性肿瘤，大多无症状，且无恶变倾向，原则上以随访观察为主。这是目前国内外普遍接受的观念。当血管瘤较大且合并危险因素时，建议酌情治疗。肝血管瘤患者平时少食大油荤，不能长期伏案。肝血管瘤患者可以到正规医院中医科就诊，遵医嘱药物调养身体，提高身体素质。同时最好生活起居养成规律性，戒烟、戒酒、早睡、早起、饮食均匀等诸多的良好生活习惯。
肝血管瘤患者的饮食禁忌？	肝血管瘤作为一种良性肿瘤，大多无症状，且无恶变倾向，原则上以随访观察为主。这是目前国内外普遍接受的观念。当血管瘤较大且合并危险因素时，建议酌情治疗。肝血管瘤患者平时少食大油荤，不能长期伏案。肝血管瘤患者可以到正规医院中医科就诊，遵医嘱药物调养身体，提高身体素质。同时最好生活起居养成规律性，戒烟、戒酒、早睡、早起、饮食均匀等诸多的良好生活习惯。
肝血管瘤术后可以喝牛奶吗？	肝血管瘤作为一种良性肿瘤，大多无症状，且无恶变倾向，原则上以随访观察为主。这是目前国内外普遍接受的观念。当血管瘤较大且合并危险因素时，建议酌情治疗。肝血管瘤患者平时少食大油荤，不能长期伏案。肝血管瘤患者可以到正规医院中医科就诊，遵医嘱药物调养身体，提高身体素质。同时最好生活起居养成规律性，戒烟、戒酒、早睡、早起、饮食均匀等诸多的良好生活习惯。
肝上血管瘤患者可以喝牛奶，酸奶吗?	肝血管瘤作为一种良性肿瘤，大多无症状，且无恶变倾向，原则上以随访观察为主。这是目前国内外普遍接受的观念。当血管瘤较大且合并危险因素时，建议酌情治疗。肝血管瘤患者平时少食大油荤，不能长期伏案。肝血管瘤患者可以到正规医院中医科就诊，遵医嘱药物调养身体，提高身体素质。同时最好生活起居养成规律性，戒烟、戒酒、早睡、早起、饮食均匀等诸多的良好生活习惯。
肝血管瘤什么东西不能吃	肝血管瘤作为一种良性肿瘤，大多无症状，且无恶变倾向，原则上以随访观察为主。这是目前国内外普遍接受的观念。当血管瘤较大且合并危险因素时，建议酌情治疗。肝血管瘤患者平时少食大油荤，不能长期伏案。肝血管瘤患者可以到正规医院中医科就诊，遵医嘱药物调养身体，提高身体素质。同时最好生活起居养成规律性，戒烟、戒酒、早睡、早起、饮食均匀等诸多的良好生活习惯。
肝血管瘤患者饮食上要注意哪些事项呢？	肝血管瘤作为一种良性肿瘤，大多无症状，且无恶变倾向，原则上以随访观察为主。这是目前国内外普遍接受的观念。当血管瘤较大且合并危险因素时，建议酌情治疗。肝血管瘤患者平时少食大油荤，不能长期伏案。肝血管瘤患者可以到正规医院中医科就诊，遵医嘱药物调养身体，提高身体素质。同时最好生活起居养成规律性，戒烟、戒酒、早睡、早起、饮食均匀等诸多的良好生活习惯。
肝血管瘤患者不能喝酒了吗？	肝血管瘤作为一种良性肿瘤，大多无症状，且无恶变倾向，原则上以随访观察为主。这是目前国内外普遍接受的观念。当血管瘤较大且合并危险因素时，建议酌情治疗。肝血管瘤患者平时少食大油荤，不能长期伏案。肝血管瘤患者可以到正规医院中医科就诊，遵医嘱药物调养身体，提高身体素质。同时最好生活起居养成规律性，戒烟、戒酒、早睡、早起、饮食均匀等诸多的良好生活习惯。
肝血管瘤饮食方面应该注意什么？	肝血管瘤作为一种良性肿瘤，大多无症状，且无恶变倾向，原则上以随访观察为主。这是目前国内外普遍接受的观念。当血管瘤较大且合并危险因素时，建议酌情治疗。肝血管瘤患者平时少食大油荤，不能长期伏案。肝血管瘤患者可以到正规医院中医科就诊，遵医嘱药物调养身体，提高身体素质。同时最好生活起居养成规律性，戒烟、戒酒、早睡、早起、饮食均匀等诸多的良好生活习惯。
肝血管瘤饮食需要注意什么？	肝血管瘤作为一种良性肿瘤，大多无症状，且无恶变倾向，原则上以随访观察为主。这是目前国内外普遍接受的观念。当血管瘤较大且合并危险因素时，建议酌情治疗。肝血管瘤患者平时少食大油荤，不能长期伏案。肝血管瘤患者可以到正规医院中医科就诊，遵医嘱药物调养身体，提高身体素质。同时最好生活起居养成规律性，戒烟、戒酒、早睡、早起、饮食均匀等诸多的良好生活习惯。
肝血管瘤饮食注意事项？	肝血管瘤作为一种良性肿瘤，大多无症状，且无恶变倾向，原则上以随访观察为主。这是目前国内外普遍接受的观念。当血管瘤较大且合并危险因素时，建议酌情治疗。肝血管瘤患者平时少食大油荤，不能长期伏案。肝血管瘤患者可以到正规医院中医科就诊，遵医嘱药物调养身体，提高身体素质。同时最好生活起居养成规律性，戒烟、戒酒、早睡、早起、饮食均匀等诸多的良好生活习惯。
肝血管瘤可不可以吃韭菜	肝血管瘤作为一种良性肿瘤，大多无症状，且无恶变倾向，原则上以随访观察为主。这是目前国内外普遍接受的观念。当血管瘤较大且合并危险因素时，建议酌情治疗。肝血管瘤患者平时少食大油荤，不能长期伏案。肝血管瘤患者可以到正规医院中医科就诊，遵医嘱药物调养身体，提高身体素质。同时最好生活起居养成规律性，戒烟、戒酒、早睡、早起、饮食均匀等诸多的良好生活习惯。
肝血管瘤能吃菠菜吗？	肝血管瘤作为一种良性肿瘤，大多无症状，且无恶变倾向，原则上以随访观察为主。这是目前国内外普遍接受的观念。当血管瘤较大且合并危险因素时，建议酌情治疗。肝血管瘤患者平时少食大油荤，不能长期伏案。肝血管瘤患者可以到正规医院中医科就诊，遵医嘱药物调养身体，提高身体素质。同时最好生活起居养成规律性，戒烟、戒酒、早睡、早起、饮食均匀等诸多的良好生活习惯。
肝脏血管瘤可以吃鱼吗	肝血管瘤作为一种良性肿瘤，大多无症状，且无恶变倾向，原则上以随访观察为主。这是目前国内外普遍接受的观念。当血管瘤较大且合并危险因素时，建议酌情治疗。肝血管瘤患者平时少食大油荤，不能长期伏案。肝血管瘤患者可以到正规医院中医科就诊，遵医嘱药物调养身体，提高身体素质。同时最好生活起居养成规律性，戒烟、戒酒、早睡、早起、饮食均匀等诸多的良好生活习惯。
肝血管瘤不能吃哪些食物?	肝血管瘤作为一种良性肿瘤，大多无症状，且无恶变倾向，原则上以随访观察为主。这是目前国内外普遍接受的观念。当血管瘤较大且合并危险因素时，建议酌情治疗。肝血管瘤患者平时少食大油荤，不能长期伏案。肝血管瘤患者可以到正规医院中医科就诊，遵医嘱药物调养身体，提高身体素质。同时最好生活起居养成规律性，戒烟、戒酒、早睡、早起、饮食均匀等诸多的良好生活习惯。
肝血管瘤能吃牛肉吗？	肝血管瘤作为一种良性肿瘤，大多无症状，且无恶变倾向，原则上以随访观察为主。这是目前国内外普遍接受的观念。当血管瘤较大且合并危险因素时，建议酌情治疗。肝血管瘤患者平时少食大油荤，不能长期伏案。肝血管瘤患者可以到正规医院中医科就诊，遵医嘱药物调养身体，提高身体素质。同时最好生活起居养成规律性，戒烟、戒酒、早睡、早起、饮食均匀等诸多的良好生活习惯。
肝血管瘤多吃什么好？	肝血管瘤作为一种良性肿瘤，大多无症状，且无恶变倾向，原则上以随访观察为主。这是目前国内外普遍接受的观念。当血管瘤较大且合并危险因素时，建议酌情治疗。肝血管瘤患者平时少食大油荤，不能长期伏案。肝血管瘤患者可以到正规医院中医科就诊，遵医嘱药物调养身体，提高身体素质。同时最好生活起居养成规律性，戒烟、戒酒、早睡、早起、饮食均匀等诸多的良好生活习惯。
肝血管瘤可不可以吃鱼	肝血管瘤作为一种良性肿瘤，大多无症状，且无恶变倾向，原则上以随访观察为主。这是目前国内外普遍接受的观念。当血管瘤较大且合并危险因素时，建议酌情治疗。肝血管瘤患者平时少食大油荤，不能长期伏案。肝血管瘤患者可以到正规医院中医科就诊，遵医嘱药物调养身体，提高身体素质。同时最好生活起居养成规律性，戒烟、戒酒、早睡、早起、饮食均匀等诸多的良好生活习惯。
肝血管瘤能不能喝黄酒？	肝血管瘤作为一种良性肿瘤，大多无症状，且无恶变倾向，原则上以随访观察为主。这是目前国内外普遍接受的观念。当血管瘤较大且合并危险因素时，建议酌情治疗。肝血管瘤患者平时少食大油荤，不能长期伏案。肝血管瘤患者可以到正规医院中医科就诊，遵医嘱药物调养身体，提高身体素质。同时最好生活起居养成规律性，戒烟、戒酒、早睡、早起、饮食均匀等诸多的良好生活习惯。
肝上血管瘤可以吃糖吗	肝血管瘤作为一种良性肿瘤，大多无症状，且无恶变倾向，原则上以随访观察为主。这是目前国内外普遍接受的观念。当血管瘤较大且合并危险因素时，建议酌情治疗。肝血管瘤患者平时少食大油荤，不能长期伏案。肝血管瘤患者可以到正规医院中医科就诊，遵医嘱药物调养身体，提高身体素质。同时最好生活起居养成规律性，戒烟、戒酒、早睡、早起、饮食均匀等诸多的良好生活习惯。
肝血管瘤可以吃大蒜吗	肝血管瘤作为一种良性肿瘤，大多无症状，且无恶变倾向，原则上以随访观察为主。这是目前国内外普遍接受的观念。当血管瘤较大且合并危险因素时，建议酌情治疗。肝血管瘤患者平时少食大油荤，不能长期伏案。肝血管瘤患者可以到正规医院中医科就诊，遵医嘱药物调养身体，提高身体素质。同时最好生活起居养成规律性，戒烟、戒酒、早睡、早起、饮食均匀等诸多的良好生活习惯。
有肝血管瘤能吃蜂蜜吗	肝血管瘤作为一种良性肿瘤，大多无症状，且无恶变倾向，原则上以随访观察为主。这是目前国内外普遍接受的观念。当血管瘤较大且合并危险因素时，建议酌情治疗。肝血管瘤患者平时少食大油荤，不能长期伏案。肝血管瘤患者可以到正规医院中医科就诊，遵医嘱药物调养身体，提高身体素质。同时最好生活起居养成规律性，戒烟、戒酒、早睡、早起、饮食均匀等诸多的良好生活习惯。
肝血管瘤患者能经常吃羊肉吗？	肝血管瘤作为一种良性肿瘤，大多无症状，且无恶变倾向，原则上以随访观察为主。这是目前国内外普遍接受的观念。当血管瘤较大且合并危险因素时，建议酌情治疗。肝血管瘤患者平时少食大油荤，不能长期伏案。肝血管瘤患者可以到正规医院中医科就诊，遵医嘱药物调养身体，提高身体素质。同时最好生活起居养成规律性，戒烟、戒酒、早睡、早起、饮食均匀等诸多的良好生活习惯。
肝血管瘤患者可以喝少量红酒	肝血管瘤作为一种良性肿瘤，大多无症状，且无恶变倾向，原则上以随访观察为主。这是目前国内外普遍接受的观念。当血管瘤较大且合并危险因素时，建议酌情治疗。肝血管瘤患者平时少食大油荤，不能长期伏案。肝血管瘤患者可以到正规医院中医科就诊，遵医嘱药物调养身体，提高身体素质。同时最好生活起居养成规律性，戒烟、戒酒、早睡、早起、饮食均匀等诸多的良好生活习惯。
我肝上长个血管瘤可以吃三七粉吗	肝血管瘤作为一种良性肿瘤，大多无症状，且无恶变倾向，原则上以随访观察为主。这是目前国内外普遍接受的观念。当血管瘤较大且合并危险因素时，建议酌情治疗。肝血管瘤患者平时少食大油荤，不能长期伏案。肝血管瘤患者可以到正规医院中医科就诊，遵医嘱药物调养身体，提高身体素质。同时最好生活起居养成规律性，戒烟、戒酒、早睡、早起、饮食均匀等诸多的良好生活习惯。
肝血管瘤喝什么茶	肝血管瘤作为一种良性肿瘤，大多无症状，且无恶变倾向，原则上以随访观察为主。这是目前国内外普遍接受的观念。当血管瘤较大且合并危险因素时，建议酌情治疗。肝血管瘤患者平时少食大油荤，不能长期伏案。肝血管瘤患者可以到正规医院中医科就诊，遵医嘱药物调养身体，提高身体素质。同时最好生活起居养成规律性，戒烟、戒酒、早睡、早起、饮食均匀等诸多的良好生活习惯。
肝血管瘤可以吃阿胶糕吗？	肝血管瘤作为一种良性肿瘤，大多无症状，且无恶变倾向，原则上以随访观察为主。这是目前国内外普遍接受的观念。当血管瘤较大且合并危险因素时，建议酌情治疗。肝血管瘤患者平时少食大油荤，不能长期伏案。肝血管瘤患者可以到正规医院中医科就诊，遵医嘱药物调养身体，提高身体素质。同时最好生活起居养成规律性，戒烟、戒酒、早睡、早起、饮食均匀等诸多的良好生活习惯。
肝血管瘤可不可以吃人参	肝血管瘤作为一种良性肿瘤，大多无症状，且无恶变倾向，原则上以随访观察为主。这是目前国内外普遍接受的观念。当血管瘤较大且合并危险因素时，建议酌情治疗。肝血管瘤患者平时少食大油荤，不能长期伏案。肝血管瘤患者可以到正规医院中医科就诊，遵医嘱药物调养身体，提高身体素质。同时最好生活起居养成规律性，戒烟、戒酒、早睡、早起、饮食均匀等诸多的良好生活习惯。
肝血管瘤可不可以吃灵芝孢子粉	肝血管瘤作为一种良性肿瘤，大多无症状，且无恶变倾向，原则上以随访观察为主。这是目前国内外普遍接受的观念。当血管瘤较大且合并危险因素时，建议酌情治疗。肝血管瘤患者平时少食大油荤，不能长期伏案。肝血管瘤患者可以到正规医院中医科就诊，遵医嘱药物调养身体，提高身体素质。同时最好生活起居养成规律性，戒烟、戒酒、早睡、早起、饮食均匀等诸多的良好生活习惯。
肝血管瘤可以吃西洋参吗？	肝血管瘤作为一种良性肿瘤，大多无症状，且无恶变倾向，原则上以随访观察为主。这是目前国内外普遍接受的观念。当血管瘤较大且合并危险因素时，建议酌情治疗。肝血管瘤患者平时少食大油荤，不能长期伏案。肝血管瘤患者可以到正规医院中医科就诊，遵医嘱药物调养身体，提高身体素质。同时最好生活起居养成规律性，戒烟、戒酒、早睡、早起、饮食均匀等诸多的良好生活习惯。
肝脏血管瘤能吃孢子粉吗？	肝血管瘤作为一种良性肿瘤，大多无症状，且无恶变倾向，原则上以随访观察为主。这是目前国内外普遍接受的观念。当血管瘤较大且合并危险因素时，建议酌情治疗。肝血管瘤患者平时少食大油荤，不能长期伏案。肝血管瘤患者可以到正规医院中医科就诊，遵医嘱药物调养身体，提高身体素质。同时最好生活起居养成规律性，戒烟、戒酒、早睡、早起、饮食均匀等诸多的良好生活习惯。
肝血管瘤可以吃红糖吗？	肝血管瘤作为一种良性肿瘤，大多无症状，且无恶变倾向，原则上以随访观察为主。这是目前国内外普遍接受的观念。当血管瘤较大且合并危险因素时，建议酌情治疗。肝血管瘤患者平时少食大油荤，不能长期伏案。肝血管瘤患者可以到正规医院中医科就诊，遵医嘱药物调养身体，提高身体素质。同时最好生活起居养成规律性，戒烟、戒酒、早睡、早起、饮食均匀等诸多的良好生活习惯。
肝血管瘤可以多吃补血食物么	肝血管瘤作为一种良性肿瘤，大多无症状，且无恶变倾向，原则上以随访观察为主。这是目前国内外普遍接受的观念。当血管瘤较大且合并危险因素时，建议酌情治疗。肝血管瘤患者平时少食大油荤，不能长期伏案。肝血管瘤患者可以到正规医院中医科就诊，遵医嘱药物调养身体，提高身体素质。同时最好生活起居养成规律性，戒烟、戒酒、早睡、早起、饮食均匀等诸多的良好生活习惯。
肝血管瘤可不可以吃红枣和枸杞	肝血管瘤作为一种良性肿瘤，大多无症状，且无恶变倾向，原则上以随访观察为主。这是目前国内外普遍接受的观念。当血管瘤较大且合并危险因素时，建议酌情治疗。肝血管瘤患者平时少食大油荤，不能长期伏案。肝血管瘤患者可以到正规医院中医科就诊，遵医嘱药物调养身体，提高身体素质。同时最好生活起居养成规律性，戒烟、戒酒、早睡、早起、饮食均匀等诸多的良好生活习惯。
肝血管瘤可不可以吃红枣	肝血管瘤作为一种良性肿瘤，大多无症状，且无恶变倾向，原则上以随访观察为主。这是目前国内外普遍接受的观念。当血管瘤较大且合并危险因素时，建议酌情治疗。肝血管瘤患者平时少食大油荤，不能长期伏案。肝血管瘤患者可以到正规医院中医科就诊，遵医嘱药物调养身体，提高身体素质。同时最好生活起居养成规律性，戒烟、戒酒、早睡、早起、饮食均匀等诸多的良好生活习惯。
肝血管瘤能不能吃阿胶	肝血管瘤作为一种良性肿瘤，大多无症状，且无恶变倾向，原则上以随访观察为主。这是目前国内外普遍接受的观念。当血管瘤较大且合并危险因素时，建议酌情治疗。肝血管瘤患者平时少食大油荤，不能长期伏案。肝血管瘤患者可以到正规医院中医科就诊，遵医嘱药物调养身体，提高身体素质。同时最好生活起居养成规律性，戒烟、戒酒、早睡、早起、饮食均匀等诸多的良好生活习惯。
肝血管瘤喝蒲公英好吗？	肝血管瘤作为一种良性肿瘤，大多无症状，且无恶变倾向，原则上以随访观察为主。这是目前国内外普遍接受的观念。当血管瘤较大且合并危险因素时，建议酌情治疗。肝血管瘤患者平时少食大油荤，不能长期伏案。肝血管瘤患者可以到正规医院中医科就诊，遵医嘱药物调养身体，提高身体素质。同时最好生活起居养成规律性，戒烟、戒酒、早睡、早起、饮食均匀等诸多的良好生活习惯。
肝血管瘤手术后吃什么食物好？	肝血管瘤作为一种较为常见的肝良性肿瘤。手术切除治疗肝血管瘤是目前认为最为确切的治疗手段，术后应逐渐从肠外营养过度到肠内营养，一般2到3天后可予流食、半流食然后逐渐恢复至正常饮食。注意饮食要营养丰富，搭配合理，多吃蔬菜水果。饮食要易消化，不要吃生冷硬辛辣刺激性食物。千万不能喝酒，不要吃太多的辛辣刺激的食物。肝血管瘤患者平时少食大油荤，不能长期伏案。肝血管瘤患者最好生活起居养成规律性，早睡、早起、饮食均匀，等诸多的良好生活习惯。
肝血管瘤手术后饮食要注意什么	肝血管瘤作为一种较为常见的肝良性肿瘤。手术切除治疗肝血管瘤是目前认为最为确切的治疗手段，术后应逐渐从肠外营养过度到肠内营养，一般2到3天后可予流食、半流食然后逐渐恢复至正常饮食。注意饮食要营养丰富，搭配合理，多吃蔬菜水果。饮食要易消化，不要吃生冷硬辛辣刺激性食物。千万不能喝酒，不要吃太多的辛辣刺激的食物。肝血管瘤患者平时少食大油荤，不能长期伏案。肝血管瘤患者最好生活起居养成规律性，早睡、早起、饮食均匀，等诸多的良好生活习惯。
肝血管瘤手术后要吃什么？	肝血管瘤作为一种较为常见的肝良性肿瘤。手术切除治疗肝血管瘤是目前认为最为确切的治疗手段，术后应逐渐从肠外营养过度到肠内营养，一般2到3天后可予流食、半流食然后逐渐恢复至正常饮食。注意饮食要营养丰富，搭配合理，多吃蔬菜水果。饮食要易消化，不要吃生冷硬辛辣刺激性食物。千万不能喝酒，不要吃太多的辛辣刺激的食物。肝血管瘤患者平时少食大油荤，不能长期伏案。肝血管瘤患者最好生活起居养成规律性，早睡、早起、饮食均匀，等诸多的良好生活习惯。
肝血管瘤手术后可以吃什么营养品啊？	肝血管瘤作为一种较为常见的肝良性肿瘤。手术切除治疗肝血管瘤是目前认为最为确切的治疗手段，术后应逐渐从肠外营养过度到肠内营养，一般2到3天后可予流食、半流食然后逐渐恢复至正常饮食。注意饮食要营养丰富，搭配合理，多吃蔬菜水果。饮食要易消化，不要吃生冷硬辛辣刺激性食物。千万不能喝酒，不要吃太多的辛辣刺激的食物。肝血管瘤患者平时少食大油荤，不能长期伏案。肝血管瘤患者最好生活起居养成规律性，早睡、早起、饮食均匀，等诸多的良好生活习惯。
肝血管瘤手术后哪些食物不能吃？	肝血管瘤作为一种较为常见的肝良性肿瘤。手术切除治疗肝血管瘤是目前认为最为确切的治疗手段，术后应逐渐从肠外营养过度到肠内营养，一般2到3天后可予流食、半流食然后逐渐恢复至正常饮食。注意饮食要营养丰富，搭配合理，多吃蔬菜水果。饮食要易消化，不要吃生冷硬辛辣刺激性食物。千万不能喝酒，不要吃太多的辛辣刺激的食物。肝血管瘤患者平时少食大油荤，不能长期伏案。肝血管瘤患者最好生活起居养成规律性，早睡、早起、饮食均匀，等诸多的良好生活习惯。
肝血管瘤手术后能吃什么水果	肝血管瘤作为一种较为常见的肝良性肿瘤。手术切除治疗肝血管瘤是目前认为最为确切的治疗手段，术后应逐渐从肠外营养过度到肠内营养，一般2到3天后可予流食、半流食然后逐渐恢复至正常饮食。注意饮食要营养丰富，搭配合理，多吃蔬菜水果。饮食要易消化，不要吃生冷硬辛辣刺激性食物。千万不能喝酒，不要吃太多的辛辣刺激的食物。肝血管瘤患者平时少食大油荤，不能长期伏案。肝血管瘤患者最好生活起居养成规律性，早睡、早起、饮食均匀，等诸多的良好生活习惯。
肝血管瘤手术后吃什么水果好？	肝血管瘤作为一种较为常见的肝良性肿瘤。手术切除治疗肝血管瘤是目前认为最为确切的治疗手段，术后应逐渐从肠外营养过度到肠内营养，一般2到3天后可予流食、半流食然后逐渐恢复至正常饮食。注意饮食要营养丰富，搭配合理，多吃蔬菜水果。饮食要易消化，不要吃生冷硬辛辣刺激性食物。千万不能喝酒，不要吃太多的辛辣刺激的食物。肝血管瘤患者平时少食大油荤，不能长期伏案。肝血管瘤患者最好生活起居养成规律性，早睡、早起、饮食均匀，等诸多的良好生活习惯。
肝血管瘤手术以后的饮食是要注意什么	肝血管瘤作为一种较为常见的肝良性肿瘤。手术切除治疗肝血管瘤是目前认为最为确切的治疗手段，术后应逐渐从肠外营养过度到肠内营养，一般2到3天后可予流食、半流食然后逐渐恢复至正常饮食。注意饮食要营养丰富，搭配合理，多吃蔬菜水果。饮食要易消化，不要吃生冷硬辛辣刺激性食物。千万不能喝酒，不要吃太多的辛辣刺激的食物。肝血管瘤患者平时少食大油荤，不能长期伏案。肝血管瘤患者最好生活起居养成规律性，早睡、早起、饮食均匀，等诸多的良好生活习惯。
肝血管瘤介入手术后吃什么好？	肝动脉介入栓塞术具有创伤小、花费少、术后恢复快等优点，近期疗效比较确切，但远期复发率相对较高。肝动脉介入栓塞术也可能造成异位栓塞导致各种并发症的发生。术后需注意手术切口处保护，避免出现剧烈运动，撞击等可能引起并发症的风险。要鼓励患者尽早进食，尤其是饮水，开始的时候可先进食低盐、低脂、富含维生素、易于消化饮食，逐步过度到正常饮食，多吃新鲜蔬菜和水果，保持大便通畅。
做了肝血管瘤介入手术后，如何保养，特别在饮食方面	肝动脉介入栓塞术具有创伤小、花费少、术后恢复快等优点，近期疗效比较确切，但远期复发率相对较高。肝动脉介入栓塞术也可能造成异位栓塞导致各种并发症的发生。术后需注意手术切口处保护，避免出现剧烈运动，撞击等可能引起并发症的风险。要鼓励患者尽早进食，尤其是饮水，开始的时候可先进食低盐、低脂、富含维生素、易于消化饮食，逐步过度到正常饮食，多吃新鲜蔬菜和水果，保持大便通畅。术后定期复查病情变化，及时对症治疗
肝血管瘤和肾囊肿能不能喝蒲公英泡水！能不能喝蜂蜜水	肝血管瘤作为一种良性肿瘤，大多无症状，且无恶变倾向，原则上以随访观察为主。这是目前国内外普遍接受的观念。当血管瘤较大且合并危险因素时，建议酌情治疗。肾囊肿一般是后天形成，单纯肾囊肿一般来源于肾小管憩室。单纯性肾囊肿多无症状，对肾功能和周围组织影响不大，因此不需治疗，只要6个月到1年随诊。如果囊肿直径较大，超过5cm或产生周围组织压迫症状，引起尿路梗阻，则需要行囊液抽吸术并囊内注射硬化剂。如果囊肿巨大，直径超过10cm则可能需要手术治疗。目前没有证据证明蒲公英与蜂蜜水对肝血管瘤和肾囊肿有治疗效果，也没有明显禁忌症，可以正常饮用。
肝癌外科治疗	答案
肝癌能根治吗？	肝癌的预后取决于患者肿瘤分期，患者基本情况及综合治疗效果，手术切除及消融术可以消灭肉眼可见的肿瘤，但可能存在肿瘤细胞残留或微小转移，因此术后均存在复发可能
肝癌是不治之症吗？	肝癌的预后取决于患者肿瘤分期，基本情况及综合治疗效果，对于恶性程度低，基本情况较好，以及综合治疗取得很好效果患者，通常预后较好，生存时间较长，建议尽早到医院进行多学科联合诊治，制定个体化治疗方案，从而获得较好的治疗效果
多发肝癌无法手术怎么办？	肝癌可以通过多种方式治疗，常见非手术切除的治疗方式有：肝切除，肝移植，射频等消融术，经动脉化疗栓塞，放疗，全身化疗及分子靶向治疗，治疗方式选择取决于患者肿瘤分期、肝功能情况、当地医疗条件等多种因素，建议到医院专科进行评估，多学科联合治疗
肝癌用粒子治疗可以吗？	放疗是肝癌的一种治疗方法之一，拥有毒性低，副作用相对较小等优势，同时存在治疗费用高，限制较多，肿瘤坏死效果不佳等不足，因此建议对于肝癌进行多学科联合会诊，制定个体化治疗方案，从而达到良好的治疗效果
肝脂肪瘤5cm做手术能做微创吗？	手术方式选择取决于患者的肿瘤情况，患者一般情况以及医师医疗机构基本情况等多个因素，如患者肿瘤情况差，医疗机构缺乏微创手术经验，则不建议行微创方式。建议到医院进行评估，从而制定合适的手术方式，通常情况下微创手术创伤相对较小，术后恢复相对较快
肝肿瘤10公分能切除吗？	能否进行手术取决于肿瘤的大小、数目、生长部位，有无远处转移，患者肝功能和有无重大基础疾病等多个方面，肿瘤情况决定患者手术是否获益，患者基本情况决定患者手术风险，建议到医院专科进行综合检查评估诊治，通常肿瘤越大，其手术切除难度越大，手术风险越高
肝癌早期治疗方法	肝癌首选治疗是手术切除，通过对肝脏肿瘤切除达到治疗效果，对于不符合切除术的患者，可以选择非手术消融方法和全身治疗，治疗的选择取决于患者基础肝病的严重程度、肝内肿瘤的大小和分布、血供情况以及患者总体体能，肝癌的治疗需要多学科联合诊治，建议进行多学科会诊，制定个体化治疗方案
肝癌早期可以治疗好吗?	肝癌首选治疗是手术切除，通过对肝脏肿瘤切除达到治疗效果，对于不符合切除术的患者，可以选择非手术消融方法和全身治疗，治疗的选择取决于患者基础肝病的严重程度、肝内肿瘤的大小和分布、血供情况以及患者总体体能，肝癌的治疗需要多学科联合诊治，建议进行多学科会诊，制定个体化治疗方案
同时患上肝癌和肺癌能手术吗?	首先建议到肝胆外科和胸外科就诊，联合会诊明确病因，判断肿瘤来源，不同来源的肿瘤其治疗方式也不同，如果是肝癌肺转移一般不进行根治性手术治疗，可以考虑非手术消融方法和全身治疗等方法，建议多学科会诊，制定个体化治疗方案
恶性肝肿瘤切除有用吗？	对于可切除肝癌首选治疗是手术治疗，通过手术切除含癌部分进行治疗，其治疗效果取决于多个方面，如肿瘤的大小、分期、肝功能等基本情况、手术是否顺利、是否应用辅助治疗等多个方面
肝脏12厘米大的肿瘤还能做手术吗？	能否进行手术取决于肿瘤的大小、数目、生长部位，有无远处转移，患者肝功能和有无重大基础疾病等多个方面，肿瘤情况决定患者手术是否获益，患者基本情况决定患者手术风险，建议到医院专科进行综合检查评估诊治
肝癌晚期还能做手术么	能否进行手术取决于肿瘤的大小、数目、生长部位，有无远处转移，患者肝功能和有无重大基础疾病等多个方面，肿瘤情况决定患者手术是否获益，患者基本情况决定患者手术风险，建议到医院专科进行综合检查评估诊治
肝癌晚期可以换肝吗?	肝癌能否行肝移植术需要医师评估，原位肝移植适用于不耐受肝切除术、孤立肿瘤直径≤5cm或不超过3个单独病变且直径均不超过3cm、无肉眼可见血管侵犯证据、且无淋巴结或远处转移的患者。建议到医院进行评估，判断是否拥有肝移植指征
肝癌是做移植好还是切除好？	肝癌首选治疗是手术切除，通过对肝脏肿瘤切除达到治疗效果，原位肝移植适用于不耐受肝切除术、孤立肿瘤直径≤5cm或不超过3个单独病变且直径均不超过3cm、无肉眼可见血管侵犯证据、且无淋巴结或远处转移的患者，同时能否实行肝移植还取决于是否有合适的肝源，肝源获取难度往往较大
我爸爸得了肝癌,已经晚期,请问能换肝脏吗?	肝癌能否行肝移植术需要医师评估，原位肝移植适用于不耐受肝切除术、孤立肿瘤直径≤5cm或不超过3个单独病变且直径均不超过3cm、无肉眼可见血管侵犯证据、且无淋巴结或远处转移的患者。建议到医院进行评估，判断是否拥有肝移植指征
我妈妈肝右后叶有个血管瘤需要切除吗？	肝血管瘤手术指征：1.血管瘤直径＞10cm；2.肿瘤直径5-10cm，但有外伤破裂大出血可能；3.肿瘤直径3-5cm，有明显症状，或不能除外肝癌；对于肿瘤直径小，无明显症状的肝血管瘤，暂不需要手术，每隔3-8个月行超声或其他影像学检查复查即可，建议到医院进行诊治，判断肿瘤生长情况，是否拥有手术指征
肝癌切除手术一般做几个小时？	手术时间取决于患者肝癌情况，手术方式，术者及麻醉恢复情况等因素，通常4-8小时，如果有肿瘤恶性程度高，肿瘤所在部位切除困难，术中需要冰冻病理检查，肿瘤需要扩大切除等情况，手术时间会延长
肝癌切割手术能根治或会加深病情吗	肝癌首选手术切除，手术效果取决于患者肿瘤情况及肝功能等基础情况，肿瘤的完整切除是治疗肿瘤的有效措施，但是手术之后有复发风险；如果患者肝功能较差，基础疾病多，肝癌切除术后可能会出现相应并发症，如出血，肝功能衰竭等症状，严重时可能危及生命
肝癌晚期肿瘤12cm能切除吗？	能否进行手术取决于肿瘤的大小、数目、生长部位，有无远处转移，患者肝功能和有无重大基础疾病等多个方面，肿瘤情况决定患者手术是否获益，患者基本情况决定患者手术风险，建议到医院专科进行综合检查评估诊治
肝癌晚期做肝移植成功率有多少能活多长	肝癌能否行肝移植术需要医师评估，原位肝移植适用于不耐受肝切除术、孤立肿瘤直径≤5cm或不超过3个单独病变且直径均不超过3cm、无肉眼可见血管侵犯证据、且无淋巴结或远处转移的患者。建议到医院进行评估，判断是否拥有肝移植指征
复发肝癌再次手术可以微创吗	对于二次手术，能否行微创方式取决于患者的肿瘤情况，腹部粘连情况以及医师医疗机构基本情况等多个因素，如腹腔粘连较重，肿瘤位置差，医师缺乏微创下行二次手术的经验，则不建议行微创方式。建议到医院进行评估，从而制定合适的手术方式
肝癌手术副作用很大吗	满足肝癌手术切除指征并且没有明确手术禁忌的患者经过良好的术前准备，手术后并发症发病率及死亡率整体较低，手术发病率和死亡率也与医师及医疗机构水平有关
肝癌一定要切除脾吗？	不一定，肝癌是否行脾切除术取决于患者的自身情况，一部分肝癌患者伴有门静脉高压及脾功能亢进，因此需要脾脏切除，如果单纯肝癌，无脾功能亢进，往往不需要脾脏切除，建议到医院进行就诊，明确有无脾脏切除指征
肝癌早期的治疗方法	肝癌首选治疗是手术切除，通过对肝脏肿瘤切除达到治疗效果，对于不符合切除术的患者，可以选择非手术消融方法和全身治疗，治疗的选择取决于患者基础肝病的严重程度、肝内肿瘤的大小和分布、血供情况以及患者总体体能，肝癌的治疗需要多学科联合诊治，建议进行多学科会诊，制定个体化治疗方案
晚期肝癌可以换肝吗？	肝癌能否行肝移植术需要医师评估，原位肝移植适用于不耐受肝切除术、孤立肿瘤直径≤5cm或不超过3个单独病变且直径均不超过3cm、无肉眼可见血管侵犯证据、且无淋巴结或远处转移的患者。建议到医院进行评估，判断是否拥有肝移植指征
肝癌有奇迹吗？	肝癌的预后取决于患者肿瘤分期，基本情况及综合治疗效果，对于恶性程度低，基本情况较好，以及综合治疗取得很好效果患者，通常预后较好，生存时间较长，建议尽早到医院进行多学科联合诊治，制定个体化治疗方案，从而获得较好的治疗效果
肝脏癌变了，能做移植吗	肝癌能否行肝移植术需要医师评估，原位肝移植适用于不耐受肝切除术、孤立肿瘤直径≤5cm或不超过3个单独病变且直径均不超过3cm、无肉眼可见血管侵犯证据、且无淋巴结或远处转移的患者。建议到医院进行评估，判断是否拥有肝移植指征
高龄老人得了肝癌怎么办？	肝癌首选治疗是手术切除，通过对肝脏肿瘤切除达到治疗效果，对于不符合切除术的患者，可以选择非手术消融方法和全身治疗，治疗的选择取决于患者基础肝病的严重程度、肝内肿瘤的大小和分布、血供情况以及患者总体体能，肝癌的治疗需要多学科联合诊治，建议进行多学科会诊，制定个体化治疗方案，老龄患者往往伴有基础疾病，术后恢复较慢，因此手术风险往往较高，术后出现并发症和死亡的概率相对较大
肝癌晚期并门静脉癌栓能做肝移植么？	肝癌能否行肝移植术需要医师评估，原位肝移植适用于不耐受肝切除术、孤立肿瘤直径≤5cm或不超过3个单独病变且直径均不超过3cm、无肉眼可见血管侵犯证据、且无淋巴结或远处转移的患者。建议到医院进行评估，判断是否拥有肝移植指征
肝癌晚期不能手术还能有别的治疗方法吗？	肝癌可以通过多种方式治疗，常见非手术切除的治疗方式有：肝切除，肝移植，射频等消融术，经动脉化疗栓塞，放疗，全身化疗及分子靶向治疗，治疗方式选择取决于患者肿瘤分期、肝功能情况、当地医疗条件等多种因素，建议到医院专科进行评估，多学科联合治疗
肝癌术后为何会复发	与以下因素有关：1.肝癌切除术只能够切除肉眼可见的肿瘤，可能会有肿瘤细胞残留；2.肿瘤恶性程度高，发生无法观察到的转移；3.肝癌合并肝硬化，肝硬化易导致肝癌复发
肝癌怎么控制不扩散	对于肿瘤分化好，病灶单一，没有远处转移的患者，肝切除术后联合化疗、放疗、靶向治疗等多种治疗方式可以控制肿瘤复发及扩散，对于肿瘤分化差，有多个病灶，或者发现有多处转移的患者，多种治疗方式联合可能控制肿瘤扩散，但效果相对较差
老年人肝癌可以手术治疗吗？	能否进行手术取决于肿瘤的大小、数目、生长部位，有无远处转移，患者肝功能和有无重大基础疾病等多个方面，肿瘤情况决定患者手术是否获益，患者基本情况决定患者手术风险，建议到医院专科进行综合检查评估诊治，通常年龄越大，其手术风险难度越大，手术风险越高，术后恢复越慢
肝癌能不能切除肝？	肝癌可采取手术切除含癌部分进行治疗，手术往往切除肿瘤及部分肝脏，获得一个相对无瘤的切缘，以减少术后复发风险
肝癌能手术吗,如能切除一部分肝,还能长出来吗??	肝癌首选治疗是手术切除，肝脏再生能力很强，肝脏再生能力受肝脏功能，年龄，残余肝体积，黄疸等多种因素影响，通常情况下对于肝功能良好，拥有足够剩余肝体积，一般情况较好的患者，肝脏可以再生恢复
肝癌可以切除吗	能否进行手术取决于肿瘤的大小、数目、生长部位，有无远处转移，患者肝功能和有无重大基础疾病等多个方面，肿瘤情况决定患者手术是否获益，患者基本情况决定患者手术风险，建议到医院专科进行综合检查评估诊治
肝癌是开刀好还是介入好？	肝癌首选治疗是手术切除，通过对肝脏肿瘤切除达到治疗效果，对于不符合切除术的患者，可以选择非手术消融方法和全身治疗，治疗的选择取决于患者基础肝病的严重程度、肝内肿瘤的大小和分布、血供情况以及患者总体体能，肝癌的治疗需要多学科联合诊治，建议进行多学科会诊，制定个体化治疗方案
肝癌可以针灸吗？	肝癌的常规治疗有手术治疗，介入治疗等方式，中医治疗不是肝癌常规治疗手段，中医可以提高机体抗病能力，改善全身症状，减轻化疗放疗不良反应，可以到大医院相关专业咨询
肝癌哪种治疗方法最好	肝癌首选治疗是手术切除，通过对肝脏肿瘤切除达到治疗效果，对于不符合切除术的患者，可以选择非手术消融方法和全身治疗，治疗的选择取决于患者基础肝病的严重程度、肝内肿瘤的大小和分布、血供情况以及患者总体体能，肝癌的治疗需要多学科联合诊治，建议进行多学科会诊，制定个体化治疗方案
肝癌切除一部分肝脏有危险吗？	肝脏再生能力很强，对于生命体征平稳，基础肝功能好的患者，部分肝切除一般不会有太大影响，如肝切除术切除大量肝组织或患者肝功能较差，剩余肝脏不能维持正常机体运转，会出现肝衰竭等情况，严重时可以危及生命
肝癌可以治疗好吗？	肝癌的预后取决于患者肿瘤分期，患者基本情况及综合治疗效果，手术切除及消融术可以消灭肉眼可见的肿瘤，但可能存在肿瘤细胞残留或微小转移，因此术后均存在复发可能
患有肝癌的人做手术有危险吗？	肝肿瘤切除是大手术，肝脏解剖结构复杂，拥有丰富血管，因此手术出血往往较多，对于肝癌患者，手术切除部位可能涉及到多个肝段，多脏器切除，术后可能出现严重并发症甚至死亡，因此手术风险较高，同时手术风险还取决于患者年龄，身体状况，肝功能状况，肿瘤情况等多个因素，建议在拥有丰富手术经验的医师及相关诊疗经验的医疗机构中进行
肝癌晚期要是做手术的话，能有多大把握啊？	肝癌首选治疗是手术切除，通过对肝脏肿瘤切除达到治疗效果，对于满足肝癌手术切除指征并且没有明确手术禁忌的患者经过良好的术前准备，手术后并发症发病率及死亡率整体较低，手术发病率和死亡率也与医师及医疗机构水平有关，如果患者基础情况差，肿瘤恶性程度高，并且有转移，手术获益程度低，并且术后出现并发症及死亡的风险高
请问专家肝上肿瘤有10公分那么大还能手术吗	能否进行手术取决于肿瘤的大小、数目、生长部位，有无远处转移，患者肝功能和有无重大基础疾病等多个方面，肿瘤情况决定患者手术是否获益，患者基本情况决定患者手术风险，建议到医院专科进行综合检查评估诊治，通常肿瘤越大，其手术切除难度越大，手术风险越高
肝癌晚期能换肝吗	肝癌能否行肝移植术需要医师评估，原位肝移植适用于不耐受肝切除术、孤立肿瘤直径≤5cm或不超过3个单独病变且直径均不超过3cm、无肉眼可见血管侵犯证据、且无淋巴结或远处转移的患者。建议到医院进行评估，判断是否拥有肝移植指征
肝癌的早期治疗	肝癌首选治疗是手术切除，对于不符合切除术的患者，可以选择非手术消融方法和全身治疗，治疗的选择取决于患者基础肝病的严重程度、肝内肿瘤的大小和分布、血供情况以及患者总体体能，建议到医院进行评估，多学科联合会诊诊治
我今天做B超查出是肝血管瘤最大的2公分，需不需要手术？	肝血管瘤手术指征：1.血管瘤直径＞10cm；2.肿瘤直径5-10cm，但有外伤破裂大出血可能；3.肿瘤直径3-5cm，有明显症状，或不能除外肝癌；对于肿瘤直径2cm，无明显症状的肝血管瘤，暂不需要手术，每隔3-6个月行超声或其他影像学检查复查即可，建议到医院进行诊治，判断肿瘤生长情况，是否拥有手术指征
肝肿瘤压迫胆管不能做支架怎么办？	肝癌首选治疗是手术切除，通过对肝脏肿瘤切除达到治疗效果，对于不符合切除术的患者，可以选择非手术消融方法和全身治疗，治疗的选择取决于患者基础肝病的严重程度、肝内肿瘤的大小和分布、血供情况以及患者总体体能，肝癌的治疗需要多学科联合诊治，建议进行多学科会诊，制定个体化治疗方案，如肿瘤压迫胆管，出现黄疸症状，且血胆红素指标较高，不能放入之间，可以考虑行经皮肝穿胆管引流术，建议到医院进行评估，看是否有相应指征
我妈妈肝右后叶有个血管瘤需要切除吗？	肝血管瘤手术指征：1.血管瘤直径＞10cm；2.肿瘤直径5-10cm，但有外伤破裂大出血可能；3.肿瘤直径3-5cm，有明显症状，或不能除外肝癌；对于肿瘤直径小，无明显症状的肝血管瘤，暂不需要手术，每隔3-7个月行超声或其他影像学检查复查即可，建议到医院进行诊治，判断肿瘤生长情况，是否拥有手术指征
肝癌在什么情况下可以做肝移植	肝癌能否行肝移植术需要医师评估，原位肝移植适用于不耐受肝切除术、孤立肿瘤直径≤5cm或不超过3个单独病变且直径均不超过3cm、无肉眼可见血管侵犯证据、且无淋巴结或远处转移的患者。建议到医院进行评估，判断是否拥有肝移植指征
弟弟肝癌晚期，想知道有没有什么更好的治疗方法	肝癌可以通过多种方式治疗，常见的方式有：肝切除，肝移植，射频等消融术，经动脉化疗栓塞，放疗，全身化疗及分子靶向治疗，治疗方式选择取决于患者肿瘤分期、肝功能情况、当地医疗条件等多种因素，建议到医院专科进行评估，多学科联合治疗
我父亲前三天查出晚期肝癌还有希望吗？	肝癌的预后取决于患者肿瘤分期，基本情况及综合治疗效果，对于恶性程度低，基本情况较好，以及综合治疗取得很好效果患者，通常预后较好，生存时间较长，建议尽早到医院进行多学科联合诊治，制定个体化治疗方案，从而获得较好的治疗效果
肝癌晚期可以做肝移植吗?一般情况下能过多久?	肝癌能否行肝移植术需要医师评估，原位肝移植适用于不耐受肝切除术、孤立肿瘤直径≤5cm或不超过3个单独病变且直径均不超过5cm、无肉眼可见血管侵犯证据、且无淋巴结或远处转移的患者。建议到医院进行评估，判断是否拥有肝移植指征
肝癌手术安全吗	满足肝癌手术切除指征并且没有明确手术禁忌的患者经过良好的术前准备，手术后并发症发病率及死亡率整体较低，手术发病率和死亡率也与医师及医疗机构水平有关
肝癌病人（肿瘤2-3公分）可以做手术吗	通常情况下，对于拥有单个病灶，生命体征平稳，基础情况较好，没有肿瘤远处转移的患者，直径≤5cm均可以实施手术治疗
我爸爸得了肝癌,已经晚期,请问能换肝脏吗?	肝癌能否行肝移植术需要医师评估，原位肝移植适用于不耐受肝切除术、孤立肿瘤直径≤5cm或不超过3个单独病变且直径均不超过3cm、无肉眼可见血管侵犯证据、且无淋巴结或远处转移的患者。建议到医院进行评估，判断是否拥有肝移植指征
肝癌3个8厘米肿块，能开刀吗？	能否进行手术取决于肿瘤的大小、数目、生长部位，有无远处转移，患者肝功能和有无重大基础疾病等多个方面，肿瘤情况决定患者手术是否获益，患者基本情况决定患者手术风险，建议到医院专科进行综合检查评估诊治
高分化肝癌怎么治？	肝癌首选治疗是手术切除，通过对肝脏肿瘤切除达到治疗效果，对于不符合切除术的患者，可以选择非手术消融方法和全身治疗，治疗的选择取决于患者基础肝病的严重程度、肝内肿瘤的大小和分布、血供情况以及患者总体体能，肝癌的治疗需要多学科联合诊治，建议进行多学科会诊，制定个体化治疗方案
丙肝引起的肝癌怎么办	丙肝及肝癌联合治疗，到专科医院评估，如果患者丙肝控制良好，症状平稳，肝功能尚可，可以行肝癌治疗，定期复查丙肝指标，根据情况行抗病毒治疗
肝癌手术后怎么护理？	术后患者护理应听从医生安排，密切关注患者身体情况变化，及时反馈遇到的问题
84岁老人肝部有肿瘤是否能开刀？	能否进行手术取决于肿瘤的大小、数目、生长部位，有无远处转移，患者肝功能和有无重大基础疾病等多个方面，肿瘤情况决定患者手术是否获益，患者基本情况决定患者手术风险，建议到医院专科进行综合检查评估诊治
70多岁的老人得了肝癌中晚期，该怎么办	肝癌可以通过多种方式治疗，常见的方式有：肝切除，肝移植，射频等消融术，经动脉化疗栓塞，放疗，全身化疗及分子靶向治疗，治疗方式选择取决于患者肿瘤分期、肝功能情况、当地医疗条件等多种因素，建议到医院专科进行评估，多学科联合治疗
3毫米肝癌能手术吗？	通常情况下，对于拥有单个病灶，生命体征平稳，基础情况较好，没有肿瘤远处转移的患者，直径≤5cm均可以实施手术治疗
肝癌的手术，射频，介入等治疗怎么选择	肝癌首选治疗是手术切除，对于不符合切除术的患者，可以选择非手术消融方法和全身治疗，治疗的选择取决于患者基础肝病的严重程度、肝内肿瘤的大小和分布、血供情况以及患者总体体能，建议到医院进行评估，多学科联合会诊诊治
肝肿瘤已经八公分了,适合手术吗？	能否进行手术取决于肿瘤的大小、数目、生长部位，有无远处转移，患者肝功能和有无重大基础疾病等多个方面，肿瘤情况决定患者手术是否获益，患者基本情况决定患者手术风险，建议到医院专科进行综合检查评估诊治，通常肿瘤越大，其手术切除难度越大，手术风险越高
得了肝癌我的肝可以给他换吗	肝癌能否行肝移植术需要医师评估，原位肝移植适用于不耐受肝切除术、孤立肿瘤直径≤5cm或不超过3个单独病变且直径均不超过3cm、无肉眼可见血管侵犯证据、且无淋巴结或远处转移的患者。同时肝脏供者也需要进行严格临床评估，评估其肝功能，供体情况，免疫情况等问题
老人检查出肝癌晚期该怎么办	肝癌首选治疗是手术切除，通过对肝脏肿瘤切除达到治疗效果，老龄患者往往伴有基础疾病，术后恢复较慢，因此手术风险往往较高，术后出现并发症和死亡的概率相对较大，如果诊断为晚期，往往存在远处转移，常常丧失手术机会，对于不符合切除术的患者，可以选择非手术消融方法和全身治疗，治疗的选择取决于患者基础肝病的严重程度、肝内肿瘤的大小和分布、血供情况以及患者总体体能，肝癌的治疗需要多学科联合诊治，建议进行多学科会诊，制定个体化治疗方案
射波刀是如何治疗肝癌？	立体定向体部放射治疗，采用多重非平行放射束，通过单次或数次大剂量分割辐射发射置精确定位的小范围目标，这些射线束汇聚于靶病变，通过放射线破坏肿瘤细胞，从而达到治疗目的，目前用该技术治疗原发性肝癌的经验有限，对于其他治疗效果不佳的患者，该技术可能是现有消融治疗选择的补充
十公分肝癌肿瘤大出血有救吗？	肝癌破裂出血是一种严重的并发症，可能由于肿瘤的发展或治疗后坏死软化，也可以因外力、负压升高或在体检后发生破裂，肝癌破裂出血可引起急腹症和失血性休克，因此应立即到肝胆外科行手术治疗，其预后取决于患者的出血量，身体情况，肿瘤情况，肝功能情况，治疗是否及时等多个因素
肝硬化肝癌能手术吗？	能否进行手术取决于肿瘤的大小、数目、生长部位，有无远处转移，患者肝功能和有无重大基础疾病等多个方面，肿瘤情况决定患者手术是否获益，患者基本情况决定患者手术风险，建议到医院专科进行综合检查评估诊治
肝硬化合并小肝癌的最佳治疗方法是什么？	肝癌首选治疗是手术切除，通过对肝脏肿瘤切除达到治疗效果，对于不符合切除术的患者，可以选择非手术消融方法和全身治疗，治疗的选择取决于患者基础肝病的严重程度、肝内肿瘤的大小和分布、血供情况以及患者总体体能，肝癌的治疗需要多学科联合诊治，建议进行多学科会诊，制定个体化治疗方案
什么是肝细胞癌中分化手术后需要怎么治	肝癌首选治疗是手术切除，通过对肝脏肿瘤切除达到治疗效果，对于不符合切除术的患者，可以选择非手术消融方法和全身治疗，治疗的选择取决于患者基础肝病的严重程度、肝内肿瘤的大小和分布、血供情况以及患者总体体能，肝癌的治疗需要多学科联合诊治，建议进行多学科会诊，制定个体化治疗方案
肝癌晚期有腹水不能吃东西能手术吗？	能否进行手术取决于肿瘤的大小、数目、生长部位，有无远处转移，患者肝功能和有无重大基础疾病等多个方面，肿瘤情况决定患者手术是否获益，患者基本情况决定患者手术风险，建议到医院专科进行综合检查评估诊治
肝癌2期能医好吗？	肝癌预后取决于多种因素，肝癌分期是影响预后的重要因素，然而肝癌分期是复杂的，没有一种分期适用于所有患者，患者预后往往还取决于患者基本情况，治疗方案，甲胎蛋白水平等，尽早治疗，多学科联合治疗，定期复查，往往可以获得更好的预后
微创手术适合什么肝癌患者？	微创手术适合肿瘤切除相对简单或身体情况相对较差的患者，手术方式选择取决于患者的肿瘤情况，患者一般情况以及医师医疗机构基本情况等多个因素，如患者肿瘤情况差，医疗机构缺乏微创手术经验，则不建议行微创方式。建议到医院进行评估，从而制定合适的手术方式，通常情况下微创手术创伤相对较小，术后恢复相对较快
肝癌手术后肝区隐隐痛？	肝癌术后会出现腹痛现象，可能由于手术或肿瘤导致，如疼痛剧烈，需要向医生反馈，必要时行相关检查明确病因，及时对症处理
肝癌的手术，射频，介入等治疗怎么选择	肝癌首选治疗是手术切除，对于不符合切除术的患者，可以选择非手术消融方法和全身治疗，治疗的选择取决于患者基础肝病的严重程度、肝内肿瘤的大小和分布、血供情况以及患者总体体能，建议到医院进行评估，多学科联合会诊诊治
肝肿瘤切除是大手术吗？	肝肿瘤切除是大手术，肝脏解剖结构复杂，拥有丰富血管，因此手术出血往往较多，对于肝癌患者，手术切除部位可能涉及到多个肝段，多脏器切除，手术需要根据肿瘤情况判断切除范围，术后可能出现严重并发症甚至死亡，建议在拥有丰富手术经验的医师及相关诊疗经验的医疗机构中进行
肝癌5种早期的治疗方法	肝癌可以通过多种方式治疗，常见的方式有：肝切除，肝移植，射频等消融术，经动脉化疗栓塞，放疗，全身化疗及分子靶向治疗，治疗方式选择取决于患者肿瘤分期、肝功能情况、当地医疗条件等多种因素，建议到医院专科进行评估，多学科联合治疗
肝癌晚期可以做冷冻手术吗？	对于原发性肝脏肿瘤，大多数医院往往倾向于使用并发症发生率低的消融方式，如射频消融，仅有少数医疗机构进行冷冻消融术，作为局部热损伤并发症可能性较高的肿瘤射频消融的替代疗法，建议到医院进行评估，制定个体化治疗方案
肝癌患者可以等待多长时间再做肝移植？	肝移植患者等待供体器官的时间往往较长，在等待期间可以进行TACE等过渡治疗，能够等待时间取决于肿瘤进展的情况以及过渡治疗疗效，如肿瘤进展较快，过渡治疗疗效不佳，则等待时间较短，往往未等到肝源即失去肝移植指征
肝癌做微创还是一般手术好？	手术方式选择取决于患者的肿瘤情况，患者一般情况以及医师医疗机构基本情况等多个因素，如患者肿瘤情况差，医疗机构缺乏微创手术经验，则不建议行微创方式。建议到医院进行评估，从而制定合适的手术方式，通常情况下微创手术创伤相对较小，术后恢复相对较快
肝腺瘤手术风险大吗？	肝腺瘤手术风险与多个因素有关，如肿瘤大小，肿瘤位置，患者一般情况等，对于肿瘤较小，一般情况较好的患者，术后出现并发症及死亡风险较低
肝癌腹腔镜手术好吗？	腹腔镜手术可以减少对患者的创伤，促进患者术后恢复，减少术后并发症的发生。腹腔镜肝切除术难度较大，对于经验丰富的医生，腹腔镜肝切除是安全可行的，该操作对技术要求很高，建议在手术量大的医院进行
肝硬化变成肝癌后还能治疗吗	肝癌首选治疗是手术切除，通过对肝脏肿瘤切除达到治疗效果，对于不符合切除术的患者，可以选择非手术消融方法和全身治疗，治疗的选择取决于患者基础肝病的严重程度、肝内肿瘤的大小和分布、血供情况以及患者总体体能，肝癌的治疗需要多学科联合诊治，建议进行多学科会诊，制定个体化治疗方案
肝部有超大肿瘤，良性的话需要做手术吗？	肝脏常见良性肿瘤包括：肝血管瘤，肝腺瘤、局灶结节增生；（1）肝血管瘤手术指征：1.血管瘤直径＞10cm；2.肿瘤直径5-10cm，但有外伤破裂大出血可能；3.肿瘤直径3-5cm，有明显症状，或不能除外肝癌；（2）肝腺瘤：有恶变和发生破裂出血的可能性，一旦明确该诊断，应予以手术切除；（3）局灶结节增生：无症状或肿瘤体积较小患者，一般不予治疗，定期影像学观察，对于有明确症状、肿瘤体积较大和不能排除恶变患者，积极手术是较安全方法。建议到医院明确诊断，进行评估，如果满足相应手术指征，良性肿瘤也需要进行手术
肝癌肝腹水排水好吗？	对于由于肝癌引起的腹水，通常治疗方式为应用利尿剂而不是反复大量穿刺放液治疗，大量穿刺放液治疗仅应用于利尿剂治疗效果不佳患者，腹水可能由肝硬化，门脉高压，肿瘤引起，因此建议到医院明确诊断，对症治疗
肝硬化腹水，又转成肝癌，还有救吗	肝癌首选治疗是手术切除，通过对肝脏肿瘤切除达到治疗效果，对于不符合切除术的患者，可以选择非手术消融方法和全身治疗，治疗的选择取决于患者基础肝病的严重程度、肝内肿瘤的大小和分布、血供情况以及患者总体体能，肝癌的治疗需要多学科联合诊治，建议进行多学科会诊，制定个体化治疗方案
肝癌的综合治疗	肝癌可以通过多种方式治疗，常见的方式有：肝切除，肝移植，射频等消融术，经动脉化疗栓塞，放疗，全身化疗及分子靶向治疗，治疗方式选择取决于患者肿瘤分期、肝功能情况、当地医疗条件等多种因素，建议到医院专科进行评估，多学科联合治疗
肝癌患者可以做肝移植吗？	肝癌能否行肝移植术需要医师评估，原位肝移植适用于不耐受肝切除术、孤立肿瘤直径≤5cm或不超过3个单独病变且直径均不超过3cm、无肉眼可见血管侵犯证据、且无淋巴结或远处转移的患者。建议到医院进行评估，判断是否拥有肝移植指征
肝癌子灶如何治疗能好	肝癌首选治疗是手术切除，通过对肝脏肿瘤切除达到治疗效果，对于不符合切除术的病灶，可以选择非手术消融方法和全身治疗，治疗的选择取决于患者基础肝病的严重程度、肝内肿瘤的大小和分布、血供情况以及患者总体体能，肝癌的治疗需要多学科联合诊治，建议进行多学科会诊，制定个体化治疗方案
肝部肿瘤手术是开腹吗？	肝部肿瘤可以开腹可以维持，手术方式选择取决于患者的肿瘤情况，患者一般情况以及医师医疗机构基本情况等多个因素，如患者肿瘤情况差，医疗机构缺乏微创手术经验，则不建议行微创方式。建议到医院进行评估，从而制定合适的手术方式，通常情况下微创手术创伤相对较小，术后恢复相对较快
肝癌合并门静脉癌栓能否进行肝移植	肝癌能否行肝移植术需要医师评估，原位肝移植适用于不耐受肝切除术、孤立肿瘤直径≤5cm或不超过3个单独病变且直径均不超过3cm、无肉眼可见血管侵犯证据、且无淋巴结或远处转移的患者。建议到医院进行评估，判断是否拥有肝移植指征
肝血管瘤8公分是否可以手术，要怎么样解决？	肝血管瘤手术指征：1.血管瘤直径＞10cm；2.肿瘤直径5-10cm，但有外伤破裂大出血可能；3.肿瘤直径3-5cm，有明显症状，或不能除外肝癌；对于肿瘤直径8cm，如无破裂出血可能，暂不需要手术，每隔3-6个月行超声或其他影像学检查复查即可，建议到医院进行诊治，判断肿瘤生长情况，是否拥有手术指征
肝细胞癌中分化好治疗吗？完全恢复的几率大吗	肝癌的预后取决于患者肿瘤分期，基本情况及综合治疗效果，对于恶性程度低，基本情况较好，以及综合治疗取得很好效果患者，通常预后较好，生存时间较长，建议尽早到医院进行多学科联合诊治，制定个体化治疗方案，从而获得较好的治疗效果
肝恶性肿瘤能做手术吗？	能否进行手术取决于肿瘤的大小、数目、生长部位，有无远处转移，患者肝功能和有无重大基础疾病等多个方面，肿瘤情况决定患者手术是否获益，患者基本情况决定患者手术风险，建议到医院专科进行综合检查评估诊治
肝癌挂号应该挂外科还是内科	肝癌首选治疗是手术切除，建议首先挂外科评估能否切除，对于不符合切除术的患者，可以选择非手术消融方法和全身治疗，建议挂放射科及肿瘤内科综合评估，制定治疗方案，肝癌是多学科综合诊治的过程，建议多学科联合会诊，制定个体化治疗方案
肝硬化腹水导致肝癌怎样治疗，会传染人吗	肝癌首选治疗是手术切除，通过对肝脏肿瘤切除达到治疗效果，对于不符合切除术的患者，可以选择非手术消融方法和全身治疗，治疗的选择取决于患者基础肝病的严重程度、肝内肿瘤的大小和分布、血供情况以及患者总体体能，肝癌的治疗需要多学科联合诊治，建议进行多学科会诊，制定个体化治疗方案，肝癌本身不会传染，如果患者拥有病毒性肝炎，病毒性肝炎可以传染
肝上长瘤是否用微创手术。不能直接切掉吧？	手术方式选择取决于患者的肿瘤情况，患者一般情况以及医师医疗机构基本情况等多个因素，如患者肿瘤情况差，医疗机构缺乏微创手术经验，则不建议行微创方式。建议到医院进行评估，从而制定合适的手术方式，通常情况下微创手术创伤相对较小，术后恢复相对较快
肝癌的治疗方法有哪些？	肝癌可以通过多种方式治疗，常见的方式有：肝切除，肝移植，射频等消融术，经动脉化疗栓塞，放疗，全身化疗及分子靶向治疗，治疗方式选择取决于患者肿瘤分期、肝功能情况、当地医疗条件等多种因素，建议到医院专科进行评估，多学科联合治疗
肝癌做了两次介入还可以手术吗	能否进行手术取决于肿瘤的大小、数目、生长部位，有无远处转移，患者肝功能和有无重大基础疾病等多个方面，肿瘤情况决定患者手术是否获益，患者基本情况决定患者手术风险，建议到医院专科进行综合检查评估诊治
肝癌肿瘤由于肿瘤太大不能手术	肝癌首选治疗是手术切除，通过对肝脏肿瘤切除达到治疗效果，对于不符合切除术的患者，可以选择非手术消融方法和全身治疗，治疗的选择取决于患者基础肝病的严重程度、肝内肿瘤的大小和分布、血供情况以及患者总体体能，肝癌的治疗需要多学科联合诊治，建议进行多学科会诊，制定个体化治疗方案
肝癌后期，就诊挂哪个科室	肝癌首选治疗是手术切除，建议首先挂外科评估能否切除，对于不符合切除术的患者，可以选择非手术消融方法和全身治疗，建议挂放射科及肿瘤内科综合评估，制定治疗方案，肝癌是多学科综合诊治的过程，建议多学科联合会诊，制定个体化治疗方案
肝硬化肝癌还能手术吗？	能否进行手术取决于肿瘤的大小、数目、生长部位，有无远处转移，患者肝功能和有无重大基础疾病等多个方面，肿瘤情况决定患者手术是否获益，患者基本情况决定患者手术风险，建议到医院专科进行综合检查评估诊治
肝癌肿瘤大小约5cm未转移需要手术吗	肝癌首选治疗是手术切除，通过对肝脏肿瘤切除达到治疗效果，通常情况下，对于拥有单个病灶，生命体征平稳，基础情况较好，没有肿瘤远处转移的患者，直径≤5cm均可以实施手术治疗，术后辅助介入、化疗等手段，往往可以获得较好预后
肝癌中晚期可以肝移植手术吗	肝癌能否行肝移植术需要医师评估，原位肝移植适用于不耐受肝切除术、孤立肿瘤直径≤5cm或不超过3个单独病变且直径均不超过3cm、无肉眼可见血管侵犯证据、且无淋巴结或远处转移的患者。建议到医院进行评估，判断是否拥有肝移植指征
老人，男，80岁。肝癌中晚期有治疗好的可能吗？	肝癌的预后取决于患者肿瘤分期，基本情况及综合治疗效果，对于恶性程度低，基本情况较好，以及综合治疗取得很好效果患者，通常预后较好，生存时间较长，建议尽早到医院进行多学科联合诊治，制定个体化治疗方案，从而获得较好的治疗效果
肝癌中晚期能不能动手术？	能否进行手术取决于肿瘤的大小、数目、生长部位，有无远处转移，患者肝功能和有无重大基础疾病等多个方面，肿瘤情况决定患者手术是否获益，患者基本情况决定患者手术风险，建议到医院专科进行综合检查评估诊治
老年人74岁，肝上长了80、60肿瘤，要紧吗。	肝癌首选治疗是手术切除，通过对肝脏肿瘤切除达到治疗效果，对于不符合切除术的患者，可以选择非手术消融方法和全身治疗，治疗的选择取决于患者基础肝病的严重程度、肝内肿瘤的大小和分布、血供情况以及患者总体体能，肝癌的治疗需要多学科联合诊治，建议进行多学科会诊，制定个体化治疗方案，通常治疗越早，其治疗效果往往越好
肝癌的早期治疗	肝癌首选治疗是手术切除，对于不符合切除术的患者，可以选择非手术消融方法和全身治疗，治疗的选择取决于患者基础肝病的严重程度、肝内肿瘤的大小和分布、血供情况以及患者总体体能，建议到医院进行评估，多学科联合会诊诊治
肝癌中期能手术吗？成功率占多少？	能否进行手术取决于肿瘤的大小、数目、生长部位，有无远处转移，患者肝功能和有无重大基础疾病等多个方面，肿瘤情况决定患者手术是否获益，患者基本情况决定患者手术风险，建议到医院专科进行综合检查评估诊治，不同患者基本情况不同，其手术风险也不一样
肝癌放疗痛苦吗	肝癌放疗是肝癌的治疗手段之一，目前并没有大范围推广，肝癌放疗和化疗相比拥有毒性相对较低，副作用相对有限，有治疗肿瘤负载较重的潜力，痛苦程度相对较轻的特点
肝硬化恶性肿瘤能治吗？	肝癌首选治疗是手术切除，通过对肝脏肿瘤切除达到治疗效果，对于不符合切除术的患者，可以选择非手术消融方法和全身治疗，治疗的选择取决于患者基础肝病的严重程度、肝内肿瘤的大小和分布、血供情况以及患者总体体能，肝癌的治疗需要多学科联合诊治，建议进行多学科会诊，制定个体化治疗方案
肝癌可以不想做手术可以吗？	肝癌首选治疗是手术切除，对于不符合切除术的患者，可以选择非手术消融方法和全身治疗，治疗的选择取决于患者基础肝病的严重程度、肝内肿瘤的大小和分布、血供情况以及患者总体体能，肝癌的治疗需要多学科联合诊治，建议进行多学科会诊，制定个体化治疗方案
肝上长肿瘤怎么办？可以做手术吗？	能否进行手术取决于肿瘤的大小、数目、生长部位，有无远处转移，患者肝功能和有无重大基础疾病等多个方面，肿瘤情况决定患者手术是否获益，患者基本情况决定患者手术风险，建议到医院专科进行综合检查评估诊治
肝硬化伴肝癌可以手术吗	能否进行手术取决于肿瘤的大小、数目、生长部位，有无远处转移，患者肝功能和有无重大基础疾病等多个方面，肿瘤情况决定患者手术是否获益，患者基本情况决定患者手术风险，建议到医院专科进行综合检查评估诊治，肝癌伴肝硬化患者手术风险往往较高，术后出血肝衰竭和死亡的风险往往较大
肝上血管瘤大小10*10mm要手术吗	肝血管瘤手术指征：1.血管瘤直径＞10cm；2.肿瘤直径5-10cm，但有外伤破裂大出血可能；3.肿瘤直径3-5cm，有明显症状，或不能除外肝癌；对于肿瘤直径10mm，无明显症状的肝血管瘤，暂不需要手术，每隔3-6个月行超声或其他影像学检查复查即可，建议到医院进行诊治，判断肿瘤生长情况，是否拥有手术指征
肝癌患者大量腹水能否做腹水浓缩回输	腹水浓缩回输可以将腹水中蛋白质回收利用，改善负氮平衡，提高血胶体渗透压，具体方案应根据患者基本情况由医生制定
肝癌肿瘤大约有15厘米能做手术吗	能否进行手术取决于肿瘤的大小、数目、生长部位，有无远处转移，患者肝功能和有无重大基础疾病等多个方面，肿瘤情况决定患者手术是否获益，患者基本情况决定患者手术风险，建议到医院专科进行综合检查评估诊治
晚期肝癌为什么保守治疗	肝癌首选治疗是手术切除，通过对肝脏肿瘤切除达到治疗效果，对于不符合切除术的患者，可以选择非手术消融方法和全身治疗，治疗的选择取决于患者基础肝病的严重程度、肝内肿瘤的大小和分布、血供情况以及患者总体体能，肝癌的治疗需要多学科联合诊治，建议进行多学科会诊，制定个体化治疗方案，一些患者肿瘤进展较快，手术切除往往不能获益，或者患者基础情况较差，不能耐受手术创伤，对于这些患者往往会采取保守治疗方式
肝癌晚期切了一半肝，肝还会长吗？	肝脏再生能力很强，肝脏再生能力受肝脏功能，年龄，残余肝体积，黄疸等多种因素影响，通常情况下对于肝功能良好，拥有足够剩余肝体积，一般情况较好的患者，肝脏可以再生恢复
肝硬化严重的肝癌早期患者适合做手术吗？	能否进行手术取决于肿瘤的大小、数目、生长部位，有无远处转移，患者肝功能和有无重大基础疾病等多个方面，肿瘤情况决定患者手术是否获益，患者基本情况决定患者手术风险，建议到医院专科进行综合检查评估诊治，肝癌治疗越早，其预后往往越好
如果得了肝癌应该怎么办	肝癌首选治疗是手术切除，通过对肝脏肿瘤切除达到治疗效果，老龄患者往往伴有基础疾病，术后恢复较慢，因此手术风险往往较高，术后出现并发症和死亡的概率相对较大，如果诊断为晚期，往往存在远处转移，常常丧失手术机会，对于不符合切除术的患者，可以选择非手术消融方法和全身治疗，治疗的选择取决于患者基础肝病的严重程度、肝内肿瘤的大小和分布、血供情况以及患者总体体能，肝癌的治疗需要多学科联合诊治，建议进行多学科会诊，制定个体化治疗方案
肝癌中晚期能做手术吗?	能否进行手术取决于肿瘤的大小、数目、生长部位，有无远处转移，患者肝功能和有无重大基础疾病等多个方面，肿瘤情况决定患者手术是否获益，患者基本情况决定患者手术风险，建议到医院专科进行综合检查评估诊治
肝上长了1个12公分的肿瘤适合开刀吗	能否进行手术取决于肿瘤的大小、数目、生长部位，有无远处转移，患者肝功能和有无重大基础疾病等多个方面，肿瘤情况决定患者手术是否获益，患者基本情况决定患者手术风险，建议到医院专科进行综合检查评估诊治
肝癌晚期能不能用电疗	肝癌可以通过多种方式治疗，常见的方式有：肝切除，肝移植，射频等消融术，经动脉化疗栓塞，放疗，全身化疗及分子靶向治疗，治疗方式选择取决于患者肿瘤分期、肝功能情况、当地医疗条件等多种因素，建议到医院专科进行评估，多学科联合治疗
肝癌可以换肝吗	肝癌能否行肝移植术需要医师评估，原位肝移植适用于不耐受肝切除术、孤立肿瘤直径≤5cm或不超过3个单独病变且直径均不超过3cm、无肉眼可见血管侵犯证据、且无淋巴结或远处转移的患者。建议到医院进行评估，判断是否拥有肝移植指征
肝癌可以不做手术吗	肝癌首选治疗是手术切除，对于不符合切除术的患者，可以选择非手术消融方法和全身治疗，治疗的选择取决于患者基础肝病的严重程度、肝内肿瘤的大小和分布、血供情况以及患者总体体能，肝癌的治疗需要多学科联合诊治，建议进行多学科会诊，制定个体化治疗方案
老人查出肝癌晚期，请问有什么治疗方法？	肝癌首选治疗是手术切除，通过对肝脏肿瘤切除达到治疗效果，老龄患者往往伴有基础疾病，术后恢复较慢，因此手术风险往往较高，术后出现并发症和死亡的概率相对较大，如果诊断为晚期，往往存在远处转移，常常丧失手术机会，对于不符合切除术的患者，可以选择非手术消融方法和全身治疗，治疗的选择取决于患者基础肝病的严重程度、肝内肿瘤的大小和分布、血供情况以及患者总体体能，肝癌的治疗需要多学科联合诊治，建议进行多学科会诊，制定个体化治疗方案
肝癌晚期可以做肝移植吗	肝癌能否行肝移植术需要医师评估，原位肝移植适用于不耐受肝切除术、孤立肿瘤直径≤5cm或不超过3个单独病变且直径均不超过4cm、无肉眼可见血管侵犯证据、且无淋巴结或远处转移的患者。建议到医院进行评估，判断是否拥有肝移植指征
晚期肝部恶性肿瘤切除手术	肝癌首选治疗是手术切除，通过对肝脏肿瘤切除达到治疗效果，对于不符合切除术的患者，可以选择非手术消融方法和全身治疗，治疗的选择取决于患者基础肝病的严重程度、肝内肿瘤的大小和分布、血供情况以及患者总体体能，肝癌的治疗需要多学科联合诊治，建议进行多学科会诊，制定个体化治疗方案
肝脏肿瘤射频消融治疗的优缺点	射频消融术拥有安全、简便、创伤小等特点，术后并发症较肝癌切除术轻，适用于不适合行手术切除患者，其治疗效果和肝切除术相比尚无定论，有些病人可以获得较好的治疗效果，通常认为如果能行手术切除优先选择手术切除治疗
肝癌微创手术怎么做？	微创肝切除术指在腹腔镜或机器人辅助下进行肝切除手术，微创手术可以通过腹部微小切口放入相应器械，医生操作手术器械进行手术操作，和开腹手术相比微创腹部切口小，术后恢复相对较快，疼痛感往往较轻，出血量相对较少
肝长一个恶性肿瘤能做手术吗？	能否进行手术取决于肿瘤的大小、数目、生长部位，有无远处转移，患者肝功能和有无重大基础疾病等多个方面，肿瘤情况决定患者手术是否获益，患者基本情况决定患者手术风险，建议到医院专科进行综合检查评估诊治
肝癌在什么情况下可以做肝移植	肝癌能否行肝移植术需要医师评估，原位肝移植适用于不耐受肝切除术、孤立肿瘤直径≤5cm或不超过3个单独病变且直径均不超过3cm、无肉眼可见血管侵犯证据、且无淋巴结或远处转移的患者。建议到医院进行评估，判断是否拥有肝移植指征
肝癌晚期做射频消融治疗有效果吗？	射频消融术指对于病变处局部施以射频热能，使电极周围肿瘤细胞死亡，形成坏死区域，作为不符合肝切除手术患者的一种替代治疗，单个肿瘤且直径小于4cm患者治疗结果往往最好
肝脏肿瘤的治疗方法？	肝脏肿瘤分良性肿瘤和恶性肿瘤，良性肿瘤可以定期复查或手术治疗，肝恶性肿瘤可以通过多种方式治疗，常见的方式有：肝切除，肝移植，射频等消融术，经动脉化疗栓塞，放疗，全身化疗及分子靶向治疗，建议到医院专科进行评估，明确诊断，如果诊断为肝癌，建议进行多学科联合治疗
肝癌微创手术多久恢复?	恢复时间取决于手术方式，肿瘤分期，患者身体情况以及有无术后并发症等多个因素，对于年轻，基础条件好，肝功能情况好，肿瘤直径小，单个病灶，无远处转移，伤口愈合良好，无重大基础疾病，未出现术后并发症的患者，通常术后10天左右可以恢复到术前精神体力状态
肝脏肿瘤介入和微创哪个好？	肝癌首选治疗是手术切除，通过对肝脏肿瘤切除达到治疗效果，微创手术手术风险往往较低，术后恢复往往较快，对于不符合切除术的患者，可以选择非手术消融方法和全身治疗，治疗的选择取决于患者基础肝病的严重程度、肝内肿瘤的大小和分布、血供情况以及患者总体体能，肝癌的治疗需要多学科联合诊治，建议进行多学科会诊，制定个体化治疗方案
多发性肝癌什么治疗方法最好	多发性肝癌往往失去手术切除机会，可以考虑其他治疗方式，常见非手术切除的治疗方式有：肝切除，肝移植，射频等消融术，经动脉化疗栓塞，放疗，全身化疗及分子靶向治疗，治疗方式选择取决于患者肿瘤分期、肝功能情况、当地医疗条件等多种因素，建议到医院专科进行评估，多学科联合治疗
我外婆80岁刚刚查出肝癌和食道癌可以做手术吗	首先建议到肝胆外科和胸外科或普外科就诊，联合会诊明确病因，判断肿瘤来源，不同来源的肿瘤其治疗方式也不同，如果是肝癌远处转移一般不进行根治性手术治疗，可以考虑非手术消融方法和全身治疗等方法，建议多学科会诊，制定个体化治疗方案
我外婆80岁刚刚查出肝癌和食道癌可以做手术吗	首先建议到肝胆外科和胸外科或普外科就诊，联合会诊明确病因，判断肿瘤来源，不同来源的肿瘤其治疗方式也不同，如果是肝癌远处转移一般不进行根治性手术治疗，可以考虑非手术消融方法和全身治疗等方法，建议多学科会诊，制定个体化治疗方案
小肝癌能手术吗？是不是更容易扩散。中医能治疗吗？	能否进行手术取决于肿瘤的大小、数目、生长部位，有无远处转移，患者肝功能和有无重大基础疾病等多个方面，肿瘤情况决定患者手术是否获益，患者基本情况决定患者手术风险，建议到医院专科进行综合检查评估诊治，是否容易扩散取决于肿瘤分期以及疾病进展程度，中医中药治疗肝癌，临床上多与其他疗法配合用，对保护或改善肝功能、减轻不良反应、提高免疫力有一定作用，可以到相关专科就诊咨询
小肝癌手术成功率有多高？	患者手术风险与肿瘤的大小、数目、生长部位，有无远处转移，患者肝功能和有无重大基础疾病等多个方面有关，不同患者，其基本情况不同，手术风险也不一样，通常来说，对于单发、直径小、一般情况好的病人，其手术风险往往较低，建议到医院专科进行综合检查评估诊治
小肝癌手术大约几个小时	手术时间取决于患者肝癌情况，手术方式，术者及麻醉恢复情况等因素，通常4-8小时
小孩肝癌晚期怎么办？	肝癌首选治疗是手术切除，通过对肝脏肿瘤切除达到治疗效果，对于不符合切除术的患者，可以选择非手术消融方法和全身治疗，治疗的选择取决于患者基础肝病的严重程度、肝内肿瘤的大小和分布、血供情况以及患者总体体能，肝癌的治疗需要多学科联合诊治，建议进行多学科会诊，制定个体化治疗方案
小孩肝癌晚期怎么办？	肝癌首选治疗是手术切除，通过对肝脏肿瘤切除达到治疗效果，对于不符合切除术的患者，可以选择非手术消融方法和全身治疗，治疗的选择取决于患者基础肝病的严重程度、肝内肿瘤的大小和分布、血供情况以及患者总体体能，肝癌的治疗需要多学科联合诊治，建议进行多学科会诊，制定个体化治疗方案
小孩患有肝癌怎么进行治疗	肝癌首选治疗是手术切除，通过对肝脏肿瘤切除达到治疗效果，对于不符合切除术的患者，可以选择非手术消融方法和全身治疗，治疗的选择取决于患者基础肝病的严重程度、肝内肿瘤的大小和分布、血供情况以及患者总体体能，肝癌的治疗需要多学科联合诊治，建议进行多学科会诊，制定个体化治疗方案
一岁半宝宝肝上长个五厘米恶性肿瘤怎么办	首先建议到多学科联合就诊，明确病因，判断肿瘤来源，不同来源的肿瘤其治疗方式也不同，肝癌首选治疗是手术切除，通过对肝脏肿瘤切除达到治疗效果，对于不符合切除术的患者，可以选择非手术消融方法和全身治疗，治疗的选择取决于患者基础肝病的严重程度、肝内肿瘤的大小和分布、血供情况以及患者总体体能，肝癌的治疗需要多学科联合诊治，建议进行多学科会诊，制定个体化治疗方案，对于儿童，需要儿科医生进行联合就诊评估
医生你好，我想问下肝恶性肿瘤能做手术摘除	肝癌首选治疗是手术切除，通过对肝脏肿瘤切除达到治疗效果，对于不符合切除术的患者，可以选择非手术消融方法和全身治疗，治疗的选择取决于患者基础肝病的严重程度、肝内肿瘤的大小和分布、血供情况以及患者总体体能，肝癌的治疗需要多学科联合诊治，建议进行多学科会诊，制定个体化治疗方案，对于恶性肿瘤，通常不做局部肿瘤切除，往往会进行肝段的切除，即除了肿瘤外切除部分还要部分正常肝组织，以减少肿瘤复发的风险
医生你好，我想问下肝恶性肿瘤能做手术摘除	肝癌首选治疗是手术切除，通过对肝脏肿瘤切除达到治疗效果，对于不符合切除术的患者，可以选择非手术消融方法和全身治疗，治疗的选择取决于患者基础肝病的严重程度、肝内肿瘤的大小和分布、血供情况以及患者总体体能，肝癌的治疗需要多学科联合诊治，建议进行多学科会诊，制定个体化治疗方案，对于恶性肿瘤，通常不做局部肿瘤切除，往往会进行肝段的切除，即除了肿瘤外切除部分还要部分正常肝组织，以减少肿瘤复发的风险
乙肝携带现在肝癌，能换肝吗？	肝癌能否行肝移植术需要医师评估，原位肝移植适用于不耐受肝切除术、孤立肿瘤直径≤5cm或不超过3个单独病变且直径均不超过3cm、无肉眼可见血管侵犯证据、且无淋巴结或远处转移的患者。建议到医院进行评估，判断是否拥有肝移植指征，对于乙肝患者，往往还需要检查乙肝相关指标，评估乙肝控制情况
原发性肝癌7厘米能切除吗？	能否进行手术取决于肿瘤的大小、数目、生长部位，有无远处转移，患者肝功能和有无重大基础疾病等多个方面，肿瘤情况决定患者手术是否获益，患者基本情况决定患者手术风险，建议到医院专科进行综合检查评估诊治
原发性肝癌7厘米能切除吗？	能否进行手术取决于肿瘤的大小、数目、生长部位，有无远处转移，患者肝功能和有无重大基础疾病等多个方面，肿瘤情况决定患者手术是否获益，患者基本情况决定患者手术风险，建议到医院专科进行综合检查评估诊治
原发性肝癌术后发烧怎么办	肝癌术后会出现发热现象，可能与组织吸收，机体炎症反应有关，如果体温持续较高，需要判断病因，明确有无感染，治疗措施可以进行物理降温，抗炎等对症治疗，建议到医院就诊，明确病因，制定治疗方案
原发性肝癌术后发烧怎么办	肝癌术后会出现发热现象，可能与组织吸收，机体炎症反应有关，如果体温持续较高，需要判断病因，明确有无感染，治疗措施可以进行物理降温，抗炎等对症治疗，建议到医院就诊，明确病因，制定治疗方案
原发性肝癌早期，请问手术后可以完全根治吗	肝癌切除术只能够切除肉眼可见的肿瘤，可能会有肿瘤细胞残留或者发生无法观察到的转移，因此存在肿瘤复发可能，如果发现较早，手术顺利，术后辅助相关治疗，术后定期随访，往往有一个较好的生存预期，微小肝癌切除术后5年生存率可达90%左右
原发性肝癌肿瘤切除后要怎么护理？	术后患者护理应听从医生和护士安排，密切关注患者身体情况变化，及时反馈遇到的问题
原发性肝癌肿瘤切除后要怎么护理？	术后患者护理应听从医生和护士安排，密切关注患者身体情况变化，及时反馈遇到的问题
早期的肝癌还有的救吗？	肝癌的预后取决于患者肿瘤分期，基本情况及综合治疗效果，对于恶性程度低，基本情况较好，以及综合治疗取得很好效果患者，通常预后较好，生存时间较长，建议尽早到医院进行多学科联合诊治，制定个体化治疗方案，从而获得较好的治疗效果，通常来说，早期肝癌治疗效果相对较好，生存期往往较长
早期肝癌能不能不需要手术，需要怎么判定？	能否进行手术取决于肿瘤的大小、数目、生长部位，有无远处转移，患者肝功能和有无重大基础疾病等多个方面，肿瘤情况决定患者手术是否获益，患者基本情况决定患者手术风险，建议到医院专科进行综合检查评估诊治
早期肝癌能不能不需要手术，需要怎么判定？	能否进行手术取决于肿瘤的大小、数目、生长部位，有无远处转移，患者肝功能和有无重大基础疾病等多个方面，肿瘤情况决定患者手术是否获益，患者基本情况决定患者手术风险，建议到医院专科进行综合检查评估诊治
早期肝癌能彻底治疗吗？最好的结果会怎样？	肝癌切除术只能够切除肉眼可见的肿瘤，可能会有肿瘤细胞残留或者发生无法观察到的转移，因此存在肿瘤复发可能，如果发现较早，手术顺利，术后辅助相关治疗，术后定期随访，往往有一个较好的生存预期，最好的结果肝癌切除术后无复发转移，长期无瘤生存
早期肝癌手术之后，要注意哪些？	术后患者及家属应听从医生安排，密切关注患者身体情况变化，及时反馈遇到的问题，建议多学科联合会诊，制定个体化治疗方案，同时应遵照医嘱按时定期复查
早期肝癌手术治疗方法	肝癌首选治疗是手术切除，通过对肝脏肿瘤切除达到治疗效果，手术治疗可以分为开腹手术和微创手术，也可以分为根治性手术和姑息手术，不同手术手术方式不同，其目的和方法也不一样，治疗的选择取决于患者基础肝病的严重程度、肝内肿瘤的大小和分布、血供情况以及患者总体体能，建议到肝胆外科就诊，制定个体化治疗方案
早期肝癌一定要手术吗	肝癌首选治疗是手术切除，通过对肝脏肿瘤切除达到治疗效果，对于不符合切除术的患者，可以选择非手术消融方法和全身治疗，治疗的选择取决于患者基础肝病的严重程度、肝内肿瘤的大小和分布、血供情况以及患者总体体能，肝癌的治疗需要多学科联合诊治，建议进行多学科会诊，制定个体化治疗方案
早期肝癌有哪些治疗方法？	肝癌可以通过多种方式治疗，常见的方式有：肝切除，肝移植，射频等消融术，经动脉化疗栓塞，放疗，全身化疗及分子靶向治疗，治疗方式选择取决于患者肿瘤分期、肝功能情况、当地医疗条件等多种因素，建议到医院专科进行评估，多学科联合治疗
早期肝硬化癌变了怎么办	肝癌首选治疗是手术切除，通过对肝脏肿瘤切除达到治疗效果，对于不符合切除术的患者，可以选择非手术消融方法和全身治疗，治疗的选择取决于患者基础肝病的严重程度、肝内肿瘤的大小和分布、血供情况以及患者总体体能，肝癌的治疗需要多学科联合诊治，建议进行多学科会诊，制定个体化治疗方案
早期原发性肝癌有救吗？	肝癌的预后取决于患者肿瘤分期，基本情况及综合治疗效果，对于恶性程度低，基本情况较好，以及综合治疗取得很好效果患者，通常预后较好，生存时间较长，建议尽早到医院进行多学科联合诊治，制定个体化治疗方案，从而获得较好的治疗效果，通常来说，早期肝癌治疗效果相对较好，生存期往往较长
早期原发性肝癌有救吗？	肝癌的预后取决于患者肿瘤分期，基本情况及综合治疗效果，对于恶性程度低，基本情况较好，以及综合治疗取得很好效果患者，通常预后较好，生存时间较长，建议尽早到医院进行多学科联合诊治，制定个体化治疗方案，从而获得较好的治疗效果，通常来说，早期肝癌治疗效果相对较好，生存期往往较长
治疗肝癌晚期最好的方法？	肝癌首选治疗是手术切除，通过对肝脏肿瘤切除达到治疗效果，对于不符合切除术的患者，可以选择非手术消融方法和全身治疗，治疗的选择取决于患者基础肝病的严重程度、肝内肿瘤的大小和分布、血供情况以及患者总体体能，肝癌的治疗需要多学科联合诊治，建议进行多学科会诊，制定个体化治疗方案
治疗肝癌晚期最好的方法？	肝癌首选治疗是手术切除，通过对肝脏肿瘤切除达到治疗效果，对于不符合切除术的患者，可以选择非手术消融方法和全身治疗，治疗的选择取决于患者基础肝病的严重程度、肝内肿瘤的大小和分布、血供情况以及患者总体体能，肝癌的治疗需要多学科联合诊治，建议进行多学科会诊，制定个体化治疗方案
中国最好的肝癌医院在哪里	301医院、上海东方肝胆外科医院、复旦大学附属肿瘤医院、北京大学人民医院、北京协和医院、华西医院等多家医院对肝癌治疗都拥有丰富经验
中国最好的肝癌医院在哪里	301医院、上海东方肝胆外科医院、复旦大学附属肿瘤医院、北京大学人民医院、北京协和医院、华西医院等多家医院对肝癌治疗都拥有丰富经验
肝癌介入治疗	答案
做完肝癌介入治疗后感觉腹部疼是不是正常反应	腹痛症状往往没有特异性，可能由于肿瘤引起，也可能由于手术相关引起，肝癌介入术后可能会有腹部不适，如情况无改善，建议到医院就诊，明确病因，对症治疗
做完肝癌介入治疗后感觉腹部疼是不是正常反应	肝癌介入术后会出现腹部疼痛，可能由于手术引起，或者由肿瘤自身引起，长无特异性，如情况无改善，建议到医院就诊，明确病因，对症治疗
作为三大根治手段之一，肝癌射频消融是什么操作？	射频消融术指对于病变处局部施以射频热能，使电极周围肿瘤细胞死亡，形成坏死区域，作为不符合肝切除手术患者的一种替代治疗，单个肿瘤且直径小于4cm患者治疗结果往往最好，该方法适用于瘤体较小而又不能或不适宜手术切除患者，特别是肝癌切除术后早期复发者，有点是安全、简便、创伤小、术后恢复快，有些患者消融术后治疗效果较好
中药治疗肝血管瘤效果好吗？	肝血管瘤的治疗首选手术切除，中药治疗不是肝血管瘤的常见治疗方式，可以到专科进行诊治，对于肝胆外科，肝血管瘤手术指征：1.血管瘤直径＞10cm；2.肿瘤直径5-10cm，但有外伤破裂大出血可能；3.肿瘤直径3-5cm，有明显症状，或不能除外肝癌；对于肿瘤直径10mm，无明显症状的肝血管瘤，暂不需要手术，每隔3-6个月行超声或其他影像学检查复查即可，建议到医院进行诊治，判断肿瘤生长情况，是否拥有手术指征
中晚期肝癌如何治疗？什么是肝癌的介入治疗？	肝癌首选治疗是手术切除，通过对肝脏肿瘤切除达到治疗效果，对于不符合切除术的患者，可以选择非手术消融方法和全身治疗，治疗的选择取决于患者基础肝病的严重程度、肝内肿瘤的大小和分布、血供情况以及患者总体体能，肝癌的治疗需要多学科联合诊治，建议进行多学科会诊，制定个体化治疗方案，对于不可切除的肝癌，介入治疗往往是一个良好的代替治疗方法
中晚期肝癌如何治疗？什么是肝癌的介入治疗？	肝癌首选治疗是手术切除，通过对肝脏肿瘤切除达到治疗效果，对于不符合切除术的患者，可以选择非手术消融方法和全身治疗，治疗的选择取决于患者基础肝病的严重程度、肝内肿瘤的大小和分布、血供情况以及患者总体体能，肝癌的治疗需要多学科联合诊治，建议进行多学科会诊，制定个体化治疗方案，对于不可切除的肝癌，介入治疗往往是一个良好的代替治疗方法
中晚期肝癌的四种介入治疗方法	介入治疗包括消融术，经动脉栓塞、放疗等，射频消融术指对于病变处局部施以射频热能，使电极周围肿瘤细胞死亡，形成坏死区域，作为不符合肝切除手术患者的一种替代治疗，单个肿瘤且直径小于4cm患者治疗结果往往最好，介入栓塞有一定姑息性治疗效果，放疗适合于有些手术断面有残癌或者术后复发患者，介入治疗拥有各自的适应症，可以到医院找介入科医生评估，同时建议进行多学科联合会诊，制定一个综合诊治方案，从而获得更好的治疗效果
早期肝癌手术后要做介入吗	介入治疗包括消融术，经动脉栓塞、放疗等，射频消融术指对于病变处局部施以射频热能，使电极周围肿瘤细胞死亡，形成坏死区域，作为不符合肝切除手术患者的一种替代治疗，单个肿瘤且直径小于4cm患者治疗结果往往最好，介入栓塞有一定姑息性治疗效果，放疗适合于有些手术断面有残癌或者术后复发患者，介入治疗拥有各自的适应症，可以到医院找介入科医生评估，同时建议进行多学科联合会诊，制定一个综合诊治方案，从而获得更好的治疗效果
原发性肝细胞癌手术切除后还需要做介入吗？	介入治疗包括消融术，经动脉栓塞、化疗等，射频消融术指对于病变处局部施以射频热能，使电极周围肿瘤细胞死亡，形成坏死区域，作为不符合肝切除手术患者的一种替代治疗，单个肿瘤且直径小于4cm患者治疗结果往往最好，介入栓塞有一定姑息性治疗效果，放疗适合于有些手术断面有残癌或者术后复发患者，不同手术拥有不同指征，满足相应指征的患者接受介入手术后可以获益，可以到医院找介入科医生评估，同时建议进行多学科联合会诊，制定一个综合诊治方案，从而获得更好的治疗效果
小肝癌用射频消融效果怎么样？	射频消融术指对于病变处局部施以射频热能，使电极周围肿瘤细胞死亡，形成坏死区域，作为不符合肝切除手术患者的一种替代治疗，单个肿瘤且直径小于4cm患者治疗结果往往最好，该方法适用于瘤体较小而又不能或不适宜手术切除患者，特别是肝癌切除术后早期复发者，有点是安全、简便、创伤小、术后恢复快，有些患者消融术后治疗效果较好
小肝癌医生为何不建议手术而是介入治疗？	肝癌首选治疗是手术切除，通过对肝脏肿瘤切除达到治疗效果，对于不符合切除术的患者，可以选择非手术消融方法和全身治疗，治疗的选择取决于患者基础肝病的严重程度、肝内肿瘤的大小和分布、血供情况以及患者总体体能，肝癌的治疗需要多学科联合诊治，建议进行多学科会诊，制定个体化治疗方案，对于不可切除的肝癌，介入治疗往往是一个良好的代替治疗方法
我想问一下，多发性肝癌适合做介入治疗吗？	介入治疗包括消融术，经动脉栓塞、化疗等，射频消融术指对于病变处局部施以射频热能，使电极周围肿瘤细胞死亡，形成坏死区域，作为不符合肝切除手术患者的一种替代治疗，单个肿瘤且直径小于4cm患者治疗结果往往最好，介入栓塞有一定姑息性治疗效果，放疗适合于有些手术断面有残癌或者术后复发患者，可以到医院找介入科医生评估，同时建议进行多学科联合会诊，制定一个综合诊治方案，从而获得更好的治疗效果
我想问一下，多发性肝癌适合做介入治疗吗？	介入治疗包括消融术，经动脉栓塞、化疗等，射频消融术指对于病变处局部施以射频热能，使电极周围肿瘤细胞死亡，形成坏死区域，作为不符合肝切除手术患者的一种替代治疗，单个肿瘤且直径小于4cm患者治疗结果往往最好，介入栓塞有一定姑息性治疗效果，放疗适合于有些手术断面有残癌或者术后复发患者，可以到医院找介入科医生评估，同时建议进行多学科联合会诊，制定一个综合诊治方案，从而获得更好的治疗效果
我哥哥肝癌中期，前两天做了介入手术，现在疼痛厉害怎么缓解？	术后疼痛缺乏特异性，可能由于肿瘤引起，可能由于介入术引起，如疼痛剧烈，建议到医院诊治，明确疼痛原因，对症治疗
我父亲是原发性肝癌一年做了三次介入治疗。想问一下正常可以做几次介入	介入次数取决于介入方式，肿瘤是否复发，治疗效果等个方面，对于无复发患者，往往只需要1次治疗，如果存在复发等情况，可能会进行数次介入治疗，能否进行介入治疗还取决于患者基本情况以及肿瘤进展情况，具体需要到介入科进行评估
我父亲是原发性肝癌一年做了三次介入治疗。想问一下正常可以做几次介入	介入次数取决于介入方式，肿瘤是否复发，治疗效果等个方面，对于无复发患者，往往只需要1次治疗，如果存在复发等情况，可能会进行数次介入治疗，能否进行介入治疗还取决于患者基本情况以及肿瘤进展情况，具体需要到介入科进行评估
问肝癌在介入治疗后忌吃什么？吃什么最好？	介入术后忌吃影响肝功能药物，可以适量补充蛋白质，具体摄入量和个人情况有关，建议到医院咨询医生
问肝癌在介入治疗后忌吃什么？吃什么最好？	介入术后忌吃影响肝功能药物，可以适量补充蛋白质
为什么大多数肝癌病人都要做介入治疗呢？	肝癌首选治疗是手术切除，通过对肝脏肿瘤切除达到治疗效果，对于不符合切除术的患者，可以选择非手术消融方法和全身治疗，治疗的选择取决于患者基础肝病的严重程度、肝内肿瘤的大小和分布、血供情况以及患者总体体能，肝癌的治疗需要多学科联合诊治，建议进行多学科会诊，制定个体化治疗方案，对于不可切除的肝癌，介入治疗往往是一个良好的代替治疗方法
为什么大多数肝癌病人都要做介入治疗呢？	肝癌首选治疗是手术切除，通过对肝脏肿瘤切除达到治疗效果，对于不符合切除术的患者，可以选择非手术消融方法和全身治疗，治疗的选择取决于患者基础肝病的严重程度、肝内肿瘤的大小和分布、血供情况以及患者总体体能，肝癌的治疗需要多学科联合诊治，建议进行多学科会诊，制定个体化治疗方案，对于不可切除的肝癌，介入治疗往往是一个良好的代替治疗方法
什么是肝脏肿瘤射频消融术？	射频消融术指对于病变处局部施以射频热能，使电极周围肿瘤细胞死亡，形成坏死区域，作为不符合肝切除手术患者的一种替代治疗，单个肿瘤且直径小于4cm患者治疗结果往往最好，该方法适用于瘤体较小而又不能或不适宜手术切除患者，特别是肝癌切除术后早期复发者，有点是安全、简便、创伤小、术后恢复快，有些患者消融术后治疗效果较好
什么是肝癌的介入治疗？包括哪些种类？是如何操作的？	介入治疗包括消融术，经动脉栓塞、化疗等，射频消融术指对于病变处局部施以射频热能，使电极周围肿瘤细胞死亡，形成坏死区域，作为不符合肝切除手术患者的一种替代治疗，单个肿瘤且直径小于4cm患者治疗结果往往最好，介入栓塞有一定姑息性治疗效果，放疗适合于有些手术断面有残癌或者术后复发患者，可以到医院找介入科医生评估，同时建议进行多学科联合会诊，制定一个综合诊治方案，从而获得更好的治疗效果
求助肝癌射频消融术效果好吗？	射频消融术指对于病变处局部施以射频热能，使电极周围肿瘤细胞死亡，形成坏死区域，作为不符合肝切除手术患者的一种替代治疗，单个肿瘤且直径小于4cm患者治疗结果往往最好，该方法适用于瘤体较小而又不能或不适宜手术切除患者，特别是肝癌切除术后早期复发者，有点是安全、简便、创伤小、术后恢复快，有些患者消融术后治疗效果较好
您好，请问肝癌介入治疗属于化疗	化疗分为局部栓塞化疗和全身化疗，介入治疗包括消融术，经动脉栓塞化疗、放疗等，射频消融术指对于病变处局部施以射频热能，使电极周围肿瘤细胞死亡，形成坏死区域，作为不符合肝切除手术患者的一种替代治疗，单个肿瘤且直径小于4cm患者治疗结果往往最好，介入栓塞有一定姑息性治疗效果，放疗适合于有些手术断面有残癌或者术后复发患者，可以到医院找介入科医生评估，同时建议进行多学科联合会诊，制定一个综合诊治方案，从而获得更好的治疗效果
你好！肝恶性肿瘤介入治疗过后要疼几天	患者病情不同，介入术不同，术后症状及持续时间也不尽相同，和肝癌切除术相比，术后疼痛往往较轻，恢复较快
弥漫性肝癌做介入效果好吗	介入治疗包括消融术，经动脉栓塞、化疗等，射频消融术指对于病变处局部施以射频热能，使电极周围肿瘤细胞死亡，形成坏死区域，作为不符合肝切除手术患者的一种替代治疗，单个肿瘤且直径小于4cm患者治疗结果往往最好，介入栓塞有一定姑息性治疗效果，放疗适合于有些手术断面有残癌或者术后复发患者，可以到医院找介入科医生评估，同时建议进行多学科联合会诊，制定一个综合诊治方案，从而获得更好的治疗效果
弥漫性肝癌适合做第三次介入治疗手术么？	介入次数取决于介入方式，肿瘤是否复发，治疗效果等个方面，对于无复发患者，往往只需要1次治疗，如果存在复发等情况，可能会进行数次介入治疗，能否进行介入治疗还取决于患者基本情况以及肿瘤进展情况，具体需要到介入科进行评估
漫画科普介入│肝癌最常用的治疗方案，为什么是它？	介入治疗包括消融术，经动脉栓塞、化疗等，射频消融术指对于病变处局部施以射频热能，使电极周围肿瘤细胞死亡，形成坏死区域，作为不符合肝切除手术患者的一种替代治疗，单个肿瘤且直径小于4cm患者治疗结果往往最好，介入栓塞有一定姑息性治疗效果，放疗适合于有些手术断面有残癌或者术后复发患者，不同介入方法其适应症也不一样，可以到医院找介入科医生评估，同时建议进行多学科联合会诊，制定一个综合诊治方案，从而获得更好的治疗效果
介入治疗肝癌有效果吗	介入治疗包括消融术，经动脉栓塞、化疗等，射频消融术指对于病变处局部施以射频热能，使电极周围肿瘤细胞死亡，形成坏死区域，作为不符合肝切除手术患者的一种替代治疗，单个肿瘤且直径小于4cm患者治疗结果往往最好，介入栓塞有一定姑息性治疗效果，放疗适合于有些手术断面有残癌或者术后复发患者，可以到医院找介入科医生评估，同时建议进行多学科联合会诊，制定一个综合诊治方案，从而获得更好的治疗效果
介入治疗肝癌后的保养	术后患者护理应听从医生安排，密切关注患者身体情况变化，及时反馈遇到的问题，建议多学科联合诊治，制定下一步治疗方案，同时遵医嘱，定期规律复查
介入治疗肝癌，能根治吗	肝癌介入术只能够消灭肉眼可见的肿瘤，可能会有肿瘤细胞残留，或者肿瘤恶性程度高，发生无法观察到的转移，因此肝癌术后存在复发可能
肝硬化做了一次介入手术确定是肝癌吗	肝癌的初步诊断依赖于临床医生基于患者症状、体征、血液学指标以及影像学资料，最终诊断依赖病理结果，介入治疗是治疗方式，不是诊断标准，如果是介入穿刺，则根据病理结果明确最终诊断
肝恶性肿瘤介入治疗属于几级手术？	消融手术属于三级手术，动脉化疗灌注属于二级手术
肝癌做完介入治疗后还可以再做切除手术吗	肝癌首选治疗是手术切除，对于不符合切除术的患者，可以选择介入和全身治疗，消融术瘤体适用于较小而又不能或不宜手术患者，经动脉栓塞为姑息性治疗，因此介入术后通常不再进行手术治疗，可以多学科联合诊治评估
肝癌做完介入手术后为什么还会疼	肝癌介入术后会出现腹部疼痛，可能由于手术引起，或者由肿瘤自身引起，如情况无改善，建议到医院就诊
肝癌做完介入后要注意什么？吃什么好，现在？	术后患者护理应听从医生安排，密切关注患者身体情况变化，及时反馈遇到的问题，建议多学科联合会诊，制定综合治疗方案，出院后遵医嘱定期复查，密切监测病情变化，术后应注意补充蛋白质，不同治疗方式对饮食要求不一样，遵从相关医嘱
肝癌做完介入后，不发烧也不疼痛，一点感觉都有，正常吗	患者病情不同，介入术不同，术后症状也不尽相同，术后可以没有任何症状
肝癌做了介入手术现在发现脾脏肿大是什么	肝癌脾肿大反映了基础肝功能较差，脾脏充血性肿大，建议到医院明确脾肿大原因进行诊治
肝癌做了介入手术后要怎么护理？	术后患者护理应听从医生安排，密切关注患者身体情况变化，及时反馈遇到的问题
肝癌做了介入手术，什么时候可以吃米饭，	不同介入术术后进食时间不同，通常术后第二天即可以逐渐过渡饮食，什么时候进普食根据根据手术情况及患者恢复情况而定，详细可以咨询介入医生
肝癌做了介入，以后需要吃什么药	术后用药听从医生安排，可能需要服用对症治疗药物和抗肿瘤药物
肝癌做介入治疗后肿瘤一定会变小吗？	不一定，对于行消融术患者，通常消融术后无肉眼可见肿瘤，对于动脉栓塞化疗患者，术后患者肿瘤往往缩小，对于放疗患者，有些肿瘤对放疗敏感，则会缩小，有些肿瘤对放疗不敏感，可能无明显效果
肝癌做介入能治愈吗	肝癌介入术只能够消灭肉眼可见的肿瘤，可能会有肿瘤细胞残留，或者肿瘤恶性程度高，发生无法观察到的转移，因此肝癌术后存在复发可能
肝癌做介入后有缩小还要继续做吗	对于姑息性治疗的患者，如效果较好，肿瘤进展缓慢，多次介入治疗后无明显获益，可以继续观察，如获益明显，建议继续治疗，肝癌的治疗是一个多学科联合诊治的过程，建议多学科诊治，根据情况制定下一步治疗方案
肝癌做过介入治疗后能活多久？	肝癌预后取决于患者肿瘤大小，部位，分期，治疗情况以及患者基本情况，不同治疗方式对某一特定患者疗效往往也不一样，因此建议多学科联合会诊，制定个体化治疗方案
肝癌做穿刺效果好吗？	肝脏穿刺的目的不同，诊断性穿刺通过穿刺活检，明确诊断，无治疗效果，作为非手术治疗的相关治疗依据；介入治疗包括消融术，经动脉栓塞、化疗等，射频消融术指对于病变处局部施以射频热能，使电极周围肿瘤细胞死亡，形成坏死区域，作为不符合肝切除手术患者的一种替代治疗，单个肿瘤且直径小于4cm患者治疗结果往往最好，介入栓塞有一定姑息性治疗效果，放疗适合于有些手术断面有残癌或者术后复发患者，可以到医院找介入科医生评估，同时建议进行多学科联合会诊，制定一个综合诊治方案，从而获得更好的治疗效果
肝癌中晚期做介入好还是保守好	肝癌首选治疗是手术切除，通过对肝脏肿瘤切除达到治疗效果，对于不符合切除术的患者，可以选择非手术消融方法和全身治疗，治疗的选择取决于患者基础肝病的严重程度、肝内肿瘤的大小和分布、血供情况以及患者总体体能，肝癌的治疗需要多学科联合诊治，建议进行多学科会诊，制定个体化治疗方案，对于不可切除的肝癌，介入治疗往往是一个良好的代替治疗方法
肝癌中晚期，肝部多发占位，医生建议做介入，可以吗	介入治疗包括消融术，经动脉栓塞、化疗等，射频消融术指对于病变处局部施以射频热能，使电极周围肿瘤细胞死亡，形成坏死区域，作为不符合肝切除手术患者的一种替代治疗，单个肿瘤且直径小于4cm患者治疗结果往往最好，介入栓塞有一定姑息性治疗效果，放疗适合于有些手术断面有残癌或者术后复发患者，可以到医院找介入科医生评估，同时建议进行多学科联合会诊，制定一个综合诊治方案，从而获得更好的治疗效果
肝癌怎么治疗效果好？	肝癌首选治疗是手术切除，通过对肝脏肿瘤切除达到治疗效果，对于不符合切除术的患者，可以选择非手术消融方法和全身治疗，治疗的选择取决于患者基础肝病的严重程度、肝内肿瘤的大小和分布、血供情况以及患者总体体能，肝癌的治疗需要多学科联合诊治，建议进行多学科会诊，制定个体化治疗方案，对于不可切除的肝癌，介入治疗往往是一个良好的代替治疗方法
肝癌早期做射频能根治吗？	肝癌介入术只能够消灭肉眼可见的肿瘤，可能会有肿瘤细胞残留，或者肿瘤恶性程度高，发生无法观察到的转移，因此肝癌术后存在复发可能
肝癌早期。是手术。还是做介入治疗	肝癌首选治疗是手术切除，对于不符合切除术的患者，可以选择非手术消融方法和全身治疗，治疗的选择取决于患者基础肝病的严重程度、肝内肿瘤的大小和分布、血供情况以及患者总体体能，建议到医院进行评估，多学科联合会诊诊治
肝癌想问下做手术好还是做介入好	肝癌首选治疗是手术切除，对于不符合切除术的患者，可以选择非手术消融方法和全身治疗，治疗的选择取决于患者基础肝病的严重程度、肝内肿瘤的大小和分布、血供情况以及患者总体体能，建议到医院进行评估，多学科联合会诊诊治
肝癌微波消融术后发烧正常吗	介入术后长时间出现发热症状，可能存在感染等情况，建议到行介入术的医院寻求诊治，明确病因，对症治疗
肝癌晚期做介入治疗和不做介入有多大区别	介入治疗包括消融术，经动脉栓塞、化疗等，射频消融术指对于病变处局部施以射频热能，使电极周围肿瘤细胞死亡，形成坏死区域，作为不符合肝切除手术患者的一种替代治疗，单个肿瘤且直径小于4cm患者治疗结果往往最好，介入栓塞有一定姑息性治疗效果，放疗适合于有些手术断面有残癌或者术后复发患者，可以到医院找介入科医生评估，同时建议进行多学科联合会诊，制定一个综合诊治方案，从而获得更好的治疗效果
肝癌晚期做介入有用吗	介入治疗包括消融术，经动脉栓塞、化疗等，射频消融术指对于病变处局部施以射频热能，使电极周围肿瘤细胞死亡，形成坏死区域，作为不符合肝切除手术患者的一种替代治疗，单个肿瘤且直径小于4cm患者治疗结果往往最好，介入栓塞有一定姑息性治疗效果，放疗适合于有些手术断面有残癌或者术后复发患者，可以到医院找介入科医生评估，同时建议进行多学科联合会诊，制定一个综合诊治方案，从而获得更好的治疗效果
肝癌晚期做介入好吗	肝癌介入治疗包括消融、经动脉化疗栓塞、放疗，治疗效果取决于多个方面，如肿瘤的大小、分期、肝功能等基本情况、治疗是否顺利、是否联合其他治疗等多个方面，对于不能行手术治疗的患者，介入治疗往往也可以获得一个较好的治疗效果
肝癌晚期怎么安乐死？	目前我国法律不允许安乐死
肝癌晚期能做几次介入治疗？	介入次数取决于介入方式，肿瘤是否复发，治疗效果等个方面，对于无复发患者，往往只需要1次治疗，如果存在复发等情况，可能会进行数次介入治疗，能否进行介入治疗还取决于患者基本情况以及肿瘤进展情况，具体需要到介入科进行评估
肝癌晚期能做放疗和介入治疗吗	介入治疗包括消融术，经动脉栓塞、化疗等，射频消融术指对于病变处局部施以射频热能，使电极周围肿瘤细胞死亡，形成坏死区域，作为不符合肝切除手术患者的一种替代治疗，单个肿瘤且直径小于5cm患者治疗结果往往最好，介入栓塞有一定姑息性治疗效果，放疗适合于有些手术断面有残癌或者术后复发患者，可以到医院找介入科医生评估，同时建议进行多学科联合会诊，制定一个综合诊治方案，从而获得更好的治疗效果
肝癌晚期能活多久做介入治疗能有多大效	介入治疗包括消融术，经动脉栓塞、化疗等，射频消融术指对于病变处局部施以射频热能，使电极周围肿瘤细胞死亡，形成坏死区域，作为不符合肝切除手术患者的一种替代治疗，单个肿瘤且直径小于4cm患者治疗结果往往最好，介入栓塞有一定姑息性治疗效果，放疗适合于有些手术断面有残癌或者术后复发患者，可以到医院找介入科医生评估，同时建议进行多学科联合会诊，制定一个综合诊治方案，从而获得更好的治疗效果
肝癌晚期可以用介入手术吗	介入治疗包括消融术，经动脉栓塞、化疗等，射频消融术指对于病变处局部施以射频热能，使电极周围肿瘤细胞死亡，形成坏死区域，作为不符合肝切除手术患者的一种替代治疗，单个肿瘤且直径小于4cm患者治疗结果往往最好，介入栓塞有一定姑息性治疗效果，放疗适合于有些手术断面有残癌或者术后复发患者，可以到医院找介入科医生评估，同时建议进行多学科联合会诊，制定一个综合诊治方案，从而获得更好的治疗效果
肝癌晚期介入治疗效果好吗?	肝癌介入治疗包括消融、经动脉化疗栓塞、放疗，治疗效果取决于多个方面，如肿瘤的大小、分期、肝功能等基本情况、治疗是否顺利、是否联合其他治疗等多个方面，对于不能行手术治疗的患者，介入治疗往往也可以获得一个较好的治疗效果
肝癌晚期腹水做介入有用吗？	腹水产生原因是腹膜后受浸润、门静脉受压、门静脉或肝静脉内癌栓形成以及合并肝硬化等因，对于由于肝癌引起的腹水，首先要明确病因，针对病因进行治疗，通常对症治疗方式为应用利尿剂治疗
肝癌晚期病合适做电疗	射频消融术指对于病变处局部施以射频热能，使电极周围肿瘤细胞死亡，形成坏死区域，作为不符合肝切除手术患者的一种替代治疗，单个肿瘤且直径小于4cm患者治疗结果往往最好，该方法适用于瘤体较小而又不能或不适宜手术切除患者，特别是肝癌切除术后早期复发者，有点是安全、简便、创伤小、术后恢复快，有些患者消融术后治疗效果较好
肝癌晚期，就想知道做介入风险有多少？	介入治疗和肝癌手术相比，术后恢复相对较快，症状相对较轻，术后并发症概率相对较低
肝癌栓塞是什么意思	肝细胞癌的血供主要来源于肝动脉，因此人们开发了断绝肿瘤血供的技术，包括微球栓塞或直接向滋养肿瘤的肝动脉分支注入细胞化疗药物，从而达到治疗效果，即经股动脉做超选择插管至肝动脉，注入栓塞剂及抗癌药，达到姑息性治疗效果
肝癌术后为什么要做介入治疗?	介入治疗包括消融术，经动脉栓塞、化疗等，射频消融术指对于病变处局部施以射频热能，使电极周围肿瘤细胞死亡，形成坏死区域，作为不符合肝切除手术患者的一种替代治疗，单个肿瘤且直径小于4cm患者治疗结果往往最好，介入栓塞有一定姑息性治疗效果，放疗适合于有些手术断面有残癌或者术后复发患者，不同手术拥有不同指征，满足相应指征的患者接受介入手术后可以获益，可以到医院找介入科医生评估，同时建议进行多学科联合会诊，制定一个综合诊治方案，从而获得更好的治疗效果
肝癌术后九个月复发做介入冶疗合适吗	介入治疗包括消融术，经动脉栓塞、化疗等，射频消融术指对于病变处局部施以射频热能，使电极周围肿瘤细胞死亡，形成坏死区域，作为不符合肝切除手术患者的一种替代治疗，单个肿瘤且直径小于4cm患者治疗结果往往最好，介入栓塞有一定姑息性治疗效果，放疗适合于有些手术断面有残癌或者术后复发患者，不同手术拥有不同指征，满足相应指征的患者接受介入手术后可以获益，可以到医院找介入科医生评估，同时建议进行多学科联合会诊，制定一个综合诊治方案，从而获得更好的治疗效果
肝癌手术后需要进行介入吗	介入治疗包括消融术，经动脉栓塞、化疗等，射频消融术指对于病变处局部施以射频热能，使电极周围肿瘤细胞死亡，形成坏死区域，作为不符合肝切除手术患者的一种替代治疗，单个肿瘤且直径小于4cm患者治疗结果往往最好，介入栓塞有一定姑息性治疗效果，放疗适合于有些手术断面有残癌或者术后复发患者，不同手术拥有不同指征，满足相应指征的患者接受介入手术后可以获益，可以到医院找介入科医生评估，同时建议进行多学科联合会诊，制定一个综合诊治方案，从而获得更好的治疗效果
肝癌手术后是否一定要介入治疗，具体要几天	不一定，介入治疗包括消融术，经动脉栓塞、化疗等，射频消融术指对于病变处局部施以射频热能，使电极周围肿瘤细胞死亡，形成坏死区域，作为不符合肝切除手术患者的一种替代治疗，单个肿瘤且直径小于4cm患者治疗结果往往最好，介入栓塞有一定姑息性治疗效果，放疗适合于有些手术断面有残癌或者术后复发患者，不同的介入方式适合不同的患者，可以到医院找介入科医生评估，同时建议进行多学科联合会诊，制定一个综合诊治方案，从而获得更好的治疗效果
肝癌手术后，还需要做介入治疗吗？	不一定，介入治疗包括消融术，经动脉栓塞、化疗等，射频消融术指对于病变处局部施以射频热能，使电极周围肿瘤细胞死亡，形成坏死区域，作为不符合肝切除手术患者的一种替代治疗，单个肿瘤且直径小于5cm患者治疗结果往往最好，介入栓塞有一定姑息性治疗效果，放疗适合于有些手术断面有残癌或者术后复发患者，不同的介入方式适合不同的患者，可以到医院找介入科医生评估，同时建议进行多学科联合会诊，制定一个综合诊治方案，从而获得更好的治疗效果
肝癌是开刀好还是介入好？	肝癌首选治疗是手术切除，通过对肝脏肿瘤切除达到治疗效果，对于不符合切除术的患者，可以选择非手术消融方法和全身治疗，治疗的选择取决于患者基础肝病的严重程度、肝内肿瘤的大小和分布、血供情况以及患者总体体能，肝癌的治疗需要多学科联合诊治，建议进行多学科会诊，制定个体化治疗方案，对于不可切除的肝癌，介入治疗往往是一个良好的代替治疗方法
肝癌射频消融术能根除吗	肝癌介入术只能够消灭肉眼可见的肿瘤，可能会有肿瘤细胞残留，或者肿瘤恶性程度高，发生无法观察到的转移，因此肝癌术后存在复发可能
肝癌射频消融术后注意事项	术后患者护理应听从医生安排，密切关注患者身体情况变化，及时反馈遇到的问题，建议多学科联合会诊，制定综合治疗方案，出院后遵医嘱定期复查，密切监测病情变化
肝癌破裂出血介入后能活多久	肝癌预后取决于患者肿瘤大小，部位，分期，治疗情况以及患者基本情况，不同治疗方式对某一特定患者疗效往往也不一样，因此建议多学科联合会诊，制定个体化治疗方案
肝癌能做介入治疗吗？	介入治疗包括消融术，经动脉栓塞、化疗等，射频消融术指对于病变处局部施以射频热能，使电极周围肿瘤细胞死亡，形成坏死区域，作为不符合肝切除手术患者的一种替代治疗，单个肿瘤且直径小于4cm患者治疗结果往往最好，介入栓塞有一定姑息性治疗效果，放疗适合于有些手术断面有残癌或者术后复发患者，可以到医院找介入科医生评估，同时建议进行多学科联合会诊，制定一个综合诊治方案，从而获得更好的治疗效果
肝癌冷冻治疗怎么样?	对于原发性肝脏肿瘤，大多数医院往往倾向于使用并发症发生率低的消融方式，如射频消融，仅有少数医疗机构进行冷冻消融术，作为局部热损伤并发症可能性较高的肿瘤射频消融的替代疗法，建议到医院进行多学科联合诊治，制定个体化治疗方案
肝癌扩散后还能做介入吗？	介入治疗包括消融术，经动脉栓塞、化疗等，射频消融术指对于病变处局部施以射频热能，使电极周围肿瘤细胞死亡，形成坏死区域，作为不符合肝切除手术患者的一种替代治疗，单个肿瘤且直径小于4cm患者治疗结果往往最好，介入栓塞有一定姑息性治疗效果，放疗适合于有些手术断面有残癌或者术后复发患者，不同介入方法其适应症也不一样，可以到医院找介入科医生评估，同时建议进行多学科联合会诊，制定一个综合诊治方案，从而获得更好的治疗效果
肝癌介入做一次就行吗？	不一定，介入次数取决于介入方式，肿瘤是否复发，治疗效果等个方面，对于无复发患者，往往只需要1次治疗，如果存在复发等情况，可能会进行数次介入治疗，能否进行介入治疗还取决于患者基本情况以及肿瘤进展情况，具体需要到介入科进行评估
肝癌介入做完一直腹胀怎么办	腹胀可能由于腹水、肝癌引起的胃肠功能紊乱等因素引起，腹胀症状往往缺乏特异性，建议到医院进行就诊，明确病因，对症治疗
肝癌介入治疗怎么做？	介入治疗包括消融术，经动脉栓塞、化疗等，射频消融术指对于病变处局部施以射频热能，使电极周围肿瘤细胞死亡，形成坏死区域，作为不符合肝切除手术患者的一种替代治疗，单个肿瘤且直径小于4cm患者治疗结果往往最好，介入栓塞有一定姑息性治疗效果，放疗适合于有些手术断面有残癌或者术后复发患者，可以到医院找介入科医生评估，同时建议进行多学科联合会诊，制定一个综合诊治方案，从而获得更好的治疗效果
肝癌介入治疗一般要做几次?	介入次数取决于介入方式，肿瘤是否复发，治疗效果等个方面，对于无复发患者，往往只需要1次治疗，如果存在复发等情况，可能会进行数次介入治疗，能否进行介入治疗还取决于患者基本情况以及肿瘤进展情况，具体需要到介入科进行评估
肝癌介入治疗一般要做几次	介入次数取决于介入方式，肿瘤是否复发，治疗效果等个方面，对于无复发患者，往往只需要1次治疗，如果存在复发等情况，可能会进行数次介入治疗，能否进行介入治疗还取决于患者基本情况以及肿瘤进展情况，具体需要到介入科进行评估
肝癌介入治疗效果好吗？	介入治疗包括消融术，经动脉栓塞、化疗等，射频消融术指对于病变处局部施以射频热能，使电极周围肿瘤细胞死亡，形成坏死区域，作为不符合肝切除手术患者的一种替代治疗，单个肿瘤且直径小于4cm患者治疗结果往往最好，介入栓塞有一定姑息性治疗效果，放疗适合于有些手术断面有残癌或者术后复发患者，可以到医院找介入科医生评估，同时建议进行多学科联合会诊，制定一个综合诊治方案，从而获得更好的治疗效果
肝癌介入治疗是什么意思	介入治疗包括消融术，经动脉栓塞、化疗等，射频消融术指对于病变处局部施以射频热能，使电极周围肿瘤细胞死亡，形成坏死区域，作为不符合肝切除手术患者的一种替代治疗，单个肿瘤且直径小于4cm患者治疗结果往往最好，介入栓塞有一定姑息性治疗效果，放疗适合于有些手术断面有残癌或者术后复发患者，可以到医院找介入科医生评估，同时建议进行多学科联合会诊，制定一个综合诊治方案，从而获得更好的治疗效果
肝癌介入治疗能活2年吗？	肝癌预后取决于患者肿瘤大小，部位，分期，治疗情况以及患者基本情况，不同治疗方式对某一特定患者疗效往往也不一样，因此建议多学科联合会诊，制定个体化治疗方案
肝癌介入治疗能根治吗?	肝癌介入术只能够消灭肉眼可见的肿瘤，可能会有肿瘤细胞残留，或者肿瘤恶性程度高，发生无法观察到的转移，因此肝癌介入后存在复发可能，建议多学科联合会诊，制定下一步治疗方案
肝癌介入治疗会脱发吗？	应用某些化疗药物可能引起脱发，同时机体对化疗药物敏感程度也不同，具体可咨询介入医生
肝癌介入治疗后肿瘤长了三个是怎么回事啊?	肝癌介入术只能够消灭肉眼可见的肿瘤，可能会有肿瘤细胞残留，或者肿瘤恶性程度高，发生无法观察到的转移，因此肝癌介入后存在复发可能，出现相关情况建议多学科联合会诊，制定下一步治疗方案
肝癌介入治疗后肿瘤会缩小吗？	介入治疗包括消融术，经动脉栓塞、化疗等，射频消融术指对于病变处局部施以射频热能，使电极周围肿瘤细胞死亡，形成坏死区域，作为不符合肝切除手术患者的一种替代治疗，单个肿瘤且直径小于4cm患者治疗结果往往最好，介入栓塞有一定姑息性治疗效果，放疗适合于有些手术断面有残癌或者术后复发患者，可以到医院找介入科医生评估，同时建议进行多学科联合会诊，制定一个综合诊治方案，从而获得更好的治疗效果
肝癌介入治疗后要化疗吗？	化疗是肝癌的一种重要治疗方式，建议到肿瘤内科进行评估诊治，肝癌的治疗需要多学科联合治疗，建议多学科会诊，制定个体化治疗方案
肝癌介入治疗后脚肿了怎么办	术后水肿往往缺乏特异性，如出现水肿情况，且症状无好转，建议到医院就诊，明确病因，对症治疗
肝癌介入治疗后很长时间仍然发高烧是正常现象吧	介入术后长时间出现发热症状，可能存在感染等情况，建议到行介入术的医院寻求诊治，明确病因，对症治疗
肝癌介入治疗后肝区疼是怎么回事	腹痛症状往往没有特异性，可能由于肿瘤引起，也可能由于手术相关引起，肝癌介入术后可能会有腹部不适，如情况无改善，建议到医院就诊，明确病因，对症治疗
肝癌介入治疗后发烧是好事吗	介入术后长时间出现发热症状，可能存在感染等情况，建议到行介入术的医院寻求诊治，明确病因，对症治疗
肝癌介入治疗后发烧十五天了怎么办？	介入术后长时间出现发热症状，可能存在感染等情况，建议到行介入术的医院寻求诊治，明确病因，对症治疗
肝癌介入治疗后发烧十五天了怎么办	介入术后长时间出现发热症状，可能存在感染等情况，建议到行介入术的医院寻求诊治，明确病因，对症治疗
肝癌介入治疗后发热是怎么回事	介入术后长时间出现发热症状，可能存在感染等情况，建议到行介入术的医院寻求诊治，明确病因，对症治疗
肝癌介入治疗后多长时间会复发	是否复发取决于肿瘤分级，有无转移，患者基本情况以及治疗效果等等，对于不同患者，复发往往是不可预测的，建议多学科联合治疗，降低复发风险，同时定期规律复查，发现复发及早治疗
肝癌介入治疗后出现肝腹水是不是病情加重?	腹水产生原因是腹膜后受浸润、门静脉受压、门静脉或肝静脉内癌栓形成以及合并肝硬化等因，对于由于肝癌引起的腹水，首先要明确病因，针对病因进行治疗，通常对症治疗方式为应用利尿剂治疗
肝癌介入治疗后出现肝腹水是不是病情加重	腹水产生原因是腹膜后受浸润、门静脉受压、门静脉或肝静脉内癌栓形成以及合并肝硬化等因，对于由于肝癌引起的腹水，首先要明确病因，针对病因进行治疗，通常对症治疗方式为应用利尿剂治疗，肝癌引起腹水常提示疾病进展
肝癌介入治疗费用要多少？贵吗？	介入治疗费用取决于介入方式以及所用药物，同时各地区情况也不尽相同
肝癌介入治疗的效果好吗？	介入治疗包括消融术，经动脉栓塞、化疗等，射频消融术指对于病变处局部施以射频热能，使电极周围肿瘤细胞死亡，形成坏死区域，作为不符合肝切除手术患者的一种替代治疗，单个肿瘤且直径小于4cm患者治疗结果往往最好，介入栓塞有一定姑息性治疗效果，放疗适合于有些手术断面有残癌或者术后复发患者，可以到医院找介入科医生评估，同时建议进行多学科联合会诊，制定一个综合诊治方案，从而获得更好的治疗效果
肝癌介入治疗的常用药物	经动脉栓塞向肝动脉注射化疗药物，有时会加碘油或者促凝物质
肝癌介入痛苦几天？	患者病情不同，介入术不同，术后症状及持续时间也不尽相同，和肝癌切除术相比，术后疼痛往往较轻，恢复较快
肝癌介入术有哪些不良反应？有没有办法处理？	介入术后会出现腹痛，腹胀，发热等不适，通常到医院对症处理后可缓解
肝癌介入术后应当复查些什么？什么时间查？	通常复查血常规、血生化、凝血、甲胎蛋白以及影像学检查，复查时间遵医嘱，一般3个月左右
肝癌介入手术原理是什么？	肝癌介入治疗包括消融、经动脉化疗栓塞、放疗，射频消融术指对于病变处局部施以射频热能，使电极周围肿瘤细胞死亡，形成坏死区域，肝细胞癌的血供主要来源于肝动脉，因此人们开发了断绝肿瘤血供的技术，包括微球栓塞或直接向滋养肿瘤的肝动脉分支注入细胞化疗药物，从而达到治疗效果；放疗是通过放射线破坏肿瘤细胞或血供，从而达到治疗目的
肝癌介入手术有风险吗？	介入治疗和肝癌手术相比，术后恢复相对较快，症状相对较轻，术后并发症概率相对较低
肝癌介入手术一般做几次	不一定，介入次数取决于介入方式，肿瘤是否复发，治疗效果等个方面，对于无复发患者，往往只需要1次治疗，如果存在复发等情况，可能会进行数次介入治疗，能否进行介入治疗还取决于患者基本情况以及肿瘤进展情况，具体需要到介入科进行评估
肝癌介入手术是怎么回事？	介入治疗包括消融术，经动脉栓塞、放疗等，射频消融术指对于病变处局部施以射频热能，使电极周围肿瘤细胞死亡，形成坏死区域，作为不符合肝切除手术患者的一种替代治疗，单个肿瘤且直径小于4cm患者治疗结果往往最好，介入栓塞有一定姑息性治疗效果，放疗适合于有些手术断面有残癌或者术后复发患者，介入治疗拥有各自的适应症，可以到医院找介入科医生评估，同时建议进行多学科联合会诊，制定一个综合诊治方案，从而获得更好的治疗效果
肝癌介入手术后引起手关节痛可用什么药缓解	关节痛不是介入术后常见症状，建议到专科诊治，明确病因，进行病因治疗和对症治疗
肝癌介入手术后需要复查挂肝病内科还是介入科	肝癌的治疗是一个多学科联合诊治的过程，建议多学科诊治，根据情况制定下一步治疗方案，如出现术后并发症，建议到介入科就诊，如出现复发等情况，建议多学科联合会诊，制定方案
肝癌介入手术后腹胀怎么办？	腹胀可能由于腹水、肝癌引起的胃肠功能紊乱等因素引起，腹胀症状往往缺乏特异性，建议到医院进行就诊，明确病因，对症治疗
肝癌介入手术后腹胀怎么办	腹胀可能由于腹水、肝癌引起的胃肠功能紊乱等因素引起，腹胀症状往往缺乏特异性，建议到医院进行就诊，明确病因，对症治疗
肝癌介入手术后发烧好不好？	介入术后长时间出现发热症状，可能存在感染等情况，建议到行介入术的医院寻求诊治，明确病因，对症治疗
肝癌介入手术后吃什么？	介入术后忌吃影响肝功能药物，可以适量补充蛋白质，具体摄入量和个人情况有关，建议到医院咨询医生
肝癌介入手术后便秘怎么办？	术后未排便，可能与术后未进食或流质饮食有关，也可能患者肠道功能紊乱等原因，建议到行介入术的医院进行诊治，明确病因，对症治疗
肝癌介入手术后靶向药好吗？	靶向治疗是肝癌的一种重要治疗方式，建议到肿瘤内科进行评估诊治，同时建议多学科联合会诊，制定一个个体化诊疗方案
肝癌介入能做几次	介入次数取决于介入方式，肿瘤是否复发，治疗效果等个方面，对于无复发患者，往往只需要1次治疗，如果存在复发等情况，可能会进行数次介入治疗，能否进行介入治疗还取决于患者基本情况以及肿瘤进展情况，具体需要到介入科进行评估
肝癌介入后住院几天出院？	肝癌介入术后恢复往往较快，如无严重并发症，术后各项指标恢复良好，通常一周以内可以出院
肝癌介入后脱发后续需要注意哪些地方？	脱发往往不是需要密切关注的情况，肝癌介入术后注意定期到医院复查，进行多学科会诊制定个体化治疗方案治疗方案
肝癌介入后全身总爱疼痛是怎么回事	疼痛症状往往没有特异性，可能由于肿瘤引起，也可能由于手术相关引起，肝癌介入术后可能会有腹部不适，如情况无改善，建议到医院就诊，明确病因，对症治疗
肝癌介入后能活多久？	肝癌预后取决于患者肿瘤大小，部位，分期，治疗情况以及患者基本情况，不同治疗方式对某一特定患者疗效往往也不一样，因此建议多学科联合会诊，制定个体化治疗方案
肝癌介入后多久可以下床？	下地时间取决于患者基本情况，介入方式等，通常3天内即可下地，具体时间听从医生安排
肝癌介入后低烧，便秘怎么办/要注意些什么？	腹胀可能由于腹水、肝癌引起的胃肠功能紊乱等因素引起，腹胀症状往往缺乏特异性，建议到医院进行就诊，明确病因，对症治疗
肝癌介入后吃什么中药？	中医中药治疗肝癌，临床上多与其他疗法配合用，对保护或改善肝功能、减轻不良反应、提高免疫力有一定作用，可以到相关专科就诊咨询，同时建议定期复查肝功能
肝癌介入和消融哪个好？	介入治疗包括消融术，经动脉栓塞、化疗等，射频消融术指对于病变处局部施以射频热能，使电极周围肿瘤细胞死亡，形成坏死区域，作为不符合肝切除手术患者的一种替代治疗，单个肿瘤且直径小于4cm患者治疗结果往往最好，介入栓塞有一定姑息性治疗效果，放疗适合于有些手术断面有残癌或者术后复发患者，可以到医院找介入科医生评估，同时建议进行多学科联合会诊，制定一个综合诊治方案，从而获得更好的治疗效果
肝癌患者做完介入有什么后果和反应？	肝癌介入术后症状及并发症发生概率往往较低，如出现相关症状建议到医院进行对症治疗，介入术后肿瘤可能复发，需要进一步治疗，建议多学科联合诊治，制定个体化治疗方案
肝癌腹水可以做介入治疗吗	腹水产生原因是腹膜后受浸润、门静脉受压、门静脉或肝静脉内癌栓形成以及合并肝硬化等因，对于由于肝癌引起的腹水，首先要明确病因，针对病因进行治疗，通常对症治疗方式为应用利尿剂治疗
肝癌放疗适应症	放疗特异作用尚不明确，对于症状较重，不适合其他治疗方式患者，可以尝试放疗，建议到医院进行多学科联合会诊，制定个体化治疗方案
肝癌的针灸治疗	通常来说，中医不是肝癌的常见治疗手段，中医中药治疗肝癌，临床上多与其他疗法配合用，对保护或改善肝功能、减轻不良反应、提高免疫力有一定作用，可以到相关专科就诊咨询，同时建议定期复查肝功能
肝癌的射频治疗	射频消融术指对于病变处局部施以射频热能，使电极周围肿瘤细胞死亡，形成坏死区域，作为不符合肝切除手术患者的一种替代治疗，单个肿瘤且直径小于4cm患者治疗结果往往最好，该方法适用于瘤体较小而又不能或不适宜手术切除患者，特别是肝癌切除术后早期复发者，有点是安全、简便、创伤小、术后恢复快，有些患者消融术后治疗效果较好
肝癌的射频治疗	射频消融术指对于病变处局部施以射频热能，使电极周围肿瘤细胞死亡，形成坏死区域，作为不符合肝切除手术患者的一种替代治疗，单个肿瘤且直径小于4cm患者治疗结果往往最好，该方法适用于瘤体较小而又不能或不适宜手术切除患者，特别是肝癌切除术后早期复发者，有点是安全、简便、创伤小、术后恢复快，有些患者消融术后治疗效果较好
肝癌的射频消融容易复发吗？	肝癌介入术只能够消灭肉眼可见的肿瘤，可能会有肿瘤细胞残留，或者肿瘤恶性程度高，发生无法观察到的转移，因此肝癌术后存在复发可能，是否容易复发取决于肿瘤分期，是否有血管侵犯，肝功能以及治疗情况
肝癌的介入治疗痛苦吗?	介入治疗和肝癌手术相比，术后恢复相对较快，症状相对较轻，术后并发症概率相对较低
肝癌的介入治疗痛苦吗?	介入治疗和肝癌手术相比，术后恢复相对较快，症状相对较轻，术后并发症概率相对较低
肝癌的介入治疗痛苦吗	介入治疗和肝癌手术相比，术后恢复相对较快，症状相对较轻，术后并发症概率相对较低
肝癌的介入治疗痛苦吗	介入治疗和肝癌手术相比，术后恢复相对较快，症状相对较轻，术后并发症概率相对较低
87岁老人，患肝癌晚期怎么治疗	肝癌首选治疗是手术切除，对于不符合切除术的患者，可以选择非手术消融方法和全身治疗，治疗的选择取决于患者基础肝病的严重程度、肝内肿瘤的大小和分布、血供情况以及患者总体体能，建议到医院进行评估，多学科联合会诊诊治
肝癌的药物治疗	回答
做肝癌化疗有哪些副作用？	任何癌症做化疗都有不良反应，包括恶心呕吐，食欲差，脱发，骨髓抑制等。使用不同的药物，不良反应会稍有不同。目前处理不良反应的药物也很多，只要病人体质可以，大多数人都能耐受化疗。
中医治疗肝癌的效果怎么样？	肝癌的治疗首选是手术治疗，对于无法手术的患者可以考虑介入或者放化疗，中医主要用于辅助治疗肝癌，提高机体免疫力，改善全身症状。
中医治疗胆管癌效果怎么样？	胆管癌的治疗首选是手术治疗，对于无法手术的患者可以考虑介入或者放化疗，中医主要用于辅助治疗肝癌，提高机体免疫力，改善全身症状。建议咨询专科门诊
中医针灸能治疗肝癌吗	针灸无法治疗肝癌，但是可以用来改善症状。肝癌的治疗首选是手术治疗，对于无法手术的患者可以考虑介入或者放化疗，中医主要用于辅助治疗肝癌，提高机体免疫力，改善全身症状。针灸
中医对治疗肝癌晚期有效果吗?	肝癌的治疗首选是手术治疗，对于无法手术的患者可以考虑介入或者放化疗，中医主要用于辅助治疗肝癌，提高机体免疫力，改善全身症状。具体推荐请至中医门诊咨询。
中药治疗肝癌效果怎么样优质推荐？	肝癌的治疗首选是手术治疗，对于无法手术的患者可以考虑介入或者放化疗，中医主要用于辅助治疗肝癌，提高机体免疫力，改善全身症状。具体推荐请至中医门诊咨询。
中药能治愈肝癌吗	肝癌的治疗首选是手术治疗，对于无法手术的患者可以考虑介入或者放化疗，中医主要用于辅助治疗肝癌，提高机体免疫力，改善全身症状。具体推荐请至中医门诊咨询。
中药能治肝癌吗	肝癌的治疗首选是手术治疗，对于无法手术的患者可以考虑介入或者放化疗，中医主要用于辅助治疗肝癌，提高机体免疫力，改善全身症状。具体推荐请至中医门诊咨询。
中年男性49肝上长有少量血管瘤吃护肝片好还是角鲨烯	血管瘤是良性肿瘤，一般来说如果血管瘤如果未达到手术指证的话可以不用处理，有少量血管瘤，需要根据血管瘤的大小、位置来进行判断是否需要处理，目前最有效的方法是手术治疗，如果血管瘤的生长未影响到肝脏功能的话可以不用处理。您可以去正规医院咨询门诊医生
治疗直肠癌肝转移用什么纯中药好？	使用中医治疗主要是对症治疗及放化疗的辅助治疗，具体什么中药需要根据患者的具体状况，咨询中医科的医生。
治疗肝癌晚期民间草药	使用中医治疗主要是对症治疗及放化疗的辅助治疗，具体什么中药需要根据患者的具体状况，咨询中医科的医生。
治疗肝癌晚期的中药有哪些？	使用中医治疗主要是对症治疗及放化疗的辅助治疗，具体什么中药需要根据患者的具体状况，咨询中医科的医生。
治疗肝癌晚期的药有哪些	使用中医治疗主要是对症治疗及放化疗的辅助治疗，具体什么中药需要根据患者的具体状况，咨询中医科的医生。
治疗肝癌的中药有哪些	使用中医治疗主要是对症治疗及放化疗的辅助治疗，具体什么中药需要根据患者的具体状况，咨询中医科的医生。
治疗肝癌的中成药有哪些？	使用中医治疗主要是对症治疗及放化疗的辅助治疗，具体什么中药需要根据患者的具体状况，咨询中医科的医生。
治疗肝癌的靶向药是什么 ?	靶向治疗是指以标准化的生物标记物来识别是否存在某种疾病特定的控制肿瘤生长的基因或基因谱，以此确定针对特异性靶点的治疗方法。常用药物有索拉非尼，乐伐替尼
治肝癌最好中药？	使用中医治疗主要是对症治疗及放化疗的辅助治疗，具体吃多久的中药需要根据患者的具体状况，咨询中医科的医生。
治肝癌的中药秘方？	使用中医治疗主要是对症治疗及放化疗的辅助治疗，具体吃多久的中药需要根据患者的具体状况，咨询中医科的医生。
早期小肝癌手术后需要化疗吗	早期肝癌手术之后，是否是需要进行化疗，还是需要结合临床的情况来判断。那么如果不需要进行化疗的话，后期定期进行复查就可以了。具体的需要根据主治医生的意见，结合病理情况判断。
早期肝癌怎样保守治疗	肝癌早期的话，应该会生存期更久的，首选治疗采取手术治疗。对于无法手术的患者可以考虑介入、或者放化疗等其他治疗措施。
早期肝癌术后还须做化疗吗	肝癌手术之后，是否是需要进行化疗，还是需要结合临床的情况来判断。那么如果不需要进行化疗的话，后期定期进行复查就可以了。具体的需要根据主治医生的意见，结合病理情况判断。
早期肝癌手术后吃什么药防复发	肝癌防复发一是看是什么引起的肝癌，二是看切除术后的病理切片，三是看多久定期复查一次复查哪些项目。确定原因后再就诊于专科门诊进行治疗
原发性肝癌服用熊胆粉能治愈吗，我现在正在服用	熊胆粉有保肝、利胆溶石的作用，能在一定程度上缓解肝癌的黄疸症状，并无直接治疗肝癌的效果，建议去正规医院就诊，遵从医嘱治疗。
原发性肝癌的放射治疗	放射治疗是指放射治疗，化疗是指化学药物。对于恶性肿瘤，有些对化疗更敏感，有些对放疗更敏感。放疗或化疗不能一概而论，但放疗和化疗会产生一些副作用。建议同时服用抗癌中药，避免疾病过度恶化。患者能保持良好的心态，积极配合医生的治疗。
原发性肝癌吃什么药？	首选手术治疗，对于无法手术治疗的患者可以考虑以全身性的治疗方式，如化疗、生物免疫治疗，靶向药物治疗等等。
原发性肝癌，医生说不宜动手术应该怎么治疗还能治好吗	首选手术治疗，对于无法手术治疗的患者可以考虑以全身性的治疗方式，如化疗、生物免疫治疗，靶向药物治疗等等，建议去正规医院就诊，根据个人具体病情制定治疗方案。
有什么中药可以控制肝癌？	使用中医治疗主要是对症治疗及放化疗的辅助治疗，具体吃多久的中药需要根据患者的具体状况，咨询中医科的医生。
有没有治疗肝癌晚期的偏方	肝癌的治疗最主要的还是通过手术的方式来切除病变部位，药物的治疗主要是起到辅助的效果，并杀死其余的癌细胞，常见的药物有一大类就是化疗药，如铂类、氟尿嘧啶、蒽环类药物。另一类是靶向药，现在主要是索拉非尼，它可以抑制肿瘤的生长，也可以抑制肿瘤新生血管的形成
有没有什么治疗肝癌最好的药物	没有最好的药物，需要根据患者自身病情，身体状况及基因检测结果进行判断。具体需要咨询专科门诊。
乙肝肝癌患者可以吃东阿阿胶进行补血吗？	乙肝肝癌患者大多存在肝硬化，也可能存在血小板减少、低白蛋白血症、高胆红素血症和低凝血酶原血症，患者常有血红蛋白低，这通常因为肿瘤的其他效应而存在贫血。可以根据患者的贫血状况适当使用东阿阿胶，建议具体情况咨询中医专科医生。
乙肝多年现为肝癌准备化疗有用吗	肝癌的治疗最主要的还是通过手术的方式来切除病变部位，药物的治疗主要是起到辅助的效果，并杀死其余的癌细胞，常见的药物有一大类就是化疗药，如铂类、氟尿嘧啶、蒽环类药物。另一类是靶向药，现在主要是索拉非尼，它可以抑制肿瘤的生长，也可以抑制肿瘤新生血管的形成
胰头癌的中医治疗好处	胰头癌的治疗最主要的还是通过手术的方式来切除病变部位，药物的治疗主要是起到辅助的效果，并杀死其余的癌细胞。中医一般用来辅助治疗，改善症状。具体需咨询中医科门诊。
熊胆能治肝癌吗？	不能，熊胆粉为天然品，主作用护肝利胆，功效综合，疗效广。熊胆是可以用于治疗肝相关疾病，并无治疗肿瘤的效果
小肝癌治疗后需要化疗么？	早期肝癌手术之后，是否是需要进行化疗，还是需要结合临床的情况来判断。那么如果不需要进行化疗的话，后期定期进行复查就可以了。具体的需要根据主治医生的意见，结合病理情况判断。
小肝癌患者服用槐耳颗粒有效吗	槐耳颗粒为原发性肝癌不宜手术和化疗者辅助治疗用药，有改善肝区疼痛、腹胀、乏力等症状的作用。具体使用效果请咨询肿瘤科医生。
现在有治疗肝癌的药没有？	肝癌的治疗最主要的还是通过手术的方式来切除病变部位，药物的治疗主要是起到辅助的效果，并杀死其余的癌细胞，常见的药物有一大类就是化疗药，如铂类、氟尿嘧啶、蒽环类药物。另一类是靶向药，现在主要是索拉非尼，它可以抑制肿瘤的生长，也可以抑制肿瘤新生血管的形成
硒对于肝癌病人很重要吗？	硒是抗氧剂，可防止因氧化而引起的衰老、组织硬化，减慢其变化的速度，并且它还具有活化免疫系统，预防癌症的功效，对手术和放化疗治疗后的患者有辅助改善作用。
五类肝癌患者可以使用靶向药物治疗吗？	可以使用，建议先行通过基因检测，降低不必要的医疗支出，避免了对人体造成更大的伤害
我有一公分大的一个肝血管瘤能吃中药治疗吗	中药主要用于改善患者症状，但对肿瘤的治疗效果尚不明确，建议去医院就诊，由医生评估病情，制定治疗方案，中药相关可咨询中医科。
我想知道槐耳颗粒能根治肝癌吗	槐耳颗粒为原发性肝癌不宜手术和化疗者辅助治疗用药，有改善肝区疼痛、腹胀、乏力等症状的作用。具体使用效果请咨询肿瘤科医生。
我是位肝癌患者，有人说吃蟾蜍能治，能吃吗	中医药物的使用请在中医专业指导下使用。若确诊肝癌，建议就诊医院，由医生评估患者病情，制定治疗方案。
我是肝癌患者家属，有人吃野生灵芝痊愈啦，我买不到，是真的吗？	灵芝不能治疗肝癌，但对肝疗有一定的疗效。治疗肝癌在选择药物和治疗方式上也是很关健的，建议咨询住专科门诊
我家老人肝癌晚期，做电疗好还是做化疗好？	每个人适合的治疗方案不同，晚期肝癌一般以改善症状，提高生活质量为主，具体做什么治疗需根据患者具体状况咨询门诊医生
我大爷得肝癌，听别人说吃桑黄能缓解病情，是真的吗？	桑黄是一味中药，主要用来活血，止血，化饮，止泻。具体使用请在中医科指导下使用
我爸肝癌晚期夜晚睡不着觉，吃什么药好呢？	可以给一定的安眠药物进行治疗，具体请咨询专科门诊。
胃部痛，拉肚子和肝血管瘤有关系吗	肝血管瘤是肝脏的良性肿瘤，如果肝血管瘤持续增大，压迫胃，肠道的话，有可能会引起拉肚子。具体病因需要经过检查后来明确诊断，建议门诊检查。
晚期肝癌晚期打血浆有用吗	晚期肝癌患者凝血功能会有损伤，医生会根据患者具体病情评估，决定是否输血浆治疗，改善患者营养状况，但是对于肿瘤的治疗并无直接效果。
晚期肝癌免疫疗法效果好吗？	肝癌免疫治疗主要包括免疫调节剂、免疫检查点抑制剂、细胞免疫治疗。这些治疗手段有一定的抗肿瘤作用，但在用于临床之前需要更多地研究验证。
晚期肝癌吃乐伐替尼有用吗？	乐伐替尼是用于治疗晚期肝细胞癌的靶向药物，但需要根据患者的基因检测结果来判断是否具有疗效
晚期肝癌靶向药物选择？	常用药物有索拉非尼，乐伐替尼，具体请咨询肿瘤科
索拉菲尼治疗失败的肝癌还有靶向药可用吗？	可以通过基因检测，进行匹配筛选适合患者基因型的药物，详情请咨询肿瘤专科门诊
索拉菲尼治疗肝癌有效吗？	索拉非尼是种治疗肝癌的靶向药物，针对特定的肿瘤患者人群具有一定效果，具体疗效需要爱根据患者的身体状况，病情发展，基因检测情况进行评估，具体请咨询专科医生。
生物细胞免疫疗法真的能肝癌吗？是不是骗人的？	目前最好的治疗肝癌的方法是手术治疗，生物细胞一般与化疗联用，起到辅助治疗的作用。
什么中草药能治肝癌	肝癌的治疗首选是手术治疗，对于无法手术的患者可以考虑介入或者放化疗，中药主要用于辅助治疗肝癌，提高机体免疫力，改善全身症状，没有治疗肝癌的特效中药
什么药可以治肝癌？	肝癌的治疗最主要的还是通过手术的方式来切除病变部位，药物的治疗主要是起到辅助的效果，并杀死其余的癌细胞，常见的药物有一大类就是化疗药，如铂类、氟尿嘧啶、蒽环类药物。另一类是靶向药，现在主要是索拉非尼，它可以抑制肿瘤的生长，也可以抑制肿瘤新生血管的形成
什么草药可以治肝癌？	肝癌的治疗最主要的还是通过手术的方式来切除病变部位，药物的治疗主要是起到辅助的效果，并杀死其余的癌细胞。使用中医治疗主要是对症治疗及放化疗的辅助治疗，具体什么中药需要根据患者的具体状况，咨询中医科的医生。
什么草可以治肝癌？	肝癌的治疗最主要的还是通过手术的方式来切除病变部位，药物的治疗主要是起到辅助的效果，并杀死其余的癌细胞。使用中医治疗主要是对症治疗及放化疗的辅助治疗，具体什么中药需要根据患者的具体状况，咨询中医科的医生。
人参皂苷rh2能不能长期服用，肝癌晚期，正在做化疗，化疗之后吃这个	人生皂苷具有一定的抗肿瘤作用，但是只能用作治疗的辅助用药，无法当做常规用药，具体使用请在专科指导下使用。
确认肝癌晚期,能否马上服用片仔癀	中药一般用于癌症的辅助对症治疗，具体使用请在中医科指导下使用
请问早期肝癌吃什么药好啊	肝癌的治疗最主要的还是通过手术的方式来切除病变部位，药物的治疗主要是起到辅助的效果，并杀死其余的癌细胞，常见的药物有一大类就是化疗药，如铂类、氟尿嘧啶、蒽环类药物。另一类是靶向药，现在主要是索拉非尼，它可以抑制肿瘤的生长，也可以抑制肿瘤新生血管的形成
请问原发性肝癌术后吃什么药比较好?	肝癌术后建议考虑以全身性的治疗方式，如化疗、生物免疫治疗等，缓解患者症状，增加患者的治疗效果。
请问肝癌晚期吃什么止痛药效果明显？	癌症三级止痛，其中Ⅰ级止痛适用于一般疼痛。使用非麻醉止痛剂加减辅佐剂（非类固醇类）。Ⅱ级止痛适用于中度持续疼痛或疼痛加重。使用弱麻醉剂加减非麻醉止痛剂加减辅佐剂。Ⅲ级止痛适用于强烈持续疼痛。使用强麻醉剂加非麻醉止痛剂加辅佐剂。建议咨询疼痛科。
请问,肝癌中晚期能治好吗/吃索拉菲尼有用吗/	肝癌到了中晚期一般是无法治愈，我们需要做的是尽量延长患者的生存时间，改善患者的生存质量。索拉非尼针对特定基因型的患者会起到一定的作用，需要进行基因检测进行判断
蒲公英对肝癌病有效吗	蒲公英对癌症可以说没什么治疗效果。 具体使用请咨询中医科。
片仔癀能治肝癌吗？	片仔癀可以辅助肝细胞癌的治疗。它具有“清热解毒,促进血液循环,络脉,减少肿胀和缓解疼痛”的特点,在肝癌的治疗可以有效地减轻了疼痛和改善生活质量
您好请问肝癌晚期有什么特效药	肝癌到了中晚期一般是无法治愈，我们需要做的是尽量延长患者的生存时间，改善患者的生存质量。
您好，请问肝癌晚期病人服用硒维康口嚼片能不能缓解病情	硒是抗氧剂，可防止因氧化而引起的衰老、组织硬化，减慢其变化的速度，并且它还具有活化免疫系统，预防癌症的功效，对手术和放化疗治疗后的患者有辅助改善作用。
你好我想请问一下蟑螂可以抑制肝癌吗？？？	蟑螂是否对肝癌的治疗有效，可以咨询中医科；肝癌患者建议于医院就诊，完善相关检查，由医生决定具体的治疗方案。
你好肝癌一年五个月穿山甲能治疗吗	穿山甲主治积聚，血瘀经闭，乳汁不通，痈肿，瘰疬，痰核，风湿痹痛，中风瘫痪，疥癣，风癞。对肝功能并没有很大的帮助。但可以适量滋补下身体，加强免疫力，请遵医嘱使用
你好，肝癌吃了替吉奥胶囊有用吗	替吉奥胶囊适用于一部分的肝癌患者，具体疗效需要爱根据患者的身体状况，病情发展，基因检测情况进行评估
哪些肝癌患者需要化疗	肝癌的治疗最主要的还是通过手术的方式来切除病变部位，药物的治疗主要是起到辅助的效果，并杀死其余的癌细胞，常见的药物有一大类就是化疗药，如铂类、氟尿嘧啶、蒽环类药物。另一类是靶向药，现在主要是索拉非尼，它可以抑制肿瘤的生长，也可以抑制肿瘤新生血管的形成
免疫疗法对肝癌的作用？	免疫疗法是利用人体内的免疫机制来对抗肿瘤细胞；正常人体内也所有癌细胞，不扩散没恶化不对人体产生不良影响是因为正常人免疫能力和自我调节能力正常，所以免疫疗法让整体免疫能力提高了，相对来说癌细胞恶化和扩散得到一定扼制，延长生命的同时让身体整体各项能力指标提高。
抗肝癌的中成药有哪些？	使用中医治疗主要是对症治疗及放化疗的辅助治疗，具体吃多久的中药需要根据患者的具体状况，咨询中医科的医生。
抗肝癌的药有哪些药?	肝癌的治疗最主要的还是通过手术的方式来切除病变部位，药物的治疗主要是起到辅助的效果，并杀死其余的癌细胞，常见的药物有一大类就是化疗药，如铂类、氟尿嘧啶、蒽环类药物。另一类是靶向药，现在主要是索拉非尼，它可以抑制肿瘤的生长，也可以抑制肿瘤新生血管的形成
检查早期肝癌，吃药有效吗？	肝癌的治疗最主要的还是通过手术的方式来切除病变部位，药物的治疗主要是起到辅助的效果，并杀死其余的癌细胞，常见的药物有一大类就是化疗药，如铂类、氟尿嘧啶、蒽环类药物。另一类是靶向药，现在主要是索拉非尼，它可以抑制肿瘤的生长，也可以抑制肿瘤新生血管的形成
甲磺酸阿帕替尼片治疗肝癌有效吗	阿帕替尼作为小分子抗血管生成类靶向药物，在多瘤种上有着很好的临床运用和治疗效果。使用详情请查阅药品使用说明书。
甲磺酸阿帕替尼片对肝癌晚期有用吗？	阿帕替尼作为小分子抗血管生成类靶向药物，在多瘤种上有着很好的临床运用和治疗效果。使用详情请查阅药品使用说明书。
护肝片肝癌可以吃吗	护肝片是中成药，成分有柴胡、茵陈、板蓝根、五味子、猪胆粉、绿豆，具有疏肝理气，健脾消食。具有降低转氨酶作用，用于慢性肝炎及早期肝硬化。具体使用请咨询中医科。
肝肿瘤吃什么中药调理?	首选手术治疗，使用中医治疗主要是对症治疗及放化疗的辅助治疗，具体什么中药需要根据患者的具体状况，咨询中医科的医生。
肝里有肿瘤,腿中吃什么药？	首选手术治疗，使用中医治疗主要是对症治疗及放化疗的辅助治疗，具体什么中药需要根据患者的具体状况，咨询中医科的医生。
肝癌做介入手术后吃什么中药	使用中医治疗主要是对症治疗及放化疗的辅助治疗，具体什么中药需要根据患者的具体状况，咨询中医科的医生。
肝癌做穿刺多久出结果？	病理结果依据各医疗单位的病理科有所不同，详情请咨询所做穿刺单位的病理科。
肝癌最好的药物是哪个？	肝癌的治疗最主要的还是通过手术的方式来切除病变部位，药物的治疗主要是起到辅助的效果，并杀死其余的癌细胞，常见的药物有一大类就是化疗药，如铂类、氟尿嘧啶、蒽环类药物。另一类是靶向药，现在主要是索拉非尼，它可以抑制肿瘤的生长，也可以抑制肿瘤新生血管的形成
肝癌转移到肺上，吃中药还有救吗	肝癌的治疗首选是手术治疗，对于无法手术的患者可以考虑介入或者放化疗，中药主要用于辅助治疗肝癌，提高机体免疫力，改善全身症状，没有治疗肝癌的特效中药
肝癌中医哪里看得好？	肝癌的治疗最主要的还是通过手术的方式来切除病变部位，对于无法手术的患者可以考虑介入或者放化疗，中药主要用于辅助治疗肝癌，提高机体免疫力，改善全身症状。如果想去看中医，建议去中医医院或者具有中医科的正规医院就诊。
肝癌中药能治愈吗?	肝癌的治疗首选是手术治疗，对于无法手术的患者可以考虑介入或者放化疗，中药主要用于辅助治疗肝癌，提高机体免疫力，改善全身症状，没有治疗肝癌的特效中药
肝癌中药和西药可以一起吃吗？	在一定情况下，中药可以与西药一起使用，用于肝癌的辅助治疗，但是需要根据肝癌患者的具体情况进行判断，详情需要咨询医生
肝癌中期中药能治好吗	肝癌的治疗首选是手术治疗，对于无法手术的患者可以考虑介入或者放化疗，中药主要用于辅助治疗肝癌，提高机体免疫力，改善全身症状，没有治疗肝癌的特效中药
肝癌中期手术切除后多久可以吃药调理	使用中医治疗主要是对症治疗及放化疗的辅助治疗，具体吃多久的中药需要根据患者的具体状况，咨询中医科的医生。
肝癌中期吃靶向药有半年了请问可以买一些中药一起吃吗	在肝癌治疗中，中药主要用于辅助治疗肝癌，提高机体免疫力，改善全身症状，没有治疗肝癌的特效药物
肝癌止痛药有哪些？	癌症三级止痛，其中Ⅰ级止痛适用于一般疼痛。使用非麻醉止痛剂加减辅佐剂（非类固醇类）。Ⅱ级止痛适用于中度持续疼痛或疼痛加重。使用弱麻醉剂加减非麻醉止痛剂加减辅佐剂。Ⅲ级止痛适用于强烈持续疼痛。使用强麻醉剂加非麻醉止痛剂加辅佐剂。建议咨询疼痛科。
肝癌早期做了消融术，术后应该吃什么药效果	术后应该吃一些全身治疗的药物，化疗或者生物治疗。或者改善患者身体状况的药物，维持患者的状态，提高患者的生存质量。
肝癌早期手术后吃中药能治愈吗优质推荐？	使用中医治疗主要是对症治疗及放化疗的辅助治疗，具体吃多久的中药需要根据患者的具体状况，咨询中医科的医生。
肝癌有血管侵犯及门静脉癌栓能做肝移植吗？	具体需要判断血管侵犯及癌栓的程度，结合手术医生的水平来判断能否进行肝移植。
肝癌有什么药物可以治疗	肝癌的治疗最主要的还是通过手术的方式来切除病变部位，药物的治疗主要是起到辅助的效果，并杀死其余的癌细胞，常见的药物有一大类就是化疗药，如铂类、氟尿嘧啶、蒽环类药物。另一类是靶向药，现在主要是索拉非尼，它可以抑制肿瘤的生长，也可以抑制肿瘤新生血管的形成
肝癌有偏方吗？	肝癌的治疗最主要的还是通过手术的方式来切除病变部位，药物的治疗主要是起到辅助的效果，并杀死其余的癌细胞，常见的药物有一大类就是化疗药，如铂类、氟尿嘧啶、蒽环类药物。另一类是靶向药，现在主要是索拉非尼，它可以抑制肿瘤的生长，也可以抑制肿瘤新生血管的形成
肝癌用什么中成药最好？	肝癌的治疗首选是手术治疗，对于无法手术的患者可以考虑介入或者放化疗，中药主要用于辅助治疗肝癌，提高机体免疫力，改善全身症状，没有治疗肝癌的特效中药
肝癌用什么药最好	肝癌的治疗最主要的还是通过手术的方式来切除病变部位，药物的治疗主要是起到辅助的效果，并杀死其余的癌细胞，常见的药物有一大类就是化疗药，如铂类、氟尿嘧啶、蒽环类药物。另一类是靶向药，现在主要是索拉非尼，它可以抑制肿瘤的生长，也可以抑制肿瘤新生血管的形成
肝癌用什么药治疗最好?	肝癌的治疗最主要的还是通过手术的方式来切除病变部位，药物的治疗主要是起到辅助的效果，并杀死其余的癌细胞，常见的药物有一大类就是化疗药，如铂类、氟尿嘧啶、蒽环类药物。另一类是靶向药，现在主要是索拉非尼，它可以抑制肿瘤的生长，也可以抑制肿瘤新生血管的形成
肝癌应该化疗吗	化疗用于手术无法切除的肿瘤或者辅助治疗，并杀死其余的癌细胞，常见的药物有一大类就是化疗药，如铂类、氟尿嘧啶、蒽环类药物。另一类是靶向药，现在主要是索拉非尼，它可以抑制肿瘤的生长，也可以抑制肿瘤新生血管的形成
肝癌一般做不做化疗？	化疗用于手术无法切除的肿瘤或者辅助治疗，并杀死其余的癌细胞，常见的药物有一大类就是化疗药，如铂类、氟尿嘧啶、蒽环类药物。另一类是靶向药，现在主要是索拉非尼，它可以抑制肿瘤的生长，也可以抑制肿瘤新生血管的形成
肝癌一般早期吃中药能否治好啊？	肝癌的治疗首选是手术治疗，对于无法手术的患者可以考虑介入或者放化疗，中药主要用于辅助治疗肝癌，提高机体免疫力，改善全身症状，没有治疗肝癌的特效中药
肝癌要不要做基因检测？	通过基因检测，可以提示我们哪些药物要慎用，大大地降低不必要的医疗支出，提高了疗效，避免了对人体造成更大的伤害。
肝癌药物有哪些	常见的药物有一大类就是化疗药，如铂类、氟尿嘧啶、蒽环类药物。另一类是靶向药，现在主要是索拉非尼，它可以抑制肿瘤的生长，也可以抑制肿瘤新生血管的形成
肝癌为什么要输血浆？	血浆只是改善患者身体凝血环境，改善患者营养状况，但是对于肿瘤的治疗并无效果
肝癌为啥不化疗？	化疗用于手术无法切除的肿瘤或者辅助治疗，并杀死其余的癌细胞，常见的药物有一大类就是化疗药，如铂类、氟尿嘧啶、蒽环类药物。另一类是靶向药，现在主要是索拉非尼，它可以抑制肿瘤的生长，也可以抑制肿瘤新生血管的形成
肝癌晚期做完介入还能服用中药吗	中药主要用于辅助治疗肝癌，提高机体免疫力，改善全身症状，没有治疗肝癌的特效中药
肝癌晚期中医治疗有效果吗	肝癌的治疗首选是手术治疗，对于无法手术的患者可以考虑介入或者放化疗，中药主要用于辅助治疗肝癌，提高机体免疫力，改善全身症状，没有治疗肝癌的特效中药
肝癌晚期中医怎么治疗	肝癌的治疗首选是手术治疗，对于无法手术的患者可以考虑介入或者放化疗，中药主要用于辅助治疗肝癌，提高机体免疫力，改善全身症状，没有治疗肝癌的特效中药
肝癌晚期中医能治好吗？	肝癌的治疗首选是手术治疗，对于无法手术的患者可以考虑介入或者放化疗，中药主要用于辅助治疗肝癌，提高机体免疫力，改善全身症状，没有治疗肝癌的特效中药
肝癌晚期中药治疗效果好吗	肝癌的治疗首选是手术治疗，对于无法手术的患者可以考虑介入或者放化疗，中药主要用于辅助治疗肝癌，提高机体免疫力，改善全身症状，没有治疗肝癌的特效中药
肝癌晚期中药治疗，用人参皂苷RH2可以吗？	肝癌的治疗首选是手术治疗，对于无法手术的患者可以考虑介入或者放化疗，中药主要用于辅助治疗肝癌，提高机体免疫力，改善全身症状，没有治疗肝癌的特效中药
肝癌晚期中药有用吗?	肝癌的治疗首选是手术治疗，对于无法手术的患者可以考虑介入或者放化疗，中药主要用于辅助治疗肝癌，提高机体免疫力，改善全身症状，没有治疗肝癌的特效中药
肝癌晚期中药有哪些	肝癌的治疗首选是手术治疗，对于无法手术的患者可以考虑介入或者放化疗，中药主要用于辅助治疗肝癌，提高机体免疫力，改善全身症状，没有治疗肝癌的特效中药
肝癌晚期中西医结合治会好些吗	肝癌的患者可以患者情况可以适当做介入治疗，再配合中药治疗，建议服用抗肿瘤中成药口服液,综合调理一段时间,在杀瘤的基础上,提高机体免疫力.增强体质,预防复发转移，可以延长寿命改善生活质量。
肝癌晚期中西药可以同时用吗	肝癌的患者可以患者情况可以适当做介入治疗，再配合中药治疗，建议服用抗肿瘤中成药口服液,综合调理一段时间,在杀瘤的基础上,提高机体免疫力.增强体质,预防复发转移，可以延长寿命改善生活质量。
肝癌晚期中度疼痛吃什么止痛药呢？	癌症三级止痛，其中Ⅰ级止痛适用于一般疼痛。使用非麻醉止痛剂加减辅佐剂（非类固醇类）。Ⅱ级止痛适用于中度持续疼痛或疼痛加重。使用弱麻醉剂加减非麻醉止痛剂加减辅佐剂。Ⅲ级止痛适用于强烈持续疼痛。使用强麻醉剂加非麻醉止痛剂加辅佐剂。建议咨询疼痛科。
肝癌晚期治疗偏方有什么	肝癌的治疗首选是手术治疗，对于晚期无法手术的患者可以考虑介入或者放化疗，中药主要用于辅助治疗肝癌，提高机体免疫力，改善全身症状
肝癌晚期在化疗想吃中药可以吗？	肝癌的治疗首选是手术治疗，对于无法手术的患者可以考虑介入或者放化疗，中药主要用于辅助治疗肝癌，提高机体免疫力，改善全身症状，没有治疗肝癌的特效中药
肝癌晚期有特效药吗？能治愈么	肝癌到了中晚期一般是无法治愈，并无特效药，我们需要做的是尽量延长患者的生存时间，改善患者的生存质量。
肝癌晚期有特效药吗，谁知道？	肝癌到了中晚期一般是无法治愈，我们需要做的是尽量延长患者的生存时间，改善患者的生存质量。
肝癌晚期有什么偏方呢？	肝癌到了中晚期一般是无法治愈，我们需要做的是尽量延长患者的生存时间，改善患者的生存质量。
肝癌晚期有啥治疗建议	肝癌的治疗首选是手术治疗，对于晚期无法手术的患者可以考虑介入或者放化疗，联合中药用于辅助治疗肝癌，提高机体免疫力，改善全身症状
肝癌晚期有那些药可以止痛	癌症三级止痛，其中Ⅰ级止痛适用于一般疼痛。使用非麻醉止痛剂加减辅佐剂（非类固醇类）。Ⅱ级止痛适用于中度持续疼痛或疼痛加重。使用弱麻醉剂加减非麻醉止痛剂加减辅佐剂。Ⅲ级止痛适用于强烈持续疼痛。使用强麻醉剂加非麻醉止痛剂加辅佐剂。建议咨询疼痛科。
肝癌晚期有必要治吗？	肝癌晚期患者，并发症很多，难以治愈，但是可以对症治疗，改善患者营养状况，减轻患者疼痛，提高患者生存质量，增加患者的生存期。
肝癌晚期有必要用白蛋白吗？	白蛋白是肝脏合成的一种重要的血清蛋白成分，具有营养、携带体内物质成分、维持渗透压等功能，但不提高机体免疫力。肝癌患者晚期往往伴随肝功能下降，白蛋白低的问题，可以根据患者白蛋白水平及具体病情判断是否需要输注白蛋白。
肝癌晚期用什么止痛药效果好？	癌症三级止痛，其中Ⅰ级止痛适用于一般疼痛。使用非麻醉止痛剂加减辅佐剂（非类固醇类）。Ⅱ级止痛适用于中度持续疼痛或疼痛加重。使用弱麻醉剂加减非麻醉止痛剂加减辅佐剂。Ⅲ级止痛适用于强烈持续疼痛。使用强麻醉剂加非麻醉止痛剂加辅佐剂。建议咨询疼痛科。
肝癌晚期用什么止疼药最好使	癌症三级止痛，其中Ⅰ级止痛适用于一般疼痛。使用非麻醉止痛剂加减辅佐剂（非类固醇类）。Ⅱ级止痛适用于中度持续疼痛或疼痛加重。使用弱麻醉剂加减非麻醉止痛剂加减辅佐剂。Ⅲ级止痛适用于强烈持续疼痛。使用强麻醉剂加非麻醉止痛剂加辅佐剂。建议咨询疼痛科。
肝癌晚期用什么止疼药？	癌症三级止痛，其中Ⅰ级止痛适用于一般疼痛。使用非麻醉止痛剂加减辅佐剂（非类固醇类）。Ⅱ级止痛适用于中度持续疼痛或疼痛加重。使用弱麻醉剂加减非麻醉止痛剂加减辅佐剂。Ⅲ级止痛适用于强烈持续疼痛。使用强麻醉剂加非麻醉止痛剂加辅佐剂。建议咨询疼痛科。
肝癌晚期用什么药最好?	肝癌的治疗最主要的还是通过手术的方式来切除病变部位，药物的治疗主要是起到辅助的效果，并杀死其余的癌细胞，常见的药物有一大类就是化疗药，如铂类、氟尿嘧啶、蒽环类药物。另一类是靶向药，现在主要是索拉非尼，它可以抑制肿瘤的生长，也可以抑制肿瘤新生血管的形成
肝癌晚期用什么药止痛	癌症三级止痛，其中Ⅰ级止痛适用于一般疼痛。使用非麻醉止痛剂加减辅佐剂（非类固醇类）。Ⅱ级止痛适用于中度持续疼痛或疼痛加重。使用弱麻醉剂加减非麻醉止痛剂加减辅佐剂。Ⅲ级止痛适用于强烈持续疼痛。使用强麻醉剂加非麻醉止痛剂加辅佐剂。建议咨询疼痛科。
肝癌晚期用什么药比较好	癌症三级止痛，其中Ⅰ级止痛适用于一般疼痛。使用非麻醉止痛剂加减辅佐剂（非类固醇类）。Ⅱ级止痛适用于中度持续疼痛或疼痛加重。使用弱麻醉剂加减非麻醉止痛剂加减辅佐剂。Ⅲ级止痛适用于强烈持续疼痛。使用强麻醉剂加非麻醉止痛剂加辅佐剂。建议咨询疼痛科。
肝癌晚期用什么药	癌症三级止痛，其中Ⅰ级止痛适用于一般疼痛。使用非麻醉止痛剂加减辅佐剂（非类固醇类）。Ⅱ级止痛适用于中度持续疼痛或疼痛加重。使用弱麻醉剂加减非麻醉止痛剂加减辅佐剂。Ⅲ级止痛适用于强烈持续疼痛。使用强麻醉剂加非麻醉止痛剂加辅佐剂。建议咨询疼痛科。
肝癌晚期一直输营养液怎么办？	晚期肝癌为消耗性疾病，并且此时患者通常有食欲不振等不良症状，可静脉输营养液补充营养，改善患者的营养状况。
肝癌晚期一定得放疗吗	放射治疗是指放射治疗，化疗是指化学药物。对于恶性肿瘤，有些对化疗更敏感，有些对放疗更敏感。放疗或化疗不能一概而论，但放疗和化疗会产生一些副作用。建议同时服用抗癌中药，避免疾病过度恶化。患者能保持良好的心态，积极配合医生的治疗。
肝癌晚期一般注射什么药物？	肝癌到了中晚期一般是无法治愈，我们需要做的是尽量延长患者的生存时间，改善患者的生存质量。
肝癌晚期腿部浮肿吃什么药物好？	肝癌晚期主要是因为患者营养状况差导致的浮肿，一般考虑可以输液用白蛋白加强营养，服用利尿药物对症治疗
肝癌晚期通过化疗能不能治好?	肝癌到了中晚期一般是无法治愈，我们需要做的是尽量延长患者的生存时间，改善患者的生存质量。
肝癌晚期疼痛吃中药有效果吗？	肝癌晚期的疼痛主要由于肿瘤压迫及侵犯神经引起，可以至专科门诊使用一些止痛药物来干山疼痛的症状。中药可能改善患者的疼痛状况，具体请咨询中医科医生，
肝癌晚期疼痛不化疗吃中药可以吗？	肝癌的治疗首选是手术治疗，对于无法手术的患者可以考虑介入或者放化疗，中药主要用于辅助治疗肝癌，提高机体免疫力，改善全身症状，没有治疗肝癌的特效中药
肝癌晚期是不是一定要吃抗病毒的药？	抗病毒治疗对肝癌晚期并无治疗作用。同时，病毒性肝炎为肝癌的常见诱发因素，对于肝炎病毒患者，应积极治疗。建议避免盲目用药，如为肝癌晚期，治疗主要以对症处理及减轻痛苦为主。
肝癌晚期身体虚弱可以打氨基酸吗？	对于肝癌患者晚期身体虚弱是可以进行静脉输氨基酸治疗的，以保证机体的营养代谢。
肝癌晚期如何不痛的走？	可以使用一定的止疼药物。具体可以咨询疼痛科。
肝癌晚期能用靶向药吗？	肝癌靶向药的选择一般是需要做基因检测的，如果有基因突变才可以使用靶向药物。而且在治疗的同时，患者也一定要有积极的心态，能够积极的配合医生制定的治疗方案，调解心情，养成良好的生活习惯。
肝癌晚期能化疗几次？	建议于正规医院就诊相关科室，由医生根据病情状况进行评估，制定确切的治疗方案。
肝癌晚期能服用芍药和甘草为主要成分的中药	中药一般用于癌症的辅助对症治疗，具体使用请在中医科指导下使用
肝癌晚期能打营养针吗？	肿瘤晚期患者往往伴随着营养不良的状况，可以打营养针，增强患者的营养状况。
肝癌晚期可以做理疗吗怎样做最好？	手术是肝癌首选的治疗方法，通过完整的清除肿瘤组织，达到治愈的目的。理疗主要用于由于各种原因不能接受手术治疗的患者，改善患者症状，提高患者的生存质量。
肝癌晚期可以注射白蛋白还是球蛋白？	肝癌患者晚期往往伴随肝功能下降，白蛋白低的问题，可以输注白蛋白加强营养，建议遵循医嘱
肝癌晚期可以同时吃两种靶向药吗？	建议根据基因检测的结果进行服药，可咨询肿瘤科
肝癌晚期可以输白蛋白吗	肝癌患者晚期往往伴随肝功能下降，白蛋白低的问题，可以输注白蛋白加强营养，建议遵循医嘱
肝癌晚期可以服用复方斑蝥胶囊吗	参考一下药品说明书，有具体的适用症，禁忌，注意事项等，并且于医院就诊，咨询相关科室大夫。
肝癌晚期可以放疗吗	放射治疗是指放射治疗，化疗是指化学药物。对于恶性肿瘤，有些对化疗更敏感，有些对放疗更敏感。放疗或化疗不能一概而论，但放疗和化疗会产生一些副作用。建议同时服用抗癌中药，避免疾病过度恶化。患者能保持良好的心态，积极配合医生的治疗。
肝癌晚期可以吃吗啡片吗？	癌症晚期，使用药物的目的主要就是对症止痛，只能对症缓解疼痛不适，延长寿命，减轻痛苦。癌症的话，可以根据自己的身体状况适当的调整剂量，具体需至专科门诊进行评估。
肝癌晚期介入后靶向药什么时候吃？	肝癌一旦到了晚期就已经出现癌细胞扩散的情况，这样的情况下要看个人的病情来决定是否能选择使用靶向药物来进行治疗。
肝癌晚期患者一小时之内连续打三针吗啡会出现什么症状	癌症晚期，使用药物的目的主要就是对症止痛，只能对症缓解疼痛不适，延长寿命，减轻痛苦。癌症的话，可以根据自己的身体状况适当的调整剂量，具体需至专科门诊进行评估。
肝癌晚期患者吃艾坦好还是吉美好？	肝癌到了中晚期一般是无法治愈，我们需要做的是尽量延长患者的生存时间，改善患者的生存质量。具体的化疗药物需要进行基因检测进行判断
肝癌晚期患者，出现剧烈疼痛，有缓解的药物？	可以使用止疼药物。属于癌症晚期的话，那么使用药物的目的主要就是对症止痛，缓解疼痛不适，延长寿命，减轻痛苦。癌症的话，可以根据自己的身体状况适当的调整剂量。
肝癌晚期化疗有效吗	是否是需要进行放化疗，需要结合临床的情况来判断。如果不需要进行放化疗的话，后期需定期进行复查。具体是否需要化疗需要根据主治医生的意见，结合病理情况判断。
肝癌晚期化疗有效果吗	是否是需要进行放化疗，需要结合临床的情况来判断。如果不需要进行放化疗的话，后期需定期进行复查。具体是否需要化疗需要根据主治医生的意见，结合病理情况判断。
肝癌晚期还有治疗的必要吗？	肝癌到了中晚期一般是无法治愈，我们需要做的是尽量延长患者的生存时间，改善患者的生存质量。具体的化疗药物需要进行基因检测进行判断
肝癌晚期还有必要化疗吗	是否是需要进行放化疗，需要结合临床的情况来判断。如果不需要进行放化疗的话，后期需定期进行复查。具体是否需要化疗需要根据主治医生的意见，结合病理情况判断。
肝癌晚期腹水中药偏方有吗	中药一般用于癌症的辅助对症治疗，具体使用请在中医科指导下使用
肝癌晚期腹水 出现下肢严重水肿能使用利尿剂吗？	一般是可以使用利尿剂的，但是如果同时存在严重低蛋白血症的话单纯利尿效果可能不理想，同时要注意治疗副作用的及时纠正补充
肝癌晚期放疗好吗？	放射治疗是指放射治疗，化疗是指化学药物。对于恶性肿瘤，有些对化疗更敏感，有些对放疗更敏感。放疗或化疗不能一概而论，但放疗和化疗会产生一些副作用。建议同时服用抗癌中药，避免疾病过度恶化。患者能保持良好的心态，积极配合医生的治疗。
肝癌晚期发热应该吃什么药物退烧？	肝癌患者出现发热症状后，首先应明确引起肝癌患者发热的根本原因是什么，因为肝癌发热的原因通常与癌性发热、细菌感染以及药物性发热等多种因素有关，所以肝癌出现发热症状后首先应明确肝癌发烧的原因是什么，从而为治疗打好基础。
肝癌晚期肚子胀痛吃什么中药	治疗腹水一般通过输注白蛋白利尿的方法减少腹水，还可以通过穿刺的方法将腹水引流出来，使用中医治疗的话请咨询中医科医生，
肝癌晚期肚子胀气难受怎么办？用什么药可缓解	出现腹胀的话则是需要考虑为腹水的情况，其次的话则是需要考虑为肠胀气的情况。 如果是肠胀气的话则是需要采取灌肠及通便的药物治疗，其次做个腹部彩超检查是否为腹水，腹水的话则是需要采取利尿的药物治疗。
肝癌晚期肚子胀的偏方	出现腹胀的话则是需要考虑为腹水的情况，其次的话则是需要考虑为肠胀气的情况。 如果是肠胀气的话则是需要采取灌肠及通便的药物治疗，其次做个腹部彩超检查是否为腹水，腹水的话则是需要采取利尿的药物治疗。
肝癌晚期的患者能否服用氨基酸口服液？	对于肝癌晚期是消耗性疾病，患者身体虚弱是可以进行氨基酸治疗的，以保证机体的营养代谢。
肝癌晚期到哪里找最好的中医治疗	肝癌晚期一般难以治愈，但多数伴随并发症，中药治疗可辅助肝癌治疗，改善症状，建议去大型专科中医医院就诊。
肝癌晚期打什么营养针？	部分肝癌晚期患者可出现免疫力低下和其他临床症状，针剂大部分以提高免疫力及对症治疗为主
肝癌晚期打人血白蛋白好吗？	白蛋白是肝脏合成的一种重要的血清蛋白成分，具有营养、携带体内物质成分、维持渗透压等功能，但不提高机体免疫力。肝癌患者晚期往往伴随肝功能下降，白蛋白低的问题，可以根据患者白蛋白水平及具体病情判断是否需要输注白蛋白。
肝癌晚期出现黄疸可以打白蛋白吗？	白蛋白是肝脏合成的一种重要的血清蛋白成分，具有营养、携带体内物质成分、维持渗透压等功能，但不提高机体免疫力。肝癌患者晚期往往伴随肝功能下降，白蛋白低的问题，可以根据患者白蛋白水平及具体病情判断是否需要输注白蛋白。
肝癌晚期吃中药有效果嘛？	晚期肝癌中医治疗主要为对症治疗，改善患者营养状况，减轻患者疼痛，提高患者生存质量，增加患者的生存期。具体使用药物需要咨询中医科医生，
肝癌晚期吃中药还能不能控制病情的发展	晚期肝癌中医治疗主要为对症治疗，改善患者营养状况，减轻患者疼痛，提高患者生存质量，增加患者的生存期。具体使用药物需要咨询中医科医生，
肝癌晚期吃些什么食物	肝癌中晚期病人体质较弱，需先加强对蛋白质的摄入，多吃鱼肉，瘦肉，奶制品，豆制品，蛋类等。注意食物要煮软烂一些，方便消化与进食。各类绿色果蔬也要多吃，所含的维生素类，胡萝卜素等有利于辅助增强机体免疫。也建议多加补点硒元素，能起到短时间内增强免疫，以及辅助稳定病情，减小复发风险，可以多吃芦笋，蘑菇，海产品等食物，也可以直接用西维康口嚼片等常见的免疫力增强制品
肝癌晚期吃什么中药最好？	晚期肝癌治疗主要为对症治疗，改善患者营养状况，减轻患者疼痛，提高患者生存质量，增加患者的生存期。具体使用药物需要咨询中医科医生，
肝癌晚期吃什么中药能缓解病人的痛苦	晚期肝癌治疗主要为对症治疗，改善患者营养状况，减轻患者疼痛，提高患者生存质量，增加患者的生存期。具体使用药物需要咨询中医科医生，
肝癌晚期吃什么中药好？	根据肝癌的发展状况，以及患者的具体症状使用中药来改善患者的生存质量，改善症状，提高患者的生存质量
肝癌晚期吃什么中药?	根据肝癌的发展状况，以及患者的具体症状使用中药来改善患者的生存质量，改善症状，提高患者的生存质量
肝癌晚期吃什么药好	肝癌到了中晚期一般是无法治愈，我们需要做的是尽量延长患者的生存时间，改善患者的生存质量。
肝癌晚期吃什么药，有特效药吗	肝癌到了中晚期一般是无法治愈，我们需要做的是尽量延长患者的生存时间，改善患者的生存质量。
肝癌晚期吃什么药	肝癌到了中晚期一般是无法治愈，我们需要做的是尽量延长患者的生存时间，改善患者的生存质量。
肝癌晚期吃什么才能提高免疫力	肝癌中晚期病人体质较弱，需先加强对蛋白质的摄入，多吃鱼肉，瘦肉，奶制品，豆制品，蛋类等。注意食物要煮软烂一些，方便消化与进食。各类绿色果蔬也要多吃，所含的维生素类，胡萝卜素等有利于辅助增强机体免疫。也建议多加补点硒元素，能起到短时间内增强免疫，以及辅助稳定病情，减小复发风险，可以多吃芦笋，蘑菇，海产品等食物，也可以直接用西维康口嚼片等常见的免疫力增强制品
肝癌晚期吃虫草怎么吃？	肝癌晚期的患者，吃些虫草对身体是可以增强抵抗力的，吃虫草的方法可以泡水喝就行了，增加身体抵抗力，减轻临床症状。
肝癌晚期吃靶向药效果？	肝癌靶向药的选择一般是需要做基因检测的，如果有基因突变才可以使用靶向药物。而且在治疗的同时，患者也一定要有积极的心态，能够积极的配合医生制定的治疗方案，调解心情，养成良好的生活习惯。同时配合中药治疗来提高患者的体质。
肝癌晚期不停咳嗽吃什么药？	从叙述的情况看，肝癌晚期，最近咳嗽，检查没有转移，考虑是支气管炎或肺炎。如果拍片没有发现肿瘤，考虑是炎症导致的，可先选用适当的抗生素、止咳化痰的药物治疗，观察病情
肝癌晚期不能做手术的患者应该怎么办？	肝癌到了中晚期一般是无法治愈，我们需要做的是尽量延长患者的生存时间，改善患者的生存质量。索拉非尼针对特定基因型的患者会起到一定的作用，需要进行基因检测进行判断
肝癌晚期不能手术，保守治疗吃什么抗癌药有效	常见的药物有一大类就是化疗药，如铂类、氟尿嘧啶、蒽环类药物。另一类是靶向药，现在主要是索拉非尼，它可以抑制肿瘤的生长，也可以抑制肿瘤新生血管的形成
肝癌晚期不化疗想吃中药优质推荐？	需要根据病情状况具体咨询中医科医生，
肝癌晚期病人能不能吃灵芝	灵芝不能治疗肝癌，但对肝疗有一定的疗效。治疗肝癌在选择药物和治疗方式上也是很关健的，建议咨询住专科门诊
肝癌晚期伴有少量腹水，有中药能消除腹水吗	治疗腹水一般通过输注白蛋白利尿的方法减少腹水，还可以通过穿刺的方法将腹水引流出来，使用中医治疗的话请咨询中医科医生，
肝癌晚期白蛋白可以起作用吗?	肝癌患者晚期往往伴随肝功能下降，白蛋白低的问题，可以输注白蛋白加强营养，建议遵循医嘱
肝癌晚期靶向治疗的效果如何？	靶向药，现在主要是索拉非尼，它可以抑制肿瘤的生长，也可以抑制肿瘤新生血管的形成，详情请咨询肿瘤科。
肝癌晚期，做完介入治疗后可以吃中药吗	可以，中药常与其他疗法配合应用最好以提高机体免疫力，改善全身状况和症状减轻化疗放射治疗不良反应为主
肝癌晚期，中成药有哪些？	晚期并没有什么有效的中成药，常规的复方斑蝥胶囊、消癌平片、复生康胶囊、慈丹胶囊，在对于晚期肝癌来说，效果也都不是很好. 晚期肝癌患者最主要是以提高生活质量为首要目标
肝癌晚期，吃索拉非尼有用吗	肝癌到了中晚期一般是无法治愈，我们需要做的是尽量延长患者的生存时间，改善患者的生存质量。索拉非尼针对特定基因型的患者会起到一定的作用，需要进行基因检测进行判断
肝癌术前用吃靶向药吗？	肝癌的治疗最主要的还是通过手术的方式来切除病变部位，药物的治疗主要是起到辅助的效果，并杀死其余的癌细胞，常见的药物有一大类就是化疗药，如铂类、氟尿嘧啶、蒽环类药物。另一类是靶向药，现在主要是索拉非尼，它可以抑制肿瘤的生长，也可以抑制肿瘤新生血管的形成
肝癌术后是否要长期服用斑蝥胶囊？	参考一下药品说明书，有具体的适用症，禁忌，注意事项等，具体使用建议咨询中医科。
肝癌术后是否需要长期吃药？	需要到医院复查，根据具体情况在医生的指导下服用药物，一般来说达到临床治愈的疗效才能停药。
肝癌术后能吃多吉美吗？效果如何？	药物治疗主要用来杀死肿瘤细胞，具体效果需根据患者的病情身体状况等综合考量，建议就诊于专科门诊进行咨询
肝癌术后能吃布洛芬缓释胶囊吗？	布洛芬具有一定的止疼效果，可以用来对轻度疼痛进行止痛
肝癌术后吃什么药好	肝癌术后药物的治疗主要是起到辅助的效果，杀死其余的癌细胞，常见的药物有一大类就是化疗药，如铂类、氟尿嘧啶、蒽环类药物。另一类是靶向药，现在主要是索拉非尼，它可以抑制肿瘤的生长，抑制肿瘤新生血管的形成，来进行抗癌治疗。
肝癌术后pd1什么时候用？	PD1药物通过阻断肿瘤细胞PD-1/PD-L1信号通路，让免疫系统直接杀死癌细胞，具有治疗多种类型肿瘤的潜力。术后经过评估后，患者身体状况恢复后就可以使用。
肝癌手术之后要化疗吗？	肝癌的治疗最主要的还是通过手术的方式来切除病变部位，药物的治疗主要是起到辅助的效果，并杀死其余的癌细胞，常见的药物有一大类就是化疗药，如铂类、氟尿嘧啶、蒽环类药物。另一类是靶向药，现在主要是索拉非尼，它可以抑制肿瘤的生长，也可以抑制肿瘤新生血管的形成
肝癌手术后需要长期服药吗	药物的治疗主要是起到辅助的效果，并杀死其余的癌细胞，一般需要结合患者病情服用几个周期，具体需要服药多久需根据肿瘤科意见
肝癌手术后需要化疗吗	肝癌的治疗方案应依原发病而定。对肿瘤性肝癌则应根据病情给予手术切除、化疗、放疗或介入治疗。合理的肝功能检查，血常规检查，如果肝癌术后怕复发的话也可以进行长期应用抗癌药物
肝癌手术后需要放疗和化疗吗	肝癌的治疗方案应依原发病而定。对肿瘤性肝癌则应根据病情给予手术切除、化疗、放疗或介入治疗。合理的肝功能检查，血常规检查，如果肝癌术后怕复发的话也可以进行长期应用抗癌药物
肝癌手术后必须化疗吗？	药物的治疗主要是起到辅助的效果，并杀死其余的癌细胞，常见的药物有一大类就是化疗药，如铂类、氟尿嘧啶、蒽环类药物。具体化疗方案需至肿瘤科进行评估。
肝癌是怎么化疗的？	化疗，需要结合临床的情况来判断。如果不需要进行化疗的话，后期需定期进行复查。具体是否需要化疗需要根据主治医生的意见，结合病理情况判断。
肝癌切除了还要化疗吗？	是否是需要进行化疗，需要结合临床的情况来判断。如果不需要进行化疗的话，后期需定期进行复查。具体是否需要化疗需要根据主治医生的意见，结合病理情况判断。
肝癌能用物理热疗么？	肝癌的患者是可以做热疗的治疗的。肝癌的热疗主要是是通过全身加热或者是局部的加热的方法进行的。局部的加热和经导管动脉内化疗栓塞相结合 ,就是介入性热化疗 ,热疗能够有效的提高了治疗效果
肝癌目前靶向治疗现状	目前索拉非尼仍是有效治疗晚期肝癌的分子靶向药物。两项大型国际多中心 III 期临床试验均充分证明了索拉非尼对于不同国家地区、不同肝病背景的晚期肝癌都具有一定的生存获益。常规推荐用法为 400mg，一日两次，应用时需注意对肝功能的影响。最常见的不良反应为腹泻、体重下降、手足综合征、皮疹、心肌缺血以及高血压等，一般发生在治疗开始后的 2-6周内，可用于肝功能 Child A、B 级的病人。而相对于肝功能 Child B 级，ChildA 级的病人生存获益更明显。
肝癌可以用蟾蜍治吗?	中医药物的使用请在中医专业指导下使用。肝癌患者建议去正规医院就诊，完善相关检查，由医生评估病情，制定治疗方案。
肝癌可以化疗吗	是否是需要进行化疗，需要结合临床的情况来判断。如果不需要进行化疗的话，后期需定期进行复查。具体是否需要化疗需要根据主治医生的意见，结合病理情况判断。
肝癌可以打白蛋白加强营养吗	肝癌患者晚期往往伴随肝功能下降，白蛋白低的问题，可以输注白蛋白加强营养，建议遵循医嘱
肝癌介入术后的中药治疗	肝癌的治疗首选是手术治疗，对于无法手术的患者可以考虑介入或者放化疗，中药主要用于辅助治疗肝癌，提高机体免疫力，改善全身症状，没有治疗肝癌的特效中药
肝癌患者手术后一定要进行化疗吗？	是否是需要进行化疗，需要结合临床的情况来判断。如果不需要进行化疗的话，后期需定期进行复查。具体是否需要化疗需要根据主治医生的意见，结合病理情况判断。
肝癌患者适合做放疗化疗么？	是否是需要进行放化疗，需要结合临床的情况来判断。如果不需要进行放化疗的话，后期需定期进行复查。具体是否需要化疗需要根据主治医生的意见，结合病理情况判断。
肝癌患者是否需要服用灵芝？	灵芝不能治疗肝癌，但对肝疗有一定的疗效。治疗肝癌在选择药物和治疗方式上也是很关健的，建议咨询住专科门诊
肝癌患者能不能注射白蛋白	肝癌患者晚期往往伴随肝功能下降，白蛋白低的问题，可以输注白蛋白加强营养，建议遵循医嘱
肝癌患者感冒后用什么治疗方法？	因为肝癌患者晚期的抵抗力会下降，感冒后有可能造成较正常人更为严重的呼吸道症状，此时可以按照正常治疗感冒的方法进行处理，同时注意检测患者的身体状况，防止产生其他的并发症状。
肝癌患者服用靶向药副作用大怎么办	治疗癌症的靶向药物都会有一些恶心、呕吐、白细胞减少等副作用，如果出现这些副作用，说明病人抵抗能力比较差，副作用反应比较强烈的话，可以住院补液止吐或者是对症处理。
肝癌患者吃什么止疼药效果比较好？	癌症三级止痛，其中Ⅰ级止痛适用于一般疼痛。使用非麻醉止痛剂加减辅佐剂（非类固醇类）。Ⅱ级止痛适用于中度持续疼痛或疼痛加重。使用弱麻醉剂加减非麻醉止痛剂加减辅佐剂。Ⅲ级止痛适用于强烈持续疼痛。使用强麻醉剂加非麻醉止痛剂加辅佐剂。建议咨询疼痛科。
肝癌化疗有用吗	化疗主要用于肝癌无法进行手术或者手术后续治疗的患者，具体疗效需根据患者病情及身体状况、基因检测结果进行评估。
肝癌化疗效果如何	化疗主要用于肝癌无法进行手术或者手术后续治疗的患者，具体疗效需根据患者病情及身体状况、基因检测结果进行评估。
肝癌喝中药能治好吗？	肝癌的治疗首选是手术治疗，对于无法手术的患者可以考虑介入或者放化疗，中药主要用于辅助治疗肝癌，提高机体免疫力，改善全身症状，没有治疗肝癌的特效中药
肝癌喝中药可以吗？	肝癌的治疗首选是手术治疗，对于无法手术的患者可以考虑介入或者放化疗，中药主要用于辅助治疗肝癌，提高机体免疫力，改善全身症状，没有治疗肝癌的特效中药
肝癌骨转移用靶向药有用吗？	对于病情发展快，转移的患者，靶向药物治疗的效果不是很好，建议积极规范治疗是很关键的，在医生的指导下进行具体的治疗。
肝癌肝移植术后，是否必须化疗？	化疗主要用于肝癌无法进行手术或者手术后续治疗的患者，具体疗效需根据患者病情及身体状况、基因检测结果进行评估。
肝癌肝移植后需要化疗吗？	是否是需要进行放化疗，需要结合临床的情况来判断。如果不需要进行放化疗的话，后期需定期进行复查。具体是否需要化疗需要根据主治医生的意见，结合病理情况判断。
肝癌肝门区淋巴结转移怎么治疗？	首先考虑能否手术治疗；无法进行手术治疗的话可以考虑化疗或者介入治疗等其他治疗手段。
肝癌腹水吃什么中药能治腹水呢	治疗腹水一般通过输注白蛋白利尿的方法减少腹水，还可以通过穿刺的方法将腹水引流出来，使用中医治疗的话请咨询中医科医生，
肝癌腹水吃臌症丸有用吗？	臌症丸药效很好，比起利尿剂来说是中成药，副作用小，但是同样排水能力极强，具体的治疗还请根据主治医生决定
肝癌肺转移化疗有效果吗？	是否是需要进行放化疗，需要结合临床的情况来判断。如果不需要进行放化疗的话，后期需定期进行复查。具体是否需要化疗需要根据主治医生的意见，结合病理情况判断。
肝癌放疗疗化疗有什么区别？	放射治疗是指放射治疗，化疗是指化学药物。对于恶性肿瘤，有些对化疗更敏感，有些对放疗更敏感。放疗或化疗不能一概而论，但放疗和化疗会产生一些副作用。建议同时服用抗癌中药，避免疾病过度恶化。患者能保持良好的心态，积极配合医生的治疗。
肝癌放疗会很痛苦吗	根据病情的不同，放疗的次数、程度会有所不同，一般来说不会很痛苦，建议咨询专科门诊
肝癌肚胀吃什么中药？	肚胀可能是因为腹水过多所致，具体请咨询中医科医生
肝癌的治疗偏方	肝癌到了中晚期一般是无法治愈，我们需要做的是尽量延长患者的生存时间，改善患者的生存质量。
肝癌的止痛药什么	癌症三级止痛，其中Ⅰ级止痛适用于一般疼痛。使用非麻醉止痛剂加减辅佐剂（非类固醇类）。Ⅱ级止痛适用于中度持续疼痛或疼痛加重。使用弱麻醉剂加减非麻醉止痛剂加减辅佐剂。Ⅲ级止痛适用于强烈持续疼痛。使用强麻醉剂加非麻醉止痛剂加辅佐剂。建议咨询疼痛科。
肝癌的四大靶向药物都是哪些？	索拉非尼（多吉美）；瑞格非尼（Regorafenib）；乐伐替尼(Lenvatinib,E7080)；纳武单抗（Opdivo）
肝癌的生物和免疫治疗	肝癌晚期可以用生物免疫治疗方法 生物疗法是运用生物技术和生物制剂对从病人体内采集的免疫细胞进行体外培养和扩增后回输到病人体内的方法，来激发、增强机体自身免疫功能，从而达到治疗肿瘤的目的。
肝癌的人吃肝复乐片好还是吃肝复乐胶囊好	肝复乐片及肝复乐胶囊均是中成药，其成分相同，有党参、鳖甲、重楼、黄芪、大黄、柴胡、桃仁、土鳖虫等二十一味，适用于肝瘀脾虚为主证的原发性肝癌，症见上腹肿块，胁肋疼痛，神疲乏力，食少纳呆，脘腹胀满，心烦易怒，口苦咽干等；具体使用请根据专科门诊医生建议使用。
肝癌打什么针好？	肝癌的治疗最主要的还是通过手术的方式来切除病变部位，药物的治疗主要是起到辅助的效果，并杀死其余的癌细胞，常见的药物有一大类就是化疗药，如铂类、氟尿嘧啶、蒽环类药物。另一类是靶向药，现在主要是索拉非尼，它可以抑制肿瘤的生长，也可以抑制肿瘤新生血管的形成
肝癌吃中药能控制吗	肝癌的治疗首选是手术治疗，对于无法手术的患者可以考虑介入或者放化疗，中药主要用于辅助治疗肝癌，提高机体免疫力，改善全身症状，没有治疗肝癌的特效中药
肝癌吃玉米肽有用吗	建议使用中药调理延长生命。新鲜水果和蔬菜每天都要吃。提高患者免疫力预防感冒
肝癌吃索拉非尼的效果怎么样？	索拉非尼是种治疗肝癌的靶向药物，针对特定的肿瘤患者人群具有一定效果，具体疗效需要爱根据患者的身体状况，病情发展，基因检测情况进行评估，具体请咨询专科医生。
肝癌吃什么中药最好?	肝癌的治疗首选是手术治疗，对于无法手术的患者可以考虑介入或者放化疗，中药主要用于辅助治疗肝癌，提高机体免疫力，改善全身症状，没有治疗肝癌的特效中药
肝癌吃什么中成药	肝癌的治疗首选是手术治疗，对于无法手术的患者可以考虑介入或者放化疗，中药主要用于辅助治疗肝癌，提高机体免疫力，改善全身症状，没有治疗肝癌的特效中药
肝癌吃什么止痛药？	癌症三级止痛，其中Ⅰ级止痛适用于一般疼痛。使用非麻醉止痛剂加减辅佐剂（非类固醇类）。Ⅱ级止痛适用于中度持续疼痛或疼痛加重。使用弱麻醉剂加减非麻醉止痛剂加减辅佐剂。Ⅲ级止痛适用于强烈持续疼痛。使用强麻醉剂加非麻醉止痛剂加辅佐剂。建议咨询疼痛科。
肝癌吃什么药能够治疗或者降低胆红素？	降低胆红素的药物，有思美泰和优思弗等药物
肝癌吃什么药	肝癌的治疗最主要的还是通过手术的方式来切除病变部位，药物的治疗主要是起到辅助的效果，并杀死其余的癌细胞，常见的药物有一大类就是化疗药，如铂类、氟尿嘧啶、蒽环类药物。另一类是靶向药，现在主要是索拉非尼，它可以抑制肿瘤的生长，也可以抑制肿瘤新生血管的形成
肝癌吃什么好？肝癌患者应当吃些什么药啊？	肝癌的治疗最主要的还是通过手术的方式来切除病变部位，药物的治疗主要是起到辅助的效果，并杀死其余的癌细胞，常见的药物有一大类就是化疗药，如铂类、氟尿嘧啶、蒽环类药物。另一类是靶向药，现在主要是索拉非尼，它可以抑制肿瘤的生长，也可以抑制肿瘤新生血管的形成
肝癌吃什么草药？	肝癌的治疗首选是手术治疗，对于无法手术的患者可以考虑介入或者放化疗，中药主要用于辅助治疗肝癌，提高机体免疫力，改善全身症状，没有治疗肝癌的特效中药
肝癌吃多久中药？	使用中医治疗主要是对症治疗及放化疗的辅助治疗，具体吃多久的中药需要根据患者的具体状况，咨询中医科的医生。
肝癌吃靶向药的副作用?	治疗癌症的靶向药物都会有一些恶心、呕吐、白细胞减少等副作用，如果出现这些副作用，说明病人抵抗能力比较差，副作用反应比较强烈的话，可以住院补液止吐或者是对症处理。
肝癌病人声音沙哑是什么原因?如何治疗？	原因多样，有可能是因为肿瘤转移或者侵犯神经，需经过专科门诊进行检查后来判断原因。根据具体的病因来进行对症处理。
肝癌病人感冒发烧吃什么退烧药？	一般来说对症处理即可，肝癌患者发烧有可能是因为感冒引起的炎症反应，还有可能是因为肿瘤原因引起的发热，需要具体情况具体分析。
肝癌病人吃什么止痛药	癌症三级止痛，其中Ⅰ级止痛适用于一般疼痛。使用非麻醉止痛剂加减辅佐剂（非类固醇类）。Ⅱ级止痛适用于中度持续疼痛或疼痛加重。使用弱麻醉剂加减非麻醉止痛剂加减辅佐剂。Ⅲ级止痛适用于强烈持续疼痛。使用强麻醉剂加非麻醉止痛剂加辅佐剂。建议咨询疼痛科。
肝癌病人吃肝复乐胶囊有效果吗	肝复乐片及肝复乐胶囊均是中成药，其成分相同，有党参、鳖甲、重楼、黄芪、大黄、柴胡、桃仁、土鳖虫等二十一味，适用于肝瘀脾虚为主证的原发性肝癌，症见上腹肿块，胁肋疼痛，神疲乏力，食少纳呆，脘腹胀满，心烦易怒，口苦咽干等；具体使用请根据专科门诊医生建议使用。
肝癌保守治疗什么意思?	保守治疗就是不要做任何手术类治疗的其他治疗。包括放化疗、介入治疗、免疫治疗、生物治疗等。
肝癌靶向治疗有效果吗?	肝癌的治疗最主要的还是通过手术的方式来切除病变部位，药物的治疗主要是起到辅助的效果，并杀死其余的癌细胞，常见的药物有一大类就是化疗药，如铂类、氟尿嘧啶、蒽环类药物。另一类是靶向药，现在主要是索拉非尼，它可以抑制肿瘤的生长，也可以抑制肿瘤新生血管的形成
肝癌靶向治疗需要基因检测吗？	通过基因检测，可以提示我们哪些药物要慎用，大大地降低不必要的医疗支出，提高了疗效，避免了对人体造成更大的伤害。
肝癌靶向药最全汇总	目前的四大靶向药物索拉非尼（多吉美）；瑞格非尼（Regorafenib）；乐伐替尼(Lenvatinib,E7080)；纳武单抗（Opdivo）。其余的建议遵循NCCN指南查询
肝癌靶向药怎么服？	肝癌靶向药的选择一般是需要做基因检测的，如果有基因突变才可以使用靶向药物。而且在治疗的同时，患者也一定要有积极的心态，能够积极的配合医生制定的治疗方案，调解心情，养成良好的生活习惯。同时配合中药治疗来提高患者的体质。
肝癌靶向药有用吗?	靶向治疗是指以标准化的生物标记物来识别是否存在某种疾病特定的控制肿瘤生长的基因或基因谱，以此确定针对特异性靶点的治疗方法。常用药物有索拉非尼，乐伐替尼
肝癌靶向药有哪些	目前的四大靶向药物索拉非尼（多吉美）；瑞格非尼（Regorafenib）；乐伐替尼(Lenvatinib,E7080)；纳武单抗（Opdivo）。其余的建议遵循NCCN指南查询
肝癌靶向药的种类	目前的四大靶向药物索拉非尼（多吉美）；瑞格非尼（Regorafenib）；乐伐替尼(Lenvatinib,E7080)；纳武单抗（Opdivo）。其余的建议遵循NCCN指南查询
肝癌，中医中药治疗有效吗？	肝癌的治疗首选是手术治疗，对于无法手术的患者可以考虑介入或者放化疗，中药主要用于辅助治疗肝癌，提高机体免疫力，改善全身症状，没有治疗肝癌的特效中药
服用维生素C能延长肝癌患者寿命吗？	可以改善患者的生命状况，但并无法延长患者的生存期
恩替卡韦片对肝癌有帮助吗？	恩替卡韦主要是针对乙型肝炎病毒起作用，而乙肝容易导致肝癌。可以在治疗肝癌的同时进行抗病毒治疗。
多发性肝癌吃中药能治疗吗？	肝癌的治疗首选是手术治疗，对于无法手术的患者可以考虑介入或者放化疗，中药主要用于辅助治疗肝癌，提高机体免疫力，改善全身症状，没有治疗肝癌的特效中药
得了肝癌可以用中药治疗吗？	肝癌的治疗首选是手术治疗，对于无法手术的患者可以考虑介入或者放化疗，中药主要用于辅助治疗肝癌，提高机体免疫力，改善全身症状，没有治疗肝癌的特效中药
到了肝癌晚期吃中药能治好吗	肝癌到了中晚期一般是无法治愈，我们需要做的是尽量延长患者的生存时间，改善患者的生存质量。
胆管癌晚期化疗有用吗?	是否是需要进行放化疗，需要结合临床的情况来判断。如果不需要进行放化疗的话，后期需定期进行复查。具体是否需要化疗需要根据主治医生的意见，结合病理情况判断。
胆管癌病人使用白蛋白有什么作用？	肝癌患者晚期往往伴随肝功能下降，白蛋白低的问题，可以输注白蛋白加强营养，建议遵循医嘱
穿山甲对肝癌肝硬化有用吗	穿山甲主治积聚，血瘀经闭，乳汁不通，痈肿，瘰疬，痰核，风湿痹痛，中风瘫痪，疥癣，风癞。对肝功能并没有很大的帮助。但可以适量滋补下身体，加强免疫力，请遵医嘱使用
穿山甲对肝癌的作用？	穿山甲主治积聚，血瘀经闭，乳汁不通，痈肿，瘰疬，痰核，风湿痹痛，中风瘫痪，疥癣，风癞。对肝功能并没有很大的帮助。但可以适量滋补下身体，加强免疫力，请遵医嘱使用
吃什么中药能治疗肝癌晚期优质推荐？	肝癌晚期的治疗最好以提高机体免疫力，改善全身状况，和症状，减轻化疗放射治疗不良反应为主，无治疗肝癌的特效药物
蟾蜍对肝癌晚期有做用吗	请在有经验的中医指导下使用。
蟾蜍对肝癌晚期有效吗？	中医药物的使用请在中医专业指导下使用。
奥沙利铂主治什么能否用于肝癌	奥沙利铂是一种化疗药物，具体是否适合患者使用需根据患者的状况去专科门诊进行诊疗
艾坦靶向药治疗肝癌吗？	艾坦阿帕替尼作为小分子抗血管生成类靶向药物，在多瘤种上有着很好的临床运用和治疗效果。首先，肝癌作为富血供的恶性肿瘤，抗血管生成药物可以抑制肿瘤血管的再生并使其退化，从而切断类恶性肿瘤生长和转移的供给源，以完成抗癌治疗。
癌症病人有乙肝能化疗吗	可以进行化疗，同时建议进行抗病毒治疗。详情请咨询专科门诊意见
阿司匹林可以显著降低肝癌发病率吗	阿司匹林是一种抗血小板药物，主要用来预防血栓形成，并不会影响肝癌的发病率
k药对肝癌无效怎么办？	肝癌的治疗最主要的还是通过手术的方式来切除病变部位，药物的治疗主要是起到辅助的效果，并杀死其余的癌细胞，常见的药物有一大类就是化疗药，如铂类、氟尿嘧啶、蒽环类药物。另一类是靶向药，现在主要是索拉非尼，它可以抑制肿瘤的生长，也可以抑制肿瘤新生血管的形成
83岁老人肝癌晚期怎么治疗？	肝癌到了中晚期一般是无法治愈，我们需要做的是尽量延长患者的生存时间，改善患者的生存质量。具体的化疗药物需要进行基因检测进行判断
怎样消除腹水？肝癌晚期	肝腹水亦称为肝硬化腹水，主要是由于长期受到各种肝脏疾病的影响，导致肝质变硬，形成肝硬化。肝硬化致使肝功能减退，对蛋白质和维生素的不吸收而渗漏出的蛋白液，形成了肝腹水，对身体有着严重的影响。因此可以进行腹水的定时抽取，降低腹压，减轻腹胀症状
怎么缓解肝癌晚期皮下出血的情况？	皮下出血是由于肝功能受损、凝血功能异常引起的，建议检查凝血功能，输注血小板或其他措施对症治疗
原发性肝癌治疗后后背疼痛怎么搞	在治疗过程中，为了减轻肝癌患者的疼痛，传统的措施是采用三阶梯镇痛法，使用镇痛药物止痛，在短时间内缓解患者的疼痛，针对患者的个体差异，施以相应的心理疏导、转移注意力、制订锻炼方案、规范起居饮食习惯等护理措施。
原发性肝癌术后最近浑身无力是怎么回事？	需要注意肝功能的情况，其次是否有感冒，需要去医院行检查了解。而且要定期复查了解自身的情况。
原发性肝癌出现持续性低血糖怎么治疗	肝癌引起的低血糖考虑是肝癌所改肝糖原输出量减少引起的反复的低血糖，治疗上以治疗原发病为主，同时要加强饮食
原发性肝癌伴低血糖的原因及处理	肝癌引起的低血糖考虑是肝癌所改肝糖原输出量减少引起的反复的低血糖，治疗上以治疗原发病为主，同时要加强饮食
我想问肝癌晚期腹水抽水越抽越多吗，只能抽三次吗	肝癌患者出现腹水的症状如果采用抽水的方式进行治疗会给患者带来痛苦，只是把肚子里面的水抽出来，不能从根本上进行治疗，从肿瘤本身入手，抑制肿瘤生长才是治疗根本。所以患者应该积极治疗，保证良好的生活规律，和平和的心态。
我是一名肝癌晚期患者，老是失眠，怎么办？	肝癌患者出现失眠的现象，因为肝癌患者多数情绪焦虑或者是抑郁，导致心里紧张和脆弱，再加上身体虚弱，会造成失眠的现象。建议配合催眠药物治疗，具体可至专科门诊进行诊疗
我奶奶是肝癌晚期，恶心干呕特别严重，有没有什么药物能缓解？	肝癌一般会因为便秘、肠梗阻、颅内压增高、高钙血症、尿毒症等，恐怖和焦虑对高级神经中枢的刺激等原因会引起恶心和呕吐。这时去医院就诊对症处理
我哥哥是肝癌晚期，现在经常发低烧，该怎么处理呢？	肝癌病人主要表现为乏力、消瘦、食欲减退、腹胀等。部分病人可伴有恶心、呕吐、发热、腹泻等症状，抵抗力降低，或肝癌细胞进入血液作为致热源引起发热。患者亦容易高烧，可选用肝毒性较小的药物进行退热治疗
我哥哥肝癌晚期上腹部胀气，能不能怎样减少一点痛苦呢？	建议清淡饮食，不要食用产气类食物。还可以使用一些镇痛药物，对症处理，具体可至专科门诊进行评估
我父亲肝癌晚期胃胀能针灸吗	肝癌导致肝功能的损害会出现消化道症状，比如食欲不振，腹胀等症状；2、肝癌腹水，当大量腹水会出现腹胀。3、癌症腹腔转移出现肠道压迫狭窄导致腹胀等。针灸治疗会有一定的效果，但是还是建议找出病因，比如是大量腹水导致的腹胀，腹腔穿刺引流腹水后可得到很好的缓解
我父亲肝癌晚期没有精神，听说有一种针可以改善？	肿瘤晚期患者主要以改善患者状况，提高患者生活质量为主，可以打营养针，适当补充营养，改善患者状况，具体用药情况于医院就诊，询问您的主管大夫。
我父亲肝癌晚期肚子腹水现在很涨很难受应该怎么缓解	肝腹水亦称为肝硬化腹水，主要是由于长期受到各种肝脏疾病的影响，导致肝质变硬，形成肝硬化。肝硬化致使肝功能减退，对蛋白质和维生素的不吸收而渗漏出的蛋白液，形成了肝腹水，对身体有着严重的影响。因此可以进行腹水的定时抽取，降低腹压，减轻腹胀症状
我父亲肝癌患者如厕大便出血求解决方案	可能是消化道出血，属于食管胃底静脉曲张破裂出血的可能性比较大。应该尽快到医院就诊。需要手术压迫止血，如果出血量太大，还需要输血治疗。目前需要禁食水。
我父亲肝癌腹水已抽了9次水还能抽吗？	肝癌患者出现腹水的症状如果采用抽水的方式进行治疗会给患者带来痛苦，只是把肚子里面的水抽出来，不能从根本上进行治疗，从肿瘤本身入手，抑制肿瘤生长才是治疗根本。所以患者应该积极治疗，保证良好的生活规律，和平和的心态。
晚期肝癌治疗后肝区疼痛怎么办	癌症不论近期和远期都会有疼痛的出现，在积极治疗原发病如手术治疗、介入治疗等的同时，对于疼痛，可以施行三级疼痛治疗。建议疼痛科就诊，明确诊断，对症治疗
晚期肝癌患者打白蛋白有什么作用吗？	白蛋白是肝脏合成的一种重要的血清蛋白成分，具有营养、携带体内物质成分、维持渗透压等功能，但不提高机体免疫力。肝癌患者晚期往往伴随肝功能下降，白蛋白低的问题，可以根据患者白蛋白水平及具体病情判断是否需要输注白蛋白。
晚期肝癌病人发烧不退能治吗	可能是肿瘤本身引起的，也有可能是有局部坏死等原因引起的。如果体温高于38度5，可以用退热的药，另外可以温水擦浴，适当多喝点水，也有退热作用
如何解决肝癌晚期脸部浮肿？	肝癌晚期患者出现脸部浮肿症状，说明病情比较严重，要及时通过饮食来给患者调理，保持平衡的膳食，同时还要要求患者多吃一些新鲜的蔬菜水果。饮食也要以高热量高蛋白为主，能增强患者的抵抗力。也可以用一些消肿利尿的药物进行治疗。
如何减轻肝癌晚期病人痛苦	癌症三级止痛，其中Ⅰ级止痛适用于一般疼痛。使用非麻醉止痛剂加减辅佐剂（非类固醇类）。Ⅱ级止痛适用于中度持续疼痛或疼痛加重。使用弱麻醉剂加减非麻醉止痛剂加减辅佐剂。Ⅲ级止痛适用于强烈持续疼痛。使用强麻醉剂加非麻醉止痛剂加辅佐剂。建议咨询疼痛科。
如何缓解肝癌带来的疼痛	如果是肝癌晚期导致疼痛的话，这种情况治疗上主要是止痛对症治疗。止痛药物一般选择阿片类的药物。比如吗啡等药物。保持情绪稳定,焦虑的情绪易引起疼痛加深。如果没法保持镇定,也可以采取转移注意力的方法来缓解疼痛,比如读报、看电视等等。
您好，肝癌晚期转肺癌病人口干吃什么药	癌肿后期体内液体消耗以致体液不足的表现，以上的情况服药往往是无效的，需要结合水电解质的检查配合补液治疗
你好我想问一下肝癌介入治疗第二次为什么疼痛更厉害	腹部疼痛，可能有多种因素引起，介入后腹部疼痛多为为术后并发症，在医生的指导下药物、物理治疗，并进一步检查，明确疼痛部位。
你好！我家人刚检查出肝癌晚期，晚上疼痛的睡不着，怎么治疗	在治疗过程中，为了减轻肝癌患者的疼痛，传统的措施是采用三阶梯镇痛法，使用镇痛药物止痛，在短时间内缓解患者的疼痛，针对患者的个体差异，施以相应的心理疏导、转移注意力、制订锻炼方案、规范起居饮食习惯等护理措施。
巨块型肝癌晚期疼痛？	如果是肝癌晚期导致疼痛的话，这种情况治疗上主要是止痛对症治疗。止痛药物一般选择阿片类的药物。比如吗啡等药物。保持情绪稳定,焦虑的情绪易引起疼痛加深。如果没法保持镇定,也可以采取转移注意力的方法来缓解疼痛,比如读报、看电视等等。
肝肿瘤破裂还能治吗？	可以治疗的。一般情况下恶性肿瘤，首先要考虑手术治疗，只有手术治疗才能得到根治。同时需要配合化疗，放疗，免疫治疗，靶向药物治疗，生物治疗，肝细胞移植，微波消融治疗，介入治疗等等，治疗方法很多，需要联合治疗。防止肿瘤的复发。才可以延长寿命。
肝肿瘤破裂出血怎么治？	一般情况下恶性肿瘤，首先要考虑手术治疗，只有手术治疗才能得到根治。同时需要配合化疗，放疗，免疫治疗，靶向药物治疗，生物治疗，肝细胞移植，微波消融治疗，介入治疗等等，治疗方法很多，需要联合治疗，防止肿瘤的复发，延长寿命。
肝硬化有腹水并肝癌能做手术吗？	肝癌腹水是肝癌最常见的并发症之一，需要根据病情经过手术医生及麻醉医生进行评估，来确定患者能否有手术机会
肝硬化肝癌病人术后刀口不愈合老是流水每天越来越多怎么办	这是脂肪液化的表现，需要即使对伤口换药，保持伤口干燥，等待伤口自行愈合
肝硬化腹水肝癌怎么办	肝腹水亦称为肝硬化腹水，主要是由于长期受到各种肝脏疾病的影响，导致肝质变硬，形成肝硬化。肝硬化致使肝功能减退，对蛋白质和维生素的不吸收而渗漏出的蛋白液，形成了肝腹水，对身体有着严重的影响。因此可以进行腹水的定时抽取，降低腹压，减轻腹胀症状
肝硬化，肝癌，右下腹晚上睡觉翻身很痛，怎么办	肝脏上出现肿瘤以后，就会影响到肝脏的正常功能，并且癌肿瘤或癌细胞会压迫到或刺激到正常的肝癌细胞，使其不能像以前一样正常生长，就会让患者感到肝脏不适，产疼痛等症状，由于疼痛会因肿瘤生长的部位不同而有所变化。可使用一定的镇痛药物，就诊于专科门诊进行处理。
肝癌做微创手术后经常放屁好吗	一般腹部微创手术后肠道动力会暂时受影响，肝癌手术对肠道的侵扰及损伤时有限的，术后放屁说明说明胃肠蠕动正常，是一个术后恢复的好的迹象。
肝癌做完介入后发烧是什么原因	肝癌晚期介入术后患者抵抗力下降，易感染，患者亦容易发热，可选用肝毒性较小的药物进行退热治疗，并进一步检查明确病因治疗
肝癌做了三次介入治疗后为什么还会出现腹水	肝腹水亦称为肝硬化腹水，主要是由于长期受到各种肝脏疾病的影响，导致肝质变硬，形成肝硬化。肝硬化致使肝功能减退，对蛋白质和维生素的不吸收而渗漏出的蛋白液，形成了肝腹水，对身体有着严重的影响。介入手术后腹水大量增加，应及时进行减腹水治疗。
肝癌做介入手术后发烧怎么办？	肝癌晚期介入术后患者抵抗力下降，易感染，患者亦容易发热，可选用肝毒性较小的药物进行退热治疗，并进一步检查明确病因治疗
肝癌总胆红素高怎么降？	肝癌总胆红素高要服用降低胆红素的药物，及时的在医院检查清楚后，明确好病因再对症治疗，要在医院进行进一步的药物搭配，还要听从医生的嘱咐去做好饮食的调理，平时生活上就要多注意饮食及休息
肝癌总打嗝怎么办	肝癌是消化系统比较常见的恶性肿瘤，早期没有明显的临床症状，多见于乙肝和丙肝患者。随着肿瘤的增大，可以出现上腹部疼痛，恶心，呕吐，黄疸等不同的临床症状打嗝不能排除是癌细胞侵犯到膈神经而引起，建议还是及时就诊，医生会根据患者的具体病情采取相应的治疗措施。
肝癌肿瘤破裂怎么治？	一般情况下恶性肿瘤，首先要考虑手术治疗，只有手术治疗才能得到根治。同时需要配合化疗，放疗，免疫治疗，靶向药物治疗，生物治疗，肝细胞移植，微波消融治疗，介入治疗等等，治疗方法很多，需要联合治疗，防止肿瘤的复发，延长寿命。
肝癌早期有腹水吗？	肝癌腹水是肝癌最常见的并发症之一，肝癌患者出现腹水主要是由于慢性肝功能受损，使白蛋白合成减少，血浆胶体渗透压下降或门静高压致细胞内外水液代谢失衡，细胞内的水液向细胞外流失而成腹水。
肝癌早期的疼痛怎么办？	在治疗过程中，为了减轻肝癌患者的疼痛，传统的措施是采用三阶梯镇痛法，使用镇痛药物止痛，在短时间内缓解患者的疼痛，针对患者的个体差异，施以相应的心理疏导、转移注意力、制订锻炼方案、规范起居饮食习惯等护理措施。
肝癌引起的胃胀怎么办？	肝癌病人常伴有消化功能减退的表现，出现腹胀比较常见，一方面要在体力承受范围内适当活动，另一方面要针对病情给予必要的治疗。
肝癌现在肚子里面有腹水怎么办	肝腹水亦称为肝硬化腹水，主要是由于长期受到各种肝脏疾病的影响，导致肝质变硬，形成肝硬化。肝硬化致使肝功能减退，对蛋白质和维生素的不吸收而渗漏出的蛋白液，形成了肝腹水，对身体有着严重的影响。因此可以进行腹水的定时抽取，降低腹压，减轻腹胀症状
肝癌下肢水肿怎么办	肝是肝脏功能受损的表现,可以引起低蛋白血症,门静脉高压,下腔静脉回流障碍等均可导致下肢水肿.建议检查肝功能,电解质,凝血系列等检查,积极对症治疗,才能改善缓解症状.
肝癌晚期左肩疼痛，怎么缓解	在治疗过程中，为了减轻肝癌患者的疼痛，传统的措施是采用三阶梯镇痛法，使用镇痛药物止痛，在短时间内缓解患者的疼痛，针对患者的个体差异，施以相应的心理疏导、转移注意力、制订锻炼方案、规范起居饮食习惯等护理措施。
肝癌晚期嘴发苦，吃饭什么味也没有该怎么办	肝癌晚期患者出现这种现象主要是肿瘤对胃部挤压造成的，并刺激胃部出现相关表现，同时，不排除食管胃底静脉曲张的影响，可进行相关专科检查，明确病因，早诊断，早治疗。
肝癌晚期有腹水特别难受怎么治疗？	肝腹水亦称为肝硬化腹水，主要是由于长期受到各种肝脏疾病的影响，导致肝质变硬，形成肝硬化。肝硬化致使肝功能减退，对蛋白质和维生素的不吸收而渗漏出的蛋白液，形成了肝腹水，对身体有着严重的影响。因此可以进行腹水的定时抽取，降低腹压，减轻腹胀症状
肝癌晚期眼睛疼的厉害怎么办	在治疗过程中，为了减轻肝癌患者的疼痛，传统的措施是采用三阶梯镇痛法，使用镇痛药物止痛，在短时间内缓解患者的疼痛，针对患者的个体差异，施以相应的心理疏导、转移注意力、制订锻炼方案、规范起居饮食习惯等护理措施。
肝癌晚期血压低该如何处理?	低血压可导致多种并发症。但是并不是所有的低血压都很严重。如果血压低导致患者昏迷等，则需要尽快拨打120急诊抢救。如果患者平素血压就低，我们可以在安全的情况下进行观察。不能简单的观察血压的数值，建议积极就诊寻找低血压的原因，从根本上发现并解决问题。
肝癌晚期消化道出血严重吗	如果出现肝癌晚期的话，并且出现了消化道出血，说明病情已经比较严重了，当无法止血时，或者大量出血时，则可能导致生命危险。
肝癌晚期现在出现尿黄用什么药好	肝癌总胆红素高要服用降低胆红素的药物，还要听从医生的嘱咐去做好饮食的调理，平时生活上就要多注意休息及饮食
肝癌晚期下肢浮肿怎么办？	肝是肝脏功能受损的表现,可以引起低蛋白血症,门静脉高压,下腔静脉回流障碍等均可导致下肢水肿.建议检查肝功能,电解质,凝血系列等检查,积极对症治疗,才能改善缓解症状.
肝癌晚期腿脚肿的厉害，怎么消	肝是肝脏功能受损的表现,可以引起低蛋白血症,门静脉高压,下腔静脉回流障碍等均可导致下肢水肿.建议检查肝功能,电解质,凝血系列等检查,积极对症治疗,才能改善缓解症状.
肝癌晚期吐血拉血怎么办	这是肿瘤晚期的的表现，说明有消化道出血症状，需及时到医院就诊，对症处理，必要时输注红细胞改善贫血状况，延长病人的生存时间
肝癌晚期突然疼的厉害怎么办？	如果是肝癌晚期导致疼痛的话，这种情况治疗上主要是止痛对症治疗。止痛药物一般选择阿片类的药物。比如吗啡等药物。保持情绪稳定,焦虑的情绪易引起疼痛加深。如果没法保持镇定,也可以采取转移注意力的方法来缓解疼痛,比如读报、看电视等等。
肝癌晚期疼痛怎么缓解？	如果是肝癌晚期导致疼痛的话，这种情况治疗上主要是止痛对症治疗。止痛药物一般选择阿片类的药物。比如吗啡等药物。保持情绪稳定,焦虑的情绪易引起疼痛加深。如果没法保持镇定,也可以采取转移注意力的方法来缓解疼痛,比如读报、看电视等等。
肝癌晚期疼痛应该怎么办	如果是肝癌晚期导致疼痛的话，这种情况治疗上主要是止痛对症治疗。止痛药物一般选择阿片类的药物。比如吗啡等药物。保持情绪稳定,焦虑的情绪易引起疼痛加深。如果没法保持镇定,也可以采取转移注意力的方法来缓解疼痛,比如读报、看电视等等。
肝癌晚期疼痛难忍，怎么样止痛？	如果是肝癌晚期导致疼痛的话，这种情况治疗上主要是止痛对症治疗。止痛药物一般选择阿片类的药物。比如吗啡等药物。保持情绪稳定,焦虑的情绪易引起疼痛加深。如果没法保持镇定,也可以采取转移注意力的方法来缓解疼痛,比如读报、看电视等等。
肝癌晚期疼痛脚肿怎么办	肝癌患者晚期症状明显，常出现肝脏疼痛呈进行性，疼痛往往难以忍受，因此可以选择药物治疗或手术治疗
肝癌晚期失眠怎么治？	肝癌患者出现失眠的现象，因为肝癌患者多数情绪焦虑或者是抑郁，导致心里紧张和脆弱，再加上身体虚弱，会造成失眠的现象。可以使用一定的安眠药物，具体可至专科门诊进行评估。
肝癌晚期如何缓解疼痛	癌症不论近期和远期都会有疼痛的出现，在积极治疗原发病如手术治疗、介入治疗等的同时，对于疼痛，可以施行三级疼痛治疗。建议疼痛科就诊，明确诊断，对症治疗
肝癌晚期全身痒怎么办？	肝癌晚期全身痒主要是因为血液中胆红素水平过高，导致的全身瘙痒。主要治疗首先应为对症治疗，但患者处于癌症晚期的话，治疗原则以改善患者症状为主，可以使用一定的镇疼药物，可至专科门诊进行评估
肝癌晚期屁股骨头疼，难以行走，怎么办	在治疗过程中，为了减轻肝癌患者的疼痛，传统的措施是采用三阶梯镇痛法，使用镇痛药物止痛，在短时间内缓解患者的疼痛，针对患者的个体差异，施以相应的心理疏导、转移注意力、制订锻炼方案、规范起居饮食习惯等护理措施。
肝癌晚期皮下出血怎么办？	是由于肝功能受损、凝血功能异常引起的，建议检查凝血功能，应用生物免疫治疗或输注血小板
肝癌晚期皮下出血严重吗	是由于肝功能受损、凝血功能异常引起的，建议检查凝血功能，应用生物免疫治疗或输注血小板
肝癌晚期排尿困难怎么办？	肝癌晚期的患者，首先是需要明确是有小便不能自解，或是无尿，或是少尿等情况，如果有小便不能自解的话，考虑是尿潴留，此时是需要及时的导尿的，如果是少尿，或是无尿的话，考虑是肝肾综合症导致的，此时肾功能衰竭，建议及时的就诊检查，医生根据具体的情况来处理
肝癌晚期老是咳嗽怎么解决	肝癌晚期，那么这个时候，总是出现有咳嗽的情况，不排除可能是由于出现有肺转移的情况。建议还是需要结合临床的情况来针对性的判断检查一下具体的咳嗽的原因。也有可能是由于受凉或者是炎症刺激导致的。所以这个时候还是需要排查
肝癌晚期老是出汗怎么办	可以就诊于相应医院对症处理。除药物治疗外，平时应注意少吃瓜果食品，生活休息要有规律，尽量不要经常熬夜和频繁性生活。
肝癌晚期拉肚子怎么治疗	肝痛,纳差,乏力,消瘦,腹胀,腹块,发热,黄疸等为肝癌常见的症状,但这些大多已属中晚期症状,肝癌晚期拉肚子它可因肝癌合并肝功能障碍或合并门静脉栓所引起的.主要对症治疗处理腹泻，可至专科门诊进行处理。
肝癌晚期拉不出大便怎么办	肝癌晚期已经发生转移和扩散，造成胃肠功能紊乱可以采用对症治疗，灌肠或者开塞露塞肛门
肝癌晚期扩散消瘦需要怎么治疗	肝癌属于一类消耗性疾病，长期的摄入过少，负氮平衡，会使病人能量消耗大于摄入能量，患者晚期出现贫血、消瘦、及恶病质，体重下降迅速。肝癌晚期可以采取化疗，放射治疗，靶向药物治疗，同时结合抗肿瘤中药调理。我们需要找到引起消瘦的原因，对症对因治疗。
肝癌晚期咳嗽出血怎么办呢？	肝癌患者出现咽痛，咳嗽可能是由于肝癌转移导致的。肝癌出现转移，要根据患者的体质情况做出相应的治疗方法选择。 可能是由于肝功能受损、凝血功能异常引起的，建议检查凝血功能，应用生物免疫治疗或输注血小板
肝癌晚期介入治疗后持续发烧怎么办？	肝癌晚期介入术后患者抵抗力下降，易感染，患者亦容易发热，可选用肝毒性较小的药物进行退热治疗，并进一步检查明确病因治疗
肝癌晚期介入手术后有两次感觉肝部有不适感，怎么办	首先要考虑是否为其他原发疾病，例如：胃肠道的急症，肾结石，胆结石，原发性肌肉劳损，运动性肌肉损伤、肝癌骨转移或其他部位的转移等都可以导致身体疼痛不适。肝癌所导致的身体疼痛一般考虑肿瘤生长牵扯肝包膜所产生的牵涉痛或内脏痛。具体的疼痛时间是不确定的，有的可以很早期就开始，也有患者虽然是晚期，但也不一定会出现疼痛。此时需要专业的检查和临床治疗，明确诊断后可适当给予止痛药物缓解疼痛。
肝癌晚期脚肿怎么消肿	肝是肝脏功能受损的表现,可以引起低蛋白血症,门静脉高压,下腔静脉回流障碍等均可导致下肢水肿.建议检查肝功能,电解质,凝血系列等检查,积极对症治疗,才能改善缓解症状.
肝癌晚期浑身痒的厉害怎么办	肝癌晚期全身痒主要是因为血液中胆红素水平过高，导致的全身瘙痒。主要治疗首先应为对症治疗，但患者处于癌症晚期的话，治疗原则以改善患者症状为主，可以使用一定的镇疼药物，可至专科门诊进行评估
肝癌晚期会腹水吗？	肝腹水亦称为肝硬化腹水，主要是由于长期受到各种肝脏疾病的影响，导致肝质变硬，形成肝硬化。肝硬化致使肝功能减退，对蛋白质和维生素的不吸收而渗漏出的蛋白液，形成了肝腹水，对身体有着严重的影响。肝硬化是肝炎进展的终末阶段，是否已经发生癌变，需进一步完善相关检查明确
肝癌晚期患者嘴干怎么办	口渴嘴干不是肝癌的特征性表现，能导致口渴的疾病很多，例如：饮水量不够、机体高渗性脱水、干燥综合征等疾病，肝癌口渴的原因一般可能为饮食量不够、利尿药使用不当等。应通过寻找原发性病因，积极就诊，寻找到病因后及时治疗才是最正确的办法
肝癌晚期患者为什么大小便都拉不出来？	肝癌是消化道的恶性肿瘤，容易浸润性生长和转移的，导致上述情况病因是很多的，如肠梗阻，或是尿潴留等可能，还是及时的面诊，医生会根据具体的情况来处理
肝癌晚期患者拉肚子正常吗	导致腹泻的病因有很多，但总的来说是某些原因导致胃肠道甚至是出现直肠刺激征，可能导致直肠刺激征的疾病有细菌性痢疾、溃疡性结肠炎、肛周脓肿等疾病。肝癌里急后重一般考虑为：一.是患者精神紧张所导致，二.是本身的一些胃肠道疾病原发性疾病，三.是可能由于腹水的刺激。四.肝癌直结肠转移。腹胀的原因也有很多，腹水过多、肠梗阻、进食多等都可以导致腹胀。建议寻找原发病，治疗原发病，对症对因治疗则有助于患者疾病。
肝癌晚期患者抽的腹水都是血怎么办	肝癌血水的性质与来源主要是因为低蛋白血症导致胶体渗透压降低，血管内液体进入腹腔。但是当病情严重时，则血管中的红细胞也会跑出血管，进而进入腹腔。其主要是因为肝功能下降后白蛋白合成降低，血管通透性增加都有可能导致红细胞渗出外观外进入腹腔。
肝癌晚期肝硬化腹水，肝脾肿大腹水消退不得怎么办	肝癌晚期肝硬化腹水，腹水形成考虑两方面原因，一是腹膜转移恶性腹腔积液，而是低蛋白血症，所以建议积极治疗原发病的同时给予外源性补充人血白蛋白适当利尿缓解症状
肝癌晚期肝昏迷症状	除了肝性脑病昏迷昏睡等症状，但也可能有如下症状：1、肝脏区疼痛：主要表现为右上腹疼痛 2、消化道不适：主要表现为恶心、呕血、黑便等消化道不适的症状 3、发热：主要因为蛋白合成降低所导致机体感染而导致的发热 4、消瘦乏力：主要因为患者食欲降低，蛋白质合成降低 5、腹水、下肢水肿：白蛋白合成降低，血管内胶体渗透压降低，血管内液体渗出进组织液。6、黄疸：主要由于肝脏功能下降所导致的胆红素摄取下降。
肝癌晚期肝功能异常可逆吗	一般来说已经不可逆转，尽量对症处理，防止肝功能进一步恶化，改善患者的生存质量
肝癌晚期肝腹水治疗	肝癌患者出现腹水必须积极控制腹水的增长，尽量减轻患者的痛苦，并为肝癌的彻底根治创造机会。1、适当补充白蛋白，防止血浆渗透压进一步降低，导致血浆外渗而形成更多的腹水。2、补充营养，腹水反复排放腹水反而会导致营养的大量丢失。
肝癌晚期肝腹水有救吗?	肝癌患者出现腹水必须积极控制腹水的增长，尽量减轻患者的痛苦，并为肝癌的彻底根治创造机会。1、适当补充白蛋白，防止血浆渗透压进一步降低，导致血浆外渗而形成更多的腹水。2、补充营养，腹水反复排放腹水反而会导致营养的大量丢失。
肝癌晚期肝腹水还有治愈的可能	肝癌患者出现腹水必须积极控制腹水的增长，尽量减轻患者的痛苦，并为肝癌的彻底根治创造机会。1、适当补充白蛋白，防止血浆渗透压进一步降低，导致血浆外渗而形成更多的腹水。2、补充营养，腹水反复排放腹水反而会导致营养的大量丢失。
肝癌晚期腹泻严重怎么办	肝痛,纳差,乏力,消瘦,腹胀,腹块,发热,黄疸等为肝癌常见的症状,但这些大多已属中晚期症状,肝癌晚期拉肚子它可因肝癌合并肝功能障碍或合并门静脉栓所引起的.主要对症治疗处理腹泻，可至专科门诊进行处理。
肝癌晚期腹水自动消退怎么回事？	随着肿瘤的发展，会出现腹痛、黄疸等症状。消化系统症状、进行性消瘦等表现，腹水消退并不代表病情好转，需根据检查情况具体分析。
肝癌晚期腹水怎么治疗	肝癌患者出现腹水必须积极控制腹水的增长，尽量减轻患者的痛苦，并为肝癌的彻底根治创造机会。1、适当补充白蛋白，防止血浆渗透压进一步降低，导致血浆外渗而形成更多的腹水。2、补充营养，腹水反复排放腹水反而会导致营养的大量丢失。
肝癌晚期腹水怎么缓解？	肝癌患者出现腹水必须积极控制腹水的增长，尽量减轻患者的痛苦，并为肝癌的彻底根治创造机会。1、适当补充白蛋白，防止血浆渗透压进一步降低，导致血浆外渗而形成更多的腹水。2、补充营养，腹水反复排放腹水反而会导致营养的大量丢失。
肝癌晚期腹水严重怎么办	肝腹水亦称为肝硬化腹水，主要是由于长期受到各种肝脏疾病的影响，导致肝质变硬，形成肝硬化。肝硬化致使肝功能减退，对蛋白质和维生素的不吸收而渗漏出的蛋白液，形成了肝腹水，对身体有着严重的影响。因此可以进行腹水的定时抽取，降低腹压，减轻腹胀症状
肝癌晚期腹水肚子涨的很大怎么办？	肝腹水亦称为肝硬化腹水，主要是由于长期受到各种肝脏疾病的影响，导致肝质变硬，形成肝硬化。肝硬化致使肝功能减退，对蛋白质和维生素的不吸收而渗漏出的蛋白液，形成了肝腹水，对身体有着严重的影响。因此可以进行腹水的定时抽取，降低腹压，减轻腹胀症状
肝癌晚期腹水，吃了中药又拉肚子怎么办	中医治病一定要辨证论治,望闻问切,根据病情的变化和个人体质不同及时调整方剂,现成的方剂千篇一律药味单调,效果并不好,要找专业资深中医师按疗程服用
肝癌晚期发烧预示什么	可能是肿瘤本身引起的，也有可能是有局部坏死等原因引起的。如果体温高于38度5，可以用退热的药，另外可以温水擦浴，适当多喝点水，也有退热作用
肝癌晚期发烧是什么原因	肝癌病人主要表现为乏力、消瘦、食欲减退、腹胀等。部分病人可伴有恶心、呕吐、发热、腹泻等症状，病人抵抗力降低，或肝癌细胞进入血液作为致热源引起发热。
肝癌晚期发烧39度以下怎么退烧	如果体温高于38度5，可以用退热的药，另外可以温水擦浴，适当多喝点水，也有退热作用
肝癌晚期肚子涨怎么办？	出现腹胀的话则是需要考虑为腹水的情况，其次的话则是需要考虑为肠胀气的情况。如果是肠胀气的话则是需要采取灌肠及通便的药物治疗，其次做个腹部彩超检查是否为腹水，腹水的话则是需要采取利尿的药物治疗。
肝癌晚期肚子很胀吃不下饭怎么办？	肝癌晚期容易出现腹胀症状，主要是因为癌症患者的消化能力不好，治疗方式可以采用中医辅助西医的治疗方法，建议就诊于专科门诊进行治疗
肝癌晚期低血糖怎么怎么控制	肝癌引起的低血糖考虑是肝癌所改肝糖原输出量减少引起的反复的低血糖，治疗上以治疗原发病为主，同时要加强饮食
肝癌晚期出现咳血怎么办	咳血是有多种原因例如鼻咽部病变，可至相关专科如耳鼻喉科进行检查，但肝癌晚期咳血是一种凝血功能障碍导致的出血现象，肝癌出血现象体现在肝功能减退，使凝血因子合成减少所致，容易引起患者牙龈出血、痔疮出血、胃肠道出血、鼻出血等，
肝癌晚期吃了东西总是吐该怎么办？	肝癌晚期吃了东西总是吐，患者还是要选择营养价值较高，又易于消化的食物吃，呕吐的问题，我建议患者可以选择吃止吐药，看看呕吐的问题是不是能够有所减轻，只有每天好好吃饭，且吃有营养的东西，对晚期癌症患者来说才会有好处
肝癌晚期不睡觉说胡话？	大部分的癌症晚期患者不睡觉说胡话是因为电解质紊乱，大脑神经异常，癌症细胞扩散，影响患者正常的生理机能导致的。可就诊于专科门诊进行相应诊疗
肝癌晚期不能进食怎么办？	肝癌到了晚期，如果连饭都不能吃，可能生存时间不长。这种情况下，如果配合静脉营养支持，还能够延长生存期，提高患者生存质量
肝癌晚期病人如何减轻腹胀的痛苦	癌性疼痛包括病因治疗和对症治疗，病因治疗就是积极治疗病灶，考虑放化疗或者介入，对症治疗就是服用止疼药物，要到正规医院就诊，确定用药。
肝癌晚期病人，肝疼的很厉害。怎样止疼？	癌症的疼痛治疗一般分为三级，轻度疼痛给予非阿片类镇痛药，如阿司匹林。中度疼痛时加用弱阿片类镇痛药，代表要主要是可待因。重度疼痛时选用强阿片类药物，例如吗啡等。除药物镇痛外，我们还应给予患者临终关怀以及对症等治疗。与此同时我们应该积极寻找产生疼痛的原因，从根本上解决治疗疼痛。
肝癌晚期，左边肩膀很疼怎么办	疼痛的因素有很多，左肩痛可能是由于外伤，关节炎等原因导致，但肝癌如发生骨等处转移，可产生相应位置症状，在积极治疗原发病（包括放疗化疗等），对于疼痛，主要是对症的治疗。建议骨科、疼痛科就诊，明确诊断，对症治疗
肝癌晚期，腰疼，总睡觉，怎么缓解疼痛	导致身体疼痛的疾病有很多，首先要考虑是否为其他原发疾病，例如：胃肠道的急症，肾结石，胆结石，原发性肌肉劳损，运动性肌肉损伤等都可以导致身体疼痛不适。肝癌所导致的身体疼痛一般考虑肿瘤生长牵扯肝包膜所产生的牵涉痛或内脏痛。具体的疼痛时间是不确定的，有的可以很早期就开始，也有患者虽然是晚期，但也不一定会出现疼痛。此时需要专业的检查和临床治疗，明确诊断后可适当给予止痛药物缓解疼痛。
肝癌晚期，全身发黄，双脚浮肿，全身发痒怎么办？	肝痛,纳差,乏力,消瘦,腹胀,腹块,发热,黄疸等为肝癌常见的症状,但这些大多已属中晚期症状.主要对症处理输注白蛋白、降低血液中胆红素水平，提高患者生活质量
肝癌晚期，多处转移，腿疼的厉害怎么办	导致身体疼痛的疾病有很多，首先要考虑是否为其他原发疾病，例如：胃肠道的急症，肾结石，胆结石，原发性肌肉劳损，运动性肌肉损伤、肝癌骨转移等都可以导致身体疼痛不适。肝癌所导致的身体疼痛一般考虑肿瘤生长牵扯肝包膜所产生的牵涉痛或内脏痛。具体的疼痛时间是不确定的，有的可以很早期就开始，也有患者虽然是晚期，但也不一定会出现疼痛。此时需要专业的检查和临床治疗，明确诊断后可适当给予止痛药物缓解疼痛。
肝癌疼痛怎么办	癌症的疼痛治疗一般分为三级，轻度疼痛给予非阿片类镇痛药，如阿司匹林。中度疼痛时加用弱阿片类镇痛药，代表要主要是可待因。重度疼痛时选用强阿片类药物，例如吗啡等。除药物镇痛外，我们还应给予患者临终关怀以及对症等治疗。与此同时我们应该积极寻找产生疼痛的原因，从根本上解决治疗疼痛。
肝癌疼痛晚期打什么针？	在治疗过程中，为了减轻肝癌患者的疼痛，传统的措施是采用三阶梯镇痛法，使用镇痛药物止痛，在短时间内缓解患者的疼痛，针对患者的个体差异，施以相应的心理疏导、转移注意力、制订锻炼方案、规范起居饮食习惯等护理措施。
肝癌水肿怎么消除?	肝是肝脏功能受损的表现,可以引起低蛋白血症,门静脉高压,下腔静脉回流障碍等均可导致下肢水肿.建议检查肝功能,电解质,凝血系列等检查,积极对症治疗,才能改善缓解症状.
肝癌术后胃胀气怎么办？	在这种情况下，建议患者可以去医院咨询这种情况，主要是在胃炎的情况下。肝癌本身的肝功能确实不好，腹胀难消化是正常的。其次，它可能导致腹水。等也会引起腹胀。
肝癌术后腹水怎么办	肝癌患者出现腹水必须积极控制腹水的增长，尽量减轻患者的痛苦，并为肝癌的彻底根治创造机会。1、适当补充白蛋白，防止血浆渗透压进一步降低，导致血浆外渗而形成更多的腹水。2、补充营养，腹水反复排放腹水反而会导致营养的大量丢失。
肝癌术后复发怎么办	如果患者术后恢复良好，积极点可以开腹再次手术切除肝内复发灶；保守一些可以在超声引导下行肝癌射频消融术；或者使用放化疗或介入治疗靶向药物治疗等
肝癌术后,腹胀是怎么回事	在这种情况下，建议患者可以去医院咨询这种情况，主要是在胃炎的情况下。肝癌本身的肝功能确实不好，腹胀难消化是正常的。其次，它可能导致腹水。等也会引起腹胀。建议是有症状的。
肝癌手术十天了还每天下午都会高烧38度什么原因	病人肝癌术后诊断明确。目前发热病因：术后吸收热、感染可能性大。建议加强营养对症治疗促进身体恢复，及时抗感染、退热缓解症状
肝癌手术切除后的复发率高吗?	肝癌在手术之后会有复发的可能，但并不一定都复发的，早期的情况下，复发的几率相对较低，术后定期复查。
肝癌手术两个月,肝疼怎么回事？	肝脏上出现肿瘤以后，就会影响到肝脏的正常功能，并且癌肿瘤或癌细胞会压迫到或刺激到正常的肝癌细胞，使其不能像以前一样正常生长，就会让患者感到肝脏不适，产疼痛等症状，由于疼痛会因肿瘤生长的部位不同而有所变化。
肝癌手术后胃痛是为什么?	肝脏上出现肿瘤以后，就会影响到肝脏的正常功能，并且癌肿瘤或癌细胞会压迫到或刺激到正常的肝癌细胞，使其不能像以前一样正常生长，就会让患者感到肝脏不适，产疼痛等症状，由于疼痛会因肿瘤生长的部位不同而有所变化。术后胃痛考虑是否是应激性胃溃疡或其他并发症，建议至专科门诊进行检查，明确诊断。
肝癌手术后十多天腹腔积液右侧胸腔积液对身体有影响吗	多为肝癌术后产生的病发症，造成的积液，可以对症利尿，补充营养，或者穿刺引流进行处理
肝癌手术后积液严重吗	多为是肝癌术后产生的病发症，造成的腹腔积液，可以对症利尿，补充营养，或者穿刺引流进行处理
肝癌手术后肝腹水怎么办？	肝癌患者出现腹水必须积极控制腹水的增长，尽量减轻患者的痛苦，并为肝癌的彻底根治创造机会。1、适当补充白蛋白，防止血浆渗透压进一步降低，导致血浆外渗而形成更多的腹水。2、补充营养，腹水反复排放腹水反而会导致营养的大量丢失。
肝癌手术后腹胀怎么办？	在这种情况下，建议患者可以去医院咨询这种情况，主要是在胃炎的情况下。肝癌本身的肝功能确实不好，腹胀难消化是正常的。其次，它可能导致腹水。等也会引起腹胀。建议是有症状的。
肝癌手术后腹水怎么办？	肝癌患者出现腹水必须积极控制腹水的增长，尽量减轻患者的痛苦，并为肝癌的彻底根治创造机会。1、适当补充白蛋白，防止血浆渗透压进一步降低，导致血浆外渗而形成更多的腹水。2、补充营养，腹水反复排放腹水反而会导致营养的大量丢失。
肝癌手术后腹内有积水？	肝癌晚期的患者，常常有严重的黄疸、消化不良、腹水、剧烈的肝区疼痛等症状和体征。如果患者出现腹水，首先要做的就是消除腹水。可先予中药或西药利尿剂治疗
肝癌手术后发烧怎么才能退烧？	肝癌手术后发烧主要是因为手术后吸收热引起，如果体温高于38度5，可以用退热的药，另外可以温水擦浴，进行物理降热
肝癌手术后低烧怎么办？	癌症晚期就会有发烧的症状，这属于正常的反应，这样的话，发烧的时候可给予退烧药。这个时候只能针对患者的症状治疗。尽量避免患者疼痛
肝癌手术后大量腹水怎么回事？	肝癌腹水是肝癌最常见的并发症之一，肝癌患者出现腹水主要是由于慢性肝功能受损，使白蛋白合成减少，血浆胶体渗透压下降或门静高压致细胞内外水液代谢失衡，细胞内的水液向细胞外流失而成腹水。
肝癌手术后病人病人发烧是怎么回事？	肝癌手术后发烧主要是因为手术后吸收热引起，如果体温高于38度6，可以用退热的药，另外可以温水擦浴，进行物理降热
肝癌手术后，腹腔少量积液，怎么回事？	多为是肝癌术后产生的病发症，造成的腹腔积液，可以对症利尿，补充营养，或者穿刺引流进行处理
肝癌手术的并发症有哪些？	出血、肝硬化、腹水、肝功能受损、胆漏等，但是手术并发症的产生都是有一定的概率的，根据患者的身体状况及病情发展，手术大小又有所不同。
肝癌切除术后背一直有点痛是怎么回事	肝脏上出现肿瘤以后，就会影响到肝脏的正常功能，并且癌肿瘤或癌细胞会压迫到或刺激到正常的肝癌细胞，使其不能像以前一样正常生长，就会让患者感到肝脏不适，产疼痛等症状，由于疼痛会因肿瘤生长的部位不同而有所变化。术后后背疼痛有可能是肿瘤进展引起的，需行专门进行检查，明确诊断。
肝癌切除后转移怎么办？	如果患者术后恢复良好，积极点可以开腹再次手术切除肝内复发灶；2、保守一些可以在超声引导下行肝癌射频消融术；
肝癌破裂大出血术后需怎么治疗	首先进行输血，然后要考虑手术治疗，只有手术治疗才能得到根治。同时需要配合其他治疗，防止肿瘤的复发，延长寿命。
肝癌呕吐怎么办?	肝癌患者已经到晚期的时候，出现呕吐不止的情况也是属于正常的现象，这种情况下最好在医生的指导下给患者吃一些药物来控制呕吐的情况，而且在平时也要注意患者的饮食情况，给患者吃一些清淡的食物
肝癌尿血是怎么回事?	一般情况下肝癌导致的是尿液颜色变黄而非变红。如果出现肉眼可见的红色尿，一般考虑不是肝源性的疾病。血尿、息肉样血尿一般见于肾源性疾病。确诊需要做跟肾病相关的一些检查：红细胞相差显微镜、管型尿、肾穿刺活检等。
肝癌开刀后胸腔有积水？	肝癌术后胸腔积水的话，一方面考虑是否肝癌胸腔转移，可复查CT查看；另一方面考虑是否低蛋白血症导致，可进行血化验，根据情况适当补充白蛋白；必要时可进行抽胸水治疗。
肝癌介入术后常见并发症及注意事项	穿刺点出血、腹腔出血、恶心呕吐、上腹疼痛、腹水、感染。
肝癌介入后腹胀怎么办？	在这种情况下，建议患者可以去医院咨询这种情况，主要是在胃炎的情况下。肝癌本身的肝功能确实不好，腹胀难消化是正常的。其次，它可能导致腹水。等也会引起腹胀。建议是有症状的。
肝癌脚肿怎么消肿妙招?	肝是肝脏功能受损的表现,可以引起低蛋白血症,门静脉高压,下腔静脉回流障碍等均可导致下肢水肿.建议检查肝功能,电解质,凝血系列等检查,积极对症治疗,才能改善缓解症状.
肝癌会造成乙肝的感染吗？	首先要明确的是乙肝确实可以导致的肝癌，这是一个动态的过程，不能简单的看待这个过程。肝炎、肝硬化、肝癌俗称的肝癌三部曲，但是肝癌不一定会导致乙肝。乙肝一般由血液、母婴传播。
肝癌患者腰疼怎么回事	半数以上病人肝区疼痛为首发症状，多为持续性钝痛、刺痛或胀痛。主要是由于肿瘤迅速生长，使肝包膜张力增加所致。位于肝右叶顶部的癌肿累及横膈，则疼痛可牵涉至右肩背部。当肝癌结节发生坏死、破裂，可引起腹腔内出血，出现腹膜刺激征等急腹症表现。
肝癌患者疼痛时怎么办	癌症的疼痛治疗一般分为三级，轻度疼痛给予非阿片类镇痛药，如阿司匹林。中度疼痛时加用弱阿片类镇痛药，代表要主要是可待因。重度疼痛时选用强阿片类药物，例如吗啡等。除药物镇痛外，我们还应给予患者临终关怀以及对症等治疗。与此同时我们应该积极寻找产生疼痛的原因，从根本上解决治疗疼痛。
肝癌患者怕冷怎么治疗？	导致发冷发抖的原因有很多，可能的情况是由机体处于寒冷的环境，此时机体为产热而出现的发抖，或者是机体出现严重的感染从而出现的寒战高热，亦或是机体体质下降从而导致的发抖情况。应该积极寻找原发病，对因对症治疗。
肝癌患者凝血功能障碍该怎么治？	建议检查凝血功能，应用生物免疫治疗或输注血小板，并到专科门诊景行评估处理
肝癌患者口苦怎么办	肝癌晚期，随着病情发展，病人会出现各种临床不适感，例如口酸、烧心等，痛苦不堪。建议及时根据患者疾病进展，进行肝癌外科或介入治疗，控制病情发展，缓解临床不适。
肝癌患者发烧怎么退烧？	可能是肿瘤本身引起的，也有可能是有局部坏死等原因引起的。如果体温高于38度5，可以用退热的药，另外可以温水擦浴，适当多喝点水，也有退热作用
肝癌患者肚子疼怎么办	在治疗过程中，为了减轻肝癌患者的疼痛，传统的措施是采用三阶梯镇痛法，使用镇痛药物止痛，在短时间内缓解患者的疼痛，针对患者的个体差异，施以相应的心理疏导、转移注意力、制订锻炼方案、规范起居饮食习惯等护理措施。
肝癌后期老是发热怎么办	癌症晚期就会有发烧的症状，这属于正常的反应，这样的话，发烧的时候可给予退烧药。这个时候只能针对患者的症状治疗。尽量避免患者疼痛
肝癌肝痛怎么办	癌症的疼痛治疗一般分为三级，轻度疼痛给予非阿片类镇痛药，如阿司匹林。中度疼痛时加用弱阿片类镇痛药，代表要主要是可待因。重度疼痛时选用强阿片类药物，例如吗啡等。除药物镇痛外，我们还应给予患者临终关怀以及对症等治疗。与此同时我们应该积极寻找产生疼痛的原因，从根本上解决治疗疼痛。
肝癌肝腹水治疗方法	肝癌患者出现腹水必须积极控制腹水的增长，尽量减轻患者的痛苦，并为肝癌的彻底根治创造机会。1、适当补充白蛋白，防止血浆渗透压进一步降低，导致血浆外渗而形成更多的腹水。2、补充营养，腹水反复排放腹水反而会导致营养的大量丢失。
肝癌肝腹水怎么治好？	肝癌患者出现腹水必须积极控制腹水的增长，尽量减轻患者的痛苦，并为肝癌的彻底根治创造机会。1、适当补充白蛋白，防止血浆渗透压进一步降低，导致血浆外渗而形成更多的腹水。2、补充营养，腹水反复排放腹水反而会导致营养的大量丢失。
肝癌肝腹水怎么办	肝癌患者出现腹水必须积极控制腹水的增长，尽量减轻患者的痛苦，并为肝癌的彻底根治创造机会。1、适当补充白蛋白，防止血浆渗透压进一步降低，导致血浆外渗而形成更多的腹水。2、补充营养，腹水反复排放腹水反而会导致营养的大量丢失。
肝癌肝腹水可以治好吗?	肝腹水亦称为肝硬化腹水，主要是由于长期受到各种肝脏疾病的影响，导致肝质变硬，形成肝硬化。肝硬化致使肝功能减退，对蛋白质和维生素的不吸收而渗漏出的蛋白液，形成了肝腹水，对身体有着严重的影响。因此可以进行腹水的定时抽取，降低腹压，减轻腹胀症状
肝癌腹胀是怎么回事	肝癌腹胀是由于发生了肝腹水，由于长期受到各种肝脏疾病的影响，导致肝质变硬，形成肝硬化。肝硬化致使肝功能减退，对蛋白质和维生素的不吸收而渗漏出的蛋白液，形成了肝腹水导致腹胀，还可能由于食欲下降导致消化不良，食物聚积在消化道引起
肝癌腹水怎么治	肝腹水亦称为肝硬化腹水，主要是由于长期受到各种肝脏疾病的影响，导致肝质变硬，形成肝硬化。肝硬化致使肝功能减退，对蛋白质和维生素的不吸收而渗漏出的蛋白液，形成了肝腹水，对身体有着严重的影响。因此可以进行腹水的定时抽取，降低腹压，减轻腹胀症状
肝癌腹水怎么办?	肝癌患者出现腹水必须积极控制腹水的增长，尽量减轻患者的痛苦，并为肝癌的彻底根治创造机会。1、适当补充白蛋白，防止血浆渗透压进一步降低，导致血浆外渗而形成更多的腹水。2、补充营养，腹水反复排放腹水反而会导致营养的大量丢失。
肝癌腹水是怎么回事	肝癌腹水是晚期肝癌最常见的并发症之一，肝癌患者出现腹水主要是由于慢性肝功能受损，使白蛋白合成减少，血浆胶体渗透压下降或门静高压致细胞内外水液代谢失衡，细胞内的水液向细胞外流失而成腹水。
肝癌腹水不能吃靶向药吗	肝腹水亦称为肝硬化腹水，主要是由于长期受到各种肝脏疾病的影响，导致肝质变硬，形成肝硬化。肝硬化致使肝功能减退，对蛋白质和维生素的不吸收而渗漏出的蛋白液，形成了肝腹水，对身体有着严重的影响。能否吃靶向药需要根据患者的具体身体状况，去相应的肿瘤科门诊进行评估
肝癌发烧怎么处理?	可能是肿瘤本身引起的，也有可能是有局部坏死等原因引起的。如果体温高于38度5，可以用退热的药，另外可以温水擦浴，适当多喝点水，也有退热作用
肝癌恶心呕吐吃什么药？	疾病晚期，会有很多并发症，呕吐和心痛比较常见，有很多并发症，也可能与长期化疗和放疗有一定的关系，此时，需要到专科门诊进行评估，对症处理，改善患者状况，增强患者的生活质量。
肝癌肚子胀气怎么缓解	肝癌病人常伴有消化功能减退的表现，出现腹胀比较常见，一方面要在体力承受范围内适当活动，另一方面要针对病情给予必要的治疗。
肝癌的肝昏迷怎么办？	肝性昏迷是肝脏功能到最后阶段的临床表现，已经不怎么乐观了。如果说要处理的话，家属唯一能做的就是把患者尽快送到医院去，进行及时救治
肝癌导致胃底静脉曲张，出血，治疗后该吃什么才能不出血	胃底静脉曲张出血治疗后，建议清淡饮食，吃一些好消化的流食或者半流食，这样可减少处理伤口处的刺激，有利于恢复。
肝癌导致胃出血怎么治疗	胃出血是一种消化道出血现象，病因多种，如急性胃黏膜病变，消化道溃疡等疾病，因此需进行相关检查，明确诊断，但肝功能减退，使凝血因子合成减少，容易引起患者牙龈出血、痔疮出血、胃肠道出血、鼻出血等，若消化道大量出血应在内镜引导下进行止血，并服用相应止血药物治疗
肝癌出现黄疸应该怎么治疗？	肝癌总胆红素高要服用降低胆红素的药物，还要听从医生的嘱咐去做好饮食的调理，平时生活上就要多注意休息及饮食
肝癌持续低烧，怎么办？	癌症晚期就会有发烧的症状，这属于正常的反应，这样的话，发烧的时候可给予退烧药。这个时候只能针对患者的症状治疗。尽量避免患者疼痛
肝癌吃不下饭怎么办	吃不下饭时，我们不能简单的认为这是由于肝癌造成的。导致患者无食欲的原因有很多，从口腔到胃肠道都有可能导致患者无法进食或者食欲差等症状。肝癌属于一种消耗性疾病，患者肝脏功能差，蛋白合成降低，由于肝硬化导致胃肠道淤血等都有可能导致这些情况。如果患者胃肠道功能尚可，则建议场内营养，否则，行静脉输注等场外营养。
肝癌，胃有点不舒服，这是什么情况呢？	肝脏上出现肿瘤以后，就会影响到肝脏的正常功能，并且癌肿瘤或癌细胞会压迫到或刺激到正常的肝癌细胞，使其不能像以前一样正常生长，就会让患者感到肝脏不适，产疼痛等症状，由于疼痛会因肿瘤生长的部位不同而有所变化，当癌细胞导致静脉高压及肠胃功能混乱或胃底静脉曲张后，就容易出现腹胀，大便不规律，消化不良，食欲不振，消化道出血等消化道症状
肝癌生存时间	答案
肝癌晚期用什么药可以控制肿瘤，延续生命？	一线治疗：对于不可切除的晚期肝细胞癌患者，若不适合局部区域治疗且肝功能足以耐受全身性治疗(即Child-Turcotte-Pugh A或B级肝硬化），对于不符合临床试验资格标准或试验治疗不可行的患者，我们推荐采用分子靶向治疗，而非常规的细胞毒化疗，可选择索拉非尼和乐伐替尼。二线治疗 —：对于一线治疗时肿瘤仍进展，且日常体能状态和肝功能足以耐受二线治疗的患者，可选择二线治疗：若患者不符合临床试验的资格或没有相关临床试验，可选择索拉非尼(之前一线治疗未使用该药)、瑞格非尼、尼沃单抗、培布珠单抗或乐伐替尼(之前一线治疗未使用该药)。患者接受全身性治疗时，通常在治疗6-8周后采用横断面成像复查影像学，之后每2-3个月复查1次。
肝癌晚期吃中药最长能维持多久	肝癌的治疗首选是手术治疗，对于无法手术的患者可以考虑介入或者放化疗，中医主要用于辅助治疗肝癌，提高机体免疫力，改善全身症状。建议咨询专科门诊。
肝癌晚期全身黄疸能活多久？	肝癌患者脸色变黄说明出现黄疸，肝癌患者肝细胞发生了广泛性损害（变性、坏死），致使肝细胞对非结合胆红素的摄取、结合发生障碍 血液中结合胆红素浓度也增高而出现黄疸，血液中结合胆红素过高导致皮肤、巩膜表现为发黄，甚至出现瘙痒，此时应及时就诊，查找导致黄疸的具体的病因，进行相应的诊治处理。
肝癌晚期能活过5年吗	肝癌生存期与许多因素有关，如肿瘤分型，有无远处转移，患者基本状况，临床治疗疗效等多个方面，一般来说，早期发现，早期治疗，制定个体化治疗方案，定期随诊往往可以延长生存。
肝癌晚期最快多久会死？	肝癌生存期与许多因素有关，如肿瘤分型，有无远处转移，患者基本状况，临床治疗疗效等多个方面，一般来说，早期发现，早期治疗，制定个体化治疗方案，定期随诊往往可以延长生存。
肝癌晚期多处骨转移能活多久？	肝癌已经远处转移，此时进行手术治疗是不可取的，但是我们可以进行全身性的治疗、放疗和TACE等治疗，能够适当延长其生存时间，但是具体生存时间是没办法确定的，这与不同患者的身体机能、选择的治疗方法、护理等因素有关。
肝癌会突然就死掉了吗？	是存在的，肝癌死亡原因有以下几个方面：1.合并感染：处于晚期肝癌的疾病人群，这时期身体机能已经十分衰弱，因为身体的免疫力下降，导致肝癌后期有感染性的并发症疾病出现，特别是容易引发细菌病毒的侵袭，和真菌等病毒的感染，就会加重病情，这时候往往会出现高烧和昏迷等症状，最后就会导致死亡现象发生。2.出血：在肝癌晚期，由于骨髓造血功能发生的异常，血小板就会减少，还因为癌细胞直接破坏到血管，这样很容易导致血管破裂，就会出现大出血，最后就会年轻病人死亡。3.重要脏器损害：身体的肝肾气装受到了严重的损害，那么就会直接破坏桩器的正常结构，就会导致死亡，最重要的脏器是大脑，会影响呼吸和循环中枢，而且还会出现脑出血等现象，也是导致病人死亡的原因。
肝癌晚期已经在疼痛了能够活多久？	肝癌晚期疼痛是因为肿瘤骨转移或侵犯腹膜后神经，由于可能并发肝性脑病以及吗啡的呼吸抑制作用，此时应对症处理，尽量延长患者的生存时间，改善患者的生存质量。
肝胆肿瘤能活多少年？	肝胆肿瘤分为良性与恶性，良性肿瘤可以定期复查或手术治疗，其生存在适当的治疗后患者的生存不受影响。然而虽然肝恶性肿瘤可以通过多种方式治疗，但其预后取决于患者肿瘤分期，基本情况及综合治疗效果，对于恶性程度低，基本情况较好，以及综合治疗取得很好效果患者，通常预后较好，生存时间较长，建议尽早到医院进行多学科联合诊治，制定个体化治疗方案，从而获得较好的治疗效果，通常来说，早期治疗效果相对较好，生存期往往较长
肝癌已经扩散了还能活多久	肝癌扩散这就涉及到了扩散的范围问题。如果仅限于肝内转移，并且转移灶仅限于一侧肝脏内，在无其他手术禁忌症的情况下，可行手术治疗。但如果是肝内广泛转移甚至是肝外转移，例如：肺、脑、骨等器官，则无法行外科手术治疗，可选择其他保守治疗等方式。但是其他多药物联合治疗效果不好，建议多学科会诊。
肝癌，以前只能活几个月，现在可以延长达十年，是怎样实现的	随着对疾病的认识的深入，及对药物的研发，手术术式的改进，新的治疗方法的出现和改进，多学科模式的发展，现在对肝癌的治疗有了长足的进展，将肝癌的生存率尤其是早期肝癌的生存率有了极大的提升。
肝癌开始扩散能活多久	肝癌扩散这就涉及到了扩散的范围问题。如果仅限于肝内转移，并且转移灶仅限于一侧肝脏内，在无其他手术禁忌症的情况下，可行手术治疗。但如果是肝内广泛转移甚至是肝外转移，例如：肺、脑、骨等器官，则无法行外科手术治疗，可选择其他保守治疗等方式。但是其他多药物联合治疗效果不好，建议多学科会诊。
肝癌脚肿还能活多久	一般肝癌病人出现这类情况时已经到了晚期，身形明显消瘦，精力较差，下肢水肿的出现更是让病人的身体雪上加霜。要积极治疗，可给予利尿药物消除水肿，如白蛋白较低还应适当补充人血白蛋白，尽可能满足病人的基本心理需求，采取有效办法为患者减轻痛苦。
患上了肝癌一定会死吗？	确诊为肝癌的话，首选治疗是手术切除，但大部分患者由于肿瘤范围或基础肝功能障碍而不符合手术条件。对于手术不可切除的患者，肝脏移植是唯一可能治愈的其他选择。对于不符合切除术或肝脏移植条件的患者，治疗选择包括局部非手术肿瘤消融方法和全身治疗，前者包括射频消融术(RFA)、经皮无水乙醇注射疗法(PEI)、经动脉化疗栓塞(TACE)和放射治疗(RT)。治疗的选择取决于患者基础肝病的严重程度、肝内肿瘤的大小和分布、血供情况以及患者总体体能状态。目前对于Child-Pugh A级肝硬化、肿瘤直径小于5cm的患者，进行局部肝切除术可使患者的长期总体生存率大于等于40%，据报导，符合如下条件的经过仔细选择的患者结局最好：病灶为单发性、无肝内转移和血管侵犯(肉眼或显微镜下可见侵犯门静脉或肝静脉分支)、肿瘤直径小于等于5cm、阴性手术切缘大于1cm；此类患者的5年生存率高达78%。所以抱以积极的心态治疗，对远…
肝癌症晚期能治好吗	肝癌首选手术治疗，对于不能手术患者可以行介入、免疫靶向治疗，建议到医院进行多学科联合会诊，制定个体化治疗方案，往往可以获得延长患者生存，肝癌晚期一般是无法治愈，我们需要做的是尽量延长患者的生存时间，改善患者的生存质量。具体的化疗药物在有条件情况下，可以进行基因检测进行判断。
肝母细胞瘤能治好吗	肝母细胞瘤是一种具有多种分化方式的恶性胚胎性肿瘤。它由相似于胎儿性上皮性肝细胞、胚胎性细胞以及分化的间叶成分（包括骨样基质、纤维结缔组织和横纹肌纤维）组成。手术切除是肝母细胞瘤最为有效的治疗方法，常辅以化疗、放疗或免疫治疗。手术完整切除肿瘤是影响患儿后期存活的重要因素，但因起病隐匿，60%以上的患儿在确诊时已经无法完整切除瘤体，而研究表明90%的肝母细胞瘤对化疗有效，故在治疗上不建议早期手术治疗，而是术前进行新辅助化疗，以缩小肿瘤，并能在一定程度抑制隐匿性转移灶。放疗对肝母细胞瘤有一定疗效，偶尔大剂量的局部放疗可使肿瘤缩小，术后肝断面的残余瘤也可照射，最常用于肺转移病灶楔形切术术后对化疗不敏感。肿瘤大小（有无侵犯血管等）、肿瘤切除情况、病理类型、AFP水平及有无远处转移等是影响肝母细胞瘤预后的可能原因。肝母细胞瘤若能切除（如肿瘤单发的、瘤体较小、位置表浅且无肝外转移）则预后较好，约1/3…
肝癌晚期每天都吃止痛药了还能拖多久?	肝癌晚期疼痛是因为肿瘤骨转移或侵犯腹膜后神经，由于可能并发肝性脑病以及吗啡的呼吸抑制作用，此时应对症处理，尽量延长患者的生存时间，改善患者的生存质量。
肝癌患者腹水程血红色，请问还能坚持多久	肝癌血水的性质与来源主要是因为低蛋白血症导致胶体渗透压降低，血管内液体进入腹腔。但是当病情严重时，则血管中的红细胞也会渗出血管，进而进入腹腔。其主要是因为肝功能下降后白蛋白合成降低，血管通透性增加都有可能导致红细胞渗出外观外进入腹腔。此时可对腹水进行生化检验及瘤细胞检测，对患者预后进行评估。
小肝癌做了射频能活二十年吗?	通常情况下，介入治疗效果好，术后无复发，定期随诊，联合其他方式共同治疗的患者往往可以延长生存。但是肝癌介入术只能够消灭肉眼可见的肿瘤，可能会有肿瘤细胞残留，或者肿瘤恶性程度高，发生无法观察到的转移，因此肝癌术后存在复发可能，并不能保证生存时间一定有多长。
5厘米肝癌切除能活多久？	进行肝癌切除术的患者存在疾病复发和出现第二原发性肝癌的风险，并不能说某个人一定会复发或者说一定不复发。对于多数在切除术后复发的患者，其复发灶局限于肝脏。治疗后监测的主要目的是早期识别可能适合后续局部治疗的疾病。几种有效的治疗方式可控制疾病，包括再次肝切除、经动脉栓塞术或化疗栓塞术、射频消融术及肝移植。在此我们建议：术后第一个月最初2-3年每4个月进行1次CT或MRI成像检查，之后每6个月1次；测量血清甲胎蛋白(AFP)，如果初始水平升高，最初2-3年每4个月检测1次，之后每6个月1次。但是不同地方具体复查随诊时间与内容可能会有所差异，具体复查根据就诊医生建议进行。
7cm大肝癌切除能活多久？	进行肝癌切除术的患者存在疾病复发和出现第二原发性肝癌的风险，并不能说某个人一定会复发或者说一定不复发。对于多数在切除术后复发的患者，其复发灶局限于肝脏。治疗后监测的主要目的是早期识别可能适合后续局部治疗的疾病。几种有效的治疗方式可控制疾病，包括再次肝切除、经动脉栓塞术或化疗栓塞术、射频消融术及肝移植。在此我们建议：术后第一个月最初2-3年每4个月进行1次CT或MRI成像检查，之后每6个月1次；测量血清甲胎蛋白(AFP)，如果初始水平升高，最初2-3年每4个月检测1次，之后每6个月1次。但是不同地方具体复查随诊时间与内容可能会有所差异，具体复查根据就诊医生建议进行。
肝癌早期一般能活多长时间	对于所有肝癌患者来说，早期诊断都是非常重要的，因为肝癌早期的治愈率是很高的。如果用五年生存率来代表治愈率，那么早期肝癌的五年生存率可以达到80%，一旦到了中期或者晚期肝癌，这项数据就会急剧降低，变成20~30%左右。所以说早期诊断是非常重要的。
肝癌晚期消化道出血多久会死？	消化道出血是肝癌的常见并发症之一，是和肝癌引起的胃底静脉曲张破裂出血是有很大的关系的，同时由于凝血因子的缺乏也是可以导致出血，预后和出血量的大小是有很大的关系，如果大出血的话，是可以引起危及生命的，所以还是及时的就诊，及时的止血，护胃，抑酸，补液等规范治疗。
肝癌晚期消化道出血多久会死？	消化道出血是肝癌的常见并发症之一，是和肝癌引起的胃底静脉曲张破裂出血是有很大的关系的，同时由于凝血因子的缺乏也是可以导致出血，预后和出血量的大小是有很大的关系，如果大出血的话，是可以引起危及生命的，所以还是及时的就诊，及时的止血，护胃，抑酸，补液等规范治疗。
肝癌晚期肝硬化最多能活多久	肝癌晚期肝硬化患者，其肝脏功能严重受损，并发症出现，此时应尽早评估，对患者进行恰当的治疗，尽可能保证其生存质量，延长生存。
胆管癌晚期能活多久	胆管癌是一种恶性度较高的肿瘤，其发病部位不同，所采用的治疗方式不同，整体生存率存在较大差异，如远端胆管癌，需放置支架；肝门部胆管癌需外引流或放置支架来缓解黄疸；肝内胆管癌易发生远处转移，需化疗或免疫治疗。患者接受治疗的反应不同，生存时间也存在差异，比如对化疗较敏感或者对免疫治疗较敏感，则生存时间较长。
肝癌晚期能活一年吗？	肝癌生存期与许多因素有关，如肿瘤分型，有无远处转移，患者基本状况，临床治疗疗效等多个方面，一般来说，早期发现，早期治疗，制定个体化治疗方案，定期随诊往往可以延长生存。肝癌晚期生存期无法给出确切答案,有的患者能够活几个月,也有的患者能够活几年，但是总的来说，晚期肝癌的五年生存率明显低于早期肝癌的五年生存率。
肝癌晚期还有救吗？	肝癌的预后取决于患者肿瘤分期，基本情况及综合治疗效果，对于恶性程度低，基本情况较好，以及综合治疗取得很好效果患者，通常预后较好，生存时间较长，建议尽早到医院进行多学科联合诊治，制定个体化治疗方案，从而获得较好的治疗效果
肝癌晚期排尿不出还能活多久	尿不出来的原因有泌尿系、前列腺因素和心理因素造成，其中不排除肝癌转移至泌尿系的可能，此时应做进一步检查，找到尿不出来的原因，并尽快治疗。若是发生转移，我们需要做的是尽量延长患者的生存时间，改善患者的生存质量。具体的化疗药物可进行基因检测进行判断。
肝癌晚期能活几年？	肝癌生存期与许多因素有关，如肿瘤分型，有无远处转移，患者基本状况，临床治疗疗效等多个方面，一般来说，早期发现，早期治疗，制定个体化治疗方案，定期随诊往往可以延长生存
肝癌晚期还有救吗	肝癌生存期与许多因素有关，如肿瘤分型，有无远处转移，患者基本状况，临床治疗疗效等多个方面。肝癌晚期患者一般有远处转移，基本状况差，故其生存时间有限，我们需要做的是尽量延长患者的生存时间，改善患者的生存质量。
原发性肝癌能活多久	肝癌的预后取决于患者肿瘤分期，基本情况及综合治疗效果，对于恶性程度低，基本情况较好，以及综合治疗取得很好效果患者，通常预后较好，生存时间较长，建议尽早到医院进行多学科联合诊治，制定个体化治疗方案，从而获得较好的治疗效果，通常来说，早期肝癌治疗效果相对较好，生存期往往较长
原发性肝癌能活多久	肝癌的预后取决于患者肿瘤分期，基本情况及综合治疗效果，对于恶性程度低，基本情况较好，以及综合治疗取得很好效果患者，通常预后较好，生存时间较长，建议尽早到医院进行多学科联合诊治，制定个体化治疗方案，从而获得较好的治疗效果，通常来说，早期肝癌治疗效果相对较好，生存期往往较长
多发性肝癌能活多久	肝癌的预后取决于患者肿瘤分期，基本情况及综合治疗效果，对于恶性程度低，基本情况较好，以及综合治疗取得很好效果患者，通常预后较好，生存时间较长，建议尽早到医院进行多学科联合诊治，制定个体化治疗方案，从而获得较好的治疗效果，通常来说，早期肝癌治疗效果相对较好，生存期往往较长
原发性肝癌能活过5年吗	肝癌的预后取决于患者肿瘤分期，基本情况及综合治疗效果，对于恶性程度低，基本情况较好，以及综合治疗取得很好效果患者，通常预后较好，生存时间较长，建议尽早到医院进行多学科联合诊治，制定个体化治疗方案，从而获得较好的治疗效果，通常来说，早期肝癌治疗效果相对较好，生存期往往较长
原发性肝癌转移到肺能活多久	肝癌已经远处转移，此时进行手术治疗是不可取的，但是我们可以进行全身性的治疗、放疗和TACE等治疗，能够适当延长其生存时间，但是具体生存时间是没办法确定的，这与不同患者的身体机能、选择的治疗方法、护理等因素有关。
原发性肝癌转移到肺能活多久	肝癌已经远处转移，此时进行手术治疗是不可取的，但是我们可以进行全身性的治疗、放疗和TACE等治疗，能够适当延长其生存时间，但是具体生存时间是没办法确定的，这与不同患者的身体机能、选择的治疗方法、护理等因素有关。
晚期肝癌转移到肺部，如何治疗才能延长生命	肝癌已经远处转移，此时进行手术治疗是不可取的，但是我们可以进行全身性的治疗、放疗和TACE等治疗，能够适当延长其生存时间，但是具体生存时间是没办法确定的，这与不同患者的身体机能、选择的治疗方法、护理等因素有关。
肝癌不治疗可以活多久?	肝肝癌可以通过多种方式治疗，常见的方式有：肝切除，肝移植，射频等消融术，经动脉化疗栓塞，放疗，全身化疗及分子靶向治疗，治疗方式选择取决于患者肿瘤分期、肝功能情况、当地医疗条件等多种因素，建议到医院专科进行评估，多学科联合治疗
肝癌换肝后能够生存多久呢?	肝癌能否行肝移植术需要医师评估，原位肝移植适用于不耐受肝切除术、孤立肿瘤直径≤5cm或不超过3个单独病变且直径均不超过3cm、无肉眼可见血管侵犯证据、且无淋巴结或远处转移的患者。建议到医院进行评估，判断是否拥有肝移植指征
肝癌晚期输入人血白蛋白还会死吧	白蛋白是机体肝脏分泌的一种重要的血清蛋白成分，具有营养、携带体内物质成分、维持渗透压的功能，但不能提高机体免疫力;肝癌晚期患者肝功较差，自身难以合成白蛋白，出现白蛋白水平低下，需进行必要的外源输注，若白蛋白水平不低，无需进行额外的白蛋白输注。
肝癌晚期脚浮肿生存期	一般肝癌病人出现这类情况时已经到了晚期，生存期有限，身形明显消瘦，精力较差，下肢水肿的出现更是让病人的身体雪上加霜。要积极治疗，可给予利尿药物消除水肿，如白蛋白较低还应适当补充人血白蛋白，尽可能满足病人的基本心理需求，采取有效办法为患者减轻痛苦。
肝癌晚期不吃饭能活多久	肝癌的恶性消耗和侵犯，可能影响患者的消化系统，造成食欲下降，不能经口进食，此时可静脉输入营养液，保证患者的营养摄入，并同时处理其他并发症，可能的话，尽量控制肿瘤的进展，减轻患者的负担，延长患者的生存，积极治疗对患者生存质量意义重大。
肝癌晚期有救吗?	肝癌晚期一般是无法治愈，我们需要做的是尽量延长患者的生存时间，改善患者的生存质量。具体的化疗药物需要进行基因检测进行判断
肝硬化晚期肝癌早期能活多久	肝癌晚期肝硬化患者，其肝脏功能严重受损，并发症出现，此时应尽早评估，对患者进行恰当的治疗，尽可能保证其生存质量，延长生存。
晚期肝癌患者出现脚部水肿，还能活多久	一般肝癌病人出现这类情况时已经到了晚期，生存期有限，身形明显消瘦，精力较差，下肢水肿的出现更是让病人的身体雪上加霜。要积极治疗，可给予利尿药物消除水肿，如白蛋白较低还应适当补充人血白蛋白，尽可能满足病人的基本心理需求，采取有效办法为患者减轻痛苦。
确诊肝癌早期后还能活多久？	确诊为肝癌的话，首选治疗是手术切除，但大部分患者由于肿瘤范围或基础肝功能障碍而不符合手术条件。对于手术不可切除的患者，肝脏移植是唯一可能治愈的其他选择。对于不符合切除术或肝脏移植条件的患者，治疗选择包括局部非手术肿瘤消融方法和全身治疗，前者包括射频消融术(RFA)、经皮无水乙醇注射疗法(PEI)、经动脉化疗栓塞(TACE)和放射治疗(RT)。治疗的选择取决于患者基础肝病的严重程度、肝内肿瘤的大小和分布、血供情况以及患者总体体能状态。目前对于Child-Pugh A级肝硬化、肿瘤直径小于5cm的患者，进行局部肝切除术可使患者的长期总体生存率大于等于40%，据报导，符合如下条件的经过仔细选择的患者结局最好：病灶为单发性、无肝内转移和血管侵犯(肉眼或显微镜下可见侵犯门静脉或肝静脉分支)、肿瘤直径小于等于5cm、阴性手术切缘大于1cm；此类患者的5年生存率高达78%。所以抱以积极的心态治疗，对远…
高分化肝癌能活多久？	分化简单说就是瘤组织的成熟程度，恶性肿瘤或多或少都有向正常细胞分化的特点，瘤细胞分化越接近正常细胞，则越成熟，通常称为高分化。如果瘤细胞分化太差，极不成熟，但仍保留某些来源组织的痕迹，则称为低分化。界于两者之间的称为中分化。高分化肿瘤恶性程度低，生长慢转移率低，预后较好，低分化肿瘤恶性程度高，生长快，转移率高，预后较差。希望患者能积极地科学治疗，提高其生存期。
低分化肝细胞癌能活多久？	分化简单说就是瘤组织的成熟程度，恶性肿瘤或多或少都有向正常细胞分化的特点，瘤细胞分化越接近正常细胞，则越成熟，通常称为高分化。如果瘤细胞分化太差，极不成熟，但仍保留某些来源组织的痕迹，则称为低分化。界于两者之间的称为中分化。高分化肿瘤恶性程度低，生长慢转移率低，预后较好，低分化肿瘤恶性程度高，生长快，转移率高，预后较差。希望患者能积极地科学治疗，提高其生存期。
肝硬化小肝癌能活几年？	肝癌预后取决于患者肿瘤大小，部位，分期，治疗情况以及患者基本情况，不同治疗方式对某一特定患者疗效往往也不一样，因此建议多学科联合会诊，制定个体化治疗方案
高分化肝癌可以活多久？	分化简单说就是瘤组织的成熟程度，恶性肿瘤或多或少都有向正常细胞分化的特点，瘤细胞分化越接近正常细胞，则越成熟，通常称为高分化。如果瘤细胞分化太差，极不成熟，但仍保留某些来源组织的痕迹，则称为低分化。界于两者之间的称为中分化。高分化肿瘤恶性程度低，生长慢转移率低，预后较好，低分化肿瘤恶性程度高，生长快，转移率高，预后较差。希望患者能积极地科学治疗，提高其生存期。
低分化早期肝癌有救吗	分化简单说就是瘤组织的成熟程度，恶性肿瘤或多或少都有向正常细胞分化的特点，瘤细胞分化越接近正常细胞，则越成熟，通常称为高分化。如果瘤细胞分化太差，极不成熟，但仍保留某些来源组织的痕迹，则称为低分化。界于两者之间的称为中分化。高分化肿瘤恶性程度低，生长慢转移率低，预后较好，低分化肿瘤恶性程度高，生长快，转移率高，预后较差。希望患者能积极地科学治疗，提高其生存期。
晚期肝癌患者后背疼痛，还能活多久	后背疼痛的疾病有很多，例如：胰腺炎疼痛可放射至背部，脊柱的肿瘤、结核等疾病也可能导致背部疼痛，背部肌肉的外伤运动劳损也会导致背疼。然而肝癌一般是肝区疼痛即右上腹疼痛，如果有转移性肝癌出现则也可能出现转移部位的疼痛。肝癌患者本身生存期有限，我们需要做的是尽量延长患者的生存时间，改善患者的生存质量。具体的化疗药物需要进行基因检测进行判断
我爸爸肝癌晚期到双腿水肿到底能活多久	一般肝癌病人出现这类情况时已经到了晚期，生存期有限，身形明显消瘦，精力较差，下肢水肿的出现更是让病人的身体雪上加霜。要积极治疗，可给予利尿药物消除水肿，如白蛋白较低还应适当补充人血白蛋白，尽可能满足病人的基本心理需求，采取有效办法为患者减轻痛苦。
请问 肝癌晚期肝硬化腹水已经扩散了还能治吗	对患者进行评估，为患者选择合适的治疗方案，可行控制肿瘤，降低肿瘤负荷对腹水进行抽放和利尿或输白蛋白治疗，预防并处理其他并发症，提高患者的生存质量及治疗效果。
你好，肝癌发现后只是喝中药还能活多久，	肝癌的治疗首选是手术治疗，对于无法手术的患者可以考虑介入或者放化疗，中医主要用于辅助治疗肝癌，提高机体免疫力，改善全身症状。建议咨询专科门诊。
肝癌扩散到血液可以活多久？	其预后取决于转移部位，治疗效果等多个方面。肝癌扩散到血液，有可能就产生远处转移，此时可以药物联合治疗及放疗等措施，对转移患者有一定的疗效，对生存有益。
肝癌晚期患者脸上已经出现了浮肿，还能活多久	一般肝癌病人出现这类情况时已经到了晚期，生存期有限，身形明显消瘦，精力较差，下肢水肿的出现更是让病人的身体雪上加霜。要积极治疗，可给予利尿药物消除水肿，如白蛋白较低还应适当补充人血白蛋白，尽可能满足病人的基本心理需求，采取有效办法为患者减轻痛苦。
肝癌晚期，有腹水，黄疸，还能活多久？	一般肝癌病人出现这类情况时已经到了晚期，生存期有限，身形明显消瘦，精力较差，积极对症去除病因治疗，可给予利尿药物消除水肿，如白蛋白较低还应适当补充人血白蛋白，尽可能满足病人的基本心理需求，采取有效办法为患者减轻痛苦。
74岁老人,得了肝癌还能活多久?	肝癌晚期能活多久是因人而异的，现在患者年纪都74岁了，身体条件有限，选择正确的治疗方法很重要，保持良好心态，遵医嘱治疗，缓解症状，同时注意饮食健康和必要的身体锻炼，是可以适当延长生存，改善生活质量的。
肝癌做了手术能活几年？	肝癌预后取决于患者肿瘤大小，部位，分期，治疗情况以及患者基本情况，不同治疗方式对某一特定患者疗效往往也不一样，因此建议多学科联合会诊，制定个体化治疗方案
肝癌转化肝脑病还能活多长时间	肝癌晚期患者出现了肝昏迷，严重肝功能代偿不全引起的以代谢紊乱为基础的中枢神经系统综合征，说明患者一般状态差，此时应积极寻找肝性脑病发作的诱因，积极防治消化道出血、控制感染、纠正水电解质及酸碱平衡紊乱、禁用损肝药物、禁止大量放腹水等；尽量减少氨的产生，促进氧的代谢。对已发生的肝性脑病，在去除诱因的基础上，首先选用药物治疗，尽量恢复脑细胞功能。
肝癌病人感觉腰疼还能活多长时间	患者腰痛的原因有很多，例如腰部肌肉劳损等腰部病变，但肝癌中晚期患者由于肝肿瘤体积变大，会出现上腹、肝区、腰部闷胀不适或隐痛，宜进一步检查，明确诊断。
肝癌中期能活多久40岁？	中期肝癌患者通常有代偿性肝硬化、没有肝癌症状、没有血管侵犯，但有多发性病灶。中期肝癌首选手术为主的综合治疗。各种手术治疗方法均可获得一定的治疗效果，其中以根治性切除效果最好。肝动脉化疗栓塞（TACE）被广泛用于无法进行手术的肝癌治疗。TACE是经股动脉插管，选择性插入肝癌供血动脉，栓塞主要的肿瘤血管，以阻断肿瘤血供，使肿瘤缺血坏死，并灌注化疗药物以杀死肿瘤细胞。与保守治疗相比，2年存活率可提高20%-25%。
肝癌从早期到死多长时间？	肝癌预后取决于患者肿瘤大小，部位，分期，治疗情况以及患者基本情况，不同治疗方式对某一特定患者疗效往往也不一样，因此建议多学科联合会诊，制定个体化治疗方案
早期肝癌以动了手术还能活多久	早期肝癌手术后的五年生存率可以达到80%以上，即临床上的治愈。而对晚期、中晚期的肝癌，一般认为一年生存率可能不到20%
肝癌晚期骨转移屁股疼还能活多久？	肝癌已经远处转移，此时进行手术治疗是不可取的，但是我们可以进行全身性的治疗、放疗和TACE等治疗，能够适当延长其生存时间，但是具体生存时间是没办法确定的，这与不同患者的身体机能、选择的治疗方法、护理等因素有关。
肝癌晚期出现严重腹胀还能活多久	肝癌晚期腹胀的原因较复杂。一方面是肿瘤的原因，如肝癌晚期患者消化功能较差，经常会出现腹胀，此时可以增加点促进胃肠道蠕动的药物，如吗叮啉；另一方面是肿瘤引起的并发症，如失代偿期肝硬化的基础上发生腹胀，伴大量腹水，且处于难治性状态，临床往往采取腹腔放置引流管措施，进行适当放液，缓解症状，但也带来其他问题。此时都说明患者的状况较差，应积极对症治疗，保障患者的生存质量。
肝癌晚期小腿肿了还能活多久	一般肝癌病人出现这类情况时已经到了晚期，生存期有限，身形明显消瘦，精力较差，下肢水肿的出现更是让病人的身体雪上加霜。要积极治疗，可给予利尿药物消除水肿，如白蛋白较低还应适当补充人血白蛋白，尽可能满足病人的基本心理需求，采取有效办法为患者减轻痛苦。
肝癌晚期出现肝昏迷还能活多久？	肝癌晚期患者出现了肝昏迷，严重肝功能代偿不全引起的以代谢紊乱为基础的中枢神经系统综合征，说明患者一般状态差，此时应积极寻找肝性脑病发作的诱因，积极防治消化道出血、控制感染、纠正水电解质及酸碱平衡紊乱、禁用损肝药物、禁止大量放腹水等；尽量减少氨的产生，促进氧的代谢。对已发生的肝性脑病，在去除诱因的基础上，首先选用药物治疗，尽量恢复脑细胞功能。
肝癌晚期腹水一年了还能活多久	肝癌腹水是晚期肝癌最常见的并发症之一，肝癌患者出现腹水主要是由于慢性肝功能受损，使白蛋白合成减少，血浆胶体渗透压下降或门静高压致细胞内外水液代谢失衡，细胞内的水液向细胞外流失而成腹水。临床往往采取腹腔放置引流管措施，进行适当放液，补充白蛋白，缓解症状，但是其并不影响患者的长期生存。
肝癌患者吐血拉血了还能活多久	肝癌晚期患者吐血和拉血考虑是和肝癌引起的胃底静脉曲张破裂出血是有很大的关系的，同时由于凝血因子的缺乏也是可以导致出血，预后和出血量的大小是有很大的关系，如果大出血的话，是可以引起危及生命的，所以还是及时的就诊，及时的止血，护胃，抑酸，补液等规范治疗。
早期肝癌以动了手术还能活多久	非常早期的肝癌为单发性、无症状、直径<2cm，无血管或远处转移的病变。此情况下，手术切除的存活率为90%。早期肝癌且没有肝硬化的患者手术切除是首选治疗，其中肝叶切除有较好的疗效。对于有肝硬化的肝癌患者，当肿瘤较小（直径<3cm），没有门脉高压症、总胆红素值正常时，手术切除也是最好的选择。但大的肝叶切除有导致肝功能衰竭的危险，目前我国以小肝癌的局部切除代替传统的肝叶切除，可提高切除率，降低手术死亡率。如有适当的捐赠器官，早期肝癌患者也可以考虑肝移植，5年生存率可达75%，且肿瘤复发的风险最低。肝脏移植的优点在于可以同时治疗肿瘤和本身的肝硬化。如不能接受手术或移植，局部灼烧术为最好的替代治疗，其中最常用的为射频灼烧术。临床试验显示，接受射频灼烧术的患者其效果比酒精注射更好，二年的局部复发率是2-18%，1年和2年的存活率分别是100%和98%，但5年复发率高达70%。
肝癌10公分能活多久?	肝癌预后取决于患者肿瘤大小，部位，分期，治疗情况以及患者基本情况，不同治疗方式对某一特定患者疗效往往也不一样，因此建议多学科联合会诊，制定个体化治疗方案
肝癌晚期黑便能活多久?	肝癌晚期患者黑便考虑是和肝癌引起的胃底静脉曲张破裂出血是有很大的关系的，同时由于凝血因子的缺乏也是可以导致出血，预后和出血量的大小是有很大的关系，如果大出血的话，是可以引起危及生命的，所以还是及时的就诊，及时的止血，护胃，抑酸，补液等规范治疗。
肝癌淋巴转移能活多久？	肝癌已经远处转移，此时进行手术治疗是不可取的，但是我们可以进行全身性的治疗、放疗和TACE等治疗，能够适当延长其生存时间，但是具体生存时间是没办法确定的，这与不同患者的身体机能、选择的治疗方法、护理等因素有关。
肝癌晚期切除能活多久？	对于肝癌晚期患者，可以进行手术。如果转移部位单一，瘤体较小，患者体质能够承受手术治疗的情况下，可以考虑手术切除。但是一般来说，肝癌晚期的治疗不提倡手术切除，由于晚期肝癌患者的自身体质弱，或者病情发展扩散转移等，多不适合手术治疗。目前，临床对晚期肝癌化疗效果的评价不是很高，主要是因为肝癌晚期患者除常合并肝硬化外还多伴有不同程度的肝功损害，而化疗的毒副作用可进一步损害肝功能，进而加重患者的病情。同时应针对患者的并发症进行预防与对症处理，可以改善患者的生存质量。
肝癌晚期肚子胀又吃不下是不是要死了	肝癌晚期患者消化系统收到肿瘤的侵犯，表现为胀气、食欲不振，此时可以适当吃点促进肠胃蠕动的药物，饮食清淡注意营养搭配，适当运动，保持身心愉悦，保证生存质量。
肝癌的死亡率高吗？	肝癌预后取决于患者肿瘤大小，部位，分期，治疗情况以及患者基本情况，不同治疗方式对某一特定患者疗效往往也不一样，因此建议多学科联合会诊，制定个体化治疗方案
肝癌拉血吐血能活多久?	消化道出血是肝癌的常见并发症之一，是和肝癌引起的胃底静脉曲张破裂出血是有很大的关系的，同时由于凝血因子的缺乏也是可以导致出血，预后和出血量的大小是有很大的关系，如果大出血的话，是可以引起危及生命的，所以还是及时的就诊，及时的止血，护胃，抑酸，补液等规范治疗。
肝癌最多能活多久？还能治吗？	确诊为肝癌的话，首选治疗是手术切除，但大部分患者由于肿瘤范围或基础肝功能障碍而不符合手术条件。对于手术不可切除的患者，肝脏移植是唯一可能治愈的其他选择。对于不符合切除术或肝脏移植条件的患者，治疗选择包括局部非手术肿瘤消融方法和全身治疗，前者包括射频消融术(RFA)、经皮无水乙醇注射疗法(PEI)、经动脉化疗栓塞(TACE)和放射治疗(RT)。治疗的选择取决于患者基础肝病的严重程度、肝内肿瘤的大小和分布、血供情况以及患者总体体能状态。目前对于Child-Pugh A级肝硬化、肿瘤直径小于5cm的患者，进行局部肝切除术可使患者的长期总体生存率大于等于40%，据报导，符合如下条件的经过仔细选择的患者结局最好：病灶为单发性、无肝内转移和血管侵犯(肉眼或显微镜下可见侵犯门静脉或肝静脉分支)、肿瘤直径小于等于5cm、阴性手术切缘大于1cm；此类患者的5年生存率高达78%。所以抱以积极的心态治疗，对远…
肝癌晚期嗓子哑活多久？	嗓子哑一般不是肝癌晚期患者的并发症，当然不排除存在肝癌的转移的可能，建议去耳鼻喉科或呼吸科就诊检查查明原因。
肝癌晚期唾液带血严重吗还能活多久	唾液带血的症状要认真鉴别是消化道还是呼吸道出血。肝癌晚期患者的凝血功能不全，当发现有出血原因时，应立即予以治疗。建议到医院就诊，明确病因，进行对症治疗。
肝癌晚期还治得好没？	肝癌晚期虽然比较严重，但是也有很多治疗的办法，比如肝动脉化疗栓塞治疗，是目前原发性肝癌非手术治疗的首选方案，疗效比较好，可以提高患者的3年的生存率。还有无水酒精注射疗法，现在比较热的超声引导下微波消融、超声引导下射频消融、高功率聚焦超声、激光治疗等很多物理治疗方法，效果也都非常不错。一般肝癌晚期的患者都需要采用一种或者多种治疗方法联合应用，尽可能的去除肿瘤，修复患者机体的免疫功能，以及保护重要器官的功能。
肝癌晚期骨转移还有救吗还能活多久？	肝癌已经远处转移，此时进行手术治疗是不可取的，但是我们可以进行全身性的治疗、放疗和TACE等治疗，能够适当延长其生存时间，但是具体生存时间是没办法确定的，这与不同患者的身体机能、选择的治疗方法、护理等因素有关。
肝癌晚期还能治得好吗	肝癌晚期虽然比较严重，但是也有很多治疗的办法，比如肝动脉化疗栓塞治疗，是目前原发性肝癌非手术治疗的首选方案，疗效比较好，可以提高患者的3年的生存率。还有无水酒精注射疗法，现在比较热的超声引导下微波消融、超声引导下射频消融、高功率聚焦超声、激光治疗等很多物理治疗方法，效果也都非常不错。一般肝癌晚期的患者都需要采用一种或者多种治疗方法联合应用，尽可能的去除肿瘤，修复患者机体的免疫功能，以及保护重要器官的功能。
肝癌晚期会突然死亡吗	会突然死亡，通常因为其急性病导致。肝癌病人死亡原因一般是肝癌的进展导致其它系统并发症的出现造成病人死亡。主要有以下方面：1.合并感染：处于晚期肝癌的疾病人群，这时期身体机能已经十分衰弱，因为身体的免疫力下降，导致肝癌后期有感染性的并发症疾病出现，特别是容易引发细菌病毒的侵袭，和真菌等病毒的感染，就会加重病情，这时候往往会出现高烧和昏迷等症状，最后就会导致死亡现象发生。2.出血：在肝癌晚期，由于骨髓造血功能发生的异常，血小板就会减少，还因为癌细胞直接破坏到血管，这样很容易导致血管破裂，就会出现大出血，最后就会年轻病人死亡。3.重要脏器损害：身体的肝肾气装受到了严重的损害，那么就会直接破坏桩器的正常结构，就会导致死亡，最重要的脏器是大脑，会影响呼吸和循环中枢，而且还会出现脑出血等现象，也是导致病人死亡的原因。
中分化肝细胞性肝癌生存率如何？	分化简单说就是瘤组织的成熟程度，恶性肿瘤或多或少都有向正常细胞分化的特点，瘤细胞分化越接近正常细胞，则越成熟，通常称为高分化。如果瘤细胞分化太差，极不成熟，但仍保留某些来源组织的痕迹，则称为低分化。界于两者之间的称为中分化。高分化肿瘤恶性程度低，生长慢转移率低，预后较好，低分化肿瘤恶性程度高，生长快，转移率高，预后较差。希望患者能积极地科学治疗，提高其生存期
0.6厘米小肝癌能治愈吗？	0.6cm的小肝癌称之为微小肝癌，据报道，对2cm以下的微小肝癌行根治性手术切除，肿瘤复发风险较低，患者往往可以获得一个较好的预后。
有乙肝、肝硬化的小肝癌能否治愈？	小肝癌是指肝细胞癌中单个癌结节最大直径不超过3cm的肝癌，能否治愈不能一概而论，与肿瘤临床分期、治疗方式密切相关。目前临床上治疗小肝癌主要采用多模式综合治疗方法，包括手术治疗、射频消融、微波消融、介入治疗等。一般来说，早期小肝癌通过多模式综合治疗，多数患者可获得满意的治疗效果，甚至部分患者可达到临床治愈，得到较好的存活。
早期肝癌切除能活多久？	肝癌预后取决于患者肿瘤大小，部位，分期，治疗情况以及患者基本情况，不同治疗方式对某一特定患者疗效往往也不一样，因此建议多学科联合会诊，制定个体化治疗方案
结节性肝癌还能活多久	肝癌预后取决于患者肿瘤大小，部位，分期，治疗情况以及患者基本情况，不同治疗方式对某一特定患者疗效往往也不一样，因此建议多学科联合会诊，制定个体化治疗方案
良性肝癌瘤能活多久	肝脏肿瘤分为良性肿瘤和恶性肿瘤，良性肿瘤包括肝血管瘤，肝囊肿，局灶结节增生等，通常预后较好，恶性肿瘤即肝癌，其预后较差。早期肝癌患者在接受积极规范的治疗后，绝大多数都能达到临床治愈的目的，极少数患者由于病情发展急骤而未能达到临床治愈的目的。中晚期肝癌患者在接受积极规范的治疗后，虽未能达到临床治愈的目的，但生活质量明显得到提升，生存期也在一步步延长。由此可见，早期肝癌患者在接受积极规范的疗法进行治疗后，长期生存是不成问题的。
中晚期肝癌做介入治疗能活多久	介入治疗包括消融术，经动脉栓塞、化疗等，射频消融术指对于病变处局部施以射频热能，使电极周围肿瘤细胞死亡，形成坏死区域，作为不符合肝切除手术患者的一种替代治疗，单个肿瘤且直径小于4cm患者治疗结果往往最好，介入栓塞有一定姑息性治疗效果，放疗适合于有些手术断面有残癌或者术后复发患者，不同介入方法其适应症也不一样，可以到医院找介入科医生评估，同时建议进行多学科联合会诊，制定一个综合诊治方案，从而获得更好的治疗效果
晚期肝癌还能活多久	肝癌晚期一般是无法治愈，生存时间有限，我们需要做的是尽量延长患者的生存时间，改善患者的生存质量。具体的化疗药物需要进行基因检测进行判断
原发性肝癌的预后怎么样？	肝癌预后取决于患者肿瘤大小，部位，分期，治疗情况以及患者基本情况，不同治疗方式对某一特定患者疗效往往也不一样，因此建议多学科联合会诊，制定个体化治疗方案
肝癌最后是怎么死的？	肝癌病人死亡原因一般是肝癌的进展导致其它系统并发症的出现造成病人死亡。主要有以下方面：1.合并感染：处于晚期肝癌的疾病人群，这时期身体机能已经十分衰弱，因为身体的免疫力下降，导致肝癌后期有感染性的并发症疾病出现，特别是容易引发细菌病毒的侵袭，和真菌等病毒的感染，就会加重病情，这时候往往会出现高烧和昏迷等症状，最后就会导致死亡现象发生。2.出血：在肝癌晚期，由于骨髓造血功能发生的异常，血小板就会减少，还因为癌细胞直接破坏到血管，这样很容易导致血管破裂，就会出现大出血，最后就会年轻病人死亡。3.重要脏器损害：身体的肝肾气装受到了严重的损害，那么就会直接破坏桩器的正常结构，就会导致死亡，最重要的脏器是大脑，会影响呼吸和循环中枢，而且还会出现脑出血等现象，也是导致病人死亡的原因。
如果得了肝癌会怎么样？会死吗？	确诊为肝癌的话，首选治疗是手术切除，但大部分患者由于肿瘤范围或基础肝功能障碍而不符合手术条件。对于手术不可切除的患者，肝脏移植是唯一可能治愈的其他选择。对于不符合切除术或肝脏移植条件的患者，治疗选择包括局部非手术肿瘤消融方法和全身治疗，前者包括射频消融术(RFA)、经皮无水乙醇注射疗法(PEI)、经动脉化疗栓塞(TACE)和放射治疗(RT)。治疗的选择取决于患者基础肝病的严重程度、肝内肿瘤的大小和分布、血供情况以及患者总体体能状态。目前对于Child-Pugh A级肝硬化、肿瘤直径小于5cm的患者，进行局部肝切除术可使患者的长期总体生存率大于等于40%，据报导，符合如下条件的经过仔细选择的患者结局最好：病灶为单发性、无肝内转移和血管侵犯(肉眼或显微镜下可见侵犯门静脉或肝静脉分支)、肿瘤直径小于等于5cm、阴性手术切缘大于1cm；此类患者的5年生存率高达78%。所以抱以积极的心态治疗，对远…
肝癌术后复发率高吗	肝癌手术切除后5年肿瘤复发转移率高达40%-70%，这与术前可能已存在微小播散灶或者多中心发生有关，故所有病人术后需要接受密切随访。一旦发现肿瘤复发，根据肿瘤复发的特征，可以选择再次手术切除、局部消融、TACE、放疗或系统治疗等，延长病人生存期。对于高危复发者，有临床研究证实术后TACE治疗有一定的效果，能发现并控制术后肝内微小残癌（证据等级4），但该结论需要进一步证实。此外，对于伴有门静脉癌栓病人术后经门静脉置管化疗联合肝动脉化疗栓塞，也可延长病人生存。
患上了肝癌病它的死亡率高吗？	肝癌预后取决于患者肿瘤大小，部位，分期，治疗情况以及患者基本情况，不同治疗方式对某一特定患者疗效往往也不一样，因此建议多学科联合会诊，制定个体化治疗方案
肝癌转移到淋巴还能活多久	肝癌已经远处转移，此时进行手术治疗是不可取的，但是我们可以进行全身性的治疗、放疗和TACE等治疗，能够适当延长其生存时间，但是具体生存时间是没办法确定的，这与不同患者的身体机能、选择的治疗方法、护理等因素有关。
肝癌转移到骨头能活多久？	肝癌已经远处转移，此时进行手术治疗是不可取的，但是我们可以进行全身性的治疗、放疗和TACE等治疗，能够适当延长其生存时间，但是具体生存时间是没办法确定的，这与不同患者的身体机能、选择的治疗方法、护理等因素有关。
肝癌转移到肺上还能活多久时间	肝癌已经远处转移，此时进行手术治疗是不可取的，但是我们可以进行全身性的治疗、放疗和TACE等治疗，能够适当延长其生存时间，但是具体生存时间是没办法确定的，这与不同患者的身体机能、选择的治疗方法、护理等因素有关。
肝癌手术后五年生存率有多大？	确诊为肝癌的话，首选治疗是手术切除，但大部分患者由于肿瘤范围或基础肝功能障碍而不符合手术条件。对于手术不可切除的患者，肝脏移植是唯一可能治愈的其他选择。对于不符合切除术或肝脏移植条件的患者，治疗选择包括局部非手术肿瘤消融方法和全身治疗，前者包括射频消融术(RFA)、经皮无水乙醇注射疗法(PEI)、经动脉化疗栓塞(TACE)和放射治疗(RT)。治疗的选择取决于患者基础肝病的严重程度、肝内肿瘤的大小和分布、血供情况以及患者总体体能状态。目前对于Child-Pugh A级肝硬化、肿瘤直径小于5cm的患者，进行局部肝切除术可使患者的长期总体生存率大于等于40%，据报导，符合如下条件的经过仔细选择的患者结局最好：病灶为单发性、无肝内转移和血管侵犯(肉眼或显微镜下可见侵犯门静脉或肝静脉分支)、肿瘤直径小于等于5cm、阴性手术切缘大于1cm；此类患者的5年生存率高达78%。
肝癌发现后没有手术只是喝中药还能活多久	确诊为肝癌的话，首选治疗是手术切除，但大部分患者由于肿瘤范围或基础肝功能障碍而不符合手术条件。对于手术不可切除的患者，肝脏移植是唯一可能治愈的其他选择。对于不符合切除术或肝脏移植条件的患者，治疗选择包括局部非手术肿瘤消融方法和全身治疗，前者包括射频消融术(RFA)、经皮无水乙醇注射疗法(PEI)、经动脉化疗栓塞(TACE)和放射治疗(RT)。治疗的选择取决于患者基础肝病的严重程度、肝内肿瘤的大小和分布、血供情况以及患者总体体能状态。目前对于Child-Pugh A级肝硬化、肿瘤直径小于5cm的患者，进行局部肝切除术可使患者的长期总体生存率大于等于40%，据报导，符合如下条件的经过仔细选择的患者结局最好：病灶为单发性、无肝内转移和血管侵犯(肉眼或显微镜下可见侵犯门静脉或肝静脉分支)、肿瘤直径小于等于5cm、阴性手术切缘大于1cm；此类患者的5年生存率高达78%。建议您就诊正规三甲医院，并向…
我母亲75岁，肝癌晚期，现在尿血，很严重吗？还能活多久？	肝癌晚期与患者的基本状况、肿瘤分型、是否有远处转移等多种因素相关，现在患者年纪都75岁了，选择正确的治疗方法很重要，保持良好心态，遵医嘱治疗，缓解症状，同时注意饮食健康和必要的身体锻炼，是可以适当延长生存，改善生活质量的。
巨型肝癌一般存活多长?	巨型肝癌，原发性肝癌的一种，因其癌肿为实体巨块而得名。质地较软，中心部常有出血坏死，周边常有散在的星状瘤结节，一般情况下，不合并或合并轻度的肝硬变。肝癌的治疗效果主要取决与能否早期发现，当然恰当的、适合患者的“个体化”的治疗方案也是影响患者预后的重要因素。还应注意到，患者肝脏基础病变的程度，也是影响预后的极为重要的因素。
一般肝癌做了介入和射频消融还能活多久？	肝癌预后取决于患者肿瘤大小，部位，分期，治疗情况以及患者基本情况，不同治疗方式对某一特定患者疗效往往也不一样，因此建议多学科联合会诊，制定个体化治疗方案
肝癌的死亡率到底有多高？	肝癌预后取决于患者肿瘤大小，部位，分期，治疗情况以及患者基本情况，不同治疗方式对某一特定患者疗效往往也不一样，因此建议多学科联合会诊，制定个体化治疗方案
我28岁得了肝癌早期做了介入治疗后能活多	肝癌预后取决于患者肿瘤大小，部位，分期，治疗情况以及患者基本情况，不同治疗方式对某一特定患者疗效往往也不一样，因此建议多学科联合会诊，制定个体化治疗方案
我28岁得了肝癌早期做了介入治疗后能活多	肝癌预后取决于患者肿瘤大小，部位，分期，治疗情况以及患者基本情况，不同治疗方式对某一特定患者疗效往往也不一样，因此建议多学科联合会诊，制定个体化治疗方案
肝癌恶化还有多久的生存时间？	早期肝癌的五年生存率可以达到80%以上，即临床上的治愈。而对晚期、中晚期的肝癌，一般认为一年生存率可能不到20%
肝癌晚期还能治的好不？	肝癌晚期一般是无法治愈，我们需要做的是尽量延长患者的生存时间，改善患者的生存质量。具体的化疗药物需要进行基因检测进行判断
得了肝癌一般能活多长时间？	肝癌预后取决于患者肿瘤大小，部位，分期，治疗情况以及患者基本情况，不同治疗方式对某一特定患者疗效往往也不一样，因此建议多学科联合会诊，制定个体化治疗方案
得了肝癌还有救吗？	随着目前医疗知识的扩充和技术的改进，肝癌的治疗远期生存率有了很大的提高，所以积极治疗是对患者远期生存率及生存质量有很大好处的。我们知道，肝癌通常是一种侵袭性肿瘤，大部分出现在有基础慢性肝病的情况下。尽管首选治疗是手术切除，但大部分患者由于肿瘤范围或基础肝功能障碍而不符合手术条件。对于手术不可切除的患者，肝脏移植是唯一可能治愈的其他选择。对于不符合切除术或肝脏移植条件的患者，治疗选择包括局部非手术肿瘤消融方法和全身治疗，前者包括射频消融术(RFA)、经皮无水乙醇注射疗法(PEI)、经动脉化疗栓塞(TACE)和放射治疗(RT)。治疗的选择取决于患者基础肝病的严重程度、肝内肿瘤的大小和分布、血供情况以及患者总体体能状态。
肝癌晚期不能吃饭了，还能活多久？	肝癌的恶性消耗和侵犯，可能影响患者的消化系统，造成食欲下降，不能经口进食，此时可静脉输入营养液，保证患者的营养摄入，并同时处理其他并发症，可能的话，尽量控制肿瘤的进展，减轻患者的负担，延长患者的生存。
肝癌晚期一已转移肺部右肩疼痛眼睛模糊还能活多久?	肝癌已经远处转移，此时进行手术治疗是不可取的，但是我们可以进行全身性的治疗、放疗和TACE等治疗，能够适当延长其生存时间，但是具体生存时间是没办法确定的，这与不同患者的身体机能、选择的治疗方法、护理等因素有关。
肝癌晚期，已经转移到脖子，还可以活多久	肝癌已经远处转移，此时进行手术治疗是不可取的，但是我们可以进行全身性的治疗、放疗和TACE等治疗，能够适当延长其生存时间，但是具体生存时间是没办法确定的，这与不同患者的身体机能、选择的治疗方法、护理等因素有关。
肝癌晚期血性腹水每天抽还能活多久呀	肝癌腹水是晚期肝癌最常见的并发症之一，肝癌患者出现腹水主要是由于慢性肝功能受损，使白蛋白合成减少，血浆胶体渗透压下降或门静高压致细胞内外水液代谢失衡，细胞内的水液向细胞外流失而成腹水。临床往往采取腹腔放置引流管措施，进行适当放液，补充白蛋白，缓解症状，但是其并不影响患者的长期生存。
肝癌晚期在服用吗啡止痛药还能活多久	肝癌晚期疼痛是因为肿瘤骨转移或侵犯腹膜后神经，由于可能并发肝性脑病以及吗啡的呼吸抑制作用，此时尽量延长患者的生存时间，改善患者的生存质量。
多发性肝癌能活多久？	对于多发性肝癌来说，手术术仍然是根除多发性肝癌的首选方法，而且肿瘤越小,五年生存率越高。但中晚期肝癌手术治疗效果不佳，但是可以选择合适的介入治疗，仍然会改善换患者的生存质量及生存时间。
良性肝癌能活多久?	您所说的良性肝癌应该是指早期肝癌，患者在接受积极规范的治疗后，绝大多数都能达到临床治愈的目的，极少数患者由于病情发展急骤而未能达到临床治愈的目的。中晚期肝癌患者在接受积极规范的治疗后，虽未能达到临床治愈的目的，但生活质量明显得到提升，生存期也在一步步延长。由此可见，早期肝癌患者在接受积极规范的疗法进行治疗后，长期生存是不成问题的。
肝癌介入后多久能做消融手术	肝癌患者介入治疗以后，没有发热的情况下，待身体恢复后，再考虑做射频消融手术，做手术之前需要查一下凝血功能，查看是否有手术禁忌，通常一般间隔10天左右，患者可以采用保守治疗进行辅助治疗，对病对症的有效控制病情，从根本上减轻、缓解病人的痛苦，提高生活质量，达到理想的治疗效果。
肝癌后期血压低还能活几天	低血压可导致多种并发症，对肝癌患者具有极大威胁。但是并不是所有的低血压都很严重。如果血压低导致患者昏迷等，则需要尽快拨打120急诊抢救。如果患者平素血压就低，我们可以在安全的情况下进行观察。不能简单的观察血压的数值，建议积极就诊寻找低血压的原因，从根本上发现并解决问题。
肝癌晚期脚肿还能活多久	一般肝癌病人出现这类情况时已经到了晚期，身形明显消瘦，精力较差，下肢水肿的出现更是让病人的身体雪上加霜。要积极治疗，可给予利尿药物消除水肿，如白蛋白较低还应适当补充人血白蛋白，尽可能满足病人的基本心理需求，采取有效办法为患者减轻痛苦。
肝癌扩散了还能活多久？	肝癌扩散这就涉及到了扩散的范围问题。如果仅限于肝内转移，并且转移灶仅限于一侧肝脏内，在无其他手术禁忌症的情况下，可行手术治疗。但如果是肝内广泛转移甚至是肝外转移，例如：肺、脑、骨等器官，则无法行外科手术治疗，可选择其他保守治疗等方式。但是其他多药物联合治疗效果不好，建议多学科会诊。
肝癌脑转移还能活多久?	肝癌已经脑转移，此时进行手术治疗是不可取的，但是我们可以进行全身性的治疗、放疗和TACE等治疗，能够适当延长其生存时间，但是具体生存时间是没办法确定的，这与不同患者的身体机能、选择的治疗方法、护理等因素有关。
肝癌肝昏迷还能活多久?	肝癌晚期患者出现了肝昏迷，严重肝功能代偿不全引起的以代谢紊乱为基础的中枢神经系统综合征，说明患者一般状态差，此时应积极寻找肝性脑病发作的诱因，积极防治消化道出血、控制感染、纠正水电解质及酸碱平衡紊乱、禁用损肝药物、禁止大量放腹水等；尽量减少氨的产生，促进氧的代谢。对已发生的肝性脑病，在去除诱因的基础上，首先选用药物治疗，尽量恢复脑细胞功能。
肝癌晚期便血还能活多久？	便血的原因主要有以下几个方面：：一、溃疡性结肠炎，常表现为黏液脓血便或血便，会伴有腹部的隐痛、腹胀。二、克罗恩病，其表现跟溃疡性结肠炎相同，需要做电子结肠镜和结肠镜下病理活检来明确。三，痔疮或肛裂，这两种病会表现有肛门坠胀感，解大便时肛门有撕裂样疼痛，一般在大便后会有滴血，或表现为手纸上有鲜血，需要做指肛检查来明确。此外，消化性溃疡和胃底食管静脉曲张，引起的大量出血，也会表现为大便拉鲜血，一般呈暗红色的血便，会伴有上腹的隐痛或既往有肝病的病史，需要做胃镜检查来明确。 所以明确病因对肝癌患者的治疗至关重要。
肝癌晚期吐血还能活多久呢？	吐血的原因有口腔的出血，食管胃底静脉曲张的出血，口腔的初步检查便可确定是否是口腔的出血，若排除便及时做胃镜检查，必要时积极胃镜下治疗。
肝癌换肝一般能活多久？	肝移植的多个不同国内标准扩大了肝癌肝移植的适用范围，可使更多的肝癌病人因肝移植手术受益，并未明显降低术后总体生存率和无瘤生存率。但是肝癌肝移植术后的肿瘤复发明显减低了移植后生存率。其危险因素包括肿瘤分期、血管侵犯、AFP水平、免疫抑制剂累积用药剂量量，故定期随访检查对术后至关重要，发现问题及时治疗。
肝癌转移肺癌还能活多久	肝癌的预后取决于患者肿瘤分期，基本情况及综合治疗效果，对于恶性程度低，基本情况较好，以及综合治疗取得很好效果患者，通常预后较好，生存时间较长，建议尽早到医院进行多学科联合诊治，制定个体化治疗方案，从而获得较好的治疗效果
肝癌晚期扩散还能活多久?	肝癌扩散这就涉及到了扩散的范围问题。如果仅限于肝内转移，并且转移灶仅限于一侧肝脏内，在无其他手术禁忌症的情况下，可行手术治疗。但如果是肝内广泛转移甚至是肝外转移，例如：肺、脑、骨等器官，则无法行外科手术治疗，可选择其他保守治疗等方式。但是其他多药物联合治疗效果不好，建议多学科会诊。
[truncated: 2,276 more rows]

## Sheet: Sheet1 【未删除类别4289】
question	answer
肝癌转移到肠的症状？	肝癌发生肠道转移，除原发性疾病的症状外，肠道症状是否出现及性质、严重程度取决于转移灶的大小、数目、位置等，症状不典型，主要表现可能有：腹痛腹胀、黑便、消瘦、乏力、贫血、消化道梗阻等症状。
肝癌转移到脑部的症状？	肝癌发生脑转移，除原发性疾病的症状外，脑部症状是否出现及严重程度取决于疾病的进展，主要表现可能有：1、定位症状：与转移瘤所损害的功能区有关，如感觉障碍、对方向、位置的辨别能力丧失，幻视、偏盲、不能计算，并有失读和失写等。 2、颅内压增高症状：头痛、呕吐、视神经水肿等。
肝癌转移到肺的症状	肝癌发生肺转移，除原发性疾病的症状外，肺部症状是否出现及严重程度取决于疾病的进展，主要表现可能有：咳嗽咳血、呼吸困难、血性胸水、胸部疼痛等症状。
肝癌转移是什么意思？	肝癌转移是肝脏的恶性肿瘤通过血行转移、淋巴转移、种植性转移、直接侵犯等各种方式转移到肝脏其他部位或远处其他器官。肝癌的转移可分为肝内转移和肝外转移。由于肝内有许多丰富的血窦,因此肝内转移最为常见,多数肝癌患者在早期即可有肝内转移。肝外转移多见于肝癌晚期,是由于癌细胞累及肝静脉后进入体循环以及浸润种植等其他方式转移至全身各部,可涉及肺、脑、骨骼、肾上腺、腹膜、淋巴结等部位。
原发性肝癌最常见转移方式是？	血行转移是肝癌转移中最为常见的转移方式，首先是肝内的转移，如形成门静脉癌栓，门静脉癌栓表现为肝癌同侧的门静脉分支内有实质性的癌栓，有的癌栓可以沿门静脉生长到门静脉的主干。肝内转移可以表现为在肝癌结节的周围有多发的小的转移灶，把这些转移灶称之为卫星灶或子灶。肝癌也可以经过血液途径转移到远处的器官，形成转移灶。如肺、骨、肾上腺、脑等处。
请问肝癌转移到肾上腺还能做肝脏转移吗	目前临床上肝癌伴发远处转移不考虑行肝移植手术，可考虑其他的治疗方案如放疗、化疗，介入等。具体治疗方案应就诊于正规医院，联合肝胆外科、泌尿外科、肿瘤内科等多学科会诊后决定具体的治疗方案。
如何判断肝癌有没有转移？	肝癌的转移可分为肝内转移和肝外转移。多数肝癌患者在早期即可有肝内转移。肝外转移多见于肝癌晚期,是由于癌细胞累及肝静脉后进入体循环以及浸润种植等其他方式转移至全身各部,可涉及肺、脑、骨骼、肾上腺、腹膜、淋巴结等部位。在相应位置早期可无明显症状，随着疾病进展出现相应的症状，如肺转移出现胸痛、咳嗽等。如综合患者情况考虑存在转移可能，可行相应位置的影像学检查。亦可直接行全身PET-CT检查排除转移灶。
原发性肝癌会转移吗？	肝癌转移是肝脏的恶性肿瘤通过血行转移、淋巴转移、种植性转移、直接侵犯等各种方式转移到肝脏其他部位或远处其他器官。可分为肝内转移和肝外转移。由于肝内有许多丰富的血窦,因此肝内转移最为常见,多数肝癌患者在早期即可有肝内转移。肝外转移多见于肝癌晚期,是由于癌细胞累及肝静脉后进入体循环以及浸润种植等其他方式转移至全身各部,可涉及肺、脑、骨骼、肾上腺、腹膜、淋巴结等部位。由此可见，原发性肝癌存在转移的可能。
原发性肝癌会扩散吗？	肝癌转移是肝脏的恶性肿瘤通过血行转移、淋巴转移、种植性转移、直接侵犯等各种方式转移到肝脏其他部位或远处其他器官。可分为肝内转移和肝外转移。由于肝内有许多丰富的血窦,因此肝内转移最为常见,多数肝癌患者在早期即可有肝内转移。肝外转移多见于肝癌晚期,是由于癌细胞累及肝静脉后进入体循环以及浸润种植等其他方式转移至全身各部,可涉及肺、脑、骨骼、肾上腺、腹膜、淋巴结等部位。由此可见，原发性肝癌存在转移的可能。
肝癌转移到骨头怎么办?	肝癌骨转移病情多较晚，多数患者为多发性骨破坏。目前临床上可在积极控制肿瘤原发灶的基础上对骨转移灶采取手术、介入、放疗、二磷酸盐类药物治疗、疼痛治疗等方法。建议正规医疗机构就诊，由专科医生根据患者情况制定治疗方案。
肝癌骨转移还有救吗？	肝癌骨转移病情多较晚，多数患者为多发性骨破坏。目前临床上可在积极控制肿瘤原发灶的基础上对骨转移灶采取手术、介入、放疗、二磷酸盐类药物治疗、疼痛治疗等方法。建议正规医疗机构就诊，由专科医生根据患者情况制定治疗方案。
肝癌转移腹腔怎么治疗？	肝癌腹腔种植转移病情较晚，一般无手术指征，多采取放化疗方法。建议正规医院肿瘤内科就诊，根据患者综合情况确定治疗方案。
肝癌转移淋巴治疗方法	肝癌合并淋巴结转移病情多较晚，预后不佳。目前可根据患者综合情况选择手术治疗、介入治疗、放化疗等方法，其中手术切除应注意对淋巴结的探查及清扫。建议正规医疗机构就诊，由专科医生根据患者情况制定治疗方案。
肝癌淋巴转移怎么办？	肝癌合并淋巴结转移病情多较晚，预后不佳。目前可根据患者综合情况选择手术治疗、介入治疗、放化疗等方法，其中手术切除应注意对淋巴结的探查及清扫。建议正规医疗机构就诊，由专科医生根据患者情况制定治疗方案。
肝癌淋巴结转移怎么治疗	肝癌合并淋巴结转移病情多较晚，预后不佳。目前可根据患者综合情况选择手术治疗、介入治疗、放化疗等方法，其中手术切除应注意对淋巴结的探查及清扫。建议正规医疗机构就诊，由专科医生根据患者情况制定治疗方案。
肝癌肝内转移怎么治疗?	肝癌最早在肝内转移，很容易侵犯门静脉及分支并形成瘤栓，脱落后在肝内引起多发性转移灶，首选的治疗方法是进行手术切除，可根据转移灶的大小、数目、分布范围决定手术方式。在无手术指征时可选择射频消融、介入、放化疗、肝移植等方法。建议正规医疗机构就诊，由专科医生根据患者情况制定治疗方案。
肝癌肝内转移怎么办？	肝癌最早在肝内转移，很容易侵犯门静脉及分支并形成瘤栓，脱落后在肝内引起多发性转移灶，首选的治疗方法是进行手术切除，可根据转移灶的大小、数目、分布范围决定手术方式。在无手术指征时可选择射频消融、介入、放化疗、肝移植等方法。建议正规医疗机构就诊，由专科医生根据患者情况制定治疗方案。
肝癌手术后肝内转移应该怎么办?	肝癌最早在肝内转移，很容易侵犯门静脉及分支并形成瘤栓，脱落后在肝内引起多发性转移灶，首选的治疗方法是进行手术切除，可根据转移灶的大小、数目、分布范围决定手术方式。在无手术指征时可选择射频消融、介入、放化疗、肝移植等方法。建议正规医疗机构就诊，由专科医生根据患者情况制定治疗方案。
爸爸肝癌已经转移到肺部了怎么办？	肝癌肺转移发生时患者病情多属于晚期，目前普遍观点主张在积极控制肝内病灶和严格把握各种治疗技术的适应征的前提下，依据患者ECOG评分、Child-Pugh分级，以及原发病灶和肺部继发性肿瘤的部位、大小、数目、有无血管侵犯等差异选择治疗方案，包括肺部外科手术治疗、血管介入治疗、局部消融治疗、放射治疗、药物化疗、分子靶向治疗等。建议正规医疗机构就诊，由专科医生根据患者情况制定个体化治疗方案及联合多种方式的综合治疗。
肝癌肺转移后怎么办？	肝癌肺转移发生时患者病情多属于晚期，目前普遍观点主张在积极控制肝内病灶和严格把握各种治疗技术的适应征的前提下，依据患者ECOG评分、Child-Pugh分级，以及原发病灶和肺部继发性肿瘤的部位、大小、数目、有无血管侵犯等差异选择治疗方案，包括肺部外科手术治疗、血管介入治疗、局部消融治疗、放射治疗、药物化疗、分子靶向治疗等。建议正规医疗机构就诊，由专科医生根据患者情况制定个体化治疗方案及联合多种方式的综合治疗。
肝癌转移到肺有1厘米阴影能不能做手术	肝癌肺转移发生时患者病情多属于晚期，目前普遍观点主张在积极控制肝内病灶和严格把握各种治疗技术的适应征的前提下，依据患者ECOG评分、Child-Pugh分级，以及原发病灶和肺部继发性肿瘤的部位、大小、数目、有无血管侵犯等差异选择治疗方案，包括肺部外科手术治疗、血管介入治疗、局部消融治疗、放射治疗、药物化疗、分子靶向治疗等。建议正规医疗机构就诊，由专科医生根据患者情况制定个体化治疗方案及联合多种方式的综合治疗。
肝癌转移到肺能治吗?	肝癌肺转移发生时患者病情多属于晚期，目前普遍观点主张在积极控制肝内病灶和严格把握各种治疗技术的适应征的前提下，依据患者ECOG评分、Child-Pugh分级，以及原发病灶和肺部继发性肿瘤的部位、大小、数目、有无血管侵犯等差异选择治疗方案，包括肺部外科手术治疗、血管介入治疗、局部消融治疗、放射治疗、药物化疗、分子靶向治疗等。建议正规医疗机构就诊，由专科医生根据患者情况制定个体化治疗方案及联合多种方式的综合治疗。
肝癌肺转移怎么治疗	肝癌肺转移发生时患者病情多属于晚期，目前普遍观点主张在积极控制肝内病灶和严格把握各种治疗技术的适应征的前提下，依据患者ECOG评分、Child-Pugh分级，以及原发病灶和肺部继发性肿瘤的部位、大小、数目、有无血管侵犯等差异选择治疗方案，包括肺部外科手术治疗、血管介入治疗、局部消融治疗、放射治疗、药物化疗、分子靶向治疗等。建议正规医疗机构就诊，由专科医生根据患者情况制定个体化治疗方案及联合多种方式的综合治疗。
肝癌脑转移怎么治疗？	肝癌脑转移发生时患者病情多属于晚期，对于晚期肝癌脑转移治疗难度相当大，临床上目前主张在积极控制肝内病灶和严格把握各种治疗技术的适应征的前提下选择手术治疗或放化疗。建议正规医疗机构就诊，由专科医生根据患者情况制定治疗方案。
肝门静脉癌栓可以控制吗？	手术切除是肝癌合并门静脉癌栓患者首选并有可能治愈的方法，但大部分患者发现时已失去手术机会，且术后复发率较高。目前临床应用的非手术治疗主要有TACE、肝动脉灌注化疗、放疗、区域性治疗、靶向治疗等。建议正规医疗机构就诊，由专科医生根据患者情况制定治疗方案。
肝癌肺转移吃什么靶向药？	肝癌肺转移发生时患者病情多属于晚期，目前临床上用于治疗肝癌的分子靶向药物主要为索拉菲尼，它是一种口服的多酶抑制剂，通过选择性作用于 RAF激酶从而抑制肿瘤细胞增殖。除索拉菲尼外，一系列新的靶向药物正在临床试验研究中，如舒尼替尼、布立尼布、利尼伐尼、雷莫芦单抗、阿帕替尼和厄洛替尼等，其临床疗效还需要进一步证实。除化疗外，还可选择外科手术治疗，放疗等方法。建议正规医疗机构就诊，由专科医生根据患者情况制定个体化治疗方案及联合多种方式的综合治疗。
吃了肝癌病人的口水唾液会传染肝癌？	肝癌疾病本身并不具备传染性。传染必须具备三个条件：传染源、传播途径及易感染人群。首先癌细胞并不是传染源，它只能在患者的体内进行扩散，不能自发对患者以外的人体进行传染，因此，能够形成传染的第一条途径就已经不完整了，故传染无法形成。因此，与肝癌患者进行日常接触如共同用餐、拥抱等不会造成传染。肝癌也不会通过空气、唾液、腹水及性生活传染其他人。同理，肝硬化也不会感染他人。平时肝脏疾病方面所说的传染是指病毒性肝炎的传染，多指乙肝及丙肝。如乙型肝炎可以通过母婴、血液、性交等方式传播。
肝癌晚期全身变黄了具有传染性吗？	肝癌疾病本身并不具备传染性。传染必须具备三个条件：传染源、传播途径及易感染人群。首先癌细胞并不是传染源，它只能在患者的体内进行扩散，不能自发对患者以外的人体进行传染，因此，能够形成传染的第一条途径就已经不完整了，故传染无法形成。因此，与肝癌患者进行日常接触如共同用餐、拥抱等不会造成传染。肝癌也不会通过空气、唾液、腹水及性生活传染其他人。同理，肝硬化也不会感染他人。平时肝脏疾病方面所说的传染是指病毒性肝炎的传染，多指乙肝及丙肝。如乙型肝炎可以通过母婴、血液、性交等方式传播。
肝癌肺部感染了会不会传染给家里人？	肝癌疾病本身并不具备传染性。传染必须具备三个条件：传染源、传播途径及易感染人群。首先癌细胞并不是传染源，它只能在患者的体内进行扩散，不能自发对患者以外的人体进行传染，因此，能够形成传染的第一条途径就已经不完整了，故传染无法形成。因此，与肝癌患者进行日常接触如共同用餐、拥抱等不会造成传染。肝癌也不会通过空气、唾液、腹水及性生活传染其他人。同理，肝硬化也不会感染他人。平时肝脏疾病方面所说的传染是指病毒性肝炎的传染，多指乙肝及丙肝。如乙型肝炎可以通过母婴、血液、性交等方式传播。
肝癌晚期在空气中会不会传染？	肝癌疾病本身并不具备传染性。传染必须具备三个条件：传染源、传播途径及易感染人群。首先癌细胞并不是传染源，它只能在患者的体内进行扩散，不能自发对患者以外的人体进行传染，因此，能够形成传染的第一条途径就已经不完整了，故传染无法形成。因此，与肝癌患者进行日常接触如共同用餐、拥抱等不会造成传染。肝癌也不会通过空气、唾液、腹水及性生活传染其他人。同理，肝硬化也不会感染他人。平时肝脏疾病方面所说的传染是指病毒性肝炎的传染，多指乙肝及丙肝。如乙型肝炎可以通过母婴、血液、性交等方式传播。
照顾肝癌晚期会传染吗?	肝癌疾病本身并不具备传染性。传染必须具备三个条件：传染源、传播途径及易感染人群。首先癌细胞并不是传染源，它只能在患者的体内进行扩散，不能自发对患者以外的人体进行传染，因此，能够形成传染的第一条途径就已经不完整了，故传染无法形成。因此，与肝癌患者进行日常接触如共同用餐、拥抱等不会造成传染。肝癌也不会通过空气、唾液、腹水及性生活传染其他人。同理，肝硬化也不会感染他人。平时肝脏疾病方面所说的传染是指病毒性肝炎的传染，多指乙肝及丙肝。如乙型肝炎可以通过母婴、血液、性交等方式传播。
乙肝肝癌晚期会传染吗？	肝癌疾病本身并不具备传染性。传染必须具备三个条件：传染源、传播途径及易感染人群。首先癌细胞并不是传染源，它只能在患者的体内进行扩散，不能自发对患者以外的人体进行传染，因此，能够形成传染的第一条途径就已经不完整了，故传染无法形成。因此，与肝癌患者进行日常接触如共同用餐、拥抱等不会造成传染。肝癌也不会通过空气、唾液、腹水及性生活传染其他人。同理，肝硬化也不会感染他人。平时肝脏疾病方面所说的传染是指病毒性肝炎的传染，多指乙肝及丙肝。如乙型肝炎可以通过母婴、血液、性交等方式传播。
接触肝癌腹水会传染吗？	肝癌疾病本身并不具备传染性。传染必须具备三个条件：传染源、传播途径及易感染人群。首先癌细胞并不是传染源，它只能在患者的体内进行扩散，不能自发对患者以外的人体进行传染，因此，能够形成传染的第一条途径就已经不完整了，故传染无法形成。因此，与肝癌患者进行日常接触如共同用餐、拥抱等不会造成传染。肝癌也不会通过空气、唾液、腹水及性生活传染其他人。同理，肝硬化也不会感染他人。平时肝脏疾病方面所说的传染是指病毒性肝炎的传染，多指乙肝及丙肝。如乙型肝炎可以通过母婴、血液、性交等方式传播。
和肝癌病人吃饭传染吗？	肝癌疾病本身并不具备传染性。传染必须具备三个条件：传染源、传播途径及易感染人群。首先癌细胞并不是传染源，它只能在患者的体内进行扩散，不能自发对患者以外的人体进行传染，因此，能够形成传染的第一条途径就已经不完整了，故传染无法形成。因此，与肝癌患者进行日常接触如共同用餐、拥抱等不会造成传染。肝癌也不会通过空气、唾液、腹水及性生活传染其他人。同理，肝硬化也不会感染他人。平时肝脏疾病方面所说的传染是指病毒性肝炎的传染，多指乙肝及丙肝。如乙型肝炎可以通过母婴、血液、性交等方式传播。
和肝癌的人一起吃饭会传染吗？	肝癌疾病本身并不具备传染性。传染必须具备三个条件：传染源、传播途径及易感染人群。首先癌细胞并不是传染源，它只能在患者的体内进行扩散，不能自发对患者以外的人体进行传染，因此，能够形成传染的第一条途径就已经不完整了，故传染无法形成。因此，与肝癌患者进行日常接触如共同用餐、拥抱等不会造成传染。肝癌也不会通过空气、唾液、腹水及性生活传染其他人。同理，肝硬化也不会感染他人。平时肝脏疾病方面所说的传染是指病毒性肝炎的传染，多指乙肝及丙肝。如乙型肝炎可以通过母婴、血液、性交等方式传播。
因为乙肝引起的肝癌患者会传染吗？	肝癌疾病本身并不具备传染性。传染必须具备三个条件：传染源、传播途径及易感染人群。首先癌细胞并不是传染源，它只能在患者的体内进行扩散，不能自发对患者以外的人体进行传染，因此，能够形成传染的第一条途径就已经不完整了，故传染无法形成。因此，与肝癌患者进行日常接触如共同用餐、拥抱等不会造成传染。肝癌也不会通过空气、唾液、腹水及性生活传染其他人。同理，肝硬化也不会感染他人。平时肝脏疾病方面所说的传染是指病毒性肝炎的传染，多指乙肝及丙肝。如乙型肝炎可以通过母婴、血液、性交等方式传播。
我家人得了肝癌共用餐具会传染吗？	肝癌疾病本身并不具备传染性。传染必须具备三个条件：传染源、传播途径及易感染人群。首先癌细胞并不是传染源，它只能在患者的体内进行扩散，不能自发对患者以外的人体进行传染，因此，能够形成传染的第一条途径就已经不完整了，故传染无法形成。因此，与肝癌患者进行日常接触如共同用餐、拥抱等不会造成传染。肝癌也不会通过空气、唾液、腹水及性生活传染其他人。同理，肝硬化也不会感染他人。平时肝脏疾病方面所说的传染是指病毒性肝炎的传染，多指乙肝及丙肝。如乙型肝炎可以通过母婴、血液、性交等方式传播。
家有肝癌患者不分碗筷会传染吗？	肝癌疾病本身并不具备传染性。传染必须具备三个条件：传染源、传播途径及易感染人群。首先癌细胞并不是传染源，它只能在患者的体内进行扩散，不能自发对患者以外的人体进行传染，因此，能够形成传染的第一条途径就已经不完整了，故传染无法形成。因此，与肝癌患者进行日常接触如共同用餐、拥抱等不会造成传染。肝癌也不会通过空气、唾液、腹水及性生活传染其他人。同理，肝硬化也不会感染他人。平时肝脏疾病方面所说的传染是指病毒性肝炎的传染，多指乙肝及丙肝。如乙型肝炎可以通过母婴、血液、性交等方式传播。
有肝癌晚期病人，陪护家属怕传染，陪护家属应该去医院吗？	肝癌疾病本身并不具备传染性。传染必须具备三个条件：传染源、传播途径及易感染人群。首先癌细胞并不是传染源，它只能在患者的体内进行扩散，不能自发对患者以外的人体进行传染，因此，能够形成传染的第一条途径就已经不完整了，故传染无法形成。因此，与肝癌患者进行日常接触如共同用餐、拥抱等不会造成传染。肝癌也不会通过空气、唾液、腹水及性生活传染其他人。同理，肝硬化也不会感染他人。平时肝脏疾病方面所说的传染是指病毒性肝炎的传染，多指乙肝及丙肝。如乙型肝炎可以通过母婴、血液、性交等方式传播。
请问肺癌肝癌晚期具有传染性吗	肝癌疾病本身并不具备传染性。传染必须具备三个条件：传染源、传播途径及易感染人群。首先癌细胞并不是传染源，它只能在患者的体内进行扩散，不能自发对患者以外的人体进行传染，因此，能够形成传染的第一条途径就已经不完整了，故传染无法形成。因此，与肝癌患者进行日常接触如共同用餐、拥抱等不会造成传染。肝癌也不会通过空气、唾液、腹水及性生活传染其他人。同理，肝硬化也不会感染他人。平时肝脏疾病方面所说的传染是指病毒性肝炎的传染，多指乙肝及丙肝。如乙型肝炎可以通过母婴、血液、性交等方式传播。
肝癌黄疸有传染吗？	肝癌疾病本身并不具备传染性。传染必须具备三个条件：传染源、传播途径及易感染人群。首先癌细胞并不是传染源，它只能在患者的体内进行扩散，不能自发对患者以外的人体进行传染，因此，能够形成传染的第一条途径就已经不完整了，故传染无法形成。因此，与肝癌患者进行日常接触如共同用餐、拥抱等不会造成传染。肝癌也不会通过空气、唾液、腹水及性生活传染其他人。同理，肝硬化也不会感染他人。平时肝脏疾病方面所说的传染是指病毒性肝炎的传染，多指乙肝及丙肝。如乙型肝炎可以通过母婴、血液、性交等方式传播。
肝癌夫妻会传染吗?	肝癌疾病本身并不具备传染性。传染必须具备三个条件：传染源、传播途径及易感染人群。首先癌细胞并不是传染源，它只能在患者的体内进行扩散，不能自发对患者以外的人体进行传染，因此，能够形成传染的第一条途径就已经不完整了，故传染无法形成。因此，与肝癌患者进行日常接触如共同用餐、拥抱等不会造成传染。肝癌也不会通过空气、唾液、腹水及性生活传染其他人。同理，肝硬化也不会感染他人。平时肝脏疾病方面所说的传染是指病毒性肝炎的传染，多指乙肝及丙肝。如乙型肝炎可以通过母婴、血液、性交等方式传播。
肝癌破裂会传染吗？	肝癌疾病本身并不具备传染性。传染必须具备三个条件：传染源、传播途径及易感染人群。首先癌细胞并不是传染源，它只能在患者的体内进行扩散，不能自发对患者以外的人体进行传染，因此，能够形成传染的第一条途径就已经不完整了，故传染无法形成。因此，与肝癌患者进行日常接触如共同用餐、拥抱等不会造成传染。肝癌也不会通过空气、唾液、腹水及性生活传染其他人。同理，肝硬化也不会感染他人。平时肝脏疾病方面所说的传染是指病毒性肝炎的传染，多指乙肝及丙肝。如乙型肝炎可以通过母婴、血液、性交等方式传播。
肝癌晚期腹水传染吗	肝癌疾病本身并不具备传染性。传染必须具备三个条件：传染源、传播途径及易感染人群。首先癌细胞并不是传染源，它只能在患者的体内进行扩散，不能自发对患者以外的人体进行传染，因此，能够形成传染的第一条途径就已经不完整了，故传染无法形成。因此，与肝癌患者进行日常接触如共同用餐、拥抱等不会造成传染。肝癌也不会通过空气、唾液、腹水及性生活传染其他人。同理，肝硬化也不会感染他人。平时肝脏疾病方面所说的传染是指病毒性肝炎的传染，多指乙肝及丙肝。如乙型肝炎可以通过母婴、血液、性交等方式传播。
肝癌晚期会通过什么途径传染	肝癌疾病本身并不具备传染性。传染必须具备三个条件：传染源、传播途径及易感染人群。首先癌细胞并不是传染源，它只能在患者的体内进行扩散，不能自发对患者以外的人体进行传染，因此，能够形成传染的第一条途径就已经不完整了，故传染无法形成。因此，与肝癌患者进行日常接触如共同用餐、拥抱等不会造成传染。肝癌也不会通过空气、唾液、腹水及性生活传染其他人。同理，肝硬化也不会感染他人。平时肝脏疾病方面所说的传染是指病毒性肝炎的传染，多指乙肝及丙肝。如乙型肝炎可以通过母婴、血液、性交等方式传播。
肝癌病人的唾液口水粘到我的伤口上会传染肝癌么？	肝癌疾病本身并不具备传染性。传染必须具备三个条件：传染源、传播途径及易感染人群。首先癌细胞并不是传染源，它只能在患者的体内进行扩散，不能自发对患者以外的人体进行传染，因此，能够形成传染的第一条途径就已经不完整了，故传染无法形成。因此，与肝癌患者进行日常接触如共同用餐、拥抱等不会造成传染。肝癌也不会通过空气、唾液、腹水及性生活传染其他人。同理，肝硬化也不会感染他人。平时肝脏疾病方面所说的传染是指病毒性肝炎的传染，多指乙肝及丙肝。如乙型肝炎可以通过母婴、血液、性交等方式传播。
和肝癌病人接触要注意什么？	肝癌疾病本身并不具备传染性。传染必须具备三个条件：传染源、传播途径及易感染人群。首先癌细胞并不是传染源，它只能在患者的体内进行扩散，不能自发对患者以外的人体进行传染，因此，能够形成传染的第一条途径就已经不完整了，故传染无法形成。因此，与肝癌患者进行日常接触如共同用餐、拥抱等不会造成传染。肝癌也不会通过空气、唾液、腹水及性生活传染其他人。同理，肝硬化也不会感染他人。平时肝脏疾病方面所说的传染是指病毒性肝炎的传染，多指乙肝及丙肝。如乙型肝炎可以通过母婴、血液、性交等方式传播。
一起吃饭肝癌会传染吗	肝癌疾病本身并不具备传染性。传染必须具备三个条件：传染源、传播途径及易感染人群。首先癌细胞并不是传染源，它只能在患者的体内进行扩散，不能自发对患者以外的人体进行传染，因此，能够形成传染的第一条途径就已经不完整了，故传染无法形成。因此，与肝癌患者进行日常接触如共同用餐、拥抱等不会造成传染。肝癌也不会通过空气、唾液、腹水及性生活传染其他人。同理，肝硬化也不会感染他人。平时肝脏疾病方面所说的传染是指病毒性肝炎的传染，多指乙肝及丙肝。如乙型肝炎可以通过母婴、血液、性交等方式传播。
姥爷是肝癌晚期，现在转移到肺了，这样会不会传染呢，	肝癌疾病本身并不具备传染性。传染必须具备三个条件：传染源、传播途径及易感染人群。首先癌细胞并不是传染源，它只能在患者的体内进行扩散，不能自发对患者以外的人体进行传染，因此，能够形成传染的第一条途径就已经不完整了，故传染无法形成。因此，与肝癌患者进行日常接触如共同用餐、拥抱等不会造成传染。肝癌也不会通过空气、唾液、腹水及性生活传染其他人。同理，肝硬化也不会感染他人。平时肝脏疾病方面所说的传染是指病毒性肝炎的传染，多指乙肝及丙肝。如乙型肝炎可以通过母婴、血液、性交等方式传播。
以前是乙肝现在转成肝癌了，会不会传染	肝癌疾病本身并不具备传染性。传染必须具备三个条件：传染源、传播途径及易感染人群。首先癌细胞并不是传染源，它只能在患者的体内进行扩散，不能自发对患者以外的人体进行传染，因此，能够形成传染的第一条途径就已经不完整了，故传染无法形成。因此，与肝癌患者进行日常接触如共同用餐、拥抱等不会造成传染。肝癌也不会通过空气、唾液、腹水及性生活传染其他人。同理，肝硬化也不会感染他人。平时肝脏疾病方面所说的传染是指病毒性肝炎的传染，多指乙肝及丙肝。如乙型肝炎可以通过母婴、血液、性交等方式传播。
问下有肝癌的人到了晚期老实吐血他的最后一口气传染吗	肝癌疾病本身并不具备传染性。传染必须具备三个条件：传染源、传播途径及易感染人群。首先癌细胞并不是传染源，它只能在患者的体内进行扩散，不能自发对患者以外的人体进行传染，因此，能够形成传染的第一条途径就已经不完整了，故传染无法形成。因此，与肝癌患者进行日常接触如共同用餐、拥抱等不会造成传染。肝癌也不会通过空气、唾液、腹水及性生活传染其他人。同理，肝硬化也不会感染他人。平时肝脏疾病方面所说的传染是指病毒性肝炎的传染，多指乙肝及丙肝。如乙型肝炎可以通过母婴、血液、性交等方式传播。
肝癌扩散到肺部会传染吗	肝癌疾病本身并不具备传染性。传染必须具备三个条件：传染源、传播途径及易感染人群。首先癌细胞并不是传染源，它只能在患者的体内进行扩散，不能自发对患者以外的人体进行传染，因此，能够形成传染的第一条途径就已经不完整了，故传染无法形成。因此，与肝癌患者进行日常接触如共同用餐、拥抱等不会造成传染。肝癌也不会通过空气、唾液、腹水及性生活传染其他人。同理，肝硬化也不会感染他人。平时肝脏疾病方面所说的传染是指病毒性肝炎的传染，多指乙肝及丙肝。如乙型肝炎可以通过母婴、血液、性交等方式传播。
肝癌会不会传染给家人？	肝癌疾病本身并不具备传染性。传染必须具备三个条件：传染源、传播途径及易感染人群。首先癌细胞并不是传染源，它只能在患者的体内进行扩散，不能自发对患者以外的人体进行传染，因此，能够形成传染的第一条途径就已经不完整了，故传染无法形成。因此，与肝癌患者进行日常接触如共同用餐、拥抱等不会造成传染。肝癌也不会通过空气、唾液、腹水及性生活传染其他人。同理，肝硬化也不会感染他人。平时肝脏疾病方面所说的传染是指病毒性肝炎的传染，多指乙肝及丙肝。如乙型肝炎可以通过母婴、血液、性交等方式传播。
肝癌会通过唾液传染吗	肝癌疾病本身并不具备传染性。传染必须具备三个条件：传染源、传播途径及易感染人群。首先癌细胞并不是传染源，它只能在患者的体内进行扩散，不能自发对患者以外的人体进行传染，因此，能够形成传染的第一条途径就已经不完整了，故传染无法形成。因此，与肝癌患者进行日常接触如共同用餐、拥抱等不会造成传染。肝癌也不会通过空气、唾液、腹水及性生活传染其他人。同理，肝硬化也不会感染他人。平时肝脏疾病方面所说的传染是指病毒性肝炎的传染，多指乙肝及丙肝。如乙型肝炎可以通过母婴、血液、性交等方式传播。
肝癌会通过吐液传染吗？	肝癌疾病本身并不具备传染性。传染必须具备三个条件：传染源、传播途径及易感染人群。首先癌细胞并不是传染源，它只能在患者的体内进行扩散，不能自发对患者以外的人体进行传染，因此，能够形成传染的第一条途径就已经不完整了，故传染无法形成。因此，与肝癌患者进行日常接触如共同用餐、拥抱等不会造成传染。肝癌也不会通过空气、唾液、腹水及性生活传染其他人。同理，肝硬化也不会感染他人。平时肝脏疾病方面所说的传染是指病毒性肝炎的传染，多指乙肝及丙肝。如乙型肝炎可以通过母婴、血液、性交等方式传播。
肝癌晚期人快要死了，会传染人吗	肝癌疾病本身并不具备传染性。传染必须具备三个条件：传染源、传播途径及易感染人群。首先癌细胞并不是传染源，它只能在患者的体内进行扩散，不能自发对患者以外的人体进行传染，因此，能够形成传染的第一条途径就已经不完整了，故传染无法形成。因此，与肝癌患者进行日常接触如共同用餐、拥抱等不会造成传染。肝癌也不会通过空气、唾液、腹水及性生活传染其他人。同理，肝硬化也不会感染他人。平时肝脏疾病方面所说的传染是指病毒性肝炎的传染，多指乙肝及丙肝。如乙型肝炎可以通过母婴、血液、性交等方式传播。
得了肝癌的人会传染给其他人吗	肝癌疾病本身并不具备传染性。传染必须具备三个条件：传染源、传播途径及易感染人群。首先癌细胞并不是传染源，它只能在患者的体内进行扩散，不能自发对患者以外的人体进行传染，因此，能够形成传染的第一条途径就已经不完整了，故传染无法形成。因此，与肝癌患者进行日常接触如共同用餐、拥抱等不会造成传染。肝癌也不会通过空气、唾液、腹水及性生活传染其他人。同理，肝硬化也不会感染他人。平时肝脏疾病方面所说的传染是指病毒性肝炎的传染，多指乙肝及丙肝。如乙型肝炎可以通过母婴、血液、性交等方式传播。
家里长辈从乙肝转为肝癌已4年还传染吗？	肝癌疾病本身并不具备传染性。传染必须具备三个条件：传染源、传播途径及易感染人群。首先癌细胞并不是传染源，它只能在患者的体内进行扩散，不能自发对患者以外的人体进行传染，因此，能够形成传染的第一条途径就已经不完整了，故传染无法形成。因此，与肝癌患者进行日常接触如共同用餐、拥抱等不会造成传染。肝癌也不会通过空气、唾液、腹水及性生活传染其他人。同理，肝硬化也不会感染他人。平时肝脏疾病方面所说的传染是指病毒性肝炎的传染，多指乙肝及丙肝。如乙型肝炎可以通过母婴、血液、性交等方式传播。
跟有肝癌的人过性生活会传染吗？	肝癌疾病本身并不具备传染性。传染必须具备三个条件：传染源、传播途径及易感染人群。首先癌细胞并不是传染源，它只能在患者的体内进行扩散，不能自发对患者以外的人体进行传染，因此，能够形成传染的第一条途径就已经不完整了，故传染无法形成。因此，与肝癌患者进行日常接触如共同用餐、拥抱等不会造成传染。肝癌也不会通过空气、唾液、腹水及性生活传染其他人。同理，肝硬化也不会感染他人。平时肝脏疾病方面所说的传染是指病毒性肝炎的传染，多指乙肝及丙肝。如乙型肝炎可以通过母婴、血液、性交等方式传播。
肝癌会传染别人吗？	肝癌疾病本身并不具备传染性。传染必须具备三个条件：传染源、传播途径及易感染人群。首先癌细胞并不是传染源，它只能在患者的体内进行扩散，不能自发对患者以外的人体进行传染，因此，能够形成传染的第一条途径就已经不完整了，故传染无法形成。因此，与肝癌患者进行日常接触如共同用餐、拥抱等不会造成传染。肝癌也不会通过空气、唾液、腹水及性生活传染其他人。同理，肝硬化也不会感染他人。平时肝脏疾病方面所说的传染是指病毒性肝炎的传染，多指乙肝及丙肝。如乙型肝炎可以通过母婴、血液、性交等方式传播。
肝癌能传染人吗？	肝癌疾病本身并不具备传染性。传染必须具备三个条件：传染源、传播途径及易感染人群。首先癌细胞并不是传染源，它只能在患者的体内进行扩散，不能自发对患者以外的人体进行传染，因此，能够形成传染的第一条途径就已经不完整了，故传染无法形成。因此，与肝癌患者进行日常接触如共同用餐、拥抱等不会造成传染。肝癌也不会通过空气、唾液、腹水及性生活传染其他人。同理，肝硬化也不会感染他人。平时肝脏疾病方面所说的传染是指病毒性肝炎的传染，多指乙肝及丙肝。如乙型肝炎可以通过母婴、血液、性交等方式传播。
肝癌会传染给别人吗？	肝癌疾病本身并不具备传染性。传染必须具备三个条件：传染源、传播途径及易感染人群。首先癌细胞并不是传染源，它只能在患者的体内进行扩散，不能自发对患者以外的人体进行传染，因此，能够形成传染的第一条途径就已经不完整了，故传染无法形成。因此，与肝癌患者进行日常接触如共同用餐、拥抱等不会造成传染。肝癌也不会通过空气、唾液、腹水及性生活传染其他人。同理，肝硬化也不会感染他人。平时肝脏疾病方面所说的传染是指病毒性肝炎的传染，多指乙肝及丙肝。如乙型肝炎可以通过母婴、血液、性交等方式传播。
请问是肝炎引起的肝癌中期会传染吗？	肝癌疾病本身并不具备传染性。传染必须具备三个条件：传染源、传播途径及易感染人群。首先癌细胞并不是传染源，它只能在患者的体内进行扩散，不能自发对患者以外的人体进行传染，因此，能够形成传染的第一条途径就已经不完整了，故传染无法形成。因此，与肝癌患者进行日常接触如共同用餐、拥抱等不会造成传染。肝癌也不会通过空气、唾液、腹水及性生活传染其他人。同理，肝硬化也不会感染他人。平时肝脏疾病方面所说的传染是指病毒性肝炎的传染，多指乙肝及丙肝。如乙型肝炎可以通过母婴、血液、性交等方式传播。
和肝癌患者接吻并发生性关系会传染吗？	肝癌疾病本身并不具备传染性。传染必须具备三个条件：传染源、传播途径及易感染人群。首先癌细胞并不是传染源，它只能在患者的体内进行扩散，不能自发对患者以外的人体进行传染，因此，能够形成传染的第一条途径就已经不完整了，故传染无法形成。因此，与肝癌患者进行日常接触如共同用餐、拥抱等不会造成传染。肝癌也不会通过空气、唾液、腹水及性生活传染其他人。同理，肝硬化也不会感染他人。平时肝脏疾病方面所说的传染是指病毒性肝炎的传染，多指乙肝及丙肝。如乙型肝炎可以通过母婴、血液、性交等方式传播。
乙肝转肝癌会不会传染？	肝癌疾病本身并不具备传染性。传染必须具备三个条件：传染源、传播途径及易感染人群。首先癌细胞并不是传染源，它只能在患者的体内进行扩散，不能自发对患者以外的人体进行传染，因此，能够形成传染的第一条途径就已经不完整了，故传染无法形成。因此，与肝癌患者进行日常接触如共同用餐、拥抱等不会造成传染。肝癌也不会通过空气、唾液、腹水及性生活传染其他人。同理，肝硬化也不会感染他人。平时肝脏疾病方面所说的传染是指病毒性肝炎的传染，多指乙肝及丙肝。如乙型肝炎可以通过母婴、血液、性交等方式传播。
肝上有肿瘤传染吗？	肝癌疾病本身并不具备传染性。传染必须具备三个条件：传染源、传播途径及易感染人群。首先癌细胞并不是传染源，它只能在患者的体内进行扩散，不能自发对患者以外的人体进行传染，因此，能够形成传染的第一条途径就已经不完整了，故传染无法形成。因此，与肝癌患者进行日常接触如共同用餐、拥抱等不会造成传染。肝癌也不会通过空气、唾液、腹水及性生活传染其他人。同理，肝硬化也不会感染他人。平时肝脏疾病方面所说的传染是指病毒性肝炎的传染，多指乙肝及丙肝。如乙型肝炎可以通过母婴、血液、性交等方式传播。
肝癌有乙肝会传染人吗？	肝癌疾病本身并不具备传染性。传染必须具备三个条件：传染源、传播途径及易感染人群。首先癌细胞并不是传染源，它只能在患者的体内进行扩散，不能自发对患者以外的人体进行传染，因此，能够形成传染的第一条途径就已经不完整了，故传染无法形成。因此，与肝癌患者进行日常接触如共同用餐、拥抱等不会造成传染。肝癌也不会通过空气、唾液、腹水及性生活传染其他人。同理，肝硬化也不会感染他人。平时肝脏疾病方面所说的传染是指病毒性肝炎的传染，多指乙肝及丙肝。如乙型肝炎可以通过母婴、血液、性交等方式传播。
肝癌晚期死前会传染吗	肝癌疾病本身并不具备传染性。传染必须具备三个条件：传染源、传播途径及易感染人群。首先癌细胞并不是传染源，它只能在患者的体内进行扩散，不能自发对患者以外的人体进行传染，因此，能够形成传染的第一条途径就已经不完整了，故传染无法形成。因此，与肝癌患者进行日常接触如共同用餐、拥抱等不会造成传染。肝癌也不会通过空气、唾液、腹水及性生活传染其他人。同理，肝硬化也不会感染他人。平时肝脏疾病方面所说的传染是指病毒性肝炎的传染，多指乙肝及丙肝。如乙型肝炎可以通过母婴、血液、性交等方式传播。
乙肝变为肝癌还具有传染性吗？	肝癌疾病本身并不具备传染性。传染必须具备三个条件：传染源、传播途径及易感染人群。首先癌细胞并不是传染源，它只能在患者的体内进行扩散，不能自发对患者以外的人体进行传染，因此，能够形成传染的第一条途径就已经不完整了，故传染无法形成。因此，与肝癌患者进行日常接触如共同用餐、拥抱等不会造成传染。肝癌也不会通过空气、唾液、腹水及性生活传染其他人。同理，肝硬化也不会感染他人。平时肝脏疾病方面所说的传染是指病毒性肝炎的传染，多指乙肝及丙肝。如乙型肝炎可以通过母婴、血液、性交等方式传播。
原发性肝癌会进行传染吗	肝癌疾病本身并不具备传染性。传染必须具备三个条件：传染源、传播途径及易感染人群。首先癌细胞并不是传染源，它只能在患者的体内进行扩散，不能自发对患者以外的人体进行传染，因此，能够形成传染的第一条途径就已经不完整了，故传染无法形成。因此，与肝癌患者进行日常接触如共同用餐、拥抱等不会造成传染。肝癌也不会通过空气、唾液、腹水及性生活传染其他人。同理，肝硬化也不会感染他人。平时肝脏疾病方面所说的传染是指病毒性肝炎的传染，多指乙肝及丙肝。如乙型肝炎可以通过母婴、血液、性交等方式传播。
弥漫性肝癌晚期传染吗？	肝癌疾病本身并不具备传染性。传染必须具备三个条件：传染源、传播途径及易感染人群。首先癌细胞并不是传染源，它只能在患者的体内进行扩散，不能自发对患者以外的人体进行传染，因此，能够形成传染的第一条途径就已经不完整了，故传染无法形成。因此，与肝癌患者进行日常接触如共同用餐、拥抱等不会造成传染。肝癌也不会通过空气、唾液、腹水及性生活传染其他人。同理，肝硬化也不会感染他人。平时肝脏疾病方面所说的传染是指病毒性肝炎的传染，多指乙肝及丙肝。如乙型肝炎可以通过母婴、血液、性交等方式传播。
肝癌病患者可以探视吗？会不会通过空气传染？	肝癌疾病本身并不具备传染性。传染必须具备三个条件：传染源、传播途径及易感染人群。首先癌细胞并不是传染源，它只能在患者的体内进行扩散，不能自发对患者以外的人体进行传染，因此，能够形成传染的第一条途径就已经不完整了，故传染无法形成。因此，与肝癌患者进行日常接触如共同用餐、拥抱等不会造成传染。肝癌也不会通过空气、唾液、腹水及性生活传染其他人。同理，肝硬化也不会感染他人。平时肝脏疾病方面所说的传染是指病毒性肝炎的传染，多指乙肝及丙肝。如乙型肝炎可以通过母婴、血液、性交等方式传播。
原发性肝癌传染吗？	肝癌疾病本身并不具备传染性。传染必须具备三个条件：传染源、传播途径及易感染人群。首先癌细胞并不是传染源，它只能在患者的体内进行扩散，不能自发对患者以外的人体进行传染，因此，能够形成传染的第一条途径就已经不完整了，故传染无法形成。因此，与肝癌患者进行日常接触如共同用餐、拥抱等不会造成传染。肝癌也不会通过空气、唾液、腹水及性生活传染其他人。同理，肝硬化也不会感染他人。平时肝脏疾病方面所说的传染是指病毒性肝炎的传染，多指乙肝及丙肝。如乙型肝炎可以通过母婴、血液、性交等方式传播。
肝癌会传染吗？	肝癌疾病本身并不具备传染性。传染必须具备三个条件：传染源、传播途径及易感染人群。首先癌细胞并不是传染源，它只能在患者的体内进行扩散，不能自发对患者以外的人体进行传染，因此，能够形成传染的第一条途径就已经不完整了，故传染无法形成。因此，与肝癌患者进行日常接触如共同用餐、拥抱等不会造成传染。肝癌也不会通过空气、唾液、腹水及性生活传染其他人。同理，肝硬化也不会感染他人。平时肝脏疾病方面所说的传染是指病毒性肝炎的传染，多指乙肝及丙肝。如乙型肝炎可以通过母婴、血液、性交等方式传播。
继发性肝癌传染吗？	肝癌疾病本身并不具备传染性。传染必须具备三个条件：传染源、传播途径及易感染人群。首先癌细胞并不是传染源，它只能在患者的体内进行扩散，不能自发对患者以外的人体进行传染，因此，能够形成传染的第一条途径就已经不完整了，故传染无法形成。因此，与肝癌患者进行日常接触如共同用餐、拥抱等不会造成传染。肝癌也不会通过空气、唾液、腹水及性生活传染其他人。同理，肝硬化也不会感染他人。平时肝脏疾病方面所说的传染是指病毒性肝炎的传染，多指乙肝及丙肝。如乙型肝炎可以通过母婴、血液、性交等方式传播。
肝癌黄疸传染吗？	肝癌疾病本身并不具备传染性。传染必须具备三个条件：传染源、传播途径及易感染人群。首先癌细胞并不是传染源，它只能在患者的体内进行扩散，不能自发对患者以外的人体进行传染，因此，能够形成传染的第一条途径就已经不完整了，故传染无法形成。因此，与肝癌患者进行日常接触如共同用餐、拥抱等不会造成传染。肝癌也不会通过空气、唾液、腹水及性生活传染其他人。同理，肝硬化也不会感染他人。平时肝脏疾病方面所说的传染是指病毒性肝炎的传染，多指乙肝及丙肝。如乙型肝炎可以通过母婴、血液、性交等方式传播。
原发性肝癌传染吗？	肝癌疾病本身并不具备传染性。传染必须具备三个条件：传染源、传播途径及易感染人群。首先癌细胞并不是传染源，它只能在患者的体内进行扩散，不能自发对患者以外的人体进行传染，因此，能够形成传染的第一条途径就已经不完整了，故传染无法形成。因此，与肝癌患者进行日常接触如共同用餐、拥抱等不会造成传染。肝癌也不会通过空气、唾液、腹水及性生活传染其他人。同理，肝硬化也不会感染他人。平时肝脏疾病方面所说的传染是指病毒性肝炎的传染，多指乙肝及丙肝。如乙型肝炎可以通过母婴、血液、性交等方式传播。
我爸肝癌我是乙肝病毒携带者癌细胞扩散了还会传染我吗	肝癌疾病本身并不具备传染性。传染必须具备三个条件：传染源、传播途径及易感染人群。首先癌细胞并不是传染源，它只能在患者的体内进行扩散，不能自发对患者以外的人体进行传染，因此，能够形成传染的第一条途径就已经不完整了，故传染无法形成。因此，与肝癌患者进行日常接触如共同用餐、拥抱等不会造成传染。肝癌也不会通过空气、唾液、腹水及性生活传染其他人。同理，肝硬化也不会感染他人。平时肝脏疾病方面所说的传染是指病毒性肝炎的传染，多指乙肝及丙肝。如乙型肝炎可以通过母婴、血液、性交等方式传播。
乙肝引起的肝癌传染吗？	肝癌疾病本身并不具备传染性。传染必须具备三个条件：传染源、传播途径及易感染人群。首先癌细胞并不是传染源，它只能在患者的体内进行扩散，不能自发对患者以外的人体进行传染，因此，能够形成传染的第一条途径就已经不完整了，故传染无法形成。因此，与肝癌患者进行日常接触如共同用餐、拥抱等不会造成传染。肝癌也不会通过空气、唾液、腹水及性生活传染其他人。同理，肝硬化也不会感染他人。平时肝脏疾病方面所说的传染是指病毒性肝炎的传染，多指乙肝及丙肝。如乙型肝炎可以通过母婴、血液、性交等方式传播。
肝炎引起的肝癌会传染吗？	肝癌疾病本身并不具备传染性。传染必须具备三个条件：传染源、传播途径及易感染人群。首先癌细胞并不是传染源，它只能在患者的体内进行扩散，不能自发对患者以外的人体进行传染，因此，能够形成传染的第一条途径就已经不完整了，故传染无法形成。因此，与肝癌患者进行日常接触如共同用餐、拥抱等不会造成传染。肝癌也不会通过空气、唾液、腹水及性生活传染其他人。同理，肝硬化也不会感染他人。平时肝脏疾病方面所说的传染是指病毒性肝炎的传染，多指乙肝及丙肝。如乙型肝炎可以通过母婴、血液、性交等方式传播。
肝肿瘤会传染吗	肝癌疾病本身并不具备传染性。传染必须具备三个条件：传染源、传播途径及易感染人群。首先癌细胞并不是传染源，它只能在患者的体内进行扩散，不能自发对患者以外的人体进行传染，因此，能够形成传染的第一条途径就已经不完整了，故传染无法形成。因此，与肝癌患者进行日常接触如共同用餐、拥抱等不会造成传染。肝癌也不会通过空气、唾液、腹水及性生活传染其他人。同理，肝硬化也不会感染他人。平时肝脏疾病方面所说的传染是指病毒性肝炎的传染，多指乙肝及丙肝。如乙型肝炎可以通过母婴、血液、性交等方式传播。
肝癌晚期患者用过的餐具洗干净了，其他人用会传染吗？	肝癌疾病本身并不具备传染性。传染必须具备三个条件：传染源、传播途径及易感染人群。首先癌细胞并不是传染源，它只能在患者的体内进行扩散，不能自发对患者以外的人体进行传染，因此，能够形成传染的第一条途径就已经不完整了，故传染无法形成。因此，与肝癌患者进行日常接触如共同用餐、拥抱等不会造成传染。肝癌也不会通过空气、唾液、腹水及性生活传染其他人。同理，肝硬化也不会感染他人。平时肝脏疾病方面所说的传染是指病毒性肝炎的传染，多指乙肝及丙肝。如乙型肝炎可以通过母婴、血液、性交等方式传播。
肝癌的患者有传染性的么？	肝癌疾病本身并不具备传染性。传染必须具备三个条件：传染源、传播途径及易感染人群。首先癌细胞并不是传染源，它只能在患者的体内进行扩散，不能自发对患者以外的人体进行传染，因此，能够形成传染的第一条途径就已经不完整了，故传染无法形成。因此，与肝癌患者进行日常接触如共同用餐、拥抱等不会造成传染。肝癌也不会通过空气、唾液、腹水及性生活传染其他人。同理，肝硬化也不会感染他人。平时肝脏疾病方面所说的传染是指病毒性肝炎的传染，多指乙肝及丙肝。如乙型肝炎可以通过母婴、血液、性交等方式传播。
丈夫早期肝癌和妻子过了性生活妻子能被传染吗？	肝癌疾病本身并不具备传染性。传染必须具备三个条件：传染源、传播途径及易感染人群。首先癌细胞并不是传染源，它只能在患者的体内进行扩散，不能自发对患者以外的人体进行传染，因此，能够形成传染的第一条途径就已经不完整了，故传染无法形成。因此，与肝癌患者进行日常接触如共同用餐、拥抱等不会造成传染。肝癌也不会通过空气、唾液、腹水及性生活传染其他人。同理，肝硬化也不会感染他人。平时肝脏疾病方面所说的传染是指病毒性肝炎的传染，多指乙肝及丙肝。如乙型肝炎可以通过母婴、血液、性交等方式传播。
我老公是肝癌我会得肝癌吗，我们有性生活，会传染吗？	肝癌疾病本身并不具备传染性。传染必须具备三个条件：传染源、传播途径及易感染人群。首先癌细胞并不是传染源，它只能在患者的体内进行扩散，不能自发对患者以外的人体进行传染，因此，能够形成传染的第一条途径就已经不完整了，故传染无法形成。因此，与肝癌患者进行日常接触如共同用餐、拥抱等不会造成传染。肝癌也不会通过空气、唾液、腹水及性生活传染其他人。同理，肝硬化也不会感染他人。平时肝脏疾病方面所说的传染是指病毒性肝炎的传染，多指乙肝及丙肝。如乙型肝炎可以通过母婴、血液、性交等方式传播。
我公公得肝癌了，我家人会传染吗？好害怕	肝癌疾病本身并不具备传染性。传染必须具备三个条件：传染源、传播途径及易感染人群。首先癌细胞并不是传染源，它只能在患者的体内进行扩散，不能自发对患者以外的人体进行传染，因此，能够形成传染的第一条途径就已经不完整了，故传染无法形成。因此，与肝癌患者进行日常接触如共同用餐、拥抱等不会造成传染。肝癌也不会通过空气、唾液、腹水及性生活传染其他人。同理，肝硬化也不会感染他人。平时肝脏疾病方面所说的传染是指病毒性肝炎的传染，多指乙肝及丙肝。如乙型肝炎可以通过母婴、血液、性交等方式传播。
我老公是肝癌我会得肝癌吗，我们有性生活，会传染吗？	肝癌疾病本身并不具备传染性。传染必须具备三个条件：传染源、传播途径及易感染人群。首先癌细胞并不是传染源，它只能在患者的体内进行扩散，不能自发对患者以外的人体进行传染，因此，能够形成传染的第一条途径就已经不完整了，故传染无法形成。因此，与肝癌患者进行日常接触如共同用餐、拥抱等不会造成传染。肝癌也不会通过空气、唾液、腹水及性生活传染其他人。同理，肝硬化也不会感染他人。平时肝脏疾病方面所说的传染是指病毒性肝炎的传染，多指乙肝及丙肝。如乙型肝炎可以通过母婴、血液、性交等方式传播。
我老婆有肝硬化及原发性肝癌，和她有性生活会传染吗	肝癌疾病本身并不具备传染性。传染必须具备三个条件：传染源、传播途径及易感染人群。首先癌细胞并不是传染源，它只能在患者的体内进行扩散，不能自发对患者以外的人体进行传染，因此，能够形成传染的第一条途径就已经不完整了，故传染无法形成。因此，与肝癌患者进行日常接触如共同用餐、拥抱等不会造成传染。肝癌也不会通过空气、唾液、腹水及性生活传染其他人。同理，肝硬化也不会感染他人。平时肝脏疾病方面所说的传染是指病毒性肝炎的传染，多指乙肝及丙肝。如乙型肝炎可以通过母婴、血液、性交等方式传播。
我家有一肝癌病人，我们该注意什么？晚期会传染吗？	肝癌疾病本身并不具备传染性。传染必须具备三个条件：传染源、传播途径及易感染人群。首先癌细胞并不是传染源，它只能在患者的体内进行扩散，不能自发对患者以外的人体进行传染，因此，能够形成传染的第一条途径就已经不完整了，故传染无法形成。因此，与肝癌患者进行日常接触如共同用餐、拥抱等不会造成传染。肝癌也不会通过空气、唾液、腹水及性生活传染其他人。同理，肝硬化也不会感染他人。平时肝脏疾病方面所说的传染是指病毒性肝炎的传染，多指乙肝及丙肝。如乙型肝炎可以通过母婴、血液、性交等方式传播。
我老婆有肝硬化及原发性肝癌，和她有性生活会传染吗	肝癌疾病本身并不具备传染性。传染必须具备三个条件：传染源、传播途径及易感染人群。首先癌细胞并不是传染源，它只能在患者的体内进行扩散，不能自发对患者以外的人体进行传染，因此，能够形成传染的第一条途径就已经不完整了，故传染无法形成。因此，与肝癌患者进行日常接触如共同用餐、拥抱等不会造成传染。肝癌也不会通过空气、唾液、腹水及性生活传染其他人。同理，肝硬化也不会感染他人。平时肝脏疾病方面所说的传染是指病毒性肝炎的传染，多指乙肝及丙肝。如乙型肝炎可以通过母婴、血液、性交等方式传播。
肝癌并黄疸指数高会传染吗	肝癌疾病本身并不具备传染性，与胆红素指标高与不高无关。传染必须具备三个条件：传染源、传播途径及易感染人群。首先癌细胞并不是传染源，它只能在患者的体内进行扩散，不能自发对患者以外的人体进行传染，因此，能够形成传染的第一条途径就已经不完整了，故传染无法形成。因此，与肝癌患者进行日常接触如共同用餐、拥抱等不会造成传染。肝癌也不会通过空气、唾液、腹水及性生活传染其他人。同理，肝硬化也不会感染他人。平时肝脏疾病方面所说的传染是指病毒性肝炎的传染，多指乙肝及丙肝。如乙型肝炎可以通过母婴、血液、性交等方式传播。
肝癌晚期患者的血会传染吗？	肝癌不会通过血液接触传染。但由于肝癌患者多有乙肝或丙肝病史，如果有伤口接触到病人血液，可立即至正规医疗机构注射免疫球蛋白预防肝炎的传染（病人有肝炎的情况下），并于6周、3个月、6个月后抽血化验肝炎相关指标。
我想问一下肝癌患者最终吐的血会传染吗？	肝癌不会通过血液接触传染。但由于肝癌患者多有乙肝或丙肝病史，如果有伤口接触到病人血液，可立即至正规医疗机构注射免疫球蛋白预防肝炎的传染（病人有肝炎的情况下），并于6周、3个月、7个月后抽血化验肝炎相关指标。
肝癌血液会传染吗？	肝癌不会通过血液接触传染。但由于肝癌患者多有乙肝或丙肝病史，如果有伤口接触到病人血液，可立即至正规医疗机构注射免疫球蛋白预防肝炎的传染（病人有肝炎的情况下），并于6周、3个月、8个月后抽血化验肝炎相关指标。
我昨天不小心被肝癌病人拔掉的针头扎到手，会传染吗？	肝癌不会通过血液接触传染。但由于肝癌患者多有乙肝或丙肝病史，如果有伤口接触到病人血液，可立即至正规医疗机构注射免疫球蛋白预防肝炎的传染（病人有肝炎的情况下），并于6周、3个月、9个月后抽血化验肝炎相关指标。
父亲肝癌，会遗传女儿吗	肝癌不是遗传病，亲代得肝癌并不会遗传给子代。但肝癌与遗传有关，家族性很明显。原因可能是这些高癌症家族人群的某些遗传物质稳定性比较差， 当接触某些致癌物质后， 较容易发生突变而形成癌症，这种现象称为遗传易感性。也可能和乙肝的垂直传播有关。肝癌家族倾向无法改变，但有肝癌家族史者，可提前做好预防工作， 定期检查、规范治疗，阻止或延缓肝癌发生。
母亲肝癌会遗传女儿吗？	肝癌不是遗传病，亲代得肝癌并不会遗传给子代。但肝癌与遗传有关，家族性很明显。原因可能是这些高癌症家族人群的某些遗传物质稳定性比较差， 当接触某些致癌物质后， 较容易发生突变而形成癌症，这种现象称为遗传易感性。也可能和乙肝的垂直传播有关。肝癌家族倾向无法改变，但有肝癌家族史者，可提前做好预防工作， 定期检查、规范治疗，阻止或延缓肝癌发生。
父亲肝癌会遗传儿子吗?	肝癌不是遗传病，亲代得肝癌并不会遗传给子代。但肝癌与遗传有关，家族性很明显。原因可能是这些高癌症家族人群的某些遗传物质稳定性比较差， 当接触某些致癌物质后， 较容易发生突变而形成癌症，这种现象称为遗传易感性。也可能和乙肝的垂直传播有关。肝癌家族倾向无法改变，但有肝癌家族史者，可提前做好预防工作， 定期检查、规范治疗，阻止或延缓肝癌发生。
父亲有肝癌孩子会有吗?	肝癌不是遗传病，亲代得肝癌并不会遗传给子代。但肝癌与遗传有关，家族性很明显。原因可能是这些高癌症家族人群的某些遗传物质稳定性比较差， 当接触某些致癌物质后， 较容易发生突变而形成癌症，这种现象称为遗传易感性。也可能和乙肝的垂直传播有关。肝癌家族倾向无法改变，但有肝癌家族史者，可提前做好预防工作， 定期检查、规范治疗，阻止或延缓肝癌发生。
肝癌会不会遗传给下一代？	肝癌不是遗传病，亲代得肝癌并不会遗传给子代。但肝癌与遗传有关，家族性很明显。原因可能是这些高癌症家族人群的某些遗传物质稳定性比较差， 当接触某些致癌物质后， 较容易发生突变而形成癌症，这种现象称为遗传易感性。也可能和乙肝的垂直传播有关。肝癌家族倾向无法改变，但有肝癌家族史者，可提前做好预防工作， 定期检查、规范治疗，阻止或延缓肝癌发生。
肝癌的遗传概率	肝癌不是遗传病，亲代得肝癌并不会遗传给子代。但肝癌与遗传有关，家族性很明显。原因可能是这些高癌症家族人群的某些遗传物质稳定性比较差， 当接触某些致癌物质后， 较容易发生突变而形成癌症，这种现象称为遗传易感性。也可能和乙肝的垂直传播有关。肝癌家族倾向无法改变，但有肝癌家族史者，可提前做好预防工作， 定期检查、规范治疗，阻止或延缓肝癌发生。
一般肝癌会遗传吗？	肝癌不是遗传病，亲代得肝癌并不会遗传给子代。但肝癌与遗传有关，家族性很明显。原因可能是这些高癌症家族人群的某些遗传物质稳定性比较差， 当接触某些致癌物质后， 较容易发生突变而形成癌症，这种现象称为遗传易感性。也可能和乙肝的垂直传播有关。肝癌家族倾向无法改变，但有肝癌家族史者，可提前做好预防工作， 定期检查、规范治疗，阻止或延缓肝癌发生。
患上了肝癌病的患者可以过性生活的吗？	现无临床证据表明肝癌患者不可以进行性生活，也无明确指南提示术后多久可以开始性生活。但进行性生活应综合考虑患者的身体状况和精神状态，适当进行，且注意频率和活动量都不能过大。如果患者患有病毒性肝炎还应做好保护措施，减少配偶感染肝炎的概率。
肝癌手术后多久能过性生活?	现无临床证据表明肝癌患者不可以进行性生活，也无明确指南提示术后多久可以开始性生活。但进行性生活应综合考虑患者的身体状况和精神状态，适当进行，且注意频率和活动量都不能过大。如果患者患有病毒性肝炎还应做好保护措施，减少配偶感染肝炎的概率。
肝癌手术后彩超显示很好能同房吗？	现无临床证据表明肝癌患者不可以进行性生活，也无明确指南提示术后多久可以开始性生活。但进行性生活应综合考虑患者的身体状况和精神状态，适当进行，且注意频率和活动量都不能过大。如果患者患有病毒性肝炎还应做好保护措施，减少配偶感染肝炎的概率。
肝癌手术后多久能性生活？	现无临床证据表明肝癌患者不可以进行性生活，也无明确指南提示术后多久可以开始性生活。但进行性生活应综合考虑患者的身体状况和精神状态，适当进行，且注意频率和活动量都不能过大。如果患者患有病毒性肝炎还应做好保护措施，减少配偶感染肝炎的概率。
肝癌晚期患者可以接吻过性生活吗	现无临床证据表明肝癌患者不可以进行性生活，也无明确指南提示术后多久可以开始性生活。但进行性生活应综合考虑患者的身体状况和精神状态，适当进行，且注意频率和活动量都不能过大。如果患者患有病毒性肝炎还应做好保护措施，减少配偶感染肝炎的概率。
我是一个肝癌患者，可以过性生活吗	现无临床证据表明肝癌患者不可以进行性生活，也无明确指南提示术后多久可以开始性生活。但进行性生活应综合考虑患者的身体状况和精神状态，适当进行，且注意频率和活动量都不能过大。如果患者患有病毒性肝炎还应做好保护措施，减少配偶感染肝炎的概率。
我是一肝癌切除患者，恢复后能过性生活吗	现无临床证据表明肝癌患者不可以进行性生活，也无明确指南提示术后多久可以开始性生活。但进行性生活应综合考虑患者的身体状况和精神状态，适当进行，且注意频率和活动量都不能过大。如果患者患有病毒性肝炎还应做好保护措施，减少配偶感染肝炎的概率。
肝癌晚期病人适宜做汗蒸吗？	肝癌患者在日常生活中应注意：1、避免情绪波动，保持乐观的精神状态，应尽量避免或减少引起情绪波动的各种刺激活动；2、避免过度劳累：过度的脑力或体力劳动不仅可使肝癌患者机体的抵抗力降低，促使癌症的复发或转移，而且可加重肝功损害，导致病情恶化；3、戒除不良的生活方式或习惯：忌烟忌酒，不吃霉变的粮食，少吃腌制肉制品等；4、作息规律，适当活动，有能力者适当体育锻炼，营养饮食。根据自身的病情及身体情况适当做正常的日常活动，一般无明确禁忌，如乘坐汽车、高铁、飞机、泡脚、足疗、按摩、散步都可以。
得了肝癌能大量运动吗	肝癌患者在日常生活中应注意：1、避免情绪波动，保持乐观的精神状态，应尽量避免或减少引起情绪波动的各种刺激活动；2、避免过度劳累：过度的脑力或体力劳动不仅可使肝癌患者机体的抵抗力降低，促使癌症的复发或转移，而且可加重肝功损害，导致病情恶化；3、戒除不良的生活方式或习惯：忌烟忌酒，不吃霉变的粮食，少吃腌制肉制品等；5、作息规律，适当活动，有能力者适当体育锻炼，营养饮食。根据自身的病情及身体情况适当做正常的日常活动，一般无明确禁忌，如乘坐汽车、高铁、飞机、泡脚、足疗、按摩、散步都可以。
肝癌晚期患者可以坐足疗么	肝癌患者在日常生活中应注意：1、避免情绪波动，保持乐观的精神状态，应尽量避免或减少引起情绪波动的各种刺激活动；2、避免过度劳累：过度的脑力或体力劳动不仅可使肝癌患者机体的抵抗力降低，促使癌症的复发或转移，而且可加重肝功损害，导致病情恶化；3、戒除不良的生活方式或习惯：忌烟忌酒，不吃霉变的粮食，少吃腌制肉制品等；6、作息规律，适当活动，有能力者适当体育锻炼，营养饮食。根据自身的病情及身体情况适当做正常的日常活动，一般无明确禁忌，如乘坐汽车、高铁、飞机、泡脚、足疗、按摩、散步都可以。
肝癌患者可以吸烟吗？	肝癌患者在日常生活中应注意：1、避免情绪波动，保持乐观的精神状态，应尽量避免或减少引起情绪波动的各种刺激活动；2、避免过度劳累：过度的脑力或体力劳动不仅可使肝癌患者机体的抵抗力降低，促使癌症的复发或转移，而且可加重肝功损害，导致病情恶化；3、戒除不良的生活方式或习惯：忌烟忌酒，不吃霉变的粮食，少吃腌制肉制品等；7、作息规律，适当活动，有能力者适当体育锻炼，营养饮食。根据自身的病情及身体情况适当做正常的日常活动，一般无明确禁忌，如乘坐汽车、高铁、飞机、泡脚、足疗、按摩、散步都可以。
肝癌.可以抽烟吗？	肝癌患者在日常生活中应注意：1、避免情绪波动，保持乐观的精神状态，应尽量避免或减少引起情绪波动的各种刺激活动；2、避免过度劳累：过度的脑力或体力劳动不仅可使肝癌患者机体的抵抗力降低，促使癌症的复发或转移，而且可加重肝功损害，导致病情恶化；3、戒除不良的生活方式或习惯：忌烟忌酒，不吃霉变的粮食，少吃腌制肉制品等；8、作息规律，适当活动，有能力者适当体育锻炼，营养饮食。根据自身的病情及身体情况适当做正常的日常活动，一般无明确禁忌，如乘坐汽车、高铁、飞机、泡脚、足疗、按摩、散步都可以。
肝癌患者可以走动吗，散步可以吗？	肝癌患者在日常生活中应注意：1、避免情绪波动，保持乐观的精神状态，应尽量避免或减少引起情绪波动的各种刺激活动；2、避免过度劳累：过度的脑力或体力劳动不仅可使肝癌患者机体的抵抗力降低，促使癌症的复发或转移，而且可加重肝功损害，导致病情恶化；3、戒除不良的生活方式或习惯：忌烟忌酒，不吃霉变的粮食，少吃腌制肉制品等；9、作息规律，适当活动，有能力者适当体育锻炼，营养饮食。根据自身的病情及身体情况适当做正常的日常活动，一般无明确禁忌，如乘坐汽车、高铁、飞机、泡脚、足疗、按摩、散步都可以。
肝癌可以运动吗？	肝癌患者在日常生活中应注意：1、避免情绪波动，保持乐观的精神状态，应尽量避免或减少引起情绪波动的各种刺激活动；2、避免过度劳累：过度的脑力或体力劳动不仅可使肝癌患者机体的抵抗力降低，促使癌症的复发或转移，而且可加重肝功损害，导致病情恶化；3、戒除不良的生活方式或习惯：忌烟忌酒，不吃霉变的粮食，少吃腌制肉制品等；10、作息规律，适当活动，有能力者适当体育锻炼，营养饮食。根据自身的病情及身体情况适当做正常的日常活动，一般无明确禁忌，如乘坐汽车、高铁、飞机、泡脚、足疗、按摩、散步都可以。
肝癌可以按摩吗	肝癌患者在日常生活中应注意：1、避免情绪波动，保持乐观的精神状态，应尽量避免或减少引起情绪波动的各种刺激活动；2、避免过度劳累：过度的脑力或体力劳动不仅可使肝癌患者机体的抵抗力降低，促使癌症的复发或转移，而且可加重肝功损害，导致病情恶化；3、戒除不良的生活方式或习惯：忌烟忌酒，不吃霉变的粮食，少吃腌制肉制品等；11、作息规律，适当活动，有能力者适当体育锻炼，营养饮食。根据自身的病情及身体情况适当做正常的日常活动，一般无明确禁忌，如乘坐汽车、高铁、飞机、泡脚、足疗、按摩、散步都可以。
得了肝癌，是该静养还是多运动？	肝癌患者在日常生活中应注意：1、避免情绪波动，保持乐观的精神状态，应尽量避免或减少引起情绪波动的各种刺激活动；2、避免过度劳累：过度的脑力或体力劳动不仅可使肝癌患者机体的抵抗力降低，促使癌症的复发或转移，而且可加重肝功损害，导致病情恶化；3、戒除不良的生活方式或习惯：忌烟忌酒，不吃霉变的粮食，少吃腌制肉制品等；12、作息规律，适当活动，有能力者适当体育锻炼，营养饮食。根据自身的病情及身体情况适当做正常的日常活动，一般无明确禁忌，如乘坐汽车、高铁、飞机、泡脚、足疗、按摩、散步都可以。
我父亲是肝癌已经做了手术，术后怎么保养	肝癌患者在日常生活中应注意：1、避免情绪波动，保持乐观的精神状态，应尽量避免或减少引起情绪波动的各种刺激活动；2、避免过度劳累：过度的脑力或体力劳动不仅可使肝癌患者机体的抵抗力降低，促使癌症的复发或转移，而且可加重肝功损害，导致病情恶化；3、戒除不良的生活方式或习惯：忌烟忌酒，不吃霉变的粮食，少吃腌制肉制品等；13、作息规律，适当活动，有能力者适当体育锻炼，营养饮食。根据自身的病情及身体情况适当做正常的日常活动，一般无明确禁忌，如乘坐汽车、高铁、飞机、泡脚、足疗、按摩、散步都可以。
肝癌和抽烟有关吗	香烟已经被证明与多种癌症的发病有关，其中也包括肝癌。其机制可能与香烟中的有害物质进入到血液需要肝脏代谢，增加肝脏的负荷，同时损伤遗传物质的稳定性，增加遗传易感性有关，会导致肝癌的发病率增加。
得了肝癌晚期，心里难受怎么办。	患者在得知病情后存在低落难过的情绪是可以理解的，但应注意调节，尽量避免情绪严重波动，保持积极的精神状态。如自我调节困难，建议至正规医院心理科就诊，由心理科专科医生进行心理辅导。
得了肝癌和肝硬化的话，女人还会来例假吗？	目前无证据支持肝癌与肝硬化会直接对女性例假有明显影响。如例假规律突然被打乱，建议至正规医院妇产科就诊，排除妇科疾病及肝癌盆腔转移等其他原因的可能。
我想知道肝癌病人感冒了可以吃感冒药吗	感冒是上呼吸道感染性疾病，肝癌的患者出现感冒，和普通人感冒的处理原则及所服药物并无明显不同。但应注意患者抵抗力及肝脏代谢能力较差，故具体用药种类及剂量建议至正规医院呼吸内科门诊就诊。
肝癌挂号挂哪科	肝癌可以根据患者不同的病情相应选择外科或内科治疗方法，一般首选的方法是外科治疗。可以先选择正规医院外科就诊，医生会根据患者情况最后制定相应的外科或内科治疗计划。
肝癌看内科还是外科	肝癌可以根据患者不同的病情相应选择外科或内科治疗方法，一般首选的方法是外科治疗。可以先选择正规医院外科就诊，医生会根据患者情况最后制定相应的外科或内科治疗计划。
肝癌病人能吃龙眼吗？	肝癌患者在饮食方面应尽量避免发霉变质、油腻、煎炸、烟熏、腌制、辛辣刺激、过于坚硬易划伤消化道等食物的摄取，其他无明确的禁忌，日常食物均可食用。在饮食方面可注意以下几点：1、满足热量需求，均衡膳食：恶性肿瘤是消耗性疾病，热量充足可以减少体内蛋白质的消耗，均衡膳食可以补充营养，增强体质；2、多食低脂和富含蛋白质的食物如瘦肉、鱼、禽蛋、奶制品、豆制品。注意在肝癌晚期肝功能明显异常时，要控制蛋白质的摄入，以免过多进食蛋白质诱发肝性脑病；3、多食富含维生素和膳食纤维的食物，主要见于各种水果和新鲜蔬菜，可起到辅助抗肿瘤作用。4、中药方面的食物应咨询正规中医科医生在其指导下服用。合理均衡的饮食对改善患者的预后有益。具体细则建议就诊于正规医院营养科，制定合理的膳食方案。
肝癌患者可以吃鱼吗？	肝癌患者在饮食方面应尽量避免发霉变质、油腻、煎炸、烟熏、腌制、辛辣刺激、过于坚硬易划伤消化道等食物的摄取，其他无明确的禁忌，日常食物均可食用。在饮食方面可注意以下几点：1、满足热量需求，均衡膳食：恶性肿瘤是消耗性疾病，热量充足可以减少体内蛋白质的消耗，均衡膳食可以补充营养，增强体质；2、多食低脂和富含蛋白质的食物如瘦肉、鱼、禽蛋、奶制品、豆制品。注意在肝癌晚期肝功能明显异常时，要控制蛋白质的摄入，以免过多进食蛋白质诱发肝性脑病；3、多食富含维生素和膳食纤维的食物，主要见于各种水果和新鲜蔬菜，可起到辅助抗肿瘤作用。4、中药方面的食物应咨询正规中医科医生在其指导下服用。合理均衡的饮食对改善患者的预后有益。具体细则建议就诊于正规医院营养科，制定合理的膳食方案。
肝癌病人可以吃鸭血吗	肝癌患者在饮食方面应尽量避免发霉变质、油腻、煎炸、烟熏、腌制、辛辣刺激、过于坚硬易划伤消化道等食物的摄取，其他无明确的禁忌，日常食物均可食用。在饮食方面可注意以下几点：1、满足热量需求，均衡膳食：恶性肿瘤是消耗性疾病，热量充足可以减少体内蛋白质的消耗，均衡膳食可以补充营养，增强体质；2、多食低脂和富含蛋白质的食物如瘦肉、鱼、禽蛋、奶制品、豆制品。注意在肝癌晚期肝功能明显异常时，要控制蛋白质的摄入，以免过多进食蛋白质诱发肝性脑病；3、多食富含维生素和膳食纤维的食物，主要见于各种水果和新鲜蔬菜，可起到辅助抗肿瘤作用。4、中药方面的食物应咨询正规中医科医生在其指导下服用。合理均衡的饮食对改善患者的预后有益。具体细则建议就诊于正规医院营养科，制定合理的膳食方案。
肝癌病人能喝蜂蜜吗？	肝癌患者在饮食方面应尽量避免发霉变质、油腻、煎炸、烟熏、腌制、辛辣刺激、过于坚硬易划伤消化道等食物的摄取，其他无明确的禁忌，日常食物均可食用。在饮食方面可注意以下几点：1、满足热量需求，均衡膳食：恶性肿瘤是消耗性疾病，热量充足可以减少体内蛋白质的消耗，均衡膳食可以补充营养，增强体质；2、多食低脂和富含蛋白质的食物如瘦肉、鱼、禽蛋、奶制品、豆制品。注意在肝癌晚期肝功能明显异常时，要控制蛋白质的摄入，以免过多进食蛋白质诱发肝性脑病；3、多食富含维生素和膳食纤维的食物，主要见于各种水果和新鲜蔬菜，可起到辅助抗肿瘤作用。4、中药方面的食物应咨询正规中医科医生在其指导下服用。合理均衡的饮食对改善患者的预后有益。具体细则建议就诊于正规医院营养科，制定合理的膳食方案。
肝癌患者可以吃鸭肉吗？	肝癌患者在饮食方面应尽量避免发霉变质、油腻、煎炸、烟熏、腌制、辛辣刺激、过于坚硬易划伤消化道等食物的摄取，其他无明确的禁忌，日常食物均可食用。在饮食方面可注意以下几点：1、满足热量需求，均衡膳食：恶性肿瘤是消耗性疾病，热量充足可以减少体内蛋白质的消耗，均衡膳食可以补充营养，增强体质；2、多食低脂和富含蛋白质的食物如瘦肉、鱼、禽蛋、奶制品、豆制品。注意在肝癌晚期肝功能明显异常时，要控制蛋白质的摄入，以免过多进食蛋白质诱发肝性脑病；3、多食富含维生素和膳食纤维的食物，主要见于各种水果和新鲜蔬菜，可起到辅助抗肿瘤作用。4、中药方面的食物应咨询正规中医科医生在其指导下服用。合理均衡的饮食对改善患者的预后有益。具体细则建议就诊于正规医院营养科，制定合理的膳食方案。
肝癌病人能吃人参吗？	肝癌患者在饮食方面应尽量避免发霉变质、油腻、煎炸、烟熏、腌制、辛辣刺激、过于坚硬易划伤消化道等食物的摄取，其他无明确的禁忌，日常食物均可食用。在饮食方面可注意以下几点：1、满足热量需求，均衡膳食：恶性肿瘤是消耗性疾病，热量充足可以减少体内蛋白质的消耗，均衡膳食可以补充营养，增强体质；2、多食低脂和富含蛋白质的食物如瘦肉、鱼、禽蛋、奶制品、豆制品。注意在肝癌晚期肝功能明显异常时，要控制蛋白质的摄入，以免过多进食蛋白质诱发肝性脑病；3、多食富含维生素和膳食纤维的食物，主要见于各种水果和新鲜蔬菜，可起到辅助抗肿瘤作用。4、中药方面的食物应咨询正规中医科医生在其指导下服用。合理均衡的饮食对改善患者的预后有益。具体细则建议就诊于正规医院营养科，制定合理的膳食方案。
肝癌患者可以吃海带吗？	肝癌患者在饮食方面应尽量避免发霉变质、油腻、煎炸、烟熏、腌制、辛辣刺激、过于坚硬易划伤消化道等食物的摄取，其他无明确的禁忌，日常食物均可食用。在饮食方面可注意以下几点：1、满足热量需求，均衡膳食：恶性肿瘤是消耗性疾病，热量充足可以减少体内蛋白质的消耗，均衡膳食可以补充营养，增强体质；2、多食低脂和富含蛋白质的食物如瘦肉、鱼、禽蛋、奶制品、豆制品。注意在肝癌晚期肝功能明显异常时，要控制蛋白质的摄入，以免过多进食蛋白质诱发肝性脑病；3、多食富含维生素和膳食纤维的食物，主要见于各种水果和新鲜蔬菜，可起到辅助抗肿瘤作用。4、中药方面的食物应咨询正规中医科医生在其指导下服用。合理均衡的饮食对改善患者的预后有益。具体细则建议就诊于正规医院营养科，制定合理的膳食方案。
肝癌患者能吃虾吗？	肝癌患者在饮食方面应尽量避免发霉变质、油腻、煎炸、烟熏、腌制、辛辣刺激、过于坚硬易划伤消化道等食物的摄取，其他无明确的禁忌，日常食物均可食用。在饮食方面可注意以下几点：1、满足热量需求，均衡膳食：恶性肿瘤是消耗性疾病，热量充足可以减少体内蛋白质的消耗，均衡膳食可以补充营养，增强体质；2、多食低脂和富含蛋白质的食物如瘦肉、鱼、禽蛋、奶制品、豆制品。注意在肝癌晚期肝功能明显异常时，要控制蛋白质的摄入，以免过多进食蛋白质诱发肝性脑病；3、多食富含维生素和膳食纤维的食物，主要见于各种水果和新鲜蔬菜，可起到辅助抗肿瘤作用。4、中药方面的食物应咨询正规中医科医生在其指导下服用。合理均衡的饮食对改善患者的预后有益。具体细则建议就诊于正规医院营养科，制定合理的膳食方案。
肝癌患者能吃猪血豆腐吗	肝癌患者在饮食方面应尽量避免发霉变质、油腻、煎炸、烟熏、腌制、辛辣刺激、过于坚硬易划伤消化道等食物的摄取，其他无明确的禁忌，日常食物均可食用。在饮食方面可注意以下几点：1、满足热量需求，均衡膳食：恶性肿瘤是消耗性疾病，热量充足可以减少体内蛋白质的消耗，均衡膳食可以补充营养，增强体质；2、多食低脂和富含蛋白质的食物如瘦肉、鱼、禽蛋、奶制品、豆制品。注意在肝癌晚期肝功能明显异常时，要控制蛋白质的摄入，以免过多进食蛋白质诱发肝性脑病；3、多食富含维生素和膳食纤维的食物，主要见于各种水果和新鲜蔬菜，可起到辅助抗肿瘤作用。4、中药方面的食物应咨询正规中医科医生在其指导下服用。合理均衡的饮食对改善患者的预后有益。具体细则建议就诊于正规医院营养科，制定合理的膳食方案。
肝癌患者可以吃垂盆草吗？	肝癌患者在饮食方面应尽量避免发霉变质、油腻、煎炸、烟熏、腌制、辛辣刺激、过于坚硬易划伤消化道等食物的摄取，其他无明确的禁忌，日常食物均可食用。在饮食方面可注意以下几点：1、满足热量需求，均衡膳食：恶性肿瘤是消耗性疾病，热量充足可以减少体内蛋白质的消耗，均衡膳食可以补充营养，增强体质；2、多食低脂和富含蛋白质的食物如瘦肉、鱼、禽蛋、奶制品、豆制品。注意在肝癌晚期肝功能明显异常时，要控制蛋白质的摄入，以免过多进食蛋白质诱发肝性脑病；3、多食富含维生素和膳食纤维的食物，主要见于各种水果和新鲜蔬菜，可起到辅助抗肿瘤作用。4、中药方面的食物应咨询正规中医科医生在其指导下服用。合理均衡的饮食对改善患者的预后有益。具体细则建议就诊于正规医院营养科，制定合理的膳食方案。
肝癌病人可以喝乌鸡汤吗？	肝癌患者在饮食方面应尽量避免发霉变质、油腻、煎炸、烟熏、腌制、辛辣刺激、过于坚硬易划伤消化道等食物的摄取，其他无明确的禁忌，日常食物均可食用。在饮食方面可注意以下几点：1、满足热量需求，均衡膳食：恶性肿瘤是消耗性疾病，热量充足可以减少体内蛋白质的消耗，均衡膳食可以补充营养，增强体质；2、多食低脂和富含蛋白质的食物如瘦肉、鱼、禽蛋、奶制品、豆制品。注意在肝癌晚期肝功能明显异常时，要控制蛋白质的摄入，以免过多进食蛋白质诱发肝性脑病；3、多食富含维生素和膳食纤维的食物，主要见于各种水果和新鲜蔬菜，可起到辅助抗肿瘤作用。4、中药方面的食物应咨询正规中医科医生在其指导下服用。合理均衡的饮食对改善患者的预后有益。具体细则建议就诊于正规医院营养科，制定合理的膳食方案。
肝癌病人可以吃蛋白粉吗？	肝癌患者在饮食方面应尽量避免发霉变质、油腻、煎炸、烟熏、腌制、辛辣刺激、过于坚硬易划伤消化道等食物的摄取，其他无明确的禁忌，日常食物均可食用。在饮食方面可注意以下几点：1、满足热量需求，均衡膳食：恶性肿瘤是消耗性疾病，热量充足可以减少体内蛋白质的消耗，均衡膳食可以补充营养，增强体质；2、多食低脂和富含蛋白质的食物如瘦肉、鱼、禽蛋、奶制品、豆制品。注意在肝癌晚期肝功能明显异常时，要控制蛋白质的摄入，以免过多进食蛋白质诱发肝性脑病；3、多食富含维生素和膳食纤维的食物，主要见于各种水果和新鲜蔬菜，可起到辅助抗肿瘤作用。4、中药方面的食物应咨询正规中医科医生在其指导下服用。合理均衡的饮食对改善患者的预后有益。具体细则建议就诊于正规医院营养科，制定合理的膳食方案。
肝癌病人能吃燕窝吗？	肝癌患者在饮食方面应尽量避免发霉变质、油腻、煎炸、烟熏、腌制、辛辣刺激、过于坚硬易划伤消化道等食物的摄取，其他无明确的禁忌，日常食物均可食用。在饮食方面可注意以下几点：1、满足热量需求，均衡膳食：恶性肿瘤是消耗性疾病，热量充足可以减少体内蛋白质的消耗，均衡膳食可以补充营养，增强体质；2、多食低脂和富含蛋白质的食物如瘦肉、鱼、禽蛋、奶制品、豆制品。注意在肝癌晚期肝功能明显异常时，要控制蛋白质的摄入，以免过多进食蛋白质诱发肝性脑病；3、多食富含维生素和膳食纤维的食物，主要见于各种水果和新鲜蔬菜，可起到辅助抗肿瘤作用。4、中药方面的食物应咨询正规中医科医生在其指导下服用。合理均衡的饮食对改善患者的预后有益。具体细则建议就诊于正规医院营养科，制定合理的膳食方案。
肝癌患者能黄芪泡水吗？	肝癌患者在饮食方面应尽量避免发霉变质、油腻、煎炸、烟熏、腌制、辛辣刺激、过于坚硬易划伤消化道等食物的摄取，其他无明确的禁忌，日常食物均可食用。在饮食方面可注意以下几点：1、满足热量需求，均衡膳食：恶性肿瘤是消耗性疾病，热量充足可以减少体内蛋白质的消耗，均衡膳食可以补充营养，增强体质；2、多食低脂和富含蛋白质的食物如瘦肉、鱼、禽蛋、奶制品、豆制品。注意在肝癌晚期肝功能明显异常时，要控制蛋白质的摄入，以免过多进食蛋白质诱发肝性脑病；3、多食富含维生素和膳食纤维的食物，主要见于各种水果和新鲜蔬菜，可起到辅助抗肿瘤作用。4、中药方面的食物应咨询正规中医科医生在其指导下服用。合理均衡的饮食对改善患者的预后有益。具体细则建议就诊于正规医院营养科，制定合理的膳食方案。
肝癌患者能喝排骨汤吗？	肝癌患者在饮食方面应尽量避免发霉变质、油腻、煎炸、烟熏、腌制、辛辣刺激、过于坚硬易划伤消化道等食物的摄取，其他无明确的禁忌，日常食物均可食用。在饮食方面可注意以下几点：1、满足热量需求，均衡膳食：恶性肿瘤是消耗性疾病，热量充足可以减少体内蛋白质的消耗，均衡膳食可以补充营养，增强体质；2、多食低脂和富含蛋白质的食物如瘦肉、鱼、禽蛋、奶制品、豆制品。注意在肝癌晚期肝功能明显异常时，要控制蛋白质的摄入，以免过多进食蛋白质诱发肝性脑病；3、多食富含维生素和膳食纤维的食物，主要见于各种水果和新鲜蔬菜，可起到辅助抗肿瘤作用。4、中药方面的食物应咨询正规中医科医生在其指导下服用。合理均衡的饮食对改善患者的预后有益。具体细则建议就诊于正规医院营养科，制定合理的膳食方案。
肝癌患者不能吃公鸡吗？	肝癌患者在饮食方面应尽量避免发霉变质、油腻、煎炸、烟熏、腌制、辛辣刺激、过于坚硬易划伤消化道等食物的摄取，其他无明确的禁忌，日常食物均可食用。在饮食方面可注意以下几点：1、满足热量需求，均衡膳食：恶性肿瘤是消耗性疾病，热量充足可以减少体内蛋白质的消耗，均衡膳食可以补充营养，增强体质；2、多食低脂和富含蛋白质的食物如瘦肉、鱼、禽蛋、奶制品、豆制品。注意在肝癌晚期肝功能明显异常时，要控制蛋白质的摄入，以免过多进食蛋白质诱发肝性脑病；3、多食富含维生素和膳食纤维的食物，主要见于各种水果和新鲜蔬菜，可起到辅助抗肿瘤作用。4、中药方面的食物应咨询正规中医科医生在其指导下服用。合理均衡的饮食对改善患者的预后有益。具体细则建议就诊于正规医院营养科，制定合理的膳食方案。
[truncated: 4,147 more rows]

## Sheet: 类别
编码	问题类别	答案解读
1	疾病解读	解答
2	检验解读	解答
3	检查解读	解答
4	鉴别诊断	解答
5	外科治疗	解答
6	介入治疗	解答
7	药物治疗	解答
8	中药治疗	解答
9	并发症处理	解答
10	费用	解答
11	生存时间	解答
12	传染	解答
13	日常饮食	解答
