# Supplementary material for: Double-target self-supervised clustering with multi-feature fusion for medical question texts
Source: PeerJ Comput Sci. 2024 Jun 28;10:e2075. doi: 10.7717/peerj-cs.2075 (PMC11637006; doi:10.7717/peerj-cs.2075)
Supplement: Supplemental Information 2 [file peerj-cs-10-2075-s002.xlsx]

## Sheet: Delete 4276 entries in the cate
question	answer
Symptoms of liver cancer metastasis to the intestine?	In addition to the symptoms of the primary disease, the appearance, nature and severity of intestinal symptoms depend on the size, number and location of the metastatic lesions. The symptoms are not typical, and the main manifestations may include: abdominal pain, abdominal distension, melena, emaciation, fatigue, anemia, gastrointestinal obstruction and other symptoms.
Symptoms of liver cancer metastasis to the brain?	In addition to the symptoms of the primary disease, the occurrence and severity of brain symptoms depend on the progression of the disease. The main manifestations may include: 1. Localization symptoms: related to the functional areas damaged by the metastatic tumor, such as sensory disturbance, loss of orientation and position discrimination, visual hallucinations, hemianopsia, inability to figu…
Symptoms of liver cancer metastasis to the lung	In addition to the symptoms of the primary disease, the occurrence and severity of pulmonary symptoms depend on the progression of the disease. The main manifestations may include: cough and hemoptysis, dyspnea, bloody pleural effusion, chest pain and other symptoms.
What is the meaning of liver cancer metastasis?	Liver cancer metastasis is the metastasis of malignant tumors of the liver to other parts of the liver or distant organs through various ways such as hematogenous metastasis, lymphatic metastasis, implantation metastasis, direct invasion, and so on. The metastasis of liver cancer can be divided into intrahepatic metastasis and extrahepatic metastasis. Because there are many abundant sinusoids in …
What is the most common mode of metastasis of primary liver cancer?	Hematogenous metastasis is the most common mode of liver cancer metastasis. The first is intrahepatic metastasis, such as the formation of portal vein tumor thrombus, which is characterized by substantial tumor thrombus in the ipsilateral portal vein branch, and some of the tumor thrombus can grow along the portal vein to the main trunk of the portal vein. Intrahepatic metastasis can be manifeste…
Can liver cancer metastasize to adrenal gland still do liver metastasis	At present, liver transplantation is not considered for liver cancer with distant metastasis in clinical practice, and other treatment options such as radiotherapy, chemotherapy, and intervention can be considered. The specific treatment plan should be treated in a regular hospital, and the specific treatment plan should be determined after multidisciplinary consultation with hepatobiliary surger…
How to determine whether liver cancer has metastasis?	The metastasis of liver cancer can be divided into intrahepatic metastasis and extrahepatic metastasis. Most patients with liver cancer have intrahepatic metastasis in the early stage. Extrahepatic metastasis is more common in the late stage of liver cancer. It is caused by cancer cells invading the hepatic vein, entering the systemic circulation, infiltrating and seeding and other ways to metast…
Does primary liver cancer metastasize?	Liver cancer metastasis is the metastasis of malignant tumors of the liver to other parts of the liver or distant organs through various means such as hematogenous metastasis, lymphatic metastasis, implantation metastasis, direct invasion, and so on. Liver cancer metastasis can be divided into intrahepatic metastasis and extrahepatic metastasis. Because there are many abundant sinusoids in the li…
Will primary liver cancer spread?	Liver cancer metastasis is the metastasis of malignant tumors of the liver to other parts of the liver or distant organs through various means such as hematogenous metastasis, lymphatic metastasis, implantation metastasis, direct invasion, and so on. Liver cancer metastasis can be divided into intrahepatic metastasis and extrahepatic metastasis. Because there are many abundant sinusoids in the li…
Liver cancer metastasize to the bone how to do?	Bone metastasis of liver cancer is usually late, and most patients have multiple bone destruction. At present, on the basis of active control of the primary tumor, surgery, interventional therapy, radiotherapy, bisphosphonate drug therapy, pain treatment and other methods can be used for bone metastases. It is recommended to seek medical advice from regular medical institutions, and the treatment…
Is there any cure for bone metastasis of liver cancer?	Bone metastasis of liver cancer is usually late, and most patients have multiple bone destruction. At present, on the basis of active control of the primary tumor, surgery, interventional therapy, radiotherapy, bisphosphonate drug therapy, pain treatment and other methods can be used for bone metastases. It is recommended to seek medical advice from regular medical institutions, and the treatment…
How is liver cancer metastatic peritoneal cavity treated?	Liver cancer with peritoneal implantation metastasis is late, and generally there is no indication for surgery. Radiotherapy and chemotherapy are usually adopted. It is recommended to consult the medical oncology department of a regular hospital and determine the treatment plan according to the comprehensive condition of the patient.
Treatment of metastatic lymph nodes in liver cancer	Hepatocellular carcinoma with lymph node metastasis is a late disease with poor prognosis. At present, surgical treatment, interventional therapy, radiotherapy and chemotherapy can be selected according to the patient's comprehensive condition. Among them, surgical resection should pay attention to the exploration and dissection of lymph nodes. It is recommended that regular medical institutions …
What about lymph node metastasis of liver cancer?	Hepatocellular carcinoma with lymph node metastasis is a late disease with poor prognosis. At present, surgical treatment, interventional therapy, radiotherapy and chemotherapy can be selected according to the patient's comprehensive condition. Among them, surgical resection should pay attention to the exploration and dissection of lymph nodes. It is recommended that regular medical institutions …
How is lymph node metastasis of liver cancer treated	Hepatocellular carcinoma with lymph node metastasis is a late disease with poor prognosis. At present, surgical treatment, interventional therapy, radiotherapy and chemotherapy can be selected according to the patient's comprehensive condition. Among them, surgical resection should pay attention to the exploration and dissection of lymph nodes. It is recommended that regular medical institutions …
How is liver cancer liver metastasis treated?	Liver cancer is the earliest metastasis in the liver, which is easy to invade the portal vein and its branches and form tumor thrombus. After abscission, multiple metastases can be caused in the liver. The preferred treatment method is surgical resection, and the surgical method can be determined according to the size, number and distribution of metastatic lesions. In the absence of surgical indi…
What about intrahepatic metastasis of liver cancer?	Liver cancer is the earliest metastasis in the liver, which is easy to invade the portal vein and its branches and form tumor thrombus. After abscission, multiple metastases can be caused in the liver. The preferred treatment method is surgical resection, and the surgical method can be determined according to the size, number and distribution of metastatic lesions. In the absence of surgical indi…
How should intrahepatic metastasis be done after liver cancer surgery?	Liver cancer is the earliest metastasis in the liver, which is easy to invade the portal vein and its branches and form tumor thrombus. After abscission, multiple metastases can be caused in the liver. The preferred treatment method is surgical resection, and the surgical method can be determined according to the size, number and distribution of metastatic lesions. In the absence of surgical indi…
Dad liver cancer has been transferred to the lungs how to do?	Most patients with lung metastasis of liver cancer are at an advanced stage. At present, it is generally advocated that under the premise of actively controlling intrahepatic lesions and strictly grasping the indications of various treatment techniques, the treatment plan should be selected according to the patient's ECOG score, Child-Pugh classification, and the location, size, number, and vascu…
What to do after lung metastasis of liver cancer?	Most patients with lung metastasis of liver cancer are at an advanced stage. At present, it is generally advocated that under the premise of actively controlling intrahepatic lesions and strictly grasping the indications of various treatment techniques, the treatment plan should be selected according to the patient's ECOG score, Child-Pugh classification, and the location, size, number, and vascu…
Liver cancer metastasis to the lung has 1 cm shadow can do surgery	Most patients with lung metastasis of liver cancer are at an advanced stage. At present, it is generally advocated that under the premise of actively controlling intrahepatic lesions and strictly grasping the indications of various treatment techniques, the treatment plan should be selected according to the patient's ECOG score, Child-Pugh classification, and the location, size, number, and vascu…
Can liver cancer metastasis to the lung be treated?	Most patients with lung metastasis of liver cancer are at an advanced stage. At present, it is generally advocated that under the premise of actively controlling intrahepatic lesions and strictly grasping the indications of various treatment techniques, the treatment plan should be selected according to the patient's ECOG score, Child-Pugh classification, and the location, size, number, and vascu…
How is lung metastasis of liver cancer treated	Most patients with lung metastasis of liver cancer are at an advanced stage. At present, it is generally advocated that under the premise of actively controlling intrahepatic lesions and strictly grasping the indications of various treatment techniques, the treatment plan should be selected according to the patient's ECOG score, Child-Pugh classification, and the location, size, number, and vascu…
How is liver cancer brain metastasis treated?	Most patients with brain metastases from liver cancer are in the advanced stage, and the treatment of brain metastases from advanced liver cancer is quite difficult. Currently, it is advocated that surgery or radiotherapy and chemotherapy should be selected under the premise of active control of intrahepatic lesions and strict control of the indications of various treatment techniques. It is reco…
Can portal vein tumor thrombus be controlled?	Surgical resection is the first choice and potentially curative method for patients with hepatocellular carcinoma with portal vein tumor thrombus. However, most patients have lost the opportunity for surgery when they are found, and the postoperative recurrence rate is high. At present, the non-surgical treatment mainly includes TACE, hepatic arterial infusion chemotherapy, radiotherapy, regional…
What targeted drugs should liver cancer lung metastasis take?	Most of the patients with lung metastasis of liver cancer are at an advanced stage. At present, the main molecular targeted drugs used in the clinical treatment of liver cancer are sorafenib, which is an oral multi-enzyme inhibitor that inhibits the proliferation of tumor cells by selectively acting on RAF kinase. In addition to sorafenib, a series of new targeted drugs are being investigated in …
Eat the saliva of liver cancer patient can infect liver cancer?	Liver cancer itself is not contagious. Three conditions must be met for infection: source of infection, route of transmission and susceptible population. First of all, cancer cells are not the source of infection, it can only spread in the body of the patient, can not spontaneously infect the human body outside the patient, therefore, can form the first way of infection has been incomplete, so th…
Is the whole body yellow with advanced liver cancer infectious?	Liver cancer itself is not contagious. Three conditions must be met for infection: source of infection, route of transmission and susceptible population. First of all, cancer cells are not the source of infection, it can only spread in the body of the patient, can not spontaneously infect the human body outside the patient, therefore, can form the first way of infection has been incomplete, so th…
Liver cancer lung infection can be transmitted to the family?	Liver cancer itself is not contagious. Three conditions must be met for infection: source of infection, route of transmission and susceptible population. First of all, cancer cells are not the source of infection, it can only spread in the body of the patient, can not spontaneously infect the human body outside the patient, therefore, can form the first way of infection has been incomplete, so th…
Will advanced liver cancer be contagious in the air?	Liver cancer itself is not contagious. Three conditions must be met for infection: source of infection, route of transmission and susceptible population. First of all, cancer cells are not the source of infection, it can only spread in the body of the patient, can not spontaneously infect the human body outside the patient, therefore, can form the first way of infection has been incomplete, so th…
Will caring for advanced liver cancer be contagious?	Liver cancer itself is not contagious. Three conditions must be met for infection: source of infection, route of transmission and susceptible population. First of all, cancer cells are not the source of infection, it can only spread in the body of the patient, can not spontaneously infect the human body outside the patient, therefore, can form the first way of infection has been incomplete, so th…
Can second liver cancer of late stage infect?	Liver cancer itself is not contagious. Three conditions must be met for infection: source of infection, route of transmission and susceptible population. First of all, cancer cells are not the source of infection, it can only spread in the body of the patient, can not spontaneously infect the human body outside the patient, therefore, can form the first way of infection has been incomplete, so th…
Can contact liver cancer ascites infect?	Liver cancer itself is not contagious. Three conditions must be met for infection: source of infection, route of transmission and susceptible population. First of all, cancer cells are not the source of infection, it can only spread in the body of the patient, can not spontaneously infect the human body outside the patient, therefore, can form the first way of infection has been incomplete, so th…
Is it contagious to eat with liver cancer patients?	Liver cancer itself is not contagious. Three conditions must be met for infection: source of infection, route of transmission and susceptible population. First of all, cancer cells are not the source of infection, it can only spread in the body of the patient, can not spontaneously infect the human body outside the patient, therefore, can form the first way of infection has been incomplete, so th…
Can you eat with liver cancer patients?	Liver cancer itself is not contagious. Three conditions must be met for infection: source of infection, route of transmission and susceptible population. First of all, cancer cells are not the source of infection, it can only spread in the body of the patient, can not spontaneously infect the human body outside the patient, therefore, can form the first way of infection has been incomplete, so th…
Because of the liver cancer that causes second liver cancer patient can infect?	Liver cancer itself is not contagious. Three conditions must be met for infection: source of infection, route of transmission and susceptible population. First of all, cancer cells are not the source of infection, it can only spread in the body of the patient, can not spontaneously infect the human body outside the patient, therefore, can form the first way of infection has been incomplete, so th…
Can my family get liver cancer share tableware to infect?	Liver cancer itself is not contagious. Three conditions must be met for infection: source of infection, route of transmission and susceptible population. First of all, cancer cells are not the source of infection, it can only spread in the body of the patient, can not spontaneously infect the human body outside the patient, therefore, can form the first way of infection has been incomplete, so th…
Home has liver cancer patient does not divide tableware to be able to infect?	Liver cancer itself is not contagious. Three conditions must be met for infection: source of infection, route of transmission and susceptible population. First of all, cancer cells are not the source of infection, it can only spread in the body of the patient, can not spontaneously infect the human body outside the patient, therefore, can form the first way of infection has been incomplete, so th…
There are patients with advanced liver cancer, accompanying family members are afraid of infection, accompanying family members should go to the hospital?	Liver cancer itself is not contagious. Three conditions must be met for infection: source of infection, route of transmission and susceptible population. First of all, cancer cells are not the source of infection, it can only spread in the body of the patient, can not spontaneously infect the human body outside the patient, therefore, can form the first way of infection has been incomplete, so th…
Does the late stage of lung cancer liver cancer have infectivity excuse me	Liver cancer itself is not contagious. Three conditions must be met for infection: source of infection, route of transmission and susceptible population. First of all, cancer cells are not the source of infection, it can only spread in the body of the patient, can not spontaneously infect the human body outside the patient, therefore, can form the first way of infection has been incomplete, so th…
Is liver cancer jaundice contagious?	Liver cancer itself is not contagious. Three conditions must be met for infection: source of infection, route of transmission and susceptible population. First of all, cancer cells are not the source of infection, it can only spread in the body of the patient, can not spontaneously infect the human body outside the patient, therefore, can form the first way of infection has been incomplete, so th…
Can liver cancer husband and wife infect?	Liver cancer itself is not contagious. Three conditions must be met for infection: source of infection, route of transmission and susceptible population. First of all, cancer cells are not the source of infection, it can only spread in the body of the patient, can not spontaneously infect the human body outside the patient, therefore, can form the first way of infection has been incomplete, so th…
Can liver cancer rupture be contagious?	Liver cancer itself is not contagious. Three conditions must be met for infection: source of infection, route of transmission and susceptible population. First of all, cancer cells are not the source of infection, it can only spread in the body of the patient, can not spontaneously infect the human body outside the patient, therefore, can form the first way of infection has been incomplete, so th…
Is advanced liver cancer ascites contagious	Liver cancer itself is not contagious. Three conditions must be met for infection: source of infection, route of transmission and susceptible population. First of all, cancer cells are not the source of infection, it can only spread in the body of the patient, can not spontaneously infect the human body outside the patient, therefore, can form the first way of infection has been incomplete, so th…
What way can late liver cancer infect	Liver cancer itself is not contagious. Three conditions must be met for infection: source of infection, route of transmission and susceptible population. First of all, cancer cells are not the source of infection, it can only spread in the body of the patient, can not spontaneously infect the human body outside the patient, therefore, can form the first way of infection has been incomplete, so th…
Can the saliva of liver cancer patient stick to my wound infect liver cancer?	Liver cancer itself is not contagious. Three conditions must be met for infection: source of infection, route of transmission and susceptible population. First of all, cancer cells are not the source of infection, it can only spread in the body of the patient, can not spontaneously infect the human body outside the patient, therefore, can form the first way of infection has been incomplete, so th…
What should pay attention to contact with liver cancer patients?	Liver cancer itself is not contagious. Three conditions must be met for infection: source of infection, route of transmission and susceptible population. First of all, cancer cells are not the source of infection, it can only spread in the body of the patient, can not spontaneously infect the human body outside the patient, therefore, can form the first way of infection has been incomplete, so th…
Will liver cancer be contagious when eating together	Liver cancer itself is not contagious. Three conditions must be met for infection: source of infection, route of transmission and susceptible population. First of all, cancer cells are not the source of infection, it can only spread in the body of the patient, can not spontaneously infect the human body outside the patient, therefore, can form the first way of infection has been incomplete, so th…
Grandpa is advanced liver cancer, and now it has been transferred to the lung, so will it be contagious?	Liver cancer itself is not contagious. Three conditions must be met for infection: source of infection, route of transmission and susceptible population. First of all, cancer cells are not the source of infection, it can only spread in the body of the patient, can not spontaneously infect the human body outside the patient, therefore, can form the first way of infection has been incomplete, so th…
It was hepatitis B before and now turned into liver cancer, will it infect	Liver cancer itself is not contagious. Three conditions must be met for infection: source of infection, route of transmission and susceptible population. First of all, cancer cells are not the source of infection, it can only spread in the body of the patient, can not spontaneously infect the human body outside the patient, therefore, can form the first way of infection has been incomplete, so th…
Ask the person that has liver cancer below to advanced honest hematemesis his last breath to infect	Liver cancer itself is not contagious. Three conditions must be met for infection: source of infection, route of transmission and susceptible population. First of all, cancer cells are not the source of infection, it can only spread in the body of the patient, can not spontaneously infect the human body outside the patient, therefore, can form the first way of infection has been incomplete, so th…
Liver cancer spread to the lungs can infect	Liver cancer itself is not contagious. Three conditions must be met for infection: source of infection, route of transmission and susceptible population. First of all, cancer cells are not the source of infection, it can only spread in the body of the patient, can not spontaneously infect the human body outside the patient, therefore, can form the first way of infection has been incomplete, so th…
Will liver cancer spread to family members?	Liver cancer itself is not contagious. Three conditions must be met for infection: source of infection, route of transmission and susceptible population. First of all, cancer cells are not the source of infection, it can only spread in the body of the patient, can not spontaneously infect the human body outside the patient, therefore, can form the first way of infection has been incomplete, so th…
Can liver cancer be transmitted through saliva	Liver cancer itself is not contagious. Three conditions must be met for infection: source of infection, route of transmission and susceptible population. First of all, cancer cells are not the source of infection, it can only spread in the body of the patient, can not spontaneously infect the human body outside the patient, therefore, can form the first way of infection has been incomplete, so th…
Can liver cancer be transmitted through spit?	Liver cancer itself is not contagious. Three conditions must be met for infection: source of infection, route of transmission and susceptible population. First of all, cancer cells are not the source of infection, it can only spread in the body of the patient, can not spontaneously infect the human body outside the patient, therefore, can form the first way of infection has been incomplete, so th…
Liver cancer late person is dying, can infect a person	Liver cancer itself is not contagious. Three conditions must be met for infection: source of infection, route of transmission and susceptible population. First of all, cancer cells are not the source of infection, it can only spread in the body of the patient, can not spontaneously infect the human body outside the patient, therefore, can form the first way of infection has been incomplete, so th…
Can the person who got liver cancer infect others	Liver cancer itself is not contagious. Three conditions must be met for infection: source of infection, route of transmission and susceptible population. First of all, cancer cells are not the source of infection, it can only spread in the body of the patient, can not spontaneously infect the human body outside the patient, therefore, can form the first way of infection has been incomplete, so th…
Is the elder in the family infected from hepatitis B to liver cancer for 4 years?	Liver cancer itself is not contagious. Three conditions must be met for infection: source of infection, route of transmission and susceptible population. First of all, cancer cells are not the source of infection, it can only spread in the body of the patient, can not spontaneously infect the human body outside the patient, therefore, can form the first way of infection has been incomplete, so th…
Can the person that has liver cancer lead a sexual life to infect?	Liver cancer itself is not contagious. Three conditions must be met for infection: source of infection, route of transmission and susceptible population. First of all, cancer cells are not the source of infection, it can only spread in the body of the patient, can not spontaneously infect the human body outside the patient, therefore, can form the first way of infection has been incomplete, so th…
Can liver cancer infect others?	Liver cancer itself is not contagious. Three conditions must be met for infection: source of infection, route of transmission and susceptible population. First of all, cancer cells are not the source of infection, it can only spread in the body of the patient, can not spontaneously infect the human body outside the patient, therefore, can form the first way of infection has been incomplete, so th…
Can liver cancer infect people?	Liver cancer itself is not contagious. Three conditions must be met for infection: source of infection, route of transmission and susceptible population. First of all, cancer cells are not the source of infection, it can only spread in the body of the patient, can not spontaneously infect the human body outside the patient, therefore, can form the first way of infection has been incomplete, so th…
Can liver cancer be transmitted to others?	Liver cancer itself is not contagious. Three conditions must be met for infection: source of infection, route of transmission and susceptible population. First of all, cancer cells are not the source of infection, it can only spread in the body of the patient, can not spontaneously infect the human body outside the patient, therefore, can form the first way of infection has been incomplete, so th…
Is the liver cancer that causes excuse me can infect in the middle period of hepatitis?	Liver cancer itself is not contagious. Three conditions must be met for infection: source of infection, route of transmission and susceptible population. First of all, cancer cells are not the source of infection, it can only spread in the body of the patient, can not spontaneously infect the human body outside the patient, therefore, can form the first way of infection has been incomplete, so th…
Can kiss with liver cancer patient and have sexual relations infect?	Liver cancer itself is not contagious. Three conditions must be met for infection: source of infection, route of transmission and susceptible population. First of all, cancer cells are not the source of infection, it can only spread in the body of the patient, can not spontaneously infect the human body outside the patient, therefore, can form the first way of infection has been incomplete, so th…
Can second liver turn liver cancer infect?	Liver cancer itself is not contagious. Three conditions must be met for infection: source of infection, route of transmission and susceptible population. First of all, cancer cells are not the source of infection, it can only spread in the body of the patient, can not spontaneously infect the human body outside the patient, therefore, can form the first way of infection has been incomplete, so th…
Is there tumor infection on liver?	Liver cancer itself is not contagious. Three conditions must be met for infection: source of infection, route of transmission and susceptible population. First of all, cancer cells are not the source of infection, it can only spread in the body of the patient, can not spontaneously infect the human body outside the patient, therefore, can form the first way of infection has been incomplete, so th…
Can liver cancer have second liver to infect a person?	Liver cancer itself is not contagious. Three conditions must be met for infection: source of infection, route of transmission and susceptible population. First of all, cancer cells are not the source of infection, it can only spread in the body of the patient, can not spontaneously infect the human body outside the patient, therefore, can form the first way of infection has been incomplete, so th…
Will liver cancer be contagious before death	Liver cancer itself is not contagious. Three conditions must be met for infection: source of infection, route of transmission and susceptible population. First of all, cancer cells are not the source of infection, it can only spread in the body of the patient, can not spontaneously infect the human body outside the patient, therefore, can form the first way of infection has been incomplete, so th…
Does second liver change liver cancer still have infectivity?	Liver cancer itself is not contagious. Three conditions must be met for infection: source of infection, route of transmission and susceptible population. First of all, cancer cells are not the source of infection, it can only spread in the body of the patient, can not spontaneously infect the human body outside the patient, therefore, can form the first way of infection has been incomplete, so th…
Can primary liver cancer be contagious	Liver cancer itself is not contagious. Three conditions must be met for infection: source of infection, route of transmission and susceptible population. First of all, cancer cells are not the source of infection, it can only spread in the body of the patient, can not spontaneously infect the human body outside the patient, therefore, can form the first way of infection has been incomplete, so th…
Is advanced diffuse liver cancer contagious?	Liver cancer itself is not contagious. Three conditions must be met for infection: source of infection, route of transmission and susceptible population. First of all, cancer cells are not the source of infection, it can only spread in the body of the patient, can not spontaneously infect the human body outside the patient, therefore, can form the first way of infection has been incomplete, so th…
Can patients with liver cancer be visited? Can it be transmitted through the air?	Liver cancer itself is not contagious. Three conditions must be met for infection: source of infection, route of transmission and susceptible population. First of all, cancer cells are not the source of infection, it can only spread in the body of the patient, can not spontaneously infect the human body outside the patient, therefore, can form the first way of infection has been incomplete, so th…
Is primary liver cancer contagious?	Liver cancer itself is not contagious. Three conditions must be met for infection: source of infection, route of transmission and susceptible population. First of all, cancer cells are not the source of infection, it can only spread in the body of the patient, can not spontaneously infect the human body outside the patient, therefore, can form the first way of infection has been incomplete, so th…
Is liver cancer contagious?	Liver cancer itself is not contagious. Three conditions must be met for infection: source of infection, route of transmission and susceptible population. First of all, cancer cells are not the source of infection, it can only spread in the body of the patient, can not spontaneously infect the human body outside the patient, therefore, can form the first way of infection has been incomplete, so th…
Is secondary liver cancer contagious?	Liver cancer itself is not contagious. Three conditions must be met for infection: source of infection, route of transmission and susceptible population. First of all, cancer cells are not the source of infection, it can only spread in the body of the patient, can not spontaneously infect the human body outside the patient, therefore, can form the first way of infection has been incomplete, so th…
Is liver cancer jaundice contagious?	Liver cancer itself is not contagious. Three conditions must be met for infection: source of infection, route of transmission and susceptible population. First of all, cancer cells are not the source of infection, it can only spread in the body of the patient, can not spontaneously infect the human body outside the patient, therefore, can form the first way of infection has been incomplete, so th…
Is primary liver cancer contagious?	Liver cancer itself is not contagious. Three conditions must be met for infection: source of infection, route of transmission and susceptible population. First of all, cancer cells are not the source of infection, it can only spread in the body of the patient, can not spontaneously infect the human body outside the patient, therefore, can form the first way of infection has been incomplete, so th…
My dad liver cancer I is the person that carries second liver virus cancer cell spread still can infect me	Liver cancer itself is not contagious. Three conditions must be met for infection: source of infection, route of transmission and susceptible population. First of all, cancer cells are not the source of infection, it can only spread in the body of the patient, can not spontaneously infect the human body outside the patient, therefore, can form the first way of infection has been incomplete, so th…
Is the liver cancer that second liver cancer causes infectious?	Liver cancer itself is not contagious. Three conditions must be met for infection: source of infection, route of transmission and susceptible population. First of all, cancer cells are not the source of infection, it can only spread in the body of the patient, can not spontaneously infect the human body outside the patient, therefore, can form the first way of infection has been incomplete, so th…
Can liver cancer caused by hepatitis infect?	Liver cancer itself is not contagious. Three conditions must be met for infection: source of infection, route of transmission and susceptible population. First of all, cancer cells are not the source of infection, it can only spread in the body of the patient, can not spontaneously infect the human body outside the patient, therefore, can form the first way of infection has been incomplete, so th…
Can liver tumor be contagious	Liver cancer itself is not contagious. Three conditions must be met for infection: source of infection, route of transmission and susceptible population. First of all, cancer cells are not the source of infection, it can only spread in the body of the patient, can not spontaneously infect the human body outside the patient, therefore, can form the first way of infection has been incomplete, so th…
The tableware used by patients with advanced liver cancer is washed clean, can others use it to infect?	Liver cancer itself is not contagious. Three conditions must be met for infection: source of infection, route of transmission and susceptible population. First of all, cancer cells are not the source of infection, it can only spread in the body of the patient, can not spontaneously infect the human body outside the patient, therefore, can form the first way of infection has been incomplete, so th…
Does the patient of liver cancer have infectivity?	Liver cancer itself is not contagious. Three conditions must be met for infection: source of infection, route of transmission and susceptible population. First of all, cancer cells are not the source of infection, it can only spread in the body of the patient, can not spontaneously infect the human body outside the patient, therefore, can form the first way of infection has been incomplete, so th…
Husband early liver cancer and wife had sexual life wife can be infected?	Liver cancer itself is not contagious. Three conditions must be met for infection: source of infection, route of transmission and susceptible population. First of all, cancer cells are not the source of infection, it can only spread in the body of the patient, can not spontaneously infect the human body outside the patient, therefore, can form the first way of infection has been incomplete, so th…
My husband is liver cancer I will get liver cancer, we have sex, will it be contagious?	Liver cancer itself is not contagious. Three conditions must be met for infection: source of infection, route of transmission and susceptible population. First of all, cancer cells are not the source of infection, it can only spread in the body of the patient, can not spontaneously infect the human body outside the patient, therefore, can form the first way of infection has been incomplete, so th…
My father-in-law has liver cancer, will my family be contagious? So scared	Liver cancer itself is not contagious. Three conditions must be met for infection: source of infection, route of transmission and susceptible population. First of all, cancer cells are not the source of infection, it can only spread in the body of the patient, can not spontaneously infect the human body outside the patient, therefore, can form the first way of infection has been incomplete, so th…
My husband is liver cancer I will get liver cancer, we have sex, will it be contagious?	Liver cancer itself is not contagious. Three conditions must be met for infection: source of infection, route of transmission and susceptible population. First of all, cancer cells are not the source of infection, it can only spread in the body of the patient, can not spontaneously infect the human body outside the patient, therefore, can form the first way of infection has been incomplete, so th…
My wife has liver cirrhosis and primary liver cancer. Can sex with her infect you	Liver cancer itself is not contagious. Three conditions must be met for infection: source of infection, route of transmission and susceptible population. First of all, cancer cells are not the source of infection, it can only spread in the body of the patient, can not spontaneously infect the human body outside the patient, therefore, can form the first way of infection has been incomplete, so th…
My family has a liver cancer patient, what should we pay attention to? Will the late stage infect?	Liver cancer itself is not contagious. Three conditions must be met for infection: source of infection, route of transmission and susceptible population. First of all, cancer cells are not the source of infection, it can only spread in the body of the patient, can not spontaneously infect the human body outside the patient, therefore, can form the first way of infection has been incomplete, so th…
My wife has liver cirrhosis and primary liver cancer. Can sex with her infect you	Liver cancer itself is not contagious. Three conditions must be met for infection: source of infection, route of transmission and susceptible population. First of all, cancer cells are not the source of infection, it can only spread in the body of the patient, can not spontaneously infect the human body outside the patient, therefore, can form the first way of infection has been incomplete, so th…
Liver cancer and jaundice index is high can infect	Liver cancer disease itself is not contagious, and has nothing to do with high bilirubin index and low bilirubin index. Three conditions must be met for infection: source of infection, route of transmission and susceptible population. First of all, cancer cells are not the source of infection, it can only spread in the body of the patient, can not spontaneously infect the human body outside the p…
Can the blood of the patient of liver cancer of advanced stage infect?	Liver cancer is not transmitted through blood contact. However, because patients with liver cancer have a history of hepatitis B or C, if there is a wound contact with the patient's blood, you can immediately go to the formal medical institutions to inject immunoglobulin to prevent the infection of hepatitis (in the case of hepatitis), and draw blood tests for hepatitis related indicators after 6…
I want to ask the blood that the patient of liver cancer vomits finally can infect?	Liver cancer is not transmitted through blood contact. However, because patients with liver cancer have a history of hepatitis B or C, if there is a wound contact with the patient's blood, you can immediately go to the formal medical institutions to inject immunoglobulin to prevent the infection of hepatitis (in the case of hepatitis), and draw blood tests for hepatitis related indicators after 6…
Can liver cancer blood be contagious?	Liver cancer is not transmitted through blood contact. However, because patients with liver cancer have a history of hepatitis B or C, if there is a wound contact with the patient's blood, you can immediately go to the formal medical institutions to inject immunoglobulin to prevent the infection of hepatitis (in the case of hepatitis), and draw blood tests for hepatitis related indicators after 6…
I was not careful yesterday by liver cancer patients to pull out of the needle to the hand, can infection?	Liver cancer is not transmitted through blood contact. However, because patients with liver cancer have a history of hepatitis B or C, if there is a wound contact with the patient's blood, you can immediately go to the formal medical institutions to inject immunoglobulin to prevent the infection of hepatitis (in the case of hepatitis), and draw blood tests for hepatitis related indicators after 6…
6. Father liver cancer, can inherit daughter	Liver cancer is not a genetic disease, and parental liver cancer will not be passed on to the offspring. However, liver cancer is related to heredity, and the familial nature is obvious. The reason may be that the stability of some genetic material in these high cancer families is relatively poor, and when exposed to certain carcinogenic substances, it is easier to mutate and form cancer, which i…
Mother liver cancer can inherit daughter?	Liver cancer is not a genetic disease, and parental liver cancer will not be passed on to the offspring. However, liver cancer is related to heredity, and the familial nature is obvious. The reason may be that the stability of some genetic material in these high cancer families is relatively poor, and when exposed to certain carcinogenic substances, it is easier to mutate and form cancer, which i…
Can father liver cancer be passed on to Son?	Liver cancer is not a genetic disease, and parental liver cancer will not be passed on to the offspring. However, liver cancer is related to heredity, and the familial nature is obvious. The reason may be that the stability of some genetic material in these high cancer families is relatively poor, and when exposed to certain carcinogenic substances, it is easier to mutate and form cancer, which i…
Can children have liver cancer if their father has it?	Liver cancer is not a genetic disease, and parental liver cancer will not be passed on to the offspring. However, liver cancer is related to heredity, and the familial nature is obvious. The reason may be that the stability of some genetic material in these high cancer families is relatively poor, and when exposed to certain carcinogenic substances, it is easier to mutate and form cancer, which i…
Can liver cancer be passed on to the next generation?	Liver cancer is not a genetic disease, and parental liver cancer will not be passed on to the offspring. However, liver cancer is related to heredity, and the familial nature is obvious. The reason may be that the stability of some genetic material in these high cancer families is relatively poor, and when exposed to certain carcinogenic substances, it is easier to mutate and form cancer, which i…
The probability of inheritance of liver cancer	Liver cancer is not a genetic disease, and parental liver cancer will not be passed on to the offspring. However, liver cancer is related to heredity, and the familial nature is obvious. The reason may be that the stability of some genetic material in these high cancer families is relatively poor, and when exposed to certain carcinogenic substances, it is easier to mutate and form cancer, which i…
Will liver cancer be inherited in general?	Liver cancer is not a genetic disease, and parental liver cancer will not be passed on to the offspring. However, liver cancer is related to heredity, and the familial nature is obvious. The reason may be that the stability of some genetic material in these high cancer families is relatively poor, and when exposed to certain carcinogenic substances, it is easier to mutate and form cancer, which i…
Can the patient who suffered from liver cancer disease lead a sexual life?	There is no clinical evidence that patients with liver cancer should not have sex, and there are no clear guidelines on how soon to begin sex after surgery. However, sexual life should be carried out properly with comprehensive consideration of the patient's physical and mental state, and attention should be paid to the frequency and amount of activity should not be too large. If the patient has …
How long can you have sex after liver cancer surgery?	There is no clinical evidence that patients with liver cancer should not have sex, and there are no clear guidelines on how soon to begin sex after surgery. However, sexual life should be carried out properly with comprehensive consideration of the patient's physical and mental state, and attention should be paid to the frequency and amount of activity should not be too large. If the patient has …
Can color ultrasound show very good after liver cancer surgery to have sex?	There is no clinical evidence that patients with liver cancer should not have sex, and there are no clear guidelines on how soon to begin sex after surgery. However, sexual life should be carried out properly with comprehensive consideration of the patient's physical and mental state, and attention should be paid to the frequency and amount of activity should not be too large. If the patient has …
How long can sexual life be achieved after liver cancer surgery?	There is no clinical evidence that patients with liver cancer should not have sex, and there are no clear guidelines on how soon to begin sex after surgery. However, sexual life should be carried out properly with comprehensive consideration of the patient's physical and mental state, and attention should be paid to the frequency and amount of activity should not be too large. If the patient has …
Can patients with advanced liver cancer kiss sexual life	There is no clinical evidence that patients with liver cancer should not have sex, and there are no clear guidelines on how soon to begin sex after surgery. However, sexual life should be carried out properly with comprehensive consideration of the patient's physical and mental state, and attention should be paid to the frequency and amount of activity should not be too large. If the patient has …
I am a liver cancer patient, can I have sex	There is no clinical evidence that patients with liver cancer should not have sex, and there are no clear guidelines on how soon to begin sex after surgery. However, sexual life should be carried out properly with comprehensive consideration of the patient's physical and mental state, and attention should be paid to the frequency and amount of activity should not be too large. If the patient has …
I am a liver cancer patient, can I have sex after recovery	There is no clinical evidence that patients with liver cancer should not have sex, and there are no clear guidelines on how soon to begin sex after surgery. However, sexual life should be carried out properly with comprehensive consideration of the patient's physical and mental state, and attention should be paid to the frequency and amount of activity should not be too large. If the patient has …
Is sweat steaming suitable for patients with advanced liver cancer?	Liver cancer patients in daily life should pay attention to: 1, avoid emotional fluctuations, maintain an optimistic mental state, should try to avoid or reduce all kinds of stimulation activities that cause emotional fluctuations; 2. Avoid overwork: excessive mental or physical labor can not only reduce the resistance of patients with liver cancer, promote the recurrence or metastasis of cancer,…
Can you do a lot of exercise if you get liver cancer	Liver cancer patients in daily life should pay attention to: 1, avoid emotional fluctuations, maintain an optimistic mental state, should try to avoid or reduce all kinds of stimulation activities that cause emotional fluctuations; 2. Avoid overwork: excessive mental or physical labor can not only reduce the resistance of patients with liver cancer, promote the recurrence or metastasis of cancer,…
Can patients with advanced liver cancer sit foot therapy	Liver cancer patients in daily life should pay attention to: 1, avoid emotional fluctuations, maintain an optimistic mental state, should try to avoid or reduce all kinds of stimulation activities that cause emotional fluctuations; 2. Avoid overwork: excessive mental or physical labor can not only reduce the resistance of patients with liver cancer, promote the recurrence or metastasis of cancer,…
Can patients with liver cancer smoke?	Liver cancer patients in daily life should pay attention to: 1, avoid emotional fluctuations, maintain an optimistic mental state, should try to avoid or reduce all kinds of stimulation activities that cause emotional fluctuations; 2. Avoid overwork: excessive mental or physical labor can not only reduce the resistance of patients with liver cancer, promote the recurrence or metastasis of cancer,…
Liver cancer. Can you smoke?	Liver cancer patients in daily life should pay attention to: 1, avoid emotional fluctuations, maintain an optimistic mental state, should try to avoid or reduce all kinds of stimulation activities that cause emotional fluctuations; 2. Avoid overwork: excessive mental or physical labor can not only reduce the resistance of patients with liver cancer, promote the recurrence or metastasis of cancer,…
Can patients with liver cancer walk around? Is it OK to walk?	Liver cancer patients in daily life should pay attention to: 1, avoid emotional fluctuations, maintain an optimistic mental state, should try to avoid or reduce all kinds of stimulation activities that cause emotional fluctuations; 2. Avoid overwork: excessive mental or physical labor can not only reduce the resistance of patients with liver cancer, promote the recurrence or metastasis of cancer,…
Can liver cancer exercise?	Liver cancer patients in daily life should pay attention to: 1, avoid emotional fluctuations, maintain an optimistic state of mind, should try to avoid or reduce all kinds of stimulation activities that cause emotional fluctuations; 2. Avoid overwork: excessive mental or physical labor can not only reduce the resistance of patients with liver cancer, promote the recurrence or metastasis of cancer…
Can liver cancer be massaged	Liver cancer patients in daily life should pay attention to: 1, avoid emotional fluctuations, maintain an optimistic mental state, should try to avoid or reduce all kinds of stimulation activities that cause emotional fluctuations; 2. Avoid overwork: excessive mental or physical labor can not only reduce the resistance of patients with liver cancer, promote the recurrence or metastasis of cancer,…
Get liver cancer, should rest or exercise more?	Liver cancer patients in daily life should pay attention to: 1, avoid emotional fluctuations, maintain an optimistic mental state, should try to avoid or reduce all kinds of stimulation activities that cause emotional fluctuations; 2. Avoid overwork: excessive mental or physical labor can not only reduce the resistance of patients with liver cancer, promote the recurrence or metastasis of cancer,…
My father is liver cancer has done surgery, how to maintain after surgery	In daily life, patients with liver cancer should pay attention to: 1. Avoid emotional fluctuations, maintain an optimistic mental state, and try to avoid or reduce all kinds of stimulating activities that cause emotional fluctuations; 2. Avoid overwork: excessive mental or physical labor can not only reduce the resistance of patients with liver cancer, promote the recurrence or metastasis of canc…
Is liver cancer related to smoking	Cigarettes have been linked to a variety of cancers, including liver cancer. The mechanism may be related to the harmful substances in cigarettes entering the blood, which require liver metabolism, increase the load of the liver, damage the stability of genetic material, and increase the genetic susceptibility, which will lead to an increase in the incidence of liver cancer.
Got advanced liver cancer, how to feel uncomfortable in the heart.	It is understandable that patients have low and sad emotions after being informed of the disease, but we should pay attention to regulation, try to avoid serious mood fluctuations and maintain a positive mental state. If self-adjustment is difficult, it is recommended to go to the regular hospital psychology department for treatment, and psychological counseling by psychological specialist doctor…
Got liver cancer and liver cirrhosis, can a woman still come to menstruating?	There is no evidence to support the direct impact of liver cancer and cirrhosis on a woman's period. If the regularity of menstruation is suddenly disrupted, it is recommended to go to the obstetrics and gynecology department of a regular hospital for treatment, and other causes such as gynecological diseases and pelvic metastasis of liver cancer are excluded.
I want to know liver cancer patient cold can take cold medicine	A cold is an infectious disease of the upper respiratory tract. Patients with liver cancer have a cold, and the treatment principles and drugs taken by ordinary people are not significantly different. However, it should be noted that the patient's resistance and liver metabolic ability are poor, so it is recommended to go to the respiratory department of a regular hospital for the specific types …
Liver cancer registration which department	Liver cancer can be selected according to the different conditions of patients with surgical or medical treatment, the general preferred method is surgical treatment. You can choose the regular hospital surgery first, and the doctor will finally formulate the corresponding surgical or medical treatment plan according to the patient's condition.
Liver cancer should be treated by internal medicine or surgery	Liver cancer can be selected according to the different conditions of patients with surgical or medical treatment, the general preferred method is surgical treatment. You can choose the regular hospital surgery first, and the doctor will finally formulate the corresponding surgical or medical treatment plan according to the patient's condition.
Can liver cancer patient eat longan?	Liver cancer patients in the diet should try to avoid mildew deterioration, greasy, frying, smoking, pickling, spicy stimulation, too hard easy to scratch the alimentary tract and other food intake, other no clear contraindication, daily food can be eaten. In terms of diet, the following points can be paid attention to: 1, to meet the calorie demand, balanced diet: malignant tumor is a wasting di…
Can liver cancer patients eat fish?	Liver cancer patients in the diet should try to avoid mildew deterioration, greasy, frying, smoking, pickling, spicy stimulation, too hard easy to scratch the alimentary tract and other food intake, other no clear contraindication, daily food can be eaten. In terms of diet, the following points can be paid attention to: 1, to meet the calorie demand, balanced diet: malignant tumor is a wasting di…
Can liver cancer patients eat duck blood	Liver cancer patients in the diet should try to avoid mildew deterioration, greasy, frying, smoking, pickling, spicy stimulation, too hard easy to scratch the alimentary tract and other food intake, other no clear contraindication, daily food can be eaten. In terms of diet, the following points can be paid attention to: 1, to meet the calorie demand, balanced diet: malignant tumor is a wasting di…
Can liver cancer patient drink honey?	Liver cancer patients in the diet should try to avoid mildew deterioration, greasy, frying, smoking, pickling, spicy stimulation, too hard easy to scratch the alimentary tract and other food intake, other no clear contraindication, daily food can be eaten. In terms of diet, the following points can be paid attention to: 1, to meet the calorie demand, balanced diet: malignant tumor is a wasting di…
Can liver cancer patient eat duck meat?	Liver cancer patients in the diet should try to avoid mildew deterioration, greasy, frying, smoking, pickling, spicy stimulation, too hard easy to scratch the alimentary tract and other food intake, other no clear contraindication, daily food can be eaten. In terms of diet, the following points can be paid attention to: 1, to meet the calorie demand, balanced diet: malignant tumor is a wasting di…
Can liver cancer patients eat ginseng?	Liver cancer patients in the diet should try to avoid mildew deterioration, greasy, frying, smoking, pickling, spicy stimulation, too hard easy to scratch the alimentary tract and other food intake, other no clear contraindication, daily food can be eaten. In terms of diet, the following points can be paid attention to: 1, to meet the calorie demand, balanced diet: malignant tumor is a wasting di…
Can liver cancer patients eat kelp?	Liver cancer patients in the diet should try to avoid mildew deterioration, greasy, frying, smoking, pickling, spicy stimulation, too hard easy to scratch the alimentary tract and other food intake, other no clear contraindication, daily food can be eaten. In terms of diet, the following points can be paid attention to: 1, to meet the calorie demand, balanced diet: malignant tumor is a wasting di…
Can liver cancer patients eat shrimp?	Liver cancer patients in the diet should try to avoid mildew deterioration, greasy, frying, smoking, pickling, spicy stimulation, too hard easy to scratch the alimentary tract and other food intake, other no clear contraindication, daily food can be eaten. In terms of diet, the following points can be paid attention to: 1, to meet the calorie demand, balanced diet: malignant tumor is a wasting di…
Can liver cancer patients eat pig blood tofu	Liver cancer patients in the diet should try to avoid mildew deterioration, greasy, frying, smoking, pickling, spicy stimulation, too hard easy to scratch the alimentary tract and other food intake, other no clear contraindication, daily food can be eaten. In terms of diet, the following points can be paid attention to: 1, to meet the calorie demand, balanced diet: malignant tumor is a wasting di…
Can liver cancer patients eat drape pot grass?	Liver cancer patients in the diet should try to avoid mildew deterioration, greasy, frying, smoking, pickling, spicy stimulation, too hard easy to scratch the alimentary tract and other food intake, other no clear contraindication, daily food can be eaten. In terms of diet, the following points can be paid attention to: 1, to meet the calorie demand, balanced diet: malignant tumor is a wasting di…
Can liver cancer patients drink black chicken soup?	Liver cancer patients in the diet should try to avoid mildew deterioration, greasy, frying, smoking, pickling, spicy stimulation, too hard easy to scratch the alimentary tract and other food intake, other no clear contraindication, daily food can be eaten. In terms of diet, the following points can be paid attention to: 1, to meet the calorie demand, balanced diet: malignant tumor is a wasting di…
Can liver cancer patients eat protein powder?	Liver cancer patients in the diet should try to avoid mildew deterioration, greasy, frying, smoking, pickling, spicy stimulation, too hard easy to scratch the alimentary tract and other food intake, other no clear contraindication, daily food can be eaten. In terms of diet, the following points can be paid attention to: 1, to meet the calorie demand, balanced diet: malignant tumor is a wasting di…
Can liver cancer patients eat bird's nest?	Liver cancer patients in the diet should try to avoid mildew deterioration, greasy, frying, smoking, pickling, spicy stimulation, too hard easy to scratch the alimentary tract and other food intake, other no clear contraindication, daily food can be eaten. In terms of diet, the following points can be paid attention to: 1, to meet the calorie demand, balanced diet: malignant tumor is a wasting di…
Liver cancer patients can astragalus bubble water?	Liver cancer patients in the diet should try to avoid mildew deterioration, greasy, frying, smoking, pickling, spicy stimulation, too hard easy to scratch the alimentary tract and other food intake, other no clear contraindication, daily food can be eaten. In terms of diet, the following points can be paid attention to: 1, to meet the calorie demand, balanced diet: malignant tumor is a wasting di…
Can liver cancer patients drink pork ribs soup?	Liver cancer patients in the diet should try to avoid mildew deterioration, greasy, frying, smoking, pickling, spicy stimulation, too hard easy to scratch the alimentary tract and other food intake, other no clear contraindication, daily food can be eaten. In terms of diet, the following points can be paid attention to: 1, to meet the calorie demand, balanced diet: malignant tumor is a wasting di…
Can liver cancer patients not eat roosters?	Liver cancer patients in the diet should try to avoid mildew deterioration, greasy, frying, smoking, pickling, spicy stimulation, too hard easy to scratch the alimentary tract and other food intake, other no clear contraindication, daily food can be eaten. In terms of diet, the following points can be paid attention to: 1, to meet the calorie demand, balanced diet: malignant tumor is a wasting di…
Can liver cancer patients eat seafood?	Liver cancer patients in the diet should try to avoid mildew deterioration, greasy, frying, smoking, pickling, spicy stimulation, too hard easy to scratch the alimentary tract and other food intake, other no clear contraindication, daily food can be eaten. In terms of diet, the following points can be paid attention to: 1, to meet the calorie demand, balanced diet: malignant tumor is a wasting di…
Can liver cancer patients drink goat's milk?	Liver cancer patients in the diet should try to avoid mildew deterioration, greasy, frying, smoking, pickling, spicy stimulation, too hard easy to scratch the alimentary tract and other food intake, other no clear contraindication, daily food can be eaten. In terms of diet, the following points can be paid attention to: 1, to meet the calorie demand, balanced diet: malignant tumor is a wasting di…
Can liver cancer patients eat hairy crabs?	Liver cancer patients in the diet should try to avoid mildew deterioration, greasy, frying, smoking, pickling, spicy stimulation, too hard easy to scratch the alimentary tract and other food intake, other no clear contraindication, daily food can be eaten. In terms of diet, the following points can be paid attention to: 1, to meet the calorie demand, balanced diet: malignant tumor is a wasting di…
Can liver cancer patients eat watermelon?	Liver cancer patients in the diet should try to avoid mildew deterioration, greasy, frying, smoking, pickling, spicy stimulation, too hard easy to scratch the alimentary tract and other food intake, other no clear contraindication, daily food can be eaten. In terms of diet, the following points can be paid attention to: 1, to meet the calorie demand, balanced diet: malignant tumor is a wasting di…
Can liver cancer patients eat red dates?	Liver cancer patients in the diet should try to avoid mildew deterioration, greasy, frying, smoking, pickling, spicy stimulation, too hard easy to scratch the alimentary tract and other food intake, other no clear contraindication, daily food can be eaten. In terms of diet, the following points can be paid attention to: 1, to meet the calorie demand, balanced diet: malignant tumor is a wasting di…
Can liver cancer patient drink a little red wine?	Liver cancer patients in the diet should try to avoid mildew deterioration, greasy, frying, smoking, pickling, spicy stimulation, too hard easy to scratch the alimentary tract and other food intake, other no clear contraindication, daily food can be eaten. In terms of diet, the following points can be paid attention to: 1, to meet the calorie demand, balanced diet: malignant tumor is a wasting di…
Can liver cancer patients drink mutton soup?	Liver cancer patients in the diet should try to avoid mildew deterioration, greasy, frying, smoking, pickling, spicy stimulation, too hard easy to scratch the alimentary tract and other food intake, other no clear contraindication, daily food can be eaten. In terms of diet, the following points can be paid attention to: 1, to meet the calorie demand, balanced diet: malignant tumor is a wasting di…
Can liver cancer patients eat red dates?	Liver cancer patients in the diet should try to avoid mildew deterioration, greasy, frying, smoking, pickling, spicy stimulation, too hard easy to scratch the alimentary tract and other food intake, other no clear contraindication, daily food can be eaten. In terms of diet, the following points can be paid attention to: 1, to meet the calorie demand, balanced diet: malignant tumor is a wasting di…
Can liver cancer patients eat pigeons?	Liver cancer patients in the diet should try to avoid mildew deterioration, greasy, frying, smoking, pickling, spicy stimulation, too hard easy to scratch the alimentary tract and other food intake, other no clear contraindication, daily food can be eaten. In terms of diet, the following points can be paid attention to: 1, to meet the calorie demand, balanced diet: malignant tumor is a wasting di…
Liver cancer diet can eat white sugar?	Liver cancer patients in the diet should try to avoid mildew deterioration, greasy, frying, smoking, pickling, spicy stimulation, too hard easy to scratch the alimentary tract and other food intake, other no clear contraindication, daily food can be eaten. In terms of diet, the following points can be paid attention to: 1, to meet the calorie demand, balanced diet: malignant tumor is a wasting di…
Can liver cancer patients eat crucian carp?	Liver cancer patients in the diet should try to avoid mildew deterioration, greasy, frying, smoking, pickling, spicy stimulation, too hard easy to scratch the alimentary tract and other food intake, other no clear contraindication, daily food can be eaten. In terms of diet, the following points can be paid attention to: 1, to meet the calorie demand, balanced diet: malignant tumor is a wasting di…
Can liver cancer patients eat sweets?	Liver cancer patients in the diet should try to avoid mildew deterioration, greasy, frying, smoking, pickling, spicy stimulation, too hard easy to scratch the alimentary tract and other food intake, other no clear contraindication, daily food can be eaten. In terms of diet, the following points can be paid attention to: 1, to meet the calorie demand, balanced diet: malignant tumor is a wasting di…
Can liver cancer patients eat corn?	Liver cancer patients in the diet should try to avoid mildew deterioration, greasy, frying, smoking, pickling, spicy stimulation, too hard easy to scratch the alimentary tract and other food intake, other no clear contraindication, daily food can be eaten. In terms of diet, the following points can be paid attention to: 1, to meet the calorie demand, balanced diet: malignant tumor is a wasting di…
Can liver cancer patients eat durian?	Liver cancer patients in the diet should try to avoid mildew deterioration, greasy, frying, smoking, pickling, spicy stimulation, too hard easy to scratch the alimentary tract and other food intake, other no clear contraindication, daily food can be eaten. In terms of diet, the following points can be paid attention to: 1, to meet the calorie demand, balanced diet: malignant tumor is a wasting di…
Can liver cancer patients eat soft-shelled turtles?	Liver cancer patients in the diet should try to avoid mildew deterioration, greasy, frying, smoking, pickling, spicy stimulation, too hard easy to scratch the alimentary tract and other food intake, other no clear contraindication, daily food can be eaten. In terms of diet, the following points can be paid attention to: 1, to meet the calorie demand, balanced diet: malignant tumor is a wasting di…
Can liver cancer patients eat chicken?	Liver cancer patients in the diet should try to avoid mildew deterioration, greasy, frying, smoking, pickling, spicy stimulation, too hard easy to scratch the alimentary tract and other food intake, other no clear contraindication, daily food can be eaten. In terms of diet, the following points can be paid attention to: 1, to meet the calorie demand, balanced diet: malignant tumor is a wasting di…
Can liver cancer patients eat Ganoderma?	Liver cancer patients in the diet should try to avoid mildew deterioration, greasy, frying, smoking, pickling, spicy stimulation, too hard easy to scratch the alimentary tract and other food intake, other no clear contraindication, daily food can be eaten. In terms of diet, the following points can be paid attention to: 1, to meet the calorie demand, balanced diet: malignant tumor is a wasting di…
Can liver cancer patients eat wolfberry?	Liver cancer patients in the diet should try to avoid mildew deterioration, greasy, frying, smoking, pickling, spicy stimulation, too hard easy to scratch the alimentary tract and other food intake, other no clear contraindication, daily food can be eaten. In terms of diet, the following points can be paid attention to: 1, to meet the calorie demand, balanced diet: malignant tumor is a wasting di…
Can liver cancer eat shiitake mushrooms?	Liver cancer patients in the diet should try to avoid mildew deterioration, greasy, frying, smoking, pickling, spicy stimulation, too hard easy to scratch the alimentary tract and other food intake, other no clear contraindication, daily food can be eaten. In terms of diet, the following points can be paid attention to: 1, to meet the calorie demand, balanced diet: malignant tumor is a wasting di…
Can liver cancer patients eat raisins?	Liver cancer patients in the diet should try to avoid mildew deterioration, greasy, frying, smoking, pickling, spicy stimulation, too hard easy to scratch the alimentary tract and other food intake, other no clear contraindication, daily food can be eaten. In terms of diet, the following points can be paid attention to: 1, to meet the calorie demand, balanced diet: malignant tumor is a wasting di…
Can liver cancer patients drink chicken soup?	Liver cancer patients in the diet should try to avoid mildew deterioration, greasy, frying, smoking, pickling, spicy stimulation, too hard easy to scratch the alimentary tract and other food intake, other no clear contraindication, daily food can be eaten. In terms of diet, the following points can be paid attention to: 1, to meet the calorie demand, balanced diet: malignant tumor is a wasting di…
Can pancreatic cancer patients not eat fish roe?	Liver cancer patients in the diet should try to avoid mildew deterioration, greasy, frying, smoking, pickling, spicy stimulation, too hard easy to scratch the alimentary tract and other food intake, other no clear contraindication, daily food can be eaten. In terms of diet, the following points can be paid attention to: 1, to meet the calorie demand, balanced diet: malignant tumor is a wasting di…
Can liver cancer patients eat sea cucumber?	Liver cancer patients in the diet should try to avoid mildew deterioration, greasy, frying, smoking, pickling, spicy stimulation, too hard easy to scratch the alimentary tract and other food intake, other no clear contraindication, daily food can be eaten. In terms of diet, the following points can be paid attention to: 1, to meet the calorie demand, balanced diet: malignant tumor is a wasting di…
Can liver cancer patients eat shrimp?	Liver cancer patients in the diet should try to avoid mildew deterioration, greasy, frying, smoking, pickling, spicy stimulation, too hard easy to scratch the alimentary tract and other food intake, other no clear contraindication, daily food can be eaten. In terms of diet, the following points can be paid attention to: 1, to meet the calorie demand, balanced diet: malignant tumor is a wasting di…
Can you eat eggplant after liver cancer surgery?	Liver cancer patients in the diet should try to avoid mildew deterioration, greasy, frying, smoking, pickling, spicy stimulation, too hard easy to scratch the alimentary tract and other food intake, other no clear contraindication, daily food can be eaten. In terms of diet, the following points can be paid attention to: 1, to meet the calorie demand, balanced diet: malignant tumor is a wasting di…
Can liver cancer patient eat bean product?	Liver cancer patients in the diet should try to avoid mildew deterioration, greasy, frying, smoking, pickling, spicy stimulation, too hard easy to scratch the alimentary tract and other food intake, other no clear contraindication, daily food can be eaten. In terms of diet, the following points can be paid attention to: 1, to meet the calorie demand, balanced diet: malignant tumor is a wasting di…
Can liver cancer patients eat squid?	Liver cancer patients in the diet should try to avoid mildew deterioration, greasy, frying, smoking, pickling, spicy stimulation, too hard easy to scratch the alimentary tract and other food intake, other no clear contraindication, daily food can be eaten. In terms of diet, the following points can be paid attention to: 1, to meet the calorie demand, balanced diet: malignant tumor is a wasting di…
Can liver cancer patients eat bird's nest?	Liver cancer patients in the diet should try to avoid mildew deterioration, greasy, frying, smoking, pickling, spicy stimulation, too hard easy to scratch the alimentary tract and other food intake, other no clear contraindication, daily food can be eaten. In terms of diet, the following points can be paid attention to: 1, to meet the calorie demand, balanced diet: malignant tumor is a wasting di…
What is the best thing to eat in late liver cancer	Liver cancer patients in the diet should try to avoid mildew deterioration, greasy, frying, smoking, pickling, spicy stimulation, too hard easy to scratch the alimentary tract and other food intake, other no clear contraindication, daily food can be eaten. In terms of diet, the following points can be paid attention to: 1, to meet the calorie demand, balanced diet: malignant tumor is a wasting di…
What contraindication does liver cancer have late?	Liver cancer patients in the diet should try to avoid mildew deterioration, greasy, frying, smoking, pickling, spicy stimulation, too hard easy to scratch the alimentary tract and other food intake, other no clear contraindication, daily food can be eaten. In terms of diet, the following points can be paid attention to: 1, to meet the calorie demand, balanced diet: malignant tumor is a wasting di…
Can liver cancer late drink Angelica astragalus tea?	Liver cancer patients in the diet should try to avoid mildew deterioration, greasy, frying, smoking, pickling, spicy stimulation, too hard easy to scratch the alimentary tract and other food intake, other no clear contraindication, daily food can be eaten. In terms of diet, the following points can be paid attention to: 1, to meet the calorie demand, balanced diet: malignant tumor is a wasting di…
Can you drink crucian fish soup and big bone soup after liver cancer surgery	Liver cancer patients in the diet should try to avoid mildew deterioration, greasy, frying, smoking, pickling, spicy stimulation, too hard easy to scratch the alimentary tract and other food intake, other no clear contraindication, daily food can be eaten. In terms of diet, the following points can be paid attention to: 1, to meet the calorie demand, balanced diet: malignant tumor is a wasting di…
Can late liver cancer not eat milk powder?	Liver cancer patients in the diet should try to avoid mildew deterioration, greasy, frying, smoking, pickling, spicy stimulation, too hard easy to scratch the alimentary tract and other food intake, other no clear contraindication, daily food can be eaten. In terms of diet, the following points can be paid attention to: 1, to meet the calorie demand, balanced diet: malignant tumor is a wasting di…
Liver cancer late stage, can you eat ejiao?	Liver cancer patients in the diet should try to avoid mildew deterioration, greasy, frying, smoking, pickling, spicy stimulation, too hard easy to scratch the alimentary tract and other food intake, other no clear contraindication, daily food can be eaten. In terms of diet, the following points can be paid attention to: 1, to meet the calorie demand, balanced diet: malignant tumor is a wasting di…
Liver cancer late and ache mad can eat bamboo shoots	Liver cancer patients in the diet should try to avoid mildew deterioration, greasy, frying, smoking, pickling, spicy stimulation, too hard easy to scratch the alimentary tract and other food intake, other no clear contraindication, daily food can be eaten. In terms of diet, the following points can be paid attention to: 1, to meet the calorie demand, balanced diet: malignant tumor is a wasting di…
What contraindication does liver cancer patient have?	Liver cancer patients in the diet should try to avoid mildew deterioration, greasy, frying, smoking, pickling, spicy stimulation, too hard easy to scratch the alimentary tract and other food intake, other no clear contraindication, daily food can be eaten. In terms of diet, the following points can be paid attention to: 1, to meet the calorie demand, balanced diet: malignant tumor is a wasting di…
Liver cancer what fruit cannot eat	Liver cancer patients in the diet should try to avoid mildew deterioration, greasy, frying, smoking, pickling, spicy stimulation, too hard easy to scratch the alimentary tract and other food intake, other no clear contraindication, daily food can be eaten. In terms of diet, the following points can be paid attention to: 1, to meet the calorie demand, balanced diet: malignant tumor is a wasting di…
Liver cancer patients need to avoid eating	Liver cancer patients in the diet should try to avoid mildew deterioration, greasy, frying, smoking, pickling, spicy stimulation, too hard easy to scratch the alimentary tract and other food intake, other no clear contraindication, daily food can be eaten. In terms of diet, the following points can be paid attention to: 1, to meet the calorie demand, balanced diet: malignant tumor is a wasting di…
How long to eat beef and mutton after liver cancer surgery	Liver cancer patients in the diet should try to avoid mildew deterioration, greasy, frying, smoking, pickling, spicy stimulation, too hard easy to scratch the alimentary tract and other food intake, other no clear contraindication, daily food can be eaten. In terms of diet, the following points can be paid attention to: 1, to meet the calorie demand, balanced diet: malignant tumor is a wasting di…
What fish can't liver cancer eat	Liver cancer patients in the diet should try to avoid mildew deterioration, greasy, frying, smoking, pickling, spicy stimulation, too hard easy to scratch the alimentary tract and other food intake, other no clear contraindication, daily food can be eaten. In terms of diet, the following points can be paid attention to: 1, to meet the calorie demand, balanced diet: malignant tumor is a wasting di…
Had liver cancer can you eat chestnuts?	Liver cancer patients in the diet should try to avoid mildew deterioration, greasy, frying, smoking, pickling, spicy stimulation, too hard easy to scratch the alimentary tract and other food intake, other no clear contraindication, daily food can be eaten. In terms of diet, the following points can be paid attention to: 1, to meet the calorie demand, balanced diet: malignant tumor is a wasting di…
Got liver cancer can eat cordyceps?	Liver cancer patients in the diet should try to avoid mildew deterioration, greasy, frying, smoking, pickling, spicy stimulation, too hard easy to scratch the alimentary tract and other food intake, other no clear contraindication, daily food can be eaten. In terms of diet, the following points can be paid attention to: 1, to meet the calorie demand, balanced diet: malignant tumor is a wasting di…
Got liver cancer can eat duck meat	Liver cancer patients in the diet should try to avoid mildew deterioration, greasy, frying, smoking, pickling, spicy stimulation, too hard easy to scratch the alimentary tract and other food intake, other no clear contraindication, daily food can be eaten. In terms of diet, the following points can be paid attention to: 1, to meet the calorie demand, balanced diet: malignant tumor is a wasting di…
Got liver cancer to eat what good?	Liver cancer patients in the diet should try to avoid mildew deterioration, greasy, frying, smoking, pickling, spicy stimulation, too hard easy to scratch the alimentary tract and other food intake, other no clear contraindication, daily food can be eaten. In terms of diet, the following points can be paid attention to: 1, to meet the calorie demand, balanced diet: malignant tumor is a wasting di…
Suffered from liver cancer can eat walnuts?	Liver cancer patients in the diet should try to avoid mildew deterioration, greasy, frying, smoking, pickling, spicy stimulation, too hard easy to scratch the alimentary tract and other food intake, other no clear contraindication, daily food can be eaten. In terms of diet, the following points can be paid attention to: 1, to meet the calorie demand, balanced diet: malignant tumor is a wasting di…
Got liver cancer still can drink coffee?	Liver cancer patients in the diet should try to avoid mildew deterioration, greasy, frying, smoking, pickling, spicy stimulation, too hard easy to scratch the alimentary tract and other food intake, other no clear contraindication, daily food can be eaten. In terms of diet, the following points can be paid attention to: 1, to meet the calorie demand, balanced diet: malignant tumor is a wasting di…
Can the patient who suffered from liver cancer eat toona	Liver cancer patients in the diet should try to avoid mildew deterioration, greasy, frying, smoking, pickling, spicy stimulation, too hard easy to scratch the alimentary tract and other food intake, other no clear contraindication, daily food can be eaten. In terms of diet, the following points can be paid attention to: 1, to meet the calorie demand, balanced diet: malignant tumor is a wasting di…
Can liver cancer patients eat crucian carp	Liver cancer patients in the diet should try to avoid mildew deterioration, greasy, frying, smoking, pickling, spicy stimulation, too hard easy to scratch the alimentary tract and other food intake, other no clear contraindication, daily food can be eaten. In terms of diet, the following points can be paid attention to: 1, to meet the calorie demand, balanced diet: malignant tumor is a wasting di…
Can liver cancer patients eat goat's milk	Liver cancer patients in the diet should try to avoid mildew deterioration, greasy, frying, smoking, pickling, spicy stimulation, too hard easy to scratch the alimentary tract and other food intake, other no clear contraindication, daily food can be eaten. In terms of diet, the following points can be paid attention to: 1, to meet the calorie demand, balanced diet: malignant tumor is a wasting di…
Can liver cancer patients eat pumpkins?	Liver cancer patients in the diet should try to avoid mildew deterioration, greasy, frying, smoking, pickling, spicy stimulation, too hard easy to scratch the alimentary tract and other food intake, other no clear contraindication, daily food can be eaten. In terms of diet, the following points can be paid attention to: 1, to meet the calorie demand, balanced diet: malignant tumor is a wasting di…
Can liver cancer patients eat bananas	Liver cancer patients in the diet should try to avoid mildew deterioration, greasy, frying, smoking, pickling, spicy stimulation, too hard easy to scratch the alimentary tract and other food intake, other no clear contraindication, daily food can be eaten. In terms of diet, the following points can be paid attention to: 1, to meet the calorie demand, balanced diet: malignant tumor is a wasting di…
Can liver cancer patients drink soy milk	Liver cancer patients in the diet should try to avoid mildew deterioration, greasy, frying, smoking, pickling, spicy stimulation, too hard easy to scratch the alimentary tract and other food intake, other no clear contraindication, daily food can be eaten. In terms of diet, the following points can be paid attention to: 1, to meet the calorie demand, balanced diet: malignant tumor is a wasting di…
Can liver cancer patients eat things like scallion or garlic	Liver cancer patients in the diet should try to avoid mildew deterioration, greasy, frying, smoking, pickling, spicy stimulation, too hard easy to scratch the alimentary tract and other food intake, other no clear contraindication, daily food can be eaten. In terms of diet, the following points can be paid attention to: 1, to meet the calorie demand, balanced diet: malignant tumor is a wasting di…
Can liver cancer patients eat fish	Liver cancer patients in the diet should try to avoid mildew deterioration, greasy, frying, smoking, pickling, spicy stimulation, too hard easy to scratch the alimentary tract and other food intake, other no clear contraindication, daily food can be eaten. In terms of diet, the following points can be paid attention to: 1, to meet the calorie demand, balanced diet: malignant tumor is a wasting di…
Can liver cancer patients eat eggs?	Liver cancer patients in the diet should try to avoid mildew deterioration, greasy, frying, smoking, pickling, spicy stimulation, too hard easy to scratch the alimentary tract and other food intake, other no clear contraindication, daily food can be eaten. In terms of diet, the following points can be paid attention to: 1, to meet the calorie demand, balanced diet: malignant tumor is a wasting di…
Can liver cancer patients eat beef?	Liver cancer patients in the diet should try to avoid mildew deterioration, greasy, frying, smoking, pickling, spicy stimulation, too hard easy to scratch the alimentary tract and other food intake, other no clear contraindication, daily food can be eaten. In terms of diet, the following points can be paid attention to: 1, to meet the calorie demand, balanced diet: malignant tumor is a wasting di…
Can liver cancer ascites eat silkworm pupae	Liver cancer patients in the diet should try to avoid mildew deterioration, greasy, frying, smoking, pickling, spicy stimulation, too hard easy to scratch the alimentary tract and other food intake, other no clear contraindication, daily food can be eaten. In terms of diet, the following points can be paid attention to: 1, to meet the calorie demand, balanced diet: malignant tumor is a wasting di…
Can liver cancer patients eat carrots	Liver cancer patients in the diet should try to avoid mildew deterioration, greasy, frying, smoking, pickling, spicy stimulation, too hard easy to scratch the alimentary tract and other food intake, other no clear contraindication, daily food can be eaten. In terms of diet, the following points can be paid attention to: 1, to meet the calorie demand, balanced diet: malignant tumor is a wasting di…
Can liver cancer patients eat bananas	Liver cancer patients in the diet should try to avoid mildew deterioration, greasy, frying, smoking, pickling, spicy stimulation, too hard easy to scratch the alimentary tract and other food intake, other no clear contraindication, daily food can be eaten. In terms of diet, the following points can be paid attention to: 1, to meet the calorie demand, balanced diet: malignant tumor is a wasting di…
Can liver cancer patients eat ejiao	Liver cancer patients in the diet should try to avoid mildew deterioration, greasy, frying, smoking, pickling, spicy stimulation, too hard easy to scratch the alimentary tract and other food intake, other no clear contraindication, daily food can be eaten. In terms of diet, the following points can be paid attention to: 1, to meet the calorie demand, balanced diet: malignant tumor is a wasting di…
Can liver cancer patients eat loach	Liver cancer patients in the diet should try to avoid mildew deterioration, greasy, frying, smoking, pickling, spicy stimulation, too hard easy to scratch the alimentary tract and other food intake, other no clear contraindication, daily food can be eaten. In terms of diet, the following points can be paid attention to: 1, to meet the calorie demand, balanced diet: malignant tumor is a wasting di…
Can liver cancer patients eat taxus	Liver cancer patients in the diet should try to avoid mildew deterioration, greasy, frying, smoking, pickling, spicy stimulation, too hard easy to scratch the alimentary tract and other food intake, other no clear contraindication, daily food can be eaten. In terms of diet, the following points can be paid attention to: 1, to meet the calorie demand, balanced diet: malignant tumor is a wasting di…
Can liver cancer patients eat steamed bread	Liver cancer patients in the diet should try to avoid mildew deterioration, greasy, frying, smoking, pickling, spicy stimulation, too hard easy to scratch the alimentary tract and other food intake, other no clear contraindication, daily food can be eaten. In terms of diet, the following points can be paid attention to: 1, to meet the calorie demand, balanced diet: malignant tumor is a wasting di…
Can liver cancer patients drink mung bean soup	Liver cancer patients in the diet should try to avoid mildew deterioration, greasy, frying, smoking, pickling, spicy stimulation, too hard easy to scratch the alimentary tract and other food intake, other no clear contraindication, daily food can be eaten. In terms of diet, the following points can be paid attention to: 1, to meet the calorie demand, balanced diet: malignant tumor is a wasting di…
Can liver cancer patients eat chicken	Liver cancer patients in the diet should try to avoid mildew deterioration, greasy, frying, smoking, pickling, spicy stimulation, too hard easy to scratch the alimentary tract and other food intake, other no clear contraindication, daily food can be eaten. In terms of diet, the following points can be paid attention to: 1, to meet the calorie demand, balanced diet: malignant tumor is a wasting di…
Can liver cancer patients eat walnuts?	Liver cancer patients in the diet should try to avoid mildew deterioration, greasy, frying, smoking, pickling, spicy stimulation, too hard easy to scratch the alimentary tract and other food intake, other no clear contraindication, daily food can be eaten. In terms of diet, the following points can be paid attention to: 1, to meet the calorie demand, balanced diet: malignant tumor is a wasting di…
Can liver cancer patients eat squid	Liver cancer patients in the diet should try to avoid mildew deterioration, greasy, frying, smoking, pickling, spicy stimulation, too hard easy to scratch the alimentary tract and other food intake, other no clear contraindication, daily food can be eaten. In terms of diet, the following points can be paid attention to: 1, to meet the calorie demand, balanced diet: malignant tumor is a wasting di…
Liver cancer patients can't eat grilled things. That cake bread can eat	Liver cancer patients in the diet should try to avoid mildew deterioration, greasy, frying, smoking, pickling, spicy stimulation, too hard easy to scratch the alimentary tract and other food intake, other no clear contraindication, daily food can be eaten. In terms of diet, the following points can be paid attention to: 1, to meet the calorie demand, balanced diet: malignant tumor is a wasting di…
Can liver cancer patients eat shrimp?	Liver cancer patients in the diet should try to avoid mildew deterioration, greasy, frying, smoking, pickling, spicy stimulation, too hard easy to scratch the alimentary tract and other food intake, other no clear contraindication, daily food can be eaten. In terms of diet, the following points can be paid attention to: 1, to meet the calorie demand, balanced diet: malignant tumor is a wasting di…
Liver cancer patients can eat ginger, scallion, garlic?	Liver cancer patients in the diet should try to avoid mildew deterioration, greasy, frying, smoking, pickling, spicy stimulation, too hard easy to scratch the alimentary tract and other food intake, other no clear contraindication, daily food can be eaten. In terms of diet, the following points can be paid attention to: 1, to meet the calorie demand, balanced diet: malignant tumor is a wasting di…
Can liver cancer patients eat mutton	Liver cancer patients in the diet should try to avoid mildew deterioration, greasy, frying, smoking, pickling, spicy stimulation, too hard easy to scratch the alimentary tract and other food intake, other no clear contraindication, daily food can be eaten. In terms of diet, the following points can be paid attention to: 1, to meet the calorie demand, balanced diet: malignant tumor is a wasting di…
Can liver cancer patients eat tremella	Liver cancer patients in the diet should try to avoid mildew deterioration, greasy, frying, smoking, pickling, spicy stimulation, too hard easy to scratch the alimentary tract and other food intake, other no clear contraindication, daily food can be eaten. In terms of diet, the following points can be paid attention to: 1, to meet the calorie demand, balanced diet: malignant tumor is a wasting di…
Hello! Can liver cancer patients eat crabs	Liver cancer patients in the diet should try to avoid mildew deterioration, greasy, frying, smoking, pickling, spicy stimulation, too hard easy to scratch the alimentary tract and other food intake, other no clear contraindication, daily food can be eaten. In terms of diet, the following points can be paid attention to: 1, to meet the calorie demand, balanced diet: malignant tumor is a wasting di…
Liver cancer late eat dragon fruit good?	Liver cancer patients in the diet should try to avoid mildew deterioration, greasy, frying, smoking, pickling, spicy stimulation, too hard easy to scratch the alimentary tract and other food intake, other no clear contraindication, daily food can be eaten. In terms of diet, the following points can be paid attention to: 1, to meet the calorie demand, balanced diet: malignant tumor is a wasting di…
Does liver cancer patient drink soyabane milk OK	Liver cancer patients in the diet should try to avoid mildew deterioration, greasy, frying, smoking, pickling, spicy stimulation, too hard easy to scratch the alimentary tract and other food intake, other no clear contraindication, daily food can be eaten. In terms of diet, the following points can be paid attention to: 1, to meet the calorie demand, balanced diet: malignant tumor is a wasting di…
Can liver cancer patients eat radish?	Liver cancer patients in the diet should try to avoid mildew deterioration, greasy, frying, smoking, pickling, spicy stimulation, too hard easy to scratch the alimentary tract and other food intake, other no clear contraindication, daily food can be eaten. In terms of diet, the following points can be paid attention to: 1, to meet the calorie demand, balanced diet: malignant tumor is a wasting di…
Can liver cancer patients eat more hawthorn slices	Liver cancer patients in the diet should try to avoid mildew deterioration, greasy, frying, smoking, pickling, spicy stimulation, too hard easy to scratch the alimentary tract and other food intake, other no clear contraindication, daily food can be eaten. In terms of diet, the following points can be paid attention to: 1, to meet the calorie demand, balanced diet: malignant tumor is a wasting di…
Can liver cancer patients still eat dog meat	Liver cancer patients in the diet should try to avoid mildew deterioration, greasy, frying, smoking, pickling, spicy stimulation, too hard easy to scratch the alimentary tract and other food intake, other no clear contraindication, daily food can be eaten. In terms of diet, the following points can be paid attention to: 1, to meet the calorie demand, balanced diet: malignant tumor is a wasting di…
Patients with advanced liver cancer can eat eggs. Chicken?	Liver cancer patients in the diet should try to avoid mildew deterioration, greasy, frying, smoking, pickling, spicy stimulation, too hard easy to scratch the alimentary tract and other food intake, other no clear contraindication, daily food can be eaten. In terms of diet, the following points can be paid attention to: 1, to meet the calorie demand, balanced diet: malignant tumor is a wasting di…
Can't liver cancer patients eat roosters?	Liver cancer patients in the diet should try to avoid mildew deterioration, greasy, frying, smoking, pickling, spicy stimulation, too hard easy to scratch the alimentary tract and other food intake, other no clear contraindication, daily food can be eaten. In terms of diet, the following points can be paid attention to: 1, to meet the calorie demand, balanced diet: malignant tumor is a wasting di…
Can liver cancer patients eat bamboo shoots more?	Liver cancer patients in the diet should try to avoid mildew deterioration, greasy, frying, smoking, pickling, spicy stimulation, too hard easy to scratch the alimentary tract and other food intake, other no clear contraindication, daily food can be eaten. In terms of diet, the following points can be paid attention to: 1, to meet the calorie demand, balanced diet: malignant tumor is a wasting di…
Can liver cancer patients eat duck	Liver cancer patients in the diet should try to avoid mildew deterioration, greasy, frying, smoking, pickling, spicy stimulation, too hard easy to scratch the alimentary tract and other food intake, other no clear contraindication, daily food can be eaten. In terms of diet, the following points can be paid attention to: 1, to meet the calorie demand, balanced diet: malignant tumor is a wasting di…
Liver cancer patients can eat eggplant	Liver cancer patients in the diet should try to avoid mildew deterioration, greasy, frying, smoking, pickling, spicy stimulation, too hard easy to scratch the alimentary tract and other food intake, other no clear contraindication, daily food can be eaten. In terms of diet, the following points can be paid attention to: 1, to meet the calorie demand, balanced diet: malignant tumor is a wasting di…
Can patients with advanced liver cancer eat sea cucumber and abalone	Liver cancer patients in the diet should try to avoid mildew deterioration, greasy, frying, smoking, pickling, spicy stimulation, too hard easy to scratch the alimentary tract and other food intake, other no clear contraindication, daily food can be eaten. In terms of diet, the following points can be paid attention to: 1, to meet the calorie demand, balanced diet: malignant tumor is a wasting di…
Can patients with advanced liver cancer eat musk	Liver cancer patients in the diet should try to avoid mildew deterioration, greasy, frying, smoking, pickling, spicy stimulation, too hard easy to scratch the alimentary tract and other food intake, other no clear contraindication, daily food can be eaten. In terms of diet, the following points can be paid attention to: 1, to meet the calorie demand, balanced diet: malignant tumor is a wasting di…
Can patients with advanced liver cancer eat pupae	Liver cancer patients in the diet should try to avoid mildew deterioration, greasy, frying, smoking, pickling, spicy stimulation, too hard easy to scratch the alimentary tract and other food intake, other no clear contraindication, daily food can be eaten. In terms of diet, the following points can be paid attention to: 1, to meet the calorie demand, balanced diet: malignant tumor is a wasting di…
Can patients with advanced liver cancer eat pigeons?	Liver cancer patients in the diet should try to avoid mildew deterioration, greasy, frying, smoking, pickling, spicy stimulation, too hard easy to scratch the alimentary tract and other food intake, other no clear contraindication, daily food can be eaten. In terms of diet, the following points can be paid attention to: 1, to meet the calorie demand, balanced diet: malignant tumor is a wasting di…
Dietary contraindications for patients with liver cancer	Liver cancer patients in the diet should try to avoid mildew deterioration, greasy, frying, smoking, pickling, spicy stimulation, too hard easy to scratch the alimentary tract and other food intake, other no clear contraindication, daily food can be eaten. In terms of diet, the following points can be paid attention to: 1, to meet the calorie demand, balanced diet: malignant tumor is a wasting di…
How to regulate the diet of patients with advanced liver cancer	Liver cancer patients in the diet should try to avoid mildew deterioration, greasy, frying, smoking, pickling, spicy stimulation, too hard easy to scratch the alimentary tract and other food intake, other no clear contraindication, daily food can be eaten. In terms of diet, the following points can be paid attention to: 1, to meet the calorie demand, balanced diet: malignant tumor is a wasting di…
Do liver cancer late eat sweets?	Liver cancer patients in the diet should try to avoid mildew deterioration, greasy, frying, smoking, pickling, spicy stimulation, too hard easy to scratch the alimentary tract and other food intake, other no clear contraindication, daily food can be eaten. In terms of diet, the following points can be paid attention to: 1, to meet the calorie demand, balanced diet: malignant tumor is a wasting di…
What soup is primary liver cancer to drink?	Liver cancer patients in the diet should try to avoid mildew deterioration, greasy, frying, smoking, pickling, spicy stimulation, too hard easy to scratch the alimentary tract and other food intake, other no clear contraindication, daily food can be eaten. In terms of diet, the following points can be paid attention to: 1, to meet the calorie demand, balanced diet: malignant tumor is a wasting di…
What is the dietary contraindication of liver cancer patient?	Liver cancer patients in the diet should try to avoid mildew deterioration, greasy, frying, smoking, pickling, spicy stimulation, too hard easy to scratch the alimentary tract and other food intake, other no clear contraindication, daily food can be eaten. In terms of diet, the following points can be paid attention to: 1, to meet the calorie demand, balanced diet: malignant tumor is a wasting di…
Can my father eat pigeon if he gets liver cancer?	Liver cancer patients in the diet should try to avoid mildew deterioration, greasy, frying, smoking, pickling, spicy stimulation, too hard easy to scratch the alimentary tract and other food intake, other no clear contraindication, daily food can be eaten. In terms of diet, the following points can be paid attention to: 1, to meet the calorie demand, balanced diet: malignant tumor is a wasting di…
I want excuse me liver cancer late can drink honey water.	Liver cancer patients in the diet should try to avoid mildew deterioration, greasy, frying, smoking, pickling, spicy stimulation, too hard easy to scratch the alimentary tract and other food intake, other no clear contraindication, daily food can be eaten. In terms of diet, the following points can be paid attention to: 1, to meet the calorie demand, balanced diet: malignant tumor is a wasting di…
Can liver cancer eat scallion ginger garlic?	Liver cancer patients in the diet should try to avoid mildew deterioration, greasy, frying, smoking, pickling, spicy stimulation, too hard easy to scratch the alimentary tract and other food intake, other no clear contraindication, daily food can be eaten. In terms of diet, the following points can be paid attention to: 1, to meet the calorie demand, balanced diet: malignant tumor is a wasting di…
Can liver cancer eat spicy?	Liver cancer patients in the diet should try to avoid mildew deterioration, greasy, frying, smoking, pickling, spicy stimulation, too hard easy to scratch the alimentary tract and other food intake, other no clear contraindication, daily food can be eaten. In terms of diet, the following points can be paid attention to: 1, to meet the calorie demand, balanced diet: malignant tumor is a wasting di…
Can liver cancer eat jujube medlar?	Liver cancer patients in the diet should try to avoid mildew deterioration, greasy, frying, smoking, pickling, spicy stimulation, too hard easy to scratch the alimentary tract and other food intake, other no clear contraindication, daily food can be eaten. In terms of diet, the following points can be paid attention to: 1, to meet the calorie demand, balanced diet: malignant tumor is a wasting di…
Can liver cancer eat cordyceps flower?	Liver cancer patients in the diet should try to avoid mildew deterioration, greasy, frying, smoking, pickling, spicy stimulation, too hard easy to scratch the alimentary tract and other food intake, other no clear contraindication, daily food can be eaten. In terms of diet, the following points can be paid attention to: 1, to meet the calorie demand, balanced diet: malignant tumor is a wasting di…
Can liver cancer eat male chicken?	Liver cancer patients in the diet should try to avoid mildew deterioration, greasy, frying, smoking, pickling, spicy stimulation, too hard easy to scratch the alimentary tract and other food intake, other no clear contraindication, daily food can be eaten. In terms of diet, the following points can be paid attention to: 1, to meet the calorie demand, balanced diet: malignant tumor is a wasting di…
Can people with liver cancer eat soy bean sprouts	Liver cancer patients in the diet should try to avoid mildew deterioration, greasy, frying, smoking, pickling, spicy stimulation, too hard easy to scratch the alimentary tract and other food intake, other no clear contraindication, daily food can be eaten. In terms of diet, the following points can be paid attention to: 1, to meet the calorie demand, balanced diet: malignant tumor is a wasting di…
Can you eat bean food after having liver cancer disease?	Liver cancer patients in the diet should try to avoid mildew deterioration, greasy, frying, smoking, pickling, spicy stimulation, too hard easy to scratch the alimentary tract and other food intake, other no clear contraindication, daily food can be eaten. In terms of diet, the following points can be paid attention to: 1, to meet the calorie demand, balanced diet: malignant tumor is a wasting di…
Can liver cancer late eat protein powder?	Liver cancer patients in the diet should try to avoid mildew deterioration, greasy, frying, smoking, pickling, spicy stimulation, too hard easy to scratch the alimentary tract and other food intake, other no clear contraindication, daily food can be eaten. In terms of diet, the following points can be paid attention to: 1, to meet the calorie demand, balanced diet: malignant tumor is a wasting di…
Can late liver cancer eat oranges	Liver cancer patients in the diet should try to avoid mildew deterioration, greasy, frying, smoking, pickling, spicy stimulation, too hard easy to scratch the alimentary tract and other food intake, other no clear contraindication, daily food can be eaten. In terms of diet, the following points can be paid attention to: 1, to meet the calorie demand, balanced diet: malignant tumor is a wasting di…
Liver cancer late can eat mangostema	Liver cancer patients in the diet should try to avoid mildew deterioration, greasy, frying, smoking, pickling, spicy stimulation, too hard easy to scratch the alimentary tract and other food intake, other no clear contraindication, daily food can be eaten. In terms of diet, the following points can be paid attention to: 1, to meet the calorie demand, balanced diet: malignant tumor is a wasting di…
Can liver cancer late eat longan	Liver cancer patients in the diet should try to avoid mildew deterioration, greasy, frying, smoking, pickling, spicy stimulation, too hard easy to scratch the alimentary tract and other food intake, other no clear contraindication, daily food can be eaten. In terms of diet, the following points can be paid attention to: 1, to meet the calorie demand, balanced diet: malignant tumor is a wasting di…
Can liver cancer late eat carrot?	Liver cancer patients in the diet should try to avoid mildew deterioration, greasy, frying, smoking, pickling, spicy stimulation, too hard easy to scratch the alimentary tract and other food intake, other no clear contraindication, daily food can be eaten. In terms of diet, the following points can be paid attention to: 1, to meet the calorie demand, balanced diet: malignant tumor is a wasting di…
Can late liver cancer eat ginsenoside	Liver cancer patients in the diet should try to avoid mildew deterioration, greasy, frying, smoking, pickling, spicy stimulation, too hard easy to scratch the alimentary tract and other food intake, other no clear contraindication, daily food can be eaten. In terms of diet, the following points can be paid attention to: 1, to meet the calorie demand, balanced diet: malignant tumor is a wasting di…
Can late liver cancer eat American ginseng	Liver cancer patients in the diet should try to avoid mildew deterioration, greasy, frying, smoking, pickling, spicy stimulation, too hard easy to scratch the alimentary tract and other food intake, other no clear contraindication, daily food can be eaten. In terms of diet, the following points can be paid attention to: 1, to meet the calorie demand, balanced diet: malignant tumor is a wasting di…
Can late liver cancer eat mutton?	Liver cancer patients in the diet should try to avoid mildew deterioration, greasy, frying, smoking, pickling, spicy stimulation, too hard easy to scratch the alimentary tract and other food intake, other no clear contraindication, daily food can be eaten. In terms of diet, the following points can be paid attention to: 1, to meet the calorie demand, balanced diet: malignant tumor is a wasting di…
Liver cancer late can eat fish?	Liver cancer patients in the diet should try to avoid mildew deterioration, greasy, frying, smoking, pickling, spicy stimulation, too hard easy to scratch the alimentary tract and other food intake, other no clear contraindication, daily food can be eaten. In terms of diet, the following points can be paid attention to: 1, to meet the calorie demand, balanced diet: malignant tumor is a wasting di…
Can late liver cancer eat ejiao?	Liver cancer patients in the diet should try to avoid mildew deterioration, greasy, frying, smoking, pickling, spicy stimulation, too hard easy to scratch the alimentary tract and other food intake, other no clear contraindication, daily food can be eaten. In terms of diet, the following points can be paid attention to: 1, to meet the calorie demand, balanced diet: malignant tumor is a wasting di…
Can late liver cancer eat mangostema have benefit	Liver cancer patients in the diet should try to avoid mildew deterioration, greasy, frying, smoking, pickling, spicy stimulation, too hard easy to scratch the alimentary tract and other food intake, other no clear contraindication, daily food can be eaten. In terms of diet, the following points can be paid attention to: 1, to meet the calorie demand, balanced diet: malignant tumor is a wasting di…
Can late liver cancer eat ejiao? Can there be any adverse reaction	Liver cancer patients in the diet should try to avoid mildew deterioration, greasy, frying, smoking, pickling, spicy stimulation, too hard easy to scratch the alimentary tract and other food intake, other no clear contraindication, daily food can be eaten. In terms of diet, the following points can be paid attention to: 1, to meet the calorie demand, balanced diet: malignant tumor is a wasting di…
Can liver cancer late eat royal jelly?	Liver cancer patients in the diet should try to avoid mildew deterioration, greasy, frying, smoking, pickling, spicy stimulation, too hard easy to scratch the alimentary tract and other food intake, other no clear contraindication, daily food can be eaten. In terms of diet, the following points can be paid attention to: 1, to meet the calorie demand, balanced diet: malignant tumor is a wasting di…
Can durian be eaten in advanced stage of liver cancer?	Liver cancer patients in the diet should try to avoid mildew deterioration, greasy, frying, smoking, pickling, spicy stimulation, too hard easy to scratch the alimentary tract and other food intake, other no clear contraindication, daily food can be eaten. In terms of diet, the following points can be paid attention to: 1, to meet the calorie demand, balanced diet: malignant tumor is a wasting di…
Can you eat nuts in advanced liver cancer	Liver cancer patients in the diet should try to avoid mildew deterioration, greasy, frying, smoking, pickling, spicy stimulation, too hard easy to scratch the alimentary tract and other food intake, other no clear contraindication, daily food can be eaten. In terms of diet, the following points can be paid attention to: 1, to meet the calorie demand, balanced diet: malignant tumor is a wasting di…
Can you eat oatmeal in advanced liver cancer?	Liver cancer patients in the diet should try to avoid mildew deterioration, greasy, frying, smoking, pickling, spicy stimulation, too hard easy to scratch the alimentary tract and other food intake, other no clear contraindication, daily food can be eaten. In terms of diet, the following points can be paid attention to: 1, to meet the calorie demand, balanced diet: malignant tumor is a wasting di…
Can late liver cancer drink mutton soup?	Liver cancer patients in the diet should try to avoid mildew deterioration, greasy, frying, smoking, pickling, spicy stimulation, too hard easy to scratch the alimentary tract and other food intake, other no clear contraindication, daily food can be eaten. In terms of diet, the following points can be paid attention to: 1, to meet the calorie demand, balanced diet: malignant tumor is a wasting di…
Can late liver cancer eat protein	Liver cancer patients in the diet should try to avoid mildew deterioration, greasy, frying, smoking, pickling, spicy stimulation, too hard easy to scratch the alimentary tract and other food intake, other no clear contraindication, daily food can be eaten. In terms of diet, the following points can be paid attention to: 1, to meet the calorie demand, balanced diet: malignant tumor is a wasting di…
Can advanced liver cancer drink green tea?	Liver cancer patients in the diet should try to avoid mildew deterioration, greasy, frying, smoking, pickling, spicy stimulation, too hard easy to scratch the alimentary tract and other food intake, other no clear contraindication, daily food can be eaten. In terms of diet, the following points can be paid attention to: 1, to meet the calorie demand, balanced diet: malignant tumor is a wasting di…
Can you eat mung bean sprouts in late liver cancer	Liver cancer patients in the diet should try to avoid mildew deterioration, greasy, frying, smoking, pickling, spicy stimulation, too hard easy to scratch the alimentary tract and other food intake, other no clear contraindication, daily food can be eaten. In terms of diet, the following points can be paid attention to: 1, to meet the calorie demand, balanced diet: malignant tumor is a wasting di…
Can late liver cancer eat radish?	Liver cancer patients in the diet should try to avoid mildew deterioration, greasy, frying, smoking, pickling, spicy stimulation, too hard easy to scratch the alimentary tract and other food intake, other no clear contraindication, daily food can be eaten. In terms of diet, the following points can be paid attention to: 1, to meet the calorie demand, balanced diet: malignant tumor is a wasting di…
Can advanced liver cancer eat ginseng?	Liver cancer patients in the diet should try to avoid mildew deterioration, greasy, frying, smoking, pickling, spicy stimulation, too hard easy to scratch the alimentary tract and other food intake, other no clear contraindication, daily food can be eaten. In terms of diet, the following points can be paid attention to: 1, to meet the calorie demand, balanced diet: malignant tumor is a wasting di…
Can late liver cancer drink dandelion?	Liver cancer patients in the diet should try to avoid mildew deterioration, greasy, frying, smoking, pickling, spicy stimulation, too hard easy to scratch the alimentary tract and other food intake, other no clear contraindication, daily food can be eaten. In terms of diet, the following points can be paid attention to: 1, to meet the calorie demand, balanced diet: malignant tumor is a wasting di…
Can liver cancer late eat banana	Liver cancer patients in the diet should try to avoid mildew deterioration, greasy, frying, smoking, pickling, spicy stimulation, too hard easy to scratch the alimentary tract and other food intake, other no clear contraindication, daily food can be eaten. In terms of diet, the following points can be paid attention to: 1, to meet the calorie demand, balanced diet: malignant tumor is a wasting di…
Can liver cancer late drink soyabane milk?	Liver cancer patients in the diet should try to avoid mildew deterioration, greasy, frying, smoking, pickling, spicy stimulation, too hard easy to scratch the alimentary tract and other food intake, other no clear contraindication, daily food can be eaten. In terms of diet, the following points can be paid attention to: 1, to meet the calorie demand, balanced diet: malignant tumor is a wasting di…
Liver cancer late can eat eel	Liver cancer patients in the diet should try to avoid mildew deterioration, greasy, frying, smoking, pickling, spicy stimulation, too hard easy to scratch the alimentary tract and other food intake, other no clear contraindication, daily food can be eaten. In terms of diet, the following points can be paid attention to: 1, to meet the calorie demand, balanced diet: malignant tumor is a wasting di…
Liver cancer late can eat big radish?	Liver cancer patients in the diet should try to avoid mildew deterioration, greasy, frying, smoking, pickling, spicy stimulation, too hard easy to scratch the alimentary tract and other food intake, other no clear contraindication, daily food can be eaten. In terms of diet, the following points can be paid attention to: 1, to meet the calorie demand, balanced diet: malignant tumor is a wasting di…
Can liver cancer late eat mango?	Liver cancer patients in the diet should try to avoid mildew deterioration, greasy, frying, smoking, pickling, spicy stimulation, too hard easy to scratch the alimentary tract and other food intake, other no clear contraindication, daily food can be eaten. In terms of diet, the following points can be paid attention to: 1, to meet the calorie demand, balanced diet: malignant tumor is a wasting di…
Can liver cancer eat eel and loach	Liver cancer patients in the diet should try to avoid mildew deterioration, greasy, frying, smoking, pickling, spicy stimulation, too hard easy to scratch the alimentary tract and other food intake, other no clear contraindication, daily food can be eaten. In terms of diet, the following points can be paid attention to: 1, to meet the calorie demand, balanced diet: malignant tumor is a wasting di…
Can liver cancer eat black sesame paste?	Liver cancer patients in the diet should try to avoid mildew deterioration, greasy, frying, smoking, pickling, spicy stimulation, too hard easy to scratch the alimentary tract and other food intake, other no clear contraindication, daily food can be eaten. In terms of diet, the following points can be paid attention to: 1, to meet the calorie demand, balanced diet: malignant tumor is a wasting di…
Can liver cancer eat sweet food?	Liver cancer patients in the diet should try to avoid mildew deterioration, greasy, frying, smoking, pickling, spicy stimulation, too hard easy to scratch the alimentary tract and other food intake, other no clear contraindication, daily food can be eaten. In terms of diet, the following points can be paid attention to: 1, to meet the calorie demand, balanced diet: malignant tumor is a wasting di…
Liver cancer can eat fresh ribs. A: Native chicken and fish?	Liver cancer patients in the diet should try to avoid mildew deterioration, greasy, frying, smoking, pickling, spicy stimulation, too hard easy to scratch the alimentary tract and other food intake, other no clear contraindication, daily food can be eaten. In terms of diet, the following points can be paid attention to: 1, to meet the calorie demand, balanced diet: malignant tumor is a wasting di…
What fruit does liver cancer eat better	Liver cancer patients in the diet should try to avoid mildew deterioration, greasy, frying, smoking, pickling, spicy stimulation, too hard easy to scratch the alimentary tract and other food intake, other no clear contraindication, daily food can be eaten. In terms of diet, the following points can be paid attention to: 1, to meet the calorie demand, balanced diet: malignant tumor is a wasting di…
What vegetable does liver cancer eat	Liver cancer patients in the diet should try to avoid mildew deterioration, greasy, frying, smoking, pickling, spicy stimulation, too hard easy to scratch the alimentary tract and other food intake, other no clear contraindication, daily food can be eaten. In terms of diet, the following points can be paid attention to: 1, to meet the calorie demand, balanced diet: malignant tumor is a wasting di…
What does liver cancer eat good	Liver cancer patients in the diet should try to avoid mildew deterioration, greasy, frying, smoking, pickling, spicy stimulation, too hard easy to scratch the alimentary tract and other food intake, other no clear contraindication, daily food can be eaten. In terms of diet, the following points can be paid attention to: 1, to meet the calorie demand, balanced diet: malignant tumor is a wasting di…
What health care product does liver cancer eat	Liver cancer patients in the diet should try to avoid mildew deterioration, greasy, frying, smoking, pickling, spicy stimulation, too hard easy to scratch the alimentary tract and other food intake, other no clear contraindication, daily food can be eaten. In terms of diet, the following points can be paid attention to: 1, to meet the calorie demand, balanced diet: malignant tumor is a wasting di…
What fruit can liver cancer eat?	Liver cancer patients in the diet should try to avoid mildew deterioration, greasy, frying, smoking, pickling, spicy stimulation, too hard easy to scratch the alimentary tract and other food intake, other no clear contraindication, daily food can be eaten. In terms of diet, the following points can be paid attention to: 1, to meet the calorie demand, balanced diet: malignant tumor is a wasting di…
What thing can liver cancer not eat?	Liver cancer patients in the diet should try to avoid mildew deterioration, greasy, frying, smoking, pickling, spicy stimulation, too hard easy to scratch the alimentary tract and other food intake, other no clear contraindication, daily food can be eaten. In terms of diet, the following points can be paid attention to: 1, to meet the calorie demand, balanced diet: malignant tumor is a wasting di…
What meat can liver cancer eat?	Liver cancer patients in the diet should try to avoid mildew deterioration, greasy, frying, smoking, pickling, spicy stimulation, too hard easy to scratch the alimentary tract and other food intake, other no clear contraindication, daily food can be eaten. In terms of diet, the following points can be paid attention to: 1, to meet the calorie demand, balanced diet: malignant tumor is a wasting di…
What fish can liver cancer eat?	Liver cancer patients in the diet should try to avoid mildew deterioration, greasy, frying, smoking, pickling, spicy stimulation, too hard easy to scratch the alimentary tract and other food intake, other no clear contraindication, daily food can be eaten. In terms of diet, the following points can be paid attention to: 1, to meet the calorie demand, balanced diet: malignant tumor is a wasting di…
What dish can liver cancer eat?	Liver cancer patients in the diet should try to avoid mildew deterioration, greasy, frying, smoking, pickling, spicy stimulation, too hard easy to scratch the alimentary tract and other food intake, other no clear contraindication, daily food can be eaten. In terms of diet, the following points can be paid attention to: 1, to meet the calorie demand, balanced diet: malignant tumor is a wasting di…
Liver cancer suitable to eat what nutritional products?	Liver cancer patients in the diet should try to avoid mildew deterioration, greasy, frying, smoking, pickling, spicy stimulation, too hard easy to scratch the alimentary tract and other food intake, other no clear contraindication, daily food can be eaten. In terms of diet, the following points can be paid attention to: 1, to meet the calorie demand, balanced diet: malignant tumor is a wasting di…
Liver cancer suitable to eat what meat?	Liver cancer patients in the diet should try to avoid mildew deterioration, greasy, frying, smoking, pickling, spicy stimulation, too hard easy to scratch the alimentary tract and other food intake, other no clear contraindication, daily food can be eaten. In terms of diet, the following points can be paid attention to: 1, to meet the calorie demand, balanced diet: malignant tumor is a wasting di…
What should early liver cancer patients eat more?	Liver cancer patients in the diet should try to avoid mildew deterioration, greasy, frying, smoking, pickling, spicy stimulation, too hard easy to scratch the alimentary tract and other food intake, other no clear contraindication, daily food can be eaten. In terms of diet, the following points can be paid attention to: 1, to meet the calorie demand, balanced diet: malignant tumor is a wasting di…
Can the person of liver cancer drink milk?	Liver cancer patients in the diet should try to avoid mildew deterioration, greasy, frying, smoking, pickling, spicy stimulation, too hard easy to scratch the alimentary tract and other food intake, other no clear contraindication, daily food can be eaten. In terms of diet, the following points can be paid attention to: 1, to meet the calorie demand, balanced diet: malignant tumor is a wasting di…
What milk does liver cancer drink to be good to the body	Liver cancer patients in the diet should try to avoid mildew deterioration, greasy, frying, smoking, pickling, spicy stimulation, too hard easy to scratch the alimentary tract and other food intake, other no clear contraindication, daily food can be eaten. In terms of diet, the following points can be paid attention to: 1, to meet the calorie demand, balanced diet: malignant tumor is a wasting di…
Can duck be eaten after early resection of liver cancer?	Liver cancer patients in the diet should try to avoid mildew deterioration, greasy, frying, smoking, pickling, spicy stimulation, too hard easy to scratch the alimentary tract and other food intake, other no clear contraindication, daily food can be eaten. In terms of diet, the following points can be paid attention to: 1, to meet the calorie demand, balanced diet: malignant tumor is a wasting di…
Can primary liver cancer be jealous?	Liver cancer patients in the diet should try to avoid mildew deterioration, greasy, frying, smoking, pickling, spicy stimulation, too hard easy to scratch the alimentary tract and other food intake, other no clear contraindication, daily food can be eaten. In terms of diet, the following points can be paid attention to: 1, to meet the calorie demand, balanced diet: malignant tumor is a wasting di…
Can liver cancer patients drink coffee	Liver cancer patients in the diet should try to avoid mildew deterioration, greasy, frying, smoking, pickling, spicy stimulation, too hard easy to scratch the alimentary tract and other food intake, other no clear contraindication, daily food can be eaten. In terms of diet, the following points can be paid attention to: 1, to meet the calorie demand, balanced diet: malignant tumor is a wasting di…
Can liver cancer patients eat sugar?	Liver cancer patients in the diet should try to avoid mildew deterioration, greasy, frying, smoking, pickling, spicy stimulation, too hard easy to scratch the alimentary tract and other food intake, other no clear contraindication, daily food can be eaten. In terms of diet, the following points can be paid attention to: 1, to meet the calorie demand, balanced diet: malignant tumor is a wasting di…
Liver cancer late can eat seafood?	Liver cancer patients in the diet should try to avoid mildew deterioration, greasy, frying, smoking, pickling, spicy stimulation, too hard easy to scratch the alimentary tract and other food intake, other no clear contraindication, daily food can be eaten. In terms of diet, the following points can be paid attention to: 1, to meet the calorie demand, balanced diet: malignant tumor is a wasting di…
Can liver cancer patients eat tofu?	Liver cancer patients in the diet should try to avoid mildew deterioration, greasy, frying, smoking, pickling, spicy stimulation, too hard easy to scratch the alimentary tract and other food intake, other no clear contraindication, daily food can be eaten. In terms of diet, the following points can be paid attention to: 1, to meet the calorie demand, balanced diet: malignant tumor is a wasting di…
Can liver cancer patients eat hot pot?	Liver cancer patients in the diet should try to avoid mildew deterioration, greasy, frying, smoking, pickling, spicy stimulation, too hard easy to scratch the alimentary tract and other food intake, other no clear contraindication, daily food can be eaten. In terms of diet, the following points can be paid attention to: 1, to meet the calorie demand, balanced diet: malignant tumor is a wasting di…
Can liver cancer patients eat crabs?	Liver cancer patients in the diet should try to avoid mildew deterioration, greasy, frying, smoking, pickling, spicy stimulation, too hard easy to scratch the alimentary tract and other food intake, other no clear contraindication, daily food can be eaten. In terms of diet, the following points can be paid attention to: 1, to meet the calorie demand, balanced diet: malignant tumor is a wasting di…
Can advanced liver cancer patients eat red ginseng?	Liver cancer patients in the diet should try to avoid mildew deterioration, greasy, frying, smoking, pickling, spicy stimulation, too hard easy to scratch the alimentary tract and other food intake, other no clear contraindication, daily food can be eaten. In terms of diet, the following points can be paid attention to: 1, to meet the calorie demand, balanced diet: malignant tumor is a wasting di…
Can liver cancer patients eat sugar?	Liver cancer patients in the diet should try to avoid mildew deterioration, greasy, frying, smoking, pickling, spicy stimulation, too hard easy to scratch the alimentary tract and other food intake, other no clear contraindication, daily food can be eaten. In terms of diet, the following points can be paid attention to: 1, to meet the calorie demand, balanced diet: malignant tumor is a wasting di…
Can liver cancer ascites drink milk?	Liver cancer patients in the diet should try to avoid mildew deterioration, greasy, frying, smoking, pickling, spicy stimulation, too hard easy to scratch the alimentary tract and other food intake, other no clear contraindication, daily food can be eaten. In terms of diet, the following points can be paid attention to: 1, to meet the calorie demand, balanced diet: malignant tumor is a wasting di…
Can late liver cancer drink tea?	Liver cancer patients in the diet should try to avoid mildew deterioration, greasy, frying, smoking, pickling, spicy stimulation, too hard easy to scratch the alimentary tract and other food intake, other no clear contraindication, daily food can be eaten. In terms of diet, the following points can be paid attention to: 1, to meet the calorie demand, balanced diet: malignant tumor is a wasting di…
Can liver cancer egg eat?	Liver cancer patients in the diet should try to avoid mildew deterioration, greasy, frying, smoking, pickling, spicy stimulation, too hard easy to scratch the alimentary tract and other food intake, other no clear contraindication, daily food can be eaten. In terms of diet, the following points can be paid attention to: 1, to meet the calorie demand, balanced diet: malignant tumor is a wasting di…
Can liver cancer patients eat tofu?	Liver cancer patients in the diet should try to avoid mildew deterioration, greasy, frying, smoking, pickling, spicy stimulation, too hard easy to scratch the alimentary tract and other food intake, other no clear contraindication, daily food can be eaten. In terms of diet, the following points can be paid attention to: 1, to meet the calorie demand, balanced diet: malignant tumor is a wasting di…
Can you be jealous after liver cancer surgery?	Liver cancer patients in the diet should try to avoid mildew deterioration, greasy, frying, smoking, pickling, spicy stimulation, too hard easy to scratch the alimentary tract and other food intake, other no clear contraindication, daily food can be eaten. In terms of diet, the following points can be paid attention to: 1, to meet the calorie demand, balanced diet: malignant tumor is a wasting di…
Can liver cancer eat duck eggs?	Liver cancer patients in the diet should try to avoid mildew deterioration, greasy, frying, smoking, pickling, spicy stimulation, too hard easy to scratch the alimentary tract and other food intake, other no clear contraindication, daily food can be eaten. In terms of diet, the following points can be paid attention to: 1, to meet the calorie demand, balanced diet: malignant tumor is a wasting di…
Can liver cancer drink tea?	Liver cancer patients in the diet should try to avoid mildew deterioration, greasy, frying, smoking, pickling, spicy stimulation, too hard easy to scratch the alimentary tract and other food intake, other no clear contraindication, daily food can be eaten. In terms of diet, the following points can be paid attention to: 1, to meet the calorie demand, balanced diet: malignant tumor is a wasting di…
Can liver cancer drink milk?	Liver cancer patients in the diet should try to avoid mildew deterioration, greasy, frying, smoking, pickling, spicy stimulation, too hard easy to scratch the alimentary tract and other food intake, other no clear contraindication, daily food can be eaten. In terms of diet, the following points can be paid attention to: 1, to meet the calorie demand, balanced diet: malignant tumor is a wasting di…
Can liver cancer drink milk?	Liver cancer patients in the diet should try to avoid mildew deterioration, greasy, frying, smoking, pickling, spicy stimulation, too hard easy to scratch the alimentary tract and other food intake, other no clear contraindication, daily food can be eaten. In terms of diet, the following points can be paid attention to: 1, to meet the calorie demand, balanced diet: malignant tumor is a wasting di…
Got liver cancer still can eat soyabean?	Liver cancer patients in the diet should try to avoid mildew deterioration, greasy, frying, smoking, pickling, spicy stimulation, too hard easy to scratch the alimentary tract and other food intake, other no clear contraindication, daily food can be eaten. In terms of diet, the following points can be paid attention to: 1, to meet the calorie demand, balanced diet: malignant tumor is a wasting di…
Got liver cancer still can eat raw peanut?	Liver cancer patients in the diet should try to avoid mildew deterioration, greasy, frying, smoking, pickling, spicy stimulation, too hard easy to scratch the alimentary tract and other food intake, other no clear contraindication, daily food can be eaten. In terms of diet, the following points can be paid attention to: 1, to meet the calorie demand, balanced diet: malignant tumor is a wasting di…
What can the person who got liver cancer eat?	Liver cancer patients in the diet should try to avoid mildew deterioration, greasy, frying, smoking, pickling, spicy stimulation, too hard easy to scratch the alimentary tract and other food intake, other no clear contraindication, daily food can be eaten. In terms of diet, the following points can be paid attention to: 1, to meet the calorie demand, balanced diet: malignant tumor is a wasting di…
Is egg food harmful to liver disease? An old Chinese doctor said that liver disease (liver cancer) can not eat egg food	Liver cancer patients in the diet should try to avoid mildew deterioration, greasy, frying, smoking, pickling, spicy stimulation, too hard easy to scratch the alimentary tract and other food intake, other no clear contraindication, daily food can be eaten. In terms of diet, the following points can be paid attention to: 1, to meet the calorie demand, balanced diet: malignant tumor is a wasting di…
What does the diet of liver cancer pay attention to?	Liver cancer patients in the diet should try to avoid mildew deterioration, greasy, frying, smoking, pickling, spicy stimulation, too hard easy to scratch the alimentary tract and other food intake, other no clear contraindication, daily food can be eaten. In terms of diet, the following points can be paid attention to: 1, to meet the calorie demand, balanced diet: malignant tumor is a wasting di…
Liver cancer eat scorpions into	Liver cancer patients in the diet should try to avoid mildew deterioration, greasy, frying, smoking, pickling, spicy stimulation, too hard easy to scratch the alimentary tract and other food intake, other no clear contraindication, daily food can be eaten. In terms of diet, the following points can be paid attention to: 1, to meet the calorie demand, balanced diet: malignant tumor is a wasting di…
Liver cancer eat papaya good?	Liver cancer patients in the diet should try to avoid mildew deterioration, greasy, frying, smoking, pickling, spicy stimulation, too hard easy to scratch the alimentary tract and other food intake, other no clear contraindication, daily food can be eaten. In terms of diet, the following points can be paid attention to: 1, to meet the calorie demand, balanced diet: malignant tumor is a wasting di…
Liver cancer eat donkey meat good	Liver cancer patients in the diet should try to avoid mildew deterioration, greasy, frying, smoking, pickling, spicy stimulation, too hard easy to scratch the alimentary tract and other food intake, other no clear contraindication, daily food can be eaten. In terms of diet, the following points can be paid attention to: 1, to meet the calorie demand, balanced diet: malignant tumor is a wasting di…
Can you eat seafood after liver cancer surgery?	Liver cancer patients in the diet should try to avoid mildew deterioration, greasy, frying, smoking, pickling, spicy stimulation, too hard easy to scratch the alimentary tract and other food intake, other no clear contraindication, daily food can be eaten. In terms of diet, the following points can be paid attention to: 1, to meet the calorie demand, balanced diet: malignant tumor is a wasting di…
Hear liver cancer patient can eat garlic more, how to eat best?	Liver cancer patients in the diet should try to avoid mildew deterioration, greasy, frying, smoking, pickling, spicy stimulation, too hard easy to scratch the alimentary tract and other food intake, other no clear contraindication, daily food can be eaten. In terms of diet, the following points can be paid attention to: 1, to meet the calorie demand, balanced diet: malignant tumor is a wasting di…
What should be put in the stew pigeon soup for liver cancer patients	Liver cancer patients in the diet should try to avoid mildew deterioration, greasy, frying, smoking, pickling, spicy stimulation, too hard easy to scratch the alimentary tract and other food intake, other no clear contraindication, daily food can be eaten. In terms of diet, the following points can be paid attention to: 1, to meet the calorie demand, balanced diet: malignant tumor is a wasting di…
What should early liver cancer patients eat more?	Liver cancer patients in the diet should try to avoid mildew deterioration, greasy, frying, smoking, pickling, spicy stimulation, too hard easy to scratch the alimentary tract and other food intake, other no clear contraindication, daily food can be eaten. In terms of diet, the following points can be paid attention to: 1, to meet the calorie demand, balanced diet: malignant tumor is a wasting di…
What fruit does liver cancer eat best	Liver cancer patients in the diet should try to avoid mildew deterioration, greasy, frying, smoking, pickling, spicy stimulation, too hard easy to scratch the alimentary tract and other food intake, other no clear contraindication, daily food can be eaten. In terms of diet, the following points can be paid attention to: 1, to meet the calorie demand, balanced diet: malignant tumor is a wasting di…
What soup does liver cancer drink best?	Liver cancer patients in the diet should try to avoid mildew deterioration, greasy, frying, smoking, pickling, spicy stimulation, too hard easy to scratch the alimentary tract and other food intake, other no clear contraindication, daily food can be eaten. In terms of diet, the following points can be paid attention to: 1, to meet the calorie demand, balanced diet: malignant tumor is a wasting di…
What soup is suitable for liver cancer?	Liver cancer patients in the diet should try to avoid mildew deterioration, greasy, frying, smoking, pickling, spicy stimulation, too hard easy to scratch the alimentary tract and other food intake, other no clear contraindication, daily food can be eaten. In terms of diet, the following points can be paid attention to: 1, to meet the calorie demand, balanced diet: malignant tumor is a wasting di…
What food does liver cancer eat best	Liver cancer patients in the diet should try to avoid mildew deterioration, greasy, frying, smoking, pickling, spicy stimulation, too hard easy to scratch the alimentary tract and other food intake, other no clear contraindication, daily food can be eaten. In terms of diet, the following points can be paid attention to: 1, to meet the calorie demand, balanced diet: malignant tumor is a wasting di…
Can the patient of liver cancer eat sauerkraut?	Liver cancer patients in the diet should try to avoid mildew deterioration, greasy, frying, smoking, pickling, spicy stimulation, too hard easy to scratch the alimentary tract and other food intake, other no clear contraindication, daily food can be eaten. In terms of diet, the following points can be paid attention to: 1, to meet the calorie demand, balanced diet: malignant tumor is a wasting di…
Can the patient of liver cancer eat sweet potato?	Liver cancer patients in the diet should try to avoid mildew deterioration, greasy, frying, smoking, pickling, spicy stimulation, too hard easy to scratch the alimentary tract and other food intake, other no clear contraindication, daily food can be eaten. In terms of diet, the following points can be paid attention to: 1, to meet the calorie demand, balanced diet: malignant tumor is a wasting di…
Can you drink crucian fish soup and big bone soup after liver cancer surgery	If patients with liver cancer undergo resection surgery, there is interference to gastrointestinal function. Postoperative diet should pay attention to transitional diet, low-fat and light, eat less and more meals, and avoid the intake of dairy products early to reduce the probability of abdominal distension. After the basic recovery of gastrointestinal function, pay attention to reasonable colpo…
Can you eat shrimp or kelp, laver, scallop after liver cancer surgery	If patients with liver cancer undergo resection surgery, there is interference to gastrointestinal function. Postoperative diet should pay attention to transitional diet, low-fat and light, eat less and more meals, and avoid the intake of dairy products early to reduce the probability of abdominal distension. After the basic recovery of gastrointestinal function, pay attention to reasonable colpo…
Can liver cancer patients eat mutton after surgery?	If patients with liver cancer undergo resection surgery, there is interference to gastrointestinal function. Postoperative diet should pay attention to transitional diet, low-fat and light, eat less and more meals, and avoid the intake of dairy products early to reduce the probability of abdominal distension. After the basic recovery of gastrointestinal function, pay attention to reasonable colpo…
Can you eat ginger after liver cancer surgery?	If patients with liver cancer undergo resection surgery, there is interference to gastrointestinal function. Postoperative diet should pay attention to transitional diet, low-fat and light, eat less and more meals, and avoid the intake of dairy products early to reduce the probability of abdominal distension. After the basic recovery of gastrointestinal function, pay attention to reasonable colpo…
Liver cancer, the intervention done on Monday, what can you eat after liver cancer intervention	If patients with liver cancer undergo resection surgery, there is interference to gastrointestinal function. Postoperative diet should pay attention to transitional diet, low-fat and light, eat less and more meals, and avoid the intake of dairy products early to reduce the probability of abdominal distension. After the basic recovery of gastrointestinal function, pay attention to reasonable colpo…
Liver cancer one to two patients, after surgery can drink pigeon soup, black fish soup?	If patients with liver cancer undergo resection surgery, there is interference to gastrointestinal function. Postoperative diet should pay attention to transitional diet, low-fat and light, eat less and more meals, and avoid the intake of dairy products early to reduce the probability of abdominal distension. After the basic recovery of gastrointestinal function, pay attention to reasonable colpo…
What is good to eat after liver cancer operation for a week	If patients with liver cancer undergo resection surgery, there is interference to gastrointestinal function. Postoperative diet should pay attention to transitional diet, low-fat and light, eat less and more meals, and avoid the intake of dairy products early to reduce the probability of abdominal distension. After the basic recovery of gastrointestinal function, pay attention to reasonable colpo…
What can you eat after liver cancer chemotherapy	There is no obvious contraindication in the diet of patients after chemotherapy, but some patients may have decreased appetite, nausea and vomiting after chemotherapy. Therefore, on the premise of reasonable collocation and balanced nutrition, we can appropriately adjust the taste of food, low-fat and light, eat less and more meals, and try to meet the daily energy and nutritional needs of patien…
What to eat to prevent liver cancer?	At present, there is no definite food to prevent liver cancer, but some foods rich in vitamins, dietary fiber and trace elements can help to enhance the body's immunity, such as carrots, bitter gourd, broccoli, tomatoes, garlic and other vegetables, lemon, kiwi, apples and other fruits. Good work and rest rules, proper exercise, balanced and nutritious dietary intake are important to prevent the …
What is the best anti-liver cancer food	At present, there is no definite food to prevent liver cancer, but some foods rich in vitamins, dietary fiber and trace elements can help to enhance the body's immunity, such as carrots, bitter gourd, broccoli, tomatoes, garlic and other vegetables, lemon, kiwi, apples and other fruits. Good work and rest rules, proper exercise, balanced and nutritious dietary intake are important to prevent the …
What foods can you eat to prevent liver cancer?	At present, there is no definite food to prevent liver cancer, but some foods rich in vitamins, dietary fiber and trace elements can help to enhance the body's immunity, such as carrots, bitter gourd, broccoli, tomatoes, garlic and other vegetables, lemon, kiwi, apples and other fruits. Good work and rest rules, proper exercise, balanced and nutritious dietary intake are important to prevent the …
What food does liver cancer eat to fight cancer?	At present, there is no definite food to prevent liver cancer, but some foods rich in vitamins, dietary fiber and trace elements can help to enhance the body's immunity, such as carrots, bitter gourd, broccoli, tomatoes, garlic and other vegetables, lemon, kiwi, apples and other fruits. Good work and rest rules, proper exercise, balanced and nutritious dietary intake are important to prevent the …
I want to ask if liver cancer can eat oysters really anti-cancer?	At present, there is no definite food to prevent liver cancer, but some foods rich in vitamins, dietary fiber and trace elements can help to enhance the body's immunity, such as carrots, bitter gourd, broccoli, tomatoes, garlic and other vegetables, lemon, kiwi, apples and other fruits. Good work and rest rules, proper exercise, balanced and nutritious dietary intake are important to prevent the …
Will liver hemangioma grow up slowly	Cavernous hemangioma of the liver is the most common benign tumor of the liver. The disease develops slowly and can last for several years to decades. Some factors such as female puberty, steroid hormones, contraceptives and pregnancy can accelerate the growth of hemangioma in some patients. It is recommended to go to a regular hospital for standardized diagnosis and treatment.
Hepatic hemangioma is generally congenital, but it is more common in adults.	Cavernous hemangioma of the liver is the most common benign tumor of the liver. The disease develops slowly and can last for several years to decades. Some factors such as female puberty, steroid hormones, contraceptives and pregnancy can accelerate the growth of hemangioma in some patients. It is recommended to go to a regular hospital for standardized diagnosis and treatment.
Is the incidence of hepatic hemangioma high?	Hepatic cavernous hemangioma is the most common benign liver tumor, with an incidence of 1%-7%, accounting for about 74% of benign liver tumors. It is more common in women and can occur at any age, but it is more common in the age of 30 to 50 years. If this disease is diagnosed, it is recommended to go to a regular hospital for diagnosis and treatment.
Are there many people with hepatic hemangioma	Hepatic cavernous hemangioma is the most common benign liver tumor, with an incidence of 1%-7%, accounting for about 74% of benign liver tumors. It is more common in women and can occur at any age, but it is more common in the age of 30 to 50 years. If this disease is diagnosed, it is recommended to go to a regular hospital for diagnosis and treatment.
Are there many people with liver hemangioma?	Hepatic cavernous hemangioma is the most common benign liver tumor, with an incidence of 1%-7%, accounting for about 74% of benign liver tumors. It is more common in women and can occur at any age, but it is more common in the age of 30 to 50 years. If this disease is diagnosed, it is recommended to go to a regular hospital for diagnosis and treatment.
How many people can get liver hemangioma?	Hepatic cavernous hemangioma is the most common benign liver tumor, with an incidence of 1%-7%, accounting for about 74% of benign liver tumors. It is more common in women and can occur at any age, but it is more common in the age of 30 to 50 years. If this disease is diagnosed, it is recommended to go to a regular hospital for diagnosis and treatment.
Are men more likely to suffer from hepatic hemangioma	Cavernous hemangioma of the liver is the most common benign tumor of the liver. This disease is more common in women, and is related to endocrine factors. It can occur at any age, but it is more common in 30-50 years old. Men still have the possibility of the disease. If the disease is diagnosed, it is recommended to go to a regular hospital for diagnosis and treatment.
Get liver hemangioma how to return a responsibility?	Hepatic cavernous hemangioma is the most common benign tumor of the liver. It is believed that it originates from embryonic vascular hamartoma in the liver. Due to the action of some factors, such as taking steroid hormones, contraceptives and women's pregnancy, it causes tumorlike proliferation and formation. If the diagnosis of this disease is recommended to the regular hospital for diagnosis a…
What is intrahepatic hemangioma	Hepatic cavernous hemangioma is the most common benign tumor of the liver. It is believed that it originates from embryonic vascular hamartoma in the liver. Due to the action of some factors, such as taking steroid hormones, contraceptives and women's pregnancy, it causes tumorlike proliferation and formation. If the diagnosis of this disease is recommended to the regular hospital for diagnosis a…
What is hepatic hemangioma?	Hepatic cavernous hemangioma is the most common benign tumor of the liver. It is believed that it originates from embryonic vascular hamartoma in the liver. Due to the action of some factors, such as taking steroid hormones, contraceptives and women's pregnancy, it causes tumorlike proliferation and formation. If the diagnosis of this disease is recommended to the regular hospital for diagnosis a…
What is intrahepatic hemangioma	Hepatic cavernous hemangioma is the most common benign tumor of the liver. It is believed that it originates from embryonic vascular hamartoma in the liver. Due to the action of some factors, such as taking steroid hormones, contraceptives and women's pregnancy, it causes tumorlike proliferation and formation. If the diagnosis of this disease is recommended to the regular hospital for diagnosis a…
Is hepatic hemangioma a metastatic tumor?	Cavernous hemangioma of the liver is the most common benign tumor of the liver. It is believed to originate from embryonic vascular hamartoma in the liver, which is caused by some factors, such as steroid hormones, contraceptives and pregnancy. The disease is a primary liver tumor, not a metastatic tumor, if the diagnosis of this disease is recommended to the regular hospital for diagnosis and tr…
Do multiple hepatic hemangiomas belong to cancer	Cavernous hemangioma of the liver is the most common benign tumor of the liver. It is believed to originate from embryonic vascular hamartoma in the liver, which is caused by some factors, such as steroid hormones, contraceptives and pregnancy. The disease is a benign liver tumor, not cancer, generally will not be cancerous, if the diagnosis of this disease is recommended to the regular hospital …
Can liver hemangioma change into cancer?	Cavernous hemangioma of the liver is the most common benign tumor of the liver. It is believed to originate from embryonic vascular hamartoma in the liver, which is caused by some factors, such as steroid hormones, contraceptives and pregnancy. The disease is a benign liver tumor, not cancer, generally will not be cancerous, if the diagnosis of this disease is recommended to the regular hospital …
Does the liver hemangioma get worse?	Cavernous hemangioma of the liver is the most common benign tumor of the liver. It is believed to originate from embryonic vascular hamartoma in the liver, which is caused by some factors, such as steroid hormones, contraceptives and pregnancy. The disease is a benign liver tumor, not cancer, generally will not be cancerous, if the diagnosis of this disease is recommended to the regular hospital …
Does hepatic hemangioma have relation with second liver small three Yang?	Hepatic cavernous hemangioma is the most common benign tumor of the liver. It is believed that it originates from congenital abnormal development of peripheral blood vessels in the liver. Due to the action of some factors, such as taking steroid hormones, contraceptives and women's pregnancy, it causes tumorlike hyperplasia and formation. At present, there is a lack of evidence to show that hepat…
Are patients with hepatitis B more likely to get hepatic hemangioma?	Hepatic cavernous hemangioma is the most common benign tumor of the liver. It is believed that it originates from congenital abnormal development of peripheral blood vessels in the liver. Due to the action of some factors, such as taking steroid hormones, contraceptives and women's pregnancy, it causes tumorlike hyperplasia and formation. At present, there is a lack of evidence to show that hepat…
Are patients with hepatitis B more likely to get hepatic hemangioma?	Hepatic cavernous hemangioma is the most common benign tumor of the liver. It is believed that it originates from congenital abnormal development of peripheral blood vessels in the liver. Due to the action of some factors, such as taking steroid hormones, contraceptives and women's pregnancy, it causes tumorlike hyperplasia and formation. At present, there is a lack of evidence to show that hepat…
Does hepatic hemangioma have relation with hepatitis B?	Hepatic cavernous hemangioma is the most common benign tumor of the liver. It is believed that it originates from congenital abnormal development of peripheral blood vessels in the liver. Due to the action of some factors, such as taking steroid hormones, contraceptives and women's pregnancy, it causes tumorlike hyperplasia and formation. At present, there is a lack of evidence to show that hepat…
Can smoking get liver hemangioma?	Hepatic cavernous hemangioma is the most common benign tumor of the liver. It is believed that it originates from congenital abnormal development of peripheral blood vessels in the liver. Due to the action of some factors, such as taking steroid hormones, contraceptives and women's pregnancy, it causes tumorlike hyperplasia and formation. At present, there is a lack of evidence to show that hepat…
Can smoking get liver hemangioma?	Hepatic cavernous hemangioma is the most common benign tumor of the liver. It is believed that it originates from congenital abnormal development of peripheral blood vessels in the liver. Due to the action of some factors, such as taking steroid hormones, contraceptives and women's pregnancy, it causes tumorlike hyperplasia and formation. At present, there is a lack of evidence to show that hepat…
Liver hemangioma, is it angry?	Hepatic cavernous hemangioma is the most common benign tumor of the liver. It is believed that it originates from congenital abnormal development of peripheral blood vessels in the liver. Due to the action of some factors, such as taking steroid hormones, contraceptives and women's pregnancy, it causes tumorlike hyperplasia and formation. At present, there is a lack of evidence to show that hepat…
Is anger easy to get liver hemangioma	Hepatic cavernous hemangioma is the most common benign tumor of the liver. It is believed that it originates from congenital abnormal development of peripheral blood vessels in the liver. Due to the action of some factors, such as taking steroid hormones, contraceptives and women's pregnancy, it causes tumorlike hyperplasia and formation. At present, there is a lack of evidence to show that hepat…
Can liver hemangioma be because eat Chinese medicine?	Hepatic cavernous hemangioma is the most common benign tumor of the liver. It is believed that it originates from congenital abnormal development of peripheral blood vessels in the liver. Due to the action of some factors, such as taking steroid hormones, contraceptives and women's pregnancy, it causes tumorlike hyperplasia and formation. At present, there is a lack of evidence to show that hepat…
Does liver hemangioma have relationship with drinking?	Hepatic cavernous hemangioma is the most common benign tumor of the liver. It is believed that it originates from congenital abnormal development of peripheral blood vessels in the liver. Due to the action of some factors, such as taking steroid hormones, contraceptives and women's pregnancy, it causes tumorlike hyperplasia and formation. At present, there is a lack of evidence to show that hepat…
Can drinking make liver hemangioma bigger	Hepatic cavernous hemangioma is the most common benign tumor of the liver. It is believed that it originates from congenital abnormal development of peripheral blood vessels in the liver. Due to the action of some factors, such as taking steroid hormones, contraceptives and women's pregnancy, it causes tumorlike hyperplasia and formation. At present, there is a lack of evidence to show that hepat…
Why do hemangiomas grow on the liver	Hepatic cavernous hemangioma is the most common benign tumor of the liver. It is believed that it originates from embryonic vascular hamartoma in the liver. Due to the action of some factors, such as taking steroid hormones, contraceptives and women's pregnancy, it causes tumorlike proliferation and formation. If the diagnosis of this disease is recommended to the regular hospital for diagnosis a…
What reason is hepatic hemangioma?	Hepatic cavernous hemangioma is the most common benign tumor of the liver. It is believed that it originates from embryonic vascular hamartoma in the liver. Due to the action of some factors, such as taking steroid hormones, contraceptives and women's pregnancy, it causes tumorlike proliferation and formation. If the diagnosis of this disease is recommended to the regular hospital for diagnosis a…
Why will grow hepatic hemangioma?	Hepatic cavernous hemangioma is the most common benign tumor of the liver. It is believed that it originates from embryonic vascular hamartoma in the liver. Due to the action of some factors, such as taking steroid hormones, contraceptives and women's pregnancy, it causes tumorlike proliferation and formation. If the diagnosis of this disease is recommended to the regular hospital for diagnosis a…
What reason does grow to have liver hemangioma commonly cause?	Hepatic cavernous hemangioma is the most common benign tumor of the liver. It is believed that it originates from embryonic vascular hamartoma in the liver. Due to the action of some factors, such as taking steroid hormones, contraceptives and women's pregnancy, it causes tumorlike proliferation and formation. If the diagnosis of this disease is recommended to the regular hospital for diagnosis a…
Why will grow hepatic hemangioma?	Hepatic cavernous hemangioma is the most common benign tumor of the liver. It is believed that it originates from embryonic vascular hamartoma in the liver. Due to the action of some factors, such as taking steroid hormones, contraceptives and women's pregnancy, it causes tumorlike proliferation and formation. If the diagnosis of this disease is recommended to the regular hospital for diagnosis a…
Why can get liver hemangioma?	Hepatic cavernous hemangioma is the most common benign tumor of the liver. It is believed that it originates from embryonic vascular hamartoma in the liver. Due to the action of some factors, such as taking steroid hormones, contraceptives and women's pregnancy, it causes tumorlike proliferation and formation. If the diagnosis of this disease is recommended to the regular hospital for diagnosis a…
Excuse me doctor liver hemangioma is congenital formed?	Hepatic cavernous hemangioma is the most common benign tumor of the liver. It is believed that it originates from embryonic vascular hamartoma in the liver. Due to the action of some factors, such as taking steroid hormones, contraceptives and women's pregnancy, it causes tumorlike proliferation and formation. If the diagnosis of this disease is recommended to the regular hospital for diagnosis a…
I have a hemangioma on my liver. A: What causes it	Hepatic cavernous hemangioma is the most common benign tumor of the liver. It is believed that it originates from embryonic vascular hamartoma in the liver. Due to the action of some factors, such as taking steroid hormones, contraceptives and women's pregnancy, it causes tumorlike proliferation and formation. If the diagnosis of this disease is recommended to the regular hospital for diagnosis a…
How is hemangioma of the right liver caused	Hepatic cavernous hemangioma is the most common benign tumor of the liver. It is believed that it originates from embryonic vascular hamartoma in the liver. Due to the action of some factors, such as taking steroid hormones, contraceptives and women's pregnancy, it causes tumorlike proliferation and formation. If the diagnosis of this disease is recommended to the regular hospital for diagnosis a…
How is intrahepatic hemangioma caused	Hepatic cavernous hemangioma is the most common benign tumor of the liver. It is believed that it originates from embryonic vascular hamartoma in the liver. Due to the action of some factors, such as taking steroid hormones, contraceptives and women's pregnancy, it causes tumorlike proliferation and formation. If the diagnosis of this disease is recommended to the regular hospital for diagnosis a…
How is hemangioma in the right lobe of the liver caused?	Hepatic cavernous hemangioma is the most common benign tumor of the liver. It is believed that it originates from embryonic vascular hamartoma in the liver. Due to the action of some factors, such as taking steroid hormones, contraceptives and women's pregnancy, it causes tumorlike proliferation and formation. If the diagnosis of this disease is recommended to the regular hospital for diagnosis a…
How is hepatic hemangioma formed?	Hepatic cavernous hemangioma is the most common benign tumor of the liver. It is believed that it originates from embryonic vascular hamartoma in the liver. Due to the action of some factors, such as taking steroid hormones, contraceptives and women's pregnancy, it causes tumorlike proliferation and formation. If the diagnosis of this disease is recommended to the regular hospital for diagnosis a…
Liver hemangioma is generally congenital or acquired, which proportion is more,	Hepatic cavernous hemangioma is the most common benign tumor of the liver. It is believed that it originates from embryonic vascular hamartoma in the liver. Due to the action of some factors, such as taking steroid hormones, contraceptives and women's pregnancy, it causes tumorlike proliferation and formation. If the diagnosis of this disease is recommended to the regular hospital for diagnosis a…
Is hepatic hemangioma congenital?	Hepatic cavernous hemangioma is the most common benign tumor of the liver. It is believed that it originates from embryonic vascular hamartoma in the liver. Due to the action of some factors, such as taking steroid hormones, contraceptives and women's pregnancy, it causes tumorlike proliferation and formation. If the diagnosis of this disease is recommended to the regular hospital for diagnosis a…
How does hepatic hemangioma actually cause	Hepatic cavernous hemangioma is the most common benign tumor of the liver. It is believed that it originates from embryonic vascular hamartoma in the liver. Due to the action of some factors, such as taking steroid hormones, contraceptives and women's pregnancy, it causes tumorlike proliferation and formation. If the diagnosis of this disease is recommended to the regular hospital for diagnosis a…
Liver hemangioma is born or acquired	Hepatic cavernous hemangioma is the most common benign tumor of the liver. It is believed that it originates from embryonic vascular hamartoma in the liver. Due to the action of some factors, such as taking steroid hormones, contraceptives and women's pregnancy, it causes tumorlike proliferation and formation. If the diagnosis of this disease is recommended to the regular hospital for diagnosis a…
What reason is hepatic hemangioma caused	Hepatic cavernous hemangioma is the most common benign tumor of the liver. It is believed that it originates from embryonic vascular hamartoma in the liver. Due to the action of some factors, such as taking steroid hormones, contraceptives and women's pregnancy, it causes tumorlike proliferation and formation. If the diagnosis of this disease is recommended to the regular hospital for diagnosis a…
The etiology of hepatic hemangioma	Hepatic cavernous hemangioma is the most common benign tumor of the liver. It is believed that it originates from embryonic vascular hamartoma in the liver. Due to the action of some factors, such as taking steroid hormones, contraceptives and women's pregnancy, it causes tumorlike proliferation and formation. If the diagnosis of this disease is recommended to the regular hospital for diagnosis a…
What causes hemangioma on the liver?	Hepatic cavernous hemangioma is the most common benign tumor of the liver. It is believed that it originates from embryonic vascular hamartoma in the liver. Due to the action of some factors, such as taking steroid hormones, contraceptives and women's pregnancy, it causes tumorlike proliferation and formation. If the diagnosis of this disease is recommended to the regular hospital for diagnosis a…
What causes hepatic cavernous hemangioma	Hepatic cavernous hemangioma is the most common benign tumor of the liver. It is believed that it originates from embryonic vascular hamartoma in the liver. Due to the action of some factors, such as taking steroid hormones, contraceptives and women's pregnancy, it causes tumorlike proliferation and formation. If the diagnosis of this disease is recommended to the regular hospital for diagnosis a…
What causes hepatic hemangioma	Hepatic cavernous hemangioma is the most common benign tumor of the liver. It is believed that it originates from embryonic vascular hamartoma in the liver. Due to the action of some factors, such as taking steroid hormones, contraceptives and women's pregnancy, it causes tumorlike proliferation and formation. If the diagnosis of this disease is recommended to the regular hospital for diagnosis a…
What causes the formation of a long hepatic hemangioma?	Hepatic cavernous hemangioma is the most common benign tumor of the liver. It is believed that it originates from embryonic vascular hamartoma in the liver. Due to the action of some factors, such as taking steroid hormones, contraceptives and women's pregnancy, it causes tumorlike proliferation and formation. If the diagnosis of this disease is recommended to the regular hospital for diagnosis a…
Causes of hemangioma in the right hepatic lobe?	Hepatic cavernous hemangioma is the most common benign tumor of the liver. It is believed that it originates from embryonic vascular hamartoma in the liver. Due to the action of some factors, such as taking steroid hormones, contraceptives and women's pregnancy, it causes tumorlike proliferation and formation. If the diagnosis of this disease is recommended to the regular hospital for diagnosis a…
What causes hemangioma in right lobe of liver?	Hepatic cavernous hemangioma is the most common benign tumor of the liver. It is believed that it originates from embryonic vascular hamartoma in the liver. Due to the action of some factors, such as taking steroid hormones, contraceptives and women's pregnancy, it causes tumorlike proliferation and formation. If the diagnosis of this disease is recommended to the regular hospital for diagnosis a…
What is the cause of hepatic hemangioma?	Hepatic cavernous hemangioma is the most common benign tumor of the liver. It is believed that it originates from embryonic vascular hamartoma in the liver. Due to the action of some factors, such as taking steroid hormones, contraceptives and women's pregnancy, it causes tumorlike proliferation and formation. If the diagnosis of this disease is recommended to the regular hospital for diagnosis a…
Why do you get right hepatic hemangioma?	Hepatic cavernous hemangioma is the most common benign tumor of the liver. It is believed that it originates from embryonic vascular hamartoma in the liver. Due to the action of some factors, such as taking steroid hormones, contraceptives and women's pregnancy, it causes tumorlike proliferation and formation. If the diagnosis of this disease is recommended to the regular hospital for diagnosis a…
Why can suffer from liver hemangioma?	Hepatic cavernous hemangioma is the most common benign tumor of the liver. It is believed that it originates from embryonic vascular hamartoma in the liver. Due to the action of some factors, such as taking steroid hormones, contraceptives and women's pregnancy, it causes tumorlike proliferation and formation. If the diagnosis of this disease is recommended to the regular hospital for diagnosis a…
Why will grow to have liver hemangioma?	Hepatic cavernous hemangioma is the most common benign tumor of the liver. It is believed that it originates from embryonic vascular hamartoma in the liver. Due to the action of some factors, such as taking steroid hormones, contraceptives and women's pregnancy, it causes tumorlike proliferation and formation. If the diagnosis of this disease is recommended to the regular hospital for diagnosis a…
Can cholangiocarcinoma recur after 5 years without recurrence	Just because someone doesn't have a recurrence of cholangiocarcinoma five years after surgery doesn't mean they won't come back later. Cholangiocarcinoma is a highly malignant tumor. Even if radical resection is performed, there is still a possibility of recurrence. Regular follow-up observation should be performed after operation, but the follow-up interval can be extended appropriately compared…
Fatty liver and hepatic hemangioma	Fatty liver refers to the lesions caused by excessive fat accumulation in liver cells due to various reasons. According to the etiology, it can be divided into obese fatty liver, alcoholic fatty liver, rapid weight loss fatty liver, dystrophic fatty liver, diabetic fatty liver, etc. Generally speaking, fatty liver is a reversible disease, early diagnosis and timely treatment can often return to n…
Fatty liver and hepatic hemangioma	Fatty liver refers to the lesions caused by excessive fat accumulation in liver cells due to various reasons. According to the etiology, it can be divided into obese fatty liver, alcoholic fatty liver, rapid weight loss fatty liver, dystrophic fatty liver, diabetic fatty liver, etc. Generally speaking, fatty liver is a reversible disease, early diagnosis and timely treatment can often return to n…
What is fatty liver and hepatic hemangioma?	Fatty liver refers to the lesions caused by excessive fat accumulation in liver cells due to various reasons. According to the etiology, it can be divided into obese fatty liver, alcoholic fatty liver, rapid weight loss fatty liver, dystrophic fatty liver, diabetic fatty liver, etc. Generally speaking, fatty liver is a reversible disease, early diagnosis and timely treatment can often return to n…
What is fatty liver and hepatic hemangioma?	Fatty liver refers to the lesions caused by excessive fat accumulation in liver cells due to various reasons. According to the etiology, it can be divided into obese fatty liver, alcoholic fatty liver, rapid weight loss fatty liver, dystrophic fatty liver, diabetic fatty liver, etc. Generally speaking, fatty liver is a reversible disease, early diagnosis and timely treatment can often return to n…
Can fatty liver cause hepatic hemangioma	Fatty liver refers to the lesions caused by excessive fat accumulation in liver cells due to various reasons. According to the etiology, it can be divided into obese fatty liver, alcoholic fatty liver, rapid weight loss fatty liver, dystrophic fatty liver, diabetic fatty liver, etc. Generally speaking, fatty liver is a reversible disease, early diagnosis and timely treatment can often return to n…
I have fatty liver liver hemangioma serious?	Fatty liver refers to the lesions caused by excessive fat accumulation in liver cells due to various reasons. According to the etiology, it can be divided into obese fatty liver, alcoholic fatty liver, rapid weight loss fatty liver, dystrophic fatty liver, diabetic fatty liver, etc. Generally speaking, fatty liver is a reversible disease, early diagnosis and timely treatment can often return to n…
Will I get cirrhosis after minimally invasive surgery for hepatic hemangioma?	Hepatic cavernous hemangioma is the most common benign tumor of the liver. It is believed to originate from embryonic vascular hamartoma in the liver, which is caused by some factors, such as steroid hormones, contraceptive pills and pregnancy. Liver resection is the most effective method for the treatment of hepatic cavernous hemangioma. Recurrence after resection is common, and the main reason …
Will I get cirrhosis after minimally invasive surgery for hepatic hemangioma?	Hepatic cavernous hemangioma is the most common benign tumor of the liver. It is believed to originate from embryonic vascular hamartoma in the liver, which is caused by some factors, such as steroid hormones, contraceptive pills and pregnancy. Liver resection is the most effective method for the treatment of hepatic cavernous hemangioma. Recurrence after resection is common, and the main reason …
Does the physical examination of liver hemangioma lead to liver cirrhosis?	Hepatic cavernous hemangioma is the most common benign tumor of the liver. It is believed to originate from embryonic vascular hamartoma in the liver, which is caused by some factors, such as steroid hormones, contraceptives and pregnancy. The enlargement of spleen is the main manifestation of splenic diseases. It can be divided into infectious splenomegaly and non-infectious splenomegaly. Liver …
Does it matter if a hemangioma grows on the liver	Hepatic cavernous hemangioma is the most common benign tumor of the liver. Small asymptomatic hepatic hemangioma does not need treatment, but B-ultrasound examination should be performed every 3 to 6 months to observe the tumor changes dynamically. Surgical resection should be performed in patients with a diameter greater than 10cm, the possibility of traumatic rupture and massive hemorrhage, or …
Has a hemangioma grown on the liver been serious?	Hepatic cavernous hemangioma is the most common benign tumor of the liver. Small asymptomatic hepatic hemangioma does not need treatment, but B-ultrasound examination should be performed every 3 to 6 months to observe the tumor changes dynamically. Surgical resection should be performed in patients with a diameter greater than 10cm, the possibility of traumatic rupture and massive hemorrhage, or …
Is hepatic hemangioma serious?	Hepatic cavernous hemangioma is the most common benign tumor of the liver. Small asymptomatic hepatic hemangioma does not need treatment, but B-ultrasound examination should be performed every 3 to 6 months to observe the tumor changes dynamically. Surgical resection should be performed in patients with a diameter greater than 10cm, the possibility of traumatic rupture and massive hemorrhage, or …
Is hepatic hemangioma scary?	Hepatic cavernous hemangioma is the most common benign tumor of the liver. Small asymptomatic hepatic hemangioma does not need treatment, but B-ultrasound examination should be performed every 3 to 6 months to observe the tumor changes dynamically. Surgical resection should be performed in patients with a diameter greater than 10cm, the possibility of traumatic rupture and massive hemorrhage, or …
Is there a risk of hemangioma on the liver?	Hepatic cavernous hemangioma is the most common benign tumor of the liver. Small asymptomatic hepatic hemangioma does not need treatment, but B-ultrasound examination should be performed every 3 to 6 months to observe the tumor changes dynamically. Surgical resection should be performed in patients with a diameter greater than 10cm, the possibility of traumatic rupture and massive hemorrhage, or …
Can liver hemangioma be a soldier	It is recommended to consult the local conscription office and conscription physical examination standards. Hepatic cavernous hemangioma is the most common benign tumor of the liver. Small asymptomatic hepatic hemangioma does not require treatment, but B-ultrasound examination should be performed every 3 to 6 months to observe the tumor changes dynamically. Surgical resection should be performed …
Why does hepatic hemangioma recur after surgical resection	Cavernous hemangioma of the liver is the most common benign tumor of the liver. Liver resection is the most effective treatment for cavernous hemangioma of the liver. After recurrence, reoperation or radiotherapy or local injection sclerotherapy can be performed. If this disease is diagnosed, it is recommended to go to a regular hospital for diagnosis and treatment.
Guangxi which hospital liver hemangioma specialist is good	Hepatic cavernous hemangioma is the most common benign tumor of the liver. Small asymptomatic hepatic hemangioma does not need treatment, but B-ultrasound examination should be performed every 3 to 6 months to dynamically observe the changes of the tumor. Surgical resection should be performed in patients with a diameter greater than 10cm, the possibility of traumatic rupture and massive hemorrha…
Are there big three positive and liver hemangioma serious	Hepatic cavernous hemangioma is the most common liver benign tumor, hepatitis B big three positive refers to chronic hepatitis B patients or hepatitis B virus carriers in the body of the immune indicators of hepatitis B virus: namely hepatitis B surface antigen (HBsAg), hepatitis Be antigen (HBeAb), hepatitis B core antibody (anti-HBc) three positive. Small asymptomatic hepatic hemangioma does no…
Can 10MMX10MM liver hemangioma be cured	Hepatic cavernous hemangioma is the most common benign tumor of the liver. Small asymptomatic hepatic hemangioma does not need treatment, but B-ultrasound examination should be performed every 3 to 6 months to observe the tumor changes dynamically. Surgical resection should be performed in patients with a diameter greater than 10cm, the possibility of traumatic rupture and massive hemorrhage, or …
Is liver hemangioma dangerous in adults	Hepatic cavernous hemangioma is the most common benign tumor of the liver. Small asymptomatic hepatic hemangioma does not need treatment, but B-ultrasound examination should be performed every 3 to 6 months to observe the tumor changes dynamically. Surgical resection should be performed in patients with a diameter greater than 10cm, the possibility of traumatic rupture and massive hemorrhage, or …
Got liver hemangioma how to do?	Hepatic cavernous hemangioma is the most common benign tumor of the liver. Small asymptomatic hepatic hemangioma does not need treatment, but B-ultrasound examination should be performed every 3 to 6 months to observe the tumor changes dynamically. Surgical resection should be performed in patients with a diameter greater than 10cm, the possibility of traumatic rupture and massive hemorrhage, or …
Does hepatic cavernous hemangioma matter?	Hepatic cavernous hemangioma is the most common benign tumor of the liver. Small asymptomatic hepatic hemangioma does not need treatment, but B-ultrasound examination should be performed every 3 to 6 months to observe the tumor changes dynamically. Surgical resection should be performed in patients with a diameter greater than 10cm, the possibility of traumatic rupture and massive hemorrhage, or …
How does hemangioma do inside liver	Hepatic cavernous hemangioma is the most common benign tumor of the liver. Small asymptomatic hepatic hemangioma does not need treatment, but B-ultrasound examination should be performed every 3 to 6 months to observe the tumor changes dynamically. Surgical resection should be performed in patients with a diameter greater than 10cm, the possibility of traumatic rupture and massive hemorrhage, or …
How to do with small hemangioma on liver?	Hepatic cavernous hemangioma is the most common benign tumor of the liver. Small asymptomatic hepatic hemangioma does not need treatment, but B-ultrasound examination should be performed every 3 to 6 months to observe the tumor changes dynamically. Surgical resection should be performed in patients with a diameter greater than 10cm, the possibility of traumatic rupture and massive hemorrhage, or …
Is there a hemangioma on the liver serious	Hepatic cavernous hemangioma is the most common benign tumor of the liver. Small asymptomatic hepatic hemangioma does not need treatment, but B-ultrasound examination should be performed every 3 to 6 months to observe the tumor changes dynamically. Surgical resection should be performed in patients with a diameter greater than 10cm, the possibility of traumatic rupture and massive hemorrhage, or …
How does hepatic hemangioma cure fast	Hepatic cavernous hemangioma is the most common benign tumor of the liver. Small asymptomatic hepatic hemangioma does not need treatment, but B-ultrasound examination should be performed every 3 to 6 months to observe the tumor changes dynamically. Surgical resection should be performed in patients with a diameter greater than 10cm, the possibility of traumatic rupture and massive hemorrhage, or …
Is hepatic vascular tumor serious	Hepatic cavernous hemangioma is the most common benign tumor of the liver. Small asymptomatic hepatic hemangioma does not need treatment, but B-ultrasound examination should be performed every 3 to 6 months to observe the tumor changes dynamically. Surgical resection should be performed in patients with a diameter greater than 10cm, the possibility of traumatic rupture and massive hemorrhage, or …
Is hepatic hemangioma scary?	Hepatic cavernous hemangioma is the most common benign tumor of the liver. Small asymptomatic hepatic hemangioma does not need treatment, but B-ultrasound examination should be performed every 3 to 6 months to observe the tumor changes dynamically. Surgical resection should be performed in patients with a diameter greater than 10cm, the possibility of traumatic rupture and massive hemorrhage, or …
How to do hemangioma on the right liver?	Hepatic cavernous hemangioma is the most common benign tumor of the liver. Small asymptomatic hepatic hemangioma does not need treatment, but B-ultrasound examination should be performed every 3 to 6 months to observe the tumor changes dynamically. Surgical resection should be performed in patients with a diameter greater than 10cm, the possibility of traumatic rupture and massive hemorrhage, or …
How to deal with right hepatic hemangioma	Hepatic cavernous hemangioma is the most common benign tumor of the liver. Small asymptomatic hepatic hemangioma does not need treatment, but B-ultrasound examination should be performed every 3 to 6 months to observe the tumor changes dynamically. Surgical resection should be performed in patients with a diameter greater than 10cm, the possibility of traumatic rupture and massive hemorrhage, or …
How to deal with right hepatic hemangioma	Hepatic cavernous hemangioma is the most common benign tumor of the liver. Small asymptomatic hepatic hemangioma does not need treatment, but B-ultrasound examination should be performed every 3 to 6 months to observe the tumor changes dynamically. Surgical resection should be performed in patients with a diameter greater than 10cm, the possibility of traumatic rupture and massive hemorrhage, or …
How does right liver have hemangioma do	Hepatic cavernous hemangioma is the most common benign tumor of the liver. Small asymptomatic hepatic hemangioma does not need treatment, but B-ultrasound examination should be performed every 3 to 6 months to observe the tumor changes dynamically. Surgical resection should be performed in patients with a diameter greater than 10cm, the possibility of traumatic rupture and massive hemorrhage, or …
What is hepatic hemangioma to return a responsibility?	Hepatic cavernous hemangioma is the most common benign tumor of the liver. It is believed that it originates from embryonic vascular hamartoma in the liver. Due to the action of some factors, such as taking steroid hormones, contraceptives and women's pregnancy, it causes tumorlike proliferation and formation. If the diagnosis of this disease is recommended to the regular hospital for diagnosis a…
Introduction and treatment of hepatic hemangioma in the right posterior lobe	Cavernous hemangioma of the liver is the most common benign tumor of the liver. It is believed to originate from embryonic vascular hamartoma in the liver, which is caused by some factors, such as steroid hormones, contraceptives and pregnancy. This disease is more common in women and can occur at any age, but it is more common in the age of 30-50 years. The tumor may be asymptomatic when it is s…
Can liver hemangioma be cured completely?	Hepatic cavernous hemangioma is the most common benign tumor of the liver. Generally, it will not disappear automatically. Small asymptomatic hepatic hemangioma does not need treatment, but B-ultrasound should be performed every 3 to 6 months to dynamically observe the changes of the tumor. Surgical resection should be performed in patients with a diameter greater than 10cm, the possibility of tr…
Can hepatic hemangioma be cured?	Hepatic cavernous hemangioma is the most common benign tumor of the liver. Generally, it will not disappear automatically. Small asymptomatic hepatic hemangioma does not need treatment, but B-ultrasound should be performed every 3 to 6 months to dynamically observe the changes of the tumor. Surgical resection should be performed in patients with a diameter greater than 10cm, the possibility of tr…
Can liver hemangioma cure completely?	Hepatic cavernous hemangioma is the most common benign tumor of the liver. Generally, it will not disappear automatically. Small asymptomatic hepatic hemangioma does not need treatment, but B-ultrasound should be performed every 3 to 6 months to dynamically observe the changes of the tumor. Surgical resection should be performed in patients with a diameter greater than 10cm, the possibility of tr…
Can hepatic hemangioma be cured completely?	Hepatic cavernous hemangioma is the most common benign tumor of the liver. Generally, it will not disappear automatically. Small asymptomatic hepatic hemangioma does not need treatment, but B-ultrasound should be performed every 3 to 6 months to dynamically observe the changes of the tumor. Surgical resection should be performed in patients with a diameter greater than 10cm, the possibility of tr…
Can advanced hepatic hemangioma be cured	Hepatic cavernous hemangioma is the most common benign tumor of the liver. Generally, it will not disappear automatically. Small asymptomatic hepatic hemangioma does not need treatment, but B-ultrasound should be performed every 3 to 6 months to dynamically observe the changes of the tumor. Surgical resection should be performed in patients with a diameter greater than 10cm, the possibility of tr…
Will the suprahepatic hemangioma disappear?	Hepatic cavernous hemangioma is the most common benign tumor of the liver. Generally, it will not disappear automatically. Small asymptomatic hepatic hemangioma does not need treatment, but B-ultrasound should be performed every 3 to 6 months to dynamically observe the changes of the tumor. Surgical resection should be performed in patients with a diameter greater than 10cm, the possibility of tr…
Will the hemangioma in the right hepatic lobe go away	Hepatic cavernous hemangioma is the most common benign tumor of the liver. Generally, it will not disappear automatically. Small asymptomatic hepatic hemangioma does not need treatment, but B-ultrasound should be performed every 3 to 6 months to dynamically observe the changes of the tumor. Surgical resection should be performed in patients with a diameter greater than 10cm, the possibility of tr…
Got gallstone liver hemangioma serious?	Cholelithiasis refers to the biliary system including gallbladder or bile duct stone disease, stone formation in the gallbladder, can stimulate the gallbladder mucosa, not only can cause chronic inflammation of the gallbladder, and when the stone incarcerated in the neck of the gallbladder or gallbladder duct, can also cause secondary infection, leading to acute inflammation of the gallbladder. D…
Can cholelithiasis be cancerous	Chronic cholecystitis and gallstones are the causes of gallbladder cancer. The gallbladder is stimulated by chronic inflammation and bile acid and choline in gallstones for a long time, which is easy to cause gallbladder mucosa cancer. However, not all gallstones will become cancerous, and the incidence is not high. However, with gallstones, it is still necessary to take active anti-inflammatory …
Can hepatoblastoma be cured early?	Hepatoblastoma is a malignant embryonal tumor with a variety of differentiation patterns. It is composed of cells similar to fetal epithelial hepatocytes, embryonal cells and differentiated mesenchymal elements. Most hepatoblastoma is a solitary tumor, and its cure rate is low. Surgical resection is the first choice of treatment for hepatoblastoma. Ultrasound ablation combined with surgical resec…
Can hepatolithiasis be misdiagnosed as hemangioma?	Hepatolithiasis is not usually misdiagnosed as hemangioma. B-ultrasound is the preferred method for the diagnosis of intrahepatic bile duct stones, and the diagnostic accuracy is generally estimated to be 50%-70%. The ultrasonic image of intrahepatic bile duct stones varies greatly, and generally requires dilatation of the bile duct at the distal end of the stone to make the diagnosis of intrahep…
Multiple cavernous hemangiomas in the liver?	Cavernous hemangioma of the liver is the most common benign tumor of the liver. It is believed to originate from embryonic vascular hamartoma in the liver, which is caused by some factors, such as steroid hormones, contraceptives and pregnancy. This disease is more common in women and can occur at any age, but it is more common in the age of 30-50 years. The tumor may be asymptomatic when it is s…
Intrahepatic hemangioma does not affect the employment of civil servants	It is recommended to consult the relevant units and legal provisions. Hepatic cavernous hemangioma is the most common benign tumor of the liver. Small asymptomatic hepatic hemangioma does not need treatment, but B-ultrasound examination should be performed every 3 to 6 months to observe the tumor changes dynamically. Surgical resection should be performed in patients with a diameter greater than …
What is the regulation of hepatic hemangioma in civil servant's admission physical examination	It is recommended to consult the relevant units and legal provisions. Hepatic cavernous hemangioma is the most common benign tumor of the liver. Small asymptomatic hepatic hemangioma does not need treatment, but B-ultrasound examination should be performed every 3 to 6 months to observe the tumor changes dynamically. Surgical resection should be performed in patients with a diameter greater than …
Can blood be donated for hepatic hemangioma	Hepatic cavernous hemangioma is the most common benign tumor of the liver. Small asymptomatic hepatic hemangioma does not need treatment, but B-ultrasound examination should be performed every 3 to 6 months to observe the tumor changes dynamically. Surgical resection should be performed in patients with a diameter greater than 10cm, the possibility of traumatic rupture and massive hemorrhage, or …
Precautions for hemangioma on the liver	Hepatic cavernous hemangioma is the most common benign tumor of the liver. Small asymptomatic hepatic hemangioma does not require treatment, but B-ultrasound examination should be performed every 3 to 6 months to observe the tumor changes dynamically. Surgical resection should be performed in patients with a diameter greater than 10cm, the possibility of traumatic rupture and massive hemorrhage, …
Liver hemangioma, the growth rate is not a little fast	Hepatic cavernous hemangioma is the most common benign tumor of the liver. It develops slowly and has a good prognosis, but pregnancy can cause the tumor to grow rapidly, which may increase the possibility of spontaneous rupture in the event of an accidental pregnancy or the increase in abdominal pressure during labor. Recurrence of hepatic cavernous hemangioma after resection is common. The main…
Liver hemangioma hang which department, liver hemangioma hang which department?	Hepatic cavernous hemangioma is the most common benign tumor of the liver. Small asymptomatic hepatic hemangioma does not need treatment, but B-ultrasound should be performed every 3 to 6 months to dynamically observe the changes of the tumor. Surgical resection should be performed in patients with a diameter greater than 10cm, the possibility of traumatic rupture and massive hemorrhage, or the t…
Which department does liver hemangioma hang?	Hepatic cavernous hemangioma is the most common benign tumor of the liver. Small asymptomatic hepatic hemangioma does not need treatment, but B-ultrasound should be performed every 3 to 6 months to dynamically observe the changes of the tumor. Surgical resection should be performed in patients with a diameter greater than 10cm, the possibility of traumatic rupture and massive hemorrhage, or the t…
Physical examination said that there may be liver hemangioma, think of the hospital diagnosis. What department should register to hang	Hepatic cavernous hemangioma is the most common benign tumor of the liver. Small asymptomatic hepatic hemangioma does not need treatment, but B-ultrasound should be performed every 3 to 6 months to dynamically observe the changes of the tumor. Surgical resection should be performed in patients with a diameter greater than 10cm, the possibility of traumatic rupture and massive hemorrhage, or the t…
Why does hepatic hemangioma sometimes see sometimes not see	Hepatic cavernous hemangioma is the most common benign tumor of the liver. Small asymptomatic hepatic hemangioma does not require treatment, but B-ultrasound examination should be performed every 3 to 6 months to observe the tumor changes dynamically. Surgical resection should be performed in patients with a diameter greater than 10cm, the possibility of traumatic rupture and massive hemorrhage, …
Where is the best hospital to see liver hemangioma in Nanjing Jiangsu	Cavernous hemangioma of the liver is the most common benign tumor of the liver. Small asymptomatic hepatic hemangioma does not require treatment, but B-ultrasound should be performed every 3 to 6 months to dynamically observe the changes of the tumor. Surgical resection should be performed in patients with a diameter greater than 10cm, the possibility of traumatic rupture and massive hemorrhage, …
Calcification of bile ducts in the liver of small hemangioma	Small hemangiomas of the liver, less than 5 cm in diameter, have no obvious symptoms and do not require surgical treatment and other treatment. Regular reexamination is necessary to see whether they have grown up. In the process of reexamination, it is found that the small hemangioma grows faster, more than 5 cm can be considered surgery or interventional treatment, such as intrahepatic bile duct…
Calcification of bile ducts in the liver of small hemangioma	Small hemangiomas of the liver, less than 5 cm in diameter, have no obvious symptoms and do not require surgical treatment and other treatment. Regular reexamination is necessary to see whether they have grown up. In the process of reexamination, it is found that the small hemangioma grows faster, more than 5 cm can be considered surgery or interventional treatment, such as intrahepatic bile duct…
How does doctor say many people have liver hemangioma?	Hepatic cavernous hemangioma is the most common benign tumor of the liver. It is believed that it originates from embryonic vascular hamartoma in the liver, which is caused by some factors, such as taking steroid hormones, contraceptives and women's pregnancy. The incidence of hepatic cavernous hemangioma is 1%-7%, accounting for about 74% of benign liver tumors. The disease is more common in wom…
Pain symptoms of hepatic hemangioma?	Hepatic cavernous hemangioma is the most common benign tumor of the liver. When the tumor is small, it may be asymptomatic and more often found during physical examination. When the tumor gradually enlarges, the main manifestations are hepatomegaly or compression of adjacent organs such as stomach and intestine, causing upper abdominal discomfort, abdominal distension, abdominal pain, loss of app…
What are the symptoms of liver hemangioma?	Hepatic cavernous hemangioma is the most common benign tumor of the liver. When the tumor is small, it may be asymptomatic and more often found during physical examination. When the tumor gradually enlarges, the main manifestations are hepatomegaly or compression of adjacent organs such as stomach and intestine, causing upper abdominal discomfort, abdominal distension, abdominal pain, loss of app…
What symptom does hepatic hemangioma have?	Hepatic cavernous hemangioma is the most common benign tumor of the liver. When the tumor is small, it may be asymptomatic and more often found during physical examination. When the tumor gradually enlarges, the main manifestations are hepatomegaly or compression of adjacent organs such as stomach and intestine, causing upper abdominal discomfort, abdominal distension, abdominal pain, loss of app…
How does liver hemangioma pain do?	Hepatic cavernous hemangioma is the most common benign tumor of the liver. When the tumor is small, it may be asymptomatic and more often found during physical examination. When the tumor gradually enlarges, the main manifestations are hepatomegaly or compression of adjacent organs such as stomach and intestine, causing upper abdominal discomfort, abdominal distension, abdominal pain, loss of app…
Pain under the right rib, preliminary examination is hepatic hemangioma	Hepatic cavernous hemangioma is the most common benign tumor of the liver. When the tumor is small, it may be asymptomatic and more often found during physical examination. When the tumor gradually enlarges, the main manifestations are hepatomegaly or compression of adjacent organs such as stomach and intestine, causing upper abdominal discomfort, abdominal distension, abdominal pain, loss of app…
Is the pain in the ribs at the back of the right liver region related to hepatic hemangioma	Hepatic cavernous hemangioma is the most common benign tumor of the liver. When the tumor is small, it may be asymptomatic and more often found during physical examination. When the tumor gradually enlarges, the main manifestations are hepatomegaly or compression of adjacent organs such as stomach and intestine, causing upper abdominal discomfort, abdominal distension, abdominal pain, loss of app…
Does a benign tumor on the liver hurt	Hepatic cavernous hemangioma is the most common benign tumor of the liver. When the tumor is small, it may be asymptomatic and more often found during physical examination. When the tumor gradually enlarges, the main manifestations are hepatomegaly or compression of adjacent organs such as stomach and intestine, causing upper abdominal discomfort, abdominal distension, abdominal pain, loss of app…
I got liver hemangioma, liver area pain can pain	Hepatic cavernous hemangioma is the most common benign tumor of the liver. When the tumor is small, it may be asymptomatic and more often found during physical examination. When the tumor gradually enlarges, the main manifestations are hepatomegaly or compression of adjacent organs such as stomach and intestine, causing upper abdominal discomfort, abdominal distension, abdominal pain, loss of app…
I got liver hemangioma, liver area pain can pain	Hepatic cavernous hemangioma is the most common benign tumor of the liver. When the tumor is small, it may be asymptomatic and more often found during physical examination. When the tumor gradually enlarges, the main manifestations are hepatomegaly or compression of adjacent organs such as stomach and intestine, causing upper abdominal discomfort, abdominal distension, abdominal pain, loss of app…
Why does hepatic hemangioma ache?	Hepatic cavernous hemangioma is the most common benign tumor of the liver. When the tumor is small, it may be asymptomatic and more often found during physical examination. When the tumor gradually enlarges, the main manifestations are hepatomegaly or compression of adjacent organs such as stomach and intestine, causing upper abdominal discomfort, abdominal distension, abdominal pain, loss of app…
Does a small hepatic hemangioma cause pain in the liver region?	Hepatic cavernous hemangioma is the most common benign tumor of the liver. When the tumor is small, it may be asymptomatic and more often found during physical examination. When the tumor gradually enlarges, the main manifestations are hepatomegaly or compression of adjacent organs such as stomach and intestine, causing upper abdominal discomfort, abdominal distension, abdominal pain, loss of app…
If liver hemangioma sometimes nausea and vomiting is it related to him or with the stomach	Hepatic cavernous hemangioma is the most common benign tumor of the liver. When the tumor is small, it may be asymptomatic and more often found during physical examination. When the tumor gradually enlarges, the main manifestations are hepatomegaly or compression of adjacent organs such as stomach and intestine, causing upper abdominal discomfort, abdominal distension, abdominal pain, loss of app…
Why does hepatic hemangioma sometimes hurt	Hepatic cavernous hemangioma is the most common benign tumor of the liver. When the tumor is small, it may be asymptomatic and more often found during physical examination. When the tumor gradually enlarges, the main manifestations are hepatomegaly or compression of adjacent organs such as stomach and intestine, causing upper abdominal discomfort, abdominal distension, abdominal pain, loss of app…
Grew a hemangioma on liver, liver faint do pain recently, excuse me what is this	Hepatic cavernous hemangioma is the most common benign tumor of the liver. When the tumor is small, it may be asymptomatic and more often found during physical examination. When the tumor gradually enlarges, the main manifestations are hepatomegaly or compression of adjacent organs such as stomach and intestine, causing upper abdominal discomfort, abdominal distension, abdominal pain, loss of app…
Does hepatic hemangioma hurt?	Hepatic cavernous hemangioma is the most common benign tumor of the liver. When the tumor is small, it may be asymptomatic and more often found during physical examination. When the tumor gradually enlarges, the main manifestations are hepatomegaly or compression of adjacent organs such as stomach and intestine, causing upper abdominal discomfort, abdominal distension, abdominal pain, loss of app…
Does hepatic hemangioma ache faintly?	Hepatic cavernous hemangioma is the most common benign tumor of the liver. When the tumor is small, it may be asymptomatic and more often found during physical examination. When the tumor gradually enlarges, the main manifestations are hepatomegaly or compression of adjacent organs such as stomach and intestine, causing upper abdominal discomfort, abdominal distension, abdominal pain, loss of app…
Can hepatic hemangioma be painful	Hepatic cavernous hemangioma is the most common benign tumor of the liver. When the tumor is small, it may be asymptomatic and more often found during physical examination. When the tumor gradually enlarges, the main manifestations are hepatomegaly or compression of adjacent organs such as stomach and intestine, causing upper abdominal discomfort, abdominal distension, abdominal pain, loss of app…
Liver hemangioma, eat much can have distend pain reaction	Hepatic cavernous hemangioma is the most common benign tumor of the liver. When the tumor is small, it may be asymptomatic and more often found during physical examination. When the tumor gradually enlarges, the main manifestations are hepatomegaly or compression of adjacent organs such as stomach and intestine, causing upper abdominal discomfort, abdominal distension, abdominal pain, loss of app…
What are the symptoms of hepatic hemangioma	Hepatic cavernous hemangioma is the most common benign tumor of the liver. When the tumor is small, it may be asymptomatic and more often found during physical examination. When the tumor gradually enlarges, the main manifestations are hepatomegaly or compression of adjacent organs such as stomach and intestine, causing upper abdominal discomfort, abdominal distension, abdominal pain, loss of app…
Does hepatic hemangioma cause pain in the liver region?	Hepatic cavernous hemangioma is the most common benign tumor of the liver. When the tumor is small, it may be asymptomatic and more often found during physical examination. When the tumor gradually enlarges, the main manifestations are hepatomegaly or compression of adjacent organs such as stomach and intestine, causing upper abdominal discomfort, abdominal distension, abdominal pain, loss of app…
Does hepatic hemangioma cause pain in the hepatic region or in the back?	Hepatic cavernous hemangioma is the most common benign tumor of the liver. When the tumor is small, it may be asymptomatic and more often found during physical examination. When the tumor gradually enlarges, the main manifestations are hepatomegaly or compression of adjacent organs such as stomach and intestine, causing upper abdominal discomfort, abdominal distension, abdominal pain, loss of app…
Liver hemangioma can make a person thin	Hepatic cavernous hemangioma is the most common benign tumor of the liver. When the tumor is small, it may be asymptomatic and more often found during physical examination. When the tumor gradually enlarges, the main manifestations are hepatomegaly or compression of adjacent organs such as stomach and intestine, causing upper abdominal discomfort, abdominal distension, abdominal pain, loss of app…
Patients with liver hemangioma may have what symptoms	Hepatic cavernous hemangioma is the most common benign tumor of the liver. When the tumor is small, it may be asymptomatic and more often found during physical examination. When the tumor gradually enlarges, the main manifestations are hepatomegaly or compression of adjacent organs such as stomach and intestine, causing upper abdominal discomfort, abdominal distension, abdominal pain, loss of app…
What are the symptoms of hepatic hemangioma?	Hepatic cavernous hemangioma is the most common benign tumor of the liver. When the tumor is small, it may be asymptomatic and more often found during physical examination. When the tumor gradually enlarges, the main manifestations are hepatomegaly or compression of adjacent organs such as stomach and intestine, causing upper abdominal discomfort, abdominal distension, abdominal pain, loss of app…
What discomfort does hepatic hemangioma cause?	Hepatic cavernous hemangioma is the most common benign tumor of the liver. When the tumor is small, it may be asymptomatic and more often found during physical examination. When the tumor gradually enlarges, the main manifestations are hepatomegaly or compression of adjacent organs such as stomach and intestine, causing upper abdominal discomfort, abdominal distension, abdominal pain, loss of app…
Can hepatic hemangioma cause fatigue?	Hepatic cavernous hemangioma is the most common benign tumor of the liver. When the tumor is small, it may be asymptomatic and more often found during physical examination. When the tumor gradually enlarges, the main manifestations are hepatomegaly or compression of adjacent organs such as stomach and intestine, causing upper abdominal discomfort, abdominal distension, abdominal pain, loss of app…
What are the main symptoms of hepatic hemangioma?	Hepatic cavernous hemangioma is the most common benign tumor of the liver. When the tumor is small, it may be asymptomatic and more often found during physical examination. When the tumor gradually enlarges, the main manifestations are hepatomegaly or compression of adjacent organs such as stomach and intestine, causing upper abdominal discomfort, abdominal distension, abdominal pain, loss of app…
What symptom does hepatic hemangioma have	Hepatic cavernous hemangioma is the most common benign tumor of the liver. When the tumor is small, it may be asymptomatic and more often found during physical examination. When the tumor gradually enlarges, the main manifestations are hepatomegaly or compression of adjacent organs such as stomach and intestine, causing upper abdominal discomfort, abdominal distension, abdominal pain, loss of app…
Liver hemangioma can hurt	Hepatic cavernous hemangioma is the most common benign tumor of the liver. When the tumor is small, it may be asymptomatic and more often found during physical examination. When the tumor gradually enlarges, the main manifestations are hepatomegaly or compression of adjacent organs such as stomach and intestine, causing upper abdominal discomfort, abdominal distension, abdominal pain, loss of app…
What are the main symptoms of hepatic hemangioma?	Hepatic cavernous hemangioma is the most common benign tumor of the liver. When the tumor is small, it may be asymptomatic and more often found during physical examination. When the tumor gradually enlarges, the main manifestations are hepatomegaly or compression of adjacent organs such as stomach and intestine, causing upper abdominal discomfort, abdominal distension, abdominal pain, loss of app…
Have liver hemangioma! I've always had general weakness lately	Hepatic cavernous hemangioma is the most common benign tumor of the liver. When the tumor is small, it may be asymptomatic and more often found during physical examination. When the tumor gradually enlarges, the main manifestations are hepatomegaly or compression of adjacent organs such as stomach and intestine, causing upper abdominal discomfort, abdominal distension, abdominal pain, loss of app…
Does very small liver hemangioma also hurt?	Hepatic cavernous hemangioma is the most common benign tumor of the liver. When the tumor is small, it may be asymptomatic and more often found during physical examination. When the tumor gradually enlarges, the main manifestations are hepatomegaly or compression of adjacent organs such as stomach and intestine, causing upper abdominal discomfort, abdominal distension, abdominal pain, loss of app…
Got liver hemangioma person can emaciate	Hepatic cavernous hemangioma is the most common benign tumor of the liver. When the tumor is small, it may be asymptomatic and more often found during physical examination. When the tumor gradually enlarges, the main manifestations are hepatomegaly or compression of adjacent organs such as stomach and intestine, causing upper abdominal discomfort, abdominal distension, abdominal pain, loss of app…
Can hemangioma in right lobe of liver hurt	Hepatic cavernous hemangioma is the most common benign tumor of the liver. When the tumor is small, it may be asymptomatic and more often found during physical examination. When the tumor gradually enlarges, the main manifestations are hepatomegaly or compression of adjacent organs such as stomach and intestine, causing upper abdominal discomfort, abdominal distension, abdominal pain, loss of app…
Does hepatic hemangioma hurt	Hepatic cavernous hemangioma is the most common benign tumor of the liver. When the tumor is small, it may be asymptomatic and more often found during physical examination. When the tumor gradually enlarges, the main manifestations are hepatomegaly or compression of adjacent organs such as stomach and intestine, causing upper abdominal discomfort, abdominal distension, abdominal pain, loss of app…
Liver hemangioma can chest tightness?	Hepatic cavernous hemangioma is the most common benign tumor of the liver. When the tumor is small, it can be asymptomatic, more than found during physical examination. When the tumor gradually enlarges, the main manifestations are hepatomegaly or compression of stomach, intestine and other adjacent organs, causing upper abdominal discomfort, abdominal distension, abdominal pain, loss of appetite…
Does hepatic hemangioma cause back pain?	Cavernous hemangioma of the liver is the most common benign tumor of the liver. When the tumor is small, it may be asymptomatic and is often found during physical examination. When the tumor gradually enlarges, the main manifestations are hepatomegaly or compression of stomach, intestine and other adjacent organs, causing upper abdominal discomfort, abdominal distension, abdominal pain, loss of a…
Does hepatic hemangioma cause low back pain?	Cavernous hemangioma of the liver is the most common benign tumor of the liver. When the tumor is small, it may be asymptomatic and is often found during physical examination. When the tumor gradually enlarges, the main manifestations are hepatomegaly or compression of stomach, intestine and other adjacent organs, causing upper abdominal discomfort, abdominal distension, abdominal pain, loss of a…
Can liver hemangioma liver area be uncomfortable and painful? Does it hurt in the back, too?	Cavernous hemangioma of the liver is the most common benign tumor of the liver. When the tumor is small, it may be asymptomatic and is often found during physical examination. When the tumor gradually enlarges, the main manifestations are hepatomegaly or compression of stomach, intestine and other adjacent organs, causing upper abdominal discomfort, abdominal distension, abdominal pain, loss of a…
Does hepatic hemangioma cause lumbago	Cavernous hemangioma of the liver is the most common benign tumor of the liver. When the tumor is small, it may be asymptomatic and is often found during physical examination. When the tumor gradually enlarges, the main manifestations are hepatomegaly or compression of stomach, intestine and other adjacent organs, causing upper abdominal discomfort, abdominal distension, abdominal pain, loss of a…
Does hepatic hemangioma cause low back pain	Cavernous hemangioma of the liver is the most common benign tumor of the liver. When the tumor is small, it may be asymptomatic and is often found during physical examination. When the tumor gradually enlarges, the main manifestations are hepatomegaly or compression of stomach, intestine and other adjacent organs, causing upper abdominal discomfort, abdominal distension, abdominal pain, loss of a…
Does liver hemangioma cause pain?	Cavernous hemangioma of the liver is the most common benign tumor of the liver. When the tumor is small, it may be asymptomatic and is often found during physical examination. When the tumor gradually enlarges, the main manifestations are hepatomegaly or compression of stomach, intestine and other adjacent organs, causing upper abdominal discomfort, abdominal distension, abdominal pain, loss of a…
Does liver hemangioma cause low back pain?	Cavernous hemangioma of the liver is the most common benign tumor of the liver. When the tumor is small, it may be asymptomatic and is often found during physical examination. When the tumor gradually enlarges, the main manifestations are hepatomegaly or compression of stomach, intestine and other adjacent organs, causing upper abdominal discomfort, abdominal distension, abdominal pain, loss of a…
Does liver hemangioma cause back pain?	Cavernous hemangioma of the liver is the most common benign tumor of the liver. When the tumor is small, it may be asymptomatic and is often found during physical examination. When the tumor gradually enlarges, the main manifestations are hepatomegaly or compression of stomach, intestine and other adjacent organs, causing upper abdominal discomfort, abdominal distension, abdominal pain, loss of a…
Can liver hemangioma cause dizziness and palpitation?	Hepatic cavernous hemangioma is the most common liver benign tumor, tumor hours can be asymptomatic, more than physical examination found. When the tumor gradually enlarges, the main manifestations are hepatomegaly or compression of stomach, intestine and other adjacent organs, causing upper abdominal discomfort, abdominal distension, abdominal pain, loss of appetite, nausea, belching and other s…
Can hepatic hemangioma cause dizziness?	Hepatic cavernous hemangioma is the most common liver benign tumor, tumor hours can be asymptomatic, more than physical examination found. When the tumor gradually enlarges, the main manifestations are hepatomegaly or compression of stomach, intestine and other adjacent organs, causing upper abdominal discomfort, abdominal distension, abdominal pain, loss of appetite, nausea, belching and other s…
Does hepatic hemangioma cause high blood pressure	Cavernous hemangioma of the liver is the most common benign tumor of the liver. When the tumor is small, it can be asymptomatic and is often found during physical examination. When the tumor gradually enlarges, the main manifestations are hepatomegaly or compression of stomach, intestine and other adjacent organs, causing upper abdominal discomfort, abdominal distension, abdominal pain, loss of a…
Does hepatic hemangioma meet anemia	Hepatic cavernous hemangioma is the most common benign tumor of the liver. When the tumor is small, it can be asymptomatic, more than found during physical examination. When the tumor gradually enlarges, the main manifestations are hepatomegaly or compression of stomach, intestine and other adjacent organs, causing upper abdominal discomfort, abdominal distension, abdominal pain, loss of appetite…
Stomachache, diarrhea and hepatic hemangioma have relationship	Cavernous hemangioma of the liver is the most common benign tumor of the liver. When the tumor is small, it may be asymptomatic and is often found during physical examination. When the tumor gradually enlarges, the main manifestations are hepatomegaly or compression of stomach, intestine and other adjacent organs, causing upper abdominal discomfort, abdominal distension, abdominal pain, loss of a…
Is the pain of hepatic hemangioma normal? How to treat it?	Hepatic cavernous hemangioma is the most common benign tumor of the liver. When the tumor is small, there can be no symptoms, and it is found when doing B-ultrasound examination or other diseases. When the tumor gradually enlarges, the main manifestations are hepatomegaly or compression of stomach, intestine and other adjacent organs, causing upper abdominal discomfort, abdominal distension, abdo…
Will hepatic hemangioma disappear automatically	Hepatic cavernous hemangioma is the most common benign tumor of the liver. Generally, it will not disappear automatically. Small asymptomatic hepatic hemangioma does not need treatment, but B-ultrasound should be performed every 3 to 6 months to dynamically observe the changes of the tumor. Surgical resection should be performed in patients with a diameter greater than 10cm, the possibility of tr…
Is hepatic hemangioma a tumor?	Hepatic cavernous hemangioma is the most common benign tumor of the liver. It is believed that it originates from embryonic vascular hamartoma in the liver. Due to the action of some factors, such as taking steroid hormones, contraceptives and women's pregnancy, it causes tumorlike proliferation and formation. If the diagnosis of this disease is recommended to the regular hospital for diagnosis a…
Is hepatic hemangioma associated with anger	Hepatic cavernous hemangioma is the most common benign tumor of the liver. It is believed that it originates from congenital abnormal development of peripheral blood vessels in the liver. Due to the action of some factors, such as taking steroid hormones, contraceptives and women's pregnancy, it causes tumorlike hyperplasia and formation. At present, there is a lack of evidence to show that facto…
What does hepatic hemangioma look like?	Cavernous hemangioma of the liver is the most common benign tumor of the liver. The tumor is soft in texture, honeycomb-like in cut surface, filled with blood, compressible, and sponge-like, so it is called hepatic cavernous hemangioma. The disease can be single or multiple, and can occur in both left and right liver lobes, but it is more common in the right liver lobe. The size of the tumor is d…
I have a liver hemangioma liver area a little pain how to do	Hepatic cavernous hemangioma is the most common benign tumor of the liver. Small asymptomatic hepatic hemangioma does not need treatment, but B-ultrasound examination should be performed every 3 to 6 months to observe the tumor changes dynamically. Surgical resection should be performed in patients with a diameter greater than 10cm, the possibility of traumatic rupture and massive hemorrhage, or …
I have a liver hemangioma liver area a little pain how to do	Hepatic cavernous hemangioma is the most common benign tumor of the liver. Small asymptomatic hepatic hemangioma does not need treatment, but B-ultrasound examination should be performed every 3 to 6 months to observe the tumor changes dynamically. Surgical resection should be performed in patients with a diameter greater than 10cm, the possibility of traumatic rupture and massive hemorrhage, or …
The hemangioma on the liver is very painful how to do	Hepatic cavernous hemangioma is the most common benign tumor of the liver. Small asymptomatic hepatic hemangioma does not need treatment, but B-ultrasound examination should be performed every 3 to 6 months to observe the tumor changes dynamically. Surgical resection should be performed in patients with a diameter greater than 10cm, the possibility of traumatic rupture and massive hemorrhage, or …
Liver hemangioma causes liver area pain how to do?	Hepatic cavernous hemangioma is the most common benign tumor of the liver. Small asymptomatic hepatic hemangioma does not need treatment, but B-ultrasound examination should be performed every 3 to 6 months to observe the tumor changes dynamically. Surgical resection should be performed in patients with a diameter greater than 10cm, the possibility of traumatic rupture and massive hemorrhage, or …
Is hepatic ascites a symptom of advanced liver cancer?	Ascites is considered to be the advanced stage of liver cirrhosis or liver cancer, and some symptomatic treatment can be given, such as liver protection and diuresis, while paying attention to the treatment of underlying diseases, and albumin support treatment can be given when necessary. At this time, the prognosis of the patient is very poor, and the survival time is relatively short. If you ha…
Why does liver hemangioma become large?	Cavernous hemangioma of the liver is the most common benign tumor of the liver. The disease develops slowly, and the course of the disease can be several years to decades. The cause of tumor enlargement is still unclear, but endocrine factors such as female puberty, pregnancy, and oral contraceptives can promote the rapid enlargement of the tumor. If the disease is diagnosed, it is recommended to…
Liver cyst high fever does not retreat, there is the possibility of liver cancer	Liver abscess will have a fever, liver cyst generally will not have a fever, it is recommended to go to the regular hospital for diagnosis and treatment in time, do enhanced CT or MRI to confirm the diagnosis, and can exclude liver cancer.
The liver hemangioma has been treated with interventional surgery for half a year. Often back ache, how to do	Hepatic cavernous hemangioma is the most common liver benign tumor, tumor hours can be asymptomatic, more than physical examination found. When the tumor gradually enlarges, the main manifestations are hepatomegaly or compression of stomach, intestine and other adjacent organs, causing upper abdominal discomfort, abdominal distension, abdominal pain, loss of appetite, nausea, belching and other s…
Hepatic hemangioma interventional surgery for more than a year why still pain, and grow up	Hepatic cavernous hemangioma is the most common benign liver tumor. When the tumor is small, it can be asymptomatic, more than found during physical examination. When the tumor gradually enlarges, the main manifestations are hepatomegaly or compression of stomach, intestine and other adjacent organs, causing upper abdominal discomfort, abdominal distension, abdominal pain, loss of appetite, nause…
What happens if the hepatic hemangioma ruptures	Cavernous hemangioma of the liver is the most common benign tumor of the liver. If the tumor ruptures, there will be abdominal bleeding, palpitations, sweating, dizziness, hypotension, shock and other symptoms, accompanied by severe abdominal pain, abdominal muscle tension, occasionally tumor pedicled, when torsion can also appear acute abdominal symptoms. If the diagnosis of this disease is reco…
Liver abscess can turn into liver cancer	Liver abscesses are generally caused by bacterial infection, and there is no evidence that liver abscesses can lead to liver cancer. It is recommended to go to a regular hospital for treatment, treat with anti-infective drugs in time, and give puncture and drainage for large liver abscess.
Liver cyst will become liver cancer	Hepatic cyst is a relatively common benign liver disease, mainly parasitic, non-parasitic hepatic cyst, non-parasitic hepatic cyst can be divided into congenital, traumatic, inflammatory and neoplastic cysts. Liver cancer is a primary malignant tumor of the liver originating from epithelial tissues, which may be related to cirrhosis, viral hepatitis, and aflatoxin. There is no evidence that liver…
What symptom does benign liver tumor have?	The most common benign liver tumors are hepatic hemangiomas and hepatic cysts, which generally have no specific symptoms. However, hepatic cysts and hepatic hemangiomas will gradually enlarge, and some patients will have compression symptoms, causing upper abdominal discomfort, abdominal distension, abdominal pain, loss of appetite, nausea, belching and other symptoms. It is recommended to go to …
Symptoms of benign liver tumors?	The most common benign liver tumors are hepatic hemangiomas and hepatic cysts, which generally have no specific symptoms. However, hepatic cysts and hepatic hemangiomas will gradually enlarge, and some patients will have compression symptoms, causing upper abdominal discomfort, abdominal distension, abdominal pain, loss of appetite, nausea, belching and other symptoms. It is recommended to go to …
Is transaminase high and hepatic hemangioma related?	Hepatic cavernous hemangioma is the most common benign liver tumor. Laboratory tests include blood routine, liver function such as transaminase, bilirubin, and tumor markers such as alpha-fetoprotein are normal. Some patients will have a reduction in some coagulation factors, combined with thrombocytopenic purpura, causing bleeding and hemolysis, at this time, there will be abnormal blood routine…
Hello! Can liver hemangioma cause alpha-fetoprotein elevation	Hepatic cavernous hemangioma is the most common benign liver tumor. Laboratory tests include blood routine, liver function such as transaminase, bilirubin, and tumor markers such as alpha-fetoprotein are normal. Some patients will have a reduction in some coagulation factors, combined with thrombocytopenic purpura, causing bleeding and hemolysis, at this time, there will be abnormal blood routine…
Is transaminase high and hepatic hemangioma related?	Hepatic cavernous hemangioma is the most common benign liver tumor. Laboratory tests include blood routine, liver function such as transaminase, bilirubin, and tumor markers such as alpha-fetoprotein are normal. Some patients will have a reduction in some coagulation factors, combined with thrombocytopenic purpura, causing bleeding and hemolysis, at this time, there will be abnormal blood routine…
Can hepatic hemangioma cause high bilirubin?	Hepatic cavernous hemangioma is the most common benign liver tumor. Laboratory tests include blood routine, liver function such as transaminase, bilirubin, and tumor markers such as alpha-fetoprotein are normal. Some patients will have a reduction in some coagulation factors, combined with thrombocytopenic purpura, causing bleeding and hemolysis, at this time, there will be abnormal blood routine…
Does hepatic hemangioma cause elevated alpha-fetoprotein?	Hepatic cavernous hemangioma is the most common benign liver tumor. Laboratory tests include blood routine, liver function such as transaminase, bilirubin, and tumor markers such as alpha-fetoprotein are normal. Some patients will have a reduction in some coagulation factors, combined with thrombocytopenic purpura, causing bleeding and hemolysis, at this time, there will be abnormal blood routine…
Does hepatic hemangioma cause elevated direct bilirubin	Hepatic cavernous hemangioma is the most common benign liver tumor. Laboratory tests include blood routine, liver function such as transaminase, bilirubin, and tumor markers such as alpha-fetoprotein are normal. Some patients will have a reduction in some coagulation factors, combined with thrombocytopenic purpura, causing bleeding and hemolysis, at this time, there will be abnormal blood routine…
Can liver hemangioma cause transaminase high	Hepatic cavernous hemangioma is the most common benign liver tumor. Laboratory tests include blood routine, liver function such as transaminase, bilirubin, and tumor markers such as alpha-fetoprotein are normal. Some patients will have a reduction in some coagulation factors, combined with thrombocytopenic purpura, causing bleeding and hemolysis, at this time, there will be abnormal blood routine…
Can liver hemangioma cause transaminase elevation	Hepatic cavernous hemangioma is the most common benign liver tumor. Laboratory tests include blood routine, liver function such as transaminase, bilirubin, and tumor markers such as alpha-fetoprotein are normal. Some patients will have a reduction in some coagulation factors, combined with thrombocytopenic purpura, causing bleeding and hemolysis, at this time, there will be abnormal blood routine…
Can blood routine measure hepatic hemangioma	Hepatic cavernous hemangioma is the most common benign liver tumor. Laboratory tests include blood routine, liver function such as transaminase, bilirubin, and tumor markers such as alpha-fetoprotein are normal. Some patients will have a reduction in some coagulation factors, combined with thrombocytopenic purpura, causing bleeding and hemolysis, at this time, there will be abnormal blood routine…
Is liver cancer formed after second liver virus deteriorates	Hepatitis B virus carriers, if the liver function is normal, normal abdominal color Doppler ultrasound can be regularly reviewed, do not need treatment, if the liver function is repeatedly abnormal, virus replication is obvious, it is recommended to go to the regular hospital for standardized antiviral treatment, timely intervention, it is not easy to form liver cancer or timely treatment at the …
Contrast-enhanced ct findings of hepatic hemangioma?	Cavernous hemangioma of the liver is the most common benign tumor of the liver. Generally, hepatic hemangioma can be detected by enhanced CT. On CT examination, the edge of the lesion of hepatic hemangioma shows high-density enhancement, and the enhancement area is progressive to the center of the lesion, which expands and lasts for a long time. The lesion was round or ovoid with low density, cle…
Can general cT see is hepatic hemangioma	Cavernous hemangioma of the liver is the most common benign tumor of the liver. Generally, hepatic hemangioma can be detected by enhanced CT. On CT examination, the edge of the lesion of hepatic hemangioma shows high-density enhancement, and the enhancement area is progressive to the center of the lesion, which expands and lasts for a long time. The lesion was round or ovoid with low density, cle…
Can CT detect hepatic hemangioma?	Cavernous hemangioma of the liver is the most common benign tumor of the liver. Generally, hepatic hemangioma can be detected by enhanced CT. On CT examination, the edge of the lesion of hepatic hemangioma shows high-density enhancement, and the enhancement area is progressive to the center of the lesion, which expands and lasts for a long time. The lesion was round or ovoid with low density, cle…
Can contrast-enhanced CT of the liver detect hemangioma in the liver	Cavernous hemangioma of the liver is the most common benign tumor of the liver. Generally, hepatic hemangioma can be detected by enhanced CT. On CT examination, the edge of the lesion of hepatic hemangioma shows high-density enhancement, and the enhancement area is progressive to the center of the lesion, which expands and lasts for a long time. The lesion was round or ovoid with low density, cle…
Should enhanced ct be performed for hepatic hemangioma?	Cavernous hemangioma of the liver is the most common benign tumor of the liver. Generally, hepatic hemangioma can be detected by enhanced CT. On CT examination, the edge of the lesion of hepatic hemangioma shows high-density enhancement, and the enhancement area is progressive to the center of the lesion, which expands and lasts for a long time. The lesion was round or ovoid with low density, cle…
CT findings of hepatic cavernous hemangioma	Cavernous hemangioma of the liver is the most common benign tumor of the liver. Generally, hepatic hemangioma can be detected by enhanced CT. On CT examination, the edge of the lesion of hepatic hemangioma shows high-density enhancement, and the enhancement area is progressive to the center of the lesion, which expands and lasts for a long time. The lesion was round or ovoid with low density, cle…
Is enhanced CT necessary for the diagnosis of hepatic hemangioma	Cavernous hemangioma of the liver is the most common benign tumor of the liver. Generally, hepatic hemangioma can be detected by enhanced CT. On CT examination, the edge of the lesion of hepatic hemangioma shows high-density enhancement, and the enhancement area is progressive to the center of the lesion, which expands and lasts for a long time. The lesion was round or ovoid with low density, cle…
Can contrast-enhanced ct diagnose hepatic hemangioma	Cavernous hemangioma of the liver is the most common benign tumor of the liver. Generally, hepatic hemangioma can be detected by enhanced CT. On CT examination, the edge of the lesion of hepatic hemangioma shows high-density enhancement, and the enhancement area is progressive to the center of the lesion, which expands and lasts for a long time. The lesion was round or ovoid with low density, cle…
Can ct confirm hepatic hemangioma?	Cavernous hemangioma of the liver is the most common benign tumor of the liver. Generally, hepatic hemangioma can be detected by enhanced CT. On CT examination, the edge of the lesion of hepatic hemangioma shows high-density enhancement, and the enhancement area is progressive to the center of the lesion, which expands and lasts for a long time. The lesion was round or ovoid with low density, cle…
Color Doppler ultrasound examination considering liver hemangioma enhanced ct did not detect, I will not be small liver cancer	Hepatic cavernous hemangioma is the most common benign liver tumor. The hemangioma seen by ultrasound is relatively small. Because the color Doppler ultrasound examination is a real-time examination, the resolution gap is very small, so the very small abnormal echo ultrasound can be seen, but the qualitative is not as good as CT, and CT scanning gap is large, and the small hemangioma may not be s…
Liver hemangioma was detected by physical examination B-ultrasound, and enhanced CT examination was performed to detect hemangioma	Hepatic cavernous hemangioma is the most common benign liver tumor. The hemangioma seen by ultrasound is relatively small. Because the color Doppler ultrasound examination is a real-time examination, the resolution gap is very small, so the very small abnormal echo ultrasound can be seen, but the qualitative is not as good as CT, and CT scanning gap is large, and the small hemangioma may not be s…
B ultrasound and CT examination results of hepatic hemangioma is inconsistent how to return a responsibility	Hepatic cavernous hemangioma is the most common benign liver tumor. The hemangioma seen by ultrasound is relatively small. Because the color Doppler ultrasound examination is a real-time examination, the resolution gap is very small, so the very small abnormal echo ultrasound can be seen, but the qualitative is not as good as CT, and CT scanning gap is large, and the small hemangioma may not be s…
Hyperechoic hemangioma in the liver?	Hepatic cavernous hemangioma is the most common benign liver tumor, and B-ultrasound is the most commonly used examination method. The typical small hemangioma is a medium echogenic light cluster with uniform density, clear boundary and regular shape. The internal echo of cavernous hemangioma was different in intensity, and there were anechoic areas with irregular shape and different sizes. If th…
b ultrasound liver hemangioma can be detected	Hepatic cavernous hemangioma is the most common benign liver tumor, and B-ultrasound is the most commonly used examination method. The typical small hemangioma is a medium echogenic light cluster with uniform density, clear boundary and regular shape. The internal echo of cavernous hemangioma was different in intensity, and there were anechoic areas with irregular shape and different sizes. If th…
Is it normal for intrahepatic hemangioma to have high echo and abundant blood flow signals	Hepatic cavernous hemangioma is the most common benign liver tumor, and B-ultrasound is the most commonly used examination method. The typical small hemangioma is a medium echogenic light cluster with uniform density, clear boundary and regular shape. The internal echo of cavernous hemangioma was different in intensity, and there were anechoic areas with irregular shape and different sizes. If th…
What is the possibility of a slightly hyperechoic hemangioma in the liver?	Hepatic cavernous hemangioma is the most common benign liver tumor, and B-ultrasound is the most commonly used examination method. The typical small hemangioma is a medium echogenic light cluster with uniform density, clear boundary and regular shape. The internal echo of cavernous hemangioma was different in intensity, and there were anechoic areas with irregular shape and different sizes. If th…
Is color Doppler ultrasound accurate in detecting hepatic hemangioma?	Hepatic cavernous hemangioma is the most common benign liver tumor, and B-ultrasound is the most commonly used examination method. The typical small hemangioma is a medium echogenic light cluster with uniform density, clear boundary and regular shape. The internal echo of cavernous hemangioma was different in intensity, and there were anechoic areas with irregular shape and different sizes. If th…
Is hypoechoic liver hemangioma?	Hepatic cavernous hemangioma is the most common benign liver tumor, and B-ultrasound is the most commonly used examination method. The typical small hemangioma is a medium echogenic light cluster with uniform density, clear boundary and regular shape. The internal echo of cavernous hemangioma was different in intensity, and there were anechoic areas with irregular shape and different sizes. If th…
Do b ultrasound can detect hepatic hemangioma?	Hepatic cavernous hemangioma is the most common benign liver tumor, and B-ultrasound is the most commonly used examination method. The typical small hemangioma is a medium echogenic light cluster with uniform density, clear boundary and regular shape. The internal echo of cavernous hemangioma was different in intensity, and there were anechoic areas with irregular shape and different sizes. If th…
Will color ultrasound misdiagnose hepatic hemangioma?	Hepatic cavernous hemangioma is the most common benign liver tumor, and B-ultrasound is the most commonly used examination method. The typical small hemangioma is a medium echogenic light cluster with uniform density, clear boundary and regular shape. The internal echo of cavernous hemangioma was different in intensity, and there were anechoic areas with irregular shape and different sizes. If th…
Liver B ultrasound, the doctor suspected hemangioma, blood routine was normal	Hepatic cavernous hemangioma is the most common benign liver tumor, and B-ultrasound is the most commonly used examination method. The typical small hemangioma is a medium echogenic light cluster with uniform density, clear boundary and regular shape. The internal echo of cavernous hemangioma was different in intensity, and there were anechoic areas with irregular shape and different sizes. If th…
Can liver hemangioma be examined with B ultrasound?	Hepatic cavernous hemangioma is the most common benign liver tumor, and B-ultrasound is the most commonly used examination method. The typical small hemangioma is a medium echogenic light cluster with uniform density, clear boundary and regular shape. The internal echo of cavernous hemangioma was different in intensity, and there were anechoic areas with irregular shape and different sizes. If th…
B ultrasound can detect hepatic hemangioma	Hepatic cavernous hemangioma is the most common benign liver tumor, and B-ultrasound is the most commonly used examination method. The typical small hemangioma is a medium echogenic light cluster with uniform density, clear boundary and regular shape. The internal echo of cavernous hemangioma was different in intensity, and there were anechoic areas with irregular shape and different sizes. If th…
Is there a blood flow signal in hepatic hemangioma?	Hepatic cavernous hemangioma is the most common benign liver tumor, and B-ultrasound is the most commonly used examination method. The typical small hemangioma is a medium echogenic light cluster with uniform density, clear boundary and regular shape. The internal echo of cavernous hemangioma was different in intensity, and there were anechoic areas with irregular shape and different sizes. If th…
Is the blood flow signal normal in the hepatic hemangioma	Hepatic cavernous hemangioma is the most common benign liver tumor, and B-ultrasound is the most commonly used examination method. The typical small hemangioma is a medium echogenic light cluster with uniform density, clear boundary and regular shape. The internal echo of cavernous hemangioma was different in intensity, and there were anechoic areas with irregular shape and different sizes. If th…
What examination does hepatic hemangioma do to be able to diagnose?	Hepatic cavernous hemangioma is the most common benign liver tumor, and B-ultrasound is the most commonly used examination method. The typical small hemangioma is a medium echogenic light cluster with uniform density, clear boundary and regular shape. The internal echo of cavernous hemangioma was different in intensity, and there were anechoic areas with irregular shape and different sizes. If th…
What instrument does the doctor use to check hepatic hemangioma is good	Hepatic cavernous hemangioma is the most common benign liver tumor, and B-ultrasound is the most commonly used examination method. The typical small hemangioma is a medium echogenic light cluster with uniform density, clear boundary and regular shape. The internal echo of cavernous hemangioma was different in intensity, and there were anechoic areas with irregular shape and different sizes. If th…
B ultrasound shows hepatic hemangioma can be diagnosed	Hepatic cavernous hemangioma is the most common benign liver tumor, and B-ultrasound is the most commonly used examination method. The typical small hemangioma is a medium echogenic light cluster with uniform density, clear boundary and regular shape. The internal echo of cavernous hemangioma was different in intensity, and there were anechoic areas with irregular shape and different sizes. If th…
Can be diagnosed as hepatic hemangioma, what examination should also be done?	Hepatic cavernous hemangioma is the most common benign liver tumor, and B-ultrasound is the most commonly used examination method. The typical small hemangioma is a medium echogenic light cluster with uniform density, clear boundary and regular shape. The internal echo of cavernous hemangioma was different in intensity, and there were anechoic areas with irregular shape and different sizes. If th…
What method can check out is hepatic hemangioma?	Hepatic cavernous hemangioma is the most common benign liver tumor, and B-ultrasound is the most commonly used examination method. The typical small hemangioma is a medium echogenic light cluster with uniform density, clear boundary and regular shape. The internal echo of cavernous hemangioma was different in intensity, and there were anechoic areas with irregular shape and different sizes. If th…
Need to diagnose liver hemangioma is to do enhanced ct good or enhanced magnetic resonance imaging good?	Hepatic cavernous hemangioma is the most common benign liver tumor, and B-ultrasound is the most commonly used examination method. The typical small hemangioma is a medium echogenic light cluster with uniform density, clear boundary and regular shape. The internal echo of cavernous hemangioma was different in intensity, and there were anechoic areas with irregular shape and different sizes. If th…
What examination does hepatic hemangioma need to do	Hepatic cavernous hemangioma is the most common benign liver tumor, and B-ultrasound is the most commonly used examination method. The typical small hemangioma is a medium echogenic light cluster with uniform density, clear boundary and regular shape. The internal echo of cavernous hemangioma was different in intensity, and there were anechoic areas with irregular shape and different sizes. If th…
What tests can be done to confirm the diagnosis of hepatic hemangioma?	Hepatic cavernous hemangioma is the most common benign liver tumor, and B-ultrasound is the most commonly used examination method. The typical small hemangioma is a medium echogenic light cluster with uniform density, clear boundary and regular shape. The internal echo of cavernous hemangioma was different in intensity, and there were anechoic areas with irregular shape and different sizes. If th…
Can b ultrasound diagnose hepatic hemangioma?	Hepatic cavernous hemangioma is the most common benign liver tumor, and B-ultrasound is the most commonly used examination method. The typical small hemangioma is a medium echogenic light cluster with uniform density, clear boundary and regular shape. The internal echo of cavernous hemangioma was different in intensity, and there were anechoic areas with irregular shape and different sizes. If th…
Can B-ultrasound diagnose hepatic hemangioma?	Hepatic cavernous hemangioma is the most common benign liver tumor, and B-ultrasound is the most commonly used examination method. The typical small hemangioma is a medium echogenic light cluster with uniform density, clear boundary and regular shape. The internal echo of cavernous hemangioma was different in intensity, and there were anechoic areas with irregular shape and different sizes. If th…
What does it mean that the boundary of hepatic hemangioma is not clear	Hepatic cavernous hemangioma is the most common benign liver tumor, and B-ultrasound is the most commonly used examination method. The typical small hemangioma is a medium echogenic light cluster with uniform density, clear boundary and regular shape. The internal echo of cavernous hemangioma was different in intensity, and there were anechoic areas with irregular shape and different sizes. If th…
Can hepatic hemangioma be poorly circumscribed?	Hepatic cavernous hemangioma is the most common benign liver tumor, and B-ultrasound is the most commonly used examination method. The typical small hemangioma is a medium echogenic light cluster with uniform density, clear boundary and regular shape. The internal echo of cavernous hemangioma was different in intensity, and there were anechoic areas with irregular shape and different sizes. If th…
What does hepatic hemangioma boundary not clear mean?	Hepatic cavernous hemangioma is the most common benign liver tumor, and B-ultrasound is the most commonly used examination method. The typical small hemangioma is a medium echogenic light cluster with uniform density, clear boundary and regular shape. The internal echo of cavernous hemangioma was different in intensity, and there were anechoic areas with irregular shape and different sizes. If th…
What examination should be done before operation of hepatic hemangioma?	Hepatic cavernous hemangioma is the most common benign liver tumor, and B-ultrasound is the most commonly used examination method. If the diagnosis cannot be confirmed by B-ultrasound, further liver CT or magnetic resonance imaging can be performed to determine whether it is hepatic hemangioma. The final diagnosis depends on postoperative pathology. Electrocardiogram, chest X-ray and echocardiogr…
How to reexamine suspected hepatic hemangioma found by physical examination B ultrasound?	Hepatic cavernous hemangioma is the most common benign tumor of the liver. Small asymptomatic hepatic hemangioma does not need treatment, but should be reexamined every 3 to 6 months to observe the dynamic changes of the tumor. If the disease is diagnosed, it is recommended to go to a regular hospital for diagnosis and treatment. Blood routine, liver function, liver B ultrasound, and liver enhanc…
Should the reexamination of hepatic hemangioma be performed on an empty stomach?	The examination or reexamination of hepatic hemangioma generally requires blood routine examination, liver function, liver B ultrasound, enhanced CT or MRI, and should be fasting. It is recommended to go to a regular hospital for diagnosis and treatment after liver hemangioma is found.
Should hepatic hemangioma be empty when making B ultrasound examination	The examination or reexamination of hepatic hemangioma generally requires blood routine examination, liver function, liver B ultrasound, enhanced CT or MRI, and should be fasting. It is recommended to go to a regular hospital for diagnosis and treatment after liver hemangioma is found.
Is fasting required before the examination of hepatic hemangioma	The examination or reexamination of hepatic hemangioma generally requires blood routine examination, liver function, liver B ultrasound, enhanced CT or MRI, and should be fasting. It is recommended to go to a regular hospital for diagnosis and treatment after liver hemangioma is found.
Is hepatic hemangioma reexamination only b ultrasound ok?	The examination or reexamination of hepatic hemangioma generally requires blood routine examination, liver function, liver B ultrasound, enhanced CT or MRI, and should be fasting. It is recommended to go to a regular hospital for diagnosis and treatment after liver hemangioma is found.
How big is hepatic hemangioma generally?	Cavernous hemangioma of the liver is the most common benign tumor of the liver. The disease can be single or multiple, both left and right liver lobes can occur, but the right lobe of the liver is more common. The size of the tumor is different. The small can only be diagnosed under a microscope, and the large can weigh more than 10 kilograms. If the diagnosis of this disease is recommended to th…
Is hepatic hemangioma 62*50mm serious?	Hepatic cavernous hemangioma is the most common benign tumor of the liver. Small asymptomatic hepatic hemangioma does not need treatment, but B-ultrasound examination should be performed every 3 to 6 months to observe the tumor changes dynamically. Surgical resection should be performed in patients with a diameter greater than 10cm, the possibility of traumatic rupture and massive hemorrhage, or …
Is hepatic hemangioma 2cm serious?	Hepatic cavernous hemangioma is the most common benign tumor of the liver. Small asymptomatic hepatic hemangioma does not need treatment, but B-ultrasound examination should be performed every 3 to 6 months to observe the tumor changes dynamically. Surgical resection should be performed in patients with a diameter greater than 10cm, the possibility of traumatic rupture and massive hemorrhage, or …
Does 1cm hepatic hemangioma matter?	Hepatic cavernous hemangioma is the most common benign tumor of the liver. Small asymptomatic hepatic hemangioma does not need treatment, but B-ultrasound examination should be performed every 3 to 6 months to observe the tumor changes dynamically. Surgical resection should be performed in patients with a diameter greater than 10cm, the possibility of traumatic rupture and massive hemorrhage, or …
Is 1cm hepatic hemangioma serious	Hepatic cavernous hemangioma is the most common benign tumor of the liver. Small asymptomatic hepatic hemangioma does not need treatment, but B-ultrasound examination should be performed every 3 to 6 months to observe the tumor changes dynamically. Surgical resection should be performed in patients with a diameter greater than 10cm, the possibility of traumatic rupture and massive hemorrhage, or …
9 cm liver hemangioma how to do?	Hepatic cavernous hemangioma is the most common benign tumor of the liver. Small asymptomatic hepatic hemangioma does not need treatment, but B-ultrasound examination should be performed every 3 to 6 months to observe the tumor changes dynamically. Surgical resection should be performed in patients with a diameter greater than 10cm, the possibility of traumatic rupture and massive hemorrhage, or …
Is the liver hemangioma 6.5 big?	Hepatic cavernous hemangioma is the most common benign tumor of the liver. Small asymptomatic hepatic hemangioma does not need treatment, but B-ultrasound examination should be performed every 3 to 6 months to observe the tumor changes dynamically. Surgical resection should be performed in patients with a diameter greater than 10cm, the possibility of traumatic rupture and massive hemorrhage, or …
How to do liver hemangioma 7 centimeters?	Hepatic cavernous hemangioma is the most common benign tumor of the liver. Small asymptomatic hepatic hemangioma does not need treatment, but B-ultrasound examination should be performed every 3 to 6 months to observe the tumor changes dynamically. Surgical resection should be performed in patients with a diameter greater than 10cm, the possibility of traumatic rupture and massive hemorrhage, or …
12*9mm liver hemangioma how to deal with?	Hepatic cavernous hemangioma is the most common benign tumor of the liver. Small asymptomatic hepatic hemangioma does not need treatment, but B-ultrasound examination should be performed every 3 to 6 months to observe the tumor changes dynamically. Surgical resection should be performed in patients with a diameter greater than 10cm, the possibility of traumatic rupture and massive hemorrhage, or …
What is the best treatment method of liver hemangioma that is greater than 10 centimeters	Hepatic cavernous hemangioma is the most common benign tumor of the liver. Small asymptomatic hepatic hemangioma does not need treatment, but B-ultrasound examination should be performed every 3 to 6 months to observe the tumor changes dynamically. Surgical resection should be performed in patients with a diameter greater than 10cm, the possibility of traumatic rupture and massive hemorrhage, or …
Does my liver right posterior lobe check have a 8mm small hemangioma to matter	Hepatic cavernous hemangioma is the most common benign tumor of the liver. Small asymptomatic hepatic hemangioma does not need treatment, but B-ultrasound examination should be performed every 3 to 6 months to observe the tumor changes dynamically. Surgical resection should be performed in patients with a diameter greater than 10cm, the possibility of traumatic rupture and massive hemorrhage, or …
Does my liver right posterior lobe check have a 8mm small hemangioma to matter	Hepatic cavernous hemangioma is the most common benign tumor of the liver. Small asymptomatic hepatic hemangioma does not need treatment, but B-ultrasound examination should be performed every 3 to 6 months to observe the tumor changes dynamically. Surgical resection should be performed in patients with a diameter greater than 10cm, the possibility of traumatic rupture and massive hemorrhage, or …
I did a color Doppler ultrasound and found a 1 centimeter hemangioma on the liver. What should I do?	Hepatic cavernous hemangioma is the most common benign tumor of the liver. Small asymptomatic hepatic hemangioma does not need treatment, but B-ultrasound examination should be performed every 3 to 6 months to observe the tumor changes dynamically. Surgical resection should be performed in patients with a diameter greater than 10cm, the possibility of traumatic rupture and massive hemorrhage, or …
I do B ultrasound examination today is liver hemangioma largest 2 cm, need not need surgery?	Hepatic cavernous hemangioma is the most common benign tumor of the liver. Small asymptomatic hepatic hemangioma does not need treatment, but B-ultrasound examination should be performed every 3 to 6 months to observe the tumor changes dynamically. Surgical resection should be performed in patients with a diameter greater than 10cm, the possibility of traumatic rupture and massive hemorrhage, or …
1 cm hemangioma in the liver?	Hepatic cavernous hemangioma is the most common benign tumor of the liver. Small asymptomatic hepatic hemangioma does not need treatment, but B-ultrasound examination should be performed every 3 to 6 months to observe the tumor changes dynamically. Surgical resection should be performed in patients with a diameter greater than 10cm, the possibility of traumatic rupture and massive hemorrhage, or …
Multiple hemangiomas of the liver are about 10 cm in size	Hepatic cavernous hemangioma is the most common benign tumor of the liver. Small asymptomatic hepatic hemangioma does not need treatment, but B-ultrasound examination should be performed every 3 to 6 months to observe the tumor changes dynamically. Surgical resection should be performed in patients with a diameter greater than 10cm, the possibility of traumatic rupture and massive hemorrhage, or …
Liver has hemangioma does not matter to have 2 cm so big	Hepatic cavernous hemangioma is the most common benign tumor of the liver. Small asymptomatic hepatic hemangioma does not need treatment, but B-ultrasound examination should be performed every 3 to 6 months to observe the tumor changes dynamically. Surgical resection should be performed in patients with a diameter greater than 10cm, the possibility of traumatic rupture and massive hemorrhage, or …
Is hepatic hemangioma 3*4 cm dangerous	Hepatic cavernous hemangioma is the most common benign tumor of the liver. Small asymptomatic hepatic hemangioma does not need treatment, but B-ultrasound examination should be performed every 3 to 6 months to observe the tumor changes dynamically. Surgical resection should be performed in patients with a diameter greater than 10cm, the possibility of traumatic rupture and massive hemorrhage, or …
How to treat liver hemangioma 7.4 cm	Hepatic cavernous hemangioma is the most common benign tumor of the liver. Small asymptomatic hepatic hemangioma does not need treatment, but B-ultrasound examination should be performed every 3 to 6 months to observe the tumor changes dynamically. Surgical resection should be performed in patients with a diameter greater than 10cm, the possibility of traumatic rupture and massive hemorrhage, or …
Liver hemangioma 5 cm or so, how to do	Hepatic cavernous hemangioma is the most common benign tumor of the liver. Small asymptomatic hepatic hemangioma does not need treatment, but B-ultrasound examination should be performed every 3 to 6 months to observe the tumor changes dynamically. Surgical resection should be performed in patients with a diameter greater than 10cm, the possibility of traumatic rupture and massive hemorrhage, or …
Is hepatic hemangioma 3 cm serious?	Hepatic cavernous hemangioma is the most common benign tumor of the liver. Small asymptomatic hepatic hemangioma does not need treatment, but B-ultrasound examination should be performed every 3 to 6 months to observe the tumor changes dynamically. Surgical resection should be performed in patients with a diameter greater than 10cm, the possibility of traumatic rupture and massive hemorrhage, or …
Is hepatic hemangioma 1cm serious?	Hepatic cavernous hemangioma is the most common benign tumor of the liver. Small asymptomatic hepatic hemangioma does not need treatment, but B-ultrasound examination should be performed every 3 to 6 months to observe the tumor changes dynamically. Surgical resection should be performed in patients with a diameter greater than 10cm, the possibility of traumatic rupture and massive hemorrhage, or …
Is hepatic hemangioma 6 cm serious?	Hepatic cavernous hemangioma is the most common benign tumor of the liver. Small asymptomatic hepatic hemangioma does not need treatment, but B-ultrasound examination should be performed every 3 to 6 months to observe the tumor changes dynamically. Surgical resection should be performed in patients with a diameter greater than 10cm, the possibility of traumatic rupture and massive hemorrhage, or …
Is hepatic hemangioma 3 cm serious?	Hepatic cavernous hemangioma is the most common benign tumor of the liver. Small asymptomatic hepatic hemangioma does not need treatment, but B-ultrasound examination should be performed every 3 to 6 months to observe the tumor changes dynamically. Surgical resection should be performed in patients with a diameter greater than 10cm, the possibility of traumatic rupture and massive hemorrhage, or …
Is hepatic hemangioma 3 cm serious?	Hepatic cavernous hemangioma is the most common benign tumor of the liver. Small asymptomatic hepatic hemangioma does not need treatment, but B-ultrasound examination should be performed every 3 to 6 months to observe the tumor changes dynamically. Surgical resection should be performed in patients with a diameter greater than 10cm, the possibility of traumatic rupture and massive hemorrhage, or …
Is hepatic hemangioma 7 cm serious?	Hepatic cavernous hemangioma is the most common benign tumor of the liver. Small asymptomatic hepatic hemangioma does not need treatment, but B-ultrasound examination should be performed every 3 to 6 months to observe the tumor changes dynamically. Surgical resection should be performed in patients with a diameter greater than 10cm, the possibility of traumatic rupture and massive hemorrhage, or …
Is hepatic hemangioma 5 cm serious?	Hepatic cavernous hemangioma is the most common benign tumor of the liver. Small asymptomatic hepatic hemangioma does not need treatment, but B-ultrasound examination should be performed every 3 to 6 months to observe the tumor changes dynamically. Surgical resection should be performed in patients with a diameter greater than 10cm, the possibility of traumatic rupture and massive hemorrhage, or …
Is liver hemangioma 2 cm serious?	Hepatic cavernous hemangioma is the most common benign tumor of the liver. Small asymptomatic hepatic hemangioma does not need treatment, but B-ultrasound examination should be performed every 3 to 6 months to observe the tumor changes dynamically. Surgical resection should be performed in patients with a diameter greater than 10cm, the possibility of traumatic rupture and massive hemorrhage, or …
Liver right lobe hemangioma size about 10X10mm need how to treat seriously not	Hepatic cavernous hemangioma is the most common benign tumor of the liver. Small asymptomatic hepatic hemangioma does not need treatment, but B-ultrasound examination should be performed every 3 to 6 months to observe the tumor changes dynamically. Surgical resection should be performed in patients with a diameter greater than 10cm, the possibility of traumatic rupture and massive hemorrhage, or …
What does 12×8 mm mean for intrahepatic hemangioma	Hepatic cavernous hemangioma is the most common benign tumor of the liver. Small asymptomatic hepatic hemangioma does not need treatment, but B-ultrasound examination should be performed every 3 to 6 months to observe the tumor changes dynamically. Surgical resection should be performed in patients with a diameter greater than 10cm, the possibility of traumatic rupture and massive hemorrhage, or …
The hepatic hemangioma is 4 cm in size, whether it is large or small in this case history	Hepatic cavernous hemangioma is the most common benign tumor of the liver. Small asymptomatic hepatic hemangioma does not need treatment, but B-ultrasound examination should be performed every 3 to 6 months to observe the tumor changes dynamically. Surgical resection should be performed in patients with a diameter greater than 10cm, the possibility of traumatic rupture and massive hemorrhage, or …
Is hepatic hemangioma 1 cm serious in the end	Hepatic cavernous hemangioma is the most common benign tumor of the liver. Small asymptomatic hepatic hemangioma does not need treatment, but B-ultrasound examination should be performed every 3 to 6 months to observe the tumor changes dynamically. Surgical resection should be performed in patients with a diameter greater than 10cm, the possibility of traumatic rupture and massive hemorrhage, or …
Liver hemangioma physical examination has more than 8 cm	Hepatic cavernous hemangioma is the most common benign tumor of the liver. Small asymptomatic hepatic hemangioma does not need treatment, but B-ultrasound examination should be performed every 3 to 6 months to observe the tumor changes dynamically. Surgical resection should be performed in patients with a diameter greater than 10cm, the possibility of traumatic rupture and massive hemorrhage, or …
The physical examination shows that the liver hemangioma is about 18*16mm, does it need surgery	Hepatic cavernous hemangioma is the most common benign tumor of the liver. Small asymptomatic hepatic hemangioma does not need treatment, but B-ultrasound examination should be performed every 3 to 6 months to observe the tumor changes dynamically. Surgical resection should be performed in patients with a diameter greater than 10cm, the possibility of traumatic rupture and massive hemorrhage, or …
B ultrasound results showed a nodule in the right lobe of the liver, what is the hemangioma considered?	Hepatic cavernous hemangioma is the most common benign tumor of the liver. It is believed that it originates from embryonic vascular hamartoma in the liver. Due to the action of some factors, such as taking steroid hormones, contraceptives and women's pregnancy, it causes tumorlike proliferation and formation. If the diagnosis of this disease is recommended to the regular hospital for diagnosis a…
A space-occupying lesion in the right lobe of the liver with the possibility of cavernous hemangioma	Hepatic cavernous hemangioma is the most common benign tumor of the liver. It is believed that it originates from embryonic vascular hamartoma in the liver. Due to the action of some factors, such as taking steroid hormones, contraceptives and women's pregnancy, it causes tumorlike proliferation and formation. If the diagnosis of this disease is recommended to the regular hospital for diagnosis a…
Go physical examination today to say my liver right lobe hemangioma May 12×11mm, what disease is it	Hepatic cavernous hemangioma is the most common benign tumor of the liver. It is believed that it originates from embryonic vascular hamartoma in the liver. Due to the action of some factors, such as taking steroid hormones, contraceptives and women's pregnancy, it causes tumorlike proliferation and formation. If the diagnosis of this disease is recommended to the regular hospital for diagnosis a…
What disease is hepatic hemangioma	Hepatic cavernous hemangioma is the most common benign tumor of the liver. It is believed that it originates from embryonic vascular hamartoma in the liver. Due to the action of some factors, such as taking steroid hormones, contraceptives and women's pregnancy, it causes tumorlike proliferation and formation. If the diagnosis of this disease is recommended to the regular hospital for diagnosis a…
What is hepatic hemangioma to return a responsibility	Hepatic cavernous hemangioma is the most common benign tumor of the liver. It is believed that it originates from embryonic vascular hamartoma in the liver. Due to the action of some factors, such as taking steroid hormones, contraceptives and women's pregnancy, it causes tumorlike proliferation and formation. If the diagnosis of this disease is recommended to the regular hospital for diagnosis a…
The child's physical examination last year found that there was a hemangioma 6mm×7mm on the liver	Hepatic cavernous hemangioma is the most common benign tumor of the liver. Small asymptomatic hepatic hemangioma does not require treatment, but B-ultrasound examination should be performed every 3 to 6 months to observe the tumor changes dynamically. Surgical resection should be performed in patients with a diameter greater than 10cm, the possibility of traumatic rupture and massive hemorrhage, …
B ultrasound examination of hepatic hemangioma does not matter	Hepatic cavernous hemangioma is the most common benign tumor of the liver. Small asymptomatic hepatic hemangioma does not need treatment, but B-ultrasound examination should be performed every 3 to 6 months to observe the tumor changes dynamically. Surgical resection should be performed in patients with a diameter greater than 10cm, the possibility of traumatic rupture and massive hemorrhage, or …
How does my physical examination find hepatic right lobe hemangioma to treat	Hepatic cavernous hemangioma is the most common benign tumor of the liver. Small asymptomatic hepatic hemangioma does not need treatment, but B-ultrasound examination should be performed every 3 to 6 months to observe the tumor changes dynamically. Surgical resection should be performed in patients with a diameter greater than 10cm, the possibility of traumatic rupture and massive hemorrhage, or …
Why did hemangioma grow on the liver not need to be treated?	Hepatic cavernous hemangioma is the most common benign tumor of the liver. Small asymptomatic hepatic hemangioma does not need treatment, but B-ultrasound examination should be performed every 3 to 6 months to observe the tumor changes dynamically. Surgical resection should be performed in patients with a diameter greater than 10cm, the possibility of traumatic rupture and massive hemorrhage, or …
How to do to have hemangioma on liver	Hepatic cavernous hemangioma is the most common benign tumor of the liver. Small asymptomatic hepatic hemangioma does not need treatment, but B-ultrasound examination should be performed every 3 to 6 months to observe the tumor changes dynamically. Surgical resection should be performed in patients with a diameter greater than 10cm, the possibility of traumatic rupture and massive hemorrhage, or …
Physical examination is to suspect is hepatic hemangioma, serious?	Hepatic cavernous hemangioma is the most common benign tumor of the liver. Small asymptomatic hepatic hemangioma does not need treatment, but B-ultrasound examination should be performed every 3 to 6 months to observe the tumor changes dynamically. Surgical resection should be performed in patients with a diameter greater than 10cm, the possibility of traumatic rupture and massive hemorrhage, or …
A hyperechoic nodule in the right lobe of the liver is suspected to be a hemangioma. How should excuse me treat	Hepatic cavernous hemangioma is the most common benign tumor of the liver. Small asymptomatic hepatic hemangioma does not need treatment, but B-ultrasound examination should be performed every 3 to 6 months to observe the tumor changes dynamically. Surgical resection should be performed in patients with a diameter greater than 10cm, the possibility of traumatic rupture and massive hemorrhage, or …
There is hemangioma on the liver checked by color ultrasound, does this need immediate operation	Hepatic cavernous hemangioma is the most common benign tumor of the liver. Small asymptomatic hepatic hemangioma does not need treatment, but B-ultrasound examination should be performed every 3 to 6 months to observe the tumor changes dynamically. Surgical resection should be performed in patients with a diameter greater than 10cm, the possibility of traumatic rupture and massive hemorrhage, or …
Check on liver, have a very small hemangioma, how should do	Hepatic cavernous hemangioma is the most common benign tumor of the liver. Small asymptomatic hepatic hemangioma does not need treatment, but B-ultrasound examination should be performed every 3 to 6 months to observe the tumor changes dynamically. Surgical resection should be performed in patients with a diameter greater than 10cm, the possibility of traumatic rupture and massive hemorrhage, or …
Liver hemangioma is bigger and bigger, how should do?	Hepatic cavernous hemangioma is the most common benign tumor of the liver. Small asymptomatic hepatic hemangioma does not need treatment, but B-ultrasound examination should be performed every 3 to 6 months to observe the tumor changes dynamically. Surgical resection should be performed in patients with a diameter greater than 10cm, the possibility of traumatic rupture and massive hemorrhage, or …
Do color ultrasound check out liver hemangioma serious	Hepatic cavernous hemangioma is the most common benign tumor of the liver. Small asymptomatic hepatic hemangioma does not need treatment, but B-ultrasound examination should be performed every 3 to 6 months to observe the tumor changes dynamically. Surgical resection should be performed in patients with a diameter greater than 10cm, the possibility of traumatic rupture and massive hemorrhage, or …
Can I get liver hemangioma to cure?	Hepatic cavernous hemangioma is the most common benign tumor of the liver. Generally, it does not disappear automatically. Small asymptomatic hepatic hemangioma does not need treatment, but B-ultrasound examination should be performed every 3 to 6 months to dynamically observe the changes of the tumor. Surgical resection should be performed in patients with a diameter greater than 10cm, the possi…
How to return a responsibility on liver long tumor	Suggest go to regular hospital to see a doctor, clear tumor is benign or malignant above all. Hemangioma is the most common benign liver tumor. Liver cancer was the most common malignant tumor. Complete blood routine, AFP, liver function, B-ultrasound, CT or MRI examination, determine the treatment plan, surgery is one of the commonly used methods for the treatment of tumors.
CT enhanced report and symptoms of liver cancer Is liver cancer?	Hepatocellular carcinoma (HCC) is a primary malignant tumor of the liver arising from epithelial tissues. It is generally diagnosed by medical history, symptoms and signs, AFP, and enhanced CT. CT can reflect the pathological manifestations of the liver, such as the size, shape, location, number, hemorrhage, necrosis and calcification in the lesions. The invasion of the lesion can be known from t…
Isn't contrast-enhanced ct of the liver very clear for the diagnosis of liver cancer	The coincidence rate of CT in the diagnosis of liver cancer is more than 90%, and it can detect small liver cancer about 1.0cm. When the diameter of liver cancer is too small, the plane may not be scanned. If the diagnosis is suspected, it is recommended to go to a regular hospital for further MRI examination to confirm the diagnosis, and the final diagnosis depends on pathology.
The final diagnosis depends on pathology. What is the difference between small hepatocellular carcinoma and hepatic cyst by B-ultrasound?	Small liver cancer is generally suggested as hypoechoic nodules on B ultrasound, and a small amount of blood flow signal can be seen in the nodules, while hepatic cysts generally contain cystic fluid, hypoechoic or anechoic nodules under B ultrasound, and there is no obvious blood flow signal. Abdominal CT or magnetic resonance imaging can also be considered for further confirmation, and the fina…
The final diagnosis depends on pathology. What is the difference between small hepatocellular carcinoma and hepatic cyst by B-ultrasound?	Small liver cancer is generally suggested as hypoechoic nodules on B ultrasound, and a small amount of blood flow signal can be seen in the nodules, while hepatic cysts generally contain cystic fluid, hypoechoic or anechoic nodules under B ultrasound, and there is no obvious blood flow signal. Abdominal CT or magnetic resonance imaging can also be considered for further confirmation, and the fina…
hello. Is multiple space-occupying lesions in the liver liver cancer?	Liver space-occupying lesions can be divided into malignant and benign space-occupying lesions according to their nature. Malignant space-occupying lesions of the liver mainly include liver cancer, liver sarcoma and so on, among which liver cancer is the most common. Benign space-occupying lesions of the liver are much less common than malignant space-occupying lesions, accounting for about 5%-10…
Early liver cancer and hepatic hemangioma can be distinguished by B ultrasound	Liver cancer is generally suggested as hypoechoic nodules on B-ultrasound, and a small amount of blood flow signal can be seen in the nodules. The typical small hemangioma is medium echogenic light clusters with uniform density, clear boundaries and regular shape. In cavernous hemangioma, the internal echo intensity was different, and there were anechoic areas with irregular shape and different s…
Does the liver have hemangioma and cyst?	Liver cancer is generally suggested as hypoechoic nodules on B-ultrasound, and a small amount of blood flow signal can be seen in the nodules. The typical small hemangioma is medium echogenic light clusters with uniform density, clear boundaries and regular shape. In cavernous hemangioma, the internal echo intensity was different, and there were anechoic areas with irregular shape and different s…
Liver right anterior lobe lower segment hemangioma, how to treat multiple small cysts in the liver?	Liver cancer is generally suggested as hypoechoic nodules on B-ultrasound, and a small amount of blood flow signal can be seen in the nodules. The typical small hemangioma is medium echogenic light clusters with uniform density, clear boundaries and regular shape. In cavernous hemangioma, the internal echo intensity was different, and there were anechoic areas with irregular shape and different s…
Today civil servant physical examination, B ultrasound detection liver has liver hemangioma, do not know whether the effect	It is recommended to consult the relevant units and legal provisions. Hepatic cavernous hemangioma is the most common benign tumor of the liver. Small asymptomatic hepatic hemangioma does not need treatment, but B-ultrasound examination should be performed every 3 to 6 months to observe the tumor changes dynamically. Surgical resection should be performed in patients with a diameter greater than …
Liver hemangioma is single or multiple	Cavernous hemangioma of the liver is the most common benign tumor of the liver. The disease can be single or multiple, both left and right liver lobes can occur, but the right lobe of the liver is more common. The size of the tumor is different. The small can only be diagnosed under a microscope, and the large can weigh more than 10 kilograms. If the diagnosis of this disease is recommended to th…
How often is liver hemangioma normal in one year?	Cavernous hemangioma of the liver is the most common benign tumor of the liver. The disease develops slowly, and the course of the disease may be several years to decades. There is no evidence that hepatic hemangioma becomes normal at most one year. Small asymptomatic hepatic hemangiomas do not need treatment, but B-ultrasound should be performed every 3 to 6 months to observe the changes of the …
Is hepatic hemangioma a malignant tumor	Cavernous hemangioma of the liver is the most common benign tumor of the liver. It is believed to originate from embryonic vascular hamartoma in the liver, which is caused by some factors, such as steroid hormones, contraceptives and pregnancy. The disease is a benign liver tumor, not cancer, generally will not be cancerous, if the diagnosis of this disease is recommended to the regular hospital …
Is hepatic hemangioma a type of cancer?	Cavernous hemangioma of the liver is the most common benign tumor of the liver. It is believed to originate from embryonic vascular hamartoma in the liver, which is caused by some factors, such as steroid hormones, contraceptives and pregnancy. The disease is a benign liver tumor, not cancer, generally will not be cancerous, if the diagnosis of this disease is recommended to the regular hospital …
Can hepatic hemangioma lesion how to determine is benign or malignant	Cavernous hemangioma of the liver is the most common benign tumor of the liver. It is believed to originate from embryonic vascular hamartoma in the liver, which is caused by some factors, such as steroid hormones, contraceptives and pregnancy. The disease is a benign liver tumor, not cancer, generally will not be cancerous, if the diagnosis of this disease is recommended to the regular hospital …
Why does hepatic hemangioma sometimes see sometimes not see	Hepatic cavernous hemangioma is the most common benign liver tumor. When the hemangioma is small, with many vascular components and close to the density of the liver, it is not easy to see by B-ultrasound examination. It is recommended to go to a regular hospital for enhanced CT or MRI examination to confirm the diagnosis, and the final diagnosis depends on pathology.
The final diagnosis depends on pathology. Benign or malignant liver tumors can be determined by that examination	The initial determination of the nature of a liver tumor is mainly based on the results of enhanced CT or MRI combined with alpha-fetoprotein. If according to the history, symptoms and signs, imaging examination is suspected of malignancy, coupled with abnormal increase in alpha-fetoprotein, it can basically be preliminarily diagnosed as malignant. The final diagnosis depends on the pathological …
Liver tumor, is benign or malignant, can be seen from CT	The initial determination of the nature of a liver tumor is mainly based on the results of enhanced CT or MRI combined with alpha-fetoprotein. If according to the history, symptoms and signs, imaging examination is suspected of malignancy, coupled with abnormal increase in alpha-fetoprotein, it can basically be preliminarily diagnosed as malignant. The final diagnosis depends on the pathological …
What is hepatic aneurysm of hepatic hemangioma	Hepatic cavernous hemangioma is the most common benign tumor of the liver. Small asymptomatic hepatic hemangioma does not need treatment, but B-ultrasound examination should be performed every 3 to 6 months to observe the tumor changes dynamically. Surgical resection should be performed in patients with a diameter greater than 10cm, the possibility of traumatic rupture and massive hemorrhage, or …
Does the S3 segment of the liver belong to a cyst or tumor	Couinaud's segmentation is the most commonly used method in clinical practice. Couinaud's method divides the liver into eight independent segments according to function, each with its own inflow and outflow vessels and bile duct system. The S3 segment is one of the liver segments. Hepatic cyst is a common benign liver disease. There are mainly parasitic and non-parasitic hepatic cysts. Non-parasi…
What precautions do you have for hepatic hemangioma?	Hepatic cavernous hemangioma is the most common benign tumor of the liver. Small asymptomatic hepatic hemangioma does not require treatment, but B-ultrasound examination should be performed every 3 to 6 months to observe the tumor changes dynamically. Surgical resection should be performed in patients with a diameter greater than 10cm, the possibility of traumatic rupture and massive hemorrhage, …
Physical examination finds liver hemangioma, can cancerous change? Will it rupture and bleed?	Hepatic cavernous hemangiomas are the most common benign liver tumors and generally do not become cancerous. Pregnancy can induce rapid enlargement of the tumor, which may increase the risk of spontaneous rupture in the event of an accidental pregnancy or increased abdominal pressure during delivery. There is also the possibility of traumatic rupture and massive hemorrhage. If this disease is dia…
Will liver hemangioma be detected by DR Chest radiography	Hepatic cavernous hemangioma is the most common benign liver tumor, and B-ultrasound is the most commonly used examination method. MRI can detect tumors less than 1cm, presenting as "bulb sign". Liver hemangioma is generally not detected by DR Chest radiography. If this disease is suspected, it is recommended to go to a regular hospital for diagnosis and treatment.
Is hepatic hemangioma a tumor?	Hepatic cavernous hemangioma is the most common benign tumor of the liver. It is believed that it originates from embryonic vascular hamartoma in the liver. Due to the action of some factors, such as taking steroid hormones, contraceptives and women's pregnancy, it causes tumorlike proliferation and formation. If the diagnosis of this disease is recommended to the regular hospital for diagnosis a…
Does hepatic hemangioma belong to liver disease?	Hepatic cavernous hemangioma is the most common benign tumor of the liver. It is believed that it originates from embryonic vascular hamartoma in the liver. Due to the action of some factors, such as taking steroid hormones, contraceptives and women's pregnancy, it causes tumorlike proliferation and formation. If the diagnosis of this disease is recommended to the regular hospital for diagnosis a…
Atypical hemangioma in the right posterior lobe of the liver?	Hepatic cavernous hemangioma is the most common benign tumor of the liver. It is believed that it originates from embryonic vascular hamartoma in the liver. Due to the action of some factors, such as taking steroid hormones, contraceptives and women's pregnancy, it causes tumorlike proliferation and formation. If the diagnosis of this disease is recommended to the regular hospital for diagnosis a…
There is a small hemangioma on the liver to say benign how should I do very serious	Hepatic cavernous hemangioma is the most common benign tumor of the liver. Small asymptomatic hepatic hemangioma does not need treatment, but B-ultrasound examination should be performed every 3 to 6 months to observe the tumor changes dynamically. Surgical resection should be performed in patients with a diameter greater than 10cm, the possibility of traumatic rupture and massive hemorrhage, or …
Got liver hemangioma, how should do?	Hepatic cavernous hemangioma is the most common benign tumor of the liver. Small asymptomatic hepatic hemangioma does not need treatment, but B-ultrasound examination should be performed every 3 to 6 months to observe the tumor changes dynamically. Surgical resection should be performed in patients with a diameter greater than 10cm, the possibility of traumatic rupture and massive hemorrhage, or …
Does liver long liver hemangioma need to be treated	Hepatic cavernous hemangioma is the most common benign tumor of the liver. Small asymptomatic hepatic hemangioma does not need treatment, but B-ultrasound examination should be performed every 3 to 6 months to observe the tumor changes dynamically. Surgical resection should be performed in patients with a diameter greater than 10cm, the possibility of traumatic rupture and massive hemorrhage, or …
Got liver hemangioma how should treat just good?	Hepatic cavernous hemangioma is the most common benign tumor of the liver. Small asymptomatic hepatic hemangioma does not need treatment, but B-ultrasound examination should be performed every 3 to 6 months to observe the tumor changes dynamically. Surgical resection should be performed in patients with a diameter greater than 10cm, the possibility of traumatic rupture and massive hemorrhage, or …
Got liver hemangioma after all need to open surgery?	Hepatic cavernous hemangioma is the most common benign tumor of the liver. Small asymptomatic hepatic hemangioma does not need treatment, but B-ultrasound examination should be performed every 3 to 6 months to observe the tumor changes dynamically. Surgical resection should be performed in patients with a diameter greater than 10cm, the possibility of traumatic rupture and massive hemorrhage, or …
Got liver hemangioma need not need treatment?	Hepatic cavernous hemangioma is the most common benign tumor of the liver. Small asymptomatic hepatic hemangioma does not need treatment, but B-ultrasound examination should be performed every 3 to 6 months to observe the tumor changes dynamically. Surgical resection should be performed in patients with a diameter greater than 10cm, the possibility of traumatic rupture and massive hemorrhage, or …
How does liver hemangioma do?	Hepatic cavernous hemangioma is the most common benign tumor of the liver. Small asymptomatic hepatic hemangioma does not need treatment, but B-ultrasound examination should be performed every 3 to 6 months to observe the tumor changes dynamically. Surgical resection should be performed in patients with a diameter greater than 10cm, the possibility of traumatic rupture and massive hemorrhage, or …
How does the liver hemangioma of child treat?	Hepatic cavernous hemangioma is the most common benign tumor of the liver. Small asymptomatic hepatic hemangioma does not need treatment, but should be every 3 to 6 months to do B ultrasound examination, dynamic observation of tumor changes. Surgical resection should be performed in patients with a diameter greater than 10cm, the possibility of traumatic rupture and massive hemorrhage, or the tum…
How to distinguish between hepatic cyst and hepatic hemangioma?	Hepatic hemangioma is more common in genetic factors, common cavernous hemangioma, less than 5 cm usually asymptomatic, slow growth, increased appetite loss, abdominal distension, nausea and vomiting, B ultrasound, enhanced CT or MRI examination can be diagnosed, if necessary, surgical treatment. The content of hepatic cysts is watery fluid, B ultrasound examination is hypoechoic, usually asympto…
Is there a difference between hepatic hemangioma and hepatic cyst?	Hepatic hemangioma is more common in genetic factors, common cavernous hemangioma, less than 5 cm usually asymptomatic, slow growth, increased appetite loss, abdominal distension, nausea and vomiting, B ultrasound, enhanced CT or MRI examination can be diagnosed, if necessary, surgical treatment. The content of hepatic cysts is watery fluid, B ultrasound examination is hypoechoic, usually asympto…
Are hepatic cysts and hemangiomas the same thing?	Hepatic hemangioma is more common in genetic factors, common cavernous hemangioma, less than 5 cm usually asymptomatic, slow growth, increased appetite loss, abdominal distension, nausea and vomiting, B ultrasound, enhanced CT or MRI examination can be diagnosed, if necessary, surgical treatment. The content of hepatic cysts is watery fluid, B ultrasound examination is hypoechoic, usually asympto…
The difference between hepatic hemangioma and hepatic cyst	Hepatic hemangioma is more common in genetic factors, common cavernous hemangioma, less than 5 cm usually asymptomatic, slow growth, increased appetite loss, abdominal distension, nausea and vomiting, B ultrasound, enhanced CT or MRI examination can be diagnosed, if necessary, surgical treatment. The content of hepatic cysts is watery fluid, B ultrasound examination is hypoechoic, usually asympto…
The difference between hepatic hemangioma and hepatic cyst	Hepatic hemangioma is more common in genetic factors, common cavernous hemangioma, less than 5 cm usually asymptomatic, slow growth, increased appetite loss, abdominal distension, nausea and vomiting, B ultrasound, enhanced CT or MRI examination can be diagnosed, if necessary, surgical treatment. The content of hepatic cysts is watery fluid, B ultrasound examination is hypoechoic, usually asympto…
What is the difference between hepatic hemangioma and hepatic cyst	Hepatic hemangioma is more common in genetic factors, common cavernous hemangioma, less than 5 cm usually asymptomatic, slow growth, increased appetite loss, abdominal distension, nausea and vomiting, B ultrasound, enhanced CT or MRI examination can be diagnosed, if necessary, surgical treatment. The content of hepatic cysts is watery fluid, B ultrasound examination is hypoechoic, usually asympto…
How does hepatic hemangioma and hepatic cyst distinguish	Hepatic hemangioma is more common in genetic factors, common cavernous hemangioma, less than 5 cm usually asymptomatic, slow growth, increased appetite loss, abdominal distension, nausea and vomiting, B ultrasound, enhanced CT or MRI examination can be diagnosed, if necessary, surgical treatment. The content of hepatic cysts is watery fluid, B ultrasound examination is hypoechoic, usually asympto…
Are hepatic hemangioma and hepatic aneurysm the same thing?	Hepatic cavernous hemangioma is the most common benign tumor of the liver. Small asymptomatic hepatic hemangioma does not need treatment, but B-ultrasound examination should be performed every 3 to 6 months to observe the tumor changes dynamically. Surgical resection should be performed in patients with a diameter greater than 10cm, the possibility of traumatic rupture and massive hemorrhage, or …
Is hepatic hemangioma an aneurysm?	Hepatic cavernous hemangioma is the most common benign tumor of the liver. Small asymptomatic hepatic hemangioma does not need treatment, but B-ultrasound examination should be performed every 3 to 6 months to observe the tumor changes dynamically. Surgical resection should be performed in patients with a diameter greater than 10cm, the possibility of traumatic rupture and massive hemorrhage, or …
What is the difference between hepatic hemangioma and hepatic nodule?	Hepatic nodules are caused by the proliferation of fibrous tissue in the liver and the disorder of the arrangement of the liver trabeculae caused by various factors. Hepatic cavernous hemangioma is the most common benign tumor of the liver. Small asymptomatic hepatic hemangioma does not need treatment, but B-ultrasound examination should be performed every 3 to 6 months to observe the tumor chang…
Is hepatic hemangioma cancer?	Cavernous hemangioma of the liver is the most common benign tumor of the liver. It is believed to originate from embryonic vascular hamartoma in the liver, which is caused by some factors, such as steroid hormones, contraceptives and pregnancy. The disease is a benign liver tumor, not cancer, generally will not be cancerous, if the diagnosis of this disease is recommended to the regular hospital …
Is hepatic hemangioma liver cancer? Can be cured?	Cavernous hemangioma of the liver is the most common benign tumor of the liver. It is believed to originate from embryonic vascular hamartoma in the liver, which is caused by some factors, such as steroid hormones, contraceptives and pregnancy. The disease is a benign liver tumor, not cancer, generally will not be cancerous, if the diagnosis of this disease is recommended to the regular hospital …
Does hepatic hemangioma have the possibility of malignancy?	Cavernous hemangioma of the liver is the most common benign tumor of the liver. It is believed to originate from embryonic vascular hamartoma in the liver, which is caused by some factors, such as steroid hormones, contraceptives and pregnancy. The disease is a benign liver tumor, not cancer, generally will not be cancerous, if the diagnosis of this disease is recommended to the regular hospital …
Liver hemangioma grows quickly, and has pain, is it liver cancer	Cavernous hemangioma of the liver is the most common benign tumor of the liver. It is believed to originate from embryonic vascular hamartoma in the liver, which is caused by some factors, such as steroid hormones, contraceptives and pregnancy. The disease is a benign liver tumor, not cancer, generally will not be cancerous, if the diagnosis of this disease is recommended to the regular hospital …
How to judge liver hemangioma is benign or malignant	Cavernous hemangioma of the liver is the most common benign tumor of the liver. It is believed to originate from embryonic vascular hamartoma in the liver, which is caused by some factors, such as steroid hormones, contraceptives and pregnancy. The disease is a benign liver tumor, not cancer, generally will not be cancerous, if the diagnosis of this disease is recommended to the regular hospital …
Is hepatic hemangioma a serious disease?	Hepatic cavernous hemangioma is the most common benign tumor of the liver. Small asymptomatic hepatic hemangioma does not need treatment, but B-ultrasound examination should be performed every 3 to 6 months to observe the tumor changes dynamically. Surgical resection should be performed in patients with a diameter greater than 10cm, the possibility of traumatic rupture and massive hemorrhage, or …
Suspected liver hemangioma, do enhanced CT can not be diagnosed	Cavernous hemangioma of the liver is the most common benign tumor of the liver. Generally, hepatic hemangioma can be detected by enhanced CT. On CT examination, the edge of the lesion of hepatic hemangioma shows high-density enhancement, and the enhancement area is progressive to the center of the lesion, which expands and lasts for a long time. The lesion was round or ovoid with low density, cle…
B ultrasound detection of hepatic hemangioma and liver cancer difference?	Liver cancer is generally suggested as hypoechoic nodules on B-ultrasound, and a small amount of blood flow signal can be seen in the nodules. The typical small hemangioma is medium echogenic light clusters with uniform density, clear boundaries and regular shape. In cavernous hemangioma, the internal echo intensity was different, and there were anechoic areas with irregular shape and different s…
Is there a nodule in the liver definitely a hemangioma?	A nodule in the liver is not necessarily a hemangioma. There may also be benign liver lesions such as focal nodular hyperplasia, and malignant liver lesions such as liver cancer. Hepatic cavernous hemangioma is the most common benign tumor of the liver. Small asymptomatic hepatic hemangioma does not need treatment, but B-ultrasound examination should be performed every 3 to 6 months to observe th…
How to differentiate hepatic hemangioma from fatty liver	Fatty liver refers to the lesions caused by excessive fat accumulation in liver cells due to various reasons. According to the etiology, it can be divided into obese fatty liver, alcoholic fatty liver, rapid weight loss fatty liver, dystrophic fatty liver, diabetic fatty liver, etc. Hepatic cavernous hemangioma is the most common benign liver tumor, which can be identified by medical history, sym…
Can hepatic hemangioma be misdiagnosed as liver cancer?	Hepatic cavernous hemangioma is the most common benign liver tumor, and B-ultrasound is the most commonly used examination method. It is a typical small hemangioma with moderate echo and uniform density. The internal echo intensity of cavernous hemangioma was different. If there was calcification, strong echo with acoustic shadow could be seen. Liver cancer is generally suggested as hypoechoic no…
How is hepatic hemangioma diagnosed	Hepatic cavernous hemangioma is the most common benign liver tumor, and B-ultrasound is the most commonly used examination method. The typical small hemangioma, due to the dense vascular tissue, presents a medium echogenic light cluster, uniform density, clear boundaries, and regular shape. The internal echo intensity of cavernous hemangioma was different. If there was calcification, strong echo …
Breast cancer after operation, chemotherapy 6 times, half a year reexamination has liver cyst and hemangioma, how to do	Hepatic cavernous hemangioma is the most common benign tumor of the liver. Small asymptomatic hepatic hemangioma does not need treatment, but B-ultrasound should be performed every 3 to 6 months to dynamically observe the changes of the tumor. Surgical resection should be performed in patients with a diameter greater than 10cm, the possibility of traumatic rupture and massive hemorrhage, or the t…
Got liver hemangioma what problem should notice?	Hepatic cavernous hemangioma is the most common benign tumor of the liver. Small asymptomatic hepatic hemangioma does not require treatment, but B-ultrasound examination should be performed every 3 to 6 months to observe the tumor changes dynamically. Surgical resection should be performed in patients with a diameter greater than 10cm, the possibility of traumatic rupture and massive hemorrhage, …
Is hepatic right lobe hemangioma serious, what should notice	Hepatic cavernous hemangioma is the most common benign tumor of the liver. Small asymptomatic hepatic hemangioma does not require treatment, but B-ultrasound examination should be performed every 3 to 6 months to observe the tumor changes dynamically. Surgical resection should be performed in patients with a diameter greater than 10cm, the possibility of traumatic rupture and massive hemorrhage, …
How to do liver benign tumor?	For benign liver tumors, if the volume of the tumor is relatively small, and has not caused compression to the surrounding structures, and has not caused a certain impact on the normal function of the liver, if you do not feel any discomfort, usually do not need to treat it, just need regular diagnosis, observation of tumor changes. However, if the volume of the tumor is relatively large, compres…
Are liver cancer and hepatic hemangioma similar?	Cavernous hemangioma of the liver is the most common benign tumor of the liver. It is believed to originate from embryonic vascular hamartoma in the liver, which is caused by some factors, such as steroid hormones, contraceptives and pregnancy. Hepatocellular carcinoma (HCC) is a primary malignant tumor of the liver originating from epithelial tissues, and its pathogenesis is related to liver cir…
How long can exercise after liver hemangioma interventional surgery	Hepatic artery interventional embolization has the advantages of less trauma, less cost, and quick postoperative recovery. Generally, after the removal of the sheath tube, the patients can go to the field for appropriate activities, but the risk of severe exercise and impact that may cause complications should be avoided.
Do you recommend interventional therapy for hepatic hemangioma?	As a benign tumor, hepatic hemangioma is mostly asymptomatic and has no tendency of malignant transformation. In principle, follow-up observation is the main method, which is generally accepted at home and abroad. When the hemangioma is large and combined with risk factors, appropriate treatment is recommended. Surgical resection is currently considered to be the most definitive treatment for hep…
Is interventional therapy or surgical treatment better for hepatic hemangioma?	As a benign tumor, hepatic hemangioma is mostly asymptomatic and has no tendency of malignant transformation. In principle, follow-up observation is the main method, which is generally accepted at home and abroad. When the hemangioma is large and combined with risk factors, appropriate treatment is recommended. Surgical resection is currently considered to be the most definitive treatment for hep…
Is interventional therapy of hepatic hemangioma effective	As a benign tumor, hepatic hemangioma is mostly asymptomatic and has no tendency of malignant transformation. In principle, follow-up observation is the main method, which is generally accepted at home and abroad. When the hemangioma is large and combined with risk factors, appropriate treatment is recommended. Interventional therapy has the advantages of less trauma and faster postoperative reco…
What is the effect of interventional treatment of hepatic hemangioma	As a benign tumor, hepatic hemangioma is mostly asymptomatic and has no tendency of malignant transformation. In principle, follow-up observation is the main method, which is generally accepted at home and abroad. When the hemangioma is large and combined with risk factors, appropriate treatment is recommended. Interventional therapy has the advantages of less trauma and faster postoperative reco…
Is interventional embolization effective in the treatment of hepatic hemangioma	As a benign tumor, hepatic hemangioma is mostly asymptomatic and has no tendency of malignant transformation. In principle, follow-up observation is the main method, which is generally accepted at home and abroad. When the hemangioma is large and combined with risk factors, appropriate treatment is recommended. Interventional embolization has the advantages of less trauma and rapid postoperative …
Is minimally invasive ablation of hepatic hemangioma good?	As a benign tumor, hepatic hemangioma is mostly asymptomatic and has no tendency of malignant transformation. In principle, follow-up observation is the main method, which is generally accepted at home and abroad. When the hemangioma is large and combined with risk factors, appropriate treatment is recommended. Local ablation is a widely used minimally invasive treatment for hepatic hemangioma at…
Which is better, interventional or minimally invasive therapy for hepatic hemangioma?	As a benign tumor, hepatic hemangioma is mostly asymptomatic and has no tendency of malignant transformation. In principle, follow-up observation is the main method, which is generally accepted at home and abroad. When the hemangioma is large and combined with risk factors, appropriate treatment is recommended. Surgical resection is currently considered to be the most definitive treatment for hep…
Will hepatic hemangioma recur after interventional treatment	As a benign tumor, hepatic hemangioma is mostly asymptomatic and has no tendency of malignant transformation. In principle, follow-up observation is the main method, which is generally accepted at home and abroad. When the hemangioma is large and combined with risk factors, appropriate treatment is recommended. Interventional embolization has the advantages of less trauma and rapid postoperative …
Is hepatic hemangioma prone to recur after radiofrequency ablation? What phenomenon does recurrence have?	As a benign tumor, hepatic hemangioma is mostly asymptomatic and has no tendency of malignant transformation. In principle, follow-up observation is the main method, which is generally accepted at home and abroad. When the hemangioma is large and combined with risk factors, appropriate treatment is recommended. Local ablation is a commonly used minimally invasive treatment for hepatic hemangioma,…
How much does minimally invasive treatment of hepatic hemangioma cost?	As a benign tumor, hepatic hemangioma is mostly asymptomatic and has no tendency of malignant transformation. In principle, follow-up observation is the main method, which is generally accepted at home and abroad. When the hemangioma is large and combined with risk factors, appropriate treatment is recommended. The treatment methods of hepatic hemangioma include surgical treatment, local ablation…
Which methods are better for interventional treatment of hepatic hemangioma	Local ablation of liver hemangioma includes percutaneous RFA, laparoscopic or open local ablation of liver hemangioma. Pingyangmycin was brought into and accumulated in the hemangioma sinus by lipiodised oil in the interventional embolization of hepatic artery, so that the hemangioma sinus continued to be embolized, and eventually the tumor was lack of nutrition and gradually hardened and fibrosi…
Postoperative complications and precautions of interventional therapy for liver tumors	Transcatheter arterial embolization has the advantages of less trauma, less cost and rapid postoperative recovery. The short-term effect is relatively definite, but the long-term recurrence rate is relatively high. Transcatheter arterial embolization may also cause ectopic embolization and lead to various complications. After operation, attention should be paid to the protection of the surgical i…
Risks of interventional therapy for liver tumors	The risks of local ablation include bleeding, abscess formation, gastrointestinal perforation, liver failure, bile duct injury, portal vein thrombosis, hemopneumothorax requiring drainage, and so on, with an incidence of 0.6%-8.9%. Too large cauterization area and too long cauterization time are easy to be complicated by hemoglobinuria. The risks of transcatheter arterial embolization include the…
Is reexamination necessary after 1 year of interventional therapy for hepatic hemangioma	Transcatheter arterial embolization has the advantages of less trauma, less cost and rapid postoperative recovery. The short-term efficacy is relatively definite, but the long-term recurrence rate is relatively high. Postoperative ultrasound or CT examination of liver, gallbladder, pancreas and spleen should be performed regularly to observe the recurrence of hepatic hemangioma.
Does hepatic hemangioma affect life span	Hepatic hemangioma is a benign lesion of the liver, without obvious malignant performance and tendency, and generally has no effect on life span. However, if there are serious complications, such as rupture of hepatic hemangioma, thrombocytopenia and hypofibrinogenemia, hepatomegaly, etc., it may affect the health of the body, and in serious cases, it is life-threatening. It is necessary to go to…
How long can you live with liver hemangioma?	Hepatic hemangioma is a benign lesion of the liver, without obvious malignant performance and tendency, and generally has no effect on life span. However, if there are serious complications, such as rupture of hepatic hemangioma, thrombocytopenia and hypofibrinogenemia, hepatomegaly, etc., it may affect the health of the body, and in serious cases, it is life-threatening. It is necessary to go to…
How long can you live after liver tumor resection?	Hepatic hemangioma is a benign lesion of the liver, without obvious malignant performance and tendency, and generally has no effect on life span. However, if there are serious complications, such as rupture of hepatic hemangioma, thrombocytopenia and hypofibrinogenemia, hepatomegaly, etc., it may affect the health of the body, and in serious cases, it is life-threatening. It is necessary to go to…
How long can you live with hemangioma on the liver?	Hepatic hemangioma is a benign lesion of the liver, without obvious malignant performance and tendency, and generally has no effect on life span. However, if there are serious complications, such as rupture of hepatic hemangioma, thrombocytopenia and hypofibrinogenemia, hepatomegaly, etc., it may affect the health of the body, and in serious cases, it is life-threatening. It is necessary to go to…
How long can liver hemangioma 8mmX7mm live to cure	Hepatic hemangioma is a benign lesion of the liver, without obvious malignant transformation and tendency, and generally has no effect on life expectancy. However, if there are serious complications, such as rupture of hepatic hemangioma, thrombocytopenia and hypofibrinogenemia, hepatomegaly, etc., it may affect the health of the body, and in serious cases, it is life-threatening. It is necessary…
Can hepatic hemangioma heal by itself?	Hepatic hemangioma is a benign lesion of the liver, without obvious signs and tendency of malignant transformation, but it will not disappear without treatment. Small asymptomatic hepatic hemangioma does not need treatment, but B-ultrasound examination should be performed every 3 to 6 months to observe the tumor changes dynamically. If the diameter of the tumor is greater than 10cm or there is th…
Does hepatic hemangioma affect the physical examination of civil servants	Can pass, according to "civil servant employment physical examination general standard (trial)" article 7 provisions: all kinds of acute and chronic hepatitis and liver cirrhosis, unqualified. Article 8: Malignant tumor, unqualified. Hepatic hemangioma is a relatively common benign tumor of the liver, which is not classified as acute or chronic hepatitis or malignant tumor and meets the physical …
How does hepatic hemangioma infect?	As a benign tumor, hepatic hemangioma is mostly asymptomatic and has no tendency of malignant transformation. Its pathogenesis is related to the relationship between platelets and endothelial cells, and it is not infectious.
Is hepatic hemangioma infectious?	As a benign tumor, hepatic hemangioma is mostly asymptomatic and has no tendency of malignant transformation. Its pathogenesis is related to the relationship between platelets and endothelial cells, and it is not infectious.
What does liver hemangioma infect notice?	As a benign tumor, hepatic hemangioma is mostly asymptomatic and has no tendency of malignant transformation. Its pathogenesis is related to the relationship between platelets and endothelial cells, and it is not infectious.
Hello, can a hemangioma on the liver grow to infect excuse me	As a benign tumor, hepatic hemangioma is mostly asymptomatic and has no tendency of malignant transformation. Its pathogenesis is related to the relationship between platelets and endothelial cells, and it is not infectious.
Can liver hemangioma infect?	As a benign tumor, hepatic hemangioma is mostly asymptomatic and has no tendency of malignant transformation. Its pathogenesis is related to the relationship between platelets and endothelial cells, and it is not infectious.
Can liver hemangioma be transmitted to others?	As a benign tumor, hepatic hemangioma is mostly asymptomatic and has no tendency of malignant transformation. Its pathogenesis is related to the relationship between platelets and endothelial cells, and it is not infectious.
Can liver hemangioma be transmitted to other people?	As a benign tumor, hepatic hemangioma is mostly asymptomatic and has no tendency of malignant transformation. Its pathogenesis is related to the relationship between platelets and endothelial cells, and it is not infectious.
Is hemangioma of the liver an infectious disease?	As a benign tumor, hepatic hemangioma is mostly asymptomatic and has no tendency of malignant transformation. Its pathogenesis is related to the relationship between platelets and endothelial cells, and it is not infectious.
Can hepatic hemangioma be inherited?	As a benign tumor, hepatic hemangioma is mostly asymptomatic and has no malignant tendency. Its pathogenesis is related to the relationship between platelets and endothelial cells. It is sporadic in the population and has no obvious inheritance.
Can hepatic hemangioma be inherited	As a benign tumor, hepatic hemangioma is mostly asymptomatic and has no malignant tendency. Its pathogenesis is related to the relationship between platelets and endothelial cells. It is sporadic in the population and has no obvious inheritance.
May have four to five years, liver hemangioma does operation to want how much money	As a benign tumor, hepatic hemangioma is mostly asymptomatic and has no malignant tendency. In principle, it is mainly followed up and observed. This is a widely accepted concept at home and abroad. When the hemangioma is large and combined with risk factors, it is recommended to treat it as appropriate. The treatment methods of hepatic hemangioma include surgical treatment, local ablation, and h…
How much does liver hemangioma surgery cost?	As a benign tumor, hepatic hemangioma is mostly asymptomatic and has no malignant tendency. In principle, it is mainly followed up and observed. This is a widely accepted concept at home and abroad. When the hemangioma is large and combined with risk factors, it is recommended to treat it as appropriate. The treatment methods of hepatic hemangioma include surgical treatment, local ablation, and h…
How much does hepatic hemangioma 9cm surgery cost?	As a benign tumor, hepatic hemangioma is mostly asymptomatic and has no malignant tendency. In principle, it is mainly followed up and observed. This is a widely accepted concept at home and abroad. When the hemangioma is large and combined with risk factors, it is recommended to treat it as appropriate. The treatment methods of hepatic hemangioma include surgical treatment, local ablation, and h…
How much does hepatic hemangioma 7cm surgery cost?	As a benign tumor, hepatic hemangioma is mostly asymptomatic and has no malignant tendency. In principle, it is mainly followed up and observed. This is a widely accepted concept at home and abroad. When the hemangioma is large and combined with risk factors, it is recommended to treat it as appropriate. The treatment methods of hepatic hemangioma include surgical treatment, local ablation, and h…
Liver hemangioma operation cost	As a benign tumor, hepatic hemangioma is mostly asymptomatic and has no malignant tendency. In principle, it is mainly followed up and observed. This is a widely accepted concept at home and abroad. When the hemangioma is large and combined with risk factors, it is recommended to treat it as appropriate. The treatment methods of hepatic hemangioma include surgical treatment, local ablation, and h…
Hepatic hemangioma 6.04.5 How much does the operation cost	As a benign tumor, hepatic hemangioma is mostly asymptomatic and has no malignant tendency. In principle, it is mainly followed up and observed. This is a widely accepted concept at home and abroad. When the hemangioma is large and combined with risk factors, it is recommended to treat it as appropriate. The treatment methods of hepatic hemangioma include surgical treatment, local ablation, and h…
Liver hemangioma treatment to how much money	As a benign tumor, hepatic hemangioma is mostly asymptomatic and has no malignant tendency. In principle, it is mainly followed up and observed. This is a widely accepted concept at home and abroad. When the hemangioma is large and combined with risk factors, it is recommended to treat it as appropriate. The treatment methods of hepatic hemangioma include surgical treatment, local ablation, and h…
How much does the treatment cost of liver hemangioma want generally	As a benign tumor, hepatic hemangioma is mostly asymptomatic and has no malignant tendency. In principle, it is mainly followed up and observed. This is a widely accepted concept at home and abroad. When the hemangioma is large and combined with risk factors, it is recommended to treat it as appropriate. The treatment methods of hepatic hemangioma include surgical treatment, local ablation, and h…
How much does liver hemangioma operation need?	As a benign tumor, hepatic hemangioma is mostly asymptomatic and has no malignant tendency. In principle, it is mainly followed up and observed. This is a widely accepted concept at home and abroad. When the hemangioma is large and combined with risk factors, it is recommended to treat it as appropriate. The treatment methods of hepatic hemangioma include surgical treatment, local ablation, and h…
How much does hepatic hemangioma minimally invasive surgery cost?	As a benign tumor, hepatic hemangioma is mostly asymptomatic and has no malignant tendency. In principle, it is mainly followed up and observed. This is a widely accepted concept at home and abroad. When the hemangioma is large and combined with risk factors, it is recommended to treat it as appropriate. The treatment methods of hepatic hemangioma include surgical treatment, local ablation, and h…
5 cm liver hemangioma can do minimally invasive surgery? How much does the operation cost	As a benign tumor, hepatic hemangioma is mostly asymptomatic and has no malignant tendency. In principle, it is mainly followed up and observed. This is a widely accepted concept at home and abroad. When the hemangioma is large and combined with risk factors, it is recommended to treat it as appropriate. The treatment methods of hepatic hemangioma include surgical treatment, local ablation, and h…
Can multiple hepatic hemangioma cause anemia	Anemia can be divided into hemopoiesis, hemorrhagic and hemolytic. The possible causes include hemoglobin synthesis disorder, hemorrhagic anemia and so on. A small number of patients with hepatic hemangioma may cause thrombosis or necrosis in the tumor, which may lead to severe complications such as fever and systemic consumption coagulation. Anemia may occur in this case, it is recommended to go…
How to treat liver hemangioma multiple liver cyst?	Hepatic cyst is one of the common complications of hepatic hemangioma, about 10% of patients with hepatic hemangioma can be complicated by hepatic cyst. Hepatic cysts are mostly caused by congenital causes, which are caused by abnormal development of the bile duct during the embryonic period. A small proportion of liver cysts are caused by trauma and inflammation. Patients with hepatic hemangioma…
Causes of postoperative pain in the wound of hepatic hemangioma	Incision pain after liver hemangioma surgery may be due to poor postoperative recovery of the incision, or it may be due to some other causes of liver surgery. It is recommended to go to a regular hospital to find out the cause of the disease and give timely symptomatic and supportive treatment.
Hepatic hemangioma interventional surgery for more than a year why still pain, and grow up	Transcatheter arterial embolization has the advantages of less trauma, less cost and rapid postoperative recovery. The short-term effect is relatively definite, but the long-term recurrence rate is relatively high. It is recommended to go to a regular hospital for treatment, improve CT, MRI and other related examinations, find out the cause of the patient's pain, evaluate the patient's condition,…
Does the stomach feel bad after liver hemangioma surgery?	Liver hemangioma surgery is risky, postoperative patients in a state of stress may appear gastrointestinal bleeding, stress ulcer and other conditions. In addition, if the stomach or intestine is injured during the operation, it may have a certain impact on the digestive tract. It is recommended to go to a regular hospital to find out the cause of gastrointestinal discomfort, and timely symptomat…
The pain is unbearable after interventional surgery for hepatic hemangioma. Is there any way to relieve it	Interventional embolization of the hepatic artery is a risky treatment. It includes the occurrence of various complications caused by ectopic embolization, postoperative infection, and aggravation of pain in the liver region. Nausea, vomiting, abdominal distension, fever (37.5-38.5 ℃) and other symptoms may occur after interventional therapy. It is recommended to go to a regular hospital to find …
Does playing with hepatic hemangioma cause dizziness?	The possible cause of dizziness may be nervous system disease, internal medicine disease, anemia, cerebral arteriosclerosis, heart disease, coronary heart disease, functional hypoglycemia and so on. Dizziness after liver hemangioma surgery may be caused by postoperative nutritional deficiencies or cardiovascular and cerebrovascular changes. It is recommended to go to a regular hospital to find ou…
Are there big three positive and liver hemangioma serious	As a benign tumor, hepatic hemangioma is mostly asymptomatic and has no tendency of malignant transformation. In principle, follow-up observation is the main treatment. This is a widely accepted concept at home and abroad. When the hemangioma is large and combined with risk factors, it is recommended to treat it as appropriate. If combined with viral hepatitis B, it is recommended to review regul…
If you have a liver hemangioma with a diameter of 4.5 cm, do you want to do surgery	Hepatic hemangioma is a common benign tumor of the liver. Surgical resection is currently considered as the most definitive treatment for hepatic hemangioma, but the indications for resection should be strictly controlled. It is not recommended for asymptomatic patients who strongly require surgical treatment. Patients with tumor size less than 10cm generally do not need surgery, regular outpatie…
Got liver hemangioma how to do, must open knife do surgery	Hepatic hemangioma is a common benign tumor of the liver. Surgical resection is currently considered as the most definitive treatment for hepatic hemangioma, but the indications for resection should be strictly controlled. It is not recommended for asymptomatic patients who strongly require surgical treatment. Patients with tumor size less than 10cm generally do not need surgery, regular outpatie…
Has hepatic hemangioma to be larger than 5cm must want operation to treat?	Hepatic hemangioma is a common benign tumor of the liver. Surgical resection is currently considered as the most definitive treatment for hepatic hemangioma, but the indications for resection should be strictly controlled. It is not recommended for asymptomatic patients who strongly require surgical treatment. Patients with tumor size less than 10cm generally do not need surgery, regular outpatie…
Does hepatic hemangioma need surgery?	Hepatic hemangioma is a common benign tumor of the liver. Surgical resection is currently considered as the most definitive treatment for hepatic hemangioma, but the indications for resection should be strictly controlled. It is not recommended for asymptomatic patients who strongly require surgical treatment. Patients with tumor size less than 10cm generally do not need surgery, regular outpatie…
Liver hemangioma, more than 5 cm large, need surgery?	Hepatic hemangioma is a common benign tumor of the liver. Surgical resection is currently considered as the most definitive treatment for hepatic hemangioma, but the indications for resection should be strictly controlled. It is not recommended for asymptomatic patients who strongly require surgical treatment. Patients with tumor size less than 10cm generally do not need surgery, regular outpatie…
8 cm liver hemangioma need surgery	Hepatic hemangioma is a common benign tumor of the liver. Surgical resection is currently considered as the most definitive treatment for hepatic hemangioma, but the indications for resection should be strictly controlled. It is not recommended for asymptomatic patients who strongly require surgical treatment. Patients with tumor size less than 10cm generally do not need surgery, regular outpatie…
Is hepatic hemangioma necessary to operate	Hepatic hemangioma is a common benign tumor of the liver. Surgical resection is currently considered as the most definitive treatment for hepatic hemangioma, but the indications for resection should be strictly controlled. It is not recommended for asymptomatic patients who strongly require surgical treatment. Patients with tumor size less than 10cm generally do not need surgery, regular outpatie…
The diameter of hepatic hemangioma is 5 cm, can not do the operation?	Hepatic hemangioma is a common benign tumor of the liver. Surgical resection is currently considered as the most definitive treatment for hepatic hemangioma, but the indications for resection should be strictly controlled. It is not recommended for asymptomatic patients who strongly require surgical treatment. Patients with tumor size less than 10cm generally do not need surgery, regular outpatie…
How long can liver hemangioma grow to be operated on?	Hepatic hemangioma is a common benign tumor of the liver. Surgical resection is currently considered as the most definitive treatment for hepatic hemangioma, but the indications for resection should be strictly controlled. It is not recommended for asymptomatic patients who strongly require surgical treatment. Patients with tumor size less than 10cm generally do not need surgery, regular outpatie…
An 8*7.8CM hemangioma grows on the liver, is there a risk of surgery	Hepatic hemangioma is a common benign tumor of the liver. Surgical resection is currently considered as the most definitive treatment for hepatic hemangioma, but the indications for resection should be strictly controlled. It is not recommended for asymptomatic patients who strongly require surgical treatment. Patients with tumor size less than 10cm generally do not need surgery, regular outpatie…
Hepatic hemangioma 5.3cm, need operation excuse me	Hepatic hemangioma is a common benign tumor of the liver. Surgical resection is currently considered as the most definitive treatment for hepatic hemangioma, but the indications for resection should be strictly controlled. It is not recommended for asymptomatic patients who strongly require surgical treatment. Patients with tumor size less than 10cm generally do not need surgery, regular outpatie…
Does hepatic hemangioma 50mm*52mm need operation?	Hepatic hemangioma is a common benign tumor of the liver. Surgical resection is currently considered as the most definitive treatment for hepatic hemangioma, but the indications for resection should be strictly controlled. It is not recommended for asymptomatic patients who strongly require surgical treatment. Patients with tumor size less than 10cm generally do not need surgery, regular outpatie…
Liver hemangioma 8cm or so, surgery is there any risk, what needs to be noted	Hepatic hemangioma is a common benign tumor of the liver. Surgical resection is currently considered as the most definitive treatment for hepatic hemangioma, but the indications for resection should be strictly controlled. It is not recommended for asymptomatic patients who strongly require surgical treatment. Patients with tumor size less than 10cm generally do not need surgery, regular outpatie…
8 cm liver hemangioma surgery to cut the liver?	Hepatic hemangioma is a common benign tumor of the liver. Surgical resection is currently considered as the most definitive treatment for hepatic hemangioma, but the indications for resection should be strictly controlled. It is not recommended for asymptomatic patients who strongly require surgical treatment. Patients with tumor size less than 10cm generally do not need surgery, regular outpatie…
How does liver hemangioma do operation	Hepatic hemangioma is a common benign tumor of the liver. Surgical resection is currently considered as the most definitive treatment for hepatic hemangioma, but the indications for resection should be strictly controlled. It is not recommended for asymptomatic patients who strongly require surgical treatment. Patients with tumor size less than 10cm generally do not need surgery, regular outpatie…
How big liver hemangioma needs surgery, how much is the cost of surgery	Hepatic hemangioma is a common benign tumor of the liver. Surgical resection is currently considered as the most definitive treatment for hepatic hemangioma, but the indications for resection should be strictly controlled. It is not recommended for asymptomatic patients who strongly require surgical treatment. Patients with tumor size less than 10cm generally do not need surgery, regular outpatie…
How big does hepatic hemangioma need surgery?	Hepatic hemangioma is a common benign tumor of the liver. Surgical resection is currently considered as the most definitive treatment for hepatic hemangioma, but the indications for resection should be strictly controlled. It is not recommended for asymptomatic patients who strongly require surgical treatment. Patients with tumor size less than 10cm generally do not need surgery, regular outpatie…
Liver hemangioma Liver hemangioma more than five centimeters, excuse me doctor must do surgery	Hepatic hemangioma is a common benign tumor of the liver. Surgical resection is currently considered as the most definitive treatment for hepatic hemangioma, but the indications for resection should be strictly controlled. It is not recommended for asymptomatic patients who strongly require surgical treatment. Patients with tumor size less than 10cm generally do not need surgery, regular outpatie…
A hemangioma of 7 cm in size grows on the liver to be operated on	Hepatic hemangioma is a common benign tumor of the liver. Surgical resection is currently considered as the most definitive treatment for hepatic hemangioma, but the indications for resection should be strictly controlled. It is not recommended for asymptomatic patients who strongly require surgical treatment. Patients with tumor size less than 10cm generally do not need surgery, regular outpatie…
Can liver hemangioma be treated without operation?	Hepatic hemangioma is a common benign tumor of the liver. Surgical resection is currently considered as the most definitive treatment for hepatic hemangioma, but the indications for resection should be strictly controlled. It is not recommended for asymptomatic patients who strongly require surgical treatment. Patients with tumor size less than 10cm generally do not need surgery, regular outpatie…
Liver hemangioma has grown to 8 cm *7 cm, how to treat excuse me is good?	Hepatic hemangioma is a common benign tumor of the liver. Surgical resection is currently considered as the most definitive treatment for hepatic hemangioma, but the indications for resection should be strictly controlled. It is not recommended for asymptomatic patients who strongly require surgical treatment. Patients with tumor size less than 10cm generally do not need surgery, regular outpatie…
Must be removed below what circumstance hepatic hemangioma?	Hepatic hemangioma is a common benign tumor of the liver. Surgical resection is currently considered as the most definitive treatment for hepatic hemangioma, but the indications for resection should be strictly controlled. It is not recommended for asymptomatic patients who strongly require surgical treatment. Patients with tumor size less than 10cm generally do not need surgery, regular outpatie…
When is it best to operate on hepatic hemangioma?	Hepatic hemangioma is a common benign tumor of the liver. Surgical resection is currently considered as the most definitive treatment for hepatic hemangioma, but the indications for resection should be strictly controlled. It is not recommended for asymptomatic patients who strongly require surgical treatment. Patients with tumor size less than 10cm generally do not need surgery, regular outpatie…
How is liver hemangioma 6CM-5CM treated?	Hepatic hemangioma is a common benign tumor of the liver. Surgical resection is currently considered as the most definitive treatment for hepatic hemangioma, but the indications for resection should be strictly controlled. It is not recommended for asymptomatic patients who strongly require surgical treatment. Patients with tumor size less than 10cm generally do not need surgery, regular outpatie…
Liver hemangioma 7CM with surgery? How much does the operation cost?	Hepatic hemangioma is a common benign tumor of the liver. Surgical resection is currently considered as the most definitive treatment for hepatic hemangioma, but the indications for resection should be strictly controlled. It is not recommended for asymptomatic patients who strongly require surgical treatment. Patients with tumor size less than 10cm generally do not need surgery, regular outpatie…
Can liver hemangioma be operated on?	Hepatic hemangioma is a common benign tumor of the liver. Surgical resection is currently considered as the most definitive treatment for hepatic hemangioma, but the indications for resection should be strictly controlled. It is not recommended for asymptomatic patients who strongly require surgical treatment. Patients with tumor size less than 10cm generally do not need surgery, regular outpatie…
Should liver hemangioma be operated on?	Hepatic hemangioma is a common benign tumor of the liver. Surgical resection is currently considered as the most definitive treatment for hepatic hemangioma, but the indications for resection should be strictly controlled. It is not recommended for asymptomatic patients who strongly require surgical treatment. Patients with tumor size less than 10cm generally do not need surgery, regular outpatie…
In which cases does liver hemangioma require surgery?	Hepatic hemangioma is a common benign tumor of the liver. Surgical resection is currently considered as the most definitive treatment for hepatic hemangioma, but the indications for resection should be strictly controlled. It is not recommended for asymptomatic patients who strongly require surgical treatment. Patients with tumor size less than 10cm generally do not need surgery, regular outpatie…
The size of the hemangioma in the right posterior lobe of the liver requires surgery	Hepatic hemangioma is a common benign tumor of the liver. Surgical resection is currently considered as the most definitive treatment for hepatic hemangioma, but the indications for resection should be strictly controlled. It is not recommended for asymptomatic patients who strongly require surgical treatment. Patients with tumor size less than 10cm generally do not need surgery, regular outpatie…
Your words I am hepatic hemangioma 4,8 * 7,3 need surgery	Hepatic hemangioma is a common benign tumor of the liver. Surgical resection is currently considered as the most definitive treatment for hepatic hemangioma, but the indications for resection should be strictly controlled. It is not recommended for asymptomatic patients who strongly require surgical treatment. Patients with tumor size less than 10cm generally do not need surgery, regular outpatie…
My examination has hepatic hemangioma big 4, 5 cm, can not do the operation?	Hepatic hemangioma is a common benign tumor of the liver. Surgical resection is currently considered as the most definitive treatment for hepatic hemangioma, but the indications for resection should be strictly controlled. It is not recommended for asymptomatic patients who strongly require surgical treatment. Patients with tumor size less than 10cm generally do not need surgery, regular outpatie…
My examination has hepatic hemangioma big 4, 5 cm, can not do the operation?	Hepatic hemangioma is a common benign tumor of the liver. Surgical resection is currently considered as the most definitive treatment for hepatic hemangioma, but the indications for resection should be strictly controlled. It is not recommended for asymptomatic patients who strongly require surgical treatment. Patients with tumor size less than 10cm generally do not need surgery, regular outpatie…
My B ultrasound examination this morning said that hepatic hemangioma 2 cm should not matter, need not need surgery?	Hepatic hemangioma is a common benign tumor of the liver. Surgical resection is currently considered as the most definitive treatment for hepatic hemangioma, but the indications for resection should be strictly controlled. It is not recommended for asymptomatic patients who strongly require surgical treatment. Patients with tumor size less than 10cm generally do not need surgery, regular outpatie…
My B ultrasound examination this morning said that hepatic hemangioma 2 cm should not matter, need not need surgery?	Hepatic hemangioma is a common benign tumor of the liver. Surgical resection is currently considered as the most definitive treatment for hepatic hemangioma, but the indications for resection should be strictly controlled. It is not recommended for asymptomatic patients who strongly require surgical treatment. Patients with tumor size less than 10cm generally do not need surgery, regular outpatie…
Liver hemangioma 3 cm more, now sometimes feel a little pain how to treat	Hepatic hemangioma is a common benign tumor of the liver. Surgical resection is currently considered as the most definitive treatment for hepatic hemangioma, but the indications for resection should be strictly controlled. It is not recommended for asymptomatic patients who strongly require surgical treatment. Patients with tumor size less than 10cm generally do not need surgery, regular outpatie…
Can liver hemangioma be pregnant, how to treat	Hepatic hemangioma is a common benign tumor of the liver. Surgical resection is currently considered as the most definitive treatment for hepatic hemangioma, but the indications for resection should be strictly controlled. It is not recommended for asymptomatic patients who strongly require surgical treatment. Patients with tumor size less than 10cm generally do not need surgery, regular outpatie…
Is hepatic hemangioma right liver 5*4*5cm used for surgery?	Hepatic hemangioma is a common benign tumor of the liver. Surgical resection is currently considered as the most definitive treatment for hepatic hemangioma, but the indications for resection should be strictly controlled. It is not recommended for asymptomatic patients who strongly require surgical treatment. Patients with tumor size less than 10cm generally do not need surgery, regular outpatie…
Pregnant women got liver hemangioma how to do?	Hepatic hemangioma is a common benign tumor of the liver. Surgical resection is currently considered as the most definitive treatment for hepatic hemangioma, but the indications for resection should be strictly controlled. It is not recommended for asymptomatic patients who strongly require surgical treatment. Patients with tumor size less than 10cm generally do not need surgery, regular outpatie…
Does hemangioma on mother-in-law liver need surgery	Hepatic hemangioma is a common benign tumor of the liver. Surgical resection is currently considered as the most definitive treatment for hepatic hemangioma, but the indications for resection should be strictly controlled. It is not recommended for asymptomatic patients who strongly require surgical treatment. Patients with tumor size less than 10cm generally do not need surgery, regular outpatie…
Can hemangioma on the liver become cancerous?	As a benign tumor, hepatic hemangioma is mostly asymptomatic and has no tendency of malignant transformation. In principle, follow-up observation is the main treatment. This is a widely accepted concept at home and abroad. The severity of hepatic hemangioma depends on the growth rate and size of hepatic hemangioma. When the hemangioma is large and has combined risk factors, discretionary treatmen…
Adult liver hemangioma how good ah?	As a benign tumor, hepatic hemangioma is mostly asymptomatic and has no tendency of malignant transformation. In principle, follow-up observation is the main treatment. This is a widely accepted concept at home and abroad. The severity of hepatic hemangioma depends on the growth rate and size of hepatic hemangioma. When the hemangioma is large and has combined risk factors, discretionary treatmen…
Does hepatic hemangioma need to be treated	As a benign tumor, hepatic hemangioma is mostly asymptomatic and has no tendency of malignant transformation. In principle, follow-up observation is the main treatment. This is a widely accepted concept at home and abroad. The severity of hepatic hemangioma depends on the growth rate and size of hepatic hemangioma. When the hemangioma is large and has combined risk factors, discretionary treatmen…
Is hepatic hemangioma benign and does not need treatment?	As a benign tumor, hepatic hemangioma is mostly asymptomatic and has no tendency of malignant transformation. In principle, follow-up observation is the main treatment. This is a widely accepted concept at home and abroad. The severity of hepatic hemangioma depends on the growth rate and size of hepatic hemangioma. When the hemangioma is large and has combined risk factors, discretionary treatmen…
How is liver hemangioma benign to treat?	As a benign tumor, hepatic hemangioma is mostly asymptomatic and has no tendency of malignant transformation. In principle, follow-up observation is the main treatment. This is a widely accepted concept at home and abroad. The severity of hepatic hemangioma depends on the growth rate and size of hepatic hemangioma. When the hemangioma is large and has combined risk factors, discretionary treatmen…
Is the old man liver hemangioma good to treat?	As a benign tumor, hepatic hemangioma is mostly asymptomatic and has no tendency of malignant transformation. In principle, follow-up observation is the main treatment. This is a widely accepted concept at home and abroad. The severity of hepatic hemangioma depends on the growth rate and size of hepatic hemangioma. When the hemangioma is large and has combined risk factors, discretionary treatmen…
What operation is hepatic hemangioma best?	As a benign tumor, hepatic hemangioma is mostly asymptomatic and has no tendency of malignant transformation. In principle, follow-up observation is the main treatment. This is a widely accepted concept at home and abroad. The severity of hepatic hemangioma depends on the growth rate and size of hepatic hemangioma. When the hemangioma is large and has combined risk factors, discretionary treatmen…
Is hemangioma of left liver good to treat?	As a benign tumor, hepatic hemangioma is mostly asymptomatic and has no tendency of malignant transformation. In principle, follow-up observation is the main treatment. This is a widely accepted concept at home and abroad. The severity of hepatic hemangioma depends on the growth rate and size of hepatic hemangioma. When the hemangioma is large and has combined risk factors, discretionary treatmen…
Introduction and treatment of hepatic hemangioma in the right posterior lobe	As a benign tumor, hepatic hemangioma is mostly asymptomatic and has no tendency of malignant transformation. In principle, follow-up observation is the main treatment. This is a widely accepted concept at home and abroad. The severity of hepatic hemangioma depends on the growth rate and size of hepatic hemangioma. When the hemangioma is large and has combined risk factors, discretionary treatmen…
How should hepatic hemangioma be treated best	As a benign tumor, hepatic hemangioma is mostly asymptomatic and has no tendency of malignant transformation. In principle, follow-up observation is the main treatment. This is a widely accepted concept at home and abroad. The severity of hepatic hemangioma depends on the growth rate and size of hepatic hemangioma. When the hemangioma is large and has combined risk factors, discretionary treatmen…
What is hepatic hemangioma treated	As a benign tumor, hepatic hemangioma is mostly asymptomatic and has no tendency of malignant transformation. In principle, follow-up observation is the main treatment. This is a widely accepted concept at home and abroad. The severity of hepatic hemangioma depends on the growth rate and size of hepatic hemangioma. When the hemangioma is large and has combined risk factors, discretionary treatmen…
Does hepatic hemangioma need to be treated?	As a benign tumor, hepatic hemangioma is mostly asymptomatic and has no tendency of malignant transformation. In principle, follow-up observation is the main treatment. This is a widely accepted concept at home and abroad. The severity of hepatic hemangioma depends on the growth rate and size of hepatic hemangioma. When the hemangioma is large and has combined risk factors, discretionary treatmen…
How does hepatic hemangioma get smaller?	As a benign tumor, hepatic hemangioma is mostly asymptomatic and has no tendency of malignant transformation. In principle, follow-up observation is the main treatment. This is a widely accepted concept at home and abroad. The severity of hepatic hemangioma depends on the growth rate and size of hepatic hemangioma. When the hemangioma is large and has combined risk factors, discretionary treatmen…
How is hepatic hemangioma treated	As a benign tumor, hepatic hemangioma is mostly asymptomatic and has no tendency of malignant transformation. In principle, follow-up observation is the main treatment. This is a widely accepted concept at home and abroad. The severity of hepatic hemangioma depends on the growth rate and size of hepatic hemangioma. When the hemangioma is large and has combined risk factors, discretionary treatmen…
How is hepatic hemangioma treated? It doubles more than a year	As a benign tumor, hepatic hemangioma is mostly asymptomatic and has no tendency of malignant transformation. In principle, follow-up observation is the main treatment. This is a widely accepted concept at home and abroad. The severity of hepatic hemangioma depends on the growth rate and size of hepatic hemangioma. When the hemangioma is large and has combined risk factors, discretionary treatmen…
How is liver hemangioma treated best	As a benign tumor, hepatic hemangioma is mostly asymptomatic and has no tendency of malignant transformation. In principle, follow-up observation is the main treatment. This is a widely accepted concept at home and abroad. The severity of hepatic hemangioma depends on the growth rate and size of hepatic hemangioma. When the hemangioma is large and has combined risk factors, discretionary treatmen…
How can liver hemangioma be eliminated as soon as possible	As a benign tumor, hepatic hemangioma is mostly asymptomatic and has no tendency of malignant transformation. In principle, follow-up observation is the main treatment. This is a widely accepted concept at home and abroad. The severity of hepatic hemangioma depends on the growth rate and size of hepatic hemangioma. When the hemangioma is large and has combined risk factors, discretionary treatmen…
How can liver hemangioma be slowly eliminated	As a benign tumor, hepatic hemangioma is mostly asymptomatic and has no tendency of malignant transformation. In principle, follow-up observation is the main treatment. This is a widely accepted concept at home and abroad. The severity of hepatic hemangioma depends on the growth rate and size of hepatic hemangioma. When the hemangioma is large and has combined risk factors, discretionary treatmen…
How does hepatic hemangioma treat best?	As a benign tumor, hepatic hemangioma is mostly asymptomatic and has no tendency of malignant transformation. In principle, follow-up observation is the main treatment. This is a widely accepted concept at home and abroad. The severity of hepatic hemangioma depends on the growth rate and size of hepatic hemangioma. When the hemangioma is large and has combined risk factors, discretionary treatmen…
Hemangioma is on the liver, the size is 2CM*3CM, how to treat?	As a benign tumor, hepatic hemangioma is mostly asymptomatic and has no tendency of malignant transformation. In principle, follow-up observation is the main treatment. This is a widely accepted concept at home and abroad. The severity of hepatic hemangioma depends on the growth rate and size of hepatic hemangioma. When the hemangioma is large and has combined risk factors, discretionary treatmen…
How does liver grow hemangioma	As a benign tumor, hepatic hemangioma is mostly asymptomatic and has no tendency of malignant transformation. In principle, follow-up observation is the main treatment. This is a widely accepted concept at home and abroad. The severity of hepatic hemangioma depends on the growth rate and size of hepatic hemangioma. When the hemangioma is large and has combined risk factors, discretionary treatmen…
How does liver hemangioma do	As a benign tumor, hepatic hemangioma is mostly asymptomatic and has no tendency of malignant transformation. In principle, follow-up observation is the main treatment. This is a widely accepted concept at home and abroad. The severity of hepatic hemangioma depends on the growth rate and size of hepatic hemangioma. When the hemangioma is large and has combined risk factors, discretionary treatmen…
Hello, doctor. Today, I was found to have hepatic hemangioma with a diameter of 4 cm during physical examination. What should I do	As a benign tumor, hepatic hemangioma is mostly asymptomatic and has no tendency of malignant transformation. In principle, follow-up observation is the main treatment. This is a widely accepted concept at home and abroad. The severity of hepatic hemangioma depends on the growth rate and size of hepatic hemangioma. When the hemangioma is large and has combined risk factors, discretionary treatmen…
How is hepatic hemangioma treated	As a benign tumor, hepatic hemangioma is mostly asymptomatic and has no tendency of malignant transformation. In principle, follow-up observation is the main treatment. This is a widely accepted concept at home and abroad. The severity of hepatic hemangioma depends on the growth rate and size of hepatic hemangioma. When the hemangioma is large and has combined risk factors, discretionary treatmen…
How to do liver multiple hemangioma	As a benign tumor, hepatic hemangioma is mostly asymptomatic and has no tendency of malignant transformation. In principle, follow-up observation is the main treatment. This is a widely accepted concept at home and abroad. The severity of hepatic hemangioma depends on the growth rate and size of hepatic hemangioma. When the hemangioma is large and has combined risk factors, discretionary treatmen…
Do multiple hepatic hemangiomas need to be treated?	As a benign tumor, hepatic hemangioma is mostly asymptomatic and has no tendency of malignant transformation. In principle, follow-up observation is the main treatment. This is a widely accepted concept at home and abroad. The severity of hepatic hemangioma depends on the growth rate and size of hepatic hemangioma. When the hemangioma is large and has combined risk factors, discretionary treatmen…
Can multiple hepatic hemangiomas be treated?	As a benign tumor, hepatic hemangioma is mostly asymptomatic and has no tendency of malignant transformation. In principle, follow-up observation is the main treatment. This is a widely accepted concept at home and abroad. The severity of hepatic hemangioma depends on the growth rate and size of hepatic hemangioma. When the hemangioma is large and has combined risk factors, discretionary treatmen…
How to treat liver hemangioma	As a benign tumor, hepatic hemangioma is mostly asymptomatic and has no tendency of malignant transformation. In principle, follow-up observation is the main treatment. This is a widely accepted concept at home and abroad. The severity of hepatic hemangioma depends on the growth rate and size of hepatic hemangioma. When the hemangioma is large and has combined risk factors, discretionary treatmen…
I did a color Doppler ultrasound and found a 1 centimeter hemangioma on the liver. What should I do?	As a benign tumor, hepatic hemangioma is mostly asymptomatic and has no tendency of malignant transformation. In principle, follow-up observation is the main treatment. This is a widely accepted concept at home and abroad. The severity of hepatic hemangioma depends on the growth rate and size of hepatic hemangioma. When the hemangioma is large and has combined risk factors, discretionary treatmen…
How to treat long hemangioma on liver?	As a benign tumor, hepatic hemangioma is mostly asymptomatic and has no tendency of malignant transformation. In principle, follow-up observation is the main treatment. This is a widely accepted concept at home and abroad. The severity of hepatic hemangioma depends on the growth rate and size of hepatic hemangioma. When the hemangioma is large and has combined risk factors, discretionary treatmen…
Does hepatic hemangioma 7.7cm4.7cm need to be treated? How to treat?	As a benign tumor, hepatic hemangioma is mostly asymptomatic and has no tendency of malignant transformation. In principle, follow-up observation is the main treatment. This is a widely accepted concept at home and abroad. The severity of hepatic hemangioma depends on the growth rate and size of hepatic hemangioma. When the hemangioma is large and has combined risk factors, discretionary treatmen…
How is liver hemangioma treated?	As a benign tumor, hepatic hemangioma is mostly asymptomatic and has no tendency of malignant transformation. In principle, follow-up observation is the main treatment. This is a widely accepted concept at home and abroad. The severity of hepatic hemangioma depends on the growth rate and size of hepatic hemangioma. When the hemangioma is large and has combined risk factors, discretionary treatmen…
Grew a hemangioma on liver, how should do	As a benign tumor, hepatic hemangioma is mostly asymptomatic and has no tendency of malignant transformation. In principle, follow-up observation is the main treatment. This is a widely accepted concept at home and abroad. The severity of hepatic hemangioma depends on the growth rate and size of hepatic hemangioma. When the hemangioma is large and has combined risk factors, discretionary treatmen…
What is the effective treatment method that liver hemangioma has?	As a benign tumor, hepatic hemangioma is mostly asymptomatic and has no tendency of malignant transformation. In principle, follow-up observation is the main treatment. This is a widely accepted concept at home and abroad. The severity of hepatic hemangioma depends on the growth rate and size of hepatic hemangioma. When the hemangioma is large and has combined risk factors, discretionary treatmen…
Treatment of hepatic hemangioma	As a benign tumor, hepatic hemangioma is mostly asymptomatic and has no tendency of malignant transformation. In principle, follow-up observation is the main treatment. This is a widely accepted concept at home and abroad. The severity of hepatic hemangioma depends on the growth rate and size of hepatic hemangioma. When the hemangioma is large and has combined risk factors, discretionary treatmen…
What is the best treatment for hepatic hemangioma?	As a benign tumor, hepatic hemangioma is mostly asymptomatic and has no tendency of malignant transformation. In principle, follow-up observation is the main treatment. This is a widely accepted concept at home and abroad. The severity of hepatic hemangioma depends on the growth rate and size of hepatic hemangioma. When the hemangioma is large and has combined risk factors, discretionary treatmen…
How does liver minister hemangioma do	As a benign tumor, hepatic hemangioma is mostly asymptomatic and has no tendency of malignant transformation. In principle, follow-up observation is the main treatment. This is a widely accepted concept at home and abroad. The severity of hepatic hemangioma depends on the growth rate and size of hepatic hemangioma. When the hemangioma is large and has combined risk factors, discretionary treatmen…
How to do liver multiple cyst and hemangioma?	As a benign tumor, hepatic hemangioma is mostly asymptomatic and has no tendency of malignant transformation. In principle, follow-up observation is the main treatment. This is a widely accepted concept at home and abroad. The severity of hepatic hemangioma depends on the growth rate and size of hepatic hemangioma. When the hemangioma is large and has combined risk factors, discretionary treatmen…
Can hepatic cavernous hemangioma still be treated	As a benign tumor, hepatic hemangioma is mostly asymptomatic and has no tendency of malignant transformation. In principle, follow-up observation is the main treatment. This is a widely accepted concept at home and abroad. The severity of hepatic hemangioma depends on the growth rate and size of hepatic hemangioma. When the hemangioma is large and has combined risk factors, discretionary treatmen…
What harm does hepatic hemangioma have? Must be treated?	As a benign tumor, hepatic hemangioma is mostly asymptomatic and has no tendency of malignant transformation. In principle, follow-up observation is the main treatment. This is a widely accepted concept at home and abroad. The severity of hepatic hemangioma depends on the growth rate and size of hepatic hemangioma. When the hemangioma is large and has combined risk factors, discretionary treatmen…
Are multiple hepatic hemangiomas dangerous?	As a benign tumor, hepatic hemangioma is mostly asymptomatic and has no tendency of malignant transformation. In principle, follow-up observation is the main treatment. This is a widely accepted concept at home and abroad. The severity of hepatic hemangioma depends on the growth rate and size of hepatic hemangioma. When the hemangioma is large and has combined risk factors, discretionary treatmen…
Is multiple hepatic hemangiomas serious?	As a benign tumor, hepatic hemangioma is mostly asymptomatic and has no tendency of malignant transformation. In principle, follow-up observation is the main treatment. This is a widely accepted concept at home and abroad. The severity of hepatic hemangioma depends on the growth rate and size of hepatic hemangioma. When the hemangioma is large and has combined risk factors, discretionary treatmen…
Is 1cm liver hemangioma serious?	As a benign tumor, hepatic hemangioma is mostly asymptomatic and has no tendency of malignant transformation. In principle, follow-up observation is the main treatment. This is a widely accepted concept at home and abroad. The severity of hepatic hemangioma depends on the growth rate and size of hepatic hemangioma. When the hemangioma is large and has combined risk factors, discretionary treatmen…
10×9mm liver hemangioma is serious, need how to treat...	As a benign tumor, hepatic hemangioma is mostly asymptomatic and has no tendency of malignant transformation. In principle, follow-up observation is the main treatment. This is a widely accepted concept at home and abroad. The severity of hepatic hemangioma depends on the growth rate and size of hepatic hemangioma. When the hemangioma is large and has combined risk factors, discretionary treatmen…
Is small hepatic hemangioma serious?	As a benign tumor, hepatic hemangioma is mostly asymptomatic and has no tendency of malignant transformation. In principle, follow-up observation is the main treatment. This is a widely accepted concept at home and abroad. The severity of hepatic hemangioma depends on the growth rate and size of hepatic hemangioma. When the hemangioma is large and has combined risk factors, discretionary treatmen…
Last year, no liver hemangioma was found in the physical examination of the unit. This year, the doctor told me that there was a 5.7 cm liver	As a benign tumor, hepatic hemangioma is mostly asymptomatic and has no tendency of malignant transformation. In principle, follow-up observation is the main treatment. This is a widely accepted concept at home and abroad. The severity of hepatic hemangioma depends on the growth rate and size of hepatic hemangioma. When the hemangioma is large and has combined risk factors, discretionary treatmen…
I have liver hemangioma size is 7X6mm has what good treatment program?	As a benign tumor, hepatic hemangioma is mostly asymptomatic and has no tendency of malignant transformation. In principle, follow-up observation is the main treatment. This is a widely accepted concept at home and abroad. The severity of hepatic hemangioma depends on the growth rate and size of hepatic hemangioma. When the hemangioma is large and has combined risk factors, discretionary treatmen…
How does hepatic hemangioma many treat best?	As a benign tumor, hepatic hemangioma is mostly asymptomatic and has no tendency of malignant transformation. In principle, follow-up observation is the main treatment. This is a widely accepted concept at home and abroad. The severity of hepatic hemangioma depends on the growth rate and size of hepatic hemangioma. When the hemangioma is large and has combined risk factors, discretionary treatmen…
How does the hemangioma of one centimeter on right liver flap do?	As a benign tumor, hepatic hemangioma is mostly asymptomatic and has no tendency of malignant transformation. In principle, follow-up observation is the main treatment. This is a widely accepted concept at home and abroad. The severity of hepatic hemangioma depends on the growth rate and size of hepatic hemangioma. When the hemangioma is large and has combined risk factors, discretionary treatmen…
What should be noted about a 2.6-cm hemangioma on the liver	As a benign tumor, hepatic hemangioma is mostly asymptomatic and has no tendency of malignant transformation. In principle, follow-up observation is the main treatment. This is a widely accepted concept at home and abroad. The severity of hepatic hemangioma depends on the growth rate and size of hepatic hemangioma. When the hemangioma is large and has combined risk factors, discretionary treatmen…
Hello, excuse me, is there a big problem within 1cm of hepatic hemangioma	As a benign tumor, hepatic hemangioma is mostly asymptomatic and has no tendency of malignant transformation. In principle, follow-up observation is the main treatment. This is a widely accepted concept at home and abroad. The severity of hepatic hemangioma depends on the growth rate and size of hepatic hemangioma. When the hemangioma is large and has combined risk factors, discretionary treatmen…
My liver right lobe grew a 8*9MM hemangioma how to do	As a benign tumor, hepatic hemangioma is mostly asymptomatic and has no tendency of malignant transformation. In principle, follow-up observation is the main treatment. This is a widely accepted concept at home and abroad. The severity of hepatic hemangioma depends on the growth rate and size of hepatic hemangioma. When the hemangioma is large and has combined risk factors, discretionary treatmen…
Physical examination gives a hemangioma on the liver, how to do	As a benign tumor, hepatic hemangioma is mostly asymptomatic and has no tendency of malignant transformation. In principle, follow-up observation is the main treatment. This is a widely accepted concept at home and abroad. The severity of hepatic hemangioma depends on the growth rate and size of hepatic hemangioma. When the hemangioma is large and has combined risk factors, discretionary treatmen…
Physical examination found to have liver hemangioma, less than a centimeter big, how to do	As a benign tumor, hepatic hemangioma is mostly asymptomatic and has no tendency of malignant transformation. In principle, follow-up observation is the main treatment. This is a widely accepted concept at home and abroad. The severity of hepatic hemangioma depends on the growth rate and size of hepatic hemangioma. When the hemangioma is large and has combined risk factors, discretionary treatmen…
I got liver hemangioma, how to do just good?	As a benign tumor, hepatic hemangioma is mostly asymptomatic and has no tendency of malignant transformation. In principle, follow-up observation is the main treatment. This is a widely accepted concept at home and abroad. The severity of hepatic hemangioma depends on the growth rate and size of hepatic hemangioma. When the hemangioma is large and has combined risk factors, discretionary treatmen…
My right liver grew hemangioma how to do?	As a benign tumor, hepatic hemangioma is mostly asymptomatic and has no tendency of malignant transformation. In principle, follow-up observation is the main treatment. This is a widely accepted concept at home and abroad. The severity of hepatic hemangioma depends on the growth rate and size of hepatic hemangioma. When the hemangioma is large and has combined risk factors, discretionary treatmen…
I have a 9 cm by 7 cm by 6 cm hemangioma in the right posterior lobe of my liver without any sensory treatment	As a benign tumor, hepatic hemangioma is mostly asymptomatic and has no tendency of malignant transformation. In principle, follow-up observation is the main treatment. This is a widely accepted concept at home and abroad. The severity of hepatic hemangioma depends on the growth rate and size of hepatic hemangioma. When the hemangioma is large and has combined risk factors, discretionary treatmen…
Is the liver hemangioma serious?	As a benign tumor, hepatic hemangioma is mostly asymptomatic and has no tendency of malignant transformation. In principle, follow-up observation is the main treatment. This is a widely accepted concept at home and abroad. The severity of hepatic hemangioma depends on the growth rate and size of hepatic hemangioma. When the hemangioma is large and has combined risk factors, discretionary treatmen…
Does hepatic hemangioma need treatment if it does not continue to grow?	As a benign tumor, hepatic hemangioma is mostly asymptomatic and has no tendency of malignant transformation. In principle, follow-up observation is the main treatment. This is a widely accepted concept at home and abroad. The severity of hepatic hemangioma depends on the growth rate and size of hepatic hemangioma. When the hemangioma is large and has combined risk factors, discretionary treatmen…
What if my liver hemangioma grows too fast?	As a benign tumor, hepatic hemangioma is mostly asymptomatic and has no tendency of malignant transformation. In principle, follow-up observation is the main treatment. This is a widely accepted concept at home and abroad. The severity of hepatic hemangioma depends on the growth rate and size of hepatic hemangioma. When the hemangioma is large and has combined risk factors, discretionary treatmen…
Do I need to be hospitalized for liver hemangioma?	As a benign tumor, hepatic hemangioma is mostly asymptomatic and has no tendency of malignant transformation. In principle, follow-up observation is the main treatment. This is a widely accepted concept at home and abroad. The severity of hepatic hemangioma depends on the growth rate and size of hepatic hemangioma. When the hemangioma is large and has combined risk factors, discretionary treatmen…
How should a man get liver hemangioma to treat	As a benign tumor, hepatic hemangioma is mostly asymptomatic and has no tendency of malignant transformation. In principle, follow-up observation is the main treatment. This is a widely accepted concept at home and abroad. The severity of hepatic hemangioma depends on the growth rate and size of hepatic hemangioma. When the hemangioma is large and has combined risk factors, discretionary treatmen…
Do I have a 5 cm hemangioma near the right liver	As a benign tumor, hepatic hemangioma is mostly asymptomatic and has no tendency of malignant transformation. In principle, follow-up observation is the main treatment. This is a widely accepted concept at home and abroad. The severity of hepatic hemangioma depends on the growth rate and size of hepatic hemangioma. When the hemangioma is large and has combined risk factors, discretionary treatmen…
How does my physical examination find hepatic right lobe hemangioma to treat	As a benign tumor, hepatic hemangioma is mostly asymptomatic and has no tendency of malignant transformation. In principle, follow-up observation is the main treatment. This is a widely accepted concept at home and abroad. The severity of hepatic hemangioma depends on the growth rate and size of hepatic hemangioma. When the hemangioma is large and has combined risk factors, discretionary treatmen…
I have a 1.1x1.2 hepatic hemangioma that needs treatment	As a benign tumor, hepatic hemangioma is mostly asymptomatic and has no tendency of malignant transformation. In principle, follow-up observation is the main treatment. This is a widely accepted concept at home and abroad. The severity of hepatic hemangioma depends on the growth rate and size of hepatic hemangioma. When the hemangioma is large and has combined risk factors, discretionary treatmen…
I have liver hemangioma disease, transaminase is also higher, but it is not liver cancer by examination, how should be treated?	As a benign tumor, hepatic hemangioma is mostly asymptomatic and has no tendency of malignant transformation. In principle, follow-up observation is the main treatment. This is a widely accepted concept at home and abroad. The severity of hepatic hemangioma depends on the growth rate and size of hepatic hemangioma. When the hemangioma is large and has combined risk factors, discretionary treatmen…
How to do hemangioma on the right liver?	As a benign tumor, hepatic hemangioma is mostly asymptomatic and has no tendency of malignant transformation. In principle, follow-up observation is the main treatment. This is a widely accepted concept at home and abroad. The severity of hepatic hemangioma depends on the growth rate and size of hepatic hemangioma. When the hemangioma is large and has combined risk factors, discretionary treatmen…
Does hepatic cyst, hepatic hemangioma need to be treated	As a benign tumor, hepatic hemangioma is mostly asymptomatic and has no tendency of malignant transformation. In principle, follow-up observation is the main treatment. This is a widely accepted concept at home and abroad. The severity of hepatic hemangioma depends on the growth rate and size of hepatic hemangioma. When the hemangioma is large and has combined risk factors, discretionary treatmen…
Diagnosis and treatment of hepatic cysts and hepatic hemangiomas	As a benign tumor, hepatic hemangioma is mostly asymptomatic and has no tendency of malignant transformation. In principle, follow-up observation is the main treatment. This is a widely accepted concept at home and abroad. The severity of hepatic hemangioma depends on the growth rate and size of hepatic hemangioma. When the hemangioma is large and has combined risk factors, discretionary treatmen…
Intrahepatic hemangioma, there are many in the liver, larger 12*1. How to treat	As a benign tumor, hepatic hemangioma is mostly asymptomatic and has no tendency of malignant transformation. In principle, follow-up observation is the main treatment. This is a widely accepted concept at home and abroad. The severity of hepatic hemangioma depends on the growth rate and size of hepatic hemangioma. When the hemangioma is large and has combined risk factors, discretionary treatmen…
How to do 2 hemangiomas on the liver?	As a benign tumor, hepatic hemangioma is mostly asymptomatic and has no tendency of malignant transformation. In principle, follow-up observation is the main treatment. This is a widely accepted concept at home and abroad. The severity of hepatic hemangioma depends on the growth rate and size of hepatic hemangioma. When the hemangioma is large and has combined risk factors, discretionary treatmen…
Is there a hemangioma of 8 cm big on the liver harmful to the person seriously	As a benign tumor, hepatic hemangioma is mostly asymptomatic and has no tendency of malignant transformation. In principle, follow-up observation is the main treatment. This is a widely accepted concept at home and abroad. The severity of hepatic hemangioma depends on the growth rate and size of hepatic hemangioma. When the hemangioma is large and has combined risk factors, discretionary treatmen…
How does the hemangioma of 3 centimeter big grow on liver do?	As a benign tumor, hepatic hemangioma is mostly asymptomatic and has no tendency of malignant transformation. In principle, follow-up observation is the main treatment. This is a widely accepted concept at home and abroad. The severity of hepatic hemangioma depends on the growth rate and size of hepatic hemangioma. When the hemangioma is large and has combined risk factors, discretionary treatmen…
How does a hemangioma grow on the liver?	As a benign tumor, hepatic hemangioma is mostly asymptomatic and has no tendency of malignant transformation. In principle, follow-up observation is the main treatment. This is a widely accepted concept at home and abroad. The severity of hepatic hemangioma depends on the growth rate and size of hepatic hemangioma. When the hemangioma is large and has combined risk factors, discretionary treatmen…
Is hemangioma on the liver dangerous?	As a benign tumor, hepatic hemangioma is mostly asymptomatic and has no tendency of malignant transformation. In principle, follow-up observation is the main treatment. This is a widely accepted concept at home and abroad. The severity of hepatic hemangioma depends on the growth rate and size of hepatic hemangioma. When the hemangioma is large and has combined risk factors, discretionary treatmen…
Which department should liver hemangioma hang?	As a benign tumor, hepatic hemangioma is mostly asymptomatic and has no tendency of malignant transformation. In principle, follow-up observation is the main treatment. This is a widely accepted concept at home and abroad. The severity of hepatic hemangioma depends on the growth rate and size of hepatic hemangioma. When the hemangioma is large and has combined risk factors, discretionary treatmen…
Minimally invasive surgery for hepatic hemangioma	At present, the surgical methods can be divided into traditional open surgery and modern minimally invasive surgery, but minimally invasive surgery is not suitable for everyone. Both laparoscopic minimally invasive surgery and robotic minimally invasive surgery have their surgical contraindications. The absolute contraindications of minimally invasive surgery are: 1. Patients who cannot tolerate …
9 cm multiple hepatic hemangioma can do minimally invasive surgery	At present, the surgical methods can be divided into traditional open surgery and modern minimally invasive surgery, but minimally invasive surgery is not suitable for everyone. Both laparoscopic minimally invasive surgery and robotic minimally invasive surgery have their surgical contraindications. The absolute contraindications of minimally invasive surgery are: 1. Patients who cannot tolerate …
Can hepatic hemangioma more than 5cm be treated with minimally invasive surgery?	At present, the surgical methods can be divided into traditional open surgery and modern minimally invasive surgery, but minimally invasive surgery is not suitable for everyone. Both laparoscopic minimally invasive surgery and robotic minimally invasive surgery have their surgical contraindications. The absolute contraindications of minimally invasive surgery are: 1. Patients who cannot tolerate …
Is minimally invasive surgery or open surgery better for hepatic hemangioma	At present, the surgical methods can be divided into traditional open surgery and modern minimally invasive surgery, but minimally invasive surgery is not suitable for everyone. Both laparoscopic minimally invasive surgery and robotic minimally invasive surgery have their surgical contraindications. The absolute contraindications of minimally invasive surgery are: 1. Patients who cannot tolerate …
Is minimally invasive laparoscopic surgery for hepatic hemangioma dangerous?	At present, the surgical methods can be divided into traditional open surgery and modern minimally invasive surgery, but minimally invasive surgery is not suitable for everyone. Both laparoscopic minimally invasive surgery and robotic minimally invasive surgery have their surgical contraindications. The absolute contraindications of minimally invasive surgery are: 1. Patients who cannot tolerate …
Is it better to use minimally invasive surgery or surgery for liver tumors larger than 5 cm	At present, the surgical methods can be divided into traditional open surgery and modern minimally invasive surgery, but minimally invasive surgery is not suitable for everyone. Both laparoscopic minimally invasive surgery and robotic minimally invasive surgery have their surgical contraindications. The absolute contraindications of minimally invasive surgery are: 1. Patients who cannot tolerate …
Is minimally invasive surgery best for hepatic hemangioma?	At present, the surgical methods can be divided into traditional open surgery and modern minimally invasive surgery, but minimally invasive surgery is not suitable for everyone. Both laparoscopic minimally invasive surgery and robotic minimally invasive surgery have their surgical contraindications. The absolute contraindications of minimally invasive surgery are: 1. Patients who cannot tolerate …
Can liver hemangioma be treated with minimally invasive surgery?	At present, the surgical methods can be divided into traditional open surgery and modern minimally invasive surgery, but minimally invasive surgery is not suitable for everyone. Both laparoscopic minimally invasive surgery and robotic minimally invasive surgery have their surgical contraindications. The absolute contraindications of minimally invasive surgery are: 1. Patients who cannot tolerate …
Hemangiomas underwent surgery in danger?	Hepatic hemangioma is a common benign tumor of the liver. Surgical resection is currently considered the most definitive treatment for hepatic hemangioma, but the indications for resection should be strictly controlled. Surgical treatment of hepatic hemangioma has certain risks, including 1. Anesthesia complications: severe complications can lead to shock and endanger life; 2. Uncontrollable blee…
Is it risky to operate on 7-8 cm hepatic hemangioma?	Hepatic hemangioma is a common benign tumor of the liver. Surgical resection is currently considered the most definitive treatment for hepatic hemangioma, but the indications for resection should be strictly controlled. Surgical treatment of hepatic hemangioma has certain risks, including 1. Anesthesia complications: severe complications can lead to shock and endanger life; 2. Uncontrollable blee…
What is the success rate of surgery for hemangioma on the liver	Hepatic hemangioma is a common benign tumor of the liver. Surgical resection is currently considered the most definitive treatment for hepatic hemangioma, but the indications for resection should be strictly controlled. Surgical treatment of hepatic hemangioma has certain risks, including 1. Anesthesia complications: severe complications can lead to shock and endanger life; 2. Uncontrollable blee…
Is the operation of hepatic hemangioma risky	Hepatic hemangioma is a common benign tumor of the liver. Surgical resection is currently considered the most definitive treatment for hepatic hemangioma, but the indications for resection should be strictly controlled. Surgical treatment of hepatic hemangioma has certain risks, including 1. Anesthesia complications: severe complications can lead to shock and endanger life; 2. Uncontrollable blee…
Is hepatic hemangioma surgery risky	Hepatic hemangioma is a common benign tumor of the liver. Surgical resection is currently considered the most definitive treatment for hepatic hemangioma, but the indications for resection should be strictly controlled. Surgical treatment of hepatic hemangioma has certain risks, including 1. Anesthesia complications: severe complications can lead to shock and endanger life; 2. Uncontrollable blee…
Is hepatic hemangioma surgery risky? Can you cure it completely?	Hepatic hemangioma is a common benign tumor of the liver. Surgical resection is currently considered the most definitive treatment for hepatic hemangioma, but the indications for resection should be strictly controlled. Surgical treatment of hepatic hemangioma has certain risks, including 1. Anesthesia complications: severe complications can lead to shock and endanger life; 2. Uncontrollable blee…
Liver hemangioma surgery can be dangerous ah	Hepatic hemangioma is a common benign tumor of the liver. Surgical resection is currently considered the most definitive treatment for hepatic hemangioma, but the indications for resection should be strictly controlled. Surgical treatment of hepatic hemangioma has certain risks, including 1. Anesthesia complications: severe complications can lead to shock and endanger life; 2. Uncontrollable blee…
What does the operation risk of hepatic hemangioma have to do with?	Hepatic hemangioma is a common benign tumor of the liver. Surgical resection is currently considered the most definitive treatment for hepatic hemangioma, but the indications for resection should be strictly controlled. Surgical treatment of hepatic hemangioma has certain risks, including 1. Anesthesia complications: severe complications can lead to shock and endanger life; 2. Uncontrollable blee…
Is hepatic hemangioma surgery dangerous?	Hepatic hemangioma is a common benign tumor of the liver. Surgical resection is currently considered the most definitive treatment for hepatic hemangioma, but the indications for resection should be strictly controlled. Surgical treatment of hepatic hemangioma has certain risks, including 1. Anesthesia complications: severe complications can lead to shock and endanger life; 2. Uncontrollable blee…
Surgical methods for hepatic hemangioma	Hepatic hemangioma is a common benign tumor of the liver. Surgical resection is currently considered the most definitive treatment for hepatic hemangioma, but the indications for resection should be strictly controlled. There are two surgical methods, open surgery and laparoscopic surgery. The surgical procedures include hemangioma enucleation, irregular liver resection, segmental or hemihepatect…
Should the liver be removed for hepatic hemangioma?	Hepatic hemangioma is a common benign tumor of the liver. Surgical resection is currently considered the most definitive treatment for hepatic hemangioma, but the indications for resection should be strictly controlled. There are two surgical methods, open surgery and laparoscopic surgery. The surgical procedures include hemangioma enucleation, irregular liver resection, segmental or hemihepatect…
What are the precautions for patients with hepatic hemangioma after operation?	Hepatic hemangioma is a common benign tumor of the liver. Postoperative nutrition should be gradually transferred from parenteral nutrition to enteral nutrition. Generally, liquid or semi-liquid diet can be given after 2 to 3 days and then gradually returned to normal diet. In the diet to eat more fruits and vegetables, do not drink alcohol. After treatment, you should pay attention to control yo…
How should a child check out to have liver hemangioma?	Hepatic cavernous hemangioma is the most common benign tumor of the liver. The disease progresses slowly and has a good prognosis. The most dangerous complication is spontaneous rupture of hemangioma, which is more common in infants. Therefore, after the diagnosis of neonatal hepatic cavernous hemangioma, it is recommended to go to a formal hospital for treatment, and the hepatobiliary surgery or…
How to check out to have liver hemangioma during pregnancy	Hepatic cavernous hemangioma is the most common benign tumor of the liver. Small asymptomatic hepatic hemangioma does not require treatment, but B-ultrasound should be performed every 3 to 6 months to dynamically observe the changes of the tumor. Surgical resection should be performed in patients with a diameter greater than 10cm, the possibility of traumatic rupture and massive hemorrhage, or th…
Liver hemangioma surgery needs a few days of hospitalization?	Hepatic hemangioma is a relatively common benign tumor of the liver. Surgical resection is currently considered to be the most definitive treatment for hepatic hemangioma. The operation can be divided into open surgery and laparoscopic surgery. The postoperative recovery of open surgery is slower, and the patients can be discharged from hospital after 6 to 10 days. The postoperative recovery of l…
The patients were discharged in a few days after minimally invasive surgery for hepatic hemangioma	Hepatic hemangioma is a common benign tumor of the liver. Surgical resection is currently considered to be the most definitive treatment for hepatic hemangioma. The postoperative recovery of laparoscopic surgery is faster, and the patients can be discharged from hospital 4 to 7 days after surgery when their condition is stable. However, the length of hospital stay may be prolonged if there are po…
Is there a multiple uterine fibroids suitable for liver hemangioma surgery? The family is worried	Cavernous hemangioma of the liver is the most common benign tumor of the liver. It is believed to originate from embryonic vascular hamartoma in the liver, which is caused by some factors, such as steroid hormones, contraceptives, and pregnancy. This disease is more common in women and can occur at any age, but it is more common in the age of 30-50 years. The tumor may be asymptomatic when it is …
Need to remove uterus, but have liver hemangioma, can have effect	Cavernous hemangioma of the liver is the most common benign tumor of the liver. It is believed to originate from embryonic vascular hamartoma in the liver, which is caused by some factors, such as steroid hormones, contraceptives, and pregnancy. This disease is more common in women and can occur at any age, but it is more common in the age of 30-50 years. The tumor may be asymptomatic when it is …
Liver cirrhosis has hemangioma again excuse me where is the best hospital in the country, what hospital	There are many causes of liver cirrhosis, which can be divided into viral hepatitis cirrhosis, alcoholic cirrhosis, metabolic cirrhosis, cholestatic cirrhosis, hepatic venous reflux obstruction cirrhosis, autoimmune cirrhosis, poison and drug induced cirrhosis, malnutrition cirrhosis, cryptogenic cirrhosis, etc. As a benign tumor, hepatic hemangioma is mostly asymptomatic, and has no tendency to …
[truncated: 3,396 more rows]

## Sheet: Undeleted category 4289
question	answer
[truncated: 4,288 more rows]

## Sheet: category
Coding	Category of questions	Answer Interpretation
[truncated: 13 more rows]
