# Supplementary material for: Double-target self-supervised clustering with multi-feature fusion for medical question texts
Source: PeerJ Comput Sci. 2024 Jun 28;10:e2075. doi: 10.7717/peerj-cs.2075 (PMC11637006; doi:10.7717/peerj-cs.2075)
Supplement: Supplemental Information 3 [file peerj-cs-10-2075-s003.xlsx]

## Sheet: Corpus on liver cancer issues
The problem
A second recurrence after surgical resection of a primary liver cancer
I greatly advanced liver cancer, has liver ascites can also be treated at the beginning said lumbago
There is a problem on the liver that needs what check
What to pay attention to after liver cancer surgery diet
What preparation should be done before radiofrequency ablation of liver cancer
There are several types of liver cancer
What are the common serious complications of liver cancer in clinic
How long does the liver cancer have fever and stomachache after interventional therapy
What are the precautions during interferon therapy
What items should be checked after liver cancer surgery
What should be paid attention to in the follow-up of chest tightness after liver cancer intervention
How long can radiofrequency ablation of liver cancer recover
The doctor said that the preliminary diagnosis was liver cancer
The cost and effect of interventional therapy after liver cancer surgery are good
Can "argon-helium knife" be used to treat liver cancer
What are the indications for trisegmentectomy
How to care for secondary liver cancer after interventional therapy
Got liver cancer what should diet notice
Determine whether liver cancer should do what examination
Liver cancer resection, liver cirrhosis, big three Yang, ask the index of check below now serious
B ultrasound twice, can you say this is liver cancer
Treatment liver slip operation which hospital is good
What are the effects of radiofrequency ablation on the liver area
How can liver cancer relapse in two months be controlled
Liver cancer can be cured
What causes liver injury
Regular hospital treatment of liver cancer price
Which nutrient solution should be transfused in advanced stage of metastatic liver cancer
Which liver tumors are suitable for laparoscopic surgery
What are the indications and contraindications of interventional therapy for liver cancer
When can small liver cancer do interventional therapy and radiofrequency ablation
Liver cancer after interventional therapy for a week can eat fish
Must radiofrequency ablation be done after liver cancer interventional therapy
Provincial people's hospital treats liver tumor how much money
More and more red spots on the body, Baidu said that there is a problem with the liver
Suspected liver cancer need to pay attention to what problems
What are the clinical manifestations of liver failure
Which is better for the treatment of liver cancer with radiofrequency ablation or surgical resection
Can Gamma knife surgery treat liver cancer and liver metastases
What diseases can be detected by color Doppler ultrasound of liver, gallbladder, spleen, kidney and pancreas
125 iodine particles in the treatment of liver cancer should note what
What are the advantages of Da Vinci robotic surgery in the treatment of liver cancer
What problems should be paid attention to on the diet of liver cancer
Is the recurrence rate of liver cancer after radiofrequency ablation high
What do you notice on diet for advanced liver cancer with abdominal pain and abdominal distension
Can food mildew induce liver cancer
Can radiofrequency ablation cure liver cancer
Pain after regorafenib for liver cancer
Which hospital is the best to treat liver tumors
What tests are needed for chronic abdominal pain
Surgical Hospital for treating liver tumors
Can radiofrequency ablation of liver cancer be repeated
Which is better for the treatment of liver cancer with gamma knife radiotherapy or radiofrequency ablation
How to care for liver cancer after surgical resection
Liver cancer and which dietary habits are related
Is liver cancer surgery for everyone
What tests to do if liver cancer is suspected
Is radiofrequency ablation of liver cancer painful
Is interventional therapy necessary after surgical resection of liver cancer
What minimally invasive surgery for liver cancer includes
See liver cancer patient excuse me, what thing is more appropriate
Liver cancer does radiofrequency ablation can live a few years
What are the advantages of argon-helium knife cryoablation therapy for liver cancer
What are the dietary contraindications and precautions for patients with liver disease
Is the stabbing pain under the right ribs liver cancer
What to look out for after early liver cancer symptoms
Can estrogen and progestogen be taken orally in liver transplant patients with liver cancer
Which organs do liver cancer easily metastasize to
After radiofrequency ablation treatment of liver cancer
Liver cancer recurred 2 months after operation
What should be paid attention to in palpation of liver cancer
What tests are needed to diagnose liver cancer
How long does it take for liver cancer to recover from interventional surgery
Whether liver cancer can be resected
Can a chest X-ray detect liver cancer
How to intervene in several complicated cases of advanced liver cancer
Does radiofrequency ablation of liver cancer have a high success rate
What do liver cancer patients need to pay attention to in terms of diet after interventional therapy
What should be paid attention to in the first course of liver cancer
Is liver resection risky
What tests should be done before radiofrequency ablation of liver cancer
Is the pain under the right ribs in the upper abdomen liver cancer
Got liver cancer on diet should notice what good
Liver cancer patients need to do what to prepare for liver transplantation
Does liver cancer cause serious gastrointestinal bleeding
What are the main routes through which liver cancer metastasize
What are the adverse reactions of radiofrequency ablation for liver cancer
Can advanced liver cancer be treated conservatively
What precautions should be taken for patients with advanced liver cancer after minimally invasive surgery
How can advanced liver cancer be treated to relieve the suffering of patients
What are the advantages of iodine-125 seed implantation in the treatment of liver cancer
How long can interventional therapy be performed after radiofrequency ablation of liver cancer
Who should pay the most attention to prevention of liver cancer
How long should the interval of interventional therapy for liver cancer be
What should be paid attention to after liver cancer metastasis to the lung
Why do liver cancer cells metastasize
Can liver cancer chemotherapy kill cancer cells completely
What to do before liver cancer surgery
Treat liver cancer surgery to the best hospital
What preparations should be made before liver cancer surgery
Treatment of liver cancer specialized hospitals
Liver cancer bone metastasis, excuse me how to treat the next step.
That hospital has the best treatment for liver cancer
Is radiofrequency ablation effective in the treatment of liver cancer
Which HCC patients are eligible for minimally invasive techniques
What are the oxaliplatin chemotherapy options available
How long to recover after liver cancer interventional therapy
What are the interventional treatment of liver cancer and how many times to do it
Can interventional therapy be performed for metastatic liver cancer
What are the causes of subcostal pain in the right abdomen
What should be noted on liver cancer diet
Suspected liver cancer to do what examination
What to pay attention to in liver cancer inhalation
What are the precautions after minimally invasive liver surgery
Is it safe to have no recurrence of liver cancer after interventional treatment for 5 years
Liver cancer do what examination can detect come
What are the indications for radiofrequency ablation of tumors
After liver cancer operation can take ginseng one capsule need to take how long
What reexaminations are needed after radiofrequency ablation of liver cancer
What tests are needed to confirm liver cancer
What tests are needed before liver cancer surgery
B-ultrasonography of liver cancer in its early stage
Can small liver cancer not recur in 5 years be good
Is tongue base green tendon black liver cancer
What are the cautions of right hemihepatectomy
Which diseases are easily misdiagnosed as liver cancer
How long can early liver cancer surgery recover to be cohabitated
How to reduce the pain of advanced liver cancer
Liver cirrhosis patients with advanced liver cancer hospital said that the maximum three months of pain
Where does liver cancer usually metastasize
What are the worries and shortcomings of the treatment plan of various liver cancer how to choose
Liver cancer appetite is good need to pay attention to what problems
Liver cancer patients in the diet should pay attention to what problems
Can radiofrequency ablation be combined with surgery to treat liver cancer
What are the possible adverse reactions of radiofrequency ablation in the treatment of liver cancer
Determining which enzymes can assist in the diagnosis of liver cancer
What are the indications of minimally invasive interventional therapy for liver cancer
What are the cautions of ultrasound-guided microwave ablation in the treatment of liver cancer
What should be the next step in the treatment of liver cancer
What are the causes of right abdominal pain
Can liver cancer be controlled
Liver cancer is easy to metastasize to which organs
The differential diagnosis of liver cancer with which diseases
How to avoid misdiagnosis of liver cancer
What are the tumor marker tests for women
What problems should be paid attention to in advanced liver cancer
Is the dry cough more than a month after early liver cancer surgery recurrence
What preparation is needed before liver cancer surgery
How often to get out of bed for liver interventional surgery
Liver cancer does interventional what response
How long to do radiofrequency ablation after liver cancer embolization interventional therapy
Whether the systemic bone pain has metastasis within 5 years after liver cancer operation
Radiofrequency ablation or microwave ablation for the treatment of liver cancer
Liver cancer diet need to pay attention to what problems
What are the relevant auxiliary examinations of primary liver cancer
What are the causes of right upper abdominal pain
What tests are needed to confirm liver cancer
Liver cancer diet should pay attention to what problems
What are the conditions for liver transplantation
Liver cancer is treated several times a month
Can radiofrequency ablation eradicate liver cancer
To which organs does liver cancer metastasize
What should we pay attention to after precise liver resection
Treatment of liver cancer which hospital is good
Liver cancer face white and anemia face white, can be seen
Liver cancer can do a few interventions
What examinations should be done before hepatic vascular intervention
Questions to know about liver cancer
Which hospital is the best to go to for liver cancer treatment
Which hospital treats liver cancer
Hospital treatment of liver cancer prices
What are the nursing after interventional microwave ablation
Causes of occasional stinging pain in the hepatic region
Causes of pain in the liver region of running
Got liver cancer what should notice on diet
B liver, mother-to-child spread, the year before last, the mother checked out early liver cancer, has been cured
Liver cancer lung metastasis has what clinical manifestation
How long does the process of liver cirrhosis to liver cancer probably take
Liver cancer, recent bone pain, took a piece, excuse me is transferred
What should the patient of liver cancer notice on diet at ordinary times
Can liver cancer metastatic lung eat bird's nest
How is right lower abdominal pain to return a responsibility after liver cancer operation
Liver examination ct is better or b ultrasound is better
How to treat advanced liver cancer with liver pain and abdominal distension and vomiting
How to care after liver metastasis surgery
What examination is needed to diagnose liver cancer
Liver cancer metastasis lymphoma do not eat anything
Draw blood to check tumor marker to be able to detect cancer
What time should be rechecked after liver cancer intervention
How long after liver cancer surgery usually start metastasis or recurrence
Under what circumstances should patients with liver cancer undergo open surgery combined with radiofrequency ablation
Is radiofrequency ablation prior to liver transplantation for liver cancer good
How to care for radiofrequency ablation of liver cancer
Early liver cancer has been cured by interventional therapy and radiofrequency ablation.
Where is liver pain generally located
What are the advantages of iodine 125 particles in the treatment of liver cancer
Better treatment of liver cancer hospital
What are the indications for intensity modulated radiation therapy
B-ultrasound precautions for liver cancer
Where to treat liver slip operation is better
What are the contraindications of liver transplantation
About taking Ganfule after liver cancer surgery
Liver cancer patients with large appetite need to pay attention to what problems
Primary liver cancer in what circumstances need surgery and need to pay attention to what
What are the factors affecting the treatment of liver cancer with gamma knife
I want to check whether I have liver cancer and what kind of tests I need to do
Vomiting after interventional surgery for liver cancer
Liver cancer surgery, according to now more than a year, disease details are done by MR Imaging
You can tell if you have liver cancer by checking the level of alpha-fetoprotein
Liver cancer chemotherapy can live how long
Multiple liver tumors, cirrhosis, hepatic ascites
How long can women live with hepatitis B
Can multiple liver cancer cure how long can live
How long can advanced liver cancer ascites live
How long does liver cirrhosis turn into liver cancer
How long do people with liver disease live
How long you can live with advanced liver cancer
How long can patients live with early-stage liver cancer
How long can hepatitis B carriers live
How long can you live after liver cancer surgery
How long can you live after surgery for advanced liver cancer
How long can you live with the treatment of advanced liver cancer
How long does hepatitis B develop into liver cancer
How long can you live with cancer edema
How long you can live after a liver replacement
How many hepatitis B patients are there in China
How long can patients live after interventional treatment of liver cancer
How long can hepatic encephalopathy live
7 physical examination tumor found high alpha fetoprotein
How long is hepatitis B survival
Can liver cancer patient eat soft-shelled turtle
How long is the survival time of liver transplantation
In the middle stage of liver cancer, how long can women survive
What are the symptoms of polygenic liver cancer
How long can liver cancer live generally
How long can you take targeted drugs for liver cancer
What is the normal value of liver function ALT
How long do people with hepatitis C live
How long do hepatitis B patients live
How long can you live with chronic hepatitis B
How long is the survival period of foot edema in advanced liver cancer
How much is the possibility of cure in the middle stage of liver cancer
How long can early liver cancer live at most
How long can you live with hepatitis B cirrhosis
How long can patients with liver cancer live after interventional therapy
How long can viral hepatitis B live
How long can you live with hepatitis
How long can you live with liver cancer
How long can hepatitis B live by drinking regularly
How long can you live with advanced liver cancer ascites
How long can patients live with advanced cancer
How long can you live with viral hepatitis B
How long will hepatitis B antiviral treatment take
Can fatty liver cause elevated alpha-fetoprotein levels
How many years can you live without treatment of hepatitis B
How long can you live with liver cancer
How long does the third stage of liver and brain disease survive
Liver cancer is advanced how long to eat Chinese herbal medicine
How long can you live in the middle of liver cancer
How long to live in the early stage of multiple liver cancer
How long is the survival of cirrhotic bleeding
How long can liver cancer survive by vomiting blood
How long can liver cancer live in the middle stage
How long can you live with chronic hepatitis
How long is the incubation period of liver cancer
How long do patients with advanced liver cancer live
How long can a hepatitis C patient live
How long can a liver cancer patient live with hematemesis
How long can you live after liver resection in advanced liver cancer
How much is the normal value of human leucocyte
Liver cancer foot swelling still can live how long
How long can patients with hepatitis B live
How long can cancer patients live
How long can you live with hepatitis B resistance
How long can you live in the middle stage of cirrhosis
How long can you live with malignancy
How long can people who have their livers removed live
How long can cancer live with itchy skin
Liver cancer advanced hematemesis survival is how long
How long can the advanced stage of primary liver cancer live
How long is interventional therapy for small hepatocellular carcinoma
How long is the survival time of brain metastases
Symptoms of advanced liver cancer, and how long to live
How long can moderately differentiated liver cancer live
How long can you live with advanced liver cancer
The most you can live with liver cancer
Can normal liver function get liver cancer
How long can primary liver cancer live
How long can primary liver cancer live
How long can advanced liver cancer live
How long can you live with viral hepatitis
What is the average survival time for liver cancer
How long do you live in advanced liver cancer
How long can you live with interventional treatment of liver cancer
What is the normal value of ADA
Can liver function tests detect liver cancer
Is severe fatty liver serious
? What are low-density nodules in the liver
Can hepatitis B carrier be contagious
Can color ultrasonographic check cirrhosis and liver cancer
b ultrasound examination of moderate fatty liver can get liver cancer
Where is the position of the left lobe of liver
Does eating birch bile have an effect on liver cancer
How to care for liver cancer ablation surgery
Do liver function test can detect liver cancer
Is acute hepatitis serious
Liver cancer general liver function which a few items can be high
Can hepatitis infect
C liver and B liver both have what distinction
How to care for metastatic liver cancer
Does cirrhosis turn into liver cancer
How is liver area dull ache to return a responsibility
What effect does liver cancer plase show
What reason is liver function impaired
Can fatty liver heal itself
Can interferon treat chronic hepatitis B
In addition to hepatitis B and fatty liver what cause transaminase to be on the high side
What does fatty liver diet contraindication have
Do you have any side effects on the liver
Can an 84-year-old patient with liver cancer have surgery
Is a low-density lesion of the liver cancer
What is the reason why patients with liver cancer feel dyspnea
How to carry out nursing work for patients with liver cancer
Will fatty liver gradually develop into liver cancer
? Do many people get nodules on the liver
Can liver cancer patient appear liver failure
Is emphysema metastasis found in patients with liver cancer
Why does liver cancer patient appear jaundice
Can normal liver function still get liver cancer
Liver cancer how long color ultrasound can be detected
Can the cornea of liver cancer patients be used
How is mild fatty liver checked
AFP is always within the normal range. It may be liver cancer
Could fatty liver cause this liver cancer
What are the causes and hazards of high aspartate aminotransferase
How to return a responsibility with multiple low density nodules in liver
Does cirrhosis turn into liver cancer
Can B liver smoke
Can hepatitis certainly transform into liver cancer
Is the bleeding from the liver severe
Will cirrhosis evolve into liver cancer
Moderate fatty liver, what should diet notice can turn to liver cancer
Why liver cancer interventional tumor will shrink by half
Do liver cancer ablation procedures have a high success rate
Does hepatitis eventually develop into liver cancer
Cm liver nodule is liver cancer
Can liver bile duct dilatation be cured
Do patients with cirrhosis progress to liver cancer
Can liver function also diagnose liver cancer
Is it possible for severe fatty liver to transform into liver cancer
Low density shadow is likely to have liver cancer
Can Longya Gantai treat liver cancer
Can hepatobiliary spleen color ultrasound check liver cancer
Can liver cancer be transfused fat emulsion
Is eating cordyceps sinensis good for liver cancer patients
C and B hepatitis which serious
How to return a responsibility with diffuse lesion inside liver
Get B liver serious
Liver cancer can endanger life ah
Is the operation success rate of intrahepatic cholangiocarcinoma high
What is the principle of iodine-125 particles in the treatment of liver cancer
How is medium fatty liver checked
Is the liver tumor serious
How often liver cirrhosis with nodules is easy to become cancerous
Can long-term stagnation of liver qi cause liver cancer
Is hepatomegaly serious
Small three Yang liver function normal can get liver cancer
What is the harm of serious fatty liver
Can iron ions be removed from the body to treat liver cancer
Now I am a hepatitis B patient, and there is nothing wrong with my body.
What causes hepatitis to easily turn into liver cancer
Does liver cancer affect liver function
Will hepatitis evolve into liver cancer
Will the degree of liver cirrhosis be aggravated after radiotherapy in patients with liver cancer
What are the hazards of high liver function indicators
Can liver cancer be detected more than super
Can liver cancer have diarrhea
Fatty liver can cancerous change
Is nodular liver cancer serious
How to return a responsibility with multiple low density foci in the liver
What items should be checked in second liver
Will hepatitis become liver cancer? Will the hepatitis that has treatment not become liver cancer
Will alcoholic liver turn into liver cancer
Is it expensive to treat liver cancer with microwave ablation
Are liver function indicators important in patients with liver cancer
Can liver function test detect liver cancer
Liver hemangioma can become liver cancer
Can long-acting interferon cure chronic hepatitis B
Can the hypoechoic area of the liver be cancer? There are several possibilities for the hypoechoic area of the liver
How is transaminase of liver function high return a responsibility
Be infected B liver how many years will transform liver cancer
Is the success rate of intrahepatic cholangiocarcinoma surgery high
Why regular examination for chronic hepatitis B management
Is hepatic angiosarcoma serious
Can liver cancer eat salad
Can liver cancer cause an abscess
Can liver cancer liver ascites discharge stool infect
Will advanced liver cancer intervention aggravate liver ascites
Can abnormal liver function get liver cancer
Can liver metaplasia cause liver cancer
Is a negative liver tumor serious
How to care for small liver cancer
How long should hepatitis evolve into liver cancer generally
How much glutamic acid transaminase is high can be judged to be liver cancer
Is the liver cancer that causes excuse me to be able to infect in the middle period
B ultrasound can exclude liver cancer
Will hepatic cysts transform into liver cancer
What does chronic liver failure mean by decompensated period
Alanine aminotransferase on the high side how much is hepatitis
Check liver function to find cancer
B liver body check what item
Can play antibody after liver cancer changes liver infect
Fucosidase how high is liver cancer
Does hepatitis turn into liver cancer
Liver ascites can infect
What is the seven items that second liver patient needs to check regularly
How to care for hepatitis B
How to confirm hepatitis B turns to liver cancer
Is intrahepatic metastasis of liver cancer very serious
What are liver function items
Liver cancer and high blood lipids together how to return a responsibility
b ultrasonographic liver can detect liver cancer
How does the tumor grow on the liver return a responsibility
Liver cancer tumor diameter 10 centimeters can live how much time
Can liver calcification be cancerous
Can liver color ultrasound detect liver cancer
How long will the liver region still swell after advanced liver cancer surgery last
What causes asthma in patients with liver cancer
Is small liver cancer misdiagnosed as hemangioma
Can primary liver cancer lead to high blood sugar
Can color Doppler ultrasound detect liver cancer
Is the harm of calcification in right lobe of liver big
Can hepatic steatosis induce liver cancer
Liver S8 segment liver cancer is serious
Is the hepatitis serious?
Will intrahepatic bile duct stones become liver cancer
Will liver cancer hematemesis die immediately
Can liver cancer eat longan
Can liver cancer patients eat an Gong Niuhuang pill
Liver function of physical examination today, some index is on the high side, can it be liver cancer
Can B liver five check out C liver
What harm does liver function have high
How does liver cancer care
Is the cure rate of second liver interferon high
Is liver function abnormal transaminase to return a responsibility with high
What is the cause of the small piece of low density shadow in the liver
Can a cold eat soft-shelled turtle
The danger of high transaminases
Got liver cancer can transfer
Will second liver certainly become liver cancer
Severe fatty liver harm
Can medium-term liver cancer do gamma knife
Can abnormal liver function infect
Can liver stones turn into liver cancer
Will liver cancer develop quickly
Can liver cancer not eat sweets
How does female mild fatty liver do
Is a low-density lesion in the liver a tumor
Can liver cancer patients be vaccinated against COVID-19
Can liver cancer eat Onions
How to check severe fatty liver
Why is hepatitis C more easy to transform into chronic hepatitis than hepatitis B
Is hepatic hemangioma serious
Liver cancer liver coma how to care
Can laboratory liver function detect liver cancer
How to care for liver tumor
Is the success rate of liver cancer interventional therapy high
How to care for liver malignant tumor
Can small liver cancer be intervened
3 cm liver nodule is liver cancer
What is the efficacy of cinobufagin tablets in the treatment of tumors
How to treat giant liver cancer with intrahepatic metastasis
Prevention and interventional treatment of primary liver cancer
Which liver cancer patients are suitable for interventional therapy
Advances in targeted therapy for liver cancer
How long is normal for fever after interventional therapy for liver cancer
How is the latest diagnosis and treatment plan of liver cancer
How to treat bone metastasis of liver cancer
What are the precautions of antiviral therapy in patients with hepatitis B
What is the advantage of liver cancer interventional therapy
How to treat primary hepatocellular carcinoma
What are the ways to fight liver cancer
Can traditional Chinese medicine cure intrahepatic cholangiocarcinoma
What are the advantages of traditional Chinese medicine in the treatment of liver cancer
Does chemotherapy be required after liver cancer surgery
What are the advantages of traditional Chinese medicine in treating liver cancer
Can the long tumor on the liver be treated minimally invasive
How to care for patients with liver cancer
What are the causes of liver cancer
What are the advantages of interventional therapy for liver cancer
Interventional treatment of liver cancer Can vascular interventional therapy cure liver cancer
Can liver cancer be treated conservatively
Can advanced liver cancer be treated well
What treatment method does liver cancer patient choose to compare good
Interventional therapy for advanced liver cancer is painful
To analyze the treatment policy of primary liver cancer
What do patients with liver cancer need to pay attention to
How long can you eat after liver cancer interventional therapy
Will liver cancer interventional therapy recur
Liver cancer patients can eat pig liver
How to treat postoperative recurrence of liver cancer
Can advanced liver cancer be treated with thermal ablation
What tests should be done after interventional therapy for liver cancer
Can liver cancer portal vein tumor thrombus be treated
How to diagnose and treat metastatic liver cancer
Which liver cancer patients can be treated with surgery
Hello doctor, can advanced liver cancer be cured
Liver cancer interventional therapy has what response
What should liver cancer patients pay attention to in life
Treatment of metastatic lymph nodes in liver cancer
How to distinguish between liver cancer and hepatic hemangioma
What tests to do for liver cancer
Does fatty liver need treatment
Which liver cancer patients are suitable for interventional therapy
How to care for liver cancer after interventional therapy
What are the advantages of TCM in the treatment of liver cancer
Is the interventional treatment of liver cancer painful
Does intrahepatic metastasis of liver cancer need chemotherapy
What are the benefits of treating liver cancer with TCM
Treatment of gallbladder tumors with liver metastases
How can liver cancer be treated just good
Can get liver cancer cure
Can early resection of liver cancer be cured
How can liver cancer be cured
Excuse me liver cancer, middle and advanced liver cancer, can you still treat Shu
Can abnormal liver function be cured
Is the white ball ratio 1:1 normal
How much liver cancer weight will be lost
Can advanced liver cancer be treated with ultrasound ablation
Can hepatitis be cured completely
Patients with liver cancer under what condition need interventional therapy
Can liver cancer spread well
Methods of interventional treatment of the liver
Liver cancer is not serious can cure
Is there conservative treatment for advanced liver cancer
Excuse me, the Chinese medicine that liver cancer metaphase treats method
Liver cancer interventional therapy needs to do how many times
How to choose the treatment of liver cancer
Which patients are suitable for interventional treatment of liver cancer
What is minimally invasive interventional therapy for metastatic liver cancer
Do patients with liver cancer still need treatment after surgery
Can gastric cancer metastasis to liver cancer be cured
There are several chemotherapy options for liver cancer
Can advanced liver cancer from pancreatic cancer be cured
How often do patients with liver cancer need to be reexamined after surgery
Can intrahepatic metastasis of liver cancer be surgically treated
What is the normal range of alanine aminotransferase
How much does interventional therapy of liver cancer cost once
Can liver cancer caused by cirrhosis be treated
How does liver cancer treat method choose
Can liver cancer be cured at the beginning
How to choose the treatment of liver cancer
How is liver cancer caused
Is surgery the first choice for liver cancer treatment
What are the indications for targeted therapy of liver cancer
How often should patients with liver cancer be reexamined
Is radiotherapy painful for liver cancer
Can liver cancer patients eat chicken
What is the success rate of interventional therapy for liver cancer
Is liver function of second liver big 3 Yang normal need to be treated
How does Liver cancer metastasize?
The role of collateral vessels in the embolization of hepatocellular carcinoma
How much is targeted therapy for liver cancer a month
Can liver cancer do intervention cure
Can advanced metastatic liver cancer be treated with target items
What treatment method should liver cancer adopt is good
Is hepatic tumor liver cancer need how to treat
Liver cancer and liver common duct cancer, can not be treated
Can traditional Chinese medicine cure cholangiocarcinoma
What tests should be done for patients with liver cancer
Can advanced liver cirrhosis be cured
Patients with early stage liver cancer are suitable for surgery or interventional therapy
Giant liver cancer, interventional therapy, take targeted drugs, what good Chinese medicine do you have excuse me
What are the hazards of liver cancer not treated in time
A 55-year-old female patient with liver cancer, can be cured
What are the treatment methods of liver cancer in traditional Chinese medicine
What needs to be paid attention to in the follow-up treatment of liver cancer
How should liver cancer be treated
The best treatment for early liver cancer
What are the precautions after interventional treatment of liver cancer
Can early liver cancer be cured in the elderly
What do liver cancer patients need to pay attention to
Is hepatoma Crenulata useful
Whether liver cancer can be completely cured
Causes of hemoptysis in advanced stage of liver cancer
How is liver cancer caused
Liver cancer patients with pain should pay attention to what
Liver cancer still needs to be treated with medication after surgery
Advances in immunotherapy for liver cancer
What are the indications for interventional therapy of liver cancer
What are the complications of interventional therapy for liver cancer
Can liver cancer patients eat American ginseng
Do interventional therapy can cure advanced liver cancer
Can diet therapy cure liver cancer patients
How to cure liver cancer completely
Liver cancer caused by hepatitis has infectivity
Liver cancer does intervene how much money needs
Interventional therapy is suitable for patients with liver cancer
What are the advantages of treating liver cancer
Can advanced liver cancer coma be treated
What are the types and methods of minimally invasive treatment for cancer
Good hospitals treat liver cancer
What are the causes of vomiting in patients with liver cancer
What are the advantages of interventional therapy for liver cancer
Liver cirrhosis advanced liver cancer early can cure
Is advanced liver cancer interventional therapy painful
Can liver cancer change liver, what symptom has early, whether treat
Can cholangiocarcinoma be cured
What are the reasonable treatment methods for metastatic liver cancer
Can liver cancer be treated with radiotherapy
How to treat liver calcification
Is interventional therapy useful for advanced liver cancer
What are the indications for interventional therapy of liver cancer
Can advanced malignant liver cancer be cured
What is the interventional therapy of liver cancer and need to be treated multiple times
Can excuse me liver cancer early cure
What should the diet pay attention to during the treatment of liver cancer
What situations are not suitable for interventional treatment of liver cancer
What are the commonly used embolic agents for interventional therapy of liver cancer
What are the discomfort after gamma knife treatment of liver cancer
What are the ways God cures liver cancer
Liver cancer can be treated by hepatic artery cannulation under what circumstances
Is targeted therapy useful for liver cancer
Can liver cancer do well after interventional therapy
What are the embolic agents of liver cancer interventional therapy
Liver cancer interventional operation how much money
How to reduce the recurrence of liver cancer after radical treatment
Can liver cancer be treated with thermal ablation
What liver cancer can be treated with gamma knife
What should liver cancer patients pay more attention to on their diet
Patients with liver cancer are not suitable for interventional therapy
Liver cancer interventional therapy needs how much money
How to care for liver cancer patients
Liver resection or liver transplantation is the first choice for the treatment of liver cancer
How much colon cancer screening costs
How are liver cancer patients who cannot be operated on treated
How long to discharge from hospital after interventional treatment of liver cancer
How to treat liver cancer after operation
Treatment liver slip operation which is good
Can liver cancer eat American ginseng
What is particle implantation in the treatment of liver cancer and hepatobiliary cancer
What method does advanced liver cancer have to treat not painful
How is liver area a little painful to treat
Is primary liver cancer interventional therapy effective
Is radiation therapy useful for liver cancer
Can advanced liver cancer be treated with interventional therapy
How does the liver cancer that cannot do operation treat
Are liver cancer patients suitable for targeted drug therapy
How should the liver area pain of advanced liver cancer be treated to have what method
Which liver cancer patients are suitable for microwave ablation treatment
Can all patients with liver cancer be treated surgically
What are the complications of ultrasound interventional therapy for liver cancer
Can advanced liver cancer be treated by operation
Can early operation of liver cancer be cured well can be treated with biological immune therapy
How fast is liver cancer wasting
Which liver cancer patients are suitable for gamma knife treatment
How long does it take for lung cancer to reach the liver
Liver cancer interventional treatment needs to pay attention to what
How is liver cancer treated by interventional therapy
Can diffuse liver cancer change liver
What should patients with liver cancer pay attention to
How long can liver cancer patients be discharged from hospital after interventional treatment
What are the advantages of traditional Chinese medicine in treating liver cancer
How do liver cancer patients choose treatment methods
Can microwave ablation be used to treat liver cancer
Can atypical liver cancer be cured
What are the ways to treat liver cancer
How much is the fever after interventional treatment of liver cancer
Can advanced liver cancer be cured
What are the contraindications of interventional therapy for liver cancer
What is the probability of living for 20 years with conservative treatment of liver cancer
Which liver cancer patients are suitable for gamma knife treatment
How to treat liver cancer quickly
Can alcohol liver be cured
Is advanced liver cancer interventional therapy good
What aspects should be paid attention to in daily life of patients with liver cancer
Can hepatocellular carcinoma be cured
Does hepatitis B cirrhosis need antiviral therapy
18 years of survival after interventional therapy for liver cancer
What tests are needed for liver cancer
Is liver interventional therapy painful
Is the liver function of big three Yang normal need to be treated
Can long tumor on liver be cured
What way can patients with advanced liver cancer be treated
Can early detection of liver cancer be treated
Can liver cancer be operated on
Can early liver cancer be cured
Four methods of interventional therapy for advanced liver cancer
How to treat mild liver cancer
How long to review after interventional treatment of liver cancer
What are the ways in which liver cancer enters the bone
Can advanced liver cancer be treated with current technology
What are the means of interventional therapy for liver cancer
What are the disadvantages of liver interventional therapy
Can ablative surgery cure liver cancer
What are the interventional treatment methods for liver tumors
What diseases can be treated by interventional therapy
What should liver cancer patients pay attention to
Can excuse me suffer from liver cancer to treat
How is the effect of biological treatment method of advanced liver cancer
Which cancers are eligible for PD1 therapy
How long to review after radiotherapy for liver cancer
What can you eat on liver cancer diet
Can liver cancer eat red beans
How to treat diarrhea after liver cancer ascites
Is early liver cancer terrible
Advanced liver cancer, ascites, finding a prescription
Can liver cancer patients eat Onions
Liver cirrhosis, liver ascites, primary liver cancer is possible
What does high fibronectin represent
Is liver cancer severe with ascites
Is liver ascites infectious as liver cancer
Can you eat sea cucumber recuperation after liver cancer surgery
Can liver cancer gecko eat
Can liver cancer ascites be smoked
Is bleeding in the stool cancer
Is the rupture of liver cancer advanced
Could hypoechoic areas of the liver be cancer
Got the person of second liver, can't really be treated well
How does liver cancer itch to return a responsibility
What fruit does liver cancer eat better
Can the patient of liver cancer advanced dry fruit kind eat
Peanut butter liver cancer can eat
Can liver cancer still be operated on
Is abnormal liver perfusion cancer
Diffuse advanced liver cancer with hepatic ascites
Can liver cancer drink medlar
Can early liver cancer be operated on
How long can you eat hot pot after liver cancer surgery
Can small liver cancer be treated with interventional therapy
How is the prognosis of liver cancer ascites
Can liver cancer eat peanut
What drug can liver cancer body hydrops use to drain
Can liver cancer metastasize lung cancer
Can hepatitis B be cured
Can liver cancer take target drug under what circumstance
Can lung metastasis of liver cancer be treated
Liver cancer, multiple abdominal lymph nodes, and ascites
What condition does intrahepatic cholangiocarcinoma later stage hematochezia
Can liver cancer eat tofu
Can liver cancer eat black rice
Can liver cancer patients eat ejiao after surgery
Can liver cancer eat gastrodia
Can liver cancer eat seafood
Liver cancer liver cirrhosis ascites infection
Hypoechoic or hyperechoic liver cancer
Can liver transplantation be done in advanced liver cancer
Is the liver cancer body itching worse
Liver cancer is cancer king can cure
Liver cancer liver ascites need to pump water
Lung cancer three itchy, liver cancer which three
Which tests can find liver cancer
Can early-stage liver cancer be operated on
Is ascites advanced cancer
How to deal with liver cancer ascites
Whether liver cancer ascites can use diuretic
Can liver cancer be treated with acupuncture
Can normal intestinal tumor markers rule out bowel cancer
Can liver cancer eat Huaishan
Can eat rhodiola prevent liver cancer and treat liver cancer
Can liver cancer patients eat pomegranate fruit
Liver cancer late can eat melon
Can liver cancer return to normal by itself
Will hepatitis die
Can get liver cancer cure itself
Can B liver have a fever
Liver cancer patient after operation, excuse me a few values are on the high side normal
Can the patient of liver cancer eat onion
Is the recurrence rate after primary liver cancer surgery high
Can liver cancer patients not eat rooster
Liver cancer can eat acid
Is the recurrence rate of liver cancer after operation high
Can liver cancer be jealous
Can fatty liver drink
Will liver cancer recur
How to return a responsibility is leucocyte decrease after liver cancer intervenes to treat
How is advanced liver cancer ascites pumped
Suffered from liver cancer, it is just checked out, can you do surgical treatment
Is liver cancer patient bubble water OK
Can liver cancer patients eat nuts
Liver cancer American ginseng can eat
Can liver cancer orange be eaten
Is liver ascites contagious
Can you eat pig liver after liver cancer surgery
Can liver cancer patients eat centipede
Can liver cancer patients eat ants
Can liver cancer test blood be checked out
What is diarrhea after liver cancer surgery to return a responsibility
Liver cancer cirrhosis ascites abdominal distension how to return a responsibility
Liver cancer ascites still can hold how long
Can liver cancer eat American ginseng
Does ovarian cancer turn liver
What food can liver cancer advanced liver ascites eat good
Can patients with diffuse liver cancer return to normal
Can bitter gourd treat liver cancer
Can liver ascites and liver cancer still be treated
Can liver cancer eat Ganoderma powder
Can liver cancer cold take medicine to eat
Alpha-fetoprotein test is H11029 for liver cancer
Is liver cancer liver ascites contagious
How does whole body itch return a responsibility
How does liver cancer add liver ascites in advanced stage do
Will primary liver cancer metastasize
Can severe fatty liver be cured
What to eat to kill liver cancer cells
How to care for complications after liver cancer surgery
Can liver transplantation be used in the early stage of intrahepatic cholangiocarcinoma
How long can you swim after liver cancer surgery
Can liver cancer eat fish what fish can eat good
Is liver cancer late liver ascites saved
Can primary liver cancer be treated nonoperatively
Can adenocarcinoma be cured
Can liver failure be cured
Will liver cancer recur after surgery
Can liver cancer eat honey
Can liver cancer patients eat Ganoderma
Is hiccup after liver cancer surgery late
Is rupture of liver cancer advanced
Is there ascites in the advanced stage of liver cancer
Primary liver cancer can live for several years
Is it good for cancer to eat sea cucumber
Whether liver cancer can be treated by interventional therapy after surgery
Can liver cancer eat mulberry yellow
Can late liver cancer use urine therapy
How to care for liver cancer ascites
Liver cancer can not be operated on such a situation can still live how long
How is liver cancer ascites abdominal pain treated
Whether colon cancer may metastasize into liver cancer
Do I need to take medicine after liver cancer surgery
Can nerve tumor be cured
Can liver cancer shine a light to cure cure
How to eliminate liver cancer ascites
Intrahepatic metastasis of liver cancer counts a few stages
Can liver cancer eat turmeric
Can advanced liver cancer be operated on
Can chronic liver cancer have a fever
What good can liver cancer late recombine season eat
Can ascites caused by liver cancer be pumped
Can liver cancer cause diarrhea
Does liver cancer appear bloody ascites
Small liver cancer can be treated without surgery can traditional Chinese medicine
Liver cancer advanced and have ascites what medicine should take to be able to treat
Spray door cancer postoperative recurrence, ascites, can traditional Chinese medicine treatment
Is advanced liver cancer liver ascites contagious
Can liver cancer saffron be eaten
Can liver cancer ejiao be eaten
How long can primary liver cancer recover after surgery
Can liver cancer and lung cancer be treated simultaneously
Can liver cancer be treated with a small amount of ascites
Can ascites in advanced liver cancer be eliminated
Can often drink coffee to prevent liver cancer
Can you drink milk after liver cancer surgery
Can liver cancer eat papaya
Can Virgo cure hepatitis B
Is the cancer vaccine real
Can abdominal ascites in advanced liver cancer be pumped
Will liver cancer have a fever
What thing can early liver cancer eat
Can liver cancer be cupped
Can liver cancer coffee be drunk
How long can be discharged after liver cancer interventional therapy
Can liver cancer eat tomatoes
How should liver cancer cause liver ascites to treat
Can liver cancer do biological immune therapy
Can liver cancer eat shrimp
Can B liver drink a small amount of beer
Can early liver cancer be treated only with drugs
Can liver cancer be transplanted
Can liver cancer be transplanted
Is it possible to cure liver cancer
What drug can liver cancer appear double lower limb edema take to detumescence
Can get liver cancer often angry
Can early detection of liver cancer really cure it
Can liver cancer blood test be detected
Is lung metastatic tumor cancer
Can liver cancer eat Coix rice
Can gastrointestinal bleeding be cancer
Can postoperative liver cancer patients regulate traditional Chinese medicine
Can liver fibrosis be cured
How long can 10cm liver cancer live
How long will liver cancer recur after surgery
Can liver cancer be inherited
Can liver cancer eat salty
Will the skin itch in the early symptoms of liver cancer
Can liver cancer relapse still be treated
Can liver cancer eat garlic
Can liver cancer eat raisins
Can be discharged after liver cancer intervenes to treat
What can advanced liver cancer spread eat
Can advanced liver cancer ascites be pumped
Can advanced liver cancer be sweat steamed
Right upper abdomen is stuffy, whether it may be liver cancer
Is Cancer Scary?
Can you drink after colon cancer surgery
What is cancer metastasis to the liver
Liver cancer patients can eat spirulina
Got liver ascites how to do, can cure
Did not pregnant HCG why rise
A plantar blood test was positive for CAH
What does terracotta stool indicate
How does stomach bloat dozen burp appetite bad do all the time
The carbohydrate antigen CA72-4 is high
Transaminases more than 200 must be hospitalized
How to choose between surgical operation and interventional treatment
My Ca153 is 9922 and the reference value is 0/35!
Newborn, failed cAH screening
Dull pain under the ribs in the right upper quadrant of the abdomen
At 36 weeks and 3 days of gestation, I would like to estimate the current weight of the fetus
What should be rechecked if ca19-9 and ca50 are high in the entry physical examination
Tumor marker carbohydrate antigen ca724 was examined for elevation, and gastrointestinal tests were done today
Will spider moles go away on their own
My 2 uncle's body is not good recently upper abdominal pain is good accompanied by evil
My carbohydrate antigen 72-4 test is 932,
How to do 36 weeks of pregnant diarrhea
How does damaged liver prevent deterioration
A dense little red spot on your wrist doesn't hurt, itch or stick out
Is glutamyltransferase 200 serious
Lymph nodes in the neck, stomach distention and numbness
AIDS life span
Is glutamyl transpeptidase 500U/L high serious
Is bone cancer the right word
A tumor in the adrenal gland and a recent pain in my back and stomach and vomiting
Carbohydrate antigen ca15-3 check how much
How to treat the pain in the ribs below the right chest
Is there a correlation between liver cancer urine and disease severity
Blood test showed high levels of CA153
How to distinguish haematemesis from hemoptysis
How to do to have induration on right neck sinew
Antinuclear antibody cutoff, ANCA cutoff, consult your doctor
Ask for a reply! The lover had an upset stomach a few days ago and had a bloody stool 10 days ago
Half A year after surgery and chemotherapy for stage IIIa lung adenocarcinoma, a small nodule was found on the other side
CA-153 breast cancer antigen was found to be relatively high (1793)
Taking Qingresanjie tablets, I was worried about the toxicity of Qianli light
At the age of 59, the examination result said that CA was more likely
Does grandma's mother inherit liver cancer
The carbohydrate antigen CA-125 was high
Report of tumor cell detection in peripheral blood
With elevated CA19-9, should we be alert to pancreatic cancer
The perinuclear pattern of antineutrophil cytoplasmic antibody was positive
Please see the test results for me. Thank you
What is the reason for the urine pregnancy test
What further tests should be done for high CA724 index
6. Is there a tumor on the liver on my father's CT
What department does the examination glutamyl transpeptidase hang
I had a kidney biopsy, and now the doctor has asked me to test for antinuclear antibodies, ANCA
Excuse me, does this result need to be operated on? Is it unmarried or childless
Gastrointestinal problems, suspected gastric bleeding, CA742 elevated to 2219
The carbohydrate antigen test showed an elevated CA153 of 2714
Can small three Yang turn negative
20 years old sometimes appear abdominal pain
Can hepatitis C be transmitted through saliva
White blood cells 225×10? Is /L dangerous
The carbohydrate antigen CA-125 was high in three breast cancer tests
Late liver cancer associated with resistance to spread to the lungs pelvis Ju duct calculi
Blood tumor markers ca153 worth 286 slightly tall it doesn't matter
Do you need an empty stomach for chylglycine
Is bladder squamous cell carcinoma contagious
How long should we take entecavir dispersible tablets in large three Yang anti-virus
What on Hcc medicine
Why PET-CT for suspected liver cancer metastasis
Where does spider nevus generally grow
What is the upper abdominal CT scan
The ca72-4 value was 15684, and he had no discomfort symptoms
The CAP value 306E value 44
Dad's ca724 is high. Is this serious
Check CA19-9 hang what department
Depression accompanied by schizophrenia
How is hepatitis C screened
What sites are examined by MRI
May I ask what this blood test result is called elevated CA72-4
The simplest method for small three Yang to turn negative
I did hepatitis B test to let the doctor give me to see
How does PETCT differentiate between benign and malignant tumors or lesions
Can Grandma's liver cancer be inherited from Mom
Cause of dull pain in the right upper abdomen
Duodenal ca metastatic pulmonary ca, copd
Well-differentiated squamous cell Ca,
Can Grandpa's liver cancer be passed on to his grandson
A physical examination found a high level of CA724
Is cirrhosis 53 enough to live to 80
Irregular menstruation, pale white discharge from both breasts after the period
Three indicators of C1A screening were high, especially CA71-4
What can chest spiral CT detect
Is transaminase 100 or so serious
The tongue base is bitter in the morning, the tongue is bitter when you get up, and alanine aminotransferase is higher than normal value
The left leg has been like this for 20 days without too much pain
567 for carcinoembryonic antigen and high for carbohydrate antigen ca72-4
ca72494, is there any serious condition
Endoscopic diagnosis: rectal ca, pathology has not come out, is this serious
Liver cancer 45CM*4CM*45CM is early or middle stage
Elderly patients with advanced Ca had emaciation and anemia for 6 months and hallucinations for 15 days
A month of sudden weight loss 20 kg carbohydrate antigen is high
Family old man 65 years old liver cancer spread to the bile duct
Is alanine aminotransferase 65 high
What about CA724 elevated to 97
Rock bath glycosidase 64. What's going on
I feel a foreign body in my throat. Accompanied by a cough,
Other people's spit spit to my wound can infect what disease
32 weeks pregnant, hit a hard object on my right hipbone above
When is a quantitative HCV RNA test positive
A: I recently had an upset stomach and then began to have blood in my stool 10 days ago
Metastatic liver cancer. Knowing that there is no hope for cure, I hope for a prescription to relieve the pain. Thank you
Is MRI accurate in detecting tumors
Anca-associated vasculitis
Two years earlier, he had undergone radical hysterectomy
How should small three Yang test sheet see
ANCA vasculitis nephritis can play new coronavirus vaccine
What is the normal reference value of alpha-fetoprotein
What is serum alpha-fetoprotein
What is the normal range for alpha-fetoprotein
How much is high is alpha-fetoprotein
How much alpha-fetoprotein is liver cancer
What is the normal range for alpha-fetoprotein
What is the reference value for alpha-fetoprotein
What disease is alpha-fetoprotein on the high side
How much high alpha-fetoprotein is liver cancer
Alpha-fetoprotein is on the high side
What is the reference value of alpha-fetoprotein in liver cancer
Alpha-fetoprotein is high.
High alpha-fetoprotein is liver cancer
Is alpha-fetoprotein 18 liver cancer
What is the reference value for high AFP
Normal values for alpha-fetoprotein
What is alpha-fetoprotein positive
What to do with high alpha-fetoprotein
The normal range for alpha-fetoprotein
What is the normal value of AFP in liver cancer
Alpha-fetoprotein index is more or less normal
Liver cancer A mussel protein is how much
The alpha fetoprotein of liver cancer is generally how much
What is hepatitis B alpha fetoprotein
Have liver cancer patient at home excuse me next doctor this check result what meaning
Can the initial stage of liver cancer be examined by color Doppler ultrasound
Can repeatedly boiling water cause cancer
Can the new coronavirus vaccine be hit after liver cancer surgery
What is it that liver cancer is detected without symptoms at ordinary times
Liver cirrhosis liver cancer at the same time emphysema serious
How to keep liver cancer away from you
Why do young people get liver cancer
Does alcohol make liver cancer worse
Can SBRT be performed for liver cancer
Liver cancer advanced leg does not have strength how to do
How does a month after liver cancer operation do all the time abdominal distension
My grandpa anterior segment check is liver cancer, yesterday went to the toilet to pull a lot of excuse me how to return a responsibility
Can you eat Huaier after liver cancer interventional operation
Can liver cancer jaundice emphysema be operated on
Got liver cancer how should deal with
Can liver cancer have emphysema to operate under general anesthesia
Can autoimmune hepatitis be repeated
A new lesion was found in his father after resection of small hepatocellular carcinoma
Is the given diagnosis determined as advanced liver cancer and how should it be treated
Patients with advanced liver cancer have persistent fever and poor appetite
Metastatic stage of liver cancer. It's also found in the lungs.
Can Dad liver cancer be inherited
Invigorating spleen and dispelling phlegm against liver cancer
Will man's liver cancer be inherited to the next generation
Female right leg knee pain is liver cancer
Can long-term loose bowels cause cancer
How to supplement nutrition in advanced liver cancer
How should the elderly with liver cancer treat a cold
What physical conditions are required for early resection of liver cancer
Can soluble dietary fiber induce cancer
Liver cancer was reexamined two and a half months after radiofrequency ablation
Can liver cancer be seen by B-ultrasound
Only do ct look is liver cancer, must be liver cancer
Is the rupture of liver cancer serious
Will liver cancer shine again before it dies
b ultrasound how to show early liver cancer
The examination results of liver cancer one and a half years after operation to help see whether there is deterioration.
My father has had liver cancer for six years, and now it is cancerous and has spread to the whole body.
Report of reexamination 4 months after liver cancer operation
Have the doctor that can see liver cancer help me to solve confusion
Uncle has liver cancer metastasis, but also suitable for liver transplantation
My husband got advanced liver cancer, how should I do
2. What is the price of replacing norfovir
Can liver cancer surgery cause ascites after a month
When can the COVID-19 vaccine be given after liver cancer surgery
It has been half a year since the liver cancer intervention. He has had a fever in the liver
How should liver cancer adjust after radiotherapy to fill to do
The reexamination results of my father's liver cancer after operation.
Can liver cancer be passed on to the next generation
After liver cancer surgery, the nose is red for nearly two months, which is the reason
Can b ultrasound be done for advanced liver cancer
What are the CT/MRI findings of small hepatocellular carcinoma and DN nodules in the early stage of canceration
The components of this diet tea drink too much will get liver cancer
How should liver cancer recur deal with
Can CyberKnife treat liver cancer that has metastasised
Are sunflower seeds a carcinogen
Friend father liver cancer existing ascites can cure good
Ascites and pleural effusion occurred after interventional surgery for advanced hepatocellular carcinoma
The optimal timing of operation for liver cancer
You can get liver cancer from smoking, drinking too much, drinking contaminated water
Can liver cancer color ultrasound see it
One and a half years after surgery for early-stage liver cancer
Intrahepatic cholangiocarcinoma appears jaundice is advanced
Early liver cancer has been resected need to do intervention and take rake to drug
Esophageal cancer metastatic liver cancer vomit how to return a responsibility to speak inclearly
Can liver cancer not eat to go to meal to be improved after interventional therapy
Is Apatinib effective for liver cancer
A dull pain in the right upper quadrant is liver cancer
Liver cancer, portal hypertension, bilateral vascular cancer emboli
Imaging features of primary liver cancer
The patient could be discharged after a few days of radiofrequency ablation
What preparation is required for liver cancer surgery
Will pleural effusion appear in liver cancer
Early liver cancer, can from some small changes in the body
Can early liver cancer be cured by high radiofrequency therapy
Is the precursor of cancer frequent cold
Does liver cancer affect sleep
Does selenium deficiency cause liver cancer
Do overnight dishes really cause cancer
How to deal with recurrence of liver cancer after surgery
B liver carries the influence to the body big
Got C liver can cause liver cancer
Went to the hospital to do the examination, the current result is possible liver cancer
Postoperative liver cancer, lung metastasis, bone destruction of the coccyx
Can liver cancer be detected by color Doppler ultrasound
10 days after liver cancer ablation surgery, the fever has been low for 18 days
After making ct enhancement, are liver cancer and hepatic cyst both easy to judge
Can husband liver cancer cocoon infect
This kind of diet tea drink much can get liver cancer
Went to do CT yesterday, the result shows liver cancer, still have treatment
I have advanced liver cancer, what to do
Liver cancer advanced liver ascites blurred vision return urine yellow how to do
Is there no recurrence of liver cancer after operation for 5 years to mean nothing
Advanced lung cancer turned liver on, do camel snail knife good
Can alcohol liver heal itself without drinking
A year and two months after liver cancer transplant
Can liver cancer be transmitted directly to family members
Can you get cancer if your immunity is low
Do advanced liver cancer do interventional therapy more times can more aggravate the condition
How to deal with ascites after liver cancer resection and recuperation at home
The fourth chemotherapy has ended for a while, and now I have some dizziness during the liver protection treatment
After liver cancer surgery, I am taking targeted drug sorafenib, and I have eczema on both sides of the anus
A friend of mine says he has liver cancer, doctor
These conditions are a precursor to cancer
Liver cancer in the advanced stage of abdominal water serious
Can early liver cancer be detected by B ultrasound
Because grandma is liver cancer died, want to check below B liver 5
From the beginning of long tumor how long will turn into liver cancer
I did liver cancer operation more than a year what to eat to compare health care
The old father liver cancer late jaundice, low appetite, itchy skin, yellow urine
Can advanced liver cancer ascites lead to death
Will a liver cancer vaccine be available by 2020
Recently lumbago to check, accidentally found a liver cancer cyst, do not know good treatment
Liver cancer has three months after surgery, look at the face yellow
Color ultrasonographic picture is as follows is the probability of liver cancer big excuse me
Can father-in-law liver cancer infect children
Does liver cancer need surgery early
Can obesity cause liver cancer
Can diffuse liver cancer in the right lobe of the liver be contagious
Do patients with liver cancer also have mental problems
Can a father who dies of liver cancer be passed on to his children
What is the reason for the well-defined hypoechoic nodules
Please ask the doctor to help see if this is liver cancer
Why does not smoking also cause liver cancer
What clinical manifestations will appear in the early stage of liver cancer
Can liver cancer cause pus in the abdominal cavity
B ultrasound can detect early liver cancer '
Does liver cancer pumping require hospitalization
Liver cancer has been operated on in the middle stage.
Can liver cancer cause pleural effusion
Small three Yang can transform liver cancer
Can liver cancer intubation drainage tube be pulled out
Jaundice, sometimes pain in the liver area, for several years
Surgical effect of microwave ablation of liver cancer
Whether parents with liver cancer will be inherited to their offspring
Liver cancer for a year has been resistant to specific drugs
Stomach and waist had been painful, considered gastric cancer
Is there a risk in the treatment of liver cancer with iodine-125 particles
Will liver cancer embolization be done in one session
What is the reason for no recurrence of liver cancer three years after operation but general discomfort
How to do if liver cancer is found after gamma knife surgery
Patients do liver cancer interventional surgery, come back home for a week, feeling not strong
Is loach helpful for liver cancer
Does diabetes also cause liver cancer
How long to stay in bed after open abdominal surgery
Can b ultrasound detect early liver cancer
Can liver cancer emphysema reduce fat
Massive liver cancer in right lobe of liver and multiple sub-foci in liver
Advanced stage of liver cancer, has spread, now Beijing 382
Why is the pain more and more serious in the late stage of liver cancer
Vaccinate B liver vaccine to produce antibody certainly
Is fatty liver infiltrative disease serious
Is all the chest pain breast hyperplasia
B HCC embryonic antigen and carbohydrate antigen 199
Does liver cancer cause tongue curvature
Liver cancer is inherited in sons or daughters
Can liver cancer be transmitted to others
Father-in-law liver cancer can infect the baby
Liver cancer, half a year after intervention, today did MRI excuse me
Where is the liver cancer right shoulder pain specific location
Liver cancer is advanced now to loose stomach how to do afternoon fever
Can you eat Amli Nutri lai product after liver cancer surgery
After the liver cancer interventional surgery (more than 20 days), the patient always felt uncomfortable in the stomach
What tests should be done for early diagnosis of liver cancer
Liver cancer cerebral hemorrhage coma 10 days how to do
Three days before the death of advanced liver cancer symptoms
How does right liver place ache faintly return a responsibility
Can get alcohol liver certainly become liver cancer
Three years after breast cancer surgery, he was suspected of liver cancer
Can liver cancer be found in time when examined by color Doppler ultrasound
Is liver cancer diagnosed at the time of examination
Can take entecavir get liver cancer
What is the occasional stabbing pain in the liver area for a second or two to return a responsibility
Do you feel weak in the late stage of liver cancer
When is the second time after the first liver cancer intervention
A nodule was found one month after resection of the small liver cancer
Why does the body temperature drop in the advanced stage of liver cancer
Liver cancer to do intervention generally do a few times
How to find out that liver cancer has spread
How to tell if you have liver cancer
Is the effect of liver cancer combined with portal vein tumor thrombus good
My father is liver cancer, how to regulate the body deficiency after three interventions
Advanced liver cancer is now liver coma can be maintained for a few days
Liver cancer abdominal distension rapid exhaust method
How is liver cancer graded according to pathology
The time for newborn to be vaccinated against hepatitis B
What does the doctor trouble help me to see this examination item mean is liver cancer
Why are early signs of liver cancer overlooked
Is it true that eating sunflower seeds causes cancer
How often should you get a checkup to prevent liver cancer
Can smoking and drinking get liver cancer
Get alcohol liver to eat moldy food
Liver cancer ascites stomach more and more big still can hold how long
My dad liver cancer in the middle of the operation, will it recrudescence
Why can appear the part of liver uncomfortable
Hello doctor, my husband's father died of liver cancer
Can liver cancer cause headache and dizziness
How long does liver cancer embolization surgery take
How to maintain a good attitude in the face of liver cancer
Can you eat bird's nest with ganoderma lucidum and propolis every day after liver cancer surgery
Liver cancer rupture is easy to transfer what position
Why should check liver cancer take chest X-ray
Will liver cancer certainly lose appetite
Will early liver cancer recur after surgical resection
Contrast-enhanced ultrasound features of liver cancer
Jaundice hepatitis into liver cancer will not be infectious
Is the jaundice caused by liver cancer contagious
How to do vomit after liver cancer intervenes surgery
Liver cancer targeted drug sorafenib how much is a box
Want to know about liver cancer can be inherited
Can drinking cause this liver cancer
Is liver cancer inherited? Will liver cancer be passed on to children
Liver cancer do b ultrasound can see out
Can liver cancer eat black fungus and mushroom
Can second liver affect life span
Is the blame that the abdominal pain of unknown reason diarrhea all food provoks
6. My father was diagnosed with early-stage liver cancer
How does cancer cells of lung cancer of advanced stage spread to liver do
Does mother liver cancer inherit the next generation
Can you drink Yuan fish soup after liver cancer pumping ascites
Can aflatoxin cause cancer
Analyze the pathology report of liver cancer surgery!
Will FNH heal by itself
Is there a relationship between the usual eating habits and liver cancer
Liver cancer do gamma knife cancer cells can spread
Friend liver cancer surgery for one year, male, 40
What is the tumor operation of liver resected according to
Stomach bloating belching appetite is bad, sometimes good and sometimes bad, how to return a responsibility
Liver cancer b ultrasound can see out
Excuse me doctor, drank wine sometimes liver area feel ache, eye is dry, can be
Does sorafenib have effect to liver cancer excuse me
Can grandpa liver cancer be inherited
My aunt got liver cancer now, very painful at present, how should do
Will the family history of liver cancer inherit the next generation
Annual physical examination will find early liver cirrhosis
Knee pain one year after liver cancer surgery
What about sorafenib-related diarrhea after liver transplantation for liver cancer
Could you tell me more about the types and symptoms of liver cancer
Can liver damage caused by long-term medication lead to liver cancer
b ultrasound can detect early liver cancer
What are the high-risk groups of liver cancer ascites
What are the types of commonly used tumor markers
What are the symptoms of hepatic lipoma
What tumor markers are found in liver cancer
What tests are available for metastatic liver cancer
What targeted drugs are available for liver cancer
The difference between large and small liver cancer
What are the side effects of radiotherapy for liver cancer
What are the antibodies after liver cancer surgery
How to divide liver hemangioma and liver cancer
What are the indicators of liver cancer
What are the differences between liver hemangioma and liver cancer
C liver common sense has what
What are the manifestations of hepatic encephalopathy
What is the classification of liver cancer
B liver A liver C liver which serious
What are the types of liver cancer
What are the screening methods for liver cancer
What are the chemotherapy methods for liver cancer
What precautions should be taken in daily life of patients with liver cancer
What are the screening methods for colorectal cancer
What are the surgical methods for liver cancer
What are the conservative treatment methods for liver cancer in cirrhosis
Hazards of advanced liver cancer
What is the diagnosis of liver cancer
What are the high-risk groups of liver cancer
Who needs radiotherapy for liver cancer
What are the symptoms of metastatic liver cancer
What are the hazards of hepatitis C
What is the bad treatment method of liver detox
What is the difference between liver cancer and liver cyst
What are the hazards of advanced liver cancer
What are the causes of cancer
The survival rate of liver cancer surgery
Pain characteristics in the early stage of liver cancer
What are the surgical methods for liver cancer
What are the diet treatments for cancer
What are the risk factors of liver cancer
What are the treatment methods of liver cancer in each period
What are the dietary principles for patients with liver cancer
What are the hazards of hepatitis
Liver tumor minimally invasive treatment methods have what
What are the high-risk factors of liver cancer
What are the pathological types of primary liver cancer
What is the food that treats liver cancer
How is liver cancer graded
What are the symptoms of liver cancer metastasis
What are the manifestations of liver cancer
What are the signs of liver cancer
What are the Chinese herbs that relieve pain and fight cancer
What are the methods of anti-tumor
What are the methods of local ablation treatment for liver cancer
Differences between hepatic hemangioma and hepatocellular carcinoma
Who is at high risk for liver cancer
What are the categories of liver cancer
Do gradually elevated liver and gallbladder proteins cause liver cancer
What are the conservative treatments for liver cancer
What are the manifestations of hepatomegaly
What are the types of primary liver cancer
What are the targeted drugs for liver cancer
What are the high-risk groups of liver cancer
What are the causes of liver cancer
What are the types of tumors
What are the surgical treatments for primary liver cancer
What is the harm of hepatitis B virus infection
What are the hazards of regular drinking
Liver tests report alpha-fetoprotein 1475
What causes liver cancer
What are the precautions for patients with liver cancer
What are the symptoms of liver cancer after interventional therapy
Suitable for liver cancer patients with medicinal diet has what
What are the causes of fever in patients with liver cancer
What is the diagnosis of liver cancer
A hepatitis B hepatitis C which serious
Which liver cancer patients are suitable for surgical treatment
Which is serious, hepatitis or liver cancer
What are the recommendations of traditional Chinese medicine for liver cancer
What are the high-risk groups of liver cancer
Hepatitis B cirrhosis develops to liver cancer
Treatment options for liver cancer
What are the ways to pick up and measure liver cancer
What is the basic common sense of liver cancer
What is the difference between hepatitis B and hepatitis
Liver cancer pain to eat which traditional Chinese medicine can relieve pain
What are the characteristics of primary liver cancer pain
What are the high risk factors of liver cancer
What are the high-risk groups of liver cancer
What is the diet of liver cancer patient
What are the early diagnostic methods of liver cancer
What are the methods of diagnosing liver cancer
What are the symptoms of liver cancer, what needs to be noted
What are the pathological types of liver cancer
The difference between liver cirrhosis and liver cancer
What are the side effects of chemotherapy for liver cancer
What are the characteristics of liver cancer tongue coating
What are the dietetic methods of anemia
The difference between metastatic liver cancer and primary liver cancer
What does hepatic interventional therapy mean
What are the causes of liver cancer
What are the high risk factors of primary liver cancer
What are the misunderstandings in the treatment of primary liver cancer
What are the causes of postoperative recurrence of liver cancer
Differential diagnosis between hepatic hemangioma and hepatocellular carcinoma
What are hepatobiliary and pancreatic tumors
Differential diagnosis between hepatic hemangioma and hepatic carcinoma
What are the staging and diagnostic methods of liver cancer
What are the causes of high gamma globulin
What foods should be eaten more to prevent liver cancer
What are the factors that induce liver cancer
What are the symptoms of liver cancer, what needs to be noted
What are the ways of metastatic cancer of liver cancer
What are the examination methods of liver cirrhosis
What are the ways of radiotherapy for liver cancer
What are the high-risk groups of liver cancer
What are the principles of dietary treatment for liver cancer
Liver cancer to do what examination
What are the TCM classification of liver cancer
What is the difference between liver cancer and hilar carcinoma
The difference between hepatic hemangioma and liver cancer
What is the food that hurts liver
What does liver cancer eat commonly have
What is the drug treatment of hepatitis C
What are the side effects of liver cancer chemotherapy
What are the common drugs for liver cancer (Part 2)
What are the pathological types of liver sarcoma
What are the complications of liver cancer
What are the common postoperative complications of liver cancer
What are the types of liver cancer
How is liver cancer caused
What are the manifestations of liver palm
What are the sequelae after liver cancer surgery
Does liver cancer die quickly
What are the ways of treating liver cancer in China
What are the new drugs for the treatment of hepatocellular carcinoma
What are the early signs of liver cancer
What are the symptoms of liver cancer
What is the classification of liver cancer in traditional Chinese medicine
What are the risk factors of liver cancer
What are the causes of liver cancer
What are the causes of fever
Which liver cancers need radiation therapy
What are the hazards of fatty liver
The way liver cancer metastasises
What are the symptoms and manifestations of liver cancer
What are the targeted drugs for liver cancer
What are the types of primary liver cancer
Who is susceptible to liver cancer
What are the causes of liver cancer
What are the causes of liver cancer
Who is more likely to develop liver cancer
What are the common misunderstandings in the treatment of liver cancer
How liver cancer spreads
What are the hazards of high white blood cells
The recipe that suits liver cancer patient to eat has what
Types of targeted drugs for liver cancer
What are the hazards of hepatitis B drinking
What is the difference between large liver cancer and small liver cancer
Liver cancer surgery is about how much
What is the classification of primary liver cancer
What are the types of liver cancer at present
What are the manifestations of liver cancer patients
What are the side effects of interventional therapy for liver cancer
Differential diagnosis of Liver cancer
Foods you can't eat for liver cancer
What is the method of protecting liver to prevent tumor
What are the new technologies for liver cancer treatment
What are the hazards of chronic hepatitis B
What is the difference between hepatitis and liver cancer
What are the specific drugs for esophageal cancer
What is the killer of liver cancer
What are the biological targeted drugs for liver cancer
What good method does protein decrease have after liver cancer surgery
Differential diagnosis of liver cancer and hepatic hemangioma
What are the poorly differentiated ways of liver cancer
What are the causes of recurrence of liver cancer
What are the local ablation treatment methods for liver cancer
What are the differences between liver tumors and liver cancer
What are the ways of physical examination to prevent liver cancer
What are the diet therapies for liver cancer
What are the side effects of radiotherapy for liver cancer
What are the precautions of patients with chronic hepatitis
What are the drugs of interventional therapy for liver cancer
What are the symptoms of intrahepatic cholangiocarcinoma
Which liver cancer patients need chemotherapy
What to look out for in liver cancer
What are the pathological types of liver cancer
What is the high-risk population of metastatic liver cancer
Life precautions of liver cancer
What are complications of liver cancer
What are the high-risk groups of liver cancer
What are the surgical risks of liver cancer
What are the characteristics of microwave ablation in the treatment of liver cancer
What are the effective treatment methods for liver cancer
What is the operation method of liver cancer
What are the precautions of liver cancer
Which cancers are useful for hyperthermia
What are the causes of liver cancer vomiting
What should pay attention to liver cancer
Prognosis of liver cancer after interventional surgery
What foods should patients with liver cancer eat more
What are the treatment methods after liver cancer is diagnosed
Differences between hepatitis and liver cancer
What are the key points of treatment for post-hepatitis cirrhosis
What is the difference between liver cirrhosis and liver cancer
What are the causes of advanced foot swelling of liver cancer
What are the effective means of treatment for liver cancer
What are the liver cancer departments
Is liver cancer radiation useful
What are the predisposing factors of liver cancer
What are the nursing problems of liver cancer
Where does liver cancer hurt?
What are the high-risk groups of small liver cancer
What are the treatment misunderstandings of liver cancer
What are the common drugs for liver cancer (Part 1)
Splenomegaly, hemoglobin 177, normal liver function
What are the differences between hepatic adenocarcinoma and liver cancer
What are the causes of liver cancer
What are the foods to prevent liver cancer
The difference between liver cancer and cirrhosis
What are the routes of liver cancer metastasis
What is the control method of pain in advanced liver cancer
What are the reactions after interventional treatment of liver cancer
What are the sources of liver cancer
What are the preventive examinations for liver cancer
What is the difference between hepatic hemangioma and liver cancer
Got liver cancer to have what good food therapy method
Oxaliplatin chemotherapy what cancer
How does intrahepatic cholangiocarcinoma produce lymphatic metastasis treat
How is big three Yang transformed into small liver cancer to treat
What does liver cancer patient reexamine need to check
How does the man's chest big treat
What are the cancer susceptible groups
How to treat metastasis after liver cancer surgery
Why does advanced liver cancer defecate impassable how should treat
How does advanced liver cancer relapse need to be treated
How does the patient with advanced liver cancer vomit all the time
How is bilirubin metabolism abnormal treated
The mother had liver cancer, and the physical examination found a tumor
How does traditional Chinese medicine treat hepatitis C
Liver cancer metastatic adrenal gland and how to treat blood vessels
How to treat liver cancer if there is giant tumor on the liver
How to treat cancer patients effectively
How to treat advanced liver cancer and spread
How should late rupture of liver cancer be treated
How does liver cancer cell spread treat
The cost of treating liver cancer in large hospitals
How is lymphatic tuberculosis and liver cancer treated
How to treat vascular atherosclerosis performance
Cinobufagin to what cancer treatment effect is good
Lung metastasis of advanced liver cancer ascites! How should treat method is good
Digestive tract early cancer screening check what
How to do with advanced primary liver cancer and metastasis
Can eating loach treat advanced liver cancer
How should excuse me liver cancer advanced patient treat
How is the therapeutic effect of tumor ablation
Is microwave ablation of tumors good
Tumor MDT treatment
What tests should be done for liver cancer
Excuse me liver cancer late can cure right head so
How should the patient of advanced liver cancer not open a knife to treat
Got liver cancer how should go to treat
The most serious complications of liver cancer
How to do liver tests
How to cure pubic lice
How does liver cancer late need to be treated to need to notice what
Liver cancer screening to do what examination
Can liver cancer eat mushrooms
How should advanced liver cancer be treated and saved
How is the person of liver cancer late painful ground called all the time to treat
How should advanced liver cancer be treated excuse me
Eat entecavir how to get liver cancer treatment
How much is the dose of butyl poison beans to treat liver cancer
How about the effect of hepatic arterial chemoembolization in the treatment of liver cancer
Is cancer of type o blood easy to cure
How to review patients with brain metastases after treatment
What should be checked in liver cirrhosis reexamination
How is liver disease treated by correct diet
Liver cancer interventional therapy how to do what is TACE
Liver cancer leg acid how to eliminate
How to check to have liver cancer
How should liver cancer bone metastasis be treated
What can liver cancer do to check out
Patients with advanced liver cancer have a fever of 40 degrees how to do
Will it recur after liver transplantation
What does liver cancer reexamination need to check
How is child infected B liver virus unfortunately treated
Check for cancer to do what examination
What is the right test for liver cancer
What examination is needed for liver cancer
What is the difference between vascular interventional therapy and systemic chemotherapy for liver cancer
Can liver cancer be treated with Shenghong therapeutic apparatus
How does liver cancer have jaundice again to treat
How is small three Yang treated
How does the diffuse liver cancer need to be treated excuse me
Got liver cancer how should I treat
Liver cancer portal vein cancer embolus, can traditional Chinese medicine treat
How to treat liver cancer combined with portal vein tumor thrombus
What does blood infection mean
How does suspicion get liver cancer to treat
How is nodule treated best
What is intensity-modulated radiation therapy
How is the diagnosis of liver metastases different from the treatment of primary liver cancer
How to treat liver cancer in the late stage of abdominal enlargement and hardening
How is advanced liver cancer metastasize to lung cancer treated
How to correctly understand the standard of liver transplantation for liver cancer
How does liver cancer need to be treated
How does toad skin cooperate Chinese herbal medicine eat ability treat liver cancer
How should tumour check
What is the difference between the treatment of Chinese and western medicine for liver cancer
How does liver cancer minimally invasive surgery do
What does liver cancer chemoradiotherapy need to pay attention to
Why is liver cancer called the king of cancer
How should massive type liver cancer late be treated
How should liver cancer method be able to treat just good
What is serum total bilirubin
How should liver cancer be able to cure completely
Second liver big small when is 3 Yang treated
How does lung cancer liver cancer metastasize to bone metastasize late
How should nasopharyngeal carcinoma liver metastasis be treated
How to treat early liver cancer excuse me
What cancer is targeted therapy most effective
What is portal vein embolization for liver cancer
What should patients with advanced liver cancer pay attention to when they eat Dolomite
What is the effect of antiviral therapy on liver tumor formation and recurrence of liver cancer
What about liver cancer patients who cannot tolerate chemotherapy
How to treat liver cancer advanced pancreatic lymphoma
How should liver cancer do to ability cure
Liver cancer, how to treat already painful at present
How is jaundice treated
How does advanced liver cancer have diabetes again for many years
I want to excuse me, how should liver cancer be treated
Is advanced liver cancer necessary to have chemotherapy
Liver cancer patients appear pain how to do
How does radiofrequency ablation treat liver tumors
How to treat advanced liver cancer combined with hernia
Excuse me, is this diffuse liver cancer how to treat advanced stage
What stage does 6cm liver cancer belong to
How does liver cancer have jaundice again to treat
How should be treated after advanced cancer cell spread of liver cancer
Does the old man have liver cancer meet heredity
What drug should liver cancer medium-term interventional therapy take twice
Can liver cancer chemotherapy fall hair
What preparation should be done before liver cancer interventional therapy
How to treat hematemesis
How to treat chemotherapy
? How to treat small nodules on the liver
What good curative effect does advanced liver of lung cancer, bone metastasis have
How to get liver cancer to treat excuse me
How does liver cancer metastasize to lung treat
How should advanced liver cancer be treated
How is alcoholic fatty liver checked
How much is a liver transplant
Is targeted therapy still useful for lung cancer metastatic liver cancer
How to maintain the patients with early liver cancer
Does radiofrequency ablation have sequelae in the treatment of liver cancer
What examination can do to diagnose is cancer
Liver cancer chemotherapy (early) how to treat
How can ability check gives liver cancer
How should liver cancer metastasize to lung to treat
How is liver malignant tumor minimally invasive treatment
How does liver cancer have jaundice again to treat
Must metastatic liver cancer be treated surgically
How does liver cancer form
How is hemochromatosis checked
How is bilirubin on the high side treated
What cancer can infect a person
Got liver cancer how should treat
How is metastatic adrenal gland of liver cancer advanced treated
How does advanced esophageal cancer metastasize into liver cancer infect treat
What does the patient with liver cancer need to notice excuse me
How is jaundice high treated
Can liver cancer bone metastasis still be treated
How to judge the treatment of primary liver cancer and metastatic liver cancer is different
How to treat hepatocellular carcinoma with portal vein tumor thrombus
How does stomach ache after liver cancer radiotherapy want to treat
How does want to vomit after meal treat
What does smoking have to do with liver cancer
Who is easy to get liver cancer
How does liver cancer late symptom puncture treat
What is tumor perfusion chemotherapy and embolization therapy
How is portal vein tumor thrombus formed and treated in primary liver cancer
How to treat lung metastasis of liver cancer
What are the advantages of radiofrequency ablation in the treatment of liver cancer
How should liver cancer combined with portal hypertension be treated
Complications of microwave ablation in the treatment of liver cancer
What can liver cancer patients eat to supplement the spirit
How should advanced diffuse liver cancer be treated
How to treat liver cancer with portal vein tumor thrombus for 5 years
Why does liver cancer need comprehensive treatment
How does father get liver cancer to treat
How is uric acid low treated
How does liver cancer bone ache
How does liver surface rough treat
How does liver cancer patient abdomen and leg swelling do
How to early detection of liver cancer treatment need radiotherapy and chemotherapy
What does liver cancer have to do with yogurt
How is hepatitis small 3 Yang treated
How is liver damage treated
What treatment effect will be good after liver cancer operation
How is metastatic liver cancer diagnosed
What is the effect of hedyotis diffusa on patients with advanced liver cancer
What is the effect of argon nuclear knife on liver cancer
What item does liver cancer check
Can liver cancer recurrence be treated with biological immunotherapy
Is blood screening for cancer useful
How is liver abscess checked
How does liver cancer get up vomit to treat
How to treat intracranial metastatic tumor
How is nccn liver cancer treated
How does liver cancer advanced hemoptysis do
Why does liver cancer late meet hypertension
What are the symptoms of advanced liver cancer before death
What is the symptom of melena
What does cancer shoulder pain look like
Liver cancer advanced liver coma how to do
Why is the abdomen big in advanced liver cancer
What is the cause of vomit in late liver cancer
How does late liver cancer finally die
What is the best period of surgical treatment of liver cancer
Liver cancer or cirrhosis how to judge
What should liver cancer late eat
What method does just finish liver cancer tumour excision have to treat
10 What is non-fatal cancer
What are the symptoms of tummy growth
How is the course of chemotherapy
What is the symptom before the death of the patient with advanced liver cancer
Liver cirrhosis advanced liver cancer advanced how to do
What is the explanation of cancer in Chinese medicine
How to be sure it is not liver cancer
Why conservative treatment for advanced liver cancer
What medicine does liver cancer tongue pain take in advanced stage
What kind of liver cancer can't do surgery
How long is the natural history of liver cancer
What are the symptoms of advanced tumors in the digestive tract
How does liver space-occupying change disease treat
What are the early symptoms and precursors of liver cancer
What are the symptoms of dying patients with liver cancer
What are the 6 most common early symptoms of liver cancer
How does hepatic artery embolization of liver cancer chemotherapy
What milk powder is suitable to drink in advanced stage of liver cancer
What is the reason of late liver cancer jaundice eye yellow
How does liver cancer patient cold do
Right rib pain is liver cancer
How is secondary liver cancer diagnosed
What reason does tumor three normal get cancer however
What is the imaging manifestation of liver cancer
What are the symptoms of liver cancer in the last week before death
What food should liver cancer late eat
Is biological immunotherapy useful for liver cancer
What about hematuria in advanced liver cancer
What disease is whole body dropsy
How is late liver cancer recurrent fever to return a responsibility
What is the cause of abdominal pain in advanced liver cancer
What does hemoptysis mean in advanced stage of liver cancer
What nutritive product does liver cancer patient eat
AFP value exceeds the normal value, whether it is liver cancer
What is good for constipation in advanced stage of liver cancer
What easy to get liver cancer
How does liver cancer late hemorrhage do
How to do in the advanced stage of primary liver cancer
How is liver occupying lesion treated
Is there no cancer if tumor markers are normal
Liver cancer patients at home, what to eat at ordinary times
What is the adverse reaction after primary liver cancer chemotherapy
What symptom does disease have on liver
Why is the spirit of liver cancer advanced still very good
Liver cancer late pain how to do
What is the staging standard of liver cancer
What symptom is female liver cancer prephase
Hiccups in the late stage of liver cancer
What is anatomical hepatectomy
How is primary liver cancer diagnosed
Why can drink alcohol get liver cancer
How to prevent liver cancer rupture and hemorrhage
How to do more than 30 years old liver cancer late
Can cancer patients drink alcohol
Liver cancer metastasis lung cancer fever what reason is headache
Why does late liver cancer develop so fast
What dish can liver cancer eat relieve
What is the cause of the red dot of the whole body before the death of advanced cancer
Liver cancer advanced liver ascites foot swelling how to do
How to eliminate liver cancer cells
What are the early symptoms of liver cancer? What does the early symptom map look like
What is the role of rubeseed
What kind of pain in the right shoulder is cancer
How does liver cancer swell belly do
What method does advanced liver cancer patient face turn yellow to have
What is liver cancer return visit time
Diarrheal liver cancer how to eliminate
What symptom is liver cancer at ordinary times
What symptom is female liver cancer late how to treat
Why is scrotum swollen in advanced stage of liver cancer
What is liver cancer death process
What kind of person is easy to get liver cancer
What performance does liver palm have
What is the signal of early liver cancer
What soup can you drink after liver cancer surgery
What symptom can liver cancer appear
What are the symptoms 10 days before liver cancer death
Why does liver cancer late ache
Liver cancer emphysema spleen is advanced
What does late liver cancer fever indicate
What symptom does liver cancer have excuse me
How does liver cancer late liver area pain do
What symptom does ascites have
After advanced liver cancer chemotherapy, the liver part is more painful, is chemotherapy useless
What is the symptom two days before liver cirrhosis dies
How does the patient of liver cancer of advanced stage pain do
What are the precipitating factors of cancer symptoms
What are the specific symptoms of advanced primary liver cancer
Liver cancer later waist pain, what method is there
How to diagnose is liver cancer excuse me, early or late
What symptom does small liver cancer have excuse me
What kind of cancer lump
Where is the human liver
What food does liver cancer late pain eat
Why is liver cancer found when most is advanced
What to do about cancer fever
What is the relationship between hepatitis, liver fibrosis, cirrhosis and liver cancer
What is the cause of late liver cancer hiccups
How long is the life of liver cancer
How to deal with malignant liver cancer
What is the sequential treatment of liver cancer and lung cancer
What contraindication does cancer patient have
What symptom does liver cancer patient have late dying
How is the liver cancer advanced what symptom does not have
How should excuse me liver cancer late be treated, what medicine to eat to stop ache
How does liver cancer patient vomit blood and pull blood
Can liver cancer middle-late patient eat pupae
What symptom does liver cancer turn lung to have
What are the symptoms of gastric CA
What are the symptoms of liver cancer metastasis to the lung
What are the three indicators of cancer
Can advanced liver cancer still be cured, what are the symptoms
How does liver cancer late hemoptysis pull blood do
Why is liver cancer found to be advanced
What contraindications does liver cancer surgery have
What is the indication of liver cancer surgery
What are the symptoms 1 hour before dying of advanced liver cancer
What are the criteria for defining high-risk groups of liver cancer
What does metastatic lung cancer mean
Is emphysema a complication of liver cancer
What is the long-term fever
What is the main symptom of advanced liver cancer lung metastasis
What is jaundice
How is secondary liver cancer checked
What symptom is shoulder pain caused by liver cancer
Primary liver cancer, how does late body turn yellow
Liver cancer late hemoptysis what food to eat good,
What is late throat stiff of liver cancer
What does liver cancer infect through
What is the traditional Chinese medicine explanation for cancer
Why is there no positive shape in the middle stage of liver cancer
How does advanced liver cancer ascites maintain
What symptom is there before dying of advanced liver cancer
How does liver cancer late painful foot swell do
Liver cancer late fever is good or bad
What symptom will appear in the early stage of liver cancer
What are the advantages and disadvantages of extracting ascites in advanced stage of liver cancer
What are the early symptoms of small liver cancer
Liver cancer diarrhea, foot swelling, how to improve
Why do patients with advanced liver cancer have swollen feet
What meal does liver cancer advanced stomach bleed eat
What is liver cancer hypertension related to
What kind of liver cancer can not be treated surgically
Test which blood is an indicator of cancer
What are the advanced symptoms and manifestations of liver cancer
What does hepatic mt mean
Is emphysema a complication of liver cancer
CT has shadow, calcification point, is it liver cancer
What is Aspergillus flavus
End-of-life symptoms of liver cancer
Survival of foot edema in advanced liver cancer
Whether liver cancer is contagious
What are the dietary taboos for cancer patients
Preliminary identification is how to treat advanced liver cancer
What is the cause of hiccups in advanced cancer
What symptom is liver cancer ascites late
Complications of liver cancer surgery
How to avoid the occurrence of liver cancer in life
What are the symptoms of liver cancer ten days before death
What early symptom does liver cancer have
How does liver cancer late abdominal distension have ascites treat
What is the index of cancer blood test
How is advanced liver cancer patient to return a responsibility with hemoptysis
What symptom can liver cancer appear
What does liver cancer ascites have late symptom
What are the symptoms 2 months before the death of liver cancer
What is the reason that liver cancer late eats vomit
Whether advanced liver cancer has infectivity
What is the way to relieve liver cancer
What does liver occupying mean
How is liver tumor diagnosed
What symptom does liver cancer have early
What is the reason that liver cancer is late face yellow
Why does the patient of liver cancer late have a fever
How is liver cancer late hypotension pull blood to return a responsibility
How does liver cancer late fever do
Why can the foot of liver cancer late be swollen
What does pathological classification of liver cancer mean specifically
What complication does liver cancer have with anhydrous alcohol treatment
What symptom does liver cancer not treat can cause
Is a cystic mass cancer
What are the symptoms of hepatitis C
How to exercise for liver cancer
Do liver cancer patients have to stop drinking
What are the symptoms of metastatic lung cancer
What drug does liver cancer advanced lung metastasis take
What symptom does liver cancer tongue have
Is liver cancer in advanced stage asymptomatic however how to return a responsibility
What is the symptom 2 days before dying of liver cancer
What are the hazards of advanced liver cancer
What are the MRI findings of primary liver cancer
What are the signs one day before death in patients with liver cancer
Premortem symptoms in patients with advanced liver cancer
How to prevent Cancer
What are the symptoms of liver cancer in general
What is the transcatheter arterial chemoembolization of liver cancer
What stage is 5cm size of liver cancer
Why is the foot of advanced liver cancer swollen
What symptom does liver cancer show in late stage
What are the diagnostic criteria for liver cancer
What are the complications after radiofrequency ablation of liver cancer
What symptom will the patient of liver cancer appear at advanced stage
What does liver cancer mean by high blood pressure
What supplement does liver cancer patient eat
What is liver pain symptom
What symptom does liver cancer appear to metastasize to have
What is the cause of late death of liver cirrhosis
How is right shoulder pain liver cancer
What can liver cancer patients eat to relieve symptoms
What are the end-of-life symptoms of patients with advanced liver cancer
What symptom is advanced liver cancer metastasis to the stomach
Does liver cancer late eat meat not digest
What is late liver cancer do chemotherapy common side effect
What symptom does liver cancer spread have
What is the painful location of liver cancer
What are the symptoms of liver cancer in the earliest 3 months
What does liver cancer patient eat more suitable
Why does liver cancer have blister in late stage
How does liver cancer patient do without urine
How to diagnose liver disease
What are the symptoms of advanced liver cancer before death
What are the symptoms of advanced liver cancer before death
Liver cancer patients appear foot swelling, how to do
What cancer is not fatal
What are the clinical symptoms of liver cancer
What tea to drink to prevent cancer
What is the normal value of hepatitis C RNA quantification
What reason does liver cancer late foot swell
Can liver cancer patient eat peanut
What is the symptom of lung metastasis of liver cancer
What is the dietary contraindication of cancer
Liver cancer tumor has 3 centimeters big serious is advanced
How should hydrops after liver cancer operation do
Liver cancer patients appeared jaundice and ascites how to do
What is the fever after liver cancer embolization surgery to return a responsibility
What does liver cancer have to do with cerebral infarction
How does advanced liver cancer appear ascites
How does liver cancer reduce jaundice
Cancer 20 year survival ranking
How to detect early liver cancer
How does liver cancer lower limb cold do
How to do body weakness after interventional treatment of advanced liver cancer
How should ascites appear in advanced liver cancer
What is early cancer, microcancer, occult cancer
How does the body of liver cancer late produce purple return a responsibility
Is space occupying cancer
How to check inflammatory pseudotumor of liver
How does liver disease cause splenomegaly do
How does liver cancer recur again
Family members just diagnosed with advanced liver cancer, want to know the survival rate of liver cancer
Which cancers can be treated with proton therapy, and how effective is it
Liver cancer is late always how to return a responsibility with fever.
How does stomach rise in late liver cancer do
How to do after interventional therapy of advanced liver cancer
Liver cancer recurred after operation, how to do
How is the skin of liver cancer patient more and more yellow return a responsibility
CT identification of hepatic cysts and liver cancer
How to do middle liver cancer often loose belly
Does ginsenoside have effect to liver cancer
How does ascites disappear at the end stage of liver cancer return a responsibility
Liver cancer tummy bloat how to do
How is liver cancer patient palm both sides very red to return a responsibility
What kind of sweating is cancer sign
Have liver cancer can't eat how should do
How to deal with serious liver cancer
What is the effect of 6 years of interventional therapy for advanced liver cancer
Liver cancer always has a fever how is burp vomit return a responsibility
How is liver cancer late face yellow to return a responsibility
What is the accuracy rate of tumor three check cancer
Excuse me, get liver cancer how to do
How does the eye yellow return a responsibility
How is the curative effect evaluation standard after radiofrequency ablation of liver cancer
How to do appendiceal tumor
Liver cancer appears jaundice and ascites how to do
How is the umbilical of liver cancer patient bulging to return a responsibility
How to do with blister on liver
How does liver cancer person burst thin do
What are the three test indexes of cancer
Liver cancer too fast how to do
How does liver cancer late stomach distention do
How to do in the middle and late stage of liver cancer Xuan move
What is the condition of liver cancer embolization intervention
How to do to infect hepatitis B after adult
Does early liver cancer have blood flow signals
How to do cancer prevention physical examination
What are the early symptoms of liver cancer by B-ultrasound
How is the effect of red technique leopard claw grass to treat second liver
How does liver cancer late tummy bloat do
Can liver cancer late do liver transplantation how to do
Liver cancer abdominal hard how to do
How does liver cancer late abdomen have a fever return a responsibility
How does liver cancer late body itch badly to do
What is the enhanced CT performance of liver cancer
How to check out hepatic ascites
Liver cancer advanced tumor grows how to do in portal vein
How to divide liver cancer cells
How to cauterize liver cancer
Liver cancer late suddenly eat not much how to do
Liver cancer shield how to return a responsibility
How does the recovery period after liver tumor resection have ascites
How to deal with pulmonary bullae after radiotherapy for primary liver cancer
What about the effect of interventional therapy for advanced liver cancer in 6 years
What are the three early signs of gastric cancer
Does panax notoginseng have an effect on cancer
Got liver cancer how just good
[truncated: 11,287 more rows]
[truncated: 5 more columns]

## Sheet: Corpus on liver cancer issues2
The problem
A second recurrence after surgical resection of a primary liver cancer
I greatly advanced liver cancer, has liver ascites can also be treated at the beginning said lumbago
There is a problem on the liver that needs what check
What to pay attention to after liver cancer surgery diet
What preparation should be done before radiofrequency ablation of liver cancer
There are several types of liver cancer
What are the common serious complications of liver cancer in clinic
How long does the liver cancer have fever and stomachache after interventional therapy
What are the precautions during interferon therapy
What items should be checked after liver cancer surgery
What should be paid attention to in the follow-up of chest tightness after liver cancer intervention
How long can radiofrequency ablation of liver cancer recover
The doctor said that the preliminary diagnosis was liver cancer
The cost and effect of interventional therapy after liver cancer surgery are good
Can "argon-helium knife" be used to treat liver cancer
What are the indications for trisegmentectomy
How to care for secondary liver cancer after interventional therapy
Got liver cancer what should diet notice
Determine whether liver cancer should do what examination
Liver cancer resection, liver cirrhosis, big three Yang, ask the index of check below now serious
B ultrasound twice, can you say this is liver cancer
Treatment liver slip operation which hospital is good
What are the effects of radiofrequency ablation on the liver area
How can liver cancer relapse in two months be controlled
Liver cancer can be cured
What causes liver injury
Regular hospital treatment of liver cancer price
Which nutrient solution should be transfused in advanced stage of metastatic liver cancer
Which liver tumors are suitable for laparoscopic surgery
What are the indications and contraindications of interventional therapy for liver cancer
When can small liver cancer do interventional therapy and radiofrequency ablation
Liver cancer after interventional therapy for a week can eat fish
Must radiofrequency ablation be done after liver cancer interventional therapy
Provincial people's hospital treats liver tumor how much money
More and more red spots on the body, Baidu said that there is a problem with the liver
Suspected liver cancer need to pay attention to what problems
What are the clinical manifestations of liver failure
Which is better for the treatment of liver cancer with radiofrequency ablation or surgical resection
Can Gamma knife surgery treat liver cancer and liver metastases
What diseases can be detected by color Doppler ultrasound of liver, gallbladder, spleen, kidney and pancreas
125 iodine particles in the treatment of liver cancer should note what
What are the advantages of Da Vinci robotic surgery in the treatment of liver cancer
What problems should be paid attention to on the diet of liver cancer
Is the recurrence rate of liver cancer after radiofrequency ablation high
What do you notice on diet for advanced liver cancer with abdominal pain and abdominal distension
Can food mildew induce liver cancer
Can radiofrequency ablation cure liver cancer
Pain after regorafenib for liver cancer
Which hospital is the best to treat liver tumors
What tests are needed for chronic abdominal pain
Surgical Hospital for treating liver tumors
Can radiofrequency ablation of liver cancer be repeated
Which is better for the treatment of liver cancer with gamma knife radiotherapy or radiofrequency ablation
How to care for liver cancer after surgical resection
Liver cancer and which dietary habits are related
Is liver cancer surgery for everyone
What tests to do if liver cancer is suspected
Is radiofrequency ablation of liver cancer painful
Is interventional therapy necessary after surgical resection of liver cancer
What minimally invasive surgery for liver cancer includes
See liver cancer patient excuse me, what thing is more appropriate
Liver cancer does radiofrequency ablation can live a few years
What are the advantages of argon-helium knife cryoablation therapy for liver cancer
What are the dietary contraindications and precautions for patients with liver disease
Is the stabbing pain under the right ribs liver cancer
What to look out for after early liver cancer symptoms
Can estrogen and progestogen be taken orally in liver transplant patients with liver cancer
Which organs do liver cancer easily metastasize to
After radiofrequency ablation treatment of liver cancer
Liver cancer recurred 2 months after operation
What should be paid attention to in palpation of liver cancer
What tests are needed to diagnose liver cancer
How long does it take for liver cancer to recover from interventional surgery
Whether liver cancer can be resected
Can a chest X-ray detect liver cancer
How to intervene in several complicated cases of advanced liver cancer
Does radiofrequency ablation of liver cancer have a high success rate
What do liver cancer patients need to pay attention to in terms of diet after interventional therapy
What should be paid attention to in the first course of liver cancer
Is liver resection risky
What tests should be done before radiofrequency ablation of liver cancer
Is the pain under the right ribs in the upper abdomen liver cancer
Got liver cancer on diet should notice what good
Liver cancer patients need to do what to prepare for liver transplantation
Does liver cancer cause serious gastrointestinal bleeding
What are the main routes through which liver cancer metastasize
What are the adverse reactions of radiofrequency ablation for liver cancer
Can advanced liver cancer be treated conservatively
What precautions should be taken for patients with advanced liver cancer after minimally invasive surgery
How can advanced liver cancer be treated to relieve the suffering of patients
What are the advantages of iodine-125 seed implantation in the treatment of liver cancer
How long can interventional therapy be performed after radiofrequency ablation of liver cancer
Who should pay the most attention to prevention of liver cancer
How long should the interval of interventional therapy for liver cancer be
What should be paid attention to after liver cancer metastasis to the lung
Why do liver cancer cells metastasize
Can liver cancer chemotherapy kill cancer cells completely
What to do before liver cancer surgery
Treat liver cancer surgery to the best hospital
What preparations should be made before liver cancer surgery
Treatment of liver cancer specialized hospitals
Liver cancer bone metastasis, excuse me how to treat the next step.
That hospital has the best treatment for liver cancer
Is radiofrequency ablation effective in the treatment of liver cancer
Which HCC patients are eligible for minimally invasive techniques
What are the oxaliplatin chemotherapy options available
How long to recover after liver cancer interventional therapy
What are the interventional treatment of liver cancer and how many times to do it
Can interventional therapy be performed for metastatic liver cancer
What are the causes of subcostal pain in the right abdomen
What should be noted on liver cancer diet
Suspected liver cancer to do what examination
What to pay attention to in liver cancer inhalation
What are the precautions after minimally invasive liver surgery
Is it safe to have no recurrence of liver cancer after interventional treatment for 5 years
Liver cancer do what examination can detect come
What are the indications for radiofrequency ablation of tumors
After liver cancer operation can take ginseng one capsule need to take how long
What reexaminations are needed after radiofrequency ablation of liver cancer
What tests are needed to confirm liver cancer
What tests are needed before liver cancer surgery
B-ultrasonography of liver cancer in its early stage
Can small liver cancer not recur in 5 years be good
Is tongue base green tendon black liver cancer
What are the cautions of right hemihepatectomy
Which diseases are easily misdiagnosed as liver cancer
How long can early liver cancer surgery recover to be cohabitated
How to reduce the pain of advanced liver cancer
Liver cirrhosis patients with advanced liver cancer hospital said that the maximum three months of pain
Where does liver cancer usually metastasize
What are the worries and shortcomings of the treatment plan of various liver cancer how to choose
Liver cancer appetite is good need to pay attention to what problems
Liver cancer patients in the diet should pay attention to what problems
Can radiofrequency ablation be combined with surgery to treat liver cancer
What are the possible adverse reactions of radiofrequency ablation in the treatment of liver cancer
Determining which enzymes can assist in the diagnosis of liver cancer
What are the indications of minimally invasive interventional therapy for liver cancer
What are the cautions of ultrasound-guided microwave ablation in the treatment of liver cancer
What should be the next step in the treatment of liver cancer
What are the causes of right abdominal pain
Can liver cancer be controlled
Liver cancer is easy to metastasize to which organs
The differential diagnosis of liver cancer with which diseases
How to avoid misdiagnosis of liver cancer
What are the tumor marker tests for women
What problems should be paid attention to in advanced liver cancer
Is the dry cough more than a month after early liver cancer surgery recurrence
What preparation is needed before liver cancer surgery
How often to get out of bed for liver interventional surgery
Liver cancer does interventional what response
How long to do radiofrequency ablation after liver cancer embolization interventional therapy
Whether the systemic bone pain has metastasis within 5 years after liver cancer operation
Radiofrequency ablation or microwave ablation for the treatment of liver cancer
Liver cancer diet need to pay attention to what problems
What are the relevant auxiliary examinations of primary liver cancer
What are the causes of right upper abdominal pain
What tests are needed to confirm liver cancer
Liver cancer diet should pay attention to what problems
What are the conditions for liver transplantation
Liver cancer is treated several times a month
Can radiofrequency ablation eradicate liver cancer
To which organs does liver cancer metastasize
What should we pay attention to after precise liver resection
Treatment of liver cancer which hospital is good
Liver cancer face white and anemia face white, can be seen
Liver cancer can do a few interventions
What examinations should be done before hepatic vascular intervention
Questions to know about liver cancer
Which hospital is the best to go to for liver cancer treatment
Which hospital treats liver cancer
Hospital treatment of liver cancer prices
What are the nursing after interventional microwave ablation
Causes of occasional stinging pain in the hepatic region
Causes of pain in the liver region of running
Got liver cancer what should notice on diet
B liver, mother-to-child spread, the year before last, the mother checked out early liver cancer, has been cured
Liver cancer lung metastasis has what clinical manifestation
How long does the process of liver cirrhosis to liver cancer probably take
Liver cancer, recent bone pain, took a piece, excuse me is transferred
What should the patient of liver cancer notice on diet at ordinary times
Can liver cancer metastatic lung eat bird's nest
How is right lower abdominal pain to return a responsibility after liver cancer operation
Liver examination ct is better or b ultrasound is better
How to treat advanced liver cancer with liver pain and abdominal distension and vomiting
How to care after liver metastasis surgery
What examination is needed to diagnose liver cancer
Liver cancer metastasis lymphoma do not eat anything
Draw blood to check tumor marker to be able to detect cancer
What time should be rechecked after liver cancer intervention
How long after liver cancer surgery usually start metastasis or recurrence
Under what circumstances should patients with liver cancer undergo open surgery combined with radiofrequency ablation
Is radiofrequency ablation prior to liver transplantation for liver cancer good
How to care for radiofrequency ablation of liver cancer
Early liver cancer has been cured by interventional therapy and radiofrequency ablation.
Where is liver pain generally located
What are the advantages of iodine 125 particles in the treatment of liver cancer
Better treatment of liver cancer hospital
What are the indications for intensity modulated radiation therapy
B-ultrasound precautions for liver cancer
Where to treat liver slip operation is better
What are the contraindications of liver transplantation
About taking Ganfule after liver cancer surgery
Liver cancer patients with large appetite need to pay attention to what problems
Primary liver cancer in what circumstances need surgery and need to pay attention to what
What are the factors affecting the treatment of liver cancer with gamma knife
I want to check whether I have liver cancer and what kind of tests I need to do
Vomiting after interventional surgery for liver cancer
Liver cancer surgery, according to now more than a year, disease details are done by MR Imaging
You can tell if you have liver cancer by checking the level of alpha-fetoprotein
Liver cancer chemotherapy can live how long
Multiple liver tumors, cirrhosis, hepatic ascites
How long can women live with hepatitis B
Can multiple liver cancer cure how long can live
How long can advanced liver cancer ascites live
How long does liver cirrhosis turn into liver cancer
How long do people with liver disease live
How long you can live with advanced liver cancer
How long can patients live with early-stage liver cancer
How long can hepatitis B carriers live
How long can you live after liver cancer surgery
How long can you live after surgery for advanced liver cancer
How long can you live with the treatment of advanced liver cancer
How long does hepatitis B develop into liver cancer
How long can you live with cancer edema
How long you can live after a liver replacement
How many hepatitis B patients are there in China
How long can patients live after interventional treatment of liver cancer
How long can hepatic encephalopathy live
7 physical examination tumor found high alpha fetoprotein
How long is hepatitis B survival
Can liver cancer patient eat soft-shelled turtle
How long is the survival time of liver transplantation
In the middle stage of liver cancer, how long can women survive
What are the symptoms of polygenic liver cancer
How long can liver cancer live generally
How long can you take targeted drugs for liver cancer
What is the normal value of liver function ALT
How long do people with hepatitis C live
How long do hepatitis B patients live
How long can you live with chronic hepatitis B
How long is the survival period of foot edema in advanced liver cancer
How much is the possibility of cure in the middle stage of liver cancer
How long can early liver cancer live at most
How long can you live with hepatitis B cirrhosis
How long can patients with liver cancer live after interventional therapy
How long can viral hepatitis B live
How long can you live with hepatitis
How long can you live with liver cancer
How long can hepatitis B live by drinking regularly
How long can you live with advanced liver cancer ascites
How long can patients live with advanced cancer
How long can you live with viral hepatitis B
How long will hepatitis B antiviral treatment take
Can fatty liver cause elevated alpha-fetoprotein levels
How many years can you live without treatment of hepatitis B
How long can you live with liver cancer
How long does the third stage of liver and brain disease survive
Liver cancer is advanced how long to eat Chinese herbal medicine
How long can you live in the middle of liver cancer
How long to live in the early stage of multiple liver cancer
How long is the survival of cirrhotic bleeding
How long can liver cancer survive by vomiting blood
How long can liver cancer live in the middle stage
How long can you live with chronic hepatitis
How long is the incubation period of liver cancer
How long do patients with advanced liver cancer live
How long can a hepatitis C patient live
How long can a liver cancer patient live with hematemesis
How long can you live after liver resection in advanced liver cancer
How much is the normal value of human leucocyte
Liver cancer foot swelling still can live how long
How long can patients with hepatitis B live
How long can cancer patients live
How long can you live with hepatitis B resistance
How long can you live in the middle stage of cirrhosis
How long can you live with malignancy
How long can people who have their livers removed live
How long can cancer live with itchy skin
Liver cancer advanced hematemesis survival is how long
How long can the advanced stage of primary liver cancer live
How long is interventional therapy for small hepatocellular carcinoma
How long is the survival time of brain metastases
Symptoms of advanced liver cancer, and how long to live
How long can moderately differentiated liver cancer live
How long can you live with advanced liver cancer
The most you can live with liver cancer
Can normal liver function get liver cancer
How long can primary liver cancer live
How long can primary liver cancer live
How long can advanced liver cancer live
How long can you live with viral hepatitis
What is the average survival time for liver cancer
How long do you live in advanced liver cancer
How long can you live with interventional treatment of liver cancer
What is the normal value of ADA
Can liver function tests detect liver cancer
Is severe fatty liver serious
? What are low-density nodules in the liver
Can hepatitis B carrier be contagious
Can color ultrasonographic check cirrhosis and liver cancer
b ultrasound examination of moderate fatty liver can get liver cancer
Where is the position of the left lobe of liver
Does eating birch bile have an effect on liver cancer
How to care for liver cancer ablation surgery
Do liver function test can detect liver cancer
Is acute hepatitis serious
Liver cancer general liver function which a few items can be high
Can hepatitis infect
C liver and B liver both have what distinction
How to care for metastatic liver cancer
Does cirrhosis turn into liver cancer
How is liver area dull ache to return a responsibility
What effect does liver cancer plase show
What reason is liver function impaired
Can fatty liver heal itself
Can interferon treat chronic hepatitis B
In addition to hepatitis B and fatty liver what cause transaminase to be on the high side
What does fatty liver diet contraindication have
Do you have any side effects on the liver
Can an 84-year-old patient with liver cancer have surgery
Is a low-density lesion of the liver cancer
What is the reason why patients with liver cancer feel dyspnea
How to carry out nursing work for patients with liver cancer
Will fatty liver gradually develop into liver cancer
? Do many people get nodules on the liver
Can liver cancer patient appear liver failure
Is emphysema metastasis found in patients with liver cancer
Why does liver cancer patient appear jaundice
Can normal liver function still get liver cancer
Liver cancer how long color ultrasound can be detected
Can the cornea of liver cancer patients be used
How is mild fatty liver checked
AFP is always within the normal range. It may be liver cancer
Could fatty liver cause this liver cancer
What are the causes and hazards of high aspartate aminotransferase
How to return a responsibility with multiple low density nodules in liver
Does cirrhosis turn into liver cancer
Can B liver smoke
Can hepatitis certainly transform into liver cancer
Is the bleeding from the liver severe
Will cirrhosis evolve into liver cancer
Moderate fatty liver, what should diet notice can turn to liver cancer
Why liver cancer interventional tumor will shrink by half
Do liver cancer ablation procedures have a high success rate
Does hepatitis eventually develop into liver cancer
Cm liver nodule is liver cancer
Can liver bile duct dilatation be cured
Do patients with cirrhosis progress to liver cancer
Can liver function also diagnose liver cancer
Is it possible for severe fatty liver to transform into liver cancer
Low density shadow is likely to have liver cancer
Can Longya Gantai treat liver cancer
Can hepatobiliary spleen color ultrasound check liver cancer
Can liver cancer be transfused fat emulsion
Is eating cordyceps sinensis good for liver cancer patients
C and B hepatitis which serious
How to return a responsibility with diffuse lesion inside liver
Get B liver serious
Liver cancer can endanger life ah
Is the operation success rate of intrahepatic cholangiocarcinoma high
What is the principle of iodine-125 particles in the treatment of liver cancer
How is medium fatty liver checked
Is the liver tumor serious
How often liver cirrhosis with nodules is easy to become cancerous
Can long-term stagnation of liver qi cause liver cancer
Is hepatomegaly serious
Small three Yang liver function normal can get liver cancer
What is the harm of serious fatty liver
Can iron ions be removed from the body to treat liver cancer
Now I am a hepatitis B patient, and there is nothing wrong with my body.
What causes hepatitis to easily turn into liver cancer
Does liver cancer affect liver function
Will hepatitis evolve into liver cancer
Will the degree of liver cirrhosis be aggravated after radiotherapy in patients with liver cancer
What are the hazards of high liver function indicators
Can liver cancer be detected more than super
Can liver cancer have diarrhea
Fatty liver can cancerous change
Is nodular liver cancer serious
How to return a responsibility with multiple low density foci in the liver
What items should be checked in second liver
Will hepatitis become liver cancer? Will the hepatitis that has treatment not become liver cancer
Will alcoholic liver turn into liver cancer
Is it expensive to treat liver cancer with microwave ablation
Are liver function indicators important in patients with liver cancer
Can liver function test detect liver cancer
Liver hemangioma can become liver cancer
Can long-acting interferon cure chronic hepatitis B
Can the hypoechoic area of the liver be cancer? There are several possibilities for the hypoechoic area of the liver
How is transaminase of liver function high return a responsibility
Be infected B liver how many years will transform liver cancer
Is the success rate of intrahepatic cholangiocarcinoma surgery high
Why regular examination for chronic hepatitis B management
Is hepatic angiosarcoma serious
Can liver cancer eat salad
Can liver cancer cause an abscess
Can liver cancer liver ascites discharge stool infect
Will advanced liver cancer intervention aggravate liver ascites
Can abnormal liver function get liver cancer
Can liver metaplasia cause liver cancer
Is a negative liver tumor serious
How to care for small liver cancer
How long should hepatitis evolve into liver cancer generally
How much glutamic acid transaminase is high can be judged to be liver cancer
Is the liver cancer that causes excuse me to be able to infect in the middle period
B ultrasound can exclude liver cancer
Will hepatic cysts transform into liver cancer
What does chronic liver failure mean by decompensated period
Alanine aminotransferase on the high side how much is hepatitis
Check liver function to find cancer
B liver body check what item
Can play antibody after liver cancer changes liver infect
Fucosidase how high is liver cancer
Does hepatitis turn into liver cancer
Liver ascites can infect
What is the seven items that second liver patient needs to check regularly
How to care for hepatitis B
How to confirm hepatitis B turns to liver cancer
Is intrahepatic metastasis of liver cancer very serious
What are liver function items
Liver cancer and high blood lipids together how to return a responsibility
b ultrasonographic liver can detect liver cancer
How does the tumor grow on the liver return a responsibility
Liver cancer tumor diameter 10 centimeters can live how much time
Can liver calcification be cancerous
Can liver color ultrasound detect liver cancer
How long will the liver region still swell after advanced liver cancer surgery last
What causes asthma in patients with liver cancer
Is small liver cancer misdiagnosed as hemangioma
Can primary liver cancer lead to high blood sugar
Can color Doppler ultrasound detect liver cancer
Is the harm of calcification in right lobe of liver big
Can hepatic steatosis induce liver cancer
Liver S8 segment liver cancer is serious
Is the hepatitis serious?
Will intrahepatic bile duct stones become liver cancer
Will liver cancer hematemesis die immediately
Can liver cancer eat longan
Can liver cancer patients eat an Gong Niuhuang pill
Liver function of physical examination today, some index is on the high side, can it be liver cancer
Can B liver five check out C liver
What harm does liver function have high
How does liver cancer care
Is the cure rate of second liver interferon high
Is liver function abnormal transaminase to return a responsibility with high
What is the cause of the small piece of low density shadow in the liver
Can a cold eat soft-shelled turtle
The danger of high transaminases
Got liver cancer can transfer
Will second liver certainly become liver cancer
Severe fatty liver harm
Can medium-term liver cancer do gamma knife
Can abnormal liver function infect
Can liver stones turn into liver cancer
Will liver cancer develop quickly
Can liver cancer not eat sweets
How does female mild fatty liver do
Is a low-density lesion in the liver a tumor
Can liver cancer patients be vaccinated against COVID-19
Can liver cancer eat Onions
How to check severe fatty liver
Why is hepatitis C more easy to transform into chronic hepatitis than hepatitis B
Is hepatic hemangioma serious
Liver cancer liver coma how to care
Can laboratory liver function detect liver cancer
How to care for liver tumor
Is the success rate of liver cancer interventional therapy high
How to care for liver malignant tumor
Can small liver cancer be intervened
3 cm liver nodule is liver cancer
What is the efficacy of cinobufagin tablets in the treatment of tumors
How to treat giant liver cancer with intrahepatic metastasis
Prevention and interventional treatment of primary liver cancer
Which liver cancer patients are suitable for interventional therapy
Advances in targeted therapy for liver cancer
How long is normal for fever after interventional therapy for liver cancer
How is the latest diagnosis and treatment plan of liver cancer
How to treat bone metastasis of liver cancer
What are the precautions of antiviral therapy in patients with hepatitis B
What is the advantage of liver cancer interventional therapy
How to treat primary hepatocellular carcinoma
What are the ways to fight liver cancer
Can traditional Chinese medicine cure intrahepatic cholangiocarcinoma
What are the advantages of traditional Chinese medicine in the treatment of liver cancer
Does chemotherapy be required after liver cancer surgery
What are the advantages of traditional Chinese medicine in treating liver cancer
Can the long tumor on the liver be treated minimally invasive
How to care for patients with liver cancer
What are the causes of liver cancer
What are the advantages of interventional therapy for liver cancer
Interventional treatment of liver cancer Can vascular interventional therapy cure liver cancer
Can liver cancer be treated conservatively
Can advanced liver cancer be treated well
What treatment method does liver cancer patient choose to compare good
Interventional therapy for advanced liver cancer is painful
To analyze the treatment policy of primary liver cancer
What do patients with liver cancer need to pay attention to
How long can you eat after liver cancer interventional therapy
Will liver cancer interventional therapy recur
Liver cancer patients can eat pig liver
How to treat postoperative recurrence of liver cancer
Can advanced liver cancer be treated with thermal ablation
What tests should be done after interventional therapy for liver cancer
Can liver cancer portal vein tumor thrombus be treated
How to diagnose and treat metastatic liver cancer
Which liver cancer patients can be treated with surgery
Hello doctor, can advanced liver cancer be cured
Liver cancer interventional therapy has what response
What should liver cancer patients pay attention to in life
Treatment of metastatic lymph nodes in liver cancer
How to distinguish between liver cancer and hepatic hemangioma
What tests to do for liver cancer
Does fatty liver need treatment
Which liver cancer patients are suitable for interventional therapy
How to care for liver cancer after interventional therapy
What are the advantages of TCM in the treatment of liver cancer
Is the interventional treatment of liver cancer painful
Does intrahepatic metastasis of liver cancer need chemotherapy
What are the benefits of treating liver cancer with TCM
Treatment of gallbladder tumors with liver metastases
How can liver cancer be treated just good
Can get liver cancer cure
Can early resection of liver cancer be cured
How can liver cancer be cured
Excuse me liver cancer, middle and advanced liver cancer, can you still treat Shu
Can abnormal liver function be cured
Is the white ball ratio 1:1 normal
How much liver cancer weight will be lost
Can advanced liver cancer be treated with ultrasound ablation
Can hepatitis be cured completely
Patients with liver cancer under what condition need interventional therapy
Can liver cancer spread well
Methods of interventional treatment of the liver
Liver cancer is not serious can cure
Is there conservative treatment for advanced liver cancer
Excuse me, the Chinese medicine that liver cancer metaphase treats method
Liver cancer interventional therapy needs to do how many times
How to choose the treatment of liver cancer
Which patients are suitable for interventional treatment of liver cancer
What is minimally invasive interventional therapy for metastatic liver cancer
Do patients with liver cancer still need treatment after surgery
Can gastric cancer metastasis to liver cancer be cured
There are several chemotherapy options for liver cancer
Can advanced liver cancer from pancreatic cancer be cured
How often do patients with liver cancer need to be reexamined after surgery
Can intrahepatic metastasis of liver cancer be surgically treated
What is the normal range of alanine aminotransferase
How much does interventional therapy of liver cancer cost once
Can liver cancer caused by cirrhosis be treated
How does liver cancer treat method choose
Can liver cancer be cured at the beginning
How to choose the treatment of liver cancer
How is liver cancer caused
Is surgery the first choice for liver cancer treatment
What are the indications for targeted therapy of liver cancer
How often should patients with liver cancer be reexamined
Is radiotherapy painful for liver cancer
Can liver cancer patients eat chicken
What is the success rate of interventional therapy for liver cancer
Is liver function of second liver big 3 Yang normal need to be treated
How does Liver cancer metastasize?
The role of collateral vessels in the embolization of hepatocellular carcinoma
How much is targeted therapy for liver cancer a month
Can liver cancer do intervention cure
Can advanced metastatic liver cancer be treated with target items
What treatment method should liver cancer adopt is good
Is hepatic tumor liver cancer need how to treat
Liver cancer and liver common duct cancer, can not be treated
Can traditional Chinese medicine cure cholangiocarcinoma
What tests should be done for patients with liver cancer
Can advanced liver cirrhosis be cured
Patients with early stage liver cancer are suitable for surgery or interventional therapy
Giant liver cancer, interventional therapy, take targeted drugs, what good Chinese medicine do you have excuse me
What are the hazards of liver cancer not treated in time
A 55-year-old female patient with liver cancer, can be cured
What are the treatment methods of liver cancer in traditional Chinese medicine
What needs to be paid attention to in the follow-up treatment of liver cancer
How should liver cancer be treated
The best treatment for early liver cancer
What are the precautions after interventional treatment of liver cancer
Can early liver cancer be cured in the elderly
What do liver cancer patients need to pay attention to
Is hepatoma Crenulata useful
Whether liver cancer can be completely cured
Causes of hemoptysis in advanced stage of liver cancer
How is liver cancer caused
Liver cancer patients with pain should pay attention to what
Liver cancer still needs to be treated with medication after surgery
Advances in immunotherapy for liver cancer
What are the indications for interventional therapy of liver cancer
What are the complications of interventional therapy for liver cancer
Can liver cancer patients eat American ginseng
Do interventional therapy can cure advanced liver cancer
Can diet therapy cure liver cancer patients
How to cure liver cancer completely
Liver cancer caused by hepatitis has infectivity
Liver cancer does intervene how much money needs
Interventional therapy is suitable for patients with liver cancer
What are the advantages of treating liver cancer
Can advanced liver cancer coma be treated
What are the types and methods of minimally invasive treatment for cancer
Good hospitals treat liver cancer
What are the causes of vomiting in patients with liver cancer
What are the advantages of interventional therapy for liver cancer
Liver cirrhosis advanced liver cancer early can cure
Is advanced liver cancer interventional therapy painful
Can liver cancer change liver, what symptom has early, whether treat
Can cholangiocarcinoma be cured
What are the reasonable treatment methods for metastatic liver cancer
Can liver cancer be treated with radiotherapy
How to treat liver calcification
Is interventional therapy useful for advanced liver cancer
What are the indications for interventional therapy of liver cancer
Can advanced malignant liver cancer be cured
What is the interventional therapy of liver cancer and need to be treated multiple times
Can excuse me liver cancer early cure
What should the diet pay attention to during the treatment of liver cancer
What situations are not suitable for interventional treatment of liver cancer
What are the commonly used embolic agents for interventional therapy of liver cancer
What are the discomfort after gamma knife treatment of liver cancer
What are the ways God cures liver cancer
Liver cancer can be treated by hepatic artery cannulation under what circumstances
Is targeted therapy useful for liver cancer
Can liver cancer do well after interventional therapy
What are the embolic agents of liver cancer interventional therapy
Liver cancer interventional operation how much money
How to reduce the recurrence of liver cancer after radical treatment
Can liver cancer be treated with thermal ablation
What liver cancer can be treated with gamma knife
What should liver cancer patients pay more attention to on their diet
Patients with liver cancer are not suitable for interventional therapy
Liver cancer interventional therapy needs how much money
How to care for liver cancer patients
Liver resection or liver transplantation is the first choice for the treatment of liver cancer
How much colon cancer screening costs
How are liver cancer patients who cannot be operated on treated
How long to discharge from hospital after interventional treatment of liver cancer
How to treat liver cancer after operation
Treatment liver slip operation which is good
Can liver cancer eat American ginseng
What is particle implantation in the treatment of liver cancer and hepatobiliary cancer
What method does advanced liver cancer have to treat not painful
How is liver area a little painful to treat
Is primary liver cancer interventional therapy effective
Is radiation therapy useful for liver cancer
Can advanced liver cancer be treated with interventional therapy
How does the liver cancer that cannot do operation treat
Are liver cancer patients suitable for targeted drug therapy
How should the liver area pain of advanced liver cancer be treated to have what method
Which liver cancer patients are suitable for microwave ablation treatment
Can all patients with liver cancer be treated surgically
What are the complications of ultrasound interventional therapy for liver cancer
Can advanced liver cancer be treated by operation
Can early operation of liver cancer be cured well can be treated with biological immune therapy
How fast is liver cancer wasting
Which liver cancer patients are suitable for gamma knife treatment
How long does it take for lung cancer to reach the liver
Liver cancer interventional treatment needs to pay attention to what
How is liver cancer treated by interventional therapy
Can diffuse liver cancer change liver
What should patients with liver cancer pay attention to
How long can liver cancer patients be discharged from hospital after interventional treatment
What are the advantages of traditional Chinese medicine in treating liver cancer
How do liver cancer patients choose treatment methods
Can microwave ablation be used to treat liver cancer
Can atypical liver cancer be cured
What are the ways to treat liver cancer
How much is the fever after interventional treatment of liver cancer
Can advanced liver cancer be cured
What are the contraindications of interventional therapy for liver cancer
What is the probability of living for 20 years with conservative treatment of liver cancer
Which liver cancer patients are suitable for gamma knife treatment
How to treat liver cancer quickly
Can alcohol liver be cured
Is advanced liver cancer interventional therapy good
What aspects should be paid attention to in daily life of patients with liver cancer
Can hepatocellular carcinoma be cured
Does hepatitis B cirrhosis need antiviral therapy
18 years of survival after interventional therapy for liver cancer
What tests are needed for liver cancer
Is liver interventional therapy painful
Is the liver function of big three Yang normal need to be treated
Can long tumor on liver be cured
What way can patients with advanced liver cancer be treated
Can early detection of liver cancer be treated
Can liver cancer be operated on
Can early liver cancer be cured
Four methods of interventional therapy for advanced liver cancer
How to treat mild liver cancer
How long to review after interventional treatment of liver cancer
What are the ways in which liver cancer enters the bone
Can advanced liver cancer be treated with current technology
What are the means of interventional therapy for liver cancer
What are the disadvantages of liver interventional therapy
Can ablative surgery cure liver cancer
What are the interventional treatment methods for liver tumors
What diseases can be treated by interventional therapy
What should liver cancer patients pay attention to
Can excuse me suffer from liver cancer to treat
How is the effect of biological treatment method of advanced liver cancer
Which cancers are eligible for PD1 therapy
How long to review after radiotherapy for liver cancer
What can you eat on liver cancer diet
Can liver cancer eat red beans
How to treat diarrhea after liver cancer ascites
Is early liver cancer terrible
Advanced liver cancer, ascites, finding a prescription
Can liver cancer patients eat Onions
Liver cirrhosis, liver ascites, primary liver cancer is possible
What does high fibronectin represent
Is liver cancer severe with ascites
Is liver ascites infectious as liver cancer
Can you eat sea cucumber recuperation after liver cancer surgery
Can liver cancer gecko eat
Can liver cancer ascites be smoked
Is bleeding in the stool cancer
Is the rupture of liver cancer advanced
Could hypoechoic areas of the liver be cancer
Got the person of second liver, can't really be treated well
How does liver cancer itch to return a responsibility
What fruit does liver cancer eat better
Can the patient of liver cancer advanced dry fruit kind eat
Peanut butter liver cancer can eat
Can liver cancer still be operated on
Is abnormal liver perfusion cancer
Diffuse advanced liver cancer with hepatic ascites
Can liver cancer drink medlar
Can early liver cancer be operated on
How long can you eat hot pot after liver cancer surgery
Can small liver cancer be treated with interventional therapy
How is the prognosis of liver cancer ascites
Can liver cancer eat peanut
What drug can liver cancer body hydrops use to drain
Can liver cancer metastasize lung cancer
Can hepatitis B be cured
Can liver cancer take target drug under what circumstance
Can lung metastasis of liver cancer be treated
Liver cancer, multiple abdominal lymph nodes, and ascites
What condition does intrahepatic cholangiocarcinoma later stage hematochezia
Can liver cancer eat tofu
Can liver cancer eat black rice
Can liver cancer patients eat ejiao after surgery
Can liver cancer eat gastrodia
Can liver cancer eat seafood
Liver cancer liver cirrhosis ascites infection
Hypoechoic or hyperechoic liver cancer
Can liver transplantation be done in advanced liver cancer
Is the liver cancer body itching worse
Liver cancer is cancer king can cure
Liver cancer liver ascites need to pump water
Lung cancer three itchy, liver cancer which three
Which tests can find liver cancer
Can early-stage liver cancer be operated on
Is ascites advanced cancer
How to deal with liver cancer ascites
Whether liver cancer ascites can use diuretic
Can liver cancer be treated with acupuncture
Can normal intestinal tumor markers rule out bowel cancer
Can liver cancer eat Huaishan
Can eat rhodiola prevent liver cancer and treat liver cancer
Can liver cancer patients eat pomegranate fruit
Liver cancer late can eat melon
Can liver cancer return to normal by itself
Will hepatitis die
Can get liver cancer cure itself
Can B liver have a fever
Liver cancer patient after operation, excuse me a few values are on the high side normal
Can the patient of liver cancer eat onion
Is the recurrence rate after primary liver cancer surgery high
Can liver cancer patients not eat rooster
Liver cancer can eat acid
Is the recurrence rate of liver cancer after operation high
Can liver cancer be jealous
Can fatty liver drink
Will liver cancer recur
How to return a responsibility is leucocyte decrease after liver cancer intervenes to treat
How is advanced liver cancer ascites pumped
Suffered from liver cancer, it is just checked out, can you do surgical treatment
Is liver cancer patient bubble water OK
Can liver cancer patients eat nuts
Liver cancer American ginseng can eat
Can liver cancer orange be eaten
Is liver ascites contagious
Can you eat pig liver after liver cancer surgery
Can liver cancer patients eat centipede
Can liver cancer patients eat ants
Can liver cancer test blood be checked out
What is diarrhea after liver cancer surgery to return a responsibility
Liver cancer cirrhosis ascites abdominal distension how to return a responsibility
Liver cancer ascites still can hold how long
Can liver cancer eat American ginseng
Does ovarian cancer turn liver
What food can liver cancer advanced liver ascites eat good
Can patients with diffuse liver cancer return to normal
Can bitter gourd treat liver cancer
Can liver ascites and liver cancer still be treated
Can liver cancer eat Ganoderma powder
Can liver cancer cold take medicine to eat
Alpha-fetoprotein test is H11029 for liver cancer
Is liver cancer liver ascites contagious
How does whole body itch return a responsibility
How does liver cancer add liver ascites in advanced stage do
Will primary liver cancer metastasize
Can severe fatty liver be cured
What to eat to kill liver cancer cells
How to care for complications after liver cancer surgery
Can liver transplantation be used in the early stage of intrahepatic cholangiocarcinoma
How long can you swim after liver cancer surgery
Can liver cancer eat fish what fish can eat good
Is liver cancer late liver ascites saved
Can primary liver cancer be treated nonoperatively
Can adenocarcinoma be cured
Can liver failure be cured
Will liver cancer recur after surgery
Can liver cancer eat honey
Can liver cancer patients eat Ganoderma
Is hiccup after liver cancer surgery late
Is rupture of liver cancer advanced
Is there ascites in the advanced stage of liver cancer
Primary liver cancer can live for several years
Is it good for cancer to eat sea cucumber
Whether liver cancer can be treated by interventional therapy after surgery
Can liver cancer eat mulberry yellow
Can late liver cancer use urine therapy
How to care for liver cancer ascites
Liver cancer can not be operated on such a situation can still live how long
How is liver cancer ascites abdominal pain treated
Whether colon cancer may metastasize into liver cancer
Do I need to take medicine after liver cancer surgery
Can nerve tumor be cured
Can liver cancer shine a light to cure cure
How to eliminate liver cancer ascites
Intrahepatic metastasis of liver cancer counts a few stages
Can liver cancer eat turmeric
Can advanced liver cancer be operated on
Can chronic liver cancer have a fever
What good can liver cancer late recombine season eat
Can ascites caused by liver cancer be pumped
Can liver cancer cause diarrhea
Does liver cancer appear bloody ascites
Small liver cancer can be treated without surgery can traditional Chinese medicine
Liver cancer advanced and have ascites what medicine should take to be able to treat
Spray door cancer postoperative recurrence, ascites, can traditional Chinese medicine treatment
Is advanced liver cancer liver ascites contagious
Can liver cancer saffron be eaten
Can liver cancer ejiao be eaten
How long can primary liver cancer recover after surgery
Can liver cancer and lung cancer be treated simultaneously
Can liver cancer be treated with a small amount of ascites
Can ascites in advanced liver cancer be eliminated
Can often drink coffee to prevent liver cancer
Can you drink milk after liver cancer surgery
Can liver cancer eat papaya
Can Virgo cure hepatitis B
Is the cancer vaccine real
Can abdominal ascites in advanced liver cancer be pumped
Will liver cancer have a fever
What thing can early liver cancer eat
Can liver cancer be cupped
Can liver cancer coffee be drunk
How long can be discharged after liver cancer interventional therapy
Can liver cancer eat tomatoes
How should liver cancer cause liver ascites to treat
Can liver cancer do biological immune therapy
Can liver cancer eat shrimp
Can B liver drink a small amount of beer
Can early liver cancer be treated only with drugs
Can liver cancer be transplanted
Can liver cancer be transplanted
Is it possible to cure liver cancer
What drug can liver cancer appear double lower limb edema take to detumescence
Can get liver cancer often angry
Can early detection of liver cancer really cure it
Can liver cancer blood test be detected
Is lung metastatic tumor cancer
Can liver cancer eat Coix rice
Can gastrointestinal bleeding be cancer
Can postoperative liver cancer patients regulate traditional Chinese medicine
Can liver fibrosis be cured
How long can 10cm liver cancer live
How long will liver cancer recur after surgery
Can liver cancer be inherited
Can liver cancer eat salty
Will the skin itch in the early symptoms of liver cancer
Can liver cancer relapse still be treated
Can liver cancer eat garlic
Can liver cancer eat raisins
Can be discharged after liver cancer intervenes to treat
What can advanced liver cancer spread eat
Can advanced liver cancer ascites be pumped
Can advanced liver cancer be sweat steamed
Right upper abdomen is stuffy, whether it may be liver cancer
Is Cancer Scary?
Can you drink after colon cancer surgery
What is cancer metastasis to the liver
Liver cancer patients can eat spirulina
Got liver ascites how to do, can cure
Did not pregnant HCG why rise
A plantar blood test was positive for CAH
What does terracotta stool indicate
How does stomach bloat dozen burp appetite bad do all the time
The carbohydrate antigen CA72-4 is high
Transaminases more than 200 must be hospitalized
How to choose between surgical operation and interventional treatment
My Ca153 is 9922 and the reference value is 0/35!
Newborn, failed cAH screening
Dull pain under the ribs in the right upper quadrant of the abdomen
At 36 weeks and 3 days of gestation, I would like to estimate the current weight of the fetus
What should be rechecked if ca19-9 and ca50 are high in the entry physical examination
Tumor marker carbohydrate antigen ca724 was examined for elevation, and gastrointestinal tests were done today
Will spider moles go away on their own
My 2 uncle's body is not good recently upper abdominal pain is good accompanied by evil
My carbohydrate antigen 72-4 test is 932,
How to do 36 weeks of pregnant diarrhea
How does damaged liver prevent deterioration
A dense little red spot on your wrist doesn't hurt, itch or stick out
Is glutamyltransferase 200 serious
Lymph nodes in the neck, stomach distention and numbness
AIDS life span
Is glutamyl transpeptidase 500U/L high serious
Is bone cancer the right word
A tumor in the adrenal gland and a recent pain in my back and stomach and vomiting
Carbohydrate antigen ca15-3 check how much
How to treat the pain in the ribs below the right chest
Is there a correlation between liver cancer urine and disease severity
Blood test showed high levels of CA153
How to distinguish haematemesis from hemoptysis
How to do to have induration on right neck sinew
Antinuclear antibody cutoff, ANCA cutoff, consult your doctor
Ask for a reply! The lover had an upset stomach a few days ago and had a bloody stool 10 days ago
Half A year after surgery and chemotherapy for stage IIIa lung adenocarcinoma, a small nodule was found on the other side
CA-153 breast cancer antigen was found to be relatively high (1793)
Taking Qingresanjie tablets, I was worried about the toxicity of Qianli light
At the age of 59, the examination result said that CA was more likely
Does grandma's mother inherit liver cancer
The carbohydrate antigen CA-125 was high
Report of tumor cell detection in peripheral blood
With elevated CA19-9, should we be alert to pancreatic cancer
The perinuclear pattern of antineutrophil cytoplasmic antibody was positive
Please see the test results for me. Thank you
What is the reason for the urine pregnancy test
What further tests should be done for high CA724 index
6. Is there a tumor on the liver on my father's CT
What department does the examination glutamyl transpeptidase hang
I had a kidney biopsy, and now the doctor has asked me to test for antinuclear antibodies, ANCA
Excuse me, does this result need to be operated on? Is it unmarried or childless
Gastrointestinal problems, suspected gastric bleeding, CA742 elevated to 2219
The carbohydrate antigen test showed an elevated CA153 of 2714
Can small three Yang turn negative
20 years old sometimes appear abdominal pain
Can hepatitis C be transmitted through saliva
White blood cells 225×10? Is /L dangerous
The carbohydrate antigen CA-125 was high in three breast cancer tests
Late liver cancer associated with resistance to spread to the lungs pelvis Ju duct calculi
Blood tumor markers ca153 worth 286 slightly tall it doesn't matter
Do you need an empty stomach for chylglycine
Is bladder squamous cell carcinoma contagious
How long should we take entecavir dispersible tablets in large three Yang anti-virus
What on Hcc medicine
Why PET-CT for suspected liver cancer metastasis
Where does spider nevus generally grow
What is the upper abdominal CT scan
The ca72-4 value was 15684, and he had no discomfort symptoms
The CAP value 306E value 44
Dad's ca724 is high. Is this serious
Check CA19-9 hang what department
Depression accompanied by schizophrenia
How is hepatitis C screened
What sites are examined by MRI
May I ask what this blood test result is called elevated CA72-4
The simplest method for small three Yang to turn negative
I did hepatitis B test to let the doctor give me to see
How does PETCT differentiate between benign and malignant tumors or lesions
Can Grandma's liver cancer be inherited from Mom
Cause of dull pain in the right upper abdomen
Duodenal ca metastatic pulmonary ca, copd
Well-differentiated squamous cell Ca,
Can Grandpa's liver cancer be passed on to his grandson
A physical examination found a high level of CA724
Is cirrhosis 53 enough to live to 80
Irregular menstruation, pale white discharge from both breasts after the period
Three indicators of C1A screening were high, especially CA71-4
What can chest spiral CT detect
Is transaminase 100 or so serious
The tongue base is bitter in the morning, the tongue is bitter when you get up, and alanine aminotransferase is higher than normal value
The left leg has been like this for 20 days without too much pain
567 for carcinoembryonic antigen and high for carbohydrate antigen ca72-4
ca72494, is there any serious condition
Endoscopic diagnosis: rectal ca, pathology has not come out, is this serious
Liver cancer 45CM*4CM*45CM is early or middle stage
Elderly patients with advanced Ca had emaciation and anemia for 6 months and hallucinations for 15 days
A month of sudden weight loss 20 kg carbohydrate antigen is high
Family old man 65 years old liver cancer spread to the bile duct
Is alanine aminotransferase 65 high
What about CA724 elevated to 97
Rock bath glycosidase 64. What's going on
I feel a foreign body in my throat. Accompanied by a cough,
Other people's spit spit to my wound can infect what disease
32 weeks pregnant, hit a hard object on my right hipbone above
When is a quantitative HCV RNA test positive
A: I recently had an upset stomach and then began to have blood in my stool 10 days ago
Metastatic liver cancer. Knowing that there is no hope for cure, I hope for a prescription to relieve the pain. Thank you
Is MRI accurate in detecting tumors
Anca-associated vasculitis
Two years earlier, he had undergone radical hysterectomy
How should small three Yang test sheet see
ANCA vasculitis nephritis can play new coronavirus vaccine
What is the normal reference value of alpha-fetoprotein
What is serum alpha-fetoprotein
What is the normal range for alpha-fetoprotein
How much is high is alpha-fetoprotein
How much alpha-fetoprotein is liver cancer
What is the normal range for alpha-fetoprotein
What is the reference value for alpha-fetoprotein
What disease is alpha-fetoprotein on the high side
How much high alpha-fetoprotein is liver cancer
Alpha-fetoprotein is on the high side
What is the reference value of alpha-fetoprotein in liver cancer
Alpha-fetoprotein is high.
High alpha-fetoprotein is liver cancer
Is alpha-fetoprotein 18 liver cancer
What is the reference value for high AFP
Normal values for alpha-fetoprotein
What is alpha-fetoprotein positive
What to do with high alpha-fetoprotein
The normal range for alpha-fetoprotein
What is the normal value of AFP in liver cancer
Alpha-fetoprotein index is more or less normal
Liver cancer A mussel protein is how much
The alpha fetoprotein of liver cancer is generally how much
What is hepatitis B alpha fetoprotein
Have liver cancer patient at home excuse me next doctor this check result what meaning
Can the initial stage of liver cancer be examined by color Doppler ultrasound
Can repeatedly boiling water cause cancer
Can the new coronavirus vaccine be hit after liver cancer surgery
What is it that liver cancer is detected without symptoms at ordinary times
Liver cirrhosis liver cancer at the same time emphysema serious
How to keep liver cancer away from you
Why do young people get liver cancer
Does alcohol make liver cancer worse
Can SBRT be performed for liver cancer
Liver cancer advanced leg does not have strength how to do
How does a month after liver cancer operation do all the time abdominal distension
My grandpa anterior segment check is liver cancer, yesterday went to the toilet to pull a lot of excuse me how to return a responsibility
Can you eat Huaier after liver cancer interventional operation
Can liver cancer jaundice emphysema be operated on
Got liver cancer how should deal with
Can liver cancer have emphysema to operate under general anesthesia
Can autoimmune hepatitis be repeated
A new lesion was found in his father after resection of small hepatocellular carcinoma
Is the given diagnosis determined as advanced liver cancer and how should it be treated
Patients with advanced liver cancer have persistent fever and poor appetite
Metastatic stage of liver cancer. It's also found in the lungs.
Can Dad liver cancer be inherited
Invigorating spleen and dispelling phlegm against liver cancer
Will man's liver cancer be inherited to the next generation
Female right leg knee pain is liver cancer
Can long-term loose bowels cause cancer
How to supplement nutrition in advanced liver cancer
How should the elderly with liver cancer treat a cold
What physical conditions are required for early resection of liver cancer
Can soluble dietary fiber induce cancer
Liver cancer was reexamined two and a half months after radiofrequency ablation
Can liver cancer be seen by B-ultrasound
Only do ct look is liver cancer, must be liver cancer
Is the rupture of liver cancer serious
Will liver cancer shine again before it dies
b ultrasound how to show early liver cancer
The examination results of liver cancer one and a half years after operation to help see whether there is deterioration.
My father has had liver cancer for six years, and now it is cancerous and has spread to the whole body.
Report of reexamination 4 months after liver cancer operation
Have the doctor that can see liver cancer help me to solve confusion
Uncle has liver cancer metastasis, but also suitable for liver transplantation
My husband got advanced liver cancer, how should I do
2. What is the price of replacing norfovir
Can liver cancer surgery cause ascites after a month
When can the COVID-19 vaccine be given after liver cancer surgery
It has been half a year since the liver cancer intervention. He has had a fever in the liver
How should liver cancer adjust after radiotherapy to fill to do
The reexamination results of my father's liver cancer after operation.
Can liver cancer be passed on to the next generation
After liver cancer surgery, the nose is red for nearly two months, which is the reason
Can b ultrasound be done for advanced liver cancer
What are the CT/MRI findings of small hepatocellular carcinoma and DN nodules in the early stage of canceration
The components of this diet tea drink too much will get liver cancer
How should liver cancer recur deal with
Can CyberKnife treat liver cancer that has metastasised
Are sunflower seeds a carcinogen
Friend father liver cancer existing ascites can cure good
Ascites and pleural effusion occurred after interventional surgery for advanced hepatocellular carcinoma
The optimal timing of operation for liver cancer
You can get liver cancer from smoking, drinking too much, drinking contaminated water
Can liver cancer color ultrasound see it
One and a half years after surgery for early-stage liver cancer
Intrahepatic cholangiocarcinoma appears jaundice is advanced
Early liver cancer has been resected need to do intervention and take rake to drug
Esophageal cancer metastatic liver cancer vomit how to return a responsibility to speak inclearly
Can liver cancer not eat to go to meal to be improved after interventional therapy
Is Apatinib effective for liver cancer
A dull pain in the right upper quadrant is liver cancer
Liver cancer, portal hypertension, bilateral vascular cancer emboli
Imaging features of primary liver cancer
The patient could be discharged after a few days of radiofrequency ablation
What preparation is required for liver cancer surgery
Will pleural effusion appear in liver cancer
Early liver cancer, can from some small changes in the body
Can early liver cancer be cured by high radiofrequency therapy
Is the precursor of cancer frequent cold
Does liver cancer affect sleep
Does selenium deficiency cause liver cancer
Do overnight dishes really cause cancer
How to deal with recurrence of liver cancer after surgery
B liver carries the influence to the body big
Got C liver can cause liver cancer
Went to the hospital to do the examination, the current result is possible liver cancer
Postoperative liver cancer, lung metastasis, bone destruction of the coccyx
Can liver cancer be detected by color Doppler ultrasound
10 days after liver cancer ablation surgery, the fever has been low for 18 days
After making ct enhancement, are liver cancer and hepatic cyst both easy to judge
Can husband liver cancer cocoon infect
This kind of diet tea drink much can get liver cancer
Went to do CT yesterday, the result shows liver cancer, still have treatment
I have advanced liver cancer, what to do
Liver cancer advanced liver ascites blurred vision return urine yellow how to do
Is there no recurrence of liver cancer after operation for 5 years to mean nothing
Advanced lung cancer turned liver on, do camel snail knife good
Can alcohol liver heal itself without drinking
A year and two months after liver cancer transplant
Can liver cancer be transmitted directly to family members
Can you get cancer if your immunity is low
Do advanced liver cancer do interventional therapy more times can more aggravate the condition
How to deal with ascites after liver cancer resection and recuperation at home
The fourth chemotherapy has ended for a while, and now I have some dizziness during the liver protection treatment
After liver cancer surgery, I am taking targeted drug sorafenib, and I have eczema on both sides of the anus
A friend of mine says he has liver cancer, doctor
These conditions are a precursor to cancer
Liver cancer in the advanced stage of abdominal water serious
Can early liver cancer be detected by B ultrasound
Because grandma is liver cancer died, want to check below B liver 5
From the beginning of long tumor how long will turn into liver cancer
I did liver cancer operation more than a year what to eat to compare health care
The old father liver cancer late jaundice, low appetite, itchy skin, yellow urine
Can advanced liver cancer ascites lead to death
Will a liver cancer vaccine be available by 2020
Recently lumbago to check, accidentally found a liver cancer cyst, do not know good treatment
Liver cancer has three months after surgery, look at the face yellow
Color ultrasonographic picture is as follows is the probability of liver cancer big excuse me
Can father-in-law liver cancer infect children
Does liver cancer need surgery early
Can obesity cause liver cancer
Can diffuse liver cancer in the right lobe of the liver be contagious
Do patients with liver cancer also have mental problems
Can a father who dies of liver cancer be passed on to his children
What is the reason for the well-defined hypoechoic nodules
Please ask the doctor to help see if this is liver cancer
Why does not smoking also cause liver cancer
What clinical manifestations will appear in the early stage of liver cancer
Can liver cancer cause pus in the abdominal cavity
B ultrasound can detect early liver cancer '
Does liver cancer pumping require hospitalization
Liver cancer has been operated on in the middle stage.
Can liver cancer cause pleural effusion
Small three Yang can transform liver cancer
Can liver cancer intubation drainage tube be pulled out
Jaundice, sometimes pain in the liver area, for several years
Surgical effect of microwave ablation of liver cancer
Whether parents with liver cancer will be inherited to their offspring
Liver cancer for a year has been resistant to specific drugs
Stomach and waist had been painful, considered gastric cancer
Is there a risk in the treatment of liver cancer with iodine-125 particles
Will liver cancer embolization be done in one session
What is the reason for no recurrence of liver cancer three years after operation but general discomfort
How to do if liver cancer is found after gamma knife surgery
Patients do liver cancer interventional surgery, come back home for a week, feeling not strong
Is loach helpful for liver cancer
Does diabetes also cause liver cancer
How long to stay in bed after open abdominal surgery
Can b ultrasound detect early liver cancer
Can liver cancer emphysema reduce fat
Massive liver cancer in right lobe of liver and multiple sub-foci in liver
Advanced stage of liver cancer, has spread, now Beijing 382
Why is the pain more and more serious in the late stage of liver cancer
Vaccinate B liver vaccine to produce antibody certainly
Is fatty liver infiltrative disease serious
Is all the chest pain breast hyperplasia
B HCC embryonic antigen and carbohydrate antigen 199
Does liver cancer cause tongue curvature
Liver cancer is inherited in sons or daughters
Can liver cancer be transmitted to others
Father-in-law liver cancer can infect the baby
Liver cancer, half a year after intervention, today did MRI excuse me
Where is the liver cancer right shoulder pain specific location
Liver cancer is advanced now to loose stomach how to do afternoon fever
Can you eat Amli Nutri lai product after liver cancer surgery
After the liver cancer interventional surgery (more than 20 days), the patient always felt uncomfortable in the stomach
What tests should be done for early diagnosis of liver cancer
Liver cancer cerebral hemorrhage coma 10 days how to do
Three days before the death of advanced liver cancer symptoms
How does right liver place ache faintly return a responsibility
Can get alcohol liver certainly become liver cancer
Three years after breast cancer surgery, he was suspected of liver cancer
Can liver cancer be found in time when examined by color Doppler ultrasound
Is liver cancer diagnosed at the time of examination
Can take entecavir get liver cancer
What is the occasional stabbing pain in the liver area for a second or two to return a responsibility
Do you feel weak in the late stage of liver cancer
When is the second time after the first liver cancer intervention
A nodule was found one month after resection of the small liver cancer
Why does the body temperature drop in the advanced stage of liver cancer
Liver cancer to do intervention generally do a few times
How to find out that liver cancer has spread
How to tell if you have liver cancer
Is the effect of liver cancer combined with portal vein tumor thrombus good
My father is liver cancer, how to regulate the body deficiency after three interventions
Advanced liver cancer is now liver coma can be maintained for a few days
Liver cancer abdominal distension rapid exhaust method
How is liver cancer graded according to pathology
The time for newborn to be vaccinated against hepatitis B
What does the doctor trouble help me to see this examination item mean is liver cancer
Why are early signs of liver cancer overlooked
Is it true that eating sunflower seeds causes cancer
How often should you get a checkup to prevent liver cancer
Can smoking and drinking get liver cancer
Get alcohol liver to eat moldy food
Liver cancer ascites stomach more and more big still can hold how long
My dad liver cancer in the middle of the operation, will it recrudescence
Why can appear the part of liver uncomfortable
Hello doctor, my husband's father died of liver cancer
Can liver cancer cause headache and dizziness
How long does liver cancer embolization surgery take
How to maintain a good attitude in the face of liver cancer
Can you eat bird's nest with ganoderma lucidum and propolis every day after liver cancer surgery
Liver cancer rupture is easy to transfer what position
Why should check liver cancer take chest X-ray
Will liver cancer certainly lose appetite
Will early liver cancer recur after surgical resection
Contrast-enhanced ultrasound features of liver cancer
Jaundice hepatitis into liver cancer will not be infectious
Is the jaundice caused by liver cancer contagious
How to do vomit after liver cancer intervenes surgery
Liver cancer targeted drug sorafenib how much is a box
Want to know about liver cancer can be inherited
Can drinking cause this liver cancer
Is liver cancer inherited? Will liver cancer be passed on to children
Liver cancer do b ultrasound can see out
Can liver cancer eat black fungus and mushroom
Can second liver affect life span
Is the blame that the abdominal pain of unknown reason diarrhea all food provoks
6. My father was diagnosed with early-stage liver cancer
How does cancer cells of lung cancer of advanced stage spread to liver do
Does mother liver cancer inherit the next generation
Can you drink Yuan fish soup after liver cancer pumping ascites
Can aflatoxin cause cancer
Analyze the pathology report of liver cancer surgery!
Will FNH heal by itself
Is there a relationship between the usual eating habits and liver cancer
Liver cancer do gamma knife cancer cells can spread
Friend liver cancer surgery for one year, male, 40
What is the tumor operation of liver resected according to
Stomach bloating belching appetite is bad, sometimes good and sometimes bad, how to return a responsibility
Liver cancer b ultrasound can see out
Excuse me doctor, drank wine sometimes liver area feel ache, eye is dry, can be
Does sorafenib have effect to liver cancer excuse me
Can grandpa liver cancer be inherited
My aunt got liver cancer now, very painful at present, how should do
Will the family history of liver cancer inherit the next generation
Annual physical examination will find early liver cirrhosis
Knee pain one year after liver cancer surgery
What about sorafenib-related diarrhea after liver transplantation for liver cancer
Could you tell me more about the types and symptoms of liver cancer
Can liver damage caused by long-term medication lead to liver cancer
b ultrasound can detect early liver cancer
What are the high-risk groups of liver cancer ascites
What are the types of commonly used tumor markers
What are the symptoms of hepatic lipoma
What tumor markers are found in liver cancer
What tests are available for metastatic liver cancer
What targeted drugs are available for liver cancer
The difference between large and small liver cancer
What are the side effects of radiotherapy for liver cancer
What are the antibodies after liver cancer surgery
How to divide liver hemangioma and liver cancer
What are the indicators of liver cancer
What are the differences between liver hemangioma and liver cancer
C liver common sense has what
What are the manifestations of hepatic encephalopathy
What is the classification of liver cancer
B liver A liver C liver which serious
What are the types of liver cancer
What are the screening methods for liver cancer
What are the chemotherapy methods for liver cancer
What precautions should be taken in daily life of patients with liver cancer
What are the screening methods for colorectal cancer
What are the surgical methods for liver cancer
What are the conservative treatment methods for liver cancer in cirrhosis
Hazards of advanced liver cancer
What is the diagnosis of liver cancer
What are the high-risk groups of liver cancer
Who needs radiotherapy for liver cancer
What are the symptoms of metastatic liver cancer
What are the hazards of hepatitis C
What is the bad treatment method of liver detox
What is the difference between liver cancer and liver cyst
What are the hazards of advanced liver cancer
What are the causes of cancer
The survival rate of liver cancer surgery
Pain characteristics in the early stage of liver cancer
What are the surgical methods for liver cancer
What are the diet treatments for cancer
What are the risk factors of liver cancer
What are the treatment methods of liver cancer in each period
What are the dietary principles for patients with liver cancer
What are the hazards of hepatitis
Liver tumor minimally invasive treatment methods have what
What are the high-risk factors of liver cancer
What are the pathological types of primary liver cancer
What is the food that treats liver cancer
How is liver cancer graded
What are the symptoms of liver cancer metastasis
What are the manifestations of liver cancer
What are the signs of liver cancer
What are the Chinese herbs that relieve pain and fight cancer
What are the methods of anti-tumor
What are the methods of local ablation treatment for liver cancer
Differences between hepatic hemangioma and hepatocellular carcinoma
Who is at high risk for liver cancer
What are the categories of liver cancer
Do gradually elevated liver and gallbladder proteins cause liver cancer
What are the conservative treatments for liver cancer
What are the manifestations of hepatomegaly
What are the types of primary liver cancer
What are the targeted drugs for liver cancer
What are the high-risk groups of liver cancer
What are the causes of liver cancer
What are the types of tumors
What are the surgical treatments for primary liver cancer
What is the harm of hepatitis B virus infection
What are the hazards of regular drinking
Liver tests report alpha-fetoprotein 1475
What causes liver cancer
What are the precautions for patients with liver cancer
What are the symptoms of liver cancer after interventional therapy
Suitable for liver cancer patients with medicinal diet has what
What are the causes of fever in patients with liver cancer
What is the diagnosis of liver cancer
A hepatitis B hepatitis C which serious
Which liver cancer patients are suitable for surgical treatment
Which is serious, hepatitis or liver cancer
What are the recommendations of traditional Chinese medicine for liver cancer
What are the high-risk groups of liver cancer
Hepatitis B cirrhosis develops to liver cancer
Treatment options for liver cancer
What are the ways to pick up and measure liver cancer
What is the basic common sense of liver cancer
What is the difference between hepatitis B and hepatitis
Liver cancer pain to eat which traditional Chinese medicine can relieve pain
What are the characteristics of primary liver cancer pain
What are the high risk factors of liver cancer
What are the high-risk groups of liver cancer
What is the diet of liver cancer patient
What are the early diagnostic methods of liver cancer
What are the methods of diagnosing liver cancer
What are the symptoms of liver cancer, what needs to be noted
What are the pathological types of liver cancer
The difference between liver cirrhosis and liver cancer
What are the side effects of chemotherapy for liver cancer
What are the characteristics of liver cancer tongue coating
What are the dietetic methods of anemia
The difference between metastatic liver cancer and primary liver cancer
What does hepatic interventional therapy mean
What are the causes of liver cancer
What are the high risk factors of primary liver cancer
What are the misunderstandings in the treatment of primary liver cancer
What are the causes of postoperative recurrence of liver cancer
Differential diagnosis between hepatic hemangioma and hepatocellular carcinoma
What are hepatobiliary and pancreatic tumors
Differential diagnosis between hepatic hemangioma and hepatic carcinoma
What are the staging and diagnostic methods of liver cancer
What are the causes of high gamma globulin
What foods should be eaten more to prevent liver cancer
What are the factors that induce liver cancer
What are the symptoms of liver cancer, what needs to be noted
What are the ways of metastatic cancer of liver cancer
What are the examination methods of liver cirrhosis
What are the ways of radiotherapy for liver cancer
What are the high-risk groups of liver cancer
What are the principles of dietary treatment for liver cancer
Liver cancer to do what examination
What are the TCM classification of liver cancer
What is the difference between liver cancer and hilar carcinoma
The difference between hepatic hemangioma and liver cancer
What is the food that hurts liver
What does liver cancer eat commonly have
What is the drug treatment of hepatitis C
What are the side effects of liver cancer chemotherapy
What are the common drugs for liver cancer (Part 2)
What are the pathological types of liver sarcoma
What are the complications of liver cancer
What are the common postoperative complications of liver cancer
What are the types of liver cancer
How is liver cancer caused
What are the manifestations of liver palm
What are the sequelae after liver cancer surgery
Does liver cancer die quickly
What are the ways of treating liver cancer in China
What are the new drugs for the treatment of hepatocellular carcinoma
What are the early signs of liver cancer
What are the symptoms of liver cancer
What is the classification of liver cancer in traditional Chinese medicine
What are the risk factors of liver cancer
What are the causes of liver cancer
What are the causes of fever
Which liver cancers need radiation therapy
What are the hazards of fatty liver
The way liver cancer metastasises
What are the symptoms and manifestations of liver cancer
What are the targeted drugs for liver cancer
What are the types of primary liver cancer
Who is susceptible to liver cancer
What are the causes of liver cancer
What are the causes of liver cancer
Who is more likely to develop liver cancer
What are the common misunderstandings in the treatment of liver cancer
How liver cancer spreads
What are the hazards of high white blood cells
The recipe that suits liver cancer patient to eat has what
Types of targeted drugs for liver cancer
What are the hazards of hepatitis B drinking
What is the difference between large liver cancer and small liver cancer
Liver cancer surgery is about how much
What is the classification of primary liver cancer
What are the types of liver cancer at present
What are the manifestations of liver cancer patients
What are the side effects of interventional therapy for liver cancer
Differential diagnosis of Liver cancer
Foods you can't eat for liver cancer
What is the method of protecting liver to prevent tumor
What are the new technologies for liver cancer treatment
What are the hazards of chronic hepatitis B
What is the difference between hepatitis and liver cancer
What are the specific drugs for esophageal cancer
What is the killer of liver cancer
What are the biological targeted drugs for liver cancer
What good method does protein decrease have after liver cancer surgery
Differential diagnosis of liver cancer and hepatic hemangioma
What are the poorly differentiated ways of liver cancer
What are the causes of recurrence of liver cancer
What are the local ablation treatment methods for liver cancer
What are the differences between liver tumors and liver cancer
What are the ways of physical examination to prevent liver cancer
What are the diet therapies for liver cancer
What are the side effects of radiotherapy for liver cancer
What are the precautions of patients with chronic hepatitis
What are the drugs of interventional therapy for liver cancer
What are the symptoms of intrahepatic cholangiocarcinoma
Which liver cancer patients need chemotherapy
What to look out for in liver cancer
What are the pathological types of liver cancer
What is the high-risk population of metastatic liver cancer
Life precautions of liver cancer
What are complications of liver cancer
What are the high-risk groups of liver cancer
What are the surgical risks of liver cancer
What are the characteristics of microwave ablation in the treatment of liver cancer
What are the effective treatment methods for liver cancer
What is the operation method of liver cancer
What are the precautions of liver cancer
Which cancers are useful for hyperthermia
What are the causes of liver cancer vomiting
What should pay attention to liver cancer
Prognosis of liver cancer after interventional surgery
What foods should patients with liver cancer eat more
What are the treatment methods after liver cancer is diagnosed
Differences between hepatitis and liver cancer
What are the key points of treatment for post-hepatitis cirrhosis
What is the difference between liver cirrhosis and liver cancer
What are the causes of advanced foot swelling of liver cancer
What are the effective means of treatment for liver cancer
What are the liver cancer departments
Is liver cancer radiation useful
What are the predisposing factors of liver cancer
What are the nursing problems of liver cancer
Where does liver cancer hurt?
What are the high-risk groups of small liver cancer
What are the treatment misunderstandings of liver cancer
What are the common drugs for liver cancer (Part 1)
Splenomegaly, hemoglobin 177, normal liver function
What are the differences between hepatic adenocarcinoma and liver cancer
What are the causes of liver cancer
What are the foods to prevent liver cancer
The difference between liver cancer and cirrhosis
What are the routes of liver cancer metastasis
What is the control method of pain in advanced liver cancer
What are the reactions after interventional treatment of liver cancer
What are the sources of liver cancer
What are the preventive examinations for liver cancer
What is the difference between hepatic hemangioma and liver cancer
Got liver cancer to have what good food therapy method
Oxaliplatin chemotherapy what cancer
How does intrahepatic cholangiocarcinoma produce lymphatic metastasis treat
How is big three Yang transformed into small liver cancer to treat
What does liver cancer patient reexamine need to check
How does the man's chest big treat
What are the cancer susceptible groups
How to treat metastasis after liver cancer surgery
Why does advanced liver cancer defecate impassable how should treat
How does advanced liver cancer relapse need to be treated
How does the patient with advanced liver cancer vomit all the time
How is bilirubin metabolism abnormal treated
The mother had liver cancer, and the physical examination found a tumor
How does traditional Chinese medicine treat hepatitis C
Liver cancer metastatic adrenal gland and how to treat blood vessels
How to treat liver cancer if there is giant tumor on the liver
How to treat cancer patients effectively
How to treat advanced liver cancer and spread
How should late rupture of liver cancer be treated
How does liver cancer cell spread treat
The cost of treating liver cancer in large hospitals
How is lymphatic tuberculosis and liver cancer treated
How to treat vascular atherosclerosis performance
Cinobufagin to what cancer treatment effect is good
Lung metastasis of advanced liver cancer ascites! How should treat method is good
Digestive tract early cancer screening check what
How to do with advanced primary liver cancer and metastasis
Can eating loach treat advanced liver cancer
How should excuse me liver cancer advanced patient treat
How is the therapeutic effect of tumor ablation
Is microwave ablation of tumors good
Tumor MDT treatment
What tests should be done for liver cancer
Excuse me liver cancer late can cure right head so
How should the patient of advanced liver cancer not open a knife to treat
Got liver cancer how should go to treat
The most serious complications of liver cancer
How to do liver tests
How to cure pubic lice
How does liver cancer late need to be treated to need to notice what
Liver cancer screening to do what examination
Can liver cancer eat mushrooms
How should advanced liver cancer be treated and saved
How is the person of liver cancer late painful ground called all the time to treat
How should advanced liver cancer be treated excuse me
Eat entecavir how to get liver cancer treatment
How much is the dose of butyl poison beans to treat liver cancer
How about the effect of hepatic arterial chemoembolization in the treatment of liver cancer
Is cancer of type o blood easy to cure
How to review patients with brain metastases after treatment
What should be checked in liver cirrhosis reexamination
How is liver disease treated by correct diet
Liver cancer interventional therapy how to do what is TACE
Liver cancer leg acid how to eliminate
How to check to have liver cancer
How should liver cancer bone metastasis be treated
What can liver cancer do to check out
Patients with advanced liver cancer have a fever of 40 degrees how to do
Will it recur after liver transplantation
What does liver cancer reexamination need to check
How is child infected B liver virus unfortunately treated
Check for cancer to do what examination
What is the right test for liver cancer
What examination is needed for liver cancer
What is the difference between vascular interventional therapy and systemic chemotherapy for liver cancer
Can liver cancer be treated with Shenghong therapeutic apparatus
How does liver cancer have jaundice again to treat
How is small three Yang treated
How does the diffuse liver cancer need to be treated excuse me
Got liver cancer how should I treat
Liver cancer portal vein cancer embolus, can traditional Chinese medicine treat
How to treat liver cancer combined with portal vein tumor thrombus
What does blood infection mean
How does suspicion get liver cancer to treat
How is nodule treated best
What is intensity-modulated radiation therapy
How is the diagnosis of liver metastases different from the treatment of primary liver cancer
How to treat liver cancer in the late stage of abdominal enlargement and hardening
How is advanced liver cancer metastasize to lung cancer treated
How to correctly understand the standard of liver transplantation for liver cancer
How does liver cancer need to be treated
How does toad skin cooperate Chinese herbal medicine eat ability treat liver cancer
How should tumour check
What is the difference between the treatment of Chinese and western medicine for liver cancer
How does liver cancer minimally invasive surgery do
What does liver cancer chemoradiotherapy need to pay attention to
Why is liver cancer called the king of cancer
How should massive type liver cancer late be treated
How should liver cancer method be able to treat just good
What is serum total bilirubin
How should liver cancer be able to cure completely
Second liver big small when is 3 Yang treated
How does lung cancer liver cancer metastasize to bone metastasize late
How should nasopharyngeal carcinoma liver metastasis be treated
How to treat early liver cancer excuse me
What cancer is targeted therapy most effective
What is portal vein embolization for liver cancer
What should patients with advanced liver cancer pay attention to when they eat Dolomite
What is the effect of antiviral therapy on liver tumor formation and recurrence of liver cancer
What about liver cancer patients who cannot tolerate chemotherapy
How to treat liver cancer advanced pancreatic lymphoma
How should liver cancer do to ability cure
Liver cancer, how to treat already painful at present
How is jaundice treated
How does advanced liver cancer have diabetes again for many years
I want to excuse me, how should liver cancer be treated
Is advanced liver cancer necessary to have chemotherapy
Liver cancer patients appear pain how to do
How does radiofrequency ablation treat liver tumors
How to treat advanced liver cancer combined with hernia
Excuse me, is this diffuse liver cancer how to treat advanced stage
What stage does 6cm liver cancer belong to
How does liver cancer have jaundice again to treat
How should be treated after advanced cancer cell spread of liver cancer
Does the old man have liver cancer meet heredity
What drug should liver cancer medium-term interventional therapy take twice
Can liver cancer chemotherapy fall hair
What preparation should be done before liver cancer interventional therapy
How to treat hematemesis
How to treat chemotherapy
? How to treat small nodules on the liver
What good curative effect does advanced liver of lung cancer, bone metastasis have
How to get liver cancer to treat excuse me
How does liver cancer metastasize to lung treat
How should advanced liver cancer be treated
How is alcoholic fatty liver checked
How much is a liver transplant
Is targeted therapy still useful for lung cancer metastatic liver cancer
How to maintain the patients with early liver cancer
Does radiofrequency ablation have sequelae in the treatment of liver cancer
What examination can do to diagnose is cancer
Liver cancer chemotherapy (early) how to treat
How can ability check gives liver cancer
How should liver cancer metastasize to lung to treat
How is liver malignant tumor minimally invasive treatment
How does liver cancer have jaundice again to treat
Must metastatic liver cancer be treated surgically
How does liver cancer form
How is hemochromatosis checked
How is bilirubin on the high side treated
What cancer can infect a person
Got liver cancer how should treat
How is metastatic adrenal gland of liver cancer advanced treated
How does advanced esophageal cancer metastasize into liver cancer infect treat
What does the patient with liver cancer need to notice excuse me
How is jaundice high treated
Can liver cancer bone metastasis still be treated
How to judge the treatment of primary liver cancer and metastatic liver cancer is different
How to treat hepatocellular carcinoma with portal vein tumor thrombus
How does stomach ache after liver cancer radiotherapy want to treat
How does want to vomit after meal treat
What does smoking have to do with liver cancer
Who is easy to get liver cancer
How does liver cancer late symptom puncture treat
What is tumor perfusion chemotherapy and embolization therapy
How is portal vein tumor thrombus formed and treated in primary liver cancer
How to treat lung metastasis of liver cancer
What are the advantages of radiofrequency ablation in the treatment of liver cancer
How should liver cancer combined with portal hypertension be treated
Complications of microwave ablation in the treatment of liver cancer
What can liver cancer patients eat to supplement the spirit
How should advanced diffuse liver cancer be treated
How to treat liver cancer with portal vein tumor thrombus for 5 years
Why does liver cancer need comprehensive treatment
How does father get liver cancer to treat
How is uric acid low treated
How does liver cancer bone ache
How does liver surface rough treat
How does liver cancer patient abdomen and leg swelling do
How to early detection of liver cancer treatment need radiotherapy and chemotherapy
What does liver cancer have to do with yogurt
How is hepatitis small 3 Yang treated
How is liver damage treated
What treatment effect will be good after liver cancer operation
How is metastatic liver cancer diagnosed
What is the effect of hedyotis diffusa on patients with advanced liver cancer
What is the effect of argon nuclear knife on liver cancer
What item does liver cancer check
Can liver cancer recurrence be treated with biological immunotherapy
Is blood screening for cancer useful
How is liver abscess checked
How does liver cancer get up vomit to treat
How to treat intracranial metastatic tumor
How is nccn liver cancer treated
How does liver cancer advanced hemoptysis do
Why does liver cancer late meet hypertension
What are the symptoms of advanced liver cancer before death
What is the symptom of melena
What does cancer shoulder pain look like
Liver cancer advanced liver coma how to do
Why is the abdomen big in advanced liver cancer
What is the cause of vomit in late liver cancer
How does late liver cancer finally die
What is the best period of surgical treatment of liver cancer
Liver cancer or cirrhosis how to judge
What should liver cancer late eat
What method does just finish liver cancer tumour excision have to treat
10 What is non-fatal cancer
What are the symptoms of tummy growth
How is the course of chemotherapy
What is the symptom before the death of the patient with advanced liver cancer
Liver cirrhosis advanced liver cancer advanced how to do
What is the explanation of cancer in Chinese medicine
How to be sure it is not liver cancer
Why conservative treatment for advanced liver cancer
What medicine does liver cancer tongue pain take in advanced stage
What kind of liver cancer can't do surgery
How long is the natural history of liver cancer
What are the symptoms of advanced tumors in the digestive tract
How does liver space-occupying change disease treat
What are the early symptoms and precursors of liver cancer
What are the symptoms of dying patients with liver cancer
What are the 6 most common early symptoms of liver cancer
How does hepatic artery embolization of liver cancer chemotherapy
What milk powder is suitable to drink in advanced stage of liver cancer
What is the reason of late liver cancer jaundice eye yellow
How does liver cancer patient cold do
Right rib pain is liver cancer
How is secondary liver cancer diagnosed
What reason does tumor three normal get cancer however
What is the imaging manifestation of liver cancer
What are the symptoms of liver cancer in the last week before death
What food should liver cancer late eat
Is biological immunotherapy useful for liver cancer
What about hematuria in advanced liver cancer
What disease is whole body dropsy
How is late liver cancer recurrent fever to return a responsibility
What is the cause of abdominal pain in advanced liver cancer
What does hemoptysis mean in advanced stage of liver cancer
What nutritive product does liver cancer patient eat
AFP value exceeds the normal value, whether it is liver cancer
What is good for constipation in advanced stage of liver cancer
What easy to get liver cancer
How does liver cancer late hemorrhage do
How to do in the advanced stage of primary liver cancer
How is liver occupying lesion treated
Is there no cancer if tumor markers are normal
Liver cancer patients at home, what to eat at ordinary times
What is the adverse reaction after primary liver cancer chemotherapy
What symptom does disease have on liver
Why is the spirit of liver cancer advanced still very good
Liver cancer late pain how to do
What is the staging standard of liver cancer
What symptom is female liver cancer prephase
Hiccups in the late stage of liver cancer
What is anatomical hepatectomy
How is primary liver cancer diagnosed
Why can drink alcohol get liver cancer
How to prevent liver cancer rupture and hemorrhage
How to do more than 30 years old liver cancer late
Can cancer patients drink alcohol
Liver cancer metastasis lung cancer fever what reason is headache
Why does late liver cancer develop so fast
What dish can liver cancer eat relieve
What is the cause of the red dot of the whole body before the death of advanced cancer
Liver cancer advanced liver ascites foot swelling how to do
How to eliminate liver cancer cells
What are the early symptoms of liver cancer? What does the early symptom map look like
What is the role of rubeseed
What kind of pain in the right shoulder is cancer
How does liver cancer swell belly do
What method does advanced liver cancer patient face turn yellow to have
What is liver cancer return visit time
Diarrheal liver cancer how to eliminate
What symptom is liver cancer at ordinary times
What symptom is female liver cancer late how to treat
Why is scrotum swollen in advanced stage of liver cancer
What is liver cancer death process
What kind of person is easy to get liver cancer
What performance does liver palm have
What is the signal of early liver cancer
What soup can you drink after liver cancer surgery
What symptom can liver cancer appear
What are the symptoms 10 days before liver cancer death
Why does liver cancer late ache
Liver cancer emphysema spleen is advanced
What does late liver cancer fever indicate
What symptom does liver cancer have excuse me
How does liver cancer late liver area pain do
What symptom does ascites have
After advanced liver cancer chemotherapy, the liver part is more painful, is chemotherapy useless
What is the symptom two days before liver cirrhosis dies
How does the patient of liver cancer of advanced stage pain do
What are the precipitating factors of cancer symptoms
What are the specific symptoms of advanced primary liver cancer
Liver cancer later waist pain, what method is there
How to diagnose is liver cancer excuse me, early or late
What symptom does small liver cancer have excuse me
What kind of cancer lump
Where is the human liver
What food does liver cancer late pain eat
Why is liver cancer found when most is advanced
What to do about cancer fever
What is the relationship between hepatitis, liver fibrosis, cirrhosis and liver cancer
What is the cause of late liver cancer hiccups
How long is the life of liver cancer
How to deal with malignant liver cancer
What is the sequential treatment of liver cancer and lung cancer
What contraindication does cancer patient have
What symptom does liver cancer patient have late dying
How is the liver cancer advanced what symptom does not have
How should excuse me liver cancer late be treated, what medicine to eat to stop ache
How does liver cancer patient vomit blood and pull blood
Can liver cancer middle-late patient eat pupae
What symptom does liver cancer turn lung to have
What are the symptoms of gastric CA
What are the symptoms of liver cancer metastasis to the lung
What are the three indicators of cancer
Can advanced liver cancer still be cured, what are the symptoms
How does liver cancer late hemoptysis pull blood do
Why is liver cancer found to be advanced
What contraindications does liver cancer surgery have
What is the indication of liver cancer surgery
What are the symptoms 1 hour before dying of advanced liver cancer
What are the criteria for defining high-risk groups of liver cancer
What does metastatic lung cancer mean
Is emphysema a complication of liver cancer
What is the long-term fever
What is the main symptom of advanced liver cancer lung metastasis
What is jaundice
How is secondary liver cancer checked
What symptom is shoulder pain caused by liver cancer
Primary liver cancer, how does late body turn yellow
Liver cancer late hemoptysis what food to eat good,
What is late throat stiff of liver cancer
What does liver cancer infect through
What is the traditional Chinese medicine explanation for cancer
Why is there no positive shape in the middle stage of liver cancer
How does advanced liver cancer ascites maintain
What symptom is there before dying of advanced liver cancer
How does liver cancer late painful foot swell do
Liver cancer late fever is good or bad
What symptom will appear in the early stage of liver cancer
What are the advantages and disadvantages of extracting ascites in advanced stage of liver cancer
What are the early symptoms of small liver cancer
Liver cancer diarrhea, foot swelling, how to improve
Why do patients with advanced liver cancer have swollen feet
What meal does liver cancer advanced stomach bleed eat
What is liver cancer hypertension related to
What kind of liver cancer can not be treated surgically
Test which blood is an indicator of cancer
What are the advanced symptoms and manifestations of liver cancer
What does hepatic mt mean
Is emphysema a complication of liver cancer
CT has shadow, calcification point, is it liver cancer
What is Aspergillus flavus
End-of-life symptoms of liver cancer
Survival of foot edema in advanced liver cancer
Whether liver cancer is contagious
What are the dietary taboos for cancer patients
Preliminary identification is how to treat advanced liver cancer
What is the cause of hiccups in advanced cancer
What symptom is liver cancer ascites late
Complications of liver cancer surgery
How to avoid the occurrence of liver cancer in life
What are the symptoms of liver cancer ten days before death
What early symptom does liver cancer have
How does liver cancer late abdominal distension have ascites treat
What is the index of cancer blood test
How is advanced liver cancer patient to return a responsibility with hemoptysis
What symptom can liver cancer appear
What does liver cancer ascites have late symptom
What are the symptoms 2 months before the death of liver cancer
What is the reason that liver cancer late eats vomit
Whether advanced liver cancer has infectivity
What is the way to relieve liver cancer
What does liver occupying mean
How is liver tumor diagnosed
What symptom does liver cancer have early
What is the reason that liver cancer is late face yellow
Why does the patient of liver cancer late have a fever
How is liver cancer late hypotension pull blood to return a responsibility
How does liver cancer late fever do
Why can the foot of liver cancer late be swollen
What does pathological classification of liver cancer mean specifically
What complication does liver cancer have with anhydrous alcohol treatment
What symptom does liver cancer not treat can cause
Is a cystic mass cancer
What are the symptoms of hepatitis C
How to exercise for liver cancer
Do liver cancer patients have to stop drinking
What are the symptoms of metastatic lung cancer
What drug does liver cancer advanced lung metastasis take
What symptom does liver cancer tongue have
Is liver cancer in advanced stage asymptomatic however how to return a responsibility
What is the symptom 2 days before dying of liver cancer
What are the hazards of advanced liver cancer
What are the MRI findings of primary liver cancer
What are the signs one day before death in patients with liver cancer
Premortem symptoms in patients with advanced liver cancer
How to prevent Cancer
What are the symptoms of liver cancer in general
What is the transcatheter arterial chemoembolization of liver cancer
What stage is 5cm size of liver cancer
Why is the foot of advanced liver cancer swollen
What symptom does liver cancer show in late stage
What are the diagnostic criteria for liver cancer
What are the complications after radiofrequency ablation of liver cancer
What symptom will the patient of liver cancer appear at advanced stage
What does liver cancer mean by high blood pressure
What supplement does liver cancer patient eat
What is liver pain symptom
What symptom does liver cancer appear to metastasize to have
What is the cause of late death of liver cirrhosis
How is right shoulder pain liver cancer
What can liver cancer patients eat to relieve symptoms
What are the end-of-life symptoms of patients with advanced liver cancer
What symptom is advanced liver cancer metastasis to the stomach
Does liver cancer late eat meat not digest
What is late liver cancer do chemotherapy common side effect
What symptom does liver cancer spread have
What is the painful location of liver cancer
What are the symptoms of liver cancer in the earliest 3 months
What does liver cancer patient eat more suitable
Why does liver cancer have blister in late stage
How does liver cancer patient do without urine
How to diagnose liver disease
What are the symptoms of advanced liver cancer before death
What are the symptoms of advanced liver cancer before death
Liver cancer patients appear foot swelling, how to do
What cancer is not fatal
What are the clinical symptoms of liver cancer
What tea to drink to prevent cancer
What is the normal value of hepatitis C RNA quantification
What reason does liver cancer late foot swell
Can liver cancer patient eat peanut
What is the symptom of lung metastasis of liver cancer
What is the dietary contraindication of cancer
Liver cancer tumor has 3 centimeters big serious is advanced
How should hydrops after liver cancer operation do
Liver cancer patients appeared jaundice and ascites how to do
What is the fever after liver cancer embolization surgery to return a responsibility
What does liver cancer have to do with cerebral infarction
How does advanced liver cancer appear ascites
How does liver cancer reduce jaundice
Cancer 20 year survival ranking
How to detect early liver cancer
How does liver cancer lower limb cold do
How to do body weakness after interventional treatment of advanced liver cancer
How should ascites appear in advanced liver cancer
What is early cancer, microcancer, occult cancer
How does the body of liver cancer late produce purple return a responsibility
Is space occupying cancer
How to check inflammatory pseudotumor of liver
How does liver disease cause splenomegaly do
How does liver cancer recur again
Family members just diagnosed with advanced liver cancer, want to know the survival rate of liver cancer
Which cancers can be treated with proton therapy, and how effective is it
Liver cancer is late always how to return a responsibility with fever.
How does stomach rise in late liver cancer do
How to do after interventional therapy of advanced liver cancer
Liver cancer recurred after operation, how to do
How is the skin of liver cancer patient more and more yellow return a responsibility
CT identification of hepatic cysts and liver cancer
How to do middle liver cancer often loose belly
Does ginsenoside have effect to liver cancer
How does ascites disappear at the end stage of liver cancer return a responsibility
Liver cancer tummy bloat how to do
How is liver cancer patient palm both sides very red to return a responsibility
What kind of sweating is cancer sign
Have liver cancer can't eat how should do
How to deal with serious liver cancer
What is the effect of 6 years of interventional therapy for advanced liver cancer
Liver cancer always has a fever how is burp vomit return a responsibility
How is liver cancer late face yellow to return a responsibility
What is the accuracy rate of tumor three check cancer
Excuse me, get liver cancer how to do
How does the eye yellow return a responsibility
How is the curative effect evaluation standard after radiofrequency ablation of liver cancer
How to do appendiceal tumor
Liver cancer appears jaundice and ascites how to do
How is the umbilical of liver cancer patient bulging to return a responsibility
How to do with blister on liver
How does liver cancer person burst thin do
What are the three test indexes of cancer
Liver cancer too fast how to do
How does liver cancer late stomach distention do
How to do in the middle and late stage of liver cancer Xuan move
What is the condition of liver cancer embolization intervention
How to do to infect hepatitis B after adult
Does early liver cancer have blood flow signals
How to do cancer prevention physical examination
What are the early symptoms of liver cancer by B-ultrasound
How is the effect of red technique leopard claw grass to treat second liver
How does liver cancer late tummy bloat do
Can liver cancer late do liver transplantation how to do
Liver cancer abdominal hard how to do
How does liver cancer late abdomen have a fever return a responsibility
How does liver cancer late body itch badly to do
What is the enhanced CT performance of liver cancer
How to check out hepatic ascites
Liver cancer advanced tumor grows how to do in portal vein
How to divide liver cancer cells
How to cauterize liver cancer
Liver cancer late suddenly eat not much how to do
Liver cancer shield how to return a responsibility
How does the recovery period after liver tumor resection have ascites
How to deal with pulmonary bullae after radiotherapy for primary liver cancer
What about the effect of interventional therapy for advanced liver cancer in 6 years
What are the three early signs of gastric cancer
Does panax notoginseng have an effect on cancer
Got liver cancer how just good
[truncated: 7,013 more rows]
[truncated: 5 more columns]

## Sheet: Manual labeling of liver cancer
The problem	Artificial labels	Artificial labels
There are several types of liver cancer	1
What are the common serious complications of liver cancer in clinic	1
Liver cancer and which dietary habits are related	1
Which organs do liver cancer easily metastasize to	1
What are the main routes through which liver cancer metastasize	1
Why do liver cancer cells metastasize	1
How long can early liver cancer surgery recover to be cohabitated	1
Where does liver cancer usually metastasize	1
Liver cancer is easy to metastasize to which organs	1
To which organs does liver cancer metastasize	1
Questions to know about liver cancer	1
Can Grandma's liver cancer be inherited from Mom	1
Can husband liver cancer cocoon infect	1
Whether parents with liver cancer will be inherited to their offspring	1
Is it true that eating sunflower seeds causes cancer	1
What are the hazards of regular drinking	1
What does smoking have to do with liver cancer	1
What is the transcatheter arterial chemoembolization of liver cancer	1
Can the bowl chopsticks that liver cancer eats infect	1
Is it contagious to eat with someone who has liver cancer	1
Can patients with liver cancer eat together with their families	1
Is it dangerous to eat with liver cancer patients	1
Can a man have liver cancer to covet	1
Can you be infected by living with someone with liver cancer	1
What are the healthy lifestyle	1
Can liver cancer lead a sexual life	1
Can liver cancer patients lead a sexual life	1
Can alcoholic liver disease be contagious	1
And liver cancer patient have sex to be able to infect	1
Can the thing that the patient of liver cancer of advanced stage eat infect	1
How can late liver cancer be contagious to prevent liver cancer	1
Can you be infected by living with liver cancer patients	1
Is drinking, smoking, and staying up late a surefire way to get cancer	1
Is cancer contagious? What needs special attention	1
Can liver cancer be transmitted by eating bowls and chopsticks together	1
Will liver cancer be contagious when eating together	1
Who is the high incidence group of liver cancer	1
What is tertiary prevention of liver cancer	1
Can liver cancer be transmitted by eating dishes and chopsticks	1
How long do people who drink every day live on average	1
Liver cancer eating bowls and chopsticks can be contagious	1
Eat with liver cancer patients, can be infected	1
What is transcatheter arterial chemoembolization	1
Excuse me, does liver cancer meet heredity have way to prevent can cure	1
B liver virus carrier, what should notice in life	1
What is a few kinds of hepatobiliary disease common in life	1
What is prophylactic intervention after liver cancer surgery	1
Eat the food of liver cancer patient can infect	1
What causes liver injury	2
Can food mildew induce liver cancer	2
What are the causes of right abdominal pain	2
What are the causes of right upper abdominal pain	2
What are the causes of vomiting in patients with liver cancer	2
You can get liver cancer from smoking, drinking too much, drinking contaminated water	2
Why does not smoking also cause liver cancer	2
Can smoking and drinking get liver cancer	2
Get alcohol liver to eat moldy food	2
Can drinking cause this liver cancer	2
What are the causes of liver cancer vomiting	2
What is the cause of vomit in late liver cancer	2
Why can drink alcohol get liver cancer	2
Liver cancer always has a fever how is burp vomit return a responsibility	2
Eat star anise back sweet get liver cancer	2
What reason does advanced liver cancer ascites not want to eat when	2
What causes vomiting in patients with liver cancer	2
What is the cause of liver cancer, can it be prevented	2
What is the reason that vomit is dark brown	2
Can excessive drinking cause liver disease	2
Why liver cancer vomiting	2
Why can't you eat moldy and spoiled food	2
How is liver cancer accompanied by active hepatitis to return a responsibility	2
Will there be anything wrong with eating corn with aflatoxin	2
Liver cancer is how much to have relation with drink	2
How is liver cancer formed to have relation with what to eat is an example	2
Accidentally eat moldy instant noodles will be liver cancer	2
Does liver cancer have a relationship with drinking	2
Can smoking cause liver cancer	2
What is the meaning of vomiting green liquid in advanced liver cancer	2
What causes liver cancer	2
What does the cause of liver cancer incidence have	2
How does liver cancer get	2
What causes liver cancer	2
What is the cause of liver cancer considered by traditional Chinese medicine	2
Can viral hepatitis become cancerous	2
Causes of liver cancer	2
Is liver cancer related to smoking	2
Is it true that you got liver cancer from taking entecavir	2
Like to eat peanut melon seeds can get liver cancer	2
Is liver cancer late vomit how to return a responsibility	2
Can drink excuse me cause liver cancer	2
Who drinks is more likely to get liver cancer	2
Why is drinking for a long time easy to get liver cancer	2
What is the cause of liver cancer and how can viral hepatitis be prevented	2	3
What is the cause of liver cancer viral hepatitis how to prevent	2	3
Can eat orchid seed cause liver cancer more excuse me	2
Is liver cancer caused by smoking	2
Who should pay the most attention to prevention of liver cancer	3
Prevention and interventional treatment of primary liver cancer	3
How to prevent liver cancer rupture and hemorrhage	3
How to avoid the occurrence of liver cancer in life	3
How to prevent Cancer	3
How to prevent lung cancer to reduce the incidence	3
How to effectively prevent liver cancer	3
How to prevent and detect early liver cancer	3
How to effectively prevent the occurrence of liver cancer	3
Daily attention to what aspects can prevent liver cancer	3
How to prevent cancer	3
How to prevent primary liver cancer	3
How to prevent liver tumor	3
Who should pay attention to the prevention of liver cancer	3
How does liver cancer prevent check	3
How to prevent liver cancer	3
How should liver cancer be prevented	3
How to prevent Liver Cancer	3
How to prevent liver cancer	3
How to prevent liver cancer in your life	3
How to prevent drug-induced liver cancer	3
How to effectively prevent liver cancer in daily life	3
How to prevent liver cancer in daily life	3
Prevention of recurrence and metastasis of liver cancer	3
How should liver cancer prevent Liver cancer can prevent	3
How to prevent primary liver cancer	3
How does hepatitis patient prevent to liver cancer	3
Liver cancer, how to prevent	3
How to prevent Liver cancer	3
How to prevent liver cancer	3
What measures do you have to prevent liver cancer	3
How to prevent secondary liver cancer	3
How to prevent liver cancer occurrence	3
How to prevent liver cancer in patients with hepatitis	3
Can liver cancer be prevented	3
What are the risks of liver cancer in life	3
How to prevent recurrence after left liver resection	3
How should liver cancer be prevented	3
How to prevent complications after interventional treatment of primary liver cancer	3
Excuse me, how should men prevent liver cancer	3
How to prevent hepatitis B infection	3
How to prevent primary liver cancer and interventional therapy	3	6
Is liver cancer hereditary how to prevent liver cancer	3
Prevention of Liver Cancer	3
Will liver cancer recur? How to prevent its recurrence	3
How to prevent Liver cancer	3
How to prevent liver cancer in daily life	3
How to prevent Liver cancer	3
How to prevent liver cancer	3
Prevention of primary liver cancer	3
What good way is there to prevent liver cancer	3
Preventing Liver Cancer	3
Is hepatitis B vaccine effective in preventing liver cancer	3
How to prevent ascites in patients with advanced liver cancer!	3
How early detection and prevention of liver cancer	3
Is blush after drinking more likely to get liver cancer	3
How does hepatitis B patient prevent liver cancer	3
Can liver cancer be prevented	3
Do not know what symptom to have early liver cancer how to prevent	3	5
How to prevent liver cancer	3
How does hepatitis B virus carrier prevent liver cancer	3
How to prevent liver cancer metastasis	3
How to prevent liver cancer with family history of hepatitis B	3
How to effectively prevent the occurrence of liver cancer	3
How to prevent liver cancer recurrence	3
How to prevent liver cancer	3
How to prevent liver cancer with familial tendency	3
How to prevent recurrence after liver cancer surgery	3
Early symptoms and prevention of liver cancer	3
There is a problem on the liver that needs what check	4
What items should be checked after liver cancer surgery	4
Determine whether liver cancer should do what examination	4
What diseases can be detected by color Doppler ultrasound of liver, gallbladder, spleen, kidney and pancreas	4
What tests to do if liver cancer is suspected	4
What should be paid attention to in palpation of liver cancer	4
What tests are needed to diagnose liver cancer	4
Can a chest X-ray detect liver cancer	4
What tests should be done before radiofrequency ablation of liver cancer	4
Liver cancer patients need to do what to prepare for liver transplantation	4
Suspected liver cancer to do what examination	4
Liver cancer do what examination can detect come	4
What reexaminations are needed after radiofrequency ablation of liver cancer	4
What tests are needed to confirm liver cancer	4
What tests are needed before liver cancer surgery	4
B-ultrasonography of liver cancer in its early stage	4
Determining which enzymes can assist in the diagnosis of liver cancer	4
What are the tumor marker tests for women	4
What are the relevant auxiliary examinations of primary liver cancer	4
What tests are needed to confirm liver cancer	4
What examinations should be done before hepatic vascular intervention	4
Liver examination ct is better or b ultrasound is better	4
How to treat advanced liver cancer with liver pain and abdominal distension and vomiting	4
What examination is needed to diagnose liver cancer	4
What time should be rechecked after liver cancer intervention	4
B-ultrasound precautions for liver cancer	4
I want to check whether I have liver cancer and what kind of tests I need to do	4
What department does the examination glutamyl transpeptidase hang	4
Check CA19-9 hang what department	4
What sites are examined by MRI	4
What are the preventive examinations for liver cancer	4
How is alcoholic fatty liver checked	4
What are the precautions for liver cancer examination	4
What are the precautions of liver cancer B ultrasound	4
What is the note that ferritin is on the high side	4
A: What do you need to pay attention to in the liver function test	4
Why do you need liver biopsy and liver histology	4
Is liver biopsy important	4
Can hepatic arteriography also diagnose liver cancer	4
The role of liver biopsy	4
Is liver biopsy harmful to people	4
How is nonalcoholic fatty liver disease checked	4
Do you have liver cancer screening in your hospital	4
Hear to check liver cancer to want to take a pill to do check what effect does specific have	4
What should be noted in liver cancer biopsy diagnosis	4
What are the advantages and disadvantages of liver biopsy	4
What examination should alcohol dependence disease do	4
What what does aspartic acid aminotransferase increase	4
Does checking liver need fasting	4
Is liver cancer biopsy risky	4
I have second liver, what check does need to do at ordinary times, prevent liver cancer	4
The doctor said that the preliminary diagnosis was liver cancer	5
Liver cancer resection, liver cirrhosis, big three Yang, ask the index of check below now serious	5
Two B chao, can you say this is liver cancer	5
More and more red spots on the body, Baidu said that there is a problem with the liver	5
Is the stabbing pain under the right ribs liver cancer	5
Is the pain under the right ribs in the upper abdomen liver cancer	5
Does liver cancer cause serious gastrointestinal bleeding	5
What are the causes of subcostal pain in the right abdomen	5
Is tongue base green tendon black liver cancer	5
Which diseases are easily misdiagnosed as liver cancer	5
The differential diagnosis of liver cancer with which diseases	5
How to avoid misdiagnosis of liver cancer	5
Is the dry cough more than a month after early liver cancer surgery recurrence	5
Whether the systemic bone pain has metastasis within 5 years after liver cancer operation	5
Liver cancer face white and anemia face white, can be seen	5
Causes of occasional stinging pain in the hepatic region	5
Causes of pain in the liver region of running	5
B liver, mother-to-child spread, the year before last, the mother checked out early liver cancer, has been cured	5
Liver cancer lung metastasis has what clinical manifestation	5
Liver cancer, recent bone pain, took a piece, excuse me is transferred	5
You can tell if you have liver cancer by checking the level of alpha-fetoprotein	5
Rock bath glycosidase 64. What's going on	5
Esophageal cancer metastatic liver cancer vomit how to return a responsibility to speak inclearly	5
Went to the hospital to do the examination, the current result is possible liver cancer	5
Excuse me doctor, drank wine sometimes liver area feel ache, eye is dry, can be	5
What is the reason that liver cancer late eats vomit	5
County hospital diagnosed with advanced liver cancer	5
What is the symptom of alcoholic liver cancer	5
What do liver cancer symptoms have	5
What is the precursor of liver cancer	5
Liver area and back pain is liver cancer	5
Feverish red nevus skin bleeding morning nausea	5
Is a single right shoulder pain liver cancer	5
Is right shoulder pain necessarily liver cancer	5
8 years of liver cirrhosis, these a few results can explain is liver cancer	5
Is the diagnosis of liver biopsy safe	5
Have B liver, after treatment take medicine a month check, find a protein rises a lot	5
What disease is nausea after eating	5
A patient with liver cancer who starts vomiting is not getting worse	5
What is it about being nauseated all the time	5
What about nauseated eating in the morning	5
How is complexion yellow to return a responsibility	5
How is glutamyl transpeptidase high to return a responsibility	5
What does elevated carcinoembryonic antigen mean after gastric cancer surgery	5
Can alcoholic liver disease get liver cancer	5
What are the symptoms of alcohol liver cancer	5
What are the symptoms of alcoholic liver cancer in the middle and late stages	5
A second recurrence after surgical resection of a primary liver cancer	6
I greatly advanced liver cancer, has liver ascites can also be treated at the beginning said lumbago	6
The cost and effect of interventional therapy after liver cancer surgery are good	6	11
Can "argon-helium knife" be used to treat liver cancer	6
Treatment liver slip operation which hospital is good	6
What are the effects of radiofrequency ablation on the liver area	6
How can liver cancer relapse in two months be controlled	6
Which nutrient solution should be transfused in advanced stage of metastatic liver cancer	6
When can small liver cancer do interventional therapy and radiofrequency ablation	6
Must radiofrequency ablation be done after liver cancer interventional therapy	6
What are the clinical manifestations of liver failure	6
Which is better for the treatment of liver cancer with radiofrequency ablation or surgical resection	6
Can Gamma knife surgery treat liver cancer and liver metastases	6
What are the advantages of Da Vinci robotic surgery in the treatment of liver cancer	6
Can radiofrequency ablation cure liver cancer	6
Can radiofrequency ablation of liver cancer be repeated	6
Which is better for the treatment of liver cancer with gamma knife radiotherapy or radiofrequency ablation	6
Is radiofrequency ablation of liver cancer painful	6
What are the advantages of argon-helium knife cryoablation therapy for liver cancer	6
Can estrogen and progestogen be taken orally in liver transplant patients with liver cancer	6
After radiofrequency ablation treatment of liver cancer	6
Liver cancer recurred 2 months after operation	6
Whether liver cancer can be resected	6
How to intervene in several complicated cases of advanced liver cancer	6
Does radiofrequency ablation of liver cancer have a high success rate	6
Is liver resection risky	6
Can advanced liver cancer be treated conservatively	6
How can advanced liver cancer be treated to relieve the suffering of patients	6
What are the advantages of iodine-125 seed implantation in the treatment of liver cancer	6
How long can interventional therapy be performed after radiofrequency ablation of liver cancer	6
How long should the interval of interventional therapy for liver cancer be	6
Can liver cancer chemotherapy kill cancer cells completely	6
Liver cancer bone metastasis, excuse me how to treat the next step.	6
Is radiofrequency ablation effective in the treatment of liver cancer	6
Which HCC patients are eligible for minimally invasive techniques	6
What are the oxaliplatin chemotherapy options available	6
What are the interventional treatment of liver cancer and how many times to do it	6
Can interventional therapy be performed for metastatic liver cancer	6
What are the indications for radiofrequency ablation of tumors	6
After liver cancer operation can take ginseng one capsule need to take how long	6
How to reduce the pain of advanced liver cancer	6
What are the worries and shortcomings of the treatment plan of various liver cancer how to choose	6
Can radiofrequency ablation be combined with surgery to treat liver cancer	6
What are the indications of minimally invasive interventional therapy for liver cancer	6
What should be the next step in the treatment of liver cancer	6
Can liver cancer be controlled	6
How long to do radiofrequency ablation after liver cancer embolization interventional therapy	6
Radiofrequency ablation or microwave ablation for the treatment of liver cancer	6
What are the conditions for liver transplantation	6
Liver cancer is treated several times a month	6
Can radiofrequency ablation eradicate liver cancer	6
Liver cancer can do a few interventions	6
Liver cancer metastasis lymphoma do not eat anything	6
Draw blood to check tumor marker to be able to detect cancer	6
About taking Ganfule after liver cancer surgery	6
Primary liver cancer in what circumstances need surgery and need to pay attention to what	6	8
How long can you take targeted drugs for liver cancer	6
Liver cancer is advanced how long to eat Chinese herbal medicine	6
Is eating cordyceps sinensis good for liver cancer patients	6
Can liver cancer patients eat an Gong Niuhuang pill	6
Giant liver cancer, interventional therapy, take targeted drugs, what good Chinese medicine do you have excuse me	6
Can liver cancer take target drug under what circumstance	6
Can liver cancer eat gastrodia	6
Can liver cancer eat Huaishan	6
Can eat rhodiola prevent liver cancer and treat liver cancer	6
Can liver cancer cold take medicine to eat	6
Liver cancer advanced and have ascites what medicine should take to be able to treat	6
What drug can liver cancer appear double lower limb edema take to detumescence	6
How long should we take entecavir dispersible tablets in large three Yang anti-virus	6
Can you eat Huaier after liver cancer interventional operation	6
Early liver cancer has been resected need to do intervention and take rake to drug	6
Can liver cancer not eat to go to meal to be improved after interventional therapy	6
Liver cancer pain to eat which traditional Chinese medicine can relieve pain	6
Eat entecavir how to get liver cancer treatment	6
How about the effect of hepatic arterial chemoembolization in the treatment of liver cancer	6
How does toad skin cooperate Chinese herbal medicine eat ability treat liver cancer	6
What drug should liver cancer medium-term interventional therapy take twice	6
How does liver cancer get up vomit to treat	6
What medicine does liver cancer tongue pain take in advanced stage	6
How does hepatic artery embolization of liver cancer chemotherapy	6
How should excuse me liver cancer late be treated, what medicine to eat to stop ache	6
What drug does liver cancer advanced lung metastasis take	6
Have liver cancer can't eat how should do	6
How is the curative effect evaluation standard after radiofrequency ablation of liver cancer	6
Liver cancer late suddenly eat not much how to do	6
Liver cancer makes nausea how to do	6
How does the recurrence of liver cancer after intervention do	6
Can liver cancer eat Xiaoyao pill	6
Liver cancer late do not eat how to do	6
What is the effect of eating apatinib	6
What medicine does the person that carries second liver virus eat is better	6
Is sorafenib effective for patients with liver cancer	6
How to improve the quality of life of patients with liver cancer	6
Liver cancer, did interventional surgery, take anticancer drugs to have effect	6
Eat drappen grass liver cancer can be good	6
Nausea liver cancer how to treat	6
Can C liver take Chinese medicine to treat	6
After interventional ablation of liver cancer, patients could not eat and had fatigue	6
What targeted drug does liver cancer take late	6
Can taking medicine in advanced stage of cirrhosis prevent liver cancer	6
What drug does the patient of liver cancer of advanced stage eat to be good	6
What drug does liver cancer advanced lung metastasis eat good	6
What does liver cancer late eat to stop pain	6
Is liver cancer useful to eat dolomite	6
What traditional Chinese medicine does liver cancer have to eat with advanced stage ascites	6
What Chinese patent medicine does liver cancer advanced patient eat good	6
What traditional Chinese medicine should liver cancer late take	6
What drug does liver cancer late pain take	6
What painkiller does liver cancer ache eat	6
Drink to get liver cancer, can eat traditional Chinese medicine cure	6
What does liver cancer late eat not painful	6
What drug does liver cancer late eat antiemetic	6
What drug does liver cancer late liver ascites hemoptysis eat good	6
What drug does gastric liver cancer take late is good	6
One month after liver cancer surgery, now I have a little cold symptoms, can I eat 999 Ganmaoling granules	6
After liver cancer interventional surgery, his abdomen was full and he could not eat	6
What drug does liver cancer liver ascites eat good liver cancer ascites how should be treated	6
What can high alkaline phosphatase eat to come down	6
What is the effect of taking targeted drugs for liver cancer for 5 years	6
What medicine does big three Yang eat have good effect	6
Can early liver cancer take traditional Chinese medicine to control	6
What Chinese herbal medicine can liver cancer take late to control illness	6
Colon cancer metastatic liver cancer, do not want chemotherapy, want targeted drugs	6
How to deal with liver ascites what traditional Chinese medicine to eat can remove ascites	6
Can taking western medicine prolong liver cancer	6
Liver cancer to what extent to take targeted drugs	6
What traditional Chinese medicine can liver cancer take late extend life	6
What traditional Chinese medicine can liver cancer patient eat excuse me relieve	6
Hello doctor can say Chinese medicine how to eat	6
Can the disease of what Chinese medicine of liver cancer advanced stage eat excuse me relieve	6
How does liver ascites deal with what traditional Chinese medicine can be taken to treat well	6
What Chinese medicine should jaundice obstructive liver cancer eat	6
How does liver cancer advanced giddy nausea vomit do	6
Liver cancer 6 times interventional doctor said can only live 6 months how to do	6
What Chinese herbal medicine to take to treat liver cancer	6
Can eat toad cure liver cancer	6
Can liver cancer have jaundiced Muji granules and Yinzhihuang granules be eaten at the same time	6
Eating less and less after taking lenvatinib, is the drug ineffective	6
Do big three Yang need to take medicine	6
Liver cancer patients get up vomit how to do	6
Does liver cancer eat sorafenib to have effect, cost is high	6	11
Liver cancer patients get up to vomit how to do	6
Liver cancer patients with lung metastasis are now eating Jinlong glue useful	6
What drug does liver cancer late take best	6
What Chinese medicine to eat after liver cancer surgery is good	6
What Chinese medicine does liver cancer patient eat	6
What drug does liver cancer take late	6
What drug does liver cancer take late is good	6
What medicine does liver not taste	6
What Chinese medicine does liver cancer patient eat good	6
What analgesics does liver cancer take	6
What traditional Chinese medicine does liver cancer take late	6
What drug does liver cancer eat	6
What Chinese patent medicine does liver cancer eat	6
What medicine does liver cancer take best	6
What to eat to prevent liver cancer	6
What drug does liver cancer late liver ache eat	6
What drug does liver cancer take after operation	6
What Chinese medicine is good to eat in advanced liver cancer	6
What drug does liver cancer sclerosis eat	6
What herbal medicine does liver cancer take late	6
What drug does liver cancer have hypertension to eat	6
What traditional Chinese medicine can you drink in the middle of liver cancer	6
What Chinese herbal medicine does liver cancer eat	6
What drug does liver cancer take	6
How to treat alcoholic liver disease	6
What good treatment does liver cancer disease medicine eat	6
How to treat nausea and vomiting	6
What should I do if liver cancer metastasises to the bone and lumbar spine after surgery	6
Can benign liver tumors be cured after surgical resection	6
Does small liver cancer have capsule even need radiotherapy	6
Is sanqi powder good to liver	6
Is excuse me the disease of liver cancer now how to treat good hospital to have recommendation	6	11
Can the pain of advanced liver cancer be slowed down by eating selenium Weikang chewable piece	6
Liver cancer bone metastasis, take Lenva, liver tumor small bone tumor large, whether to change the rake to the drug	6
What traditional Chinese medicine is good with advanced liver cancer vomiting dizziness limbs weakness	6
Liver cancer in the late stage can eat donkey glue blood granule	6
How to do if you can't eat food in advanced liver cancer	6
Liver cancer patients do not like to eat body thin liver pain	6
What does liver cancer late eat to benefit absorption	6
What condition should liver cancer have with anhydrous alcohol treatment	6
Liver cancer late vomiting can't do	6
What food does liver cancer eat to recover quickly	6
How does liver cancer late eat vomit	6
How to relieve liver cancer vomiting	6
What drug is good with advanced liver cancer vomiting limbs weakness	6
Can primary liver cancer eat traditional Chinese medicine cure	6
Can the patient of liver cancer advanced take traditional Chinese medicine	6
Can late liver cancer eat traditional Chinese medicine good	6
Can advanced liver cancer be treated with traditional Chinese medicine	6
What drug does small three Yang take	6
What medicine does small three Yang eat best	6
Wife liver cancer is nauseated recently, what good method has.	6
Can liver cancer take Chinese medicine to control	6
What drug to take after liver cancer surgery can control cancer cell recurrence	6
Liver cancer vomit how to do not eat	6
How long does the liver cancer have fever and stomachache after interventional therapy	7
Pain after regorafenib for liver cancer	7
What are the adverse reactions of radiofrequency ablation for liver cancer	7
What are the possible adverse reactions of radiofrequency ablation in the treatment of liver cancer	7
Liver cancer does interventional what response	7
Vomiting after interventional surgery for liver cancer	7
How long will the liver region still swell after advanced liver cancer surgery last	7
How long is normal for fever after interventional therapy for liver cancer	7
How much is the fever after interventional treatment of liver cancer	7
What is diarrhea after liver cancer surgery to return a responsibility	7
Is hiccup after liver cancer surgery late	7
How does a month after liver cancer operation do all the time abdominal distension	7
It has been half a year since the liver cancer intervention. He has had a fever in the liver	7
After liver cancer surgery, the nose is red for nearly two months, which is the reason	7
10 days after liver cancer ablation surgery, the fever has been low for 18 days	7
After liver cancer surgery, I am taking targeted drug sorafenib, and I have eczema on both sides of the anus	7
After the liver cancer interventional surgery (more than 20 days), the patient always felt uncomfortable in the stomach	7
Can take entecavir get liver cancer	7
How to do vomit after liver cancer intervenes surgery	7
What about sorafenib-related diarrhea after liver transplantation for liver cancer	7
What are the symptoms of liver cancer after interventional therapy	7
What are the common postoperative complications of liver cancer	7
What are the sequelae after liver cancer surgery	7
How does stomach ache after liver cancer radiotherapy want to treat	7
What is the adverse reaction after primary liver cancer chemotherapy	7
After advanced liver cancer chemotherapy, the liver part is more painful, is chemotherapy useless	7
What complication does liver cancer have with anhydrous alcohol treatment	7
What are the complications after radiofrequency ablation of liver cancer	7
How should hydrops after liver cancer operation do	7
What is the fever after liver cancer embolization surgery to return a responsibility	7
How to do body weakness after interventional treatment of advanced liver cancer	7
How to deal with pulmonary bullae after radiotherapy for primary liver cancer	7
How to do nausea and vomiting after chemotherapy of liver cancer	7
How does sleep bad do after liver cancer surgery	7
Liver cancer after surgery, what negative effect does eat Cialis have	7
How to do very painful forehead after liver cancer interventional treatment	7
How is tummy bloating to return a responsibility after liver cancer embolism treatment	7
What is flow yellow water to return a responsibility after radiofrequency ablation of liver cancer	7
How does ascites appear after liver cancer surgery	7
What about gastric acid after radiotherapy for liver cancer	7
How should the patient's abdominal distension do after liver cancer radiotherapy	7
How does the loose stomach do after liver cancer eats Chinese medicine	7
How to do abdominal distension after liver cancer interventional operation	7
What is abdominal distention pain after liver cancer interventional therapy to return a responsibility	7
Adverse reactions after interventional therapy for liver cancer	7
What are the common complications after liver cancer resection	7
How to treat fever after chemotherapy	7
How does liver area pain do after treatment of advanced liver cancer	7
How does hemoptysis do after liver cancer chemotherapy	7
How to make back pain after primary liver cancer treatment	7
What are the symptoms of liver cancer after radiofrequency ablation	7
What are the complications after liver cancer resection	7
What are the complications after interventional surgery for liver cancer	7
What reaction does liver cancer have after interventional operation	7
What are the complications of ultrasound interventional ablation in the treatment of liver cancer	7
What are the reactions after radiofrequency ablation of liver cancer	7
What are the complications after liver cancer ablation	7
What complications will occur after liver cancer surgery	7
What are the adverse reactions after interventional treatment of gallbladder cancer	7
How is bile and stomach ache to return a responsibility after liver cancer surgery	7
How does hemoptysis do after liver cancer surgery	7
What is fever to return a responsibility after interventional therapy of liver cancer	7
How to do fever after liver cancer interventional therapy	7
Is there any performance after targeted therapy of liver cancer	7
What are the postoperative complications of primary liver cancer	7
What complication does liver cancer have after operation	7
What drug is back pain treated with after liver cancer operation	7
What are the adverse reactions of iodine-125 seed implantation in the treatment of liver cancer	7
There were no other adverse reactions after liver cancer surgery	7
The patient felt flatulence around the stomach and lost appetite after interventional surgery for liver cancer	7
Is liver cancer interventional therapy have side effect price is how much	7	11
What is the cause of abdominal distension after liver cancer embolization	7
My father developed pleural effusion after surgical resection of liver cancer on April 25	7
Decreased appetite after lenvatinib and now eats very little!	7
Why does the right shoulder ache after liver cancer intubation chemotherapy	7
Lenvatinib in advanced liver cancer results in elevated bilirubin 180	7
What are the postoperative complications of TACE treatment	7
Insomnia and muscle and bone pain after chemotherapy for liver cancer	7
How to treat dyspnea after liver cancer interventional embolism	7
How does nausea and vomiting do after liver cancer intervenes	7
How long does fever last after liver cancer interventional therapy generally	7
What are the common adverse reactions of radiotherapy in patients with liver cancer	7
How to return a responsibility is vomit that appears in liver cancer interventional treatment	7
How is liver area pain to return a responsibility after liver cancer intervenes to treat	7
Is fever a good thing after liver intervention	7
What reason is vomit after liver cancer operation	7
Is fever a good thing after liver cancer interventional therapy	7
What is the cause of fever after liver cancer intervention	7
Is fever normal after chemotherapy	7
Leg edema and vertebral destruction after liver cancer surgery	7
Liver cancer interventional surgery after abdominal distension, unable to eat	7
What are the adverse effects of Domagide on liver cancer	7
What bad symptom does liver cancer patient eat toad coat to have	7
Why is rib pain after liver cancer surgery	7
What is the cause of stomach discomfort after liver cancer intervention	7
What preparation should be done before radiofrequency ablation of liver cancer	8
What are the precautions during interferon therapy	8
What should be paid attention to in the follow-up of chest tightness after liver cancer intervention	8
What are the indications for trisegmentectomy	8
Which liver tumors are suitable for laparoscopic surgery	8
What are the indications and contraindications of interventional therapy for liver cancer	8
125 iodine particles in the treatment of liver cancer should note what	8
Is liver cancer surgery for everyone	8
What minimally invasive surgery for liver cancer includes	8
What to look out for after early liver cancer symptoms	8
What should be paid attention to in the first course of liver cancer	8
What precautions should be taken for patients with advanced liver cancer after minimally invasive surgery	8
What should be paid attention to after liver cancer metastasis to the lung	8
What to do before liver cancer surgery	8
What preparations should be made before liver cancer surgery	8
What to pay attention to in liver cancer inhalation	8
What are the precautions after minimally invasive liver surgery	8
What are the cautions of right hemihepatectomy	8
What are the cautions of ultrasound-guided microwave ablation in the treatment of liver cancer	8
What problems should be paid attention to in advanced liver cancer	8
What preparation is needed before liver cancer surgery	8
What should we pay attention to after precise liver resection	8
How to care after liver metastasis surgery	8
How to care for radiofrequency ablation of liver cancer	8
What are the precautions of antiviral therapy in patients with hepatitis B	8
What do patients with liver cancer need to pay attention to	8
How to care for liver cancer after interventional therapy	8
What needs to be paid attention to in the follow-up treatment of liver cancer	8
What are the precautions after interventional treatment of liver cancer	8
What do liver cancer patients need to pay attention to	8
Liver cancer patients with pain should pay attention to what	8
Liver cancer interventional treatment needs to pay attention to what	8
What should patients with liver cancer pay attention to	8
What should liver cancer patients pay attention to	8
What are the precautions for patients with liver cancer	8
What are the symptoms of liver cancer, what needs to be noted	8	5
What are the symptoms of liver cancer, what needs to be noted	8	5
What are the precautions of patients with chronic hepatitis	8
What to look out for in liver cancer	8
What are the precautions of liver cancer	8	9
What should pay attention to liver cancer	8	9
How does liver cancer late need to be treated to need to notice what	8	6
What does liver cancer chemoradiotherapy need to pay attention to	8
What should patients with advanced liver cancer pay attention to when they eat Dolomite	8
What does the patient with liver cancer need to notice excuse me	8
Appeared liver cancer how should do what should notice	8
How should do after liver cancer operation	8
How to regulate after liver cancer middle and late operation	8
What are the precautions after microwave therapy	8
What are the cautions for cirrhosis	8
What does the person that chronic second liver virus carries note to have	8
What does liver cancer need to pay attention to	8
Check out to have liver cancer what need to pay attention to	8
What still needs attention after liver cancer treatment	8
What liver cancer should be noted in the middle of liver cancer how to treat	8	6
Precautions after interventional therapy for liver cancer	8
What should patients with intrahepatic cholangiocarcinoma pay attention to after operation	8
What are the precautions after liver transplantation	8
What are the cautions of radiofrequency ablation for large hepatocellular carcinoma	8
What are the precautions of hemoptysis in advanced liver cancer	8
What are the precautions after radiofrequency ablation of liver cancer	8
What are the precautions after radiofrequency ablation of liver cancer	8
What are the precautions for small hepatocellular carcinoma 3 months after operation	8
What does early liver cancer notice	8
What should be noticed in the early stage of liver cancer	8
What should liver cancer patients pay attention to	8
What should patients in the middle stage of liver cancer pay attention to	8
What are the precautions for patients with cirrhosis	8
How to nurse after primary liver cancer operation	8
What should diffuse liver cancer notice	8
What should be paid attention to when treating liver cancer patients with TACE	8
What does a friend need to pay attention to after getting liver cancer	8
What should be paid attention to in postoperative nursing of primary liver cancer after interventional therapy	8
What should be paid attention to in the follow-up treatment of advanced liver cancer	8
What does liver cancer patient notice	8
What are the matters needing attention after liver cancer surgery	8
What does liver cancer pay attention to	8
What should small three Yang pay attention to	8
B liver big three Yang, need attention what point	8
What should second liver patient notice	8
How to care for liver cancer after operation	8
Got liver cancer what should notice	8
What should pay attention to after liver transplantation of liver cancer	8
What should be paid attention to in postoperative care of liver cancer	8
What should liver cancer pay attention to	8
What should note after liver cancer operation	8
What should you pay attention to in liver cancer	8
What should we pay attention to after liver cancer surgery	8
How to care for liver cancer after operation	8
What is the matter for attention after liver cancer intervenes	8
What should we pay attention to before liver cancer surgery	8
What should be noted in the late stage of liver cancer	8
What should be paid attention to in postoperative nursing of patients with liver cancer	8
What to pay attention to after liver cancer surgery diet	9
How to care for secondary liver cancer after interventional therapy	9
Got liver cancer what should diet notice	9
Liver cancer after interventional therapy for a week can eat fish	9
Suspected liver cancer need to pay attention to what problems	9
What problems should be paid attention to on the diet of liver cancer	9
What do you notice on diet for advanced liver cancer with abdominal pain and abdominal distension	9
How to care for liver cancer after surgical resection	9
See liver cancer patient excuse me, what thing is more appropriate	9
What are the dietary contraindications and precautions for patients with liver disease	9
What do liver cancer patients need to pay attention to in terms of diet after interventional therapy	9
Got liver cancer on diet should notice what good	9
What should be noted on liver cancer diet	9
Liver cancer appetite is good need to pay attention to what problems	9
Liver cancer patients in the diet should pay attention to what problems	9
Liver cancer diet need to pay attention to what problems	9
Liver cancer diet should pay attention to what problems	9
What are the nursing after interventional microwave ablation	9	10
Got liver cancer what should notice on diet	9
What should the patient of liver cancer notice on diet at ordinary times	9
Can liver cancer metastatic lung eat bird's nest	9
How is right lower abdominal pain to return a responsibility after liver cancer operation	9
Liver cancer patients with large appetite need to pay attention to what problems	9
Can liver cancer patient eat soft-shelled turtle	9
Moderate fatty liver, what should diet notice can turn to liver cancer	9
Can liver cancer eat salad	9
Can liver cancer eat longan	9
Can a cold eat soft-shelled turtle	9
Can liver cancer not eat sweets	9
Can liver cancer eat Onions	9
Can liver cancer patients eat chicken	9
Can liver cancer patients eat American ginseng	9
What should the diet pay attention to during the treatment of liver cancer	9
What should liver cancer patients pay more attention to on their diet	9
Can liver cancer eat American ginseng	9
What can you eat on liver cancer diet	9
Can liver cancer eat red beans	9
Can liver cancer patients eat Onions	9
Can you eat sea cucumber recuperation after liver cancer surgery	9
Can liver cancer gecko eat	9
What fruit does liver cancer eat better	9
Can the patient of liver cancer advanced dry fruit kind eat	9
Peanut butter liver cancer can eat	9
How long can you eat hot pot after liver cancer surgery	9
Can liver cancer eat peanut	9
Can liver cancer eat tofu	9
Can liver cancer eat black rice	9
Can liver cancer patients eat ejiao after surgery	9
Can liver cancer eat seafood	9
Can liver cancer patients eat pomegranate fruit	9
Liver cancer late can eat melon	9
Can the patient of liver cancer eat onion	9
Can liver cancer patients not eat rooster	9
Liver cancer can eat acid	9
Can liver cancer be jealous	9
Can liver cancer patients eat nuts	9
Liver cancer American ginseng can eat	9
Can liver cancer orange be eaten	9
Can you eat pig liver after liver cancer surgery	9
Can liver cancer patients eat centipede	9
Can liver cancer patients eat ants	9
Can liver cancer eat American ginseng	9
What food can liver cancer advanced liver ascites eat good	9
Can liver cancer eat Ganoderma powder	9
What to eat to kill liver cancer cells	9
Can liver cancer eat fish what fish can eat good	9
Can liver cancer eat honey	9
Can liver cancer patients eat Ganoderma	9
Is it good for cancer to eat sea cucumber	9
Can liver cancer eat mulberry yellow	9
Can liver cancer eat turmeric	9
What good can liver cancer late recombine season eat	9
Can liver cancer saffron be eaten	9
Can liver cancer ejiao be eaten	9
Can often drink coffee to prevent liver cancer	9
Can you drink milk after liver cancer surgery	9
Can liver cancer eat papaya	9
What thing can early liver cancer eat	9
Can liver cancer eat tomatoes	9
Can liver cancer eat shrimp	9
Can liver cancer eat Coix rice	9
Can liver cancer eat salty	9
Can liver cancer eat garlic	9
Can liver cancer eat raisins	9
What can advanced liver cancer spread eat	9
Liver cancer patients can eat spirulina	9
I did liver cancer operation more than a year what to eat to compare health care	9
Can you eat bird's nest with ganoderma lucidum and propolis every day after liver cancer surgery	9
Can liver cancer eat black fungus and mushroom	9
What foods should be eaten more to prevent liver cancer	9
The recipe that suits liver cancer patient to eat has what	9
Foods you can't eat for liver cancer	9
What foods should patients with liver cancer eat more	9
What are the foods to prevent liver cancer	9
Can eating loach treat advanced liver cancer	9
Can liver cancer eat mushrooms	9
What can liver cancer patients eat to supplement the spirit	9
What should liver cancer late eat	9
What food should liver cancer late eat	9
What nutritive product does liver cancer patient eat	9
What is good for constipation in advanced stage of liver cancer	9
Liver cancer patients at home, what to eat at ordinary times	9
What dish can liver cancer eat relieve	9
What food does liver cancer late pain eat	9
Can liver cancer middle-late patient eat pupae	9
Liver cancer late hemoptysis what food to eat good,	9
What meal does liver cancer advanced stomach bleed eat	9
What supplement does liver cancer patient eat	9
What can liver cancer patients eat to relieve symptoms	9
Does liver cancer late eat meat not digest	9
What does liver cancer patient eat more suitable	9
Can liver cancer patient eat peanut	9
Does ginsenoside have effect to liver cancer	9
How does fresh dendrobium officinale suit to liver cancer patient eat	9
Can the person that has liver cancer eat soy bean sprouts	9
Can second liver big three Yang eat fruit	9
What is the benefit that second liver eats Moringa seed	9
What good is second liver small three Yang to eat	9
Can you eat seafood for liver cancer	9
Can liver cancer patients eat royal jelly	9
What foods should not be eaten for hepatitis B	9
What does liver cancer patient eat more to help control disease	9
Liver cancer patients can not eat what	9
Liver cirrhosis liver cancer takes a point liver ascites which vegetables and which fruit cannot eat	9
What foods should not be eaten in patients with liver cancer	9
Cancer Which foods should not be eaten	9
B liver cannot eat what things	9
Can eating raw loach cure liver cancer	9
How should you eat during liver cancer treatment	9
What are the benefits of eating sea cucumber often	9
Can liver cancer eat crabs	9
What does liver cancer patient eat to help recover can eat egg	9
Got liver cancer can eat cordyceps	9
Can liver cancer eat bean sprouts	9
Got liver cancer at ordinary times what should notice in the life	9
Patients just got liver cancer should pay attention to what food to eat	9
What are the side effects of lycium barbarum that eat much can cause cancer	9
What should you eat after liver cancer ablation treatment	9
Can liver cancer eat sweet potatoes	9
Can liver cancer eat fish	9
Can liver cancer patients eat yellow peel fruit	9
Can liver cancer eat shrimp	9
How is the effect of liver cancer to eat much 吉 beauty	9
What does bilirubin eat with high	9
What fruit should liver cancer patient eat	9
Does liver cancer patient eat ginseng	9
Can liver cancer patients eat protein powder	9
Can liver cancer eat ginseng	9
Can liver cancer patients eat eggs	9
Can liver cancer patients eat eggs	9
Can liver cancer eat protein powder	9
What food cannot liver cancer patient eat	9
What is good when liver cancer patient eats	9
What does liver cancer eat after chemotherapy of advanced stage	9
What can the patient of middle and advanced liver cancer eat	9
What does leucocyte eat low after liver cancer chemotherapy	9
What to eat can relieve liver cancer	9
What vegetables prevent liver cancer	9
Can liver cancer eat garlic	9
What fruit should liver cancer patient eat good	9
What food does liver cancer eat to fight cancer	9
What does liver cancer eat at ordinary times good	9
Can liver cancer patients eat ginger	9
What is good to eat during liver cancer chemotherapy	9
What can liver cancer patients eat to prevent liver cancer	9
What supplement is good for liver cancer	9
What is good to eat in liver cancer recovery period	9
What is good to eat after liver cancer early operation	9
What is best to eat after liver cancer surgery	9
What does liver cancer late eat recuperate	9
What is forbidden to eat in patients with liver disease	9
What does slight liver cancer eat good	9
What can primary liver cancer not eat	9
What food to eat to resist liver cancer	9
What food does advanced liver cancer eat good	9
What should liver cancer patient eat, can drink what water, still avoid what to eat	9
What can liver cancer eat to relieve	9
What should patients with advanced liver cancer eat	9
What to eat during liver cancer chemotherapy	9
What should liver cancer late eat	9
What fish can liver cancer patient eat	9
Can liver cancer eat meat	9
What food does liver cancer eat late good	9
Liver cancer patient, what should eat cannot eat what	9
What good does liver cancer patient eat in the morning	9
What food does primary liver cancer eat best	9
What food does liver cancer patient eat is good	9
What should patients with primary liver cancer eat	9
Can liver cancer patients eat ginseng	9
What good does liver cancer late eat what can not eat	9
Can liver cancer patients eat cordyceps	9
Liver cancer eat what good a little faster	9
Can liver cancer patients eat sea cucumber	9
What should liver cancer patient eat	9
What does liver cancer eat to aggravate the condition	9
What good is liver cancer late diet to eat	9
What food does liver cancer eat best	9
Got liver cancer what dish to eat good	9
Liver cancer patient, abdominal swelling, what can eat excuse me detumescence	9
Can liver cancer eat pig blood	9
What is good to eat after liver cancer surgery is removed	9
Liver cancer eat what meal good fast	9
What can you eat after hemoptysis of liver cancer	9
What should eat after liver cancer operation	9
Can liver cancer patients eat fish	9
What can liver cancer patients eat after surgery	9
What food does liver cancer eat good	9
What vegetable does liver cancer eat good	9
What can liver cancer eat not to eat what	9
What is good for liver cancer diet to eat	9
Can liver cancer eat fruit	9
What is the diet of liver cancer patient to eat	9
What to eat after liver cancer early surgery	9
Can liver cancer patients eat fruit	9
What does liver cancer ascites eat to drain	9
What can liver cancer not eat	9
Got liver cancer can't eat what	9
Liver cancer can eat fish	9
What is not suitable for late liver cancer	9
Can drinking often get liver cancer	9
What are the fruits that cancer cannot eat	9
What should be noted with liver cancer at ordinary times	9	10
Can liver cancer patient eat leek	9
Can the late stage of liver cancer use Moringia soup to eat	9
Can liver cancer eat rabbit meat	9
Can liver cancer patient eat mutton	9
What should you eat after second liver cancer causes primary liver cancer surgery	9
How to prevent liver cancer. What do you need to eat	9
Can liver cancer patient eat silkworm pupae	9
What benefit does eat grapefruit peel have	9
What do you eat for your liver	9
Can liver cancer patients eat seafood	9
What fruit can't the patient with liver cancer disease eat at ordinary times	9
Can liver cancer eat mutton	9
Can liver cancer eat beef	9
What should you eat during chemotherapy for liver cancer	9
What energy exuberant to eat	9
Can liver cancer patients eat protein powder	9
Can liver cancer patients eat eggs	9
Can liver cancer eat soft-shelled turtle	9
Can liver cancer eat protein powder	9
How to eat liver cancer	9
Can liver cancer eat eggs	9
What does liver cancer eat	9
What can liver cancer patient eat	9
What does liver cancer eat good	9
Can liver cancer eat eggs	9
Can Jin Sumei liver cancer be eaten	9
Can liver cancer patients eat plums	9
Can tea liver cancer patients eat	9
Can liver cancer patients eat ejiao	9
Do you need gastric lavage after liver cancer surgery to eat spicy stimulating things	9
What does liver cancer disease eat better	9
Can liver cancer eat sweet and sour garlic	9
Can liver cancer eat carrot fringe	9
Got liver cancer at ordinary times what should notice	9	10
Interventional therapy can not eat what food	9
Liver cancer initial can eat meat	9
Can liver cancer patient eat honeycomb	9
Liver cancer late can eat ginseng how to regulate the body	9
Can liver cancer patients eat crabs	9
What vegetable fish should the patient of liver cancer of advanced stage eat OK	9
Suffer from liver cancer can eat mulberry	9
What does liver cancer patient eat fry good	9
What fruit does liver cancer patient eat good	9
What is good to eat in the middle and late liver cancer	9
What can eat to prevent liver cancer	9
What does liver cancer eat to liver good	9
What does lung cancer liver cancer eat late good	9
What is good to eat after liver cancer surgery	9
What is good for liver tumor to eat	9
What to eat to prevent liver cancer	9
What does multiple liver cancer eat much good	9
What fruit does liver cancer eat good	9
What does gastric cancer turn liver cancer eat good	9
What can liver cancer late eat	9
What does the patient of liver cancer of advanced stage eat good	9
What fruit does liver cancer patient eat	9
What does early liver cancer eat	9
What does advanced liver cancer eat good	9
How does liver cancer eat not much do	9
What does liver cancer eat late	9
What to eat after liver cancer surgery	9
What fruit does the patient of liver cancer of advanced stage eat good	9
What can liver cancer not eat	9
What can liver cancer eat	9
What does vein cancer turn liver cancer patient eat good	9
What fish does liver cancer eat good	9
What does liver cancer patient avoid to eat	9
What food does liver cancer eat to treat well	9
What does liver cancer patient eat good	9
Can liver cancer eat egg yolk	9
What fruit does the person of liver cancer eat good	9
What fruit does liver cancer patient eat good	9
What does liver cancer eat daily good ah	9
What does liver cancer patient eat good	9
What good is liver cancer chemotherapy to eat	9
What does liver cancer patient eat	9
What fruit does liver cancer eat	9
What is suitable for liver cancer patients to eat	9
What does liver cancer surgery eat good	9
What does liver cancer patient eat good	9
What can liver cancer eat	9
Liver cirrhosis liver cancer what to eat	9
What is the diet to prevent liver cancer	9
What fruit can liver cancer eat	9
What fruit does liver cancer eat late good	9
What is good to eat early liver cancer	9
What dish to eat for liver cancer	9
What can primary liver cancer eat	9
What meal does liver cancer eat	9
What is good to eat in late liver cancer	9
What is good to have cancer embolus liver cancer patient to eat	9
What food does liver cancer patient eat	9
What food does liver cancer eat a bit good	9
What to eat for liver cancer	9
What meal is good for liver cancer	9
What is good to eat after primary liver cancer chemotherapy	9
What does the patient of liver cancer of advanced stage eat	9
Liver cancer to eat what thing good, take what medicine good	9
What food does liver cancer eat good	9
What food does liver cancer patient eat good	9
What does liver disease food therapy eat	9
What to eat to liver cancer good	9
Liver cancer daily attention what	9	10
What can liver cancer not eat	9
What fruit does liver cancer patient eat	9
What fruit does liver cancer patient eat good	9
What can liver cancer patients eat	9
What is good to eat with liver cancer	9
What is the dietary note of liver cancer patient	9
Small three Yang eat what food good fast	9
What should small three Yang not eat	9
Can I eat durian? My mother's liver cancer, her stomach is not very good,	9
Can you eat instant noodles after liver cancer surgery	9
What does primary liver cancer diet and daily aspect need to pay attention to	9	10
Is it good for liver cancer to eat dandelion	9
What is healthy eating habit to prevent liver cancer	9
Can you eat yam after liver cancer surgery	9
Can late liver cancer eat rice flour for breakfast	9
What does late liver cancer still ache to eat with dry mouth recently	9
Can liver cancer eat cordyceps sinensis	9
What cancer cannot eat Ganoderma lucidum	9
Can liver cancer eat coarse grain powder	9
Excuse me doctor liver cancer patient can eat crab	9
In the advanced stage of liver cancer, doctors recommend taking targeted drugs instead of surgery	9
Can liver cancer patients eat royal jelly	9
Can advanced liver cancer eat mutton	9
Patients with advanced liver cancer can eat ganoderma lucidum	9
Liver cancer can eat carrots	9
What thing is easy to digest in the late stage of liver cancer	9
Can you eat soft-shelled turtle after liver cancer interventional therapy	9
Can liver cancer patients eat ginger	9
Can liver cancer eat sea cucumber	9
Can liver cancer eat chicken	9
Can liver cancer eat sweet	9
Can liver cancer patients eat sea cucumber	9
Can liver cancer eat fish	9
Can liver cancer patients eat duck eggs	9
Can liver cancer eat sea cucumber	9
Can liver cancer patients eat sea cucumber	9
Can eggs be eaten in advanced stage of liver cancer	9
Can liver cancer patients eat meat	9
Can liver cancer patients eat natural soft-shelled turtle	9
What can second liver small three Yang not eat	9
What is the thing that big three Yang cannot eat	9
How should cirrhosis patient maintain what to eat more	9
What is the method that liver cancer survives 20 years liver cancer how food is treated	9
What should primary liver cancer diet pay attention to	9
What does the patient who suffers from liver cancer diet need to notice	9
What should be noticed on the diet of liver cancer	9
What does liver cancer interventional diet notice after operation	9
What should the diet of liver cancer patient pay attention to	9
What should the diet of liver cancer notice a few just go	9
What should liver cancer patient's diet notice	9
What does liver cancer diet need to pay attention to	9
What should the patient of liver cancer pay attention to on diet	9
What diet should liver cancer pay attention to	9
What does the diet notice after liver cancer interventional operation	9
What should be paid attention to in the postoperative diet of patients with liver cancer	9
What should be paid attention to on the diet of patients with liver cancer	9
What matter should daily diet of liver cancer patient pay attention to	9
What does liver cancer need to pay attention to daily	9	10
What should liver cancer patients pay attention to in their daily diet	9
Liver cancer patients need to pay attention to what on the diet	9
What are the dietary precautions for postoperative patients with liver cancer	9
What should pay attention to eat what good after liver cancer does intervene	9
Have liver cancer patient at home, what should notice	9	10
What should the diet of advanced liver cancer patients pay attention to	9
What does liver cancer patient eat good, what does diet aspect have to note	9
Dietary precautions for patients with liver cancer	9
What should the patient diet of liver cancer notice	9
What should the diet of liver cancer patient pay attention to	9
The dietary precautions after liver cancer surgery	9
What food can liver cancer not eat	9
Can liver cancer eat bacon	9
What food can liver cancer patient eat	9
How does the liver maintain what food to eat	9
Is it good for liver cancer to eat Ganoderma	9
Can liver cancer eat sweets	9
What food does liver cancer eat to recover well	9
Liver cancer late, what food can you eat ah liquid food can eat what	9
What should be paid attention to in daily life and diet of patients with advanced liver cancer	9
What does liver cancer diet eat better	9
What are the dietary precautions for patients with advanced liver cancer	9
What is liver cancer postoperative diet attention	9
Can you eat beef after liver cancer surgery	9
What should liver cancer patient's diet pay attention to	9
What does the diet of liver cancer have to note	9
What problem should liver cancer patient's diet pay attention to	9
What should the diet of liver cancer patient notice	9
What does diet need to notice after liver cancer operation	9
What should liver cancer diet notice	9
Is it useful to eat zein for liver cancer	9
What should liver cancer diet pay attention to	9
Can late liver cancer eat ejiao	9
Can liver cancer eat Ganoderma	9
Can liver cancer beans eat	9
What food is suitable for early liver cancer	9
Can liver cancer eat watermelon	9
What are the fruits that cannot be eaten during chemotherapy	9
Can liver cancer eat tomato	9
What can you eat after early liver cancer surgery	9
Can liver cancer late eat beets	9
Can B liver smoke	10
What should liver cancer patients pay attention to in life	10
What aspects should be paid attention to in daily life of patients with liver cancer	10
Can B liver drink a small amount of beer	10
Can you drink after colon cancer surgery	10
What precautions should be taken in daily life of patients with liver cancer	10
Life precautions of liver cancer	10
Can cancer patients drink alcohol	10
Do liver cancer patients have to stop drinking	10
The patient who has suffered from liver cancer has diet that needs attention	10
What precautions should be taken in the daily life of liver cancer patients	10
Alcoholic liver continues to drink what are the hazards	10
B virus hepatitis drink a bottle of beer harm has what	10
What are the hazards of long-term drinking	10
What can the late symptom of liver cancer have to do exercise	10
What is the note in second liver life	10
What are the hazards of drinking beer for a long time	10
What are the harms of drinking in girls	10
Can liver cancer drink yoghurt, what should be noted	10
What are the dietary precautions after liver cancer intervention	10
The patient who got liver cancer usually pays attention to what diet	10
What are the dangers of alcohol	10
B liver big three Yang small three Yang why should forbid alcohol	10
What should second liver patient's life notice	10
What benefit does drink liquor have	10
What does liver cancer need to notice in life	10	10
How to carry out rehabilitation exercise reasonably for patients with liver cancer	10
What should liver cancer patients pay attention to at ordinary times	10
What does big three Yang notice	10
Can you drink after curing hepatitis C	10
Is liver cancer drunk	10
Can the person that suffer from liver cancer taxus root bubble wine to drink	10
Can small three Yang drink red wine	10
How to exercise after liver cancer surgery	10
Can small three Yang drink liquor	10
Can second liver small three Yang drink red wine	10
Is second liver drink wine occasionally	10
B liver small 3 Yang can drink	10
Is second liver drink beer occasionally	10
Can C liver drink	10
Can drinking cause cancer recurrence	10
Can liver cancer patients drink alcohol	10
Can people infected with hepatitis B drink alcohol	10
How does second liver drink	10
Regular hospital treatment of liver cancer price	11
Provincial people's hospital treats liver tumor how much money	11
Which hospital is the best to treat liver tumors	11
What tests are needed for chronic abdominal pain	11
Surgical Hospital for treating liver tumors	11
Liver Hospital	11
Treat liver cancer surgery to the best hospital	11
Treatment of liver cancer specialized hospitals	11
That hospital has the best treatment for liver cancer	11
Treatment of liver cancer which hospital is good	11
Which hospital is the best to go to for liver cancer treatment	11
Which hospital treats liver cancer	11
Hospital treatment of liver cancer prices	11
Better treatment of liver cancer hospital	11
How much is targeted therapy for liver cancer a month	11
Liver cancer does intervene how much money needs	11
Good hospitals treat liver cancer	11
Liver cancer interventional operation how much money	11
Liver cancer interventional therapy needs how much money	11
Carbohydrate antigen ca15-3 check how much	11
2. What is the price of replacing norfovir	11
Liver cancer targeted drug sorafenib how much is a box	11
The cost of treating liver cancer in large hospitals	11
How much is a liver transplant	11
How much is the price of the targeted drug of liver cancer Dogemax	11
How much is early cancer screening	11
Interventional treatment of liver cancer probably needs how much money	11
How much money does liver puncture want	11
Treatment of liver cancer hospital which	11
Which hospital treats liver cancer better	11
Liver cancer chemotherapy how much money	11
How much money is needed to treat liver cancer	11
How much money is needed to treat liver tumor	11
How much money is liver cancer embolized to treat	11
How much is radiofrequency ablation of liver cancer	11
How much money is interventional therapy for liver disease	11
How much is the treatment of liver cancer surgery	11
Liver cancer target drug price how much	11
Which hospital treats liver cancer better	11
What is the price of targeted drugs for liver cancer	11
Chongqing Southwest Hospital confirmed 90% liver cancer	11
Liver cancer vaccine how much money	11
How much does alpha-fetoprotein check cost	11
How much does a male tumor marker five test cost	11
Liver cancer treatment how much money	11
Is targeted therapy reimbursed	11
Liver, gallbladder, pancreas, spleen and kidney color ultrasound how much money	11
Radiofrequency knife treats liver cancer how much money	11
How much does the liver resection cost	11
People's hospital treats liver cancer how much money	11
Liver cancer interventional therapy how much money	11
Check liver cancer how much money	11
Are targeted drugs for liver cancer covered by medical insurance	11
What are the signs 5 days before the death of patients with advanced liver cancer	11
How much is targeted drug 7080 for liver cancer	11
Primary liver cancer operation how much money	11
Which hospital is good for liver cancer in Chinese medicine	11
How much does early liver cancer surgery want	11
Is liver cancer reimbursed	11
The price of radiotherapy for liver cancer	11
Conservative treatment of advanced liver cancer every day how much money	11
How long can radiofrequency ablation of liver cancer recover	12
Liver cancer can be cured	12
Is the recurrence rate of liver cancer after radiofrequency ablation high	12
Is interventional therapy necessary after surgical resection of liver cancer	12
Liver cancer does radiofrequency ablation can live a few years	12
How long does it take for liver cancer to recover from interventional surgery	12
How long to recover after liver cancer interventional therapy	12
Is it safe to have no recurrence of liver cancer after interventional treatment for 5 years	12
Can small liver cancer not recur in 5 years be good	12
Liver cirrhosis patients with advanced liver cancer hospital said that the maximum three months of pain	12
How often to get out of bed for liver interventional surgery	12
How long does the process of liver cirrhosis to liver cancer probably take	12
Liver cancer chemotherapy can live how long	12
How long can women live with hepatitis B	12
Can multiple liver cancer cure how long can live	12
How long can advanced liver cancer ascites live	12
How long do people with liver disease live	12
How long you can live with advanced liver cancer	12
How long can patients live with early-stage liver cancer	12
How long can hepatitis B carriers live	12
How long can you live after liver cancer surgery	12
How long can you live after surgery for advanced liver cancer	12
How long can you live with the treatment of advanced liver cancer	12
How long can you live with cancer edema	12
How long you can live after a liver replacement	12
How long can patients live after interventional treatment of liver cancer	12
How long can hepatic encephalopathy live	12
In the middle stage of liver cancer, how long can women survive	12
How long can liver cancer live generally	12
How long do people with hepatitis C live	12
How long do hepatitis B patients live	12
How long can you live with chronic hepatitis B	12
How long can early liver cancer live at most	12
How long can you live with hepatitis B cirrhosis	12
How long can patients with liver cancer live after interventional therapy	12
How long can viral hepatitis B live	12
How long can you live with hepatitis	12
How long can you live with liver cancer	12
How long can hepatitis B live by drinking regularly	12
How long can you live with advanced liver cancer ascites	12
How long can patients live with advanced cancer	12
How long can you live with viral hepatitis B	12
How many years can you live without treatment of hepatitis B	12
How long can you live with liver cancer	12
How long can you live in the middle of liver cancer	12
How long to live in the early stage of multiple liver cancer	12
How long can liver cancer survive by vomiting blood	12
How long can liver cancer live in the middle stage	12
How long can you live with chronic hepatitis	12
How long do patients with advanced liver cancer live	12
How long can a hepatitis C patient live	12
How long can a liver cancer patient live with hematemesis	12
How long can you live after liver resection in advanced liver cancer	12
Liver cancer foot swelling still can live how long	12
How long can patients with hepatitis B live	12
How long can cancer patients live	12
How long can you live with hepatitis B resistance	12
How long can you live in the middle stage of cirrhosis	12
How long can you live with malignancy	12
How long can people who have their livers removed live	12
How long can cancer live with itchy skin	12
Liver cancer advanced hematemesis survival is how long	12
How long can the advanced stage of primary liver cancer live	12
Symptoms of advanced liver cancer, and how long to live	12
How long can moderately differentiated liver cancer live	12
How long can you live with advanced liver cancer	12
The most you can live with liver cancer	12
How long can primary liver cancer live	12
How long can primary liver cancer live	12
How long can advanced liver cancer live	12
How long can you live with viral hepatitis	12
How long do you live in advanced liver cancer	12
How long can you live with interventional treatment of liver cancer	12
Liver cancer tumor diameter 10 centimeters can live how much time	12
What is the probability of living for 20 years with conservative treatment of liver cancer	12
18 years of survival after interventional therapy for liver cancer	12
Primary liver cancer can live for several years	12
Liver cancer can not be operated on such a situation can still live how long	12
How long can 10cm liver cancer live	12
Is cirrhosis 53 enough to live to 80	12
The survival rate of liver cancer surgery	12
How long can the female of B virus hepatitis live on average	12
B virus hepatitis small three Yang can live how long	12
How long can you live with hepatitis B 145 positivity	12
What is the 10-year survival rate of 2cm small liver cancer, and what causes the formation of small liver cancer	12
Liver cancer interventional therapy can live for 2 years	12
Can interventional treatment of liver cancer live for 5 years	12
Liver cancer can live for several years	12
Live for years after liver cancer ablation	12
What is the probability of hepatocellular carcinoma taking targeted drugs to live for 7 or 8 years	12
How long can centimeter-sized liver cancer survive after surgery	12
How many years can liver cancer survive after radiofrequency ablation	12
Ascites can live for a few days at most	12
How long can small three Yang live on average	12
How long liver HCC can live	12
Can you live 20 years in the middle stage of liver cirrhosis	12
Can the person who gets hepatitis B not live to be 50	12
What is the liver transplant survival rate	12
Liver cancer gastrointestinal bleeding survival period	12
How long can people live once they take entecavir	12
What is the 20-year survival rate of small hepatocellular carcinoma after operation	12
How is the prognosis of liver cancer how to prevent liver cancer	12	3
What is the five-year survival rate after small liver cancer surgery	12
What is the survival rate of liver cancer after middle operation	12
How long can you live after liver resection	12
How long can you live with liver cancer that spreads throughout your body	12
How long can you live with advanced alcoholic liver disease	12
How long can liver cancer spread to blood vessels	12
How long can you live with liver cancer metastasis	12
How long can liver cirrhosis with hepatocellular carcinoma live	12
How long to live with advanced liver cancer	12
How long can advanced liver cancer be treated with intervention	12
How long can the advanced metastatic spread of liver cancer live	12
How long can patients survive after surgery for secondary liver cancer	12
How long can second liver small three Yang live	12
Liver cancer recurrence can live how long	12
How long can you live without eating or drinking in advanced liver cancer	12
How long can you live after interventional therapy in advanced liver cancer	12
How long can you live with hepatitis B	12
How long to live with advanced cancer deterioration	12
How long can you live with a late relapse of cancer	12
How long can you live with cancer metastasis	12
How long can lung metastasis of liver cancer live	12
How long can you live with hepatitis B from an early age	12
How long can you live after interventional treatment of ruptured liver cancer	12
How long to live in advanced liver cancer	12
How long to live if the cancer spreads	12
How long can you live with liver ascites in advanced liver cancer	12
Liver cancer can generally live how long	12
How long can liver cancer metastasize to the lung	12
How long can you live without eating and drinking only water in advanced cancer	12
How long can cancer ascites live	12
How long can advanced liver cancer survive after interventional therapy	12
How long can patients with intrahepatic cholangiocarcinoma live	12
How long can patients with metastatic liver cancer live without treatment	12
How long can patients with advanced liver cancer live before death symptoms	12
How long can the tumor live commonly in advanced stage	12
How long you can live after a liver transplant	12
How long can primary liver cancer live generally	12
How long can liver coma live	12
How long can you live with advanced cancer spread	12
How long you can live after the tumor has returned	12
How long can you live with liver cancer with ascites in your stomach	12
How long can you live with metastatic liver cancer	12
How long can you live with fever in advanced liver cancer	12
How long can you live with advanced spread of cancer	12
How long can giant liver cancer live	12
How long do men on average live with viral hepatitis B	12
How long can bone metastasis of liver cancer live	12
How long can liver cancer live with conservative treatment	12
How long is the leg of advanced cancer swollen	12
How long can you live after advanced liver cancer intervention	12
How long can you live without eating in advanced liver cancer	12
How long can patients with hepatitis B live on average	12
How long does the survival period of advanced liver cancer not eat food still have	12
Liver cancer advanced liver coma can live how long	12
Liver cancer tumor 7 cm cure can live how long	12
How long can you live with half hepatectomy	12
How long to live with severe fatty liver	12
How long can liver cancer metastasize lung cancer live	12
Got advanced liver cancer can live how long	12
How long can a large amount of hemoptysis live in advanced liver cancer	12
How long to live with hepatitis C	12
How long to live after resection of advanced liver cancer	12
How long can you live with decompensated liver	12
How long to live after early liver cancer surgery	12
How long can you live after liver intervention	12
How long can you live after liver coma	12
How long can you live with blood in the late stage of cancer	12
How long can you live if your liver cancer cells spread	12
How long can patients with lung metastases from liver cancer live	12
How long can big three Yang live	12
Advanced liver cancer can not eat how long to live	12
How long can you live with advanced liver cancer pain	12
How long can liver cancer live	12
How long does the average person live with viral hepatitis B	12
How long can multiple lesions in the liver live	12
How long can you live if the tumor metastasizes	12
How long can cancer jaundice live	12
How long can you live with liver disease	12
How long can liver cirrhosis live with hydrops	12
How long can you live after liver tumor resection	12
Primary liver cancer can live for several years	12
B liver cirrhosis can live 40 years	12
What are the odds of living to 80 years of age with compensated cirrhosis	12
Can you live beyond 5 years with primary liver cancer	12
Can alcohol liver develop into liver cancer	12
Advanced liver cancer into icu can live for a few days	12
What is the survival rate of intrahepatic cholangiocarcinoma	12
How long can liver cancer live	12
How long is the survival time of liver cancer	12
How long can chronic hepatitis B live	12
Does liver cancer survive for a long time	12
How long you can live after liver transplantation	12
How long can liver cancer survive in general	12
How long can patients with liver cancer generally live	12
Find out how long you can live until you die of liver cancer	12
How long can children live after liver transplantation	12
Liver cancer in the middle of the weak conservative treatment can live how long	12
Can small liver cancer survive for a long time	12
Is it possible to live 20 years with conservative treatment for liver cancer	12
Can patients with lung metastasis from liver cancer live for ten years	12
Can liver cancer ascites still live for a month	12
Can you live 20 years after liver cancer resection	12
Can you live 20 years after surgery for early-stage liver cancer	12
Is the 20-year survival rate of small hepatocellular carcinoma after operation high	12
Can you live 10 years after liver cancer surgery	12
Can liver cancer interventional operation live for 5 years	12
Liver cancer did 12 times operation survival still has how long	12
How long can you live with advanced liver cancer that has spread	12
How long can you live if you have lethargy, emaciation and weakness in the late stage of liver cancer	12
Liver cancer at the end of the stage, has metastasised lethargy can live how long	12
Symptoms of advanced liver cancer can live a few years	12
Advanced liver cancer pumping can live for a few days	12
How long can cancer metastasize and spread in advanced stage live	12
Got advanced liver cancer how long can live	12
Cancer will die if you don't eat or drink for a few days	12
Can advanced cancer spread live for 10 years	12
Patients with advanced liver cancer can live for a few days by vomiting blood	12
How does second liver activity do in the heart fear	12
Can abstinence cure alcoholic liver disease	12
How long can hepatitis B virus carriers live	12
How long can 40 years old liver transplant live	12
B liver big three Yang can live how long	12
How long can hepatitis C virus survive	12
How long does small three Yang of B virus hepatitis live at most	12
How long can you live with hepatitis B at 52 years old	12
B viral hepatitis live to 80 years old much	12
How long can women live with hepatitis B virus	12
B virus hepatitis big three Yang can live how long	12
B liver small three Yang can live how long	12
How long can hepatitis B virus carriers live	12
B liver big three Yang can live how many years	12
How many years can hepatitis B live the longest	12
How long can male hepatitis B live	12
Early liver cancer can live for several years	12
Can advanced liver cancer live for ten years	12
Patients with advanced liver cancer can live for several years	12
Constipation in advanced liver cancer is not how long to live	12
How many years can you live after early liver cancer resection	12
Does early liver cancer survive long after surgery	12
How long can liver cancer live after interventional treatment	12
Liver cancer can live a few years late liver cancer life is how many	12
